# Supplementary material for: Tissue-specific endothelial cell heterogeneity contributes to unequal inflammatory responses
Source: PubMed Central journal article supplement (PMC7820348; doi:10.1038/s41598-020-80102-w), 2021-01-21
Supplement: 41598_2020_80102_MOESM1_ESM.pdf [file 41598_2020_80102_MOESM1_ESM.pdf]

# Supplementary File

Tissue-specific endothelial  
cell heterogeneity  
contributes to unequal  
inflammatory responses

Hasitha Gunawardana, Tahmineh  
Romero, Ning Yao, Sebastiaan  
Heidt, Arend Mulder, David A  
Elashoff, Nicole M Valenzuela

## Supplemental Figure Legends

**Figure S1.** Weighted Correlation Network Analysis of transcript changes within cardiac allograft biopsies with rejection vs. stable. Heat map of genes assigned to the Turquoise Module by WCGNA, comparing rejection to non-rejection/normal [GSE124897].

**Figure S2.** Gating strategy for assessing differential adherence of PBMC subsets. Endothelial cells alone, PBMC alone, or endothelial cells mixed with PBMC were stained and acquired by flow cytometry.

- a) Debris was gated out by forward scatter and side scatter to gate the live fraction.
- b) Endothelial cells were gated as CD105<sup>bright</sup>, CD11a<sup>negative</sup>. Doublets of EC and leukocytes were CD105<sup>bright</sup>, CD11a<sup>bright</sup>. Subsequent gating showed that the doublets were also CD14<sup>high</sup>.
- c) Non-endothelial cells (CD105<sup>neg</sup>) were first gated as follows: CD105<sup>-</sup>CD3<sup>+</sup> T cells, CD105<sup>-</sup>CD19<sup>+</sup> B cells, and not T or B cells CD105<sup>-</sup>CD3<sup>-</sup>CD19<sup>-</sup>.
- d) Monocytes were gated from the not T or B fraction as CD105<sup>-</sup>CD3<sup>-</sup>CD19<sup>-</sup>CD56<sup>-</sup>CD14<sup>+</sup> monocytes.
- e) NK cells were gated as CD105<sup>-</sup>CD3<sup>-</sup>CD19<sup>-</sup>CD14<sup>-</sup>CD56<sup>+</sup> NK cells.
- f) As a control, endothelial cells alone were stained with the immunophenotyping panel. Gating results for the input fraction of EC alone are shown (n=3), demonstrating >90% of cells fell within the endothelial gate.
- g) For each PBMC donor, as a control, PBMC alone were stained with the immunophenotyping panel. Gating results for the input fraction of PBMC alone are shown (n=6), with less than 5% of events falling into the endothelial cell gate. PBMC subsets T cells, B cells, NK cells and monocytes were represented with expected proportions for healthy controls.
- h) For each experiment, as a control, total input of PBMC and endothelial cells was stained with the immunophenotyping panel. Gating results for the control input fraction are shown (n=6).

**Figure S3.** Differential adherence of allogeneic PBMC to cytokine-activated endothelial cells. Endothelial monolayers were stimulated with TNF $\alpha$  (20ng/mL) or IL-1 $\beta$  (20ng/mL) for 4hr or 18hr. Stimulation medium was removed, and whole PBMC fractions were added at a ratio of 3 PBMC to 1 endothelial cell and allowed to adhere for 45 minutes. Nonadherent cells were removed by two washes with HBSS with Ca<sup>2+</sup> and Mg<sup>2+</sup>, and adherent cells were detached by a third wash

with PBS without Ca<sup>2+</sup> and Mg<sup>2+</sup> followed by treatment Accutase. Adherent cells were stained with an immunophenotyping panel and acquired by flow cytometry.

- a) Each subset as a percent of live cells is shown in the bar graphs. Summary results of the adherent fraction to untreated EC (open circles) and to TNF $\alpha$  4hr-treated EC (black circles) are shown. \*\*  $p < 0.01$ , \*\*\*\*  $p < 0.0001$  comparing untreated to TNF $\alpha$ .
- b) The ratio of T cells to endothelial cells within each experiment is shown. Untreated conditions are graphed in the white bars, TNF $\alpha$  4hr activated endothelial cells in the black bars, and IL-1 $\beta$  in the gray bars. Results are presented as mean  $\pm$  SEM.
- c) The ratio of B cells to endothelial cells within each experiment is shown. Untreated conditions are graphed in the white bars, TNF $\alpha$  4hr activated endothelial cells in the black bars, and IL-1 $\beta$  in the gray bars. Results are presented as mean  $\pm$  SEM.
- d) The ratio of NK cells to endothelial cells within each experiment is shown. Untreated conditions are graphed in the white bars, TNF $\alpha$  4hr activated endothelial cells in the black bars, and IL-1 $\beta$  in the gray bars. Results are presented as mean  $\pm$  SEM.
- e) The ratio of monocytes to endothelial cells within each experiment is shown. Untreated conditions are graphed in the white bars, TNF $\alpha$  4hr activated endothelial cells in the black bars, and IL-1 $\beta$  in the gray bars. Results are presented as mean  $\pm$  SEM.
- f) The ratio of T cells to endothelial cells within each experiment is shown. Untreated conditions are graphed in the white bars, TNF $\alpha$  18hr activated endothelial cells in the black bars, and IL-1 $\beta$  in the gray bars. Results are presented as mean  $\pm$  SEM.
- g) The ratio of B cells to endothelial cells within each experiment is shown. Untreated conditions are graphed in the white bars, TNF $\alpha$  18hr activated endothelial cells in the black bars, and IL-1 $\beta$  in the gray bars. Results are presented as mean  $\pm$  SEM.
- h) The ratio of NK cells to endothelial cells within each experiment is shown. Untreated conditions are graphed in the white bars, TNF $\alpha$  18hr activated endothelial cells in the black bars, and IL-1 $\beta$  in the gray bars. Results are presented as mean  $\pm$  SEM.
- i) The ratio of monocytes to endothelial cells within each experiment is shown. Untreated conditions are graphed in the white bars, TNF $\alpha$  18hr activated endothelial cells in the black bars, and IL-1 $\beta$  in the gray bars. Results are presented as mean  $\pm$  SEM.

**Figure S4.** Expression of chemokines. After activation with  $\text{TNF}\alpha$  (20ng/mL) or  $\text{IL-1}\beta$  (20ng/mL), stimulated endothelial cells were lysed in RLT buffer, and mRNA for immune response genes was measured by Nanostring.

a-o) Normalized mRNA counts for each chemokine gene are shown in the bar graphs, for primary endothelial cells left untreated (green bars) or stimulated for 4hr with  $\text{TNF}\alpha$  (red bars) or  $\text{IL-1}\beta$  (blue bars). One representative experiment is shown.

**Figure S5.** Adhesion molecule expression after  $\text{TNF}\alpha$  stimulation.

a-f) Normalized mRNA counts for each adhesion molecule gene are shown in the bar graphs, for primary endothelial cells left untreated (green bars) or stimulated for 4hr with  $\text{TNF}\alpha$  (red bars) or  $\text{IL-1}\beta$  (blue bars).

**Figure S6.** HLA antibody binding and induced complement deposition on endothelial cells.

a) HAEC, HCMVEC, HPAEC, HLMVEC, and HLSEC were treated with a monoclonal HLA antibody mixture (HLA-A2/A28+A2/B17+A3/A11+HLA I hlgG1, each at 0.5ug/mL) in the presence of intact (light pink and dark pink bars) or inactive (blue bars) human serum complement (25% or 50%) for 4hr or 18hr. Cells were detached with Accutase, then stained for bound human IgG and measured by flow cytometry.

b) The fold increase in hlgG bound to HAEC, HCAEC and HLSEC is shown (mean +/- SEM, n=3). Control anti- $\beta$ gal hlgG1 did not bind to cells. There was no significant difference in HLA antibody bound to each cell type, when exposed to the mixture of HLA class I monoclonal antibodies.

c, d) HAEC were treated with monoclonal HLA antibodies (HLA-A2/A28+A2/B17+A3/A11 hlgG1, each at 0.5ug/mL) in the presence of intact (pink bars) or inactive (blue bars) human serum complement (25% or 50%) for 20min. Deposition of hlgG (c) and SC5b-9 (MAC) (d) were detected with rabbit anti-SC5b-9 followed by anti-hlgG-BV510 and anti-rb-PE.

e) Gene expression in endothelial cells following HLA antibody-induced complement activation. Scatter plot shows gene expression changes in HAEC stimulated with monoclonal HLA antibody mixture and complement (HLA+C') for 4hr or 24hr, or HLA antibodies and inactivated complement (HLA+iC') for 24hr.  $\text{Log}_2$  mRNA counts are normalized against untreated (black line).

f) Representative experiment showing no induction of adhesion molecules on HAEC compared with non-HLA mAbs at 6hr and 24hr. A chimeric hlgG1 antibody that binds to CD105 on endothelial cells does not trigger adhesion molecule expression in the presence of intact

human complement. Primary endothelial cells were stimulated with a single monoclonal anti-CD105 hIgG (1 $\mu$ g/mL) for 4hr or 18hr, and cell surface ICAM-1, E-selectin and VCAM-1 expression was measured by flow cytometry (n=6 independent experiments). Results are presented as the mean fold increase in MFI +/- SEM.

**Figure S7.**

- a) Mean fold increase in the MFI of cell surface E-selectin, ICAM-1 and VCAM-1 across HAEC, HCAEC, HCMVEC, HPAEC, HPMVEC and HLSEC is shown, after stimulation with HLA monoclonal antibody mixture and intact human complement for 4hr (n=3 donors per endothelial cell type). HLSEC vs. HAEC p<0.002 for E-selectin; HLSEC vs. HCMVEC p<0.1 for E-selectin; HLSEC vs. HAEC p=0.05 for VCAM-1; HLSEC vs. HCMVEC p<0.05 for VCAM-1 by two way ANOVA followed by uncorrected Fisher's LSD. Results are plotted as mean fold increase in each adhesion molecule  $\pm$  SEM.
- b) Mean fold increase in the MFI of cell surface E-selectin, ICAM-1 and VCAM-1 across HAEC, HCAEC, HCMVEC, HPAEC, HPMVEC and HLSEC is shown, after stimulation with HLA monoclonal antibody mixture and intact human complement for 24hr (n=3 donors per endothelial cell type). HLSEC vs. HAEC p=0.012 for E-selectin; HLSEC vs. HCMVEC p<0.1 for VCAM-1. Results are plotted as mean fold increase in each adhesion molecule  $\pm$  SEM.

**Figure S8.** Differential activation of HAEC, HCAEC and HLSEC by HLA allosera and complement.

HAEC (a-c), HCAEC (d-f) and HLSEC (g-i) were left untreated, stimulated with negative serum from non-sensitized patients, or stimulated with HLA sera from highly sensitized transplant candidates, in the presence of 25% human complement. Cell surface expression of E-selectin (a, d, g), ICAM-1 (b, e, h), and VCAM-1 (c, f, i) was measured by flow cytometry. One representative experiment is shown (n=3 total).

# Supplemental Figures

a

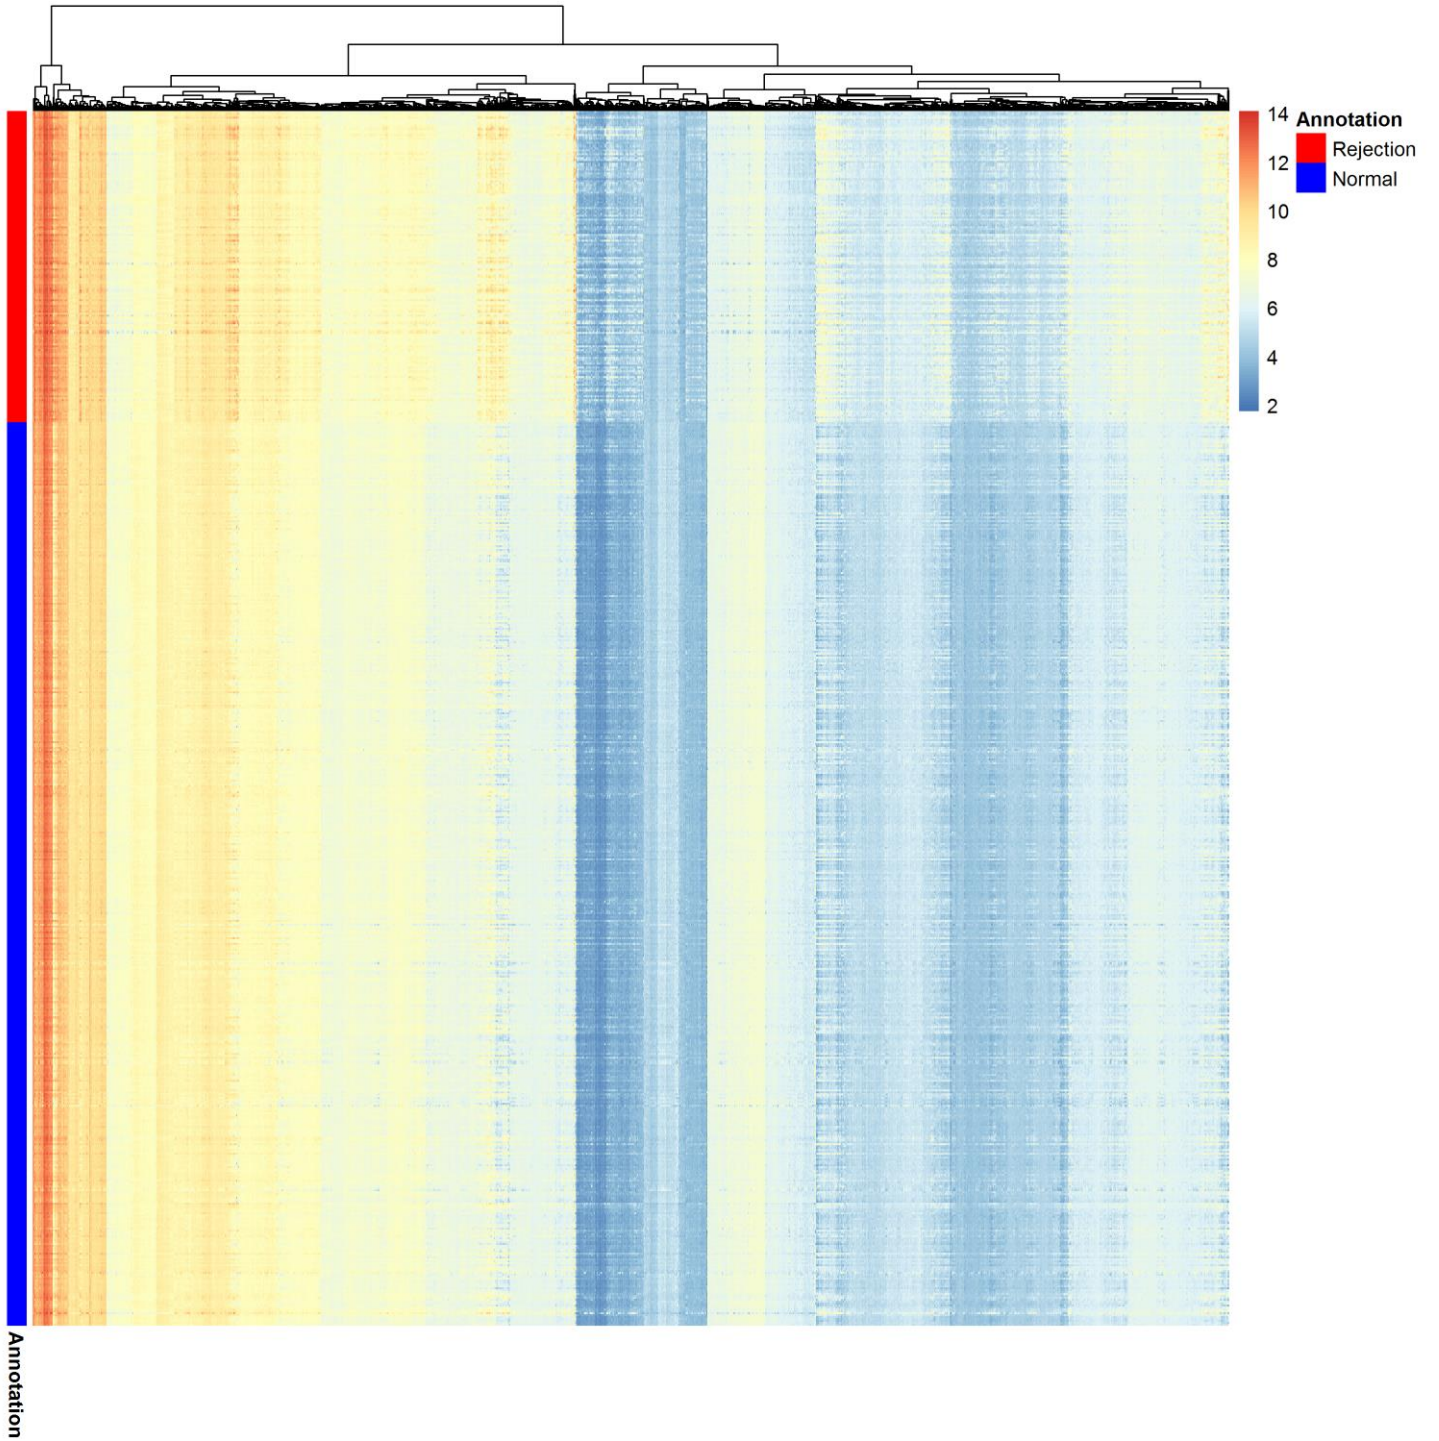

Figure S1.

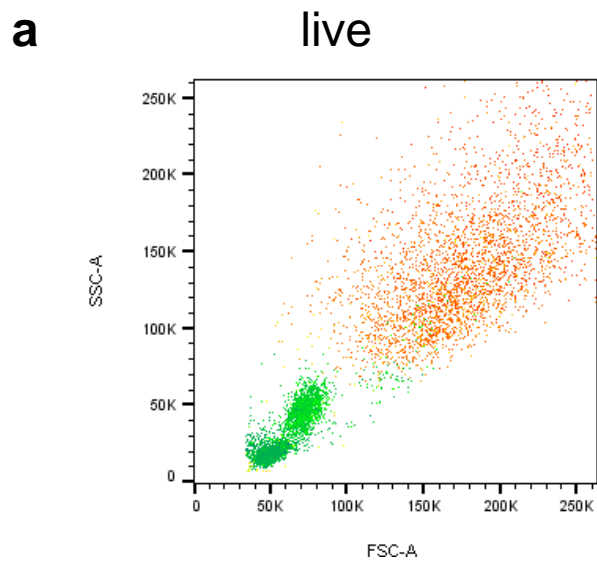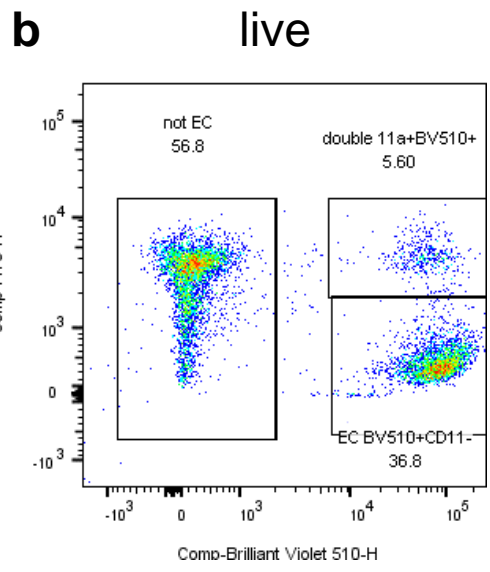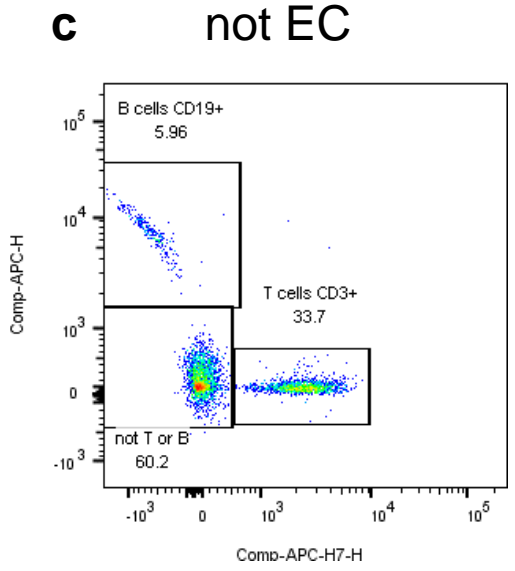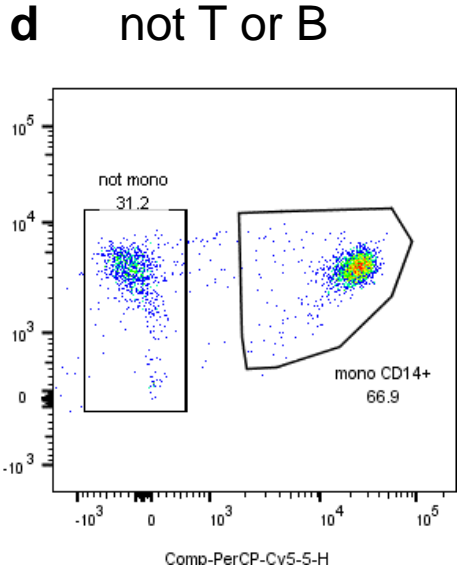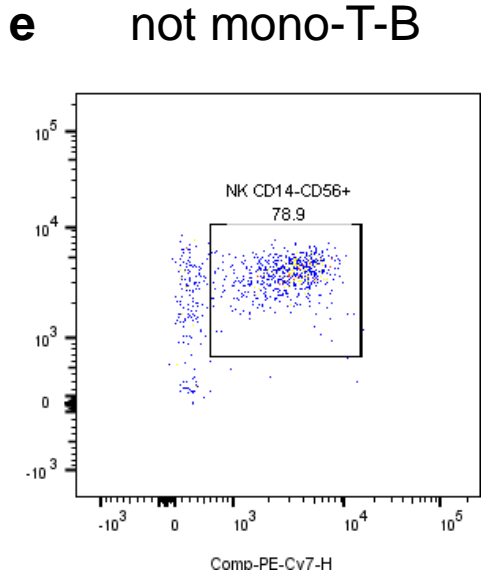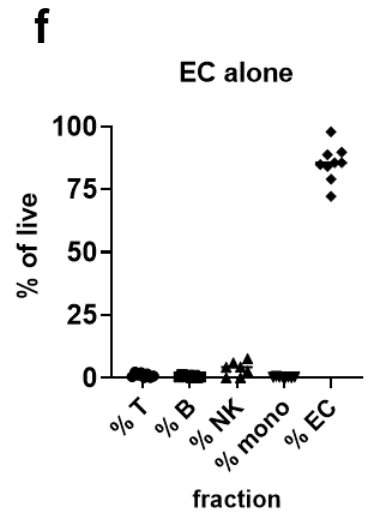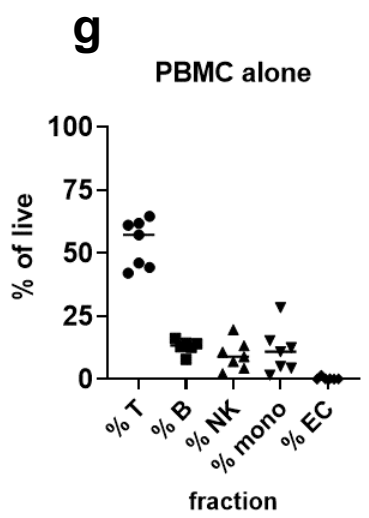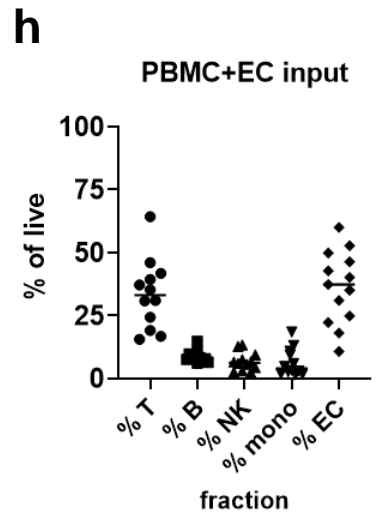

**Figure S2.**



### a Adherent Fraction

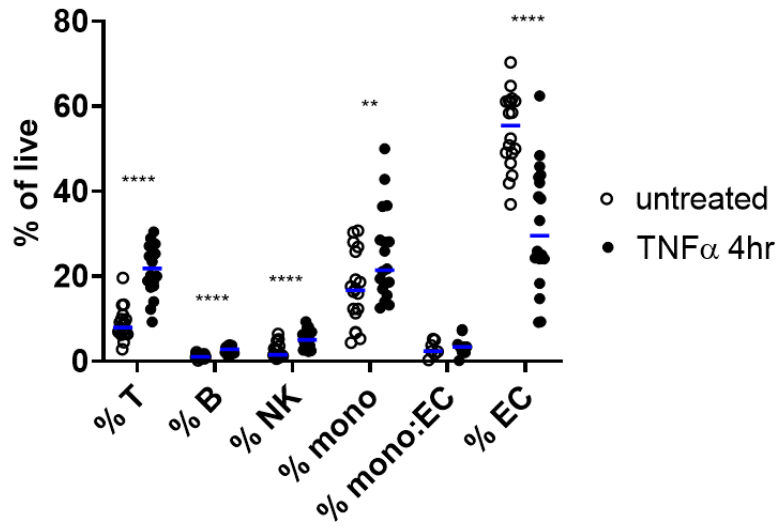

b

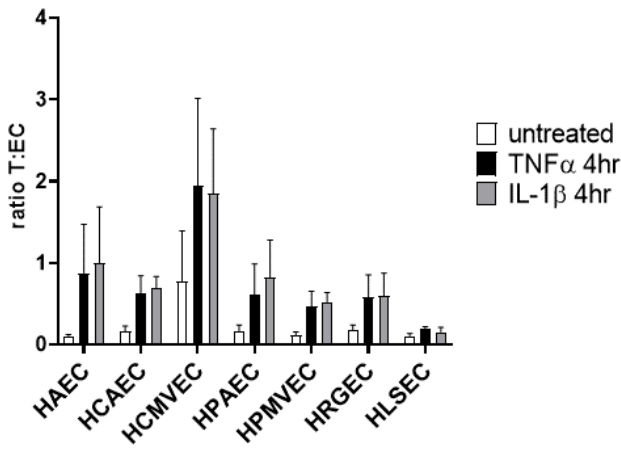

c

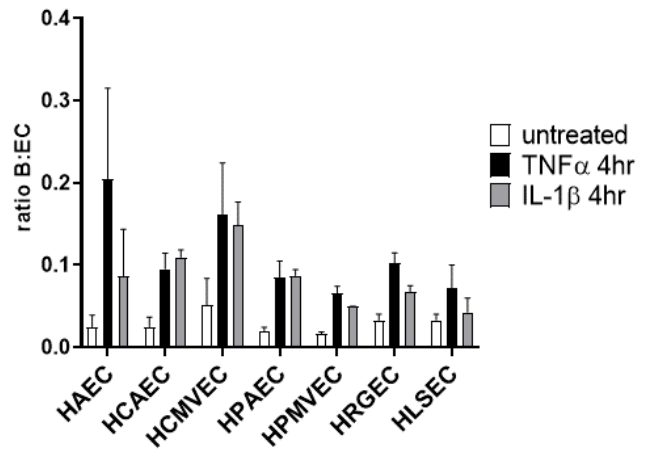

d

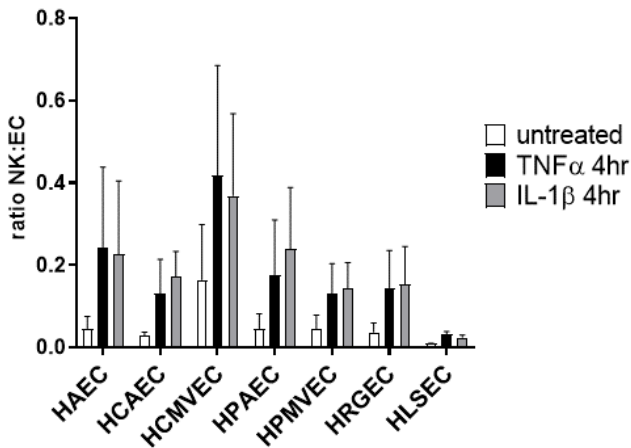

e

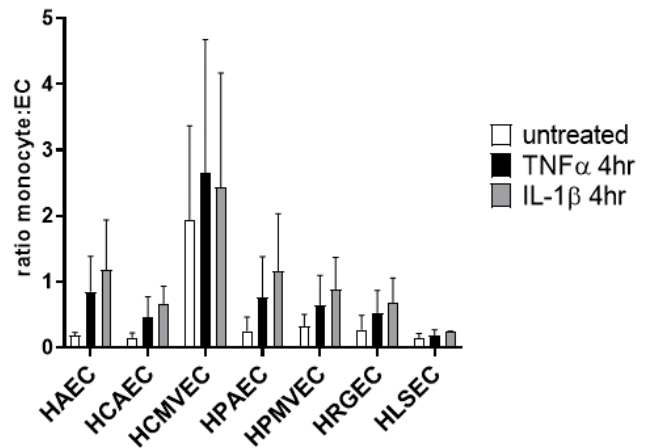

Figure S3.

**f**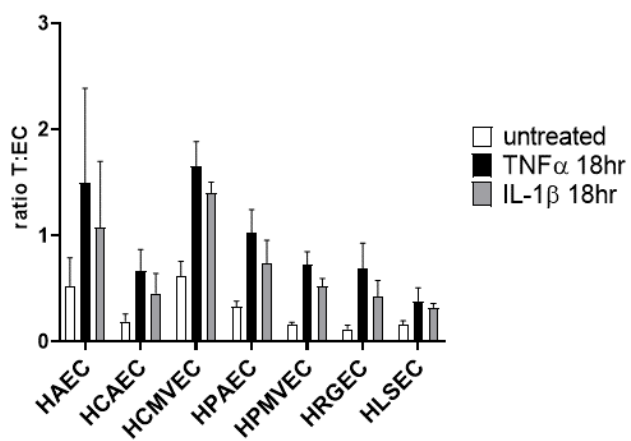**g**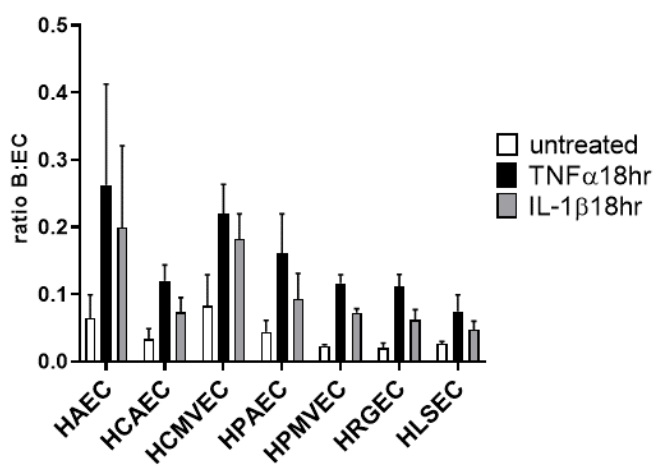**h**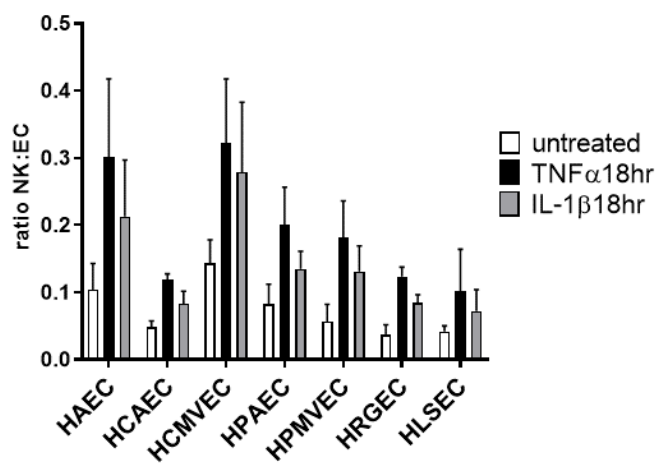**i**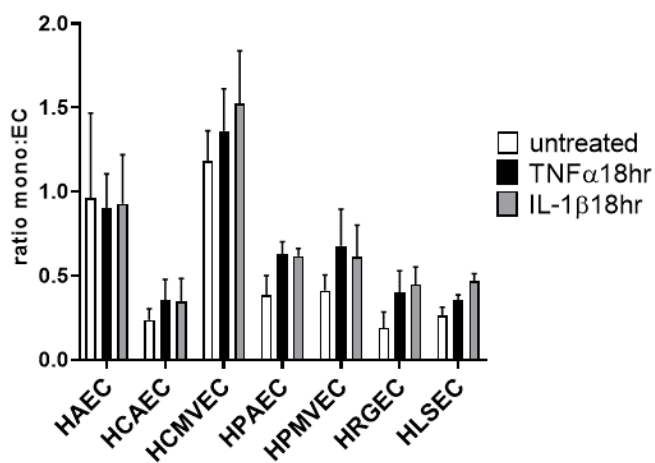**Figure S3.** (continued)

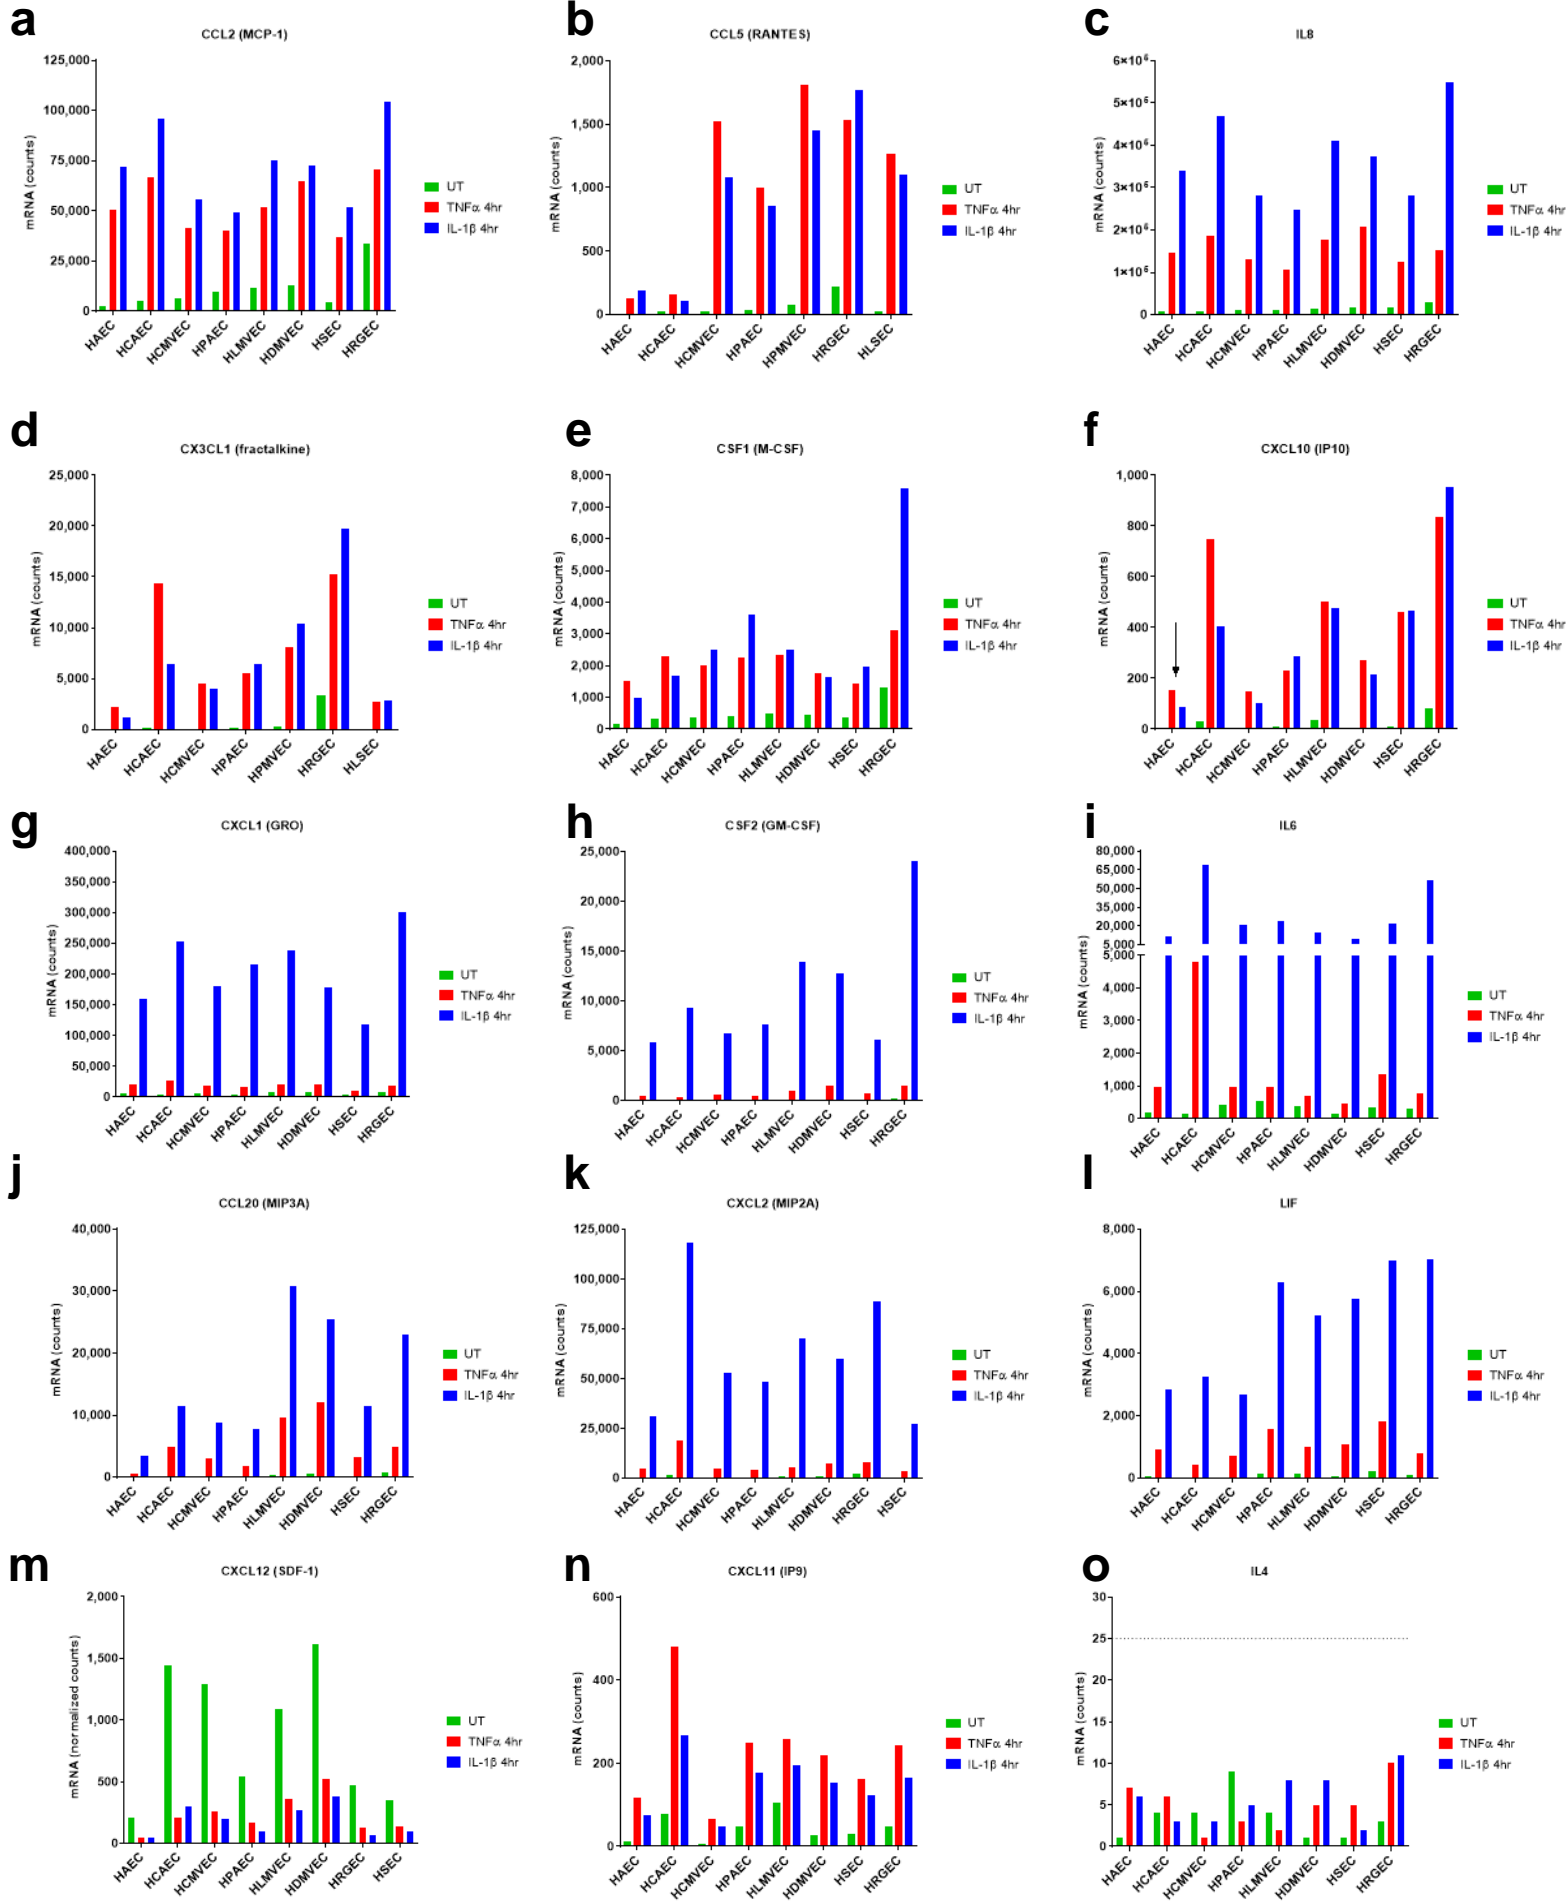

**Figure S4.**

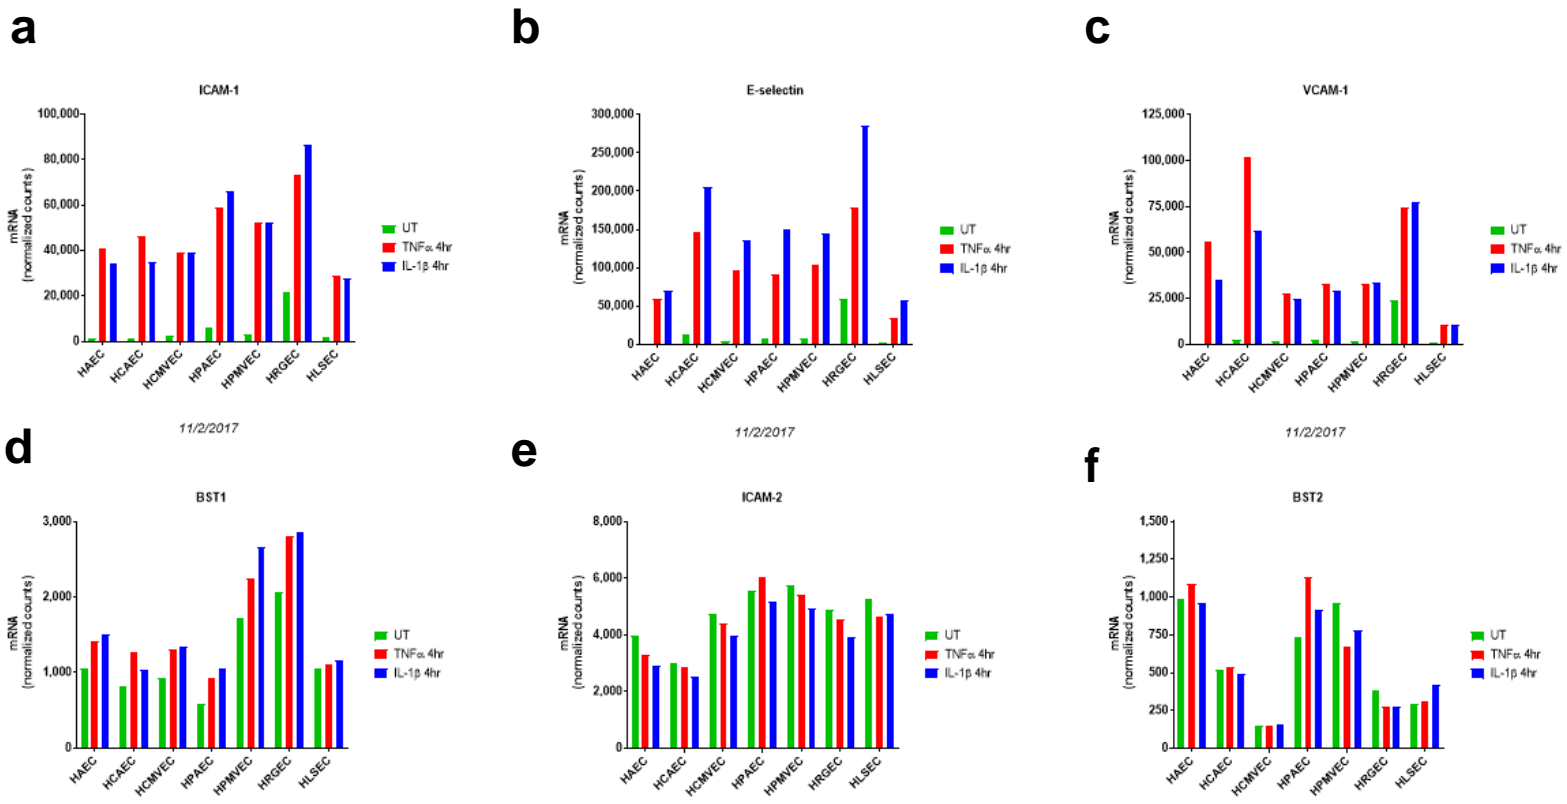

**Figure S5.**

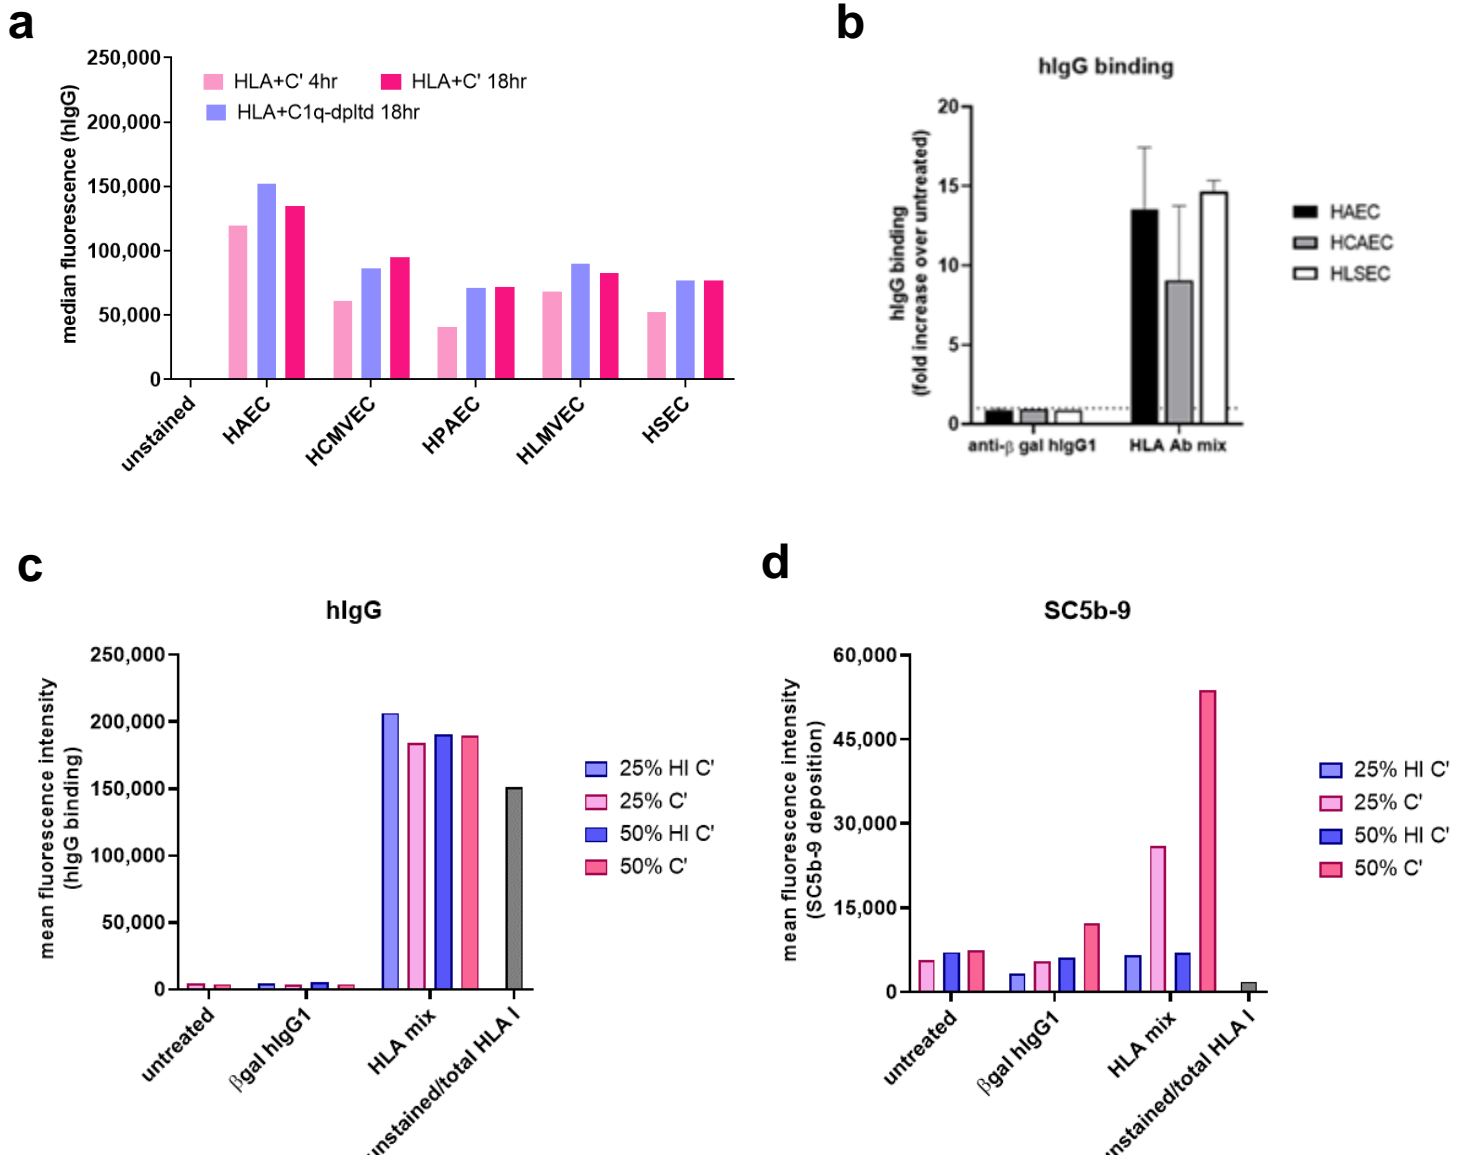

**Figure S6.**

e

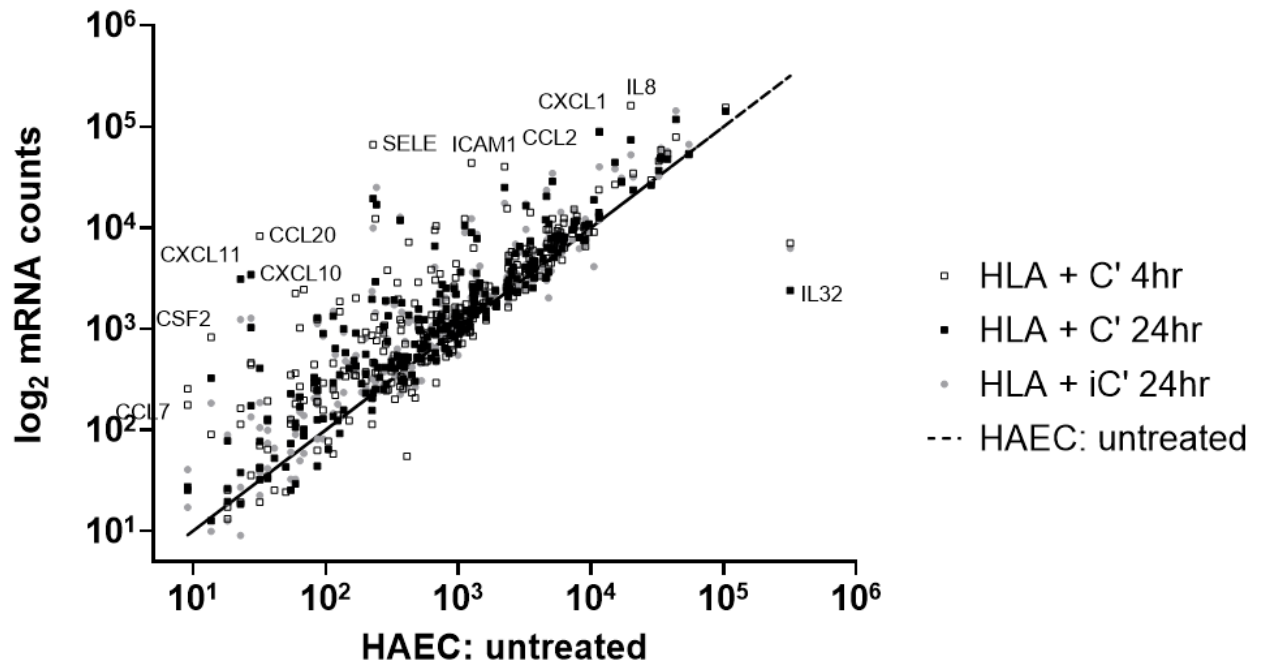

Figure S6. (continued)

**f**

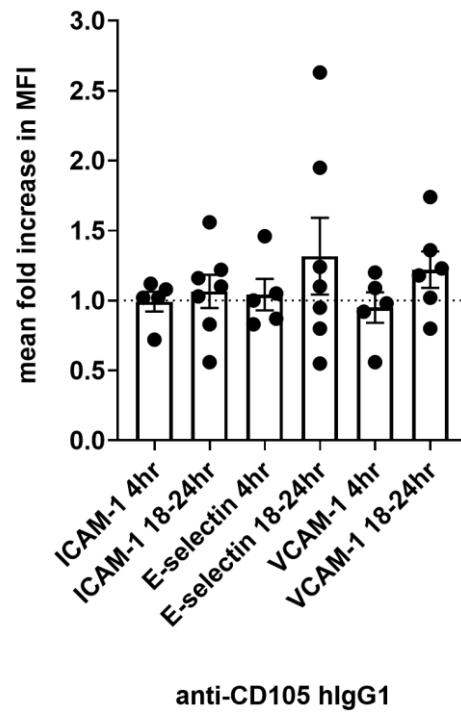

**Figure S6.** (continued)

**a**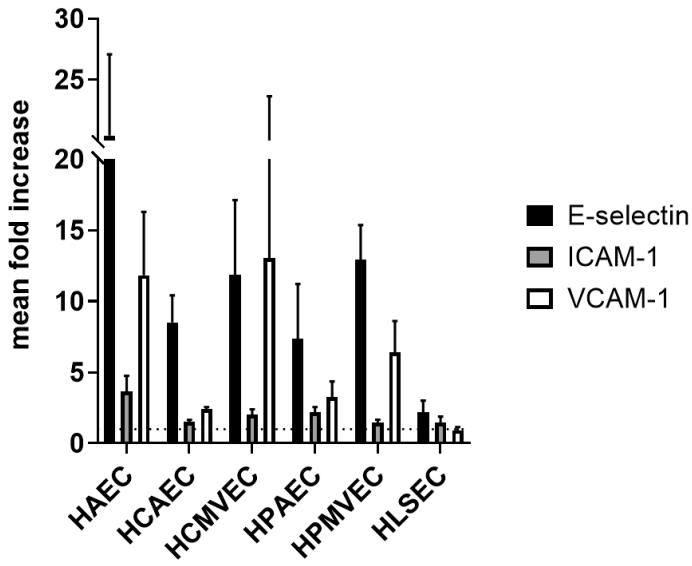**b**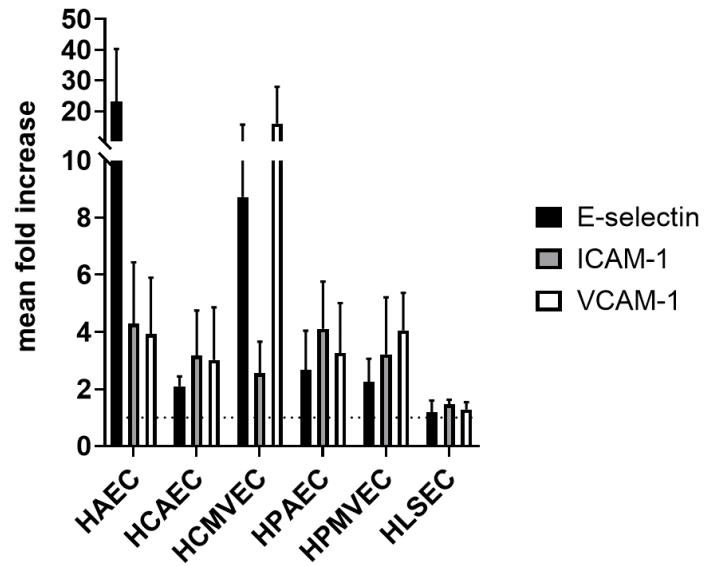**Figure S7.**



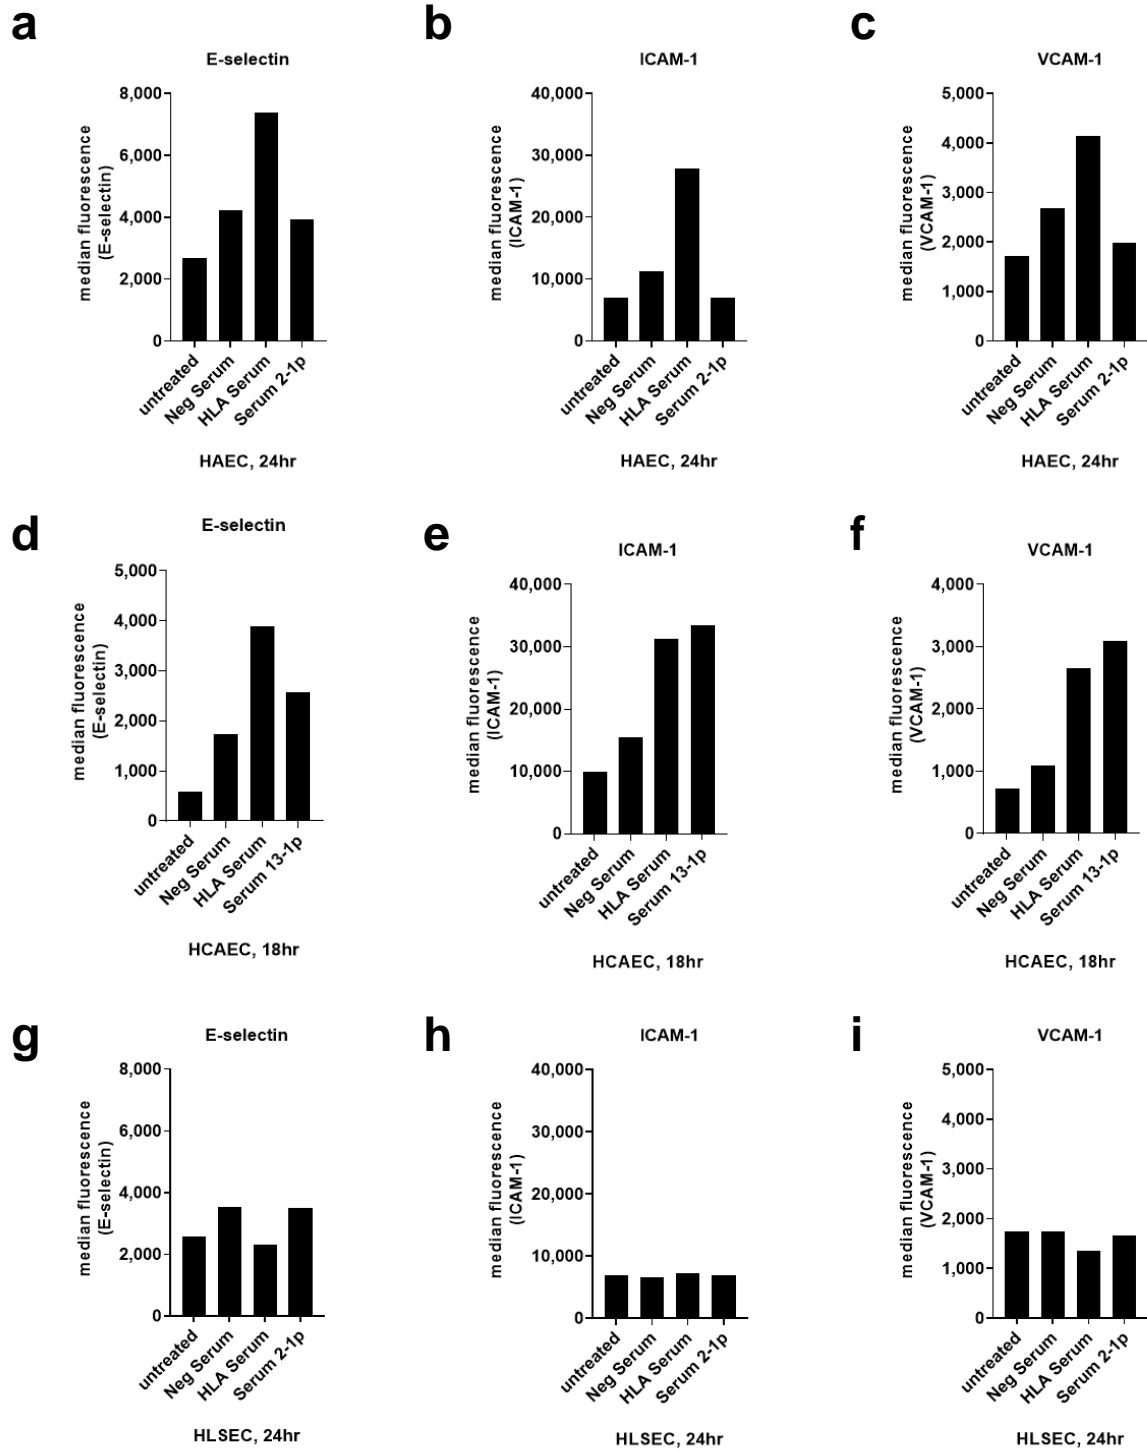

Figure S8.

## **Supplemental Tables**

### **Table S1**

List of human endothelial cell sources and donor demographics (where available) used in this study.

HAEC: human aortic endothelial cells; HCAEC: human coronary artery endothelial cells; HCMVEC: human cardiac microvascular endothelial cells; HPAEC: human pulmonary artery endothelial cells; HPMVEC: human pulmonary microvascular endothelial cells; HRGEC: human renal glomerular endothelial cells; HLSEC: human liver sinusoid endothelial cells

### **Table S2**

List of antibody reagents used for flow cytometry and endothelial cell stimulation in this study, including vendor, isotype and catalog numbers.

### **Table S3**

List of non-antibody reagents used in this study, including vendor and catalog numbers.

### **Table S4**

Flow cytometry panels used in this study, with fluorophores and antibody concentrations during staining.

### **Table S5**

List of public datasets of murine and human endothelial cells reanalyzed for the study, with GEO accession numbers (where available) and original data source URLs.

### **Table S6**

Data for significantly differentially expressed genes among untreated primary endothelial cells, compared with HLSEC.

**Table S1.**

| <b>Cell</b> | <b>Species</b> | <b>Type</b>  | <b>Origin</b>           | <b>Source</b>  | <b>Catalog #</b> | <b>Lot #</b>    | <b>Vendor Donor#</b> | <b>Internal ID</b> |
|-------------|----------------|--------------|-------------------------|----------------|------------------|-----------------|----------------------|--------------------|
| HMEC-1      | Human          | Immortalized | Dermal                  | ATCC           | CRL-3243         | 64334159        |                      |                    |
| HAEC        | Human          | Primary      | Aortic                  | Cell Biologics | H-6052           | M011218Y49HAM   | donor 1              | CB1                |
| HAEC        | Human          | Primary      | Aortic                  | Cell Biologics | H6052            | 021514F14/17    |                      | CB2/#5             |
| HAEC        | Human          | Primary      | Aortic                  | ScienCell      | 6100             | 4283            | 4/20/2009            | SC #6              |
| HAEC        | Human          | Primary      | Aortic                  | UCLA           | n/a              | n/a             |                      | 5555               |
| HAEC        | Human          | Primary      | Aortic                  | UCLA           | n/a              | n/a             |                      | 3F1153             |
| HCAEC       | Human          | Primary      | Coronary Artery         | Lonza          | CC-2585          | 0000547320      | 29790                | #1                 |
| HCAEC       | Human          | Primary      | Coronary Artery         | PromoCell      | C-12221          | 421Z006.3       |                      | #2                 |
| HCAEC       | Human          | Primary      | Coronary Artery         | PromoCell      | C-12221          | 411Z027.6       |                      | #3                 |
| HCAEC       | Human          | Primary      | Coronary Artery         | Cell Biologics | H-6093           | M021618         | donor 1              | #4                 |
| HCAEC       | Human          | Primary      | Coronary Artery         | Cell Biologics | H6093            | 021814M19/17    |                      | #5 CB              |
| HCAEC       | Human          | Primary      | Coronary Artery         | ScienCell      | 6020             | 14410           | 7/18/2014            | SC #6              |
| HCMVEC      | Human          | Primary      | Cardiac Microvascular   | Lonza          | CC-7030          | 0000473674      | 28760                | #1                 |
| HCMVEC      | Human          | Primary      | Cardiac Microvascular   | PromoCell      | C-12285          | 419Z014         |                      | #2                 |
| HCMVEC      | Human          | Primary      | Cardiac Microvascular   | PromoCell      | C-12285          | 423Z054         |                      | #3                 |
| HCMVEC      | Human          | Primary      | Cardiac Microvascular   | Cell Biologics | H-6024           | M07311Y49       | donor 1              | #4                 |
| HCMVEC      | Human          | Primary      | Cardiac Microvascular   | ScienCell      | 6000             | 15363           | 12/1/2014            | SC #6              |
| HPAEC       | Human          | Primary      | Pulmonary Artery        | Lonza          | CC-2530          | 0000598033      | 31116                | #1                 |
| HPAEC       | Human          | Primary      | Pulmonary Artery        | PromoCell      | C-12241          | 415Z031         |                      | #2                 |
| HPAEC       | Human          | Primary      | Pulmonary Artery        | PromoCell      | C-12241          | 418Z018         |                      | #3                 |
| HPAEC       | Human          | Primary      | Pulmonary Artery        | Cell Biologics | H-6059           | 122516BN/061917 | donor 2              | #4                 |
| HPAEC       | Human          | Primary      | Pulmonary Artery        | ScienCell      | 3100             | 4434            | 5/19/2009            | SC #6              |
| HPMVEC      | Human          | Primary      | Pulmonary Microvascular | Lonza          | CC-2527          | 0000547317      | 29774                | #1                 |
| HPMVEC      | Human          | Primary      | Pulmonary Microvascular | Lonza          | CC-2527          | 0000549135      | 29812                | #2                 |
| HPMVEC      | Human          | Primary      | Pulmonary Microvascular | PromoCell      | C-12281          | 421Z007.2       |                      | #3                 |
| HPMVEC      | Human          | Primary      | Pulmonary Microvascular | PromoCell      | C-12281          | 1071902.3       |                      | #4                 |
| HPMVEC      | Human          | Primary      | Pulmonary Microvascular | Cell Biologics | H-6011           | F19/091517      | donor 2              | #5                 |
| HPMVEC      | Human          | Primary      | Pulmonary Microvascular | Cell Biologics | H-6011           | F072517Y58      |                      | #6                 |
| HPMVEC      | Human          | Primary      | Pulmonary Microvascular | ScienCell      | 3000             | 15902           | 2/22/2015            | SC #7              |
| HRGEC       | Human          | Primary      | Renal Glomerular        | ScienCell      | 4000             | 15361           | 0003448              | #1                 |
| HRGEC       | Human          | Primary      | Renal Glomerular        | Cell Systems   | ACBR1128         |                 |                      | #2                 |
| HRGEC       | Human          | Primary      | Renal Glomerular        | Cell Biologics | H-6014G          | F19mmp6/120117  |                      | #4                 |
| HRGEC       | Human          | Primary      | Renal Glomerular        | Cell Biologics | H6014G           | 111613F19       |                      | #5                 |
| HRGEC       | Human          | Primary      | Renal Glomerular        | ScienCell      | 4000             | 25430           | 7/8/2018             | SC #6              |
| HLSEC       | Human          | Primary      | Liver Sinusoidal        | ScienCell      | 5000             | 15777           | 0003206              | #1                 |

|            |       |         |                         |                |          |            |           |           |
|------------|-------|---------|-------------------------|----------------|----------|------------|-----------|-----------|
| HLSEC      | Human | Primary | Liver Sinusoidal        | ScienCell      | 5000     | 16597      | 0003202   | #2        |
| HLSEC      | Human | Primary | Liver Sinusoidal        | Cell Systems   | ACBR1566 |            |           | #3        |
| HLSEC      | Human | Primary | Liver Sinusoidal        | Cell Biologics | H-6017   | M080117Y72 |           | #4        |
| HLSEC      | Human | Primary | Liver Sinusoidal        | Cell Biologics | H-6017   |            |           | #5        |
| HLSEC      | Human | Primary | Liver Sinusoidal        | ScienCell      | 5000     | 21045      | 1/26/2017 | SC #6     |
| HRGEC RNA  | Human | Primary | Renal Glomerular        | ScienCell      | 4005     |            |           | total RNA |
| HCMVEC RNA | Human | Primary | Cardiac Microvascular   | ScienCell      | 6005     |            |           | total RNA |
| HAEC RNA   | Human | Primary | Aortic                  | ScienCell      | 6105     |            |           | total RNA |
| HPAEC RNA  | Human | Primary | Pulmonary Artery        | ScienCell      | 3105     |            |           | total RNA |
| HPMVEC RNA | Human | Primary | Pulmonary Microvascular | ScienCell      | 3005     |            |           | total RNA |
| HHSEC RNA  | Human | Primary | Liver Sinusoidal        | ScienCell      | 5005     |            |           | total RNA |
| HCAEC RNA  | Human | Primary | Coronary Artery         | ScienCell      | 6025     |            |           | total RNA |

**Table S2.**

| <b>Target</b>                               | <b>Format</b>         | <b>Host</b>    | <b>Isotype</b>      | <b>Vendor</b>           | <b>City, State</b> | <b>Catalog #</b> |
|---------------------------------------------|-----------------------|----------------|---------------------|-------------------------|--------------------|------------------|
| ICAM-1                                      | AF488                 | mouse          | IgG1                | Biolegend               | San Diego, CA      | 322720           |
| E-selectin                                  | PE                    | mouse          | IgG2a               | Biolegend               | San Diego, CA      | 322606           |
| VCAM-1                                      | APC                   | mouse          | IgG1                | Biolegend               | San Diego, CA      | 305810           |
| BST2                                        | PE/Cy7                | mouse          | IgG1                | Biolegend               | San Diego, CA      | 348416           |
| hIgG                                        | BV510                 | rat            | IgG2a               | Biolegend               | San Diego, CA      | 410716           |
| HLA I                                       | BV510                 | mouse          | IgG2a               | Biolegend               | San Diego, CA      | 311436           |
| BST1                                        | AF594                 | mouse          | IgG1                | R&D Systems             | Minneapolis, MN    | FAB47361T-100UG  |
| Human SC5b-9 Neoantigen                     | no conjugate          | rabbit         | IgG                 | Complement Technology   | Tyler, Texas       | A227             |
| Rabbit IgG (H+L)                            | PE                    | goat           | F(ab') <sub>2</sub> | Jackson Immuno          | West Grove, PA     | 111-116-144      |
| CD11a                                       | FITC                  | mouse          | IgG1                | BD Biosciences          | San Jose, CA       | 555383           |
| CD56                                        | PE/Cy7                | mouse          | IgG1                | Biolegend               | San Diego, CA      | 318318           |
| CD14                                        | PerCP/Cy5.5           | mouse          | IgG1                | Biolegend               | San Diego, CA      | 325622           |
| CD19                                        | APC                   | mouse          | IgG1                | Biolegend               | San Diego, CA      | 392504           |
| CD3                                         | APC/H7 or APC/Fire750 | mouse          | IgG1                | Biolegend               | San Diego, CA      | 317352           |
| Endoglin (CD105)                            | BV510                 | mouse          | IgG1                | BD Biosciences          | San Jose, CA       | 563264           |
| HLA-DR                                      | BV421                 | mouse          | IgG2a               | Biolegend               | San Diego, CA      | 307636           |
| MCAM (CD146)                                | PerCP/Cy5.5           | mouse          | IgG2a               | Biolegend               | San Diego, CA      | 342013           |
| β-galactosidase                             | no conjugate          | chimeric human | IgG1                | Invivogen               | San Diego, CA      | bgal-mab1        |
| HLA I                                       | no conjugate          | chimeric human | IgG1                | Invivogen               | San Diego, CA      | hla-c1           |
| Endoglin (CD105)                            | no conjugate          | chimeric human | IgG1                | MediMabs                | Montreal, QC       | MM-0300          |
| MCAM (CD146)                                | no conjugate          | chimeric human | IgG1                | MediMabs                | Montreal, QC       | MM-0302          |
| HLA I                                       | no conjugate          | chimeric human | IgG1                | One Lambda/ThermoFisher | West Hills, CA     | n/a              |
| HLA I                                       | no conjugate          | chimeric human | IgG3                | One Lambda/ThermoFisher | West Hills, CA     | n/a              |
| HLA-A2/A68/A69 (clone SN607D8 no conjugate  |                       | human          | IgG1                | Leiden                  |                    | n/a              |
| HLA-A2/B57/B58 (clone SN230G6 no conjugate  |                       | human          | IgG1                | Leiden                  |                    | n/a              |
| HLA-A3/A11/A1/A36 (clone MUL4 no conjugate  |                       | human          | IgG1                | Leiden                  |                    | n/a              |
| HLA-A1/A3/A11/A36/A80 (clone M no conjugate |                       | human          | IgG1                | Leiden                  |                    | n/a              |
| HLA-Bw4 (clone MUS4H4rec) no conjugate      |                       | human          | IgG1                | Leiden                  |                    | n/a              |

**Table S3.**

| <b>Reagent</b>                                | <b>Vendor</b>         | <b>City, State</b>  | <b>Catalog #</b> |
|-----------------------------------------------|-----------------------|---------------------|------------------|
| Compensation Beads                            | BD Biosciences        | San Jose, CA        | 552843           |
| TNF $\alpha$ (recombinant, Humankine)         | Sigma Aldrich         | St. Louis, MO       | H8916-10UG       |
| IFN $\gamma$                                  | R&D Systems           | Minneapolis, MN     | 285IF-100/CF     |
| Recombinant human IL-4, CF                    | R&D Systems           | Minneapolis, MN     | 204-IL-010/CF    |
| Recombinant human IL-10, CF                   | R&D Systems           | Minneapolis, MN     | 217-IL-005/CF    |
| IL-1 $\beta$ , recombinant human              | Sigma-Aldrich         | St. Louis, MO       | I9401-5UG        |
| Normal Human Complement Serum                 | Complement Technology | Tyler, Texas        | NHS              |
| Human C1q-depleted Complement Serum           | Complement Technology | Tyler, Texas        | A300             |
| Human C3-depleted Complement Serum            | Complement Technology | Tyler, Texas        | A314             |
| Human CCL5/RANTES Quantikine ELISA Kit        | R&D Systems           | Minneapolis, MN     | DRN00B           |
| CXCL11/I-TAC DuoSet ELISA, 15 plate           | R&D Systems           | Minneapolis, MN     | DY672            |
| CXCL10/IP-10 DuoSet ELISA, 5 plate            | R&D Systems           | Minneapolis, MN     | DY266-05         |
| CCL20/MIP3a DuoSet ELISA, 5 plate             | R&D Systems           | Minneapolis, MN     | DY360-05         |
| DuoSet ELISA Ancillary Reagent Kit 2          | R&D Systems           | Minneapolis, MN     | DY008            |
| Ficoll-Paque Premium 1.078g/mL, GE Healthcare | Fisher                | Waltham, MA         | 45-001-751       |
| gelatin type B solution                       | Sigma-Aldrich         | St. Louis, MO       | G1393-100ML      |
| RLT Buffer                                    | Qiagen                | Germantown, MD      | 79216            |
| Endothelial Growth Medium                     | PromoCell             | Heidelberg, Germany | C-22020          |

**Table S4**

| <b>Panel</b> | <b>Target</b>                | <b>Format</b>         | <b>Dilution Factor</b> |
|--------------|------------------------------|-----------------------|------------------------|
| 1            | ICAM-1                       | AF488                 | 2.5:100                |
| 1            | E-selectin                   | PE                    | 5:100                  |
| 1            | VCAM-1                       | APC                   | 5:100                  |
| 1            | BST2                         | PE/Cy7                | 2.5:100                |
| 2            | ICAM-1                       | AF488                 | 2.5:100                |
| 2            | E-selectin                   | PE                    | 5:100                  |
| 2            | VCAM-1                       | APC                   | 5:100                  |
| 2            | BST2                         | PE/Cy7                | 2.5:100                |
| 2            | hIgG                         | BV510                 | 5:100                  |
| 3            | anti-Human SC5b-9 Neoantigen | no conjugate          | 1:200                  |
| 3            | anti-rabbit IgG (H+L)        | PE                    | 1:100                  |
| 3            | hIgG                         | BV510                 | 5:100                  |
| 4            | CD11a                        | FITC                  | 5:100                  |
| 4            | CD56                         | PE/Cy7                | 5:100                  |
| 4            | CD14                         | PerCP/Cy5.5           | 5:100                  |
| 4            | CD19                         | APC                   | 5:100                  |
| 4            | CD3                          | APC/H7 or APC/Fire750 | 5:100                  |
| 4            | Endoglin (CD105)             | BV510                 | 2.5:100                |
| 4            | HLA-DR                       | BV421                 | 5:100                  |

**Table S5.**

| <b>PMID</b> | <b>Species</b> | <b>Description</b>                                                                | <b>GEO Dataset</b> | <b>Available at</b>                                                                                                                     |
|-------------|----------------|-----------------------------------------------------------------------------------|--------------------|-----------------------------------------------------------------------------------------------------------------------------------------|
| 25561514    | mouse          | heart and lung bulk endothelial cells (Tie2+)                                     | GSE48209           | <a href="https://www.ncbi.nlm.nih.gov/geo/query/acc.cgi?acc=GSE48209">https://www.ncbi.nlm.nih.gov/geo/query/acc.cgi?acc=GSE48209</a>   |
| 30283141    | mouse          | scRNA-Seq of 20 mouse organs                                                      | GSE109774          | <a href="https://tabula-muris.ds.czbiohub.org/">https://tabula-muris.ds.czbiohub.org/</a>                                               |
| 32059779    | mouse          | scRNA-Seq of heart, kidney, lung and liver endothelial cells (CD31+)              |                    | <a href="https://endotheliomics.shinyapps.io/ec_atlas/">https://endotheliomics.shinyapps.io/ec_atlas/</a>                               |
| 30188322    | mouse          | kidney, lung and liver bulk endothelial cells                                     | GSE111839          | <a href="https://markfsabbagh.shinyapps.io/vectrdb/">https://markfsabbagh.shinyapps.io/vectrdb/</a>                                     |
| 31944177    | mouse          | heart and lung bulk endothelial cells (Cdh5+)                                     | GSE136848          | <a href="https://www.ncbi.nlm.nih.gov/geo/query/acc.cgi?acc=GSE136848">https://www.ncbi.nlm.nih.gov/geo/query/acc.cgi?acc=GSE136848</a> |
| 31712416    | mouse          | heart, kidney and liver bulk endothelial cells (Tek+)                             | GSE138629          | <a href="https://www.ncbi.nlm.nih.gov/geo/query/acc.cgi?acc=GSE138629">https://www.ncbi.nlm.nih.gov/geo/query/acc.cgi?acc=GSE138629</a> |
| 27582018    | human          | aortic (normal), hepatic sinusoid (normal); enriched and specific transcripts     |                    | <a href="http://angiogenes.uni-frankfurt.de/">http://angiogenes.uni-frankfurt.de/</a>                                                   |
| 24108462    | human          | hepatic artery (n=3); aortic (n=2); coronary artery (n=2); pulmonary artery (n=3) | GSE43475           | <a href="https://www.ncbi.nlm.nih.gov/geo/query/acc.cgi?acc=GSE43475">https://www.ncbi.nlm.nih.gov/geo/query/acc.cgi?acc=GSE43475</a>   |
| 30240741    | human          | fetal (3 month gestation) heart, kidney, lung and liver bulk endothelial cells    | GSE114607          | <a href="https://www.ncbi.nlm.nih.gov/geo/query/acc.cgi?acc=GSE114607">https://www.ncbi.nlm.nih.gov/geo/query/acc.cgi?acc=GSE114607</a> |
| 30795962    | human          | human cardiac allograft biopsies                                                  | GSE124897          | <a href="https://www.ncbi.nlm.nih.gov/geo/query/acc.cgi?acc=GSE124897">https://www.ncbi.nlm.nih.gov/geo/query/acc.cgi?acc=GSE124897</a> |



Table S6

| HAEC      | log2fc   | P-value  | HCAEC     | log2fc   | P-value  | HCMVEC   | log2fc   | P-value  | HPAEC      | log2fc | P-value  | HPMVEC    | log2fc   | P-value  | HRGEC   | log2fc   | P-value  |
|-----------|----------|----------|-----------|----------|----------|----------|----------|----------|------------|--------|----------|-----------|----------|----------|---------|----------|----------|
| THY1      | -6.64386 | 1.69E-11 | CD24      | 6.519951 | 7.26E-07 | PDGFRB   | -6.64386 | 5.69E-08 | THY1       | -9.15  | 2.21E-10 | TNFAIP6   | -4.05889 | 6.25E-06 | CEACAM8 | 5.249825 | 5.28E-08 |
| PDGFRB    | -6.64386 | 1.04E-08 | THY1      | -5.64386 | 1.10E-05 | C1R      | -4.32193 | 3.67E-06 | C7         | 4.31   | 7.33E-07 | THY1      | -4.32193 | 3.69E-05 | IDO1    | 5.219943 | 3.65E-07 |
| LCP2      | -4.64386 | 4.35E-06 | STAT4     | 4.739848 | 2.27E-05 | THY1     | -5.05889 | 4.80E-06 | ITLN1      | 4.01   | 1.08E-06 | PDGFRB    | -4.64386 | 6.84E-05 | LY96    | 4.450221 | 5.19E-07 |
| LIF       | -4.64386 | 4.90E-06 | TNFAIP6   | -4.32193 | 2.47E-05 | SPP1     | 4.83996  | 5.19E-06 | PDGFRB     | -6.04  | 2.36E-06 | SOC1      | -2.39593 | 9.69E-05 | IRAK2   | 4.169925 | 5.43E-07 |
| TNFAIP6   | -4.05889 | 6.54E-06 | C7        | 3.450221 | 0.000111 | C1S      | -5.64386 | 1.07E-05 | CFH        | 3.49   | 6.29E-06 | C1S       | -4.64386 | 0.000103 | B2M     | 3.439623 | 1.03E-06 |
| CX3CL1    | -4.64386 | 2.98E-05 | STAT1     | 3.31034  | 0.000116 | ITLN1    | 3.439623 | 1.52E-05 | C1R        | -3.87  | 3.32E-05 | CD34      | 3.710393 | 0.000258 | IL20    | 5.309976 | 1.24E-06 |
| C1R       | -3.47393 | 7.03E-05 | IFITM1    | -4.32193 | 0.000233 | TNFAIP6  | -3.8365  | 1.62E-05 | IL1B       | -5.52  | 0.000041 | C1R       | -3.05889 | 3.30E-04 | NT5E    | 3.140779 | 1.33E-06 |
| PPARG     | -2.39593 | 0.000165 | LCP2      | -4.32193 | 3.44E-04 | LIF      | -4.05889 | 4.36E-05 | STAT5A     | 2.02   | 7.49E-05 | IL1B      | -2.94342 | 0.00108  | FYN     | 2.920293 | 1.52E-06 |
| IFITM1    | -3.64386 | 0.000191 | LEF1      | 3.140779 | 0.000435 | LCP2     | -3.8365  | 1.22E-04 | CD80       | 3.04   | 0.000091 | CD36      | 3.459432 | 0.00217  | MYD88   | 2.929791 | 1.76E-06 |
| ITGAX     | -2.94342 | 0.00024  | EDNRB     | 2.589763 | 0.000451 | CD34     | 3.680324 | 0.000278 | KIR_Activa | 3.25   | 9.65E-05 | LIF       | -2.8365  | 2.87E-03 | TAP1    | 3.279471 | 2.48E-06 |
| VCAM1     | -3.8365  | 0.000413 | LIF       | -4.05889 | 4.91E-04 | IFITM1   | -3.32193 | 0.000625 | LCP2       | -4.28  | 1.16E-04 | ARG2      | 1.799087 | 0.00408  | IFIH1   | 3.469886 | 2.81E-06 |
| TNFRSF9   | -3.05889 | 0.00067  | CD34      | 4.079805 | 0.000517 | IL1R1    | -2.47393 | 0.000993 | STAT4      | 3.35   | 0.000532 | CCL7      | -1.18442 | 0.00497  | IL8     | 4.909773 | 2.85E-06 |
| SOC1      | -1.94342 | 0.000891 | C1S       | -5.05889 | 0.000663 | IL1B     | -2.64386 | 0.002    | STAT5B     | 1.58   | 0.000538 | STAT5A    | 1.292782 | 0.00553  | TGFBR2  | 3.279471 | 3.2E-06  |
| C1S       | -3.8365  | 0.00114  | LITAF     | -2.64386 | 0.00126  | TGFBI    | -2.47393 | 0.00295  | CASP2      | 1.87   | 0.000582 | TNFSF10   | 1.941106 | 0.00724  | CTSS    | 4.22033  | 3.23E-06 |
| CCL7      | -1.21759 | 0.00263  | SOC1      | -2.25154 | 0.00151  | CCL7     | -1.68966 | 0.00308  | MCL1       | 1.77   | 0.00077  | LITAF     | -1.8365  | 0.00755  | CCL5    | 5.219943 | 3.48E-06 |
| CCL20     | -3.47393 | 0.00303  | CCL7      | -3.47393 | 0.00163  | IL16     | 2.459432 | 0.00366  | ITLN2      | 2.82   | 0.000891 | TNFRSF11/ | 1.851999 | 0.00834  | STAT2   | 2.889474 | 3.72E-06 |
| IL7R      | -3.05889 | 0.00318  | IL1B      | -3.47393 | 0.00173  | SOC1     | -1.47393 | 0.0104   | CSF3R      | 2.83   | 0.000972 | TNFRSF9   | -2.32193 | 0.00847  | CD99    | 2.78031  | 3.99E-06 |
| ABC1      | 3.080658 | 0.00374  | TGFBI     | -2.8365  | 0.00349  | KIT      | 2.541019 | 0.0115   | IFNAR2     | 1.87   | 0.000983 | CD4       | -3.18442 | 0.0097   | TICAM1  | 3.49057  | 4.06E-06 |
| CFH       | 1.761285 | 0.00713  | CLU       | 2.78031  | 0.00393  | CD24     | 2.459432 | 0.0129   | STAT1      | 2.43   | 0.00103  | CD1D      | -2.64386 | 0.0141   | ICOSLG  | 3.600508 | 4.68E-06 |
| CD97      | -1.64386 | 0.00731  | CFH       | 2.100978 | 0.00796  | CCL20    | -2.39593 | 0.0133   | TAL1       | 2.28   | 0.00111  | IFITM1    | -2.25154 | 0.0158   | IFNGR1  | 2.599318 | 4.72E-06 |
| CCR1      | 2.620586 | 0.0086   | ARG2      | 1.929791 | 0.00798  | LITAF    | -1.68966 | 0.0133   | FCGR2B     | -2.37  | 0.00122  | BCL2L11   | 1.580145 | 0.017    | TRAF3   | 3.070389 | 4.85E-06 |
| FCGR2B    | -2.94342 | 0.00929  | PDGFRB    | -3.47393 | 8.02E-03 | CD4      | -3.05889 | 0.0134   | MAPKAPK    | 1.73   | 0.00135  | CD40      | 1.339137 | 0.0201   | CD46    | 2.970854 | 5.2E-06  |
| LITAF     | -1.68966 | 0.0097   | BCL2L11   | 2.080658 | 0.00802  | CEBPB    | -1.51457 | 0.0177   | ATG12      | 1.99   | 0.00135  | KLRG1     | 1.811471 | 0.0215   | IRAK1   | 2.819668 | 6.05E-06 |
| SERPING1  | -4.32193 | 0.0106   | ENTPD1    | 2.560715 | 0.00808  | PRDM1    | 1.778209 | 0.0202   | CCR1       | 2.49   | 0.00144  | CARD9     | -2.05889 | 0.0237   | IL4R    | 2.440952 | 6.36E-06 |
| IL1B      | -2       | 0.0108   | IDO1      | -3.8365  | 0.00881  | CFP      | 1.560715 | 0.025    | ARHGDI     | 1.82   | 0.00146  | IL6R      | 1.480265 | 0.0238   | CD81    | 2.739848 | 6.76E-06 |
| FKBP5     | -1.73697 | 0.0109   | IL5       | -2.8365  | 0.00903  | IL7R     | -2.32193 | 0.0254   | ILF3       | 1.68   | 0.00146  | NOTCH1    | 1.189034 | 0.0253   | CCL2    | 4.230357 | 6.99E-06 |
| STAT1     | 1.691534 | 0.0114   | CCL16     | 2.729009 | 0.0109   | CD19     | -2.39593 | 0.0274   | MAPK1      | 1.71   | 0.00155  | CEBPB     | -1.4344  | 0.0256   | RELA    | 3.289834 | 7.05E-06 |
| SELL      | 1.691534 | 0.0137   | TNFRSF11/ | 2.060047 | 0.0115   | STAT5A   | 1        | 0.0284   | CD1A       | 3.19   | 0.00167  | ITGAX     | -1.68966 | 0.026    | IFI35   | 3.200065 | 7.3E-06  |
| C1QB      | -2.73697 | 0.0151   | LILRB3    | -2.73697 | 0.0116   | VCAM1    | -2.25154 | 0.0317   | ABL1       | 1.57   | 0.00229  | CTSS      | 1.70044  | 0.0279   | PTK2    | 2.599318 | 7.36E-06 |
| CD3D      | -2.64386 | 0.0158   | MSR1      | 2.849999 | 0.0118   | BST2     | -1.88897 | 0.0326   | NOTCH1     | 1.73   | 0.00232  | SELL      | 1.521051 | 0.0327   | CSF2    | 3.609991 | 7.52E-06 |
| CEBPB     | -1.51457 | 0.0164   | CD247     | -2.39593 | 0.0123   | HLA-DPB1 | 1.422233 | 0.0337   | CD3EAP     | 1.87   | 0.00242  | CEACAM1   | 1.378512 | 0.0334   | MX1     | 4.82985  | 7.71E-06 |
| EGR1      | -2.05889 | 0.0166   | MS4A1     | -2.39593 | 0.0126   | CD1D     | -2.25154 | 0.0363   | PSMD7      | 1.66   | 0.00269  | TGFBI     | -1.73697 | 0.0337   | CD58    | 2.889474 | 8.25E-06 |
| CRADD     | -1.02915 | 0.0193   | TNFSF10   | 2.080658 | 0.0132   | CRADD    | -0.94342 | 0.0374   | C14orf166  | 1.66   | 0.003    | CRADD     | -0.94342 | 0.0338   | ITGB1   | 2.629939 | 8.44E-06 |
| CD4       | -2.73697 | 0.0196   | KLRF2     | -2.32193 | 0.014    | IL21R    | -1.94342 | 0.0424   | NFKB1      | 1.57   | 0.00308  | CD14      | -1.64386 | 0.0344   | PSMB5   | 2.629939 | 8.45E-06 |
| CARD9     | -2.12029 | 0.0209   | PTAFR     | -2.64386 | 0.014    | SELL     | 1.389567 | 0.047    | TLR3       | 1.88   | 0.00335  | TAL1      | 1.339137 | 0.0379   | MAP4K4  | 2.82985  | 8.79E-06 |
| CSF1      | -1.152   | 0.024    | TLR4      | 1.748461 | 0.0144   | FKBP5    | -1.32193 | 0.0496   | CD99       | 1.62   | 0.00337  | VCAM1     | -2.18442 | 0.0387   | ICAM1   | 3.82985  | 9.8E-06  |
| CD1D      | -2.32193 | 0.0255   | LAMP3     | 2.430285 | 0.0158   |          |          |          | TNFSF12    | 1.77   | 0.00369  | TNFRSF10( | 1.422233 | 0.04     | HLA-A   | 3.089159 | 1.01E-05 |
| NFATC1    | 1.238787 | 0.0274   | NOD1      | 1.400538 | 0.0171   |          |          |          | C1QBP      | 1.49   | 0.00377  | HLA-DPB1  | 1.350497 | 0.0432   | TOLLIP  | 3.249445 | 1.01E-05 |
| CD36      | -2.32193 | 0.0313   | TCF4      | 1.49057  | 0.0178   |          |          |          | TNFRSF1B   | 2.29   | 0.00383  | KIT       | 2        | 0.0457   | ATG5    | 2.408712 | 1.04E-05 |
| CD8B      | -2.39593 | 0.0321   | TAL1      | 1.778209 | 0.0194   |          |          |          | PSMC2      | 1.57   | 0.00407  |           |          |          | MAPK1   | 2.531069 | 1.09E-05 |
| TNFRSF11/ | 1.378512 | 0.0381   | C8B       | -1.8365  | 0.0214   |          |          |          | ITGAE      | 1.53   | 0.00435  |           |          |          | NFKB1   | 2.510962 | 1.11E-05 |
| NFIL3     | -1.05889 | 0.0416   | CD1D      | -2.94342 | 0.0228   |          |          |          | NFATC1     | 1.75   | 0.0044   |           |          |          | BCAP31  | 2.70044  | 1.24E-05 |
| PSMB9     | -1.05889 | 0.0443   | IRF8      | -3.05889 | 0.024    |          |          |          | PSMB7      | 1.54   | 0.00445  |           |          |          | NFATC1  | 2.910733 | 1.24E-05 |
|           |          |          | HLA-DRA   | 0.678072 | 0.0242   |          |          |          | SRC        | 1.69   | 0.00469  |           |          |          | CASP3   | 2.980025 | 1.25E-05 |
|           |          |          | IFNB1     | -1.94342 | 0.0255   |          |          |          | CCL23      | 2.82   | 0.00478  |           |          |          | ICAM3   | 2.950468 | 1.35E-05 |
|           |          |          | TNFRSF13( | -2.12029 | 0.0261   |          |          |          | STAT3      | 1.44   | 0.00479  |           |          |          | BCL10   | 2.729009 | 1.41E-05 |
|           |          |          | IL27      | -2.47393 | 0.0269   |          |          |          | PSMB5      | 1.52   | 0.00494  |           |          |          | ARHGDI  | 2.639232 | 1.45E-05 |
|           |          |          | NCR1      | 2.49057  | 0.0273   |          |          |          |            |        |          |           |          |          | TLR3    | 2.989139 | 1.45E-05 |
|           |          |          | CD70      | -1.68966 | 0.0275   |          |          |          |            |        |          |           |          |          | ABL1    | 2.381283 | 1.48E-05 |
|           |          |          | CD4       | -3.47393 | 0.0284   |          |          |          |            |        |          |           |          |          | TAPBP   | 2.939227 | 1.53E-05 |
|           |          |          | CD3D      | -1.78588 | 0.0302   |          |          |          |            |        |          |           |          |          | PSMB7   | 2.521051 | 1.62E-05 |

|          |          |        |
|----------|----------|--------|
| CD36     | 2.769772 | 0.0305 |
| IKZF3    | -2.32193 | 0.0324 |
| IL2      | -2.32193 | 0.0339 |
| CD74     | 2.269033 | 0.0349 |
| CD14     | -1.8365  | 0.0354 |
| CARD9    | -2.39593 | 0.0366 |
| STAT5A   | 1.097611 | 0.0392 |
| CD2      | -2.12029 | 0.0393 |
| TNFRSF9  | -2.05889 | 0.0421 |
| LILRB1   | -1.88897 | 0.0461 |
| TNFRSF1B | 1.718088 | 0.0466 |
| IL7R     | -2.39593 | 0.0477 |

|          |          |          |
|----------|----------|----------|
| TNFRSF14 | 3.190615 | 1.62E-05 |
| PML      | 3.099295 | 1.71E-05 |
| SMAD3    | 2.799087 | 1.73E-05 |
| IFNAR2   | 2.570463 | 1.76E-05 |
| CD55     | 2.680324 | 0.000018 |
| IRF7     | 3.629939 | 1.88E-05 |
| STAT6    | 2.910733 | 1.89E-05 |
| CD164    | 2.669027 | 1.93E-05 |
| PRKCD    | 2.580145 | 1.95E-05 |
| TAP2     | 2.989139 | 1.97E-05 |
| NCAM1    | 3.980025 | 0.00002  |
| RAF1     | 2.381283 | 2.02E-05 |
| SRC      | 2.729009 | 2.11E-05 |
| IFNAR1   | 2.950468 | 2.14E-05 |
| ITGAE    | 2.430285 | 2.22E-05 |
| TRAF2    | 2.620586 | 2.23E-05 |
| LITAF    | -3.32193 | 2.24E-05 |
| APP      | 2.799087 | 2.47E-05 |
| GPI      | 2.709291 | 2.57E-05 |
| MAPKAPK2 | 2.389567 | 2.68E-05 |
| TP53     | 2.22033  | 2.79E-05 |
| IL18R1   | 3.22033  | 0.000028 |
| PSMC2    | 2.430285 | 2.99E-05 |
| NFKBIA   | 2.500802 | 3.02E-05 |
| ITGA5    | 2.639232 | 3.11E-05 |
| ATG12    | 2.709291 | 3.19E-05 |
| PYCARD   | 2.580145 | 3.27E-05 |
| BAX      | 2.31904  | 3.28E-05 |
| NFKB2    | 2.669027 | 3.29E-05 |
| IKBK     | 2.211012 | 3.45E-05 |
| UBE2L3   | 2.179511 | 3.45E-05 |
| TNFSF12  | 2.689299 | 3.46E-05 |
| HLA-B    | 3.350497 | 3.84E-05 |
| IL6ST    | 2.111031 | 3.95E-05 |
| TYK2     | 2.370164 | 4.22E-05 |
| TBK1     | 2.250962 | 4.49E-05 |
| CD9      | 3.600508 | 4.87E-05 |
| PDGFRB   | -5.05889 | 5.04E-05 |
| MIF      | 2.550901 | 5.11E-05 |
| PDCD1LG2 | 2.85997  | 5.12E-05 |
| BST1     | 3.049631 | 5.22E-05 |
| CTNNB1   | 2.169925 | 5.22E-05 |
| CCRL1    | 4.609991 | 5.36E-05 |
| RELB     | 2.550901 | 5.53E-05 |
| IGF2R    | 2.729009 | 5.56E-05 |
| CD59     | 2.939227 | 5.63E-05 |
| FCGRT    | 2.82985  | 5.83E-05 |
| ETS1     | 2.49057  | 5.92E-05 |
| TMEM173  | 3.129283 | 5.92E-05 |
| PSMD7    | 2.330558 | 6.31E-05 |
| IRAK4    | 2.140779 | 6.55E-05 |
| MAP4K2   | 2.809414 | 6.59E-05 |
| SKI      | 2.330558 | 6.64E-05 |

|           |          |          |
|-----------|----------|----------|
| TRAF6     | 2.85997  | 6.68E-05 |
| IL13RA1   | 2.269033 | 6.77E-05 |
| PSMB10    | 2.370164 | 6.98E-05 |
| IKKB      | 2.879706 | 7.37E-05 |
| IRF1      | 2.280956 | 8.03E-05 |
| PTGER4    | 3.64039  | 8.04E-05 |
| STAT3     | 2.130931 | 8.05E-05 |
| IL12B     | 3.389567 | 8.09E-05 |
| MAPK14    | 2.250962 | 8.16E-05 |
| CASP2     | 2.189034 | 8.34E-05 |
| TAL1      | 2.83996  | 8.41E-05 |
| PSMB8     | 2.469886 | 8.45E-05 |
| THY1      | -4.32193 | 8.49E-05 |
| CXCL1     | 3.350497 | 9.01E-05 |
| STAT5B    | 1.819668 | 9.44E-05 |
| TIRAP     | 2.639232 | 9.53E-05 |
| SMAD5     | 2.15056  | 9.62E-05 |
| CDH5      | 2.611172 | 0.0001   |
| ZEB1      | 2.469886 | 0.000116 |
| HLA-C     | 3.529821 | 0.000119 |
| CHUK      | 2.211012 | 0.000122 |
| LTBR      | 2.480265 | 0.000123 |
| CD3EAP    | 2.459432 | 0.000129 |
| C1R       | -3.47393 | 1.30E-04 |
| MCL1      | 2.060047 | 0.000132 |
| JAK1      | 2.49057  | 0.000133 |
| CFB       | 3.769772 | 0.000139 |
| IL12A     | 3.620586 | 0.000146 |
| CCL24     | 3.099295 | 0.000151 |
| TNFRSF10C | 2.920293 | 0.000152 |
| PECAM1    | 2.709291 | 0.000164 |
| HLA-DRB1  | 3.109361 | 0.000164 |
| CTSC      | 2.611172 | 0.000166 |
| CCL4      | 3.140779 | 0.000169 |
| TCF4      | 2.229588 | 0.000171 |
| CCND3     | 2.70044  | 0.000174 |
| STAT1     | 2.83996  | 0.000174 |
| PLAU      | 3.64039  | 0.000183 |
| CD40      | 2.389567 | 0.000185 |
| PDCD2     | 2.358959 | 0.000196 |
| PTPN2     | 1.978196 | 0.000197 |
| PSMB9     | 2.269033 | 0.000205 |
| IRF3      | 2.531069 | 0.000222 |
| EOMES     | 3.119356 | 0.000224 |
| IKBKE     | 2.510962 | 0.000229 |
| ILF3      | 2        | 0.00023  |
| IL1A      | 3.64039  | 0.000272 |
| IFI16     | 2.289834 | 0.000276 |
| TGFBR1    | 2.260026 | 0.000284 |
| DEFB1     | 3.179511 | 0.000299 |
| TLR4      | 2.400538 | 0.00032  |
| JAK2      | 1.910733 | 0.000322 |
| CCL26     | -5.05889 | 0.000357 |

|           |          |          |
|-----------|----------|----------|
| HRAS      | 2.179511 | 0.000364 |
| S1PR1     | 2.729009 | 0.000365 |
| IL2RB     | 3.229588 | 0.000365 |
| LILRA3    | 2.849999 | 0.000367 |
| BCL3      | 2.130931 | 0.000368 |
| IFIT2     | 3.580145 | 0.000394 |
| CD276     | 2.469886 | 0.000396 |
| GBP1      | 2.419539 | 0.000396 |
| ATG16L1   | 2.02148  | 0.00042  |
| CD82      | 2.869871 | 0.000435 |
| LTF       | -3.05889 | 0.000439 |
| CDKN1A    | 2.589763 | 0.000441 |
| C14orf166 | 2.01078  | 0.000453 |
| CCRL2     | 3.340562 | 0.000476 |
| TFRC      | 2.31034  | 0.000479 |
| CX3CL1    | 3.83996  | 4.92E-04 |
| NOD2      | 2.560715 | 0.000495 |
| C8B       | -3.05889 | 0.00051  |
| TNFAIP6   | -3.18442 | 5.32E-04 |
| IKBKAP    | 1.918386 | 0.000537 |
| ATG7      | 1.769772 | 0.000544 |
| C1QBP     | 1.819668 | 0.000549 |
| ABCB1     | 4.040016 | 0.000552 |
| NFKBIZ    | 2.090853 | 0.000574 |
| POU2F2    | 3.920293 | 0.000578 |
| NOTCH2    | 2.669027 | 0.000596 |
| KCNJ2     | 3.039138 | 0.000597 |
| ICAM2     | 3.519793 | 0.000623 |
| IL6       | 2.750607 | 0.000649 |
| MAPK11    | 2.869871 | 0.000672 |
| CEACAM1   | 2.400538 | 0.000687 |
| C1QB      | -3.05889 | 0.000741 |
| ITGAM     | 3.330558 | 0.000746 |
| TNFSF13B  | 3.109361 | 0.000795 |
| CD83      | 2.750607 | 0.000828 |
| TRAF5     | 1.899176 | 0.000838 |
| ITGA6     | 2.639232 | 0.000843 |
| ADA       | 1.459432 | 0.000849 |
| TNFAIP3   | 2.350497 | 0.000871 |
| NFATC3    | 1.618239 | 0.000887 |
| BST2      | 3.209453 | 0.0009   |
| CD2       | -2.94342 | 0.000965 |
| KLRG1     | 2.769772 | 0.00113  |
| CD79A     | 2.920293 | 0.00118  |
| B3GAT1    | -2.47393 | 0.00123  |
| CXCR1     | -2.8365  | 0.00125  |
| CCR10     | 3.260026 | 0.00128  |
| IL5       | -2.8365  | 0.00134  |
| NOTCH1    | 1.831877 | 0.00137  |
| CYBB      | -3.05889 | 0.00137  |
| TLR2      | 2.659925 | 0.00138  |
| CD44      | 3.529821 | 0.00139  |
| IL29      | 3.300124 | 0.00141  |

|          |          |         |
|----------|----------|---------|
| CD3D     | -2.39593 | 0.00149 |
| HAMP     | -2.73697 | 0.00149 |
| CD4      | -5.05889 | 0.00158 |
| NFATC2   | 2.350497 | 0.00163 |
| MME      | 2.950468 | 0.00163 |
| CSF1     | 1.769772 | 0.00165 |
| BCL6     | 1.851999 | 0.00169 |
| IL17F    | 3.279471 | 0.00173 |
| RUNX1    | 2.280956 | 0.00174 |
| PLA2G2E  | -2.64386 | 0.00175 |
| NOD1     | 1.678072 | 0.00178 |
| CD8B     | -2.73697 | 0.00178 |
| KLRF2    | -2.64386 | 0.0018  |
| LILRB3   | -2.73697 | 0.00183 |
| IL15     | 2.419539 | 0.0019  |
| LTB4R    | 2.22033  | 0.00192 |
| PLAUR    | 2.298658 | 0.00193 |
| LGALS3   | 1.929791 | 0.00197 |
| CASP1    | 1.831877 | 0.002   |
| IRF8     | -4.64386 | 0.00201 |
| KLRK1    | -2.8365  | 0.00201 |
| BCL2     | 2.31904  | 0.00206 |
| ZAP70    | -2.73697 | 0.00215 |
| IL10     | -2.05889 | 0.00217 |
| CFI      | 2.550901 | 0.00221 |
| CD19     | -3.32193 | 0.00223 |
| IL9      | -2.73697 | 0.00233 |
| RORC     | 2.950468 | 0.00242 |
| KLRF1    | -2.64386 | 0.00245 |
| CD14     | -3.05889 | 0.00253 |
| CSF2RB   | 3.15056  | 0.00264 |
| ATG10    | 1.580145 | 0.00267 |
| IL1RL1   | 5.910013 | 0.00268 |
| CSF1R    | -2.64386 | 0.00269 |
| CD34     | 3.070389 | 0.0027  |
| BLNK     | -2.55639 | 0.00276 |
| NFIL3    | 1.709291 | 0.00282 |
| TRAF1    | 5.130107 | 0.00289 |
| TRAF4    | 1.819668 | 0.00321 |
| CD247    | -2.25154 | 0.00327 |
| CD45RA   | -2.64386 | 0.00347 |
| EBI3     | 2.260026 | 0.0038  |
| CFH      | 2.049631 | 0.00387 |
| GZMK     | -2.55639 | 0.00418 |
| HLA-DQB1 | -2.64386 | 0.00424 |
| PRF1     | -2.55639 | 0.00426 |
| TGFB1    | 1.641546 | 0.00472 |
| ATM      | 2.580145 | 0.00476 |
| FCGR2B   | -3.05889 | 0.00486 |
| MS4A1    | -2.8365  | 0.00497 |
| MARCO    | -2.12029 | 0.00503 |
| FCGR1A/B | -2.39593 | 0.00518 |
| TNF      | 2.459432 | 0.00519 |

|           |          |         |
|-----------|----------|---------|
| LILRB1    | -2.32193 | 0.00526 |
| CXCL2     | 2.430285 | 0.00595 |
| KIR3DL1   | -2.47393 | 0.00614 |
| PTAFR     | -2.32193 | 0.00618 |
| IL7       | -2.47393 | 0.00652 |
| GFI1      | 1.899176 | 0.00658 |
| PTGS2     | 2.790772 | 0.00671 |
| ITGAX     | -2.8365  | 0.00686 |
| CD36      | -3.18442 | 0.00696 |
| CD45RO    | -2.64386 | 0.007   |
| CCL20     | 2.521051 | 0.00748 |
| TNFRSF13F | -2.39593 | 0.00772 |
| IKZF3     | -2.39593 | 0.00788 |
| STAT5A    | 1.280956 | 0.00796 |
| FN1       | 1.632268 | 0.00807 |
| SLAMF1    | -2.47393 | 0.00874 |
| PLA2G2A   | -2.8365  | 0.00889 |
| CCL19     | -1.68966 | 0.00897 |
| XBP1      | 1.378512 | 0.00903 |
| CD274     | 1.641546 | 0.00904 |
| TNFSF15   | 6.179909 | 0.00938 |
| RARRES3   | 2        | 0.00959 |
| TLR1      | 2.189034 | 0.00997 |
| CCL18     | -2.18442 | 0.0101  |
| CCR7      | -2.25154 | 0.0106  |
| ARG2      | 1.641546 | 0.0109  |
| AHR       | 1.298658 | 0.0111  |
| IFNB1     | -2.55639 | 0.0115  |
| IL2RA     | -2.47393 | 0.013   |
| CD1D      | -3.47393 | 0.0132  |
| MALT1     | 1.378512 | 0.015   |
| FCGR2A    | -2.12029 | 0.0155  |
| IL27      | -2.39593 | 0.0164  |
| FAS       | 1.778209 | 0.0166  |
| SELE      | 4.550285 | 0.0175  |
| ITLN2     | -2.94342 | 0.0188  |
| IL21      | -2.05889 | 0.0192  |
| TNFSF4    | 2.121015 | 0.0206  |
| PDGFB     | 2.080658 | 0.0207  |
| IL2       | -1.94342 | 0.0216  |
| S100A8    | -2.05889 | 0.0221  |
| FADD      | 0.879706 | 0.0226  |
| IL23R     | -1.73697 | 0.0232  |
| KIT       | 2.358959 | 0.0233  |
| IL22RA2   | -2       | 0.024   |
| ITLN1     | -2.47393 | 0.0243  |
| TNFSF10   | 1.669027 | 0.0245  |
| CCL7      | -3.8365  | 0.0245  |
| DEFB4A    | -2.25154 | 0.0246  |
| CASP8     | 0.9855   | 0.0249  |
| CFD       | -2.94342 | 0.0255  |
| ICAM5     | 1.871844 | 0.026   |
| PRDM1     | 1.739848 | 0.0269  |

|          |          |        |
|----------|----------|--------|
| IL1B     | -1.8365  | 0.0277 |
| MASP1    | -2.55639 | 0.0287 |
| IL17B    | -2.32193 | 0.0293 |
| AICDA    | 1.978196 | 0.0305 |
| CD209    | -2.47393 | 0.0327 |
| TIGIT    | -3.47393 | 0.034  |
| FCGR2A/C | -3.8365  | 0.036  |
| LEF1     | -3.05889 | 0.039  |
| HLA-DPA1 | 1.778209 | 0.0391 |
| KLRB1    | -1.59946 | 0.0393 |
| DPP4     | 1.819668 | 0.0397 |
| CR2      | -1.73697 | 0.0411 |
| CIITA    | -1.94342 | 0.0412 |
| KLRC1    | 2.090853 | 0.0428 |
| IL32     | 3.060047 | 0.0429 |
| CD74     | 1.948601 | 0.044  |
| NLRP3    | -1.94342 | 0.0443 |
| XCL1     | -3.18442 | 0.0443 |
| BCL2L11  | 1.350497 | 0.0479 |
| CD160    | 2.130931 | 0.0487 |
| CXCL10   | 3.430285 | 0.0499 |

**Table S7. Angiogenes, enriched Heart not Liver**

| Accession  | Name         | Description                                                                        | Biotype    | Tax ID | Location   | # of Detections |
|------------|--------------|------------------------------------------------------------------------------------|------------|--------|------------|-----------------|
| ENST000001 | AAAS-001     | achalasia, adrenocortical insufficiency, alacrimia                                 | protein_co | 9606   | 12:533074  | 40              |
| ENST000001 | AARS2-001    | alanyl-tRNA synthetase 2, mitochondrial                                            | protein_co | 9606   | 6:4429965  | 41              |
| ENST000001 | AASDH-001    | aminoadipate-semialdehyde dehydrogenase                                            | protein_co | 9606   | 4:5633829  | 24              |
| ENST000001 | ABCC10-007   | ATP-binding cassette, sub-family C (CFTR/MRP), member 10                           | protein_co | 9606   | 6:4343175  | 6               |
| ENST000001 | ABCC6-001    | ATP-binding cassette, sub-family C (CFTR/MRP), member 6                            | protein_co | 9606   | 16:161489  | 11              |
| ENST000001 | ABCF2-003    | ATP-binding cassette, sub-family F (GCN20), member 2                               | protein_co | 9606   | 7:1512078  | 21              |
| ENST000001 | ABCG2-001    | ATP-binding cassette, sub-family G (WHITE), member 2 (Junior blood group)          | protein_co | 9606   | 4:8809026  | 30              |
| ENST000001 | ABHD11-001   | abhydrolase domain containing 11                                                   | protein_co | 9606   | 7:7373609  | 25              |
| ENST000001 | ABHD8-001    | abhydrolase domain containing 8                                                    | protein_co | 9606   | 19:172921  | 33              |
| ENST000001 | ABI3-001     | ABI family, member 3                                                               | protein_co | 9606   | 17:492102  | 43              |
| ENST000001 | ACADS-001    | acyl-CoA dehydrogenase, C-2 to C-3 short chain                                     | protein_co | 9606   | 12:120725  | 43              |
| ENST000001 | ACO2-001     | aconitase 2, mitochondrial                                                         | protein_co | 9606   | 22:414691  | 42              |
| ENST000001 | ACOT2-001    | acyl-CoA thioesterase 2                                                            | protein_co | 9606   | 14:735690  | 43              |
| ENST000001 | ACOT8-001    | acyl-CoA thioesterase 8                                                            | protein_co | 9606   | 20:458417  | 40              |
| ENST000001 | ACPS-002     | acid phosphatase 5, tartrate resistant                                             | protein_co | 9606   | 19:115746  | 4               |
| ENST000001 | ACTA2-001    | actin, alpha 2, smooth muscle, aorta                                               | protein_co | 9606   | 10:889350  | 43              |
| ENST000001 | ACTN1-001    | actinin, alpha 1                                                                   | protein_co | 9606   | 14:688741  | 39              |
| ENST000001 | ACVR2A-001   | activin A receptor, type IIA                                                       | protein_co | 9606   | 2:1478445  | 19              |
| ENST000001 | ADCK1-001    | aarF domain containing kinase 1                                                    | protein_co | 9606   | 14:778000  | 38              |
| ENST000001 | ADCK2-001    | aarF domain containing kinase 2                                                    | protein_co | 9606   | 7:1406731  | 25              |
| ENST000001 | ADSL-017     | adenylosuccinate lyase                                                             | protein_co | 9606   | 22:403465  | 30              |
| ENST000001 | AEBP1-001    | AE binding protein 1                                                               | protein_co | 9606   | 7:4410436  | 41              |
| ENST000001 | AES-001      | amino-terminal enhancer of split                                                   | protein_co | 9606   | 19:305291  | 5               |
| ENST000001 | AGO2-001     | argonaute RISC catalytic component 2                                               | protein_co | 9606   | 8:1405311  | 22              |
| ENST000001 | AGO3-002     | argonaute RISC catalytic component 3                                               | protein_co | 9606   | 1:3593125  | 36              |
| ENST000001 | AHCY-002     | adenosylhomocysteinase                                                             | protein_co | 9606   | 20:342802  | 44              |
| ENST000001 | AHR-002      | aryl hydrocarbon receptor                                                          | protein_co | 9606   | 7:1729862  | 41              |
| ENST000001 | AHSA1-001    | AHA1, activator of heat shock 90kDa protein ATPase homolog 1 (yeast)               | protein_co | 9606   | 14:774580  | 40              |
| ENST000001 | AIF1L-001    | allograft inflammatory factor 1-like                                               | protein_co | 9606   | 9:1310965  | 37              |
| ENST000001 | AIMP2-001    | aminoacyl tRNA synthetase complex-interacting multifunctional protein 2            | protein_co | 9606   | 7:6009245  | 26              |
| ENST000001 | AK6-003      | adenylate kinase 6                                                                 | protein_co | 9606   | 5:6936474  | 41              |
| ENST000001 | AKAP10-001   | A kinase (PRKA) anchor protein 10                                                  | protein_co | 9606   | 17:199043  | 33              |
| ENST000001 | AKAP11-001   | A kinase (PRKA) anchor protein 11                                                  | protein_co | 9606   | 13:422721  | 41              |
| ENST000001 | AKAP3-201    | A kinase (PRKA) anchor protein 3                                                   | protein_co | 9606   | 12:461550  | 7               |
| ENST000001 | AKR7A2-001   | aldo-keto reductase family 7, member A2 (aflatoxin aldehyde reductase)             | protein_co | 9606   | 1:1930396  | 44              |
| ENST000001 | ALDH3A1-001  | aldehyde dehydrogenase 3 family, member A1                                         | protein_co | 9606   | 17:197379  | 4               |
| ENST000001 | ALDH3A2-001  | aldehyde dehydrogenase 3 family, member A2                                         | protein_co | 9606   | 17:196485  | 6               |
| ENST000001 | ALDOC-001    | aldolase C, fructose-bisphosphate                                                  | protein_co | 9606   | 17:285731  | 13              |
| ENST000001 | ALG2-001     | ALG2, alpha-1,3/1,6-mannosyltransferase                                            | nonsense_  | 9606   | 9:9921642  | 21              |
| ENST000001 | ALG5-001     | ALG5, dolichyl-phosphate beta-glucosyltransferase                                  | protein_co | 9606   | 13:369498  | 44              |
| ENST000001 | ALPK1-001    | alpha-kinase 1                                                                     | protein_co | 9606   | 4:1122973  | 15              |
| ENST000001 | ANKRD16-002  | ankyrin repeat domain 16                                                           | protein_co | 9606   | 10:587812  | 14              |
| ENST000001 | AP4S1-001    | adaptor-related protein complex 4, sigma 1 subunit                                 | protein_co | 9606   | 14:310256  | 11              |
| ENST000001 | AP5S1-201    | adaptor-related protein complex 5, sigma 1 subunit                                 | protein_co | 9606   | 20:382052  | 5               |
| ENST000001 | APEX1-001    | APEX nuclease (multifunctional DNA repair enzyme) 1                                | protein_co | 9606   | 14:204551  | 26              |
| ENST000001 | APLP1-002    | amyloid beta (A4) precursor-like protein 1                                         | protein_co | 9606   | 19:358684  | 12              |
| ENST000001 | APMAP-001    | adipocyte plasma membrane associated protein                                       | protein_co | 9606   | 20:249629  | 42              |
| ENST000001 | APOB-001     | apolipoprotein B                                                                   | protein_co | 9606   | 2:2100142  | 9               |
| ENST000001 | APOBEC3D-001 | apolipoprotein B mRNA editing enzyme, catalytic polypeptide-like 3D                | protein_co | 9606   | 22:390211  | 8               |
| ENST000001 | APPBP2-001   | amyloid beta precursor protein (cytoplasmic tail) binding protein 2                | protein_co | 9606   | 17:604431  | 35              |
| ENST000001 | ARHGAP33-201 | Rho GTPase activating protein 33                                                   | protein_co | 9606   | 19:357756  | 5               |
| ENST000001 | ARHGDIB-001  | Rho GDP dissociation inhibitor (GDI) beta                                          | protein_co | 9606   | 12:149420  | 42              |
| ENST000001 | ARHGEF5-001  | Rho guanine nucleotide exchange factor (GEF) 5                                     | protein_co | 9606   | 7:1443553  | 9               |
| ENST000001 | ARL2BP-001   | ADP-ribosylation factor-like 2 binding protein                                     | protein_co | 9606   | 16:5272450 | 25              |
| ENST000001 | ARMC2-004    | armadillo repeat containing 2                                                      | protein_co | 9606   | 6:1088486  | 22              |
| ENST000001 | ARMCX5-004   | armadillo repeat containing, X-linked 5                                            | protein_co | 9606   | X:1025991  | 35              |
| ENST000001 | ARSA-001     | arylsulfatase A                                                                    | protein_co | 9606   | 22:506250  | 34              |
| ENST000001 | ASIC2-001    | acid-sensing (proton-gated) ion channel 2                                          | protein_co | 9606   | 17:330130  | 7               |
| ENST000001 | ASPHD2-001   | aspartate beta-hydroxylase domain containing 2                                     | protein_co | 9606   | 22:264292  | 34              |
| ENST000001 | ATAD2B-001   | ATPase family, AAA domain containing 2B                                            | protein_co | 9606   | 2:2374866  | 40              |
| ENST000001 | ATG14-001    | autophagy related 14                                                               | protein_co | 9606   | 14:553663  | 39              |
| ENST000001 | ATIC-001     | 5-aminoimidazole-4-carboxamide ribonucleotide formyltransferase/IMP cyclohydrolase | protein_co | 9606   | 2:2153118  | 37              |
| ENST000001 | ATP5SL-007   | ATP5S-like                                                                         | protein_co | 9606   | 19:414313  | 37              |
| ENST000001 | ATP6V0B-004  | ATPase, H+ transporting, lysosomal 21kDa, V0 subunit b                             | protein_co | 9606   | 1:4397494  | 30              |
| ENST000001 | ATP6V1B1-001 | ATPase, H+ transporting, lysosomal 56/58kDa, V1 subunit B1                         | protein_co | 9606   | 2:7093588  | 12              |
| ENST000001 | ATP6V1D-001  | ATPase, H+ transporting, lysosomal 34kDa, V1 subunit D                             | protein_co | 9606   | 14:673380  | 14              |
| ENST000001 | ATXN1-001    | ataxin 1                                                                           | protein_co | 9606   | 6:1629911  | 3               |
| ENST000001 | B4GALT6-003  | UDP-Gal:betaGlcNAc beta 1,4- galactosyltransferase, polypeptide 6                  | protein_co | 9606   | 18:316246  | 12              |
| ENST000001 | BAG6-001     | BCL2-associated athanogene 6                                                       | protein_co | 9606   | 6:3163902  | 4               |
| ENST000001 | BATF3-001    | basic leucine zipper transcription factor, ATF-like 3                              | protein_co | 9606   | 1:2126864  | 32              |
| ENST000001 | BBS2-001     | Bardet-Biedl syndrome 2                                                            | protein_co | 9606   | 16:564843  | 24              |
| ENST000001 | BBS9-004     | Bardet-Biedl syndrome 9                                                            | protein_co | 9606   | 7:3312953  | 33              |
| ENST000001 | BCAR1-002    | breast cancer anti-estrogen resistance 1                                           | protein_co | 9606   | 16:752290  | 35              |
| ENST000001 | BCKDK-001    | branched chain ketoacid dehydrogenase kinase                                       | protein_co | 9606   | 16:311082  | 36              |
| ENST000001 | BCL2L12-009  | BCL2-like 12 (proline rich)                                                        | protein_co | 9606   | 19:496660  | 33              |
| ENST000001 | BCL6-004     | B-cell CLL/lymphoma 6                                                              | protein_co | 9606   | 3:1877223  | 8               |
| ENST000001 | BCL7B-001    | B-cell CLL/lymphoma 7B                                                             | protein_co | 9606   | 7:7353635  | 19              |
| ENST000001 | BCL9-001     | B-cell CLL/lymphoma 9                                                              | protein_co | 9606   | 1:1475414  | 16              |
| ENST000001 | BCORL1-001   | BCL6 corepressor-like 1                                                            | protein_co | 9606   | X:1299826  | 27              |
| ENST000001 | BEST2-201    | bestrophin 2                                                                       | protein_co | 9606   | 19:127255  | 11              |
| ENST000001 | BET1-001     | Bet1 golgi vesicular membrane trafficking protein                                  | protein_co | 9606   | 7:9399324  | 41              |
| ENST000001 | BIRC2-001    | baculoviral IAP repeat containing 2                                                | protein_co | 9606   | 11:102347  | 38              |



|                         |                                                                                                   |             |      |           |    |
|-------------------------|---------------------------------------------------------------------------------------------------|-------------|------|-----------|----|
| ENST000001BLOC156-001   | biogenesis of lysosomal organelles complex-1, subunit 6, pallidin                                 | protein_co  | 9606 | 15:455871 | 30 |
| ENST000001BMP4-001      | bone morphogenetic protein 4                                                                      | protein_co  | 9606 | 14:539497 | 40 |
| ENST000001BNIP1-002     | BCL2/adenovirus E1B 19kDa interacting protein 1                                                   | protein_co  | 9606 | 5:1731444 | 5  |
| ENST000001BOD1L1-001    | biorientation of chromosomes in cell division 1-like 1                                            | protein_co  | 9606 | 4:1356873 | 39 |
| ENST000001BRD1-002      | bromodomain containing 1                                                                          | protein_co  | 9606 | 22:497732 | 4  |
| ENST000001BTN3A1-003    | butyrophilin, subfamily 3, member A1                                                              | retained_li | 9606 | 6:2640230 | 7  |
| ENST000001BTN3A3-001    | butyrophilin, subfamily 3, member A3                                                              | protein_co  | 9606 | 6:2644047 | 32 |
| ENST000001BYSL-001      | bystin-like                                                                                       | protein_co  | 9606 | 6:4192118 | 26 |
| ENST000001C10orf95-201  | chromosome 10 open reading frame 95                                                               | protein_co  | 9606 | 10:102449 | 15 |
| ENST000001C11orf63-201  | chromosome 11 open reading frame 63                                                               | protein_co  | 9606 | 11:122882 | 19 |
| ENST000001C12orf5-001   | chromosome 12 open reading frame 5                                                                | protein_co  | 9606 | 12:432120 | 43 |
| ENST000001C14orf105-001 | chromosome 14 open reading frame 105                                                              | protein_co  | 9606 | 14:574693 | 17 |
| ENST000001C16orf70-001  | chromosome 16 open reading frame 70                                                               | protein_co  | 9606 | 16:671099 | 11 |
| ENST000001C17orf53-003  | chromosome 17 open reading frame 53                                                               | protein_co  | 9606 | 17:441420 | 17 |
| ENST000001C19orf43-001  | chromosome 19 open reading frame 43                                                               | protein_co  | 9606 | 19:127306 | 43 |
| ENST000001C1QB-001      | complement component 1, q subcomponent binding protein                                            | protein_co  | 9606 | 17:543277 | 39 |
| ENST000001C20orf27-002  | chromosome 20 open reading frame 27                                                               | protein_co  | 9606 | 20:375350 | 37 |
| ENST000001C2orf43-002   | chromosome 2 open reading frame 43                                                                | protein_co  | 9606 | 2:2068505 | 41 |
| ENST000001C3orf14-006   | chromosome 3 open reading frame 14                                                                | protein_co  | 9606 | 3:6231902 | 30 |
| ENST000001C4orf6-201    | chromosome 4 open reading frame 6                                                                 | protein_co  | 9606 | 4:5525156 | 4  |
| ENST000001C5orf15-001   | chromosome 5 open reading frame 15                                                                | protein_co  | 9606 | 5:1339555 | 42 |
| ENST000001CACNG1-001    | calcium channel, voltage-dependent, gamma subunit 1                                               | protein_co  | 9606 | 17:670445 | 6  |
| ENST000001CACTIN-202    | cactin, spliceosome C complex subunit                                                             | protein_co  | 9606 | 19:361065 | 29 |
| ENST000001CAMKK1-002    | calcium/calmodulin-dependent protein kinase kinase 1, alpha                                       | protein_co  | 9606 | 17:386515 | 4  |
| ENST000001CAMSAP2-001   | calmodulin regulated spectrin-associated protein family, member 2                                 | protein_co  | 9606 | 1:2007397 | 19 |
| ENST000001CANX-001      | calnexin                                                                                          | protein_co  | 9606 | 5:1796989 | 39 |
| ENST000001CAP2-001      | CAP, adenylate cyclase-associated protein, 2 (yeast)                                              | protein_co  | 9606 | 6:1739321 | 22 |
| ENST000001CAPN15-001    | calpain 15                                                                                        | protein_co  | 9606 | 16:527856 | 34 |
| ENST000001CAT-001       | catalase                                                                                          | protein_co  | 9606 | 11:344389 | 43 |
| ENST000001CAV2-001      | caveolin 2                                                                                        | protein_co  | 9606 | 7:1164993 | 38 |
| ENST000001CBL1-014      | Cbl proto-oncogene-like 1, E3 ubiquitin protein ligase                                            | protein_co  | 9606 | 7:1077441 | 37 |
| ENST000001CBX1-001      | chromobox homolog 1                                                                               | protein_co  | 9606 | 17:480700 | 43 |
| ENST000001CBX5-002      | chromobox homolog 5                                                                               | protein_co  | 9606 | 12:542309 | 44 |
| ENST000001CBX6-003      | chromobox homolog 6                                                                               | protein_co  | 9606 | 22:388642 | 11 |
| ENST000001CBX7-001      | chromobox homolog 7                                                                               | protein_co  | 9606 | 22:391307 | 9  |
| ENST000001CCDC130-004   | coiled-coil domain containing 130                                                                 | protein_co  | 9606 | 19:137477 | 37 |
| ENST000001CCDC169-013   | coiled-coil domain containing 169                                                                 | protein_co  | 9606 | 13:362271 | 4  |
| ENST000001CCDC47-001    | coiled-coil domain containing 47                                                                  | protein_co  | 9606 | 17:637452 | 35 |
| ENST000001CCDC53-001    | coiled-coil domain containing 53                                                                  | protein_co  | 9606 | 12:102012 | 34 |
| ENST000001CCDC70-001    | coiled-coil domain containing 70                                                                  | protein_co  | 9606 | 13:518619 | 14 |
| ENST000001CCDC86-001    | coiled-coil domain containing 86                                                                  | protein_co  | 9606 | 11:608420 | 44 |
| ENST000001CCDC92-001    | coiled-coil domain containing 92                                                                  | protein_co  | 9606 | 12:123935 | 9  |
| ENST000001CCL24-001     | chemokine (C-C motif) ligand 24                                                                   | protein_co  | 9606 | 7:7581166 | 14 |
| ENST000001CCL26-001     | chemokine (C-C motif) ligand 26                                                                   | protein_co  | 9606 | 7:7576953 | 13 |
| ENST000001CCND1-001     | cyclin D1                                                                                         | protein_co  | 9606 | 11:696410 | 44 |
| ENST000001CCNI-001      | cyclin I                                                                                          | protein_co  | 9606 | 4:7704715 | 41 |
| ENST000001CCSER2-002    | coiled-coil serine-rich protein 2                                                                 | protein_co  | 9606 | 10:843286 | 36 |
| ENST000001CD4-001       | CD4 molecule                                                                                      | protein_co  | 9606 | 12:678947 | 18 |
| ENST000001CD79B-001     | CD79b molecule, immunoglobulin-associated beta                                                    | protein_co  | 9606 | 17:639287 | 9  |
| ENST000001CD93-002      | CD93 molecule                                                                                     | protein_co  | 9606 | 20:230793 | 43 |
| ENST000001CDC27-001     | cell division cycle 27                                                                            | protein_co  | 9606 | 17:471177 | 31 |
| ENST000001CDC6-001      | cell division cycle 6                                                                             | protein_co  | 9606 | 17:402876 | 42 |
| ENST000001CDC7-001      | cell division cycle 7                                                                             | protein_co  | 9606 | 1:9150089 | 32 |
| ENST000001CDCA3-006     | cell division cycle associated 3                                                                  | protein_co  | 9606 | 12:684881 | 23 |
| ENST000001CDH17-001     | cadherin 17, LI cadherin (liver-intestine)                                                        | protein_co  | 9606 | 8:9412717 | 7  |
| ENST000001CDK13-001     | cyclin-dependent kinase 13                                                                        | protein_co  | 9606 | 7:3995003 | 31 |
| ENST000001CDKN1A-001    | cyclin-dependent kinase inhibitor 1A (p21, Cip1)                                                  | protein_co  | 9606 | 6:3667865 | 42 |
| ENST000001CECR5-001     | cat eye syndrome chromosome region, candidate 5                                                   | protein_co  | 9606 | 22:171735 | 17 |
| ENST000001CENPM-001     | centromere protein M                                                                              | protein_co  | 9606 | 22:419387 | 43 |
| ENST000001CEP41-001     | centrosomal protein 41kDa                                                                         | protein_co  | 9606 | 7:1303937 | 21 |
| ENST000001CERK-001      | ceramide kinase                                                                                   | protein_co  | 9606 | 22:466844 | 43 |
| ENST000001CETP-001      | cholesterol ester transfer protein, plasma                                                        | protein_co  | 9606 | 16:569618 | 33 |
| ENST000001CFTR-001      | cystic fibrosis transmembrane conductance regulator (ATP-binding cassette sub-family C, member 7) | protein_co  | 9606 | 7:1147499 | 3  |
| ENST000001CGRRF1-001    | cell growth regulator with ring finger domain 1                                                   | protein_co  | 9606 | 14:545098 | 33 |
| ENST000001CHERP-003     | calcium homeostasis endoplasmic reticulum protein                                                 | protein_co  | 9606 | 19:165178 | 5  |
| ENST000001CHN2-001      | chimerin 2                                                                                        | protein_co  | 9606 | 7:2919441 | 15 |
| ENST000001CHPF2-001     | chondroitin polymerizing factor 2                                                                 | protein_co  | 9606 | 7:1512324 | 41 |
| ENST000001CHPT1-001     | choline phosphotransferase 1                                                                      | protein_co  | 9606 | 12:101697 | 41 |
| ENST000001CHRAC1-001    | chromatin accessibility complex 1                                                                 | protein_co  | 9606 | 8:1405112 | 41 |
| ENST000001CINP-001      | cyclin-dependent kinase 2 interacting protein                                                     | protein_co  | 9606 | 14:102348 | 40 |
| ENST000001CLDN11-001    | claudin 11                                                                                        | protein_co  | 9606 | 3:1704188 | 42 |
| ENST000001CLDN18-002    | claudin 18                                                                                        | protein_co  | 9606 | 3:1380100 | 10 |
| ENST000001CLIC5-002     | chloride intracellular channel 5                                                                  | protein_co  | 9606 | 6:4589845 | 10 |
| ENST000001CLIP2-201     | CAP-GLY domain containing linker protein 2                                                        | protein_co  | 9606 | 7:7428947 | 10 |
| ENST000001CMAS-001      | cytidine monophosphate N-acetylneuraminic acid synthetase                                         | protein_co  | 9606 | 12:220461 | 38 |
| ENST000001CMTM6-001     | CKLF-like MARVEL transmembrane domain containing 6                                                | protein_co  | 9606 | 3:3248131 | 36 |
| ENST000001CNIH1-001     | cornichon family AMPA receptor auxiliary protein 1                                                | protein_co  | 9606 | 14:544235 | 40 |
| ENST000001COA1-201      | cytochrome c oxidase assembly factor 1 homolog (S. cerevisiae)                                    | protein_co  | 9606 | 7:4363924 | 35 |
| ENST000001COIL-001      | coilin                                                                                            | protein_co  | 9606 | 17:569381 | 42 |
| ENST000001COL21A1-001   | collagen, type XXI, alpha 1                                                                       | protein_co  | 9606 | 6:5605659 | 17 |
| ENST000001COPA-002      | coatamer protein complex, subunit alpha                                                           | protein_co  | 9606 | 1:1602892 | 41 |
| ENST000001COP57A-006    | COP9 signalosome subunit 7A                                                                       | protein_co  | 9606 | 12:672407 | 22 |
| ENST000001COX15-001     | cytochrome c oxidase assembly homolog 15 (yeast)                                                  | protein_co  | 9606 | 10:997135 | 32 |
| ENST000001COX6A1-001    | cytochrome c oxidase subunit VIa polypeptide 1                                                    | protein_co  | 9606 | 12:120438 | 43 |

|                        |                                                                                        |            |                 |    |
|------------------------|----------------------------------------------------------------------------------------|------------|-----------------|----|
| ENST000001COX7A2L-201  | cytochrome c oxidase subunit VIIa polypeptide 2 like                                   | protein_co | 9606 2:4235050  | 43 |
| ENST000001CPD-001      | carboxypeptidase D                                                                     | protein_co | 9606 17:303789  | 40 |
| ENST000001CPNE5-001    | copine V                                                                               | protein_co | 9606 6:3674077  | 35 |
| ENST000001CPSF3-001    | cleavage and polyadenylation specific factor 3, 73kDa                                  | protein_co | 9606 2:9423568  | 36 |
| ENST000001CPXM2-002    | carboxypeptidase X (M14 family), member 2                                              | protein_co | 9606 10:123745  | 29 |
| ENST000001CSK-001      | c-src tyrosine kinase                                                                  | protein_co | 9606 15:747820  | 36 |
| ENST000001CSNK2A1-002  | casein kinase 2, alpha 1 polypeptide                                                   | protein_co | 9606 20:481097  | 31 |
| ENST000001CSRNP2-001   | cysteine-serine-rich nuclear protein 2                                                 | protein_co | 9606 12:510612  | 36 |
| ENST000001CST4-001     | cystatin S                                                                             | protein_co | 9606 20:236856  | 24 |
| ENST000001CSTF1-001    | cleavage stimulation factor, 3' pre-RNA, subunit 1, 50kDa                              | protein_co | 9606 20:563923  | 41 |
| ENST000001CTDP1-002    | CTD (carboxy-terminal domain, RNA polymerase II, polypeptide A) phosphatase, subunit 1 | protein_co | 9606 18:796798  | 33 |
| ENST000001CTSA-004     | cathepsin A                                                                            | protein_co | 9606 20:458913  | 40 |
| ENST000001CTSC-001     | cathepsin C                                                                            | protein_co | 9606 11:882935  | 41 |
| ENST000001CTSZ-001     | cathepsin Z                                                                            | protein_co | 9606 20:589951  | 44 |
| ENST000001CXCR4-001    | chemokine (C-X-C motif) receptor 4                                                     | protein_co | 9606 2:1361143  | 44 |
| ENST000001CYB561D2-001 | cytochrome b561 family, member D2                                                      | protein_co | 9606 3:5035084  | 4  |
| ENST000001CYP26B1-001  | cytochrome P450, family 26, subfamily B, polypeptide 1                                 | protein_co | 9606 2:7212923  | 23 |
| ENST000001CYP4F2-201   | cytochrome P450, family 4, subfamily F, polypeptide 2                                  | protein_co | 9606 19:158783  | 2  |
| ENST000001CYP4F3-001   | cytochrome P450, family 4, subfamily F, polypeptide 3                                  | protein_co | 9606 19:156409  | 22 |
| ENST000001CYP51A1-001  | cytochrome P450, family 51, subfamily A, polypeptide 1                                 | protein_co | 9606 7:9211215  | 41 |
| ENST000001DAP-001      | death-associated protein                                                               | protein_co | 9606 5:1067923  | 42 |
| ENST000001DAZAP1-001   | DAZ associated protein 1                                                               | protein_co | 9606 19:140761  | 36 |
| ENST000001DBNDD1-001   | dysbindin (dystrobrevin binding protein 1) domain containing 1                         | protein_co | 9606 16:900048  | 41 |
| ENST000001DCAF10-201   | DDB1 and CUL4 associated factor 10                                                     | protein_co | 9606 9:3780055  | 22 |
| ENST000001DDX1-201     | DEAD (Asp-Glu-Ala-Asp) box helicase 1                                                  | protein_co | 9606 2:1559162  | 41 |
| ENST000001DDX17-003    | DEAD (Asp-Glu-Ala-Asp) box helicase 17                                                 | retained_i | 9606 22:384856  | 17 |
| ENST000001DDX49-001    | DEAD (Asp-Glu-Ala-Asp) box polypeptide 49                                              | protein_co | 9606 19:189196  | 43 |
| ENST000001DECR1-001    | 2,4-dienoyl CoA reductase 1, mitochondrial                                             | protein_co | 9606 8:9000140  | 42 |
| ENST000001DENND1B-004  | DENN/MADD domain containing 1B                                                         | protein_co | 9606 1:1975522  | 9  |
| ENST000001DHDDS-011    | dehydrodolichyl diphosphate synthase                                                   | protein_co | 9606 1:2643233  | 8  |
| ENST000001DHPS-001     | deoxyhypusine synthase                                                                 | protein_co | 9606 19:126757  | 10 |
| ENST000001DHR512-001   | dehydrogenase/reductase (SDR family) member 12                                         | protein_co | 9606 13:517679  | 8  |
| ENST000001DLGAP5-001   | discs, large (Drosophila) homolog-associated protein 5                                 | protein_co | 9606 14:551481  | 43 |
| ENST000001DLL3-002     | delta-like 3 (Drosophila)                                                              | protein_co | 9606 19:394989  | 17 |
| ENST000001DMC1-001     | DNA meiotic recombinase 1                                                              | protein_co | 9606 22:385189  | 11 |
| ENST000001DNAJC12-001  | DnaJ (Hsp40) homolog, subfamily C, member 12                                           | protein_co | 9606 10:677966  | 39 |
| ENST000001DNASE2-001   | deoxyribonuclease II, lysosomal                                                        | protein_co | 9606 19:128752  | 43 |
| ENST000001DNPH1-001    | 2'-deoxynucleoside 5'-phosphate N-hydrolase 1                                          | protein_co | 9606 6:4322562  | 43 |
| ENST000001DRG2-001     | developmentally regulated GTP binding protein 2                                        | protein_co | 9606 17:180878  | 38 |
| ENST000001DUSP3-001    | dual specificity phosphatase 3                                                         | protein_co | 9606 17:437661  | 44 |
| ENST000001DUSP4-001    | dual specificity phosphatase 4                                                         | protein_co | 9606 8:2933306  | 43 |
| ENST000001DYNLL1-001   | dynein, light chain, LC8-type 1                                                        | protein_co | 9606 12:120496  | 43 |
| ENST000001EBNA1BP2-001 | EBNA1 binding protein 2                                                                | protein_co | 9606 1:4316418  | 42 |
| ENST000001EBPL-002     | emopamil binding protein-like                                                          | protein_co | 9606 13:496607  | 41 |
| ENST000001ECT2-001     | epithelial cell transforming 2                                                         | protein_co | 9606 3:1727506  | 32 |
| ENST000001EFNB2-001    | ephrin-B2                                                                              | protein_co | 9606 13:106489  | 42 |
| ENST000001EHHADH-001   | enoyl-CoA, hydratase/3-hydroxyacyl CoA dehydrogenase                                   | protein_co | 9606 3:1851906  | 42 |
| ENST000001EIF1B-001    | eukaryotic translation initiation factor 1B                                            | protein_co | 9606 3:4030968  | 41 |
| ENST000001EIF2AK1-001  | eukaryotic translation initiation factor 2-alpha kinase 1                              | protein_co | 9606 7:6022244  | 43 |
| ENST000001EIF2AK2-001  | eukaryotic translation initiation factor 2-alpha kinase 2                              | protein_co | 9606 2:3709921  | 27 |
| ENST000001EIF3D-001    | eukaryotic translation initiation factor 3, subunit D                                  | protein_co | 9606 22:365108  | 33 |
| ENST000001EIF3E-001    | eukaryotic translation initiation factor 3, subunit E                                  | protein_co | 9606 8:1082017  | 40 |
| ENST000001EIF3K-001    | eukaryotic translation initiation factor 3, subunit K                                  | protein_co | 9606 19:386190  | 41 |
| ENST000001EIF5-001     | eukaryotic translation initiation factor 5                                             | protein_co | 9606 14:103334  | 9  |
| ENST000001ELAVL2-002   | ELAV like neuron-specific RNA binding protein 2                                        | protein_co | 9606 9:2369010  | 3  |
| ENST000001ELF1-003     | E74-like factor 1 (ets domain transcription factor)                                    | protein_co | 9606 13:409320  | 40 |
| ENST000001ELK3-001     | ELK3, ETS-domain protein (SRF accessory protein 2)                                     | protein_co | 9606 12:961943  | 44 |
| ENST000001ELL2-001     | elongation factor, RNA polymerase II, 2                                                | protein_co | 9606 5:9588509  | 39 |
| ENST000001EMC3-001     | ER membrane protein complex subunit 3                                                  | protein_co | 9606 3:9962537  | 25 |
| ENST000001EML2-007     | echinoderm microtubule associated protein like 2                                       | protein_co | 9606 19:456094  | 33 |
| ENST000001ENO1-001     | enolase 1, (alpha)                                                                     | protein_co | 9606 1:8861002  | 43 |
| ENST000001EPB41L1-013  | erythrocyte membrane protein band 4.1-like 1                                           | protein_co | 9606 20:360915  | 37 |
| ENST000001EPDR1-001    | ependymin related 1                                                                    | protein_co | 9606 7:3792056  | 30 |
| ENST000001EPOR-001     | erythropoietin receptor                                                                | protein_co | 9606 19:113772  | 42 |
| ENST000001EPS8L1-006   | EPS8-like 1                                                                            | protein_co | 9606 19:550803  | 21 |
| ENST000001EPX-001      | eosinophil peroxidase                                                                  | protein_co | 9606 17:581927  | 19 |
| ENST000001ERCC1-003    | excision repair cross-complementation group 1                                          | protein_co | 9606 19:454134  | 20 |
| ENST000001ERLEC1-001   | endoplasmic reticulum lectin 1                                                         | protein_co | 9606 2:5378708  | 44 |
| ENST000001ESF1-001     | ESF1, nucleolar pre-rRNA processing protein, homolog (S. cerevisiae)                   | protein_co | 9606 20:137143  | 39 |
| ENST000001ESRRA-002    | estrogen-related receptor alpha                                                        | protein_co | 9606 11:643055  | 25 |
| ENST000001EXOC2-002    | exocyst complex component 2                                                            | protein_co | 9606 6:485133-6 | 43 |
| ENST000001EXTL3-001    | exostosin-like glycosyltransferase 3                                                   | protein_co | 9606 8:2870132  | 43 |
| ENST000001FAAH-001     | fatty acid amide hydrolase                                                             | protein_co | 9606 1:4639426  | 39 |
| ENST000001FAM117A-001  | family with sequence similarity 117, member A                                          | protein_co | 9606 17:497103  | 24 |
| ENST000001FAM118A-001  | family with sequence similarity 118, member A                                          | protein_co | 9606 22:453089  | 6  |
| ENST000001FAM124B-001  | family with sequence similarity 124B                                                   | protein_co | 9606 2:2243995  | 22 |
| ENST000001FAM136A-001  | family with sequence similarity 136, member A                                          | protein_co | 9606 2:7029597  | 42 |
| ENST000001FAM149B1-001 | family with sequence similarity 149, member B1                                         | protein_co | 9606 10:731681  | 17 |
| ENST000001FAM168A-003  | family with sequence similarity 168, member A                                          | protein_co | 9606 11:734004  | 26 |
| ENST000001FAM178A-001  | family with sequence similarity 178, member A                                          | protein_co | 9606 10:100912  | 42 |
| ENST000001FAM20A-003   | family with sequence similarity 20, member A                                           | processed_ | 9606 17:685351  | 5  |
| ENST000001FAM53C-001   | family with sequence similarity 53, member C                                           | protein_co | 9606 5:1383380  | 40 |
| ENST000001FAM65C-201   | family with sequence similarity 65, member C                                           | protein_co | 9606 20:505861  | 15 |
| ENST000001FAM76A-003   | family with sequence similarity 76, member A                                           | protein_co | 9606 1:2772605  | 8  |

|                            |                                                                           |            |      |           |    |
|----------------------------|---------------------------------------------------------------------------|------------|------|-----------|----|
| ENST000001FAM83D-201       | family with sequence similarity 83, member D                              | protein_co | 9606 | 20:389263 | 32 |
| ENST000001FAM98A-001       | family with sequence similarity 98, member A                              | protein_co | 9606 | 2:3358365 | 41 |
| ENST000001FANCE-001        | Fanconi anemia, complementation group E                                   | protein_co | 9606 | 6:3545236 | 39 |
| ENST000001FANCL-001        | Fanconi anemia, complementation group L                                   | protein_co | 9606 | 2:5815924 | 26 |
| ENST000001FAP-001          | fibroblast activation protein, alpha                                      | protein_co | 9606 | 2:1621706 | 15 |
| ENST000001FBL-001          | fibrillarin                                                               | protein_co | 9606 | 19:398344 | 37 |
| ENST000001FBXL12-001       | F-box and leucine-rich repeat protein 12                                  | protein_co | 9606 | 19:981026 | 36 |
| ENST000001FBXL4-201        | F-box and leucine-rich repeat protein 4                                   | protein_co | 9606 | 6:9887372 | 36 |
| ENST000001FBXO24-001       | F-box protein 24                                                          | protein_co | 9606 | 7:1005863 | 5  |
| ENST000001FBXO30-001       | F-box protein 30                                                          | protein_co | 9606 | 6:1457935 | 41 |
| ENST000001FERMT1-001       | fermitin family member 1                                                  | protein_co | 9606 | 20:607484 | 22 |
| ENST000001FGFR1OP2-001     | FGFR1 oncogene partner 2                                                  | protein_co | 9606 | 12:269383 | 41 |
| ENST000001FIG4-001         | FIG4 phosphoinositide 5-phosphatase                                       | protein_co | 9606 | 6:1096913 | 40 |
| ENST000001FIS1-001         | fission 1 (mitochondrial outer membrane) homolog ( <i>S. cerevisiae</i> ) | protein_co | 9606 | 7:1012396 | 43 |
| ENST000001FKBP14-001       | FK506 binding protein 14, 22 kDa                                          | protein_co | 9606 | 7:3001058 | 42 |
| ENST000001FKBP4-001        | FK506 binding protein 4, 59kDa                                            | protein_co | 9606 | 12:279495 | 43 |
| ENST000001FKBP9-001        | FK506 binding protein 9, 63 kDa                                           | protein_co | 9606 | 7:3295740 | 42 |
| ENST000001FKTN-001         | fukutin                                                                   | protein_co | 9606 | 9:1055581 | 37 |
| ENST000001FLRT1-001        | fibronectin leucine rich transmembrane protein 1                          | protein_co | 9606 | 11:641031 | 31 |
| ENST000001FNTB-001         | farnesyltransferase, CAAX box, beta                                       | protein_co | 9606 | 14:649867 | 39 |
| ENST000001FOXJ2-001        | forkhead box J2                                                           | protein_co | 9606 | 12:803270 | 42 |
| ENST000001FSD1-001         | fibronectin type III and SPRY domain containing 1                         | protein_co | 9606 | 19:430460 | 40 |
| ENST000001FSTL3-001        | folliculin-like 3 (secreted glycoprotein)                                 | protein_co | 9606 | 19:676365 | 40 |
| ENST000001FTSJ2-001        | FtsJ RNA methyltransferase homolog 2 ( <i>E. coli</i> )                   | protein_co | 9606 | 7:2234291 | 39 |
| ENST000001FYTTD1-001       | forty-two-three domain containing 1                                       | protein_co | 9606 | 3:1977497 | 38 |
| ENST000001G2E3-001         | G2/M-phase specific E3 ubiquitin protein ligase                           | protein_co | 9606 | 14:305591 | 38 |
| ENST000001GABARAPL2-001    | GABA(A) receptor-associated protein-like 2                                | protein_co | 9606 | 16:755663 | 42 |
| ENST000001GALK1-002        | galactokinase 1                                                           | protein_co | 9606 | 17:757515 | 44 |
| ENST000001GAPDH-001        | glyceraldehyde-3-phosphate dehydrogenase                                  | protein_co | 9606 | 12:653392 | 19 |
| ENST000001GAR1-003         | GAR1 ribonucleoprotein                                                    | protein_co | 9606 | 4:1098155 | 40 |
| ENST000001GCDH-001         | glutaryl-CoA dehydrogenase                                                | protein_co | 9606 | 19:128910 | 34 |
| ENST000001GCLC-001         | glutamate-cysteine ligase, catalytic subunit                              | protein_co | 9606 | 6:5349734 | 31 |
| ENST000001GDAP1-001        | ganglioside induced differentiation associated protein 1                  | protein_co | 9606 | 8:7435038 | 34 |
| ENST000001GHR-001          | growth hormone receptor                                                   | protein_co | 9606 | 5:4242377 | 13 |
| ENST000001GIT1-001         | G protein-coupled receptor kinase interacting ArfGAP 1                    | protein_co | 9606 | 17:295734 | 32 |
| ENST000001GJB6-001         | gap junction protein, beta 6, 30kDa                                       | protein_co | 9606 | 13:202219 | 3  |
| ENST000001GLA-001          | galactosidase, alpha                                                      | protein_co | 9606 | X:1013978 | 41 |
| ENST000001GLCC11-001       | glucocorticoid induced transcript 1                                       | protein_co | 9606 | 7:7968794 | 18 |
| ENST000001GLG1-001         | golgi glycoprotein 1                                                      | protein_co | 9606 | 16:744519 | 21 |
| ENST000001GLRA2-001        | glycine receptor, alpha 2                                                 | protein_co | 9606 | X:1452952 | 6  |
| ENST000001GMIP-001         | GEM interacting protein                                                   | protein_co | 9606 | 19:196294 | 33 |
| ENST000001GMNN-001         | geminin, DNA replication inhibitor                                        | protein_co | 9606 | 6:2477493 | 40 |
| ENST000001GNA11-001        | guanine nucleotide binding protein (G protein), alpha 11 (Gq class)       | protein_co | 9606 | 19:309441 | 41 |
| ENST000001GNB4-001         | guanine nucleotide binding protein (G protein), beta polypeptide 4        | protein_co | 9606 | 3:1793992 | 39 |
| ENST000001GNPNAT1-001      | glucosamine-phosphate N-acetyltransferase 1                               | protein_co | 9606 | 14:527751 | 42 |
| ENST000001GNPTG-001        | N-acetylglucosamine-1-phosphate transferase, gamma subunit                | protein_co | 9606 | 16:135192 | 17 |
| ENST000001GOLGA5-001       | golgin A5                                                                 | protein_co | 9606 | 14:927942 | 43 |
| ENST000001GOLT1B-001       | golgi transport 1B                                                        | protein_co | 9606 | 12:215018 | 37 |
| ENST000001GOPC-001         | golgi-associated PDZ and coiled-coil motif containing                     | protein_co | 9606 | 6:1175602 | 37 |
| ENST000001GORASP2-001      | golgi reassembly stacking protein 2, 55kDa                                | protein_co | 9606 | 2:1709285 | 17 |
| ENST000001GOT2-001         | glutamic-oxaloacetic transaminase 2, mitochondrial                        | protein_co | 9606 | 16:587071 | 43 |
| ENST000001GPN3-001         | GPN-loop GTPase 3                                                         | protein_co | 9606 | 12:110452 | 42 |
| ENST000001GPR63-001        | G protein-coupled receptor 63                                             | protein_co | 9606 | 6:9679412 | 36 |
| ENST000001GPCR5A-001       | G protein-coupled receptor, class C, group 5, member A                    | protein_co | 9606 | 12:128907 | 40 |
| ENST000001GRM6-201         | glutamate receptor, metabotropic 6                                        | protein_co | 9606 | 5:1789783 | 32 |
| ENST000001GRN-001          | granulin                                                                  | protein_co | 9606 | 17:443452 | 42 |
| ENST000001GS1-115G20.2-001 |                                                                           | processed  | 9606 | 1:1845665 | 11 |
| ENST000001GSK3A-001        | glycogen synthase kinase 3 alpha                                          | protein_co | 9606 | 19:422301 | 29 |
| ENST000001GSR-001          | glutathione reductase                                                     | protein_co | 9606 | 8:3067806 | 29 |
| ENST000001GSS-001          | glutathione synthetase                                                    | protein_co | 9606 | 20:349284 | 44 |
| ENST000001GSTM2-002        | glutathione S-transferase mu 2 (muscle)                                   | protein_co | 9606 | 1:1096680 | 20 |
| ENST000001GSTZ1-001        | glutathione S-transferase zeta 1                                          | protein_co | 9606 | 14:773208 | 19 |
| ENST000001GTF2H3-002       | general transcription factor IIH, polypeptide 3, 34kDa                    | protein_co | 9606 | 12:123633 | 5  |
| ENST000001GTPBP10-001      | GTP-binding protein 10 (putative)                                         | protein_co | 9606 | 7:9034667 | 14 |
| ENST000001GTPBP1-001       | GTP binding protein 1                                                     | protein_co | 9606 | 22:387057 | 27 |
| ENST000001GUCY2F-001       | guanylate cyclase 2F, retinal                                             | protein_co | 9606 | X:1093729 | 20 |
| ENST000001H2AFV-001        | H2A histone family, member V                                              | protein_co | 9606 | 7:4482679 | 29 |
| ENST000001H3F3AP6-001      | H3 histone, family 3A, pseudogene 6                                       | processed  | 9606 | 4:1396981 | 30 |
| ENST000001HARS2-001        | histidyl-tRNA synthetase 2, mitochondrial                                 | protein_co | 9606 | 5:1406914 | 30 |
| ENST000001HAS1-005         | hyaluronan synthase 1                                                     | protein_co | 9606 | 19:517131 | 9  |
| ENST000001HAUS4-003        | HAUS augmin-like complex, subunit 4                                       | protein_co | 9606 | 14:229462 | 8  |
| ENST000001HBP1-001         | HMG-box transcription factor 1                                            | protein_co | 9606 | 7:1071690 | 13 |
| ENST000001HCFC2-001        | host cell factor C2                                                       | protein_co | 9606 | 12:104064 | 40 |
| ENST000001HDAC10-001       | histone deacetylase 10                                                    | protein_co | 9606 | 22:502451 | 19 |
| ENST000001HDAC7-001        | histone deacetylase 7                                                     | protein_co | 9606 | 12:477827 | 37 |
| ENST000001HEATR6-001       | HEAT repeat containing 6                                                  | protein_co | 9606 | 17:600431 | 39 |
| ENST000001HELLS-201        | helicase, lymphoid-specific                                               | protein_co | 9606 | 10:945014 | 6  |
| ENST000001HGF-001          | hepatocyte growth factor (hepapoietin A; scatter factor)                  | protein_co | 9606 | 7:8169900 | 26 |
| ENST000001HIF3A-007        | hypoxia inducible factor 3, alpha subunit                                 | protein_co | 9606 | 19:462983 | 9  |
| ENST000001HIST1H1A-002     | histone cluster 1, H1a                                                    | protein_co | 9606 | 6:2601708 | 22 |
| ENST000001HIST1H1D-001     | histone cluster 1, H1d                                                    | protein_co | 9606 | 6:2623426 | 22 |
| ENST000001HIST1H4F-001     | histone cluster 1, H4f                                                    | protein_co | 9606 | 6:2624042 | 21 |
| ENST000001HMGXB4-002       | HMG box domain containing 4                                               | protein_co | 9606 | 22:352574 | 37 |
| ENST000001HN1L-001         | hematological and neurological expressed 1-like                           | protein_co | 9606 | 16:167825 | 40 |

|                        |                                                                                             |            |      |           |    |
|------------------------|---------------------------------------------------------------------------------------------|------------|------|-----------|----|
| ENST000001HNRNPL-001   | heterogeneous nuclear ribonucleoprotein L                                                   | protein_co | 9606 | 19:388363 | 18 |
| ENST000001HOXA2-001    | homeobox A2                                                                                 | protein_co | 9606 | 7:2710035 | 33 |
| ENST000001HP-201       | haptoglobin                                                                                 | protein_co | 9606 | 16:720546 | 4  |
| ENST000001HSCB-001     | HscB mitochondrial iron-sulfur cluster co-chaperone                                         | protein_co | 9606 | 22:287420 | 27 |
| ENST000001HSD17B10-001 | hydroxysteroid (17-beta) dehydrogenase 10                                                   | protein_co | 9606 | X:5343125 | 43 |
| ENST000001HSDL1-001    | hydroxysteroid dehydrogenase like 1                                                         | protein_co | 9606 | 16:841222 | 43 |
| ENST000001HSP90AA1-002 | heat shock protein 90kDa alpha (cytosolic), class A member 1                                | protein_co | 9606 | 14:102080 | 43 |
| ENST000001HSPA8-006    | heat shock 70kDa protein 8                                                                  | protein_co | 9606 | 11:123057 | 38 |
| ENST000001HSPB11-001   | heat shock protein family B (small), member 11                                              | protein_co | 9606 | 1:5392156 | 41 |
| ENST000001HSPE1-001    | heat shock 10kDa protein 1                                                                  | protein_co | 9606 | 2:1974999 | 21 |
| ENST000001HTATSF1-001  | HIV-1 Tat specific factor 1                                                                 | protein_co | 9606 | X:1364975 | 38 |
| ENST000001HUWE1-007    | HECT, UBA and WWE domain containing 1, E3 ubiquitin protein ligase                          | processed  | 9606 | X:5358421 | 5  |
| ENST000001HVCN1-003    | hydrogen voltage-gated channel 1                                                            | protein_co | 9606 | 12:110648 | 19 |
| ENST000001IDH3G-005    | isocitrate dehydrogenase 3 (NAD+) gamma                                                     | protein_co | 9606 | X:1537857 | 26 |
| ENST000001IFI35-007    | interferon-induced protein 35                                                               | retained_i | 9606 | 17:430067 | 4  |
| ENST000001IFRD1-001    | interferon-related developmental regulator 1                                                | protein_co | 9606 | 7:1124231 | 10 |
| ENST000001IFT81-003    | intraflagellar transport 81                                                                 | protein_co | 9606 | 12:110124 | 24 |
| ENST000001IL12B-001    | interleukin 12B                                                                             | protein_co | 9606 | 5:1593147 | 8  |
| ENST000001IL1RAP-001   | interleukin 1 receptor accessory protein                                                    | protein_co | 9606 | 3:1905140 | 26 |
| ENST000001IL23A-001    | interleukin 23, alpha subunit p19                                                           | protein_co | 9606 | 12:563388 | 36 |
| ENST000001IL32-010     | interleukin 32                                                                              | protein_co | 9606 | 16:306563 | 10 |
| ENST000001INHBA-001    | inhibin, beta A                                                                             | protein_co | 9606 | 7:4168511 | 33 |
| ENST000001INSIG2-001   | insulin induced gene 2                                                                      | protein_co | 9606 | 2:1180884 | 41 |
| ENST000001IRF1-001     | interferon regulatory factor 1                                                              | protein_co | 9606 | 5:1324816 | 34 |
| ENST000001ISOC1-001    | isochorismatase domain containing 1                                                         | protein_co | 9606 | 5:1290947 | 42 |
| ENST000001ITGB8-001    | integrin, beta 8                                                                            | protein_co | 9606 | 7:2033112 | 41 |
| ENST000001ITI16-001    | inter-alpha-trypsin inhibitor heavy chain family, member 6                                  | protein_co | 9606 | X:5474889 | 8  |
| ENST000001JADE1-201    | jade family PHD finger 1                                                                    | protein_co | 9606 | 4:1288096 | 16 |
| ENST000001JOSD1-001    | Josephin domain containing 1                                                                | protein_co | 9606 | 22:386855 | 41 |
| ENST000001KALRN-005    | kalirin, RhoGEF kinase                                                                      | protein_co | 9606 | 3:1240946 | 11 |
| ENST000001KCNIP2-002   | Kv channel interacting protein 2                                                            | protein_co | 9606 | 10:101827 | 4  |
| ENST000001KCNJ2-002    | potassium inwardly-rectifying channel, subfamily J, member 2                                | protein_co | 9606 | 17:701695 | 40 |
| ENST000001KCTD10-001   | potassium channel tetramerization domain containing 10                                      | protein_co | 9606 | 12:109448 | 21 |
| ENST000001KCTD9-001    | potassium channel tetramerization domain containing 9                                       | protein_co | 9606 | 8:2542784 | 38 |
| ENST000001KDM5B-002    | lysine (K)-specific demethylase 5B                                                          | protein_co | 9606 | 1:2027299 | 14 |
| ENST000001KEAP1-001    | kelch-like ECH-associated protein 1                                                         | protein_co | 9606 | 19:104861 | 16 |
| ENST000001KIAA0141-003 | KIAA0141                                                                                    | protein_co | 9606 | 5:1419238 | 37 |
| ENST000001KIAA0922-008 | KIAA0922                                                                                    | protein_co | 9606 | 4:1535558 | 19 |
| ENST000001KIAA1467-001 | KIAA1467                                                                                    | protein_co | 9606 | 12:130442 | 40 |
| ENST000001KIF22-001    | kinesin family member 22                                                                    | protein_co | 9606 | 16:297907 | 44 |
| ENST000001KIF6-007     | kinesin family member 6                                                                     | protein_co | 9606 | 6:3933615 | 6  |
| ENST000001KLC1-011     | kinesin light chain 1                                                                       | protein_co | 9606 | 14:103629 | 6  |
| ENST000001KLHL18-001   | kelch-like family member 18                                                                 | protein_co | 9606 | 3:4728294 | 42 |
| ENST000001KLHL20-001   | kelch-like family member 20                                                                 | protein_co | 9606 | 1:1737149 | 41 |
| ENST000001KLHL2-001    | kelch-like family member 2                                                                  | protein_co | 9606 | 4:1652076 | 35 |
| ENST000001KNOP1-001    | lysine-rich nucleolar protein 1                                                             | protein_co | 9606 | 16:197019 | 26 |
| ENST000001KRR1-001     | KRR1, small subunit (SSU) processome component, homolog (yeast)                             | protein_co | 9606 | 12:754908 | 37 |
| ENST000001KRT14-001    | keratin 14                                                                                  | protein_co | 9606 | 17:415822 | 16 |
| ENST000001KRT20-001    | keratin 20                                                                                  | protein_co | 9606 | 17:408759 | 2  |
| ENST000001KXD1-001     | KxDL motif containing 1                                                                     | protein_co | 9606 | 19:185577 | 43 |
| ENST000001L3HYPDH-003  | L-3-hydroxyproline dehydratase (trans-)                                                     | protein_co | 9606 | 14:594726 | 38 |
| ENST000001L3MBTL2-001  | l(3)mbt-like 2 (Drosophila)                                                                 | protein_co | 9606 | 22:412052 | 41 |
| ENST000001LAG3-001     | lymphocyte-activation gene 3                                                                | protein_co | 9606 | 12:677252 | 17 |
| ENST000001LAMA4-001    | laminin, alpha 4                                                                            | protein_co | 9606 | 6:1121087 | 22 |
| ENST000001LAMB1-001    | laminin, beta 1                                                                             | protein_co | 9606 | 7:1079238 | 37 |
| ENST000001LAMB4-001    | laminin, beta 4                                                                             | protein_co | 9606 | 7:1080235 | 8  |
| ENST000001LAMP2-001    | lysosomal-associated membrane protein 2                                                     | protein_co | 9606 | X:1204308 | 42 |
| ENST000001LGALS1-001   | lectin, galactoside-binding, soluble, 1                                                     | protein_co | 9606 | 22:376756 | 43 |
| ENST000001LGALS1-001   | lectin, galactoside-binding-like                                                            | protein_co | 9606 | 2:6445409 | 25 |
| ENST000001LIPE-001     | lipase, hormone-sensitive                                                                   | protein_co | 9606 | 19:424015 | 10 |
| ENST000001LMF2-001     | lipase maturation factor 2                                                                  | protein_co | 9606 | 22:505029 | 4  |
| ENST000001LNPEP-001    | leucyl/cystinyl aminopeptidase                                                              | protein_co | 9606 | 5:9693546 | 40 |
| ENST000001LOX-001      | lysyl oxidase                                                                               | protein_co | 9606 | 5:1220631 | 42 |
| ENST000001LRP1-001     | low density lipoprotein receptor-related protein 1                                          | protein_co | 9606 | 12:571284 | 16 |
| ENST000001LRP11-001    | low density lipoprotein receptor-related protein 11                                         | protein_co | 9606 | 6:1498187 | 41 |
| ENST000001LRRC59-001   | leucine rich repeat containing 59                                                           | protein_co | 9606 | 17:503812 | 44 |
| ENST000001LRRC7-001    | leucine rich repeat containing 7                                                            | protein_co | 9606 | 1:6976017 | 2  |
| ENST000001LRRFIP1-001  | leucine rich repeat (in FLII) interacting protein 1                                         | protein_co | 9606 | 2:2376922 | 10 |
| ENST000001LST1-003     | leukocyte specific transcript 1                                                             | protein_co | 9606 | 6:3158684 | 6  |
| ENST000001LTBP4-002    | latent transforming growth factor beta binding protein 4                                    | protein_co | 9606 | 19:405931 | 10 |
| ENST000001LZTR1-001    | leucine-zipper-like transcription regulator 1                                               | protein_co | 9606 | 22:209820 | 24 |
| ENST000001M6PR-001     | mannose-6-phosphate receptor (cation dependent)                                             | protein_co | 9606 | 12:894036 | 25 |
| ENST000001MAGED2-201   | melanoma antigen family D, 2                                                                | protein_co | 9606 | X:5480833 | 4  |
| ENST000001MANBA-001    | mannosidase, beta A, lysosomal                                                              | protein_co | 9606 | 4:1026318 | 37 |
| ENST000001MAP2-003     | microtubule-associated protein 2                                                            | protein_co | 9606 | 2:2094240 | 23 |
| ENST000001MAP2K5-001   | mitogen-activated protein kinase kinase 5                                                   | protein_co | 9606 | 15:675427 | 43 |
| ENST000001MAP4K5-001   | mitogen-activated protein kinase kinase kinase 5                                            | protein_co | 9606 | 14:504185 | 33 |
| ENST000001MAPK1-001    | mitogen-activated protein kinase 1                                                          | protein_co | 9606 | 22:217545 | 34 |
| ENST000001MAPK14-001   | mitogen-activated protein kinase 14                                                         | protein_co | 9606 | 6:3602771 | 16 |
| ENST000001MAPK14-002   | mitogen-activated protein kinase 14                                                         | protein_co | 9606 | 6:3602777 | 40 |
| ENST000001MARK3-005    | MAP/microtubule affinity-regulating kinase 3                                                | protein_co | 9606 | 14:103385 | 29 |
| ENST000001MASP1-002    | mannan-binding lectin serine peptidase 1 (C4/C2 activating component of Ra-reactive factor) | protein_co | 9606 | 3:1872463 | 8  |
| ENST000001MCM3-006     | minichromosome maintenance complex component 3                                              | protein_co | 9606 | 6:5226400 | 36 |
| ENST000001MCM5-001     | minichromosome maintenance complex component 5                                              | protein_co | 9606 | 22:354000 | 19 |

|                        |                                                                                                                                   |            |      |           |    |
|------------------------|-----------------------------------------------------------------------------------------------------------------------------------|------------|------|-----------|----|
| ENST000001MDFI-001     | MyoD family inhibitor                                                                                                             | protein_co | 9606 | 6:4163844 | 25 |
| ENST000001MDH1-001     | malate dehydrogenase 1, NAD (soluble)                                                                                             | protein_co | 9606 | 2:6358860 | 41 |
| ENST000001MED28-001    | mediator complex subunit 28                                                                                                       | protein_co | 9606 | 4:1761463 | 36 |
| ENST000001MED31-001    | mediator complex subunit 31                                                                                                       | protein_co | 9606 | 17:664331 | 14 |
| ENST000001MEST-001     | mesoderm specific transcript                                                                                                      | protein_co | 9606 | 7:1304920 | 32 |
| ENST000001METTL25-001  | methyltransferase like 25                                                                                                         | protein_co | 9606 | 12:823584 | 31 |
| ENST000001MFN2-001     | mitofusin 2                                                                                                                       | protein_co | 9606 | 1:1198031 | 44 |
| ENST000001MGA-201      | MGA, MAX dimerization protein                                                                                                     | protein_co | 9606 | 15:416604 | 31 |
| ENST000001MGP-004      | matrix Gla protein                                                                                                                | protein_co | 9606 | 12:148818 | 24 |
| ENST000001MGST1-201    | microsomal glutathione S-transferase 1                                                                                            | protein_co | 9606 | 12:163471 | 3  |
| ENST000001MICALL1-001  | MICAL-like 1                                                                                                                      | protein_co | 9606 | 22:379062 | 41 |
| ENST000001MKRN2-001    | makorin ring finger protein 2                                                                                                     | protein_co | 9606 | 3:1255701 | 38 |
| ENST000001MLEC-001     | malectin                                                                                                                          | protein_co | 9606 | 12:120686 | 34 |
| ENST000001MLH1-001     | mutL homolog 1                                                                                                                    | protein_co | 9606 | 3:3699333 | 37 |
| ENST000001MMP2-001     | matrix metalloproteinase 2 (gelatinase A, 72kDa gelatinase, 72kDa type IV collagenase)                                            | protein_co | 9606 | 16:554789 | 42 |
| ENST000001MND1-001     | meiotic nuclear divisions 1 homolog (S. cerevisiae)                                                                               | protein_co | 9606 | 4:1533446 | 33 |
| ENST000001MNT-001      | MAX network transcriptional repressor                                                                                             | protein_co | 9606 | 17:238406 | 39 |
| ENST000001MOC53-001    | molybdenum cofactor synthesis 3                                                                                                   | protein_co | 9606 | 20:509588 | 44 |
| ENST000001MOGS-001     | mannosyl-oligosaccharide glucosidase                                                                                              | protein_co | 9606 | 2:7446105 | 39 |
| ENST000001MON1B-001    | MON1 secretory trafficking family member B                                                                                        | protein_co | 9606 | 16:771909 | 40 |
| ENST000001MORC2-002    | MORC family CW-type zinc finger 2                                                                                                 | protein_co | 9606 | 22:309266 | 15 |
| ENST000001MOSPD3-001   | motile sperm domain containing 3                                                                                                  | protein_co | 9606 | 7:1006121 | 12 |
| ENST000001MPP6-001     | membrane protein, palmitoylated 6 (MAGUK p55 subfamily member 6)                                                                  | protein_co | 9606 | 7:2457334 | 33 |
| ENST000001MRI1-002     | methylthioribose-1-phosphate isomerase 1                                                                                          | protein_co | 9606 | 19:137645 | 22 |
| ENST000001MRPL27-001   | mitochondrial ribosomal protein L27                                                                                               | protein_co | 9606 | 17:503678 | 42 |
| ENST000001MRPL28-006   | mitochondrial ribosomal protein L28                                                                                               | protein_co | 9606 | 16:367384 | 44 |
| ENST000001MRPL32-001   | mitochondrial ribosomal protein L32                                                                                               | protein_co | 9606 | 7:4293220 | 36 |
| ENST000001MRPL51-001   | mitochondrial ribosomal protein L51                                                                                               | protein_co | 9606 | 12:649188 | 38 |
| ENST000001MRPS10-001   | mitochondrial ribosomal protein S10                                                                                               | protein_co | 9606 | 6:4220680 | 43 |
| ENST000001MRPS2-201    | mitochondrial ribosomal protein S2                                                                                                | protein_co | 9606 | 9:1355006 | 42 |
| ENST000001MRPS30-003   | mitochondrial ribosomal protein S30                                                                                               | processed_ | 9606 | 5:4481521 | 13 |
| ENST000001MRPS34-002   | mitochondrial ribosomal protein S34                                                                                               | protein_co | 9606 | 16:177189 | 8  |
| ENST000001MRPS35-001   | mitochondrial ribosomal protein S35                                                                                               | protein_co | 9606 | 12:277107 | 42 |
| ENST000001MRPS7-001    | mitochondrial ribosomal protein S7                                                                                                | protein_co | 9606 | 17:752616 | 39 |
| ENST000001MSANTD2-001  | Myb/SANT-like DNA-binding domain containing 2                                                                                     | protein_co | 9606 | 11:124766 | 29 |
| ENST000001MSH2-001     | mutS homolog 2                                                                                                                    | protein_co | 9606 | 2:4740296 | 32 |
| ENST000001MT2A-001     | metallothionein 2A                                                                                                                | protein_co | 9606 | 16:566081 | 42 |
| ENST000001MTFMT-001    | mitochondrial methionyl-tRNA formyltransferase                                                                                    | protein_co | 9606 | 15:650015 | 27 |
| ENST000001MTHFD1-019   | methylenetetrahydrofolate dehydrogenase (NADP+ dependent) 1, methylenetetrahydrofolate cyclohydrolase, formyltetrahydrofolate syn | protein_co | 9606 | 14:643883 | 40 |
| ENST000001MTMR9-001    | myotubularin related protein 9                                                                                                    | protein_co | 9606 | 8:1128441 | 39 |
| ENST000001MTRF1-008    | mitochondrial translational release factor 1                                                                                      | nonsense_  | 9606 | 13:412522 | 9  |
| ENST000001MVK-001      | mevalonate kinase                                                                                                                 | protein_co | 9606 | 12:109573 | 40 |
| ENST000001MYBL2-001    | v-myb avian myeloblastosis viral oncogene homolog-like 2                                                                          | protein_co | 9606 | 20:436671 | 43 |
| ENST000001MYF6-001     | myogenic factor 6 (herculin)                                                                                                      | protein_co | 9606 | 12:807074 | 3  |
| ENST000001MYH9-001     | myosin, heavy chain 9, non-muscle                                                                                                 | protein_co | 9606 | 22:362812 | 42 |
| ENST000001MYL12A-001   | myosin, light chain 12A, regulatory, non-sarcomeric                                                                               | protein_co | 9606 | 18:324753 | 22 |
| ENST000001MYL12B-001   | myosin, light chain 12B, regulatory                                                                                               | protein_co | 9606 | 18:326190 | 44 |
| ENST000001MZ1-001      | myeloid zinc finger 1                                                                                                             | protein_co | 9606 | 19:585619 | 13 |
| ENST000001NAA50-001    | N(alpha)-acetyltransferase 50, NatE catalytic subunit                                                                             | protein_co | 9606 | 3:1137164 | 24 |
| ENST000001NAGK-032     | N-acetylglucosamine kinase                                                                                                        | protein_co | 9606 | 2:7106862 | 35 |
| ENST000001NAGLU-001    | N-acetylglucosaminidase, alpha                                                                                                    | protein_co | 9606 | 17:425361 | 40 |
| ENST000001NAMPT-001    | nicotinamide phosphoribosyltransferase                                                                                            | protein_co | 9606 | 7:1062482 | 41 |
| ENST000001NANS-001     | N-acetylneuraminic acid synthase                                                                                                  | protein_co | 9606 | 9:9805673 | 41 |
| ENST000001NCAPH-001    | non-SMC condensin I complex, subunit H                                                                                            | protein_co | 9606 | 2:9633578 | 36 |
| ENST000001NCK2-001     | NCK adaptor protein 2                                                                                                             | protein_co | 9606 | 2:1057448 | 32 |
| ENST000001NCLN-001     | nicalin                                                                                                                           | protein_co | 9606 | 19:318560 | 42 |
| ENST000001NCOA7-012    | nuclear receptor coactivator 7                                                                                                    | protein_co | 9606 | 6:1257909 | 31 |
| ENST000001NDFIP2-001   | Nedd4 family interacting protein 2                                                                                                | protein_co | 9606 | 13:794811 | 38 |
| ENST000001NDUFAB1-001  | NADH dehydrogenase (ubiquinone) 1, alpha/beta subcomplex, 1, 8kDa                                                                 | protein_co | 9606 | 16:235810 | 43 |
| ENST000001NDUFB2-001   | NADH dehydrogenase (ubiquinone) 1 beta subcomplex, 2, 8kDa                                                                        | protein_co | 9606 | 7:1406966 | 34 |
| ENST000001NDUFB3-001   | NADH dehydrogenase (ubiquinone) 1 beta subcomplex, 3, 12kDa                                                                       | protein_co | 9606 | 2:2010717 | 37 |
| ENST000001NDUFB7-001   | NADH dehydrogenase (ubiquinone) 1 beta subcomplex, 7, 18kDa                                                                       | protein_co | 9606 | 19:145660 | 44 |
| ENST000001NDUFS1-001   | NADH dehydrogenase (ubiquinone) Fe-S protein 1, 75kDa (NADH-coenzyme Q reductase)                                                 | protein_co | 9606 | 2:2061148 | 19 |
| ENST000001NECAB3-010   | N-terminal EF-hand calcium binding protein 3                                                                                      | protein_co | 9606 | 20:336570 | 20 |
| ENST000001NEK9-001     | NIMA-related kinase 9                                                                                                             | protein_co | 9606 | 14:750793 | 14 |
| ENST000001NFE2L3-001   | nuclear factor, erythroid 2-like 3                                                                                                | protein_co | 9606 | 7:2615224 | 40 |
| ENST000001NFKB1-001    | nuclear factor of kappa light polypeptide gene enhancer in B-cells 1                                                              | protein_co | 9606 | 4:1025013 | 23 |
| ENST000001NFYB-001     | nuclear transcription factor Y, beta                                                                                              | protein_co | 9606 | 12:104117 | 40 |
| ENST000001NHP2L1-003   | NHP2 non-histone chromosome protein 2-like 1 (S. cerevisiae)                                                                      | protein_co | 9606 | 22:416739 | 36 |
| ENST000001NIN-201      | ninein (GSK3B interacting protein)                                                                                                | protein_co | 9606 | 14:507197 | 38 |
| ENST000001NIPAL3-001   | NIPA-like domain containing 3                                                                                                     | protein_co | 9606 | 1:2441580 | 13 |
| ENST000001NIPSNAP1-001 | nipsnap homolog 1 (C. elegans)                                                                                                    | protein_co | 9606 | 22:295548 | 42 |
| ENST000001NKTR-001     | natural killer cell triggering receptor                                                                                           | protein_co | 9606 | 3:4260061 | 31 |
| ENST000001NME3-001     | NME/NM23 nucleoside diphosphate kinase 3                                                                                          | protein_co | 9606 | 16:177028 | 16 |
| ENST000001NME4-001     | NME/NM23 nucleoside diphosphate kinase 4                                                                                          | protein_co | 9606 | 16:397209 | 44 |
| ENST000001NOD1-001     | nucleotide-binding oligomerization domain containing 1                                                                            | protein_co | 9606 | 7:3042452 | 38 |
| ENST000001NRS5A2-003   | nuclear receptor subfamily 5, group A, member 2                                                                                   | protein_co | 9606 | 1:2000276 | 18 |
| ENST000001NRBP1-001    | nuclear receptor binding protein 1                                                                                                | protein_co | 9606 | 2:2742779 | 18 |
| ENST000001NRF1-001     | nuclear respiratory factor 1                                                                                                      | protein_co | 9606 | 7:1296117 | 33 |
| ENST000001NRK-001      | Nik related kinase                                                                                                                | protein_co | 9606 | X:1058225 | 38 |
| ENST000001NSMAF-001    | neutral sphingomyelinase (N-SMase) activation associated factor                                                                   | protein_co | 9606 | 8:5858350 | 40 |
| ENST000001NSRP1-001    | nuclear speckle splicing regulatory protein 1                                                                                     | protein_co | 9606 | 17:301167 | 35 |
| ENST000001NTSC3A-001   | 5'-nucleotidase, cytosolic IIIA                                                                                                   | protein_co | 9606 | 7:3301414 | 7  |
| ENST000001NUDCD1-001   | NudC domain containing 1                                                                                                          | protein_co | 9606 | 8:1092409 | 18 |

|                        |                                                                                              |            |                |    |
|------------------------|----------------------------------------------------------------------------------------------|------------|----------------|----|
| ENST000001NUIP2-001    | nuclear fragile X mental retardation protein interacting protein 2                           | protein_co | 9606 17:292558 | 44 |
| ENST000001NUP155-001   | nucleoporin 155kDa                                                                           | protein_co | 9606 5:3728813 | 39 |
| ENST000001NUP85-001    | nucleoporin 85kDa                                                                            | protein_co | 9606 17:752056 | 34 |
| ENST000001NUTF2-001    | nuclear transport factor 2                                                                   | protein_co | 9606 16:678467 | 32 |
| ENST000001OBFC1-001    | oligonucleotide/oligosaccharide-binding fold containing 1                                    | protein_co | 9606 10:103882 | 39 |
| ENST000001OCEL1-001    | occludin/ELL domain containing 1                                                             | protein_co | 9606 19:172262 | 30 |
| ENST000001ODC1-001     | ornithine decarboxylase 1                                                                    | protein_co | 9606 2:1043996 | 35 |
| ENST000001OGDH-001     | oxoglutarate (alpha-ketoglutarate) dehydrogenase (lipoamide)                                 | protein_co | 9606 7:4460663 | 39 |
| ENST000001OIP5-001     | Opa interacting protein 5                                                                    | protein_co | 9606 15:413092 | 13 |
| ENST000001OMG-001      | oligodendrocyte myelin glycoprotein                                                          | protein_co | 9606 17:312946 | 14 |
| ENST000001OR1E2-001    | olfactory receptor, family 1, subfamily E, member 2                                          | protein_co | 9606 17:343287 | 3  |
| ENST000001ORC2-001     | origin recognition complex, subunit 2                                                        | protein_co | 9606 2:2009089 | 37 |
| ENST000001ORC6-001     | origin recognition complex, subunit 6                                                        | protein_co | 9606 16:466896 | 36 |
| ENST000001OSBPL6-001   | oxysterol binding protein-like 6                                                             | protein_co | 9606 2:1781946 | 10 |
| ENST000001OSBPL7-001   | oxysterol binding protein-like 7                                                             | protein_co | 9606 17:478073 | 37 |
| ENST000001OSCP1-002    | organic solute carrier partner 1                                                             | protein_co | 9606 1:3641790 | 40 |
| ENST000001OSGEP-001    | O-sialoglycoprotein endopeptidase                                                            | protein_co | 9606 14:204466 | 36 |
| ENST000001OSTM1-001    | osteopetrosis associated transmembrane protein 1                                             | protein_co | 9606 6:1080414 | 35 |
| ENST000001OTUD4P1-001  | OTUD4 pseudogene 1                                                                           | processed  | 9606 12:383945 | 22 |
| ENST000001OXCT1-001    | 3-oxoacid CoA transferase 1                                                                  | protein_co | 9606 5:4173006 | 40 |
| ENST000001OXT-001      | oxytocin/neurophysin I prepropeptide                                                         | protein_co | 9606 20:307162 | 17 |
| ENST000001P4HA2-003    | prolyl 4-hydroxylase, alpha polypeptide II                                                   | protein_co | 9606 5:1321926 | 25 |
| ENST000001PABPC1L-017  | poly(A) binding protein, cytoplasmic 1-like                                                  | protein_co | 9606 20:449100 | 23 |
| ENST000001PANK3-001    | pantothenate kinase 3                                                                        | protein_co | 9606 5:1685484 | 43 |
| ENST000001PANX1-001    | pannexin 1                                                                                   | protein_co | 9606 11:941289 | 42 |
| ENST000001PAPOLA-001   | poly(A) polymerase alpha                                                                     | protein_co | 9606 14:965023 | 43 |
| ENST000001PAPOLG-001   | poly(A) polymerase gamma                                                                     | protein_co | 9606 2:6075623 | 42 |
| ENST000001PASK-001     | PAS domain containing serine/threonine kinase                                                | protein_co | 9606 2:2411060 | 13 |
| ENST000001PATZ1-003    | POZ (BTB) and AT hook containing zinc finger 1                                               | protein_co | 9606 22:313406 | 42 |
| ENST000001PCDHB15-001  | protocadherin beta 15                                                                        | protein_co | 9606 5:1412453 | 32 |
| ENST000001PCDHB5-001   | protocadherin beta 5                                                                         | protein_co | 9606 5:1411352 | 32 |
| ENST000001PCDHB7-001   | protocadherin beta 7                                                                         | protein_co | 9606 5:1411726 | 27 |
| ENST000001PCDHB8-001   | protocadherin beta 8                                                                         | protein_co | 9606 5:1411777 | 11 |
| ENST000001PCK2-002     | phosphoenolpyruvate carboxykinase 2 (mitochondrial)                                          | protein_co | 9606 14:240941 | 40 |
| ENST000001PDCD2-009    | programmed cell death 2                                                                      | nonsense   | 9606 6:1705774 | 33 |
| ENST000001PDHX-001     | pyruvate dehydrogenase complex, component X                                                  | protein_co | 9606 11:349165 | 38 |
| ENST000001PDK4-001     | pyruvate dehydrogenase kinase, isozyme 4                                                     | protein_co | 9606 7:9558349 | 39 |
| ENST000001PDRG1-001    | p53 and DNA-damage regulated 1                                                               | protein_co | 9606 20:319443 | 41 |
| ENST000001PDXP-001     | pyridoxal (pyridoxine, vitamin B6) phosphatase                                               | protein_co | 9606 22:376587 | 39 |
| ENST000001PDZD11-007   | PDZ domain containing 11                                                                     | protein_co | 9606 X:7028659 | 43 |
| ENST000001PEPD-001     | peptidase D                                                                                  | protein_co | 9606 19:333869 | 42 |
| ENST000001PEX16-002    | peroxisomal biogenesis factor 16                                                             | protein_co | 9606 11:459096 | 22 |
| ENST000001PFKFB4-001   | 6-phosphofructo-2-kinase/fructose-2,6-bisphosphatase 4                                       | protein_co | 9606 3:4851768 | 35 |
| ENST000001PFN2-001     | profilin 2                                                                                   | protein_co | 9606 3:1499649 | 6  |
| ENST000001PGF-002      | placental growth factor                                                                      | protein_co | 9606 14:749418 | 29 |
| ENST000001PGRMC1-001   | progesterone receptor membrane component 1                                                   | protein_co | 9606 X:1192362 | 43 |
| ENST000001PIGH-001     | phosphatidylinositol glycan anchor biosynthesis, class H                                     | protein_co | 9606 14:675893 | 41 |
| ENST000001PIGQ-002     | phosphatidylinositol glycan anchor biosynthesis, class Q                                     | protein_co | 9606 16:570018 | 31 |
| ENST000001PIGU-001     | phosphatidylinositol glycan anchor biosynthesis, class U                                     | protein_co | 9606 20:345605 | 41 |
| ENST000001PIGV-001     | phosphatidylinositol glycan anchor biosynthesis, class V                                     | protein_co | 9606 1:2678799 | 34 |
| ENST000001PIGZ-003     | phosphatidylinositol glycan anchor biosynthesis, class Z                                     | retained_i | 9606 3:1969515 | 12 |
| ENST000001PIK3R2-001   | phosphoinositide-3-kinase, regulatory subunit 2 (beta)                                       | protein_co | 9606 19:181531 | 41 |
| ENST000001PIN4-002     | protein (peptidylprolyl cis/trans isomerase) NIMA-interacting, 4 (parvulin)                  | protein_co | 9606 X:7218167 | 7  |
| ENST000001PITH1-001    | PITH (C-terminal proteasome-interacting domain of thioredoxin-like) domain containing 1      | protein_co | 9606 1:2377840 | 43 |
| ENST000001PITRM1-007   | pitrilysin metalloproteinase 1                                                               | protein_co | 9606 10:313773 | 41 |
| ENST000001PKD2-001     | polycystic kidney disease 2 (autosomal dominant)                                             | protein_co | 9606 4:8800766 | 39 |
| ENST000001PKN1-001     | protein kinase N1                                                                            | protein_co | 9606 19:144333 | 41 |
| ENST000001PLA2G12A-001 | phospholipase A2, group XIA                                                                  | protein_co | 9606 4:1097099 | 40 |
| ENST000001PLA2G15-001  | phospholipase A2, group XV                                                                   | protein_co | 9606 16:682453 | 41 |
| ENST000001PLBD1-001    | phospholipase B domain containing 1                                                          | protein_co | 9606 12:145036 | 31 |
| ENST000001PLEK2-001    | pleckstrin 2                                                                                 | protein_co | 9606 14:673869 | 38 |
| ENST000001PLEKHA3-001  | pleckstrin homology domain containing, family A (phosphoinositide binding specific) member 3 | protein_co | 9606 2:1784804 | 43 |
| ENST000001PLEKHB2-001  | pleckstrin homology domain containing, family B (evectins) member 2                          | protein_co | 9606 2:1311049 | 41 |
| ENST000001PLGRKT-001   | plasminogen receptor, C-terminal lysine transmembrane protein                                | protein_co | 9606 9:5357973 | 40 |
| ENST000001PLIN3-001    | perilipin 3                                                                                  | protein_co | 9606 19:483834 | 44 |
| ENST000001PLOD1-001    | procollagen-lysine, 2-oxoglutarate 5-dioxygenase 1                                           | protein_co | 9606 1:1193475 | 44 |
| ENST000001PLOD3-001    | procollagen-lysine, 2-oxoglutarate 5-dioxygenase 3                                           | protein_co | 9606 7:1012059 | 39 |
| ENST000001PNPLA6-001   | patatin-like phospholipase domain containing 6                                               | protein_co | 9606 19:753400 | 9  |
| ENST000001PNPO-001     | pyridoxamine 5'-phosphate oxidase                                                            | protein_co | 9606 17:479415 | 13 |
| ENST000001POLE2-001    | polymerase (DNA directed), epsilon 2, accessory subunit                                      | protein_co | 9606 14:496435 | 24 |
| ENST000001POLE4-006    | polymerase (DNA-directed), epsilon 4, accessory subunit                                      | processed  | 9606 2:7495879 | 6  |
| ENST000001POLK-001     | polymerase (DNA directed) kappa                                                              | protein_co | 9606 5:7551175 | 13 |
| ENST000001POLR2E-012   | polymerase (RNA) II (DNA directed) polypeptide E, 25kDa                                      | nonsense   | 9606 19:108816 | 31 |
| ENST000001POLR3B-001   | polymerase (RNA) III (DNA directed) polypeptide B                                            | protein_co | 9606 12:106357 | 40 |
| ENST000001PON2-002     | paraoxonase 2                                                                                | protein_co | 9606 7:9540489 | 25 |
| ENST000001PPFBP1-001   | PTPRF interacting protein, binding protein 1 (liprin beta 1)                                 | protein_co | 9606 12:275242 | 33 |
| ENST000001PPIF-001     | peptidylprolyl isomerase F                                                                   | protein_co | 9606 10:793474 | 43 |
| ENST000001PPM1H-001    | protein phosphatase, Mg2+/Mn2+ dependent, 1H                                                 | protein_co | 9606 12:626439 | 38 |
| ENST000001PPP1R13B-001 | protein phosphatase 1, regulatory subunit 13B                                                | protein_co | 9606 14:103733 | 31 |
| ENST000001PPP2CB-001   | protein phosphatase 2, catalytic subunit, beta isozyme                                       | protein_co | 9606 8:3078561 | 38 |
| ENST000001PPP3CC-002   | protein phosphatase 3, catalytic subunit, gamma isozyme                                      | protein_co | 9606 8:2244108 | 34 |
| ENST000001PPP4R1L-005  | protein phosphatase 4, regulatory subunit 1-like (pseudogene)                                | processed  | 9606 20:582457 | 31 |
| ENST000001PPP5C-001    | protein phosphatase 5, catalytic subunit                                                     | protein_co | 9606 19:463469 | 42 |
| ENST000001PRAMEF2-001  | PRAME family member 2                                                                        | protein_co | 9606 1:1285708 | 2  |

|                        |                                                                                       |            |      |           |    |
|------------------------|---------------------------------------------------------------------------------------|------------|------|-----------|----|
| ENST000001PRDM4-001    | PR domain containing 4                                                                | protein_co | 9606 | 12:107732 | 42 |
| ENST000001PRKAB1-001   | protein kinase, AMP-activated, beta 1 non-catalytic subunit                           | protein_co | 9606 | 12:119667 | 41 |
| ENST000001PRKAG3-001   | protein kinase, AMP-activated, gamma 3 non-catalytic subunit                          | nonsense_  | 9606 | 2:2188223 | 7  |
| ENST000001PRKD3-201    | protein kinase D3                                                                     | protein_co | 9606 | 2:3725050 | 29 |
| ENST000001PRLHR-001    | prolactin releasing hormone receptor                                                  | protein_co | 9606 | 10:118589 | 27 |
| ENST000001PROCRR-001   | protein C receptor, endothelial                                                       | protein_co | 9606 | 20:351720 | 44 |
| ENST000001PRPF19-001   | pre-mRNA processing factor 19                                                         | protein_co | 9606 | 11:608907 | 42 |
| ENST000001PRRG2-001    | proline rich Gla (G-carboxylglutamic acid) 2                                          | protein_co | 9606 | 19:495813 | 24 |
| ENST000001PRRX1-002    | paired related homeobox 1                                                             | protein_co | 9606 | 1:1706639 | 22 |
| ENST000001PRSS21-001   | protease, serine, 21 (testisin)                                                       | protein_co | 9606 | 16:281722 | 21 |
| ENST000001PSD4-001     | pleckstrin and Sec7 domain containing 4                                               | protein_co | 9606 | 2:1131739 | 9  |
| ENST000001PSG4-003     | pregnancy specific beta-1-glycoprotein 4                                              | protein_co | 9606 | 19:431927 | 5  |
| ENST000001PSMA2-001    | proteasome (prosome, macropain) subunit, alpha type, 2                                | protein_co | 9606 | 7:4291685 | 41 |
| ENST000001PSMA3-001    | proteasome (prosome, macropain) subunit, alpha type, 3                                | protein_co | 9606 | 14:582448 | 42 |
| ENST000001PSMC4-001    | proteasome (prosome, macropain) 26S subunit, ATPase, 4                                | protein_co | 9606 | 19:399710 | 30 |
| ENST000001PSMD10-001   | proteasome (prosome, macropain) 26S subunit, non-ATPase, 10                           | protein_co | 9606 | X:1080842 | 40 |
| ENST000001PSMD5-001    | proteasome (prosome, macropain) 26S subunit, non-ATPase, 5                            | protein_co | 9606 | 9:1208160 | 42 |
| ENST000001PSMD7-001    | proteasome (prosome, macropain) 26S subunit, non-ATPase, 7                            | protein_co | 9606 | 16:742967 | 16 |
| ENST000001PSME1-001    | proteasome (prosome, macropain) activator subunit 1 (PA28 alpha)                      | protein_co | 9606 | 14:241361 | 44 |
| ENST000001PSME2-001    | proteasome (prosome, macropain) activator subunit 2 (PA28 beta)                       | protein_co | 9606 | 14:241433 | 9  |
| ENST000001PTGS1-002    | prostaglandin-endoperoxide synthase 1 (prostaglandin G/H synthase and cyclooxygenase) | protein_co | 9606 | 9:1223710 | 33 |
| ENST000001PTK6-201     | protein tyrosine kinase 6                                                             | protein_co | 9606 | 20:635284 | 18 |
| ENST000001PTK7-007     | protein tyrosine kinase 7                                                             | nonsense_  | 9606 | 6:4307634 | 14 |
| ENST000001PTPN18-001   | protein tyrosine phosphatase, non-receptor type 18 (brain-derived)                    | protein_co | 9606 | 2:1303560 | 31 |
| ENST000001PUS3-201     | pseudouridylylase synthase 3                                                          | protein_co | 9606 | 11:125893 | 10 |
| ENST000001PXPMP4-003   | peroxisomal membrane protein 4, 24kDa                                                 | protein_co | 9606 | 20:337074 | 32 |
| ENST000001PYCRL-001    | pyrroline-5-carboxylate reductase-like                                                | protein_co | 9606 | 8:1436039 | 30 |
| ENST000001PYGB-001     | phosphorylase, glycogen; brain                                                        | protein_co | 9606 | 20:252480 | 44 |
| ENST000001PYGL-001     | phosphorylase, glycogen, liver                                                        | protein_co | 9606 | 14:509052 | 31 |
| ENST000001PYROXD1-001  | pyridine nucleotide-disulphide oxidoreductase domain 1                                | protein_co | 9606 | 12:214376 | 5  |
| ENST000001QPCTL-001    | glutaminy-peptide cyclotransferase-like                                               | protein_co | 9606 | 19:456924 | 23 |
| ENST000001R3HDM1-001   | R3H domain containing-like                                                            | protein_co | 9606 | 20:443369 | 3  |
| ENST000001RAB29-002    | RAB29, member RAS oncogene family                                                     | protein_co | 9606 | 1:2057694 | 14 |
| ENST000001RAB35-001    | RAB35, member RAS oncogene family                                                     | protein_co | 9606 | 12:120095 | 43 |
| ENST000001RAB3D-001    | RAB3D, member RAS oncogene family                                                     | protein_co | 9606 | 19:113220 | 43 |
| ENST000001RAB3IP-003   | RAB3A interacting protein                                                             | protein_co | 9606 | 12:697386 | 3  |
| ENST000001RAB9A-002    | RAB9A, member RAS oncogene family                                                     | processed_ | 9606 | X:1368918 | 6  |
| ENST000001RABAC1-001   | Rab acceptor 1 (prenylated)                                                           | protein_co | 9606 | 19:419566 | 43 |
| ENST000001RABGGTA-002  | Rab geranylgeranyltransferase, alpha subunit                                          | protein_co | 9606 | 14:242655 | 16 |
| ENST000001RAD51AP1-002 | RAD51 associated protein 1                                                            | protein_co | 9606 | 12:453889 | 19 |
| ENST000001RALA-001     | v-ral simian leukemia viral oncogene homolog A (ras related)                          | protein_co | 9606 | 7:3962348 | 41 |
| ENST000001RALBP1-001   | ralA binding protein 1                                                                | protein_co | 9606 | 18:947500 | 19 |
| ENST000001RALGAPA2-008 | Ral GTPase activating protein, alpha subunit 2 (catalytic)                            | protein_co | 9606 | 20:203927 | 9  |
| ENST000001RANBP3-003   | RAN binding protein 3                                                                 | protein_co | 9606 | 19:591735 | 18 |
| ENST000001RANBP9-001   | RAN binding protein 9                                                                 | protein_co | 9606 | 6:1362149 | 38 |
| ENST000001RAP2A-001    | RAP2A, member of RAS oncogene family                                                  | protein_co | 9606 | 13:974342 | 43 |
| ENST000001RARS-001     | arginyl-tRNA synthetase                                                               | protein_co | 9606 | 5:1684864 | 39 |
| ENST000001RB1CC1-001   | RB1-inducible coiled-coil 1                                                           | protein_co | 9606 | 8:5262245 | 32 |
| ENST000001RBM22-001    | RNA binding motif protein 22                                                          | protein_co | 9606 | 5:1506907 | 39 |
| ENST000001RCN1-002     | reticulocalbin 1, EF-hand calcium binding domain                                      | protein_co | 9606 | 11:320909 | 39 |
| ENST000001RDH10-001    | retinol dehydrogenase 10 (all-trans)                                                  | protein_co | 9606 | 8:7329461 | 43 |
| ENST000001REEP1-001    | receptor accessory protein 1                                                          | protein_co | 9606 | 2:8621399 | 7  |
| ENST000001RFC2-002     | replication factor C (activator 1) 2, 40kDa                                           | protein_co | 9606 | 7:7423153 | 37 |
| ENST000001RF4-001      | regulatory factor X, 4 (influences HLA class II expression)                           | protein_co | 9606 | 12:106684 | 7  |
| ENST000001RGS17-201    | regulator of G-protein signaling 17                                                   | protein_co | 9606 | 6:1530107 | 37 |
| ENST000001RIF1-001     | replication timing regulatory factor 1                                                | protein_co | 9606 | 2:1514099 | 37 |
| ENST000001RIN3-001     | Ras and Rab interactor 3                                                              | protein_co | 9606 | 14:925137 | 30 |
| ENST000001RIPK2-001    | receptor-interacting serine-threonine kinase 2                                        | protein_co | 9606 | 8:8975774 | 41 |
| ENST000001RNASEH2A-001 | ribonuclease H2, subunit A                                                            | protein_co | 9606 | 19:128065 | 44 |
| ENST000001RNF103-001   | ring finger protein 103                                                               | protein_co | 9606 | 2:8660339 | 29 |
| ENST000001RNF11-001    | ring finger protein 11                                                                | protein_co | 9606 | 1:5123627 | 44 |
| ENST000001RNF19B-004   | ring finger protein 19B                                                               | protein_co | 9606 | 1:3293666 | 37 |
| ENST000001RNF8-004     | ring finger protein 8, E3 ubiquitin protein ligase                                    | nonsense_  | 9606 | 6:3735401 | 41 |
| ENST000001ROPN1-001    | rhopilin associated tail protein 1                                                    | protein_co | 9606 | 3:1239685 | 6  |
| ENST000001RP1-001      | retinitis pigmentosa 1 (autosomal dominant)                                           | protein_co | 9606 | 8:5461606 | 16 |
| ENST000001RP2-001      | retinitis pigmentosa 2 (X-linked recessive)                                           | protein_co | 9606 | X:4683694 | 42 |
| ENST000001RPAP3-001    | RNA polymerase II associated protein 3                                                | protein_co | 9606 | 12:476612 | 34 |
| ENST000001RPL18-006    | ribosomal protein L18                                                                 | protein_co | 9606 | 19:486153 | 40 |
| ENST000001RPL19-001    | ribosomal protein L19                                                                 | protein_co | 9606 | 17:392002 | 44 |
| ENST000001RPL3-001     | ribosomal protein L3                                                                  | protein_co | 9606 | 22:393128 | 40 |
| ENST000001RPLP0-201    | ribosomal protein, large, P0                                                          | protein_co | 9606 | 12:120196 | 16 |
| ENST000001RPN2-001     | ribophorin II                                                                         | protein_co | 9606 | 20:371790 | 43 |
| ENST000001RPS12-001    | ribosomal protein S12                                                                 | protein_co | 9606 | 6:1328144 | 42 |
| ENST000001RPS13-010    | ribosomal protein S13                                                                 | protein_co | 9606 | 11:170743 | 34 |
| ENST000001RPS15-006    | ribosomal protein S15                                                                 | protein_co | 9606 | 19:143835 | 11 |
| ENST000001RPS5-201     | ribosomal protein S5                                                                  | protein_co | 9606 | 19:583872 | 44 |
| ENST000001RPS6KB1-001  | ribosomal protein S6 kinase, 70kDa, polypeptide 1                                     | protein_co | 9606 | 17:598931 | 38 |
| ENST000001RPUSD1-001   | RNA pseudouridylylase synthase domain containing 1                                    | protein_co | 9606 | 16:784974 | 39 |
| ENST000001RRBP1-201    | ribosome binding protein 1                                                            | protein_co | 9606 | 20:176136 | 30 |
| ENST000001RRN3-001     | RRN3 RNA polymerase I transcription factor homolog (S. cerevisiae)                    | protein_co | 9606 | 16:150600 | 36 |
| ENST000001RSPH6A-001   | radial spoke head 6 homolog A (Chlamydomonas)                                         | protein_co | 9606 | 19:457957 | 6  |
| ENST000001RTCB-001     | RNA 2',3'-cyclic phosphate and 5'-OH ligase                                           | protein_co | 9606 | 22:323875 | 42 |
| ENST000001RTKN-004     | rhotekin                                                                              | protein_co | 9606 | 2:7442588 | 39 |
| ENST000001RTN2-001     | reticulin 2                                                                           | protein_co | 9606 | 19:454852 | 14 |

|                        |                                                                                                   |            |                |    |
|------------------------|---------------------------------------------------------------------------------------------------|------------|----------------|----|
| ENST000001RUVBL2-006   | RuvB-like AAA ATPase 2                                                                            | nonsense_  | 9606 19:489938 | 43 |
| ENST000001SAMD15-001   | sterile alpha motif domain containing 15                                                          | protein_co | 9606 14:773771 | 40 |
| ENST000001SARS-001     | seryl-tRNA synthetase                                                                             | protein_co | 9606 1:1092139 | 44 |
| ENST000001SARS2-001    | seryl-tRNA synthetase 2, mitochondrial                                                            | protein_co | 9606 19:389152 | 11 |
| ENST000001SART3-001    | squamous cell carcinoma antigen recognized by T cells 3                                           | protein_co | 9606 12:108522 | 28 |
| ENST000001SAYSD1-003   | SAYSVFN motif domain containing 1                                                                 | protein_co | 9606 6:3910406 | 41 |
| ENST000001SCRN1-001    | secernin 1                                                                                        | protein_co | 9606 7:2992010 | 41 |
| ENST000001SEC61A1-001  | Sec61 alpha 1 subunit ( <i>S. cerevisiae</i> )                                                    | protein_co | 9606 3:1280523 | 40 |
| ENST000001SELPGLG-002  | selectin P ligand                                                                                 | protein_co | 9606 12:108622 | 5  |
| ENST000001SEMA3F-001   | sema domain, immunoglobulin domain (Ig), short basic domain, secreted, (semaphorin) 3F            | protein_co | 9606 3:5015512 | 15 |
| ENST000001SERPIND1-001 | serpin peptidase inhibitor, clade D (heparin cofactor), member 1                                  | protein_co | 9606 22:207738 | 34 |
| ENST000001SERPINE1-001 | serpin peptidase inhibitor, clade E (nexin, plasminogen activator inhibitor type 1), member 1     | protein_co | 9606 7:1011270 | 43 |
| ENST000001SETX-001     | senataxin                                                                                         | protein_co | 9606 9:1322613 | 39 |
| ENST000001SF1-002      | splicing factor 1                                                                                 | protein_co | 9606 11:647646 | 31 |
| ENST000001SF3A1-001    | splicing factor 3a, subunit 1, 120kDa                                                             | protein_co | 9606 22:303319 | 42 |
| ENST000001SF3B6-001    | splicing factor 3b, subunit 6, 14kDa                                                              | protein_co | 9606 2:2406758 | 44 |
| ENST000001SFXN3-201    | sideroflexin 3                                                                                    | protein_co | 9606 10:101031 | 42 |
| ENST000001SGCG-001     | sarcoglycan, gamma (35kDa dystrophin-associated glycoprotein)                                     | protein_co | 9606 13:231809 | 22 |
| ENST000001SGK1-009     | serum/glucocorticoid regulated kinase 1                                                           | protein_co | 9606 6:1341692 | 38 |
| ENST000001SGTA-001     | small glutamine-rich tetratricopeptide repeat (TPR)-containing, alpha                             | protein_co | 9606 19:275471 | 44 |
| ENST000001SH3TC1-001   | SH3 domain and tetratricopeptide repeats 1                                                        | protein_co | 9606 4:8199367 | 38 |
| ENST000001SHPK-001     | sedoheptulokinase                                                                                 | protein_co | 9606 17:360826 | 43 |
| ENST000001SIKE1-001    | suppressor of IKBKE 1                                                                             | protein_co | 9606 1:1147727 | 4  |
| ENST000001SIPA1L3-001  | signal-induced proliferation-associated 1 like 3                                                  | protein_co | 9606 19:379072 | 43 |
| ENST000001SIRT1-001    | sirtuin 1                                                                                         | protein_co | 9606 10:678846 | 40 |
| ENST000001SIRT4-001    | sirtuin 4                                                                                         | protein_co | 9606 12:120302 | 36 |
| ENST000001SIX1-001     | SIX homeobox 1                                                                                    | protein_co | 9606 14:606434 | 43 |
| ENST000001SIX4-001     | SIX homeobox 4                                                                                    | protein_co | 9606 14:607095 | 30 |
| ENST000001SLC10A2-001  | solute carrier family 10 (sodium/bile acid cotransporter), member 2                               | protein_co | 9606 13:103043 | 7  |
| ENST000001SLC11A1-001  | solute carrier family 11 (proton-coupled divalent metal ion transporter), member 1                | protein_co | 9606 2:2183820 | 33 |
| ENST000001SLC19A2-001  | solute carrier family 19 (thiamine transporter), member 2                                         | protein_co | 9606 1:1694639 | 42 |
| ENST000001SLC1A4-001   | solute carrier family 1 (glutamate/neutral amino acid transporter), member 4                      | protein_co | 9606 2:6498940 | 42 |
| ENST000001SLC22A4-001  | solute carrier family 22 (organic cation/zwitterion transporter), member 4                        | protein_co | 9606 5:1322944 | 35 |
| ENST000001SLC22A5-001  | solute carrier family 22 (organic cation/carnitine transporter), member 5                         | protein_co | 9606 5:1323697 | 25 |
| ENST000001SLC25A2-001  | solute carrier family 25 (mitochondrial carrier; ornithine transporter) member 2                  | protein_co | 9606 5:1413026 | 19 |
| ENST000001SLC25A39-001 | solute carrier family 25, member 39                                                               | protein_co | 9606 17:443196 | 43 |
| ENST000001SLC25A43-001 | solute carrier family 25, member 43                                                               | protein_co | 9606 X:1193990 | 38 |
| ENST000001SLC35C2-002  | solute carrier family 35 (GDP-fucose transporter), member C2                                      | protein_co | 9606 20:463495 | 14 |
| ENST000001SLC35D1-001  | solute carrier family 35 (UDP-GlcA/UDP-GalNAc transporter), member D1                             | protein_co | 9606 1:6699933 | 44 |
| ENST000001SLC35F5-001  | solute carrier family 35, member F5                                                               | protein_co | 9606 2:1137127 | 23 |
| ENST000001SLC38A7-001  | solute carrier family 38, member 7                                                                | protein_co | 9606 16:586651 | 25 |
| ENST000001SLC39A9-013  | solute carrier family 39, member 9                                                                | protein_co | 9606 14:693986 | 28 |
| ENST000001SLC44A4-001  | solute carrier family 44, member 4                                                                | protein_co | 9606 6:3186319 | 15 |
| ENST000001SLC7A2-201   | solute carrier family 7 (cationic amino acid transporter, y+ system), member 2                    | protein_co | 9606 8:1753877 | 11 |
| ENST000001SLC7A6-001   | solute carrier family 7 (amino acid transporter light chain, y+1 system), member 6                | protein_co | 9606 16:682645 | 36 |
| ENST000001SLCO4A1-201  | solute carrier organic anion transporter family, member 4A1                                       | protein_co | 9606 20:626424 | 23 |
| ENST000001SLURP1-001   | secreted LY6/PLAUR domain containing 1                                                            | protein_co | 9606 8:1427409 | 3  |
| ENST000001SMARCD2-002  | SWI/SNF related, matrix associated, actin dependent regulator of chromatin, subfamily d, member 2 | protein_co | 9606 17:638326 | 12 |
| ENST000001SMIM8-001    | small integral membrane protein 8                                                                 | protein_co | 9606 6:8732259 | 36 |
| ENST000001SMUG1-008    | single-strand-selective monofunctional uracil-DNA glycosylase 1                                   | protein_co | 9606 12:541814 | 35 |
| ENST000001SNAI1-001    | snail family zinc finger 1                                                                        | protein_co | 9606 20:499829 | 41 |
| ENST000001SNAP29-001   | synaptosomal-associated protein, 29kDa                                                            | protein_co | 9606 22:208589 | 39 |
| ENST000001SNRNP27-001  | small nuclear ribonucleoprotein 27kDa (U4/U6.U5)                                                  | protein_co | 9606 2:6989356 | 3  |
| ENST000001SNRNP70-003  | small nuclear ribonucleoprotein 70kDa (U1)                                                        | protein_co | 9606 19:490854 | 38 |
| ENST000001SNRPA-001    | small nuclear ribonucleoprotein polypeptide A                                                     | protein_co | 9606 19:407508 | 38 |
| ENST000001SNRPB2-001   | small nuclear ribonucleoprotein polypeptide B                                                     | protein_co | 9606 20:167299 | 6  |
| ENST000001SNRPC-001    | small nuclear ribonucleoprotein polypeptide C                                                     | protein_co | 9606 6:3475740 | 43 |
| ENST000001SNRPD3-001   | small nuclear ribonucleoprotein D3 polypeptide 18kDa                                              | protein_co | 9606 22:245555 | 32 |
| ENST000001SNTA1-001    | syntrophin, alpha 1                                                                               | protein_co | 9606 20:334079 | 42 |
| ENST000001SNX17-001    | sorting nexin 17                                                                                  | protein_co | 9606 2:2737052 | 42 |
| ENST000001SNX3-001     | sorting nexin 3                                                                                   | protein_co | 9606 6:1082112 | 43 |
| ENST000001SOGA1-005    | suppressor of glucose, autophagy associated 1                                                     | protein_co | 9606 20:367774 | 39 |
| ENST000001SOS2-001     | son of sevenless homolog 2 ( <i>Drosophila</i> )                                                  | protein_co | 9606 14:501171 | 40 |
| ENST000001SOX4-001     | SRY (sex determining region Y)-box 4                                                              | protein_co | 9606 6:2159276 | 43 |
| ENST000001SP140L-201   | SP140 nuclear body protein-like                                                                   | protein_co | 9606 2:2303272 | 7  |
| ENST000001SPAG7-001    | sperm associated antigen 7                                                                        | protein_co | 9606 17:495922 | 42 |
| ENST000001SPARC-001    | secreted protein, acidic, cysteine-rich (osteonectin)                                             | protein_co | 9606 5:1516610 | 27 |
| ENST000001SPATA20-001  | spermatogenesis associated 20                                                                     | protein_co | 9606 17:505470 | 29 |
| ENST000001SPG21-001    | spastic paraplegia 21 (autosomal recessive, Mast syndrome)                                        | protein_co | 9606 15:649630 | 36 |
| ENST000001SPTLC2-001   | serine palmitoyltransferase, long chain base subunit 2                                            | protein_co | 9606 14:775059 | 44 |
| ENST000001SRGN-001     | serglycin                                                                                         | protein_co | 9606 10:690881 | 44 |
| ENST000001SRP54-201    | signal recognition particle 54kDa                                                                 | protein_co | 9606 14:349828 | 41 |
| ENST000001SRRD-001     | SRR1 domain containing                                                                            | protein_co | 9606 22:264838 | 27 |
| ENST000001SRSF6-001    | serine/arginine-rich splicing factor 6                                                            | protein_co | 9606 20:434579 | 40 |
| ENST000001SRSF9-001    | serine/arginine-rich splicing factor 9                                                            | protein_co | 9606 12:120461 | 42 |
| ENST000001SS18L2-201   | synovial sarcoma translocation gene on chromosome 18-like 2                                       | protein_co | 9606 3:4259080 | 17 |
| ENST000001SSPN-001     | sarcospan                                                                                         | protein_co | 9606 12:261954 | 5  |
| ENST000001SSR1-001     | signal sequence receptor, alpha                                                                   | protein_co | 9606 6:7281143 | 29 |
| ENST000001ST13-001     | suppression of tumorigenicity 13 (colon carcinoma) (Hsp70 interacting protein)                    | protein_co | 9606 22:408245 | 21 |
| ENST000001ST3GAL4-008  | ST3 beta-galactoside alpha-2,3-sialyltransferase 4                                                | protein_co | 9606 11:126355 | 19 |
| ENST000001ST6GAL1-001  | ST6 beta-galactosamide alpha-2,6-sialyltransferase 1                                              | protein_co | 9606 3:1869304 | 28 |
| ENST000001STAG2-006    | stromal antigen 2                                                                                 | protein_co | 9606 X:1239605 | 3  |
| ENST000001STARD3NL-001 | STARD3 N-terminal like                                                                            | protein_co | 9606 7:3817822 | 41 |
| ENST000001STATH-001    | statherin                                                                                         | protein_co | 9606 4:6999593 | 3  |



|                         |                                                                                    |            |                 |    |
|-------------------------|------------------------------------------------------------------------------------|------------|-----------------|----|
| ENST000001STK10-001     | serine/threonine kinase 10                                                         | protein_co | 9606 5:1720420  | 39 |
| ENST000001STK38-001     | serine/threonine kinase 38                                                         | protein_co | 9606 6:3649389  | 43 |
| ENST000001STRADB-001    | STE20-related kinase adaptor beta                                                  | protein_co | 9606 2:2014516  | 17 |
| ENST000001STS-001       | steroid sulfatase (microsomal), isozyme S                                          | protein_co | 9606 X:7219456  | 29 |
| ENST000001STUB1-001     | STIP1 homology and U-box containing protein 1, E3 ubiquitin protein ligase         | protein_co | 9606 16:680276  | 9  |
| ENST000001STX10-004     | syntaxin 10                                                                        | protein_co | 9606 19:131440  | 19 |
| ENST000001STX1A-001     | syntaxin 1A (brain)                                                                | protein_co | 9606 7:7369920  | 6  |
| ENST000001STXBP2-001    | syntaxin binding protein 2                                                         | protein_co | 9606 19:763711  | 34 |
| ENST000001STYK1-001     | serine/threonine/tyrosine kinase 1                                                 | protein_co | 9606 12:106189  | 37 |
| ENST000001SUGP1-001     | SURP and G patch domain containing 1                                               | protein_co | 9606 19:192765  | 7  |
| ENST000001SULT1E1-001   | sulfotransferase family 1E, estrogen-preferring, member 1                          | protein_co | 9606 4:6984121  | 43 |
| ENST000001SUPT16H-001   | suppressor of Ty 16 homolog (S. cerevisiae)                                        | protein_co | 9606 14:213514  | 43 |
| ENST000001SYDE2-001     | synapse defective 1, Rho GTPase, homolog 2 (C. elegans)                            | retained_i | 9606 1:8518115  | 36 |
| ENST000001SYMPK-001     | symplekin                                                                          | protein_co | 9606 19:458154  | 34 |
| ENST000001SYNGR1-006    | synaptogyrin 1                                                                     | protein_co | 9606 22:393499  | 7  |
| ENST000001SYNGR2-001    | synaptogyrin 2                                                                     | protein_co | 9606 17:781685  | 19 |
| ENST000001SYPL1-001     | synaptophysin-like 1                                                               | protein_co | 9606 7:1060905  | 13 |
| ENST000001SYS1-001      | Sys1 golgi trafficking protein                                                     | protein_co | 9606 20:453630  | 30 |
| ENST000001TAB1-001      | TGF-beta activated kinase 1/MAP3K7 binding protein 1                               | protein_co | 9606 22:393997  | 41 |
| ENST000001TARBP1-001    | TAR (HIV-1) RNA binding protein 1                                                  | protein_co | 9606 1:2343913  | 40 |
| ENST000001TARDBP-001    | TAR DNA binding protein                                                            | protein_co | 9606 1:1101240  | 17 |
| ENST000001TAS2R3-001    | taste receptor, type 2, member 3                                                   | protein_co | 9606 7:1417640  | 25 |
| ENST000001TAS2R7-001    | taste receptor, type 2, member 7                                                   | protein_co | 9606 12:108015  | 7  |
| ENST000001TAS2R8-001    | taste receptor, type 2, member 8                                                   | protein_co | 9606 12:108060  | 7  |
| ENST000001TAS2R9-001    | taste receptor, type 2, member 9                                                   | protein_co | 9606 12:108091  | 9  |
| ENST000001TAX1BP3-001   | Tax1 (human T-cell leukemia virus type I) binding protein 3                        | protein_co | 9606 17:366290  | 43 |
| ENST000001TBC1D12-001   | TBC1 domain family, member 12                                                      | protein_co | 9606 10:944025  | 42 |
| ENST000001TBC1D17-001   | TBC1 domain family, member 17                                                      | protein_co | 9606 19:498774  | 30 |
| ENST000001TBL1X-003     | transducin (beta)-like 1X-linked                                                   | protein_co | 9606 X:9465008  | 17 |
| ENST000001TBP-001       | TATA box binding protein                                                           | protein_co | 9606 6:1705543  | 30 |
| ENST000001TBPL2-001     | TATA box binding protein like 2                                                    | protein_co | 9606 14:554135  | 3  |
| ENST000001TBX15-001     | T-box 15                                                                           | protein_co | 9606 1:1188830  | 10 |
| ENST000001TCEAL3-201    | transcription elongation factor A (SII)-like 3                                     | protein_co | 9606 X:1036079  | 24 |
| ENST000001TCEANC2-001   | transcription elongation factor A (SII) N-terminal and central domain containing 2 | protein_co | 9606 1:5405360  | 39 |
| ENST000001TCFL5-201     | transcription factor-like 5 (basic helix-loop-helix)                               | protein_co | 9606 20:628451  | 13 |
| ENST000001TFG-001       | TRK-fused gene                                                                     | protein_co | 9606 3:1007094  | 36 |
| ENST000001TFPI-201      | tissue factor pathway inhibitor (lipoprotein-associated coagulation inhibitor)     | protein_co | 9606 2:1874642  | 17 |
| ENST000001TGFB1-001     | transforming growth factor, beta 1                                                 | protein_co | 9606 14:713303  | 43 |
| ENST000001TGFB3-001     | transforming growth factor, beta 3                                                 | protein_co | 9606 14:759582  | 30 |
| ENST000001TGFB3-201     | transforming growth factor, beta receptor III                                      | protein_co | 9606 1:9168034  | 37 |
| ENST000001THG1L-001     | tRNA-histidine guanylyltransferase 1-like (S. cerevisiae)                          | protein_co | 9606 5:1577311  | 39 |
| ENST000001THOC2-201     | THO complex 2                                                                      | protein_co | 9606 X:1236005  | 32 |
| ENST000001THPO-001      | thrombopoietin                                                                     | protein_co | 9606 3:1843719  | 9  |
| ENST000001TIMELESS-002  | timeless circadian clock                                                           | protein_co | 9606 12:564171  | 42 |
| ENST000001TIMM21-001    | translocase of inner mitochondrial membrane 21 homolog (yeast)                     | protein_co | 9606 18:741485  | 8  |
| ENST000001TMED1-001     | transmembrane emp24 protein transport domain containing 1                          | protein_co | 9606 19:108324  | 24 |
| ENST000001TMED8-001     | transmembrane emp24 protein transport domain containing 8                          | protein_co | 9606 14:713350  | 44 |
| ENST000001TMEM101-201   | transmembrane protein 101                                                          | protein_co | 9606 17:440111  | 42 |
| ENST000001TMEM109-001   | transmembrane protein 109                                                          | protein_co | 9606 11:609138  | 41 |
| ENST000001TMEM131-001   | transmembrane protein 131                                                          | protein_co | 9606 2:9775634  | 41 |
| ENST000001TMEM14A-001   | transmembrane protein 14A                                                          | protein_co | 9606 6:5267110  | 43 |
| ENST000001TMEM14C-001   | transmembrane protein 14C                                                          | protein_co | 9606 6:1072297  | 42 |
| ENST000001TMEM159-001   | transmembrane protein 159                                                          | protein_co | 9606 16:211583  | 9  |
| ENST000001TMEM161A-004  | transmembrane protein 161A                                                         | protein_co | 9606 19:191196  | 41 |
| ENST000001TMEM214-001   | transmembrane protein 214                                                          | protein_co | 9606 2:2703295  | 44 |
| ENST000001TMEM30A-002   | transmembrane protein 30A                                                          | protein_co | 9606 6:7525292  | 39 |
| ENST000001TMEM59-001    | transmembrane protein 59                                                           | protein_co | 9606 1:5403167  | 43 |
| ENST000001TMEM97-001    | transmembrane protein 97                                                           | protein_co | 9606 17:283190  | 40 |
| ENST000001TMX4-001      | thioredoxin-related transmembrane protein 4                                        | protein_co | 9606 20:797734  | 41 |
| ENST000001TNFAIP1-001   | tumor necrosis factor, alpha-induced protein 1 (endothelial)                       | protein_co | 9606 17:283357  | 42 |
| ENST000001TNFRSF10A-001 | tumor necrosis factor receptor superfamily, member 10a                             | protein_co | 9606 8:2319045  | 42 |
| ENST000001TNFRSF1A-001  | tumor necrosis factor receptor superfamily, member 1A                              | protein_co | 9606 12:632875  | 42 |
| ENST000001TNNC1-001     | troponin C type 1 (slow)                                                           | protein_co | 9606 3:5245110  | 15 |
| ENST000001TNS1-001      | tensin 1                                                                           | protein_co | 9606 2:2177997  | 7  |
| ENST000001TOMM22-001    | translocase of outer mitochondrial membrane 22 homolog (yeast)                     | protein_co | 9606 22:386819  | 43 |
| ENST000001TRAF2-007     | TNF receptor-associated factor 2                                                   | protein_co | 9606 9:1368865  | 42 |
| ENST000001TRAM2-001     | translocation associated membrane protein 2                                        | protein_co | 9606 6:5249740  | 43 |
| ENST000001TRAP1-001     | TNF receptor-associated protein 1                                                  | protein_co | 9606 16:365803  | 40 |
| ENST000001TRIB3-001     | tribbles pseudokinase 3                                                            | protein_co | 9606 20:380617  | 43 |
| ENST000001TRIM23-001    | tripartite motif containing 23                                                     | protein_co | 9606 5:6558968  | 39 |
| ENST000001TRIP13-001    | thyroid hormone receptor interactor 13                                             | protein_co | 9606 5:892643-5 | 38 |
| ENST000001TRIP6-001     | thyroid hormone receptor interactor 6                                              | protein_co | 9606 7:1008671  | 36 |
| ENST000001TRMT6-001     | tRNA methyltransferase 6 homolog (S. cerevisiae)                                   | protein_co | 9606 20:593783  | 40 |
| ENST000001TRPM5-001     | transient receptor potential cation channel, subfamily M, member 5                 | protein_co | 9606 11:240451  | 4  |
| ENST000001TRPS1-002     | trichorhinophalangeal syndrome I                                                   | protein_co | 9606 8:1154125  | 27 |
| ENST000001TSPAN12-001   | tetraspanin 12                                                                     | protein_co | 9606 7:1207873  | 31 |
| ENST000001TSPAN8-002    | tetraspanin 8                                                                      | protein_co | 9606 12:711251  | 21 |
| ENST000001TSPAN9-001    | tetraspanin 9                                                                      | protein_co | 9606 12:307737  | 41 |
| ENST000001TTC1-001      | tetratricopeptide repeat domain 1                                                  | protein_co | 9606 5:1600091  | 41 |
| ENST000001TTC17-001     | tetratricopeptide repeat domain 17                                                 | protein_co | 9606 11:433589  | 16 |
| ENST000001TTC31-001     | tetratricopeptide repeat domain 31                                                 | protein_co | 9606 2:7448308  | 20 |
| ENST000001TTL-001       | tubulin tyrosine ligase                                                            | protein_co | 9606 2:1124821  | 25 |
| ENST000001TLL12-001     | tubulin tyrosine ligase-like family, member 12                                     | protein_co | 9606 22:431666  | 42 |
| ENST000001TLL2-001      | tubulin tyrosine ligase-like family, member 2                                      | protein_co | 9606 6:1673250  | 9  |

|                       |                                                                               |            |                |    |
|-----------------------|-------------------------------------------------------------------------------|------------|----------------|----|
| ENST000001TWIST1-001  | twist family bHLH transcription factor 1                                      | protein_co | 9606 7:1911546 | 21 |
| ENST000001TWISTNB-001 | TWIST neighbor                                                                | protein_co | 9606 7:1969546 | 42 |
| ENST000001TYRL-002    | tyrosinase-like (pseudogene)                                                  | unprocess  | 9606 11:494050 | 2  |
| ENST000001UBA2-001    | ubiquitin-like modifier activating enzyme 2                                   | protein_co | 9606 19:344283 | 32 |
| ENST000001UBR5-002    | ubiquitin protein ligase E3 component n-recogin 5                             | protein_co | 9606 8:1022537 | 33 |
| ENST000001UBR7-001    | ubiquitin protein ligase E3 component n-recogin 7 (putative)                  | protein_co | 9606 14:932070 | 25 |
| ENST000001UMPS-001    | uridine monophosphate synthetase                                              | protein_co | 9606 3:1247303 | 41 |
| ENST000001UNC13D-001  | unc-13 homolog D (C. elegans)                                                 | protein_co | 9606 17:758272 | 41 |
| ENST000001UNG-001     | uracil-DNA glycosylase                                                        | protein_co | 9606 12:109097 | 36 |
| ENST000001UNKL-201    | unkempt family zinc finger-like                                               | protein_co | 9606 16:136320 | 4  |
| ENST000001UQCRC1-001  | ubiquinol-cytochrome c reductase core protein I                               | protein_co | 9606 3:4859900 | 35 |
| ENST000001UROD-001    | uroporphyrinogen decarboxylase                                                | protein_co | 9606 1:4501214 | 44 |
| ENST000001USP10-001   | ubiquitin specific peptidase 10                                               | protein_co | 9606 16:846999 | 27 |
| ENST000001USP11-201   | ubiquitin specific peptidase 11                                               | protein_co | 9606 X:4723286 | 43 |
| ENST000001USP18-001   | ubiquitin specific peptidase 18                                               | protein_co | 9606 22:181498 | 43 |
| ENST000001USP28-001   | ubiquitin specific peptidase 28                                               | protein_co | 9606 11:113797 | 17 |
| ENST000001USP31-001   | ubiquitin specific peptidase 31                                               | protein_co | 9606 16:230614 | 41 |
| ENST000001USP5-001    | ubiquitin specific peptidase 5 (isopeptidase T)                               | protein_co | 9606 12:685212 | 37 |
| ENST000001UTP18-001   | UTP18 small subunit (SSU) processome component homolog (yeast)                | protein_co | 9606 17:512605 | 41 |
| ENST000001VAMP3-001   | vesicle-associated membrane protein 3                                         | protein_co | 9606 1:7771269 | 44 |
| ENST000001VASH1-001   | vasohibin 1                                                                   | protein_co | 9606 14:767621 | 41 |
| ENST000001VASP-001    | vasodilator-stimulated phosphoprotein                                         | protein_co | 9606 19:455074 | 44 |
| ENST000001VAX2-001    | ventral anterior homeobox 2                                                   | protein_co | 9606 2:7090059 | 40 |
| ENST000001VCL-201     | vinculin                                                                      | protein_co | 9606 10:739981 | 39 |
| ENST000001VDAC3-003   | voltage-dependent anion channel 3                                             | protein_co | 9606 8:4239190 | 43 |
| ENST000001VDR-201     | vitamin D (1,25-dihydroxyvitamin D3) receptor                                 | protein_co | 9606 12:478415 | 7  |
| ENST000001VIM-001     | vimentin                                                                      | protein_co | 9606 10:172292 | 44 |
| ENST000001VPS13D-014  | vacuolar protein sorting 13 homolog D (S. cerevisiae)                         | protein_co | 9606 1:1227712 | 38 |
| ENST000001VPS18-001   | vacuolar protein sorting 18 homolog (S. cerevisiae)                           | protein_co | 9606 15:408944 | 44 |
| ENST000001VPS4B-001   | vacuolar protein sorting 4 homolog B (S. cerevisiae)                          | protein_co | 9606 18:633891 | 41 |
| ENST000001VSIG1-001   | V-set and immunoglobulin domain containing 1                                  | protein_co | 9606 X:1080450 | 32 |
| ENST000001VTI1B-002   | vesicle transport through interaction with t-SNAREs 1B                        | nonsense_  | 9606 14:676512 | 14 |
| ENST000001WARS2-001   | tryptophanyl tRNA synthetase 2, mitochondrial                                 | protein_co | 9606 1:1190312 | 41 |
| ENST000001WDFY1-001   | WD repeat and FYVE domain containing 1                                        | protein_co | 9606 2:2238753 | 43 |
| ENST000001WDR24-201   | WD repeat domain 24                                                           | protein_co | 9606 16:684734 | 35 |
| ENST000001WDR77-001   | WD repeat domain 77                                                           | protein_co | 9606 1:1114398 | 31 |
| ENST000001WFS1-001    | Wolfram syndrome 1 (wolframin)                                                | protein_co | 9606 4:6269850 | 41 |
| ENST000001WNK4-001    | WNK lysine deficient protein kinase 4                                         | protein_co | 9606 17:427806 | 20 |
| ENST000001XBP1-001    | X-box binding protein 1                                                       | protein_co | 9606 22:287945 | 33 |
| ENST000001XYLB-001    | xylulokinase homolog (H. influenzae)                                          | protein_co | 9606 3:3834677 | 41 |
| ENST000001YBX3-001    | Y box binding protein 3                                                       | protein_co | 9606 12:106992 | 25 |
| ENST000001YIPF1-201   | Yip1 domain family, member 1                                                  | protein_co | 9606 1:5385172 | 18 |
| ENST000001YKT6-001    | YKT6 v-SNARE homolog (S. cerevisiae)                                          | protein_co | 9606 7:4420104 | 43 |
| ENST000001YTHDC2-001  | YTH domain containing 2                                                       | protein_co | 9606 5:1135136 | 41 |
| ENST000001YWHAQ-001   | tyrosine 3-monooxygenase/tryptophan 5-monooxygenase activation protein, theta | protein_co | 9606 2:9583972 | 44 |
| ENST000001ZBTB47-002  | zinc finger and BTB domain containing 47                                      | protein_co | 9606 3:4265368 | 32 |
| ENST000001ZC3H13-001  | zinc finger CCCH-type containing 13                                           | protein_co | 9606 13:459544 | 24 |
| ENST000001ZC3HAV1-001 | zinc finger CCCH-type, antiviral 1                                            | protein_co | 9606 7:1390435 | 43 |
| ENST000001ZFP64-003   | ZFP64 zinc finger protein                                                     | protein_co | 9606 20:521512 | 10 |
| ENST000001ZFY-201     | zinc finger protein, Y-linked                                                 | protein_co | 9606 Y:2935477 | 13 |
| ENST000001ZNF141-001  | zinc finger protein 141                                                       | protein_co | 9606 4:337835  | 22 |
| ENST000001ZNF211-007  | zinc finger protein 211                                                       | protein_co | 9606 19:576332 | 13 |
| ENST000001ZNF263-001  | zinc finger protein 263                                                       | protein_co | 9606 16:328294 | 33 |
| ENST000001ZNF268-002  | zinc finger protein 268                                                       | protein_co | 9606 12:133181 | 22 |
| ENST000001ZNF317-001  | zinc finger protein 317                                                       | protein_co | 9606 19:914038 | 42 |
| ENST000001ZNF415-001  | zinc finger protein 415                                                       | protein_co | 9606 19:531078 | 10 |
| ENST000001ZNF468-002  | zinc finger protein 468                                                       | protein_co | 9606 19:528385 | 22 |
| ENST000001ZNF500-001  | zinc finger protein 500                                                       | protein_co | 9606 16:474823 | 31 |
| ENST000001ZNF510-201  | zinc finger protein 510                                                       | protein_co | 9606 9:9675586 | 33 |
| ENST000001ZNF549-002  | zinc finger protein 549                                                       | protein_co | 9606 19:575273 | 21 |
| ENST000001ZPR1-001    | ZPR1 zinc finger                                                              | protein_co | 9606 11:116777 | 44 |
| ENST000001ZW10-001    | zw10 kinetochore protein                                                      | protein_co | 9606 11:113733 | 41 |

**Table S7. Angiogenes\_specific Heart not Liver**

| Accession       | Name                | Description                                                                    | Biotype                 | Tax ID | Location     | # of Detections |
|-----------------|---------------------|--------------------------------------------------------------------------------|-------------------------|--------|--------------|-----------------|
| ENST00000607639 | 5S_rRNA.1-212       | 5S ribosomal RNA                                                               | rRNA                    | 9606   | 14:676571 1  |                 |
| ENST00000539547 | A2ML1-004           | alpha-2-macroglobulin-like 1                                                   | protein_coding          | 9606   | 12:884500 1  |                 |
| ENST00000570932 | AATK-003            | apoptosis-associated tyrosine kinase                                           | nonsense_mediated_decay | 9606   | 17:811172 4  |                 |
| ENST00000615488 | ABC7-481722F1.1-001 |                                                                                | processed_pseudogene    | 9606   | 7:37032-3; 1 |                 |
| ENST00000494046 | ABCA2-017           | ATP-binding cassette, sub-family A (ABC1), member 2                            | retained_intron         | 9606   | 9:1370201 2  |                 |
| ENST00000529442 | ABCA7-009           | ATP-binding cassette, sub-family A (ABC1), member 7                            | nonsense_mediated_decay | 9606   | 19:105692 2  |                 |
| ENST00000295750 | ABCB6-005           | ATP-binding cassette, sub-family B (MDR/TAP), member 6 (Langereis blood group) | protein_coding          | 9606   | 2:2192097 2  |                 |
| ENST00000372515 | ABCC10-009          | ATP-binding cassette, sub-family C (CFTR/MRP), member 10                       | protein_coding          | 9606   | 6:4342736 1  |                 |
| ENST00000556119 | ABCD4-020           | ATP-binding cassette, sub-family D (ALD), member 4                             | nonsense_mediated_decay | 9606   | 14:742923 2  |                 |
| ENST00000405322 | ABCG5-002           | ATP-binding cassette, sub-family G (WHITE), member 5                           | protein_coding          | 9606   | 2:4381256 1  |                 |
| ENST00000450061 | AC000099.1-002      |                                                                                | antisense               | 9606   | 7:1272151 1  |                 |
| ENST00000434698 | AC000374.1-001      |                                                                                | processed_pseudogene    | 9606   | 7:1265111 1  |                 |
| ENST00000413406 | AC004014.3-001      |                                                                                | lincRNA                 | 9606   | 7:1089094 4  |                 |
| ENST00000563823 | AC004158.2-006      |                                                                                | lincRNA                 | 9606   | 16:725233 2  |                 |
| ENST00000456537 | AC004448.5-001      |                                                                                | lincRNA                 | 9606   | 17:194391 2  |                 |
| ENST00000421862 | AC004540.5-004      |                                                                                | lincRNA                 | 9606   | 7:2639860 2  |                 |
| ENST00000418764 | AC004543.2-001      |                                                                                | lincRNA                 | 9606   | 7:1981368 2  |                 |
| ENST00000448783 | AC005041.11-001     |                                                                                | processed_pseudogene    | 9606   | 2:7441302 1  |                 |
| ENST00000456995 | AC005229.5-001      |                                                                                | processed_pseudogene    | 9606   | 7:1485804 1  |                 |
| ENST00000592716 | AC005307.3-005      |                                                                                | lincRNA                 | 9606   | 19:284376 2  |                 |
| ENST00000620402 | AC005412.1-201      |                                                                                | miRNA                   | 9606   | 17:293011 2  |                 |
| ENST00000431878 | AC005722.4-001      |                                                                                | processed_pseudogene    | 9606   | 17:197552 1  |                 |
| ENST00000582731 | AC005926.1-201      |                                                                                | miRNA                   | 9606   | X:3031508 2  |                 |
| ENST00000616497 | AC006288.1-201      |                                                                                | miRNA                   | 9606   | 9:1195116 2  |                 |
| ENST00000410616 | AC006534.1-201      |                                                                                | miRNA                   | 9606   | 17:678135 2  |                 |
| ENST00000614674 | AC006534.3-201      |                                                                                | miRNA                   | 9606   | 17:677205 4  |                 |
| ENST00000447461 | AC007327.6-001      |                                                                                | processed_pseudogene    | 9606   | 7:3622862 1  |                 |
| ENST00000620982 | AC007339.2-201      |                                                                                | miRNA                   | 9606   | 16:496801 2  |                 |
| ENST00000418591 | AC007563.1-001      |                                                                                | lincRNA                 | 9606   | 2:2168704 1  |                 |
| ENST00000447289 | AC007563.5-001      |                                                                                | antisense               | 9606   | 2:2166944 1  |                 |
| ENST00000434390 | AC008079.9-001      |                                                                                | antisense               | 9606   | 22:181780 1  |                 |
| ENST00000424916 | AC008163.6-001      |                                                                                | processed_pseudogene    | 9606   | 7:8146303 1  |                 |
| ENST00000439653 | AC008175.1-002      |                                                                                | lincRNA                 | 9606   | Y:2248053 4  |                 |
| ENST00000408143 | AC008625.1-201      |                                                                                | miRNA                   | 9606   | 5:1543400 2  |                 |
| ENST00000458850 | AC009009.1-201      |                                                                                | miRNA                   | 9606   | 5:1357131 2  |                 |
| ENST00000413944 | AC010091.1-002      |                                                                                | lincRNA                 | 9606   | 7:8157638 1  |                 |
| ENST00000597623 | AC010127.3-002      |                                                                                | antisense               | 9606   | 2:1659574 2  |                 |
| ENST00000581768 | AC010311.1-201      |                                                                                | miRNA                   | 9606   | 19:716042 2  |                 |
| ENST00000577852 | AC010323.1-201      |                                                                                | miRNA                   | 9606   | 19:834601 2  |                 |
| ENST00000416320 | AC010492.5-001      |                                                                                | processed_pseudogene    | 9606   | 19:542680 2  |                 |
| ENST00000417035 | AC010740.1-001      |                                                                                | processed_pseudogene    | 9606   | 2:1408984 1  |                 |
| ENST00000448431 | AC010744.1-001      |                                                                                | lincRNA                 | 9606   | 2:8352281 2  |                 |
| ENST00000407635 | AC011298.2-001      |                                                                                | lincRNA                 | 9606   | 2:2406863 2  |                 |
| ENST00000583981 | AC011379.1-201      |                                                                                | miRNA                   | 9606   | 5:1401957 1  |                 |
| ENST00000598042 | AC011516.2-001      |                                                                                | lincRNA                 | 9606   | 19:226155 2  |                 |
| ENST00000617109 | AC011841.2-201      |                                                                                | miRNA                   | 9606   | GL000205 2   |                 |
| ENST00000454928 | AC013271.3-002      |                                                                                | lincRNA                 | 9606   | 2:1099374 2  |                 |
| ENST00000578597 | AC016727.1-201      |                                                                                | miRNA                   | 9606   | 2:6155536 2  |                 |
| ENST00000437979 | AC016995.3-003      |                                                                                | lincRNA                 | 9606   | 2:3845863 2  |                 |
| ENST00000408375 | AC018628.1-201      |                                                                                | miRNA                   | 9606   | 17:620158 2  |                 |
| ENST00000435682 | AC018742.1-001      |                                                                                | lincRNA                 | 9606   | 2:2168743 3  |                 |
| ENST00000428171 | AC018832.1-001      |                                                                                | lincRNA                 | 9606   | 3:8079322 2  |                 |
| ENST00000619792 | AC023491.2-201      |                                                                                | protein_coding          | 9606   | KI270731. 1  |                 |
| ENST00000440535 | AC024560.3-002      |                                                                                | processed_transcript    | 9606   | 3:1976142 2  |                 |
| ENST00000413954 | AC064871.3-002      |                                                                                | antisense               | 9606   | 2:1830954 2  |                 |
| ENST00000459291 | AC069082.1-201      |                                                                                | miRNA                   | 9606   | 15:791142 2  |                 |
| ENST00000599089 | AC073043.1-006      |                                                                                | lincRNA                 | 9606   | 2:1998784 2  |                 |
| ENST00000600956 | AC073043.1-010      |                                                                                | lincRNA                 | 9606   | 2:1998790 1  |                 |
| ENST00000600062 | AC073043.1-020      |                                                                                | retained_intron         | 9606   | 2:1998945 2  |                 |
| ENST00000382528 | AC074389.6-001      |                                                                                | lincRNA                 | 9606   | 7:1692810 1  |                 |
| ENST00000447529 | AC078842.4-001      |                                                                                | lincRNA                 | 9606   | 7:1373185 1  |                 |
| ENST00000422019 | AC079199.2-001      |                                                                                | processed_pseudogene    | 9606   | 17:398393 2  |                 |
| ENST00000408681 | AC079235.1-201      |                                                                                | miRNA                   | 9606   | 2:2271242 2  |                 |
| ENST00000541917 | AC079354.1-201      | KIAA2012                                                                       | protein_coding          | 9606   | 2:2020732 1  |                 |
| ENST00000615351 | AC079768.1-201      |                                                                                | miRNA                   | 9606   | 4:1699242 1  |                 |
| ENST00000427064 | AC090505.1-001      |                                                                                | lincRNA                 | 9606   | 3:1948278 2  |                 |
| ENST00000578625 | AC090559.1-201      |                                                                                | miRNA                   | 9606   | 11:474858 2  |                 |
| ENST00000402115 | AC091801.1-002      |                                                                                | lincRNA                 | 9606   | 7:3140500 2  |                 |
| ENST00000416748 | AC091813.2-001      |                                                                                | processed_pseudogene    | 9606   | 7:7954391 1  |                 |
| ENST00000425131 | AC092066.6-001      |                                                                                | processed_pseudogene    | 9606   | 19:447651 1  |                 |
| ENST00000408359 | AC092289.1-201      |                                                                                | miRNA                   | 9606   | 16:725795 2  |                 |
| ENST00000598703 | AC092316.1-001      |                                                                                | antisense               | 9606   | 19:854950 3  |                 |
| ENST00000414446 | AC092570.1-001      |                                                                                | processed_pseudogene    | 9606   | 2:1013755 1  |                 |
| ENST00000433998 | AC092580.1-001      |                                                                                | processed_pseudogene    | 9606   | 2:7736438 1  |                 |
| ENST00000497017 | AC093627.11-001     |                                                                                | lincRNA                 | 9606   | 7:174920- 2  |                 |
| ENST00000609486 | AC097467.2-023      |                                                                                | antisense               | 9606   | 4:1553050 4  |                 |
| ENST00000416350 | AC104777.3-001      |                                                                                | lincRNA                 | 9606   | 2:1505661 1  |                 |
| ENST00000424170 | AC104820.2-002      |                                                                                | lincRNA                 | 9606   | 2:1811238 2  |                 |
| ENST00000390165 | AC110056.1-201      |                                                                                | miRNA                   | 9606   | 11:292766 2  |                 |
| ENST00000616561 | AC113133.1-201      |                                                                                | miRNA                   | 9606   | 8:4173481 2  |                 |
| ENST00000509542 | AC114812.9-001      |                                                                                | unprocessed_pseudogene  | 9606   | 2:2337389 2  |                 |
| ENST00000427353 | AC115283.1-001      |                                                                                | processed_pseudogene    | 9606   | 3:3126900 3  |                 |
| ENST00000459309 | AC117401.1-201      |                                                                                | miRNA                   | 9606   | 3:1240619 2  |                 |
| ENST00000583726 | AC122714.1-201      |                                                                                | miRNA                   | 9606   | 5:1805824 2  |                 |
| ENST00000621140 | AC129778.2-001      |                                                                                | lincRNA                 | 9606   | 9:4049785 2  |                 |
| ENST00000625083 | AC139099.7-001      |                                                                                | TEC                     | 9606   | 17:831326 1  |                 |
| ENST00000459300 | AC190387.2-201      |                                                                                | miRNA                   | 9606   | 12:108987 2  |                 |
| ENST00000544651 | ACACB-008           | acetyl-CoA carboxylase beta                                                    | retained_intron         | 9606   | 12:109191 2  |                 |
| ENST00000571220 | ACAP1-007           | ArfGAP with coiled-coil, ankyrin repeat and PH domains 1                       | retained_intron         | 9606   | 17:734293 2  |                 |
| ENST00000528370 | ACAT1-009           | acetyl-CoA acetyltransferase 1                                                 | protein_coding          | 9606   | 11:108133 2  |                 |
| ENST00000532792 | ACAT1-011           | acetyl-CoA acetyltransferase 1                                                 | retained_intron         | 9606   | 11:108138 4  |                 |

|                 |                  |                                                                                         |                              |      |             |
|-----------------|------------------|-----------------------------------------------------------------------------------------|------------------------------|------|-------------|
| ENST00000496890 | ACBD7-002        | acyl-CoA binding domain containing 7                                                    | processed_transcript         | 9606 | 10:150784 2 |
| ENST00000461272 | ACOT8-002        | acyl-CoA thioesterase 8                                                                 | nonsense_mediated_decay      | 9606 | 20:458417 2 |
| ENST00000483689 | ACPP-005         | acid phosphatase, prostate                                                              | retained_intron              | 9606 | 3:1323283 1 |
| ENST00000434099 | ACSL6-005        | acyl-CoA synthetase long-chain family member 6                                          | protein_coding               | 9606 | 5:1319727 2 |
| ENST00000572843 | ACSM2A-009       | acyl-CoA synthetase medium-chain family member 2A                                       | retained_intron              | 9606 | 16:204753 2 |
| ENST00000435871 | ACTBP12-001      | actin, beta pseudogene 12                                                               | transcribed_processed_pseudo | 9606 | 1:9222901 1 |
| ENST00000485601 | ACTL6B-004       | actin-like 6B                                                                           | retained_intron              | 9606 | 7:1006482 2 |
| ENST00000539352 | ACTR3C-201       | ARP3 actin-related protein 3 homolog C (yeast)                                          | protein_coding               | 9606 | 7:1502847 2 |
| ENST00000417441 | ADAM5-002        | ADAM metalloproteinase domain 5, pseudogene                                             | processed_transcript         | 9606 | 8:3931466 2 |
| ENST00000463298 | ADAM8-003        | ADAM metalloproteinase domain 8                                                         | retained_intron              | 9606 | 10:133272 1 |
| ENST00000380566 | ADAMTSL1-002     | ADAMTS-like 1                                                                           | protein_coding               | 9606 | 9:1847416 1 |
| ENST00000474762 | ADARB2-007       | adenosine deaminase, RNA-specific, B2 (non-functional)                                  | processed_transcript         | 9606 | 10:118284 2 |
| ENST00000260600 | ADCY3-001        | adenylate cyclase 3                                                                     | protein_coding               | 9606 | 2:2481916 2 |
| ENST00000506651 | ADH1B-004        | alcohol dehydrogenase 1B (class I), beta polypeptide                                    | nonsense_mediated_decay      | 9606 | 4:9930749 1 |
| ENST00000478927 | ADPRH-003        | ADP-ribosylarginine hydrolase                                                           | protein_coding               | 9606 | 3:1195795 1 |
| ENST00000545670 | AE000661.37-004  |                                                                                         | antisense                    | 9606 | 14:223821 1 |
| ENST00000514473 | AE000661.37-006  |                                                                                         | antisense                    | 9606 | 14:223806 1 |
| ENST00000435732 | AF165138.7-002   |                                                                                         | protein_coding               | 9606 | 21:145919 2 |
| ENST00000483600 | AFF3-011         | AF4/FMR2 family, member 3                                                               | processed_transcript         | 9606 | 2:1001098 4 |
| ENST00000397238 | AGAP3-001        | ArfGAP with GTPase domain, ankyrin repeat and PH domain 3                               | protein_coding               | 9606 | 7:1510867 1 |
| ENST00000375070 | AGER-203         | advanced glycosylation end product-specific receptor                                    | protein_coding               | 9606 | 6:3218096 2 |
| ENST00000355283 | AK9-001          | adenylate kinase 9                                                                      | protein_coding               | 9606 | 6:1095276 1 |
| ENST00000434743 | AKAPBP1-001      | A kinase (PRKA) anchor protein 8 pseudogene 1                                           | processed_pseudogene         | 9606 | 9:1101174 2 |
| ENST00000455190 | AKR1C2-202       | aldo-keto reductase family 1, member C2                                                 | protein_coding               | 9606 | 10:499991 1 |
| ENST00000533295 | AKR1E2-007       | aldo-keto reductase family 1, member E2                                                 | protein_coding               | 9606 | 10:478662 2 |
| ENST00000581611 | AL008721.1-201   |                                                                                         | miRNA                        | 9606 | 22:255327 2 |
| ENST00000579493 | AL020993.1-201   |                                                                                         | miRNA                        | 9606 | 22:382743 2 |
| ENST00000516820 | AL050316.1-201   |                                                                                         | miRNA                        | 9606 | 20:530626 1 |
| ENST00000517228 | AL109947.2-201   |                                                                                         | miRNA                        | 9606 | 6:1095043 1 |
| ENST00000408401 | AL117333.1-201   |                                                                                         | miRNA                        | 9606 | 20:139557 1 |
| ENST00000577299 | AL121655.1-201   |                                                                                         | miRNA                        | 9606 | 2:3208830 2 |
| ENST00000582803 | AL390036.1-201   |                                                                                         | miRNA                        | 9606 | 1:1080186 2 |
| ENST00000408520 | AL591415.1-201   |                                                                                         | miRNA                        | 9606 | 1:4762109 2 |
| ENST00000420153 | AL928742.12-002  |                                                                                         | lincRNA                      | 9606 | 14:105599 2 |
| ENST00000430119 | ALDH1A2-015      | aldehyde dehydrogenase 1 family, member A2                                              | nonsense_mediated_decay      | 9606 | 15:579538 1 |
| ENST00000511283 | ALDH1L1-014      | aldehyde dehydrogenase 1 family, member L1                                              | nonsense_mediated_decay      | 9606 | 3:1261585 2 |
| ENST00000512384 | ALDH1L1-AS1-001  | ALDH1L1 antisense RNA 1                                                                 | antisense                    | 9606 | 3:1261036 2 |
| ENST00000262374 | ALG1-001         | ALG1, chitobiosylidiphosphodolichol beta-mannosyltransferase                            | protein_coding               | 9606 | 16:507181 1 |
| ENST00000591783 | ALG1-010         | ALG1, chitobiosylidiphosphodolichol beta-mannosyltransferase                            | protein_coding               | 9606 | 16:507220 4 |
| ENST00000429370 | ALKBH8-003       | alkB, alkylation repair homolog 8 (E. coli)                                             | protein_coding               | 9606 | 11:107503 2 |
| ENST00000483623 | ALOX5-003        | arachidonate 5-lipoxygenase                                                             | processed_transcript         | 9606 | 10:454240 2 |
| ENST00000509688 | ALPK1-002        | alpha-kinase 1                                                                          | retained_intron              | 9606 | 4:1122973 1 |
| ENST00000374832 | ALPL-002         | alkaline phosphatase, liver/bone/kidney                                                 | protein_coding               | 9606 | 1:2155127 2 |
| ENST00000321420 | AMER3-001        | APC membrane recruitment protein 3                                                      | protein_coding               | 9606 | 2:1307554 1 |
| ENST00000471913 | AMPH-004         | amphiphysin                                                                             | processed_transcript         | 9606 | 7:3839198 1 |
| ENST00000450124 | AMPH-006         | amphiphysin                                                                             | nonsense_mediated_decay      | 9606 | 7:3839198 1 |
| ENST00000491800 | AMT-010          | aminomethyltransferase                                                                  | retained_intron              | 9606 | 3:4941820 2 |
| ENST00000584836 | AMZ2-012         | archaealysin family metalloproteinase 2                                                 | nonsense_mediated_decay      | 9606 | 17:682502 2 |
| ENST00000541652 | ANAPC5-016       | anaphase promoting complex subunit 5                                                    | retained_intron              | 9606 | 12:121335 1 |
| ENST00000522400 | ANGPT1-008       | angiopoietin 1                                                                          | retained_intron              | 9606 | 8:1072845 2 |
| ENST00000514160 | ANK2-017         | ankyrin 2, neuronal                                                                     | retained_intron              | 9606 | 4:1133329 2 |
| ENST00000504887 | ANK2-018         | ankyrin 2, neuronal                                                                     | processed_transcript         | 9606 | 4:1133363 2 |
| ENST00000360839 | ANKHD1-001       | ankyrin repeat and KH domain containing 1                                               | protein_coding               | 9606 | 5:1404018 2 |
| ENST00000504641 | ANKRA2-003       | ankyrin repeat, family A (RFXANK-like), 2                                               | protein_coding               | 9606 | 5:7355490 2 |
| ENST00000622129 | ANKRD20A1-008    | ankyrin repeat domain 20 family, member A1                                              | retained_intron              | 9606 | 9:6788045 1 |
| ENST00000428576 | ANKRD20A11P-003  | ankyrin repeat domain 20 family, member A11, pseudogene                                 | processed_transcript         | 9606 | 21:139379 1 |
| ENST00000498524 | ANKRD28-006      | ankyrin repeat domain 28                                                                | retained_intron              | 9606 | 3:1568374 1 |
| ENST00000519316 | ANKRD46-011      | ankyrin repeat domain 46                                                                | protein_coding               | 9606 | 8:1005225 1 |
| ENST00000529636 | ANO1-009         | anoctamin 1, calcium activated chloride channel                                         | retained_intron              | 9606 | 11:701653 2 |
| ENST00000529913 | ANO1-010         | anoctamin 1, calcium activated chloride channel                                         | retained_intron              | 9606 | 11:701041 2 |
| ENST00000617537 | AOAH-001         | acyloxyacyl hydrolase (neutrophil)                                                      | protein_coding               | 9606 | 7:3651299 1 |
| ENST00000452500 | AP000472.3-001   |                                                                                         | lincRNA                      | 9606 | 21:219333 1 |
| ENST00000438328 | AP000949.1-001   |                                                                                         | processed_pseudogene         | 9606 | 21:228825 3 |
| ENST00000401378 | AP01623.1-201    |                                                                                         | miRNA                        | 9606 | 21:423002 2 |
| ENST00000401135 | AP02884.1-201    |                                                                                         | miRNA                        | 9606 | 11:112247 2 |
| ENST00000590238 | APBA3-005        | amyloid beta (A4) precursor protein-binding, family A, member 3                         | retained_intron              | 9606 | 19:375389 1 |
| ENST00000589298 | APLP1-007        | amyloid beta (A4) precursor-like protein 1                                              | processed_transcript         | 9606 | 19:358745 2 |
| ENST00000613677 | APOBEC3H-202     | apolipoprotein B mRNA editing enzyme, catalytic polypeptide-like 3H                     | protein_coding               | 9606 | 22:390972 1 |
| ENST00000590334 | APOC1-009        | apolipoprotein C-I                                                                      | nonsense_mediated_decay      | 9606 | 19:449148 2 |
| ENST00000551662 | APPL2-004        | adaptor protein, phosphotyrosine interaction, PH domain and leucine zipper containing 2 | protein_coding               | 9606 | 12:105174 1 |
| ENST00000519531 | ARFGAP1-014      | ADP-ribosylation factor GTPase activating protein 1                                     | retained_intron              | 9606 | 20:632728 1 |
| ENST00000549047 | ARFGAP1-021      | ADP-ribosylation factor GTPase activating protein 1                                     | protein_coding               | 9606 | 20:632728 2 |
| ENST00000519273 | ARFGAP1-201      | ADP-ribosylation factor GTPase activating protein 1                                     | protein_coding               | 9606 | 20:632727 2 |
| ENST00000423813 | ARFIP2-010       | ADP-ribosylation factor interacting protein 2                                           | protein_coding               | 9606 | 11:647681 1 |
| ENST00000541078 | ARHGDI-012       | Rho GDP dissociation inhibitor (GDI) alpha                                              | protein_coding               | 9606 | 17:818683 1 |
| ENST00000471928 | ARHGFE19-006     | Rho guanine nucleotide exchange factor (GEF) 19                                         | processed_transcript         | 9606 | 1:1620562 1 |
| ENST00000441785 | ARHGFE19-007     | Rho guanine nucleotide exchange factor (GEF) 19                                         | protein_coding               | 9606 | 1:1620584 1 |
| ENST00000471370 | ARHGFE25-004     | Rho guanine nucleotide exchange factor (GEF) 25                                         | retained_intron              | 9606 | 12:576139 2 |
| ENST00000409978 | ARHGFE33-001     | Rho guanine nucleotide exchange factor (GEF) 33                                         | protein_coding               | 9606 | 2:3888988 1 |
| ENST00000495939 | ARHGFE33-AS1-002 | ARHGFE33 antisense RNA 1                                                                | antisense                    | 9606 | 3:5694007 2 |
| ENST00000555038 | ARHGFE40-004     | Rho guanine nucleotide exchange factor (GEF) 40                                         | protein_coding               | 9606 | 14:210702 1 |
| ENST00000357866 | ARL6IP4-011      | ADP-ribosylation factor-like 6 interacting protein 4                                    | protein_coding               | 9606 | 12:122981 4 |
| ENST00000491358 | ARL8A-002        | ADP-ribosylation factor-like 8A                                                         | processed_transcript         | 9606 | 1:2021343 2 |
| ENST00000481659 | ARMC4-006        | armadillo repeat containing 4                                                           | processed_transcript         | 9606 | 10:278121 2 |
| ENST00000485396 | ARMC8-005        | armadillo repeat containing 8                                                           | protein_coding               | 9606 | 3:1381875 2 |
| ENST00000486832 | ARMC8-011        | armadillo repeat containing 8                                                           | retained_intron              | 9606 | 3:1382380 1 |
| ENST00000463485 | ARMC8-014        | armadillo repeat containing 8                                                           | protein_coding               | 9606 | 3:1381875 2 |
| ENST00000445416 | ARMCX4-004       | armadillo repeat containing, X-linked 4                                                 | nonsense_mediated_decay      | 9606 | X:1014852 1 |
| ENST00000602449 | ARMCX7P-002      | armadillo repeat containing, X-linked 7, pseudogene                                     | processed_transcript         | 9606 | X:1015980 2 |
| ENST00000485273 | ARPC4-009        | actin related protein 2/3 complex, subunit 4, 20kDa                                     | protein_coding               | 9606 | 3:9793096 4 |
| ENST00000419386 | ARRDC1-006       | arrestin domain containing 1                                                            | protein_coding               | 9606 | 9:1376057 1 |
| ENST00000565165 | ARSB-006         | arylsulfatase B                                                                         | protein_coding               | 9606 | 5:7881605 1 |
| ENST00000504873 | ARSK-004         | arylsulfatase family, member K                                                          | nonsense_mediated_decay      | 9606 | 5:9555518 2 |

|                 |                  |                                                                                        |                         |      |             |
|-----------------|------------------|----------------------------------------------------------------------------------------|-------------------------|------|-------------|
| ENST00000459912 | ASB13-006        | ankyrin repeat and SOCS box containing 13                                              | nonsense_mediated_decay | 9606 | 10:563886 2 |
| ENST00000522650 | ASCC3-004        | activating signal cointegrator 1 complex subunit 3                                     | protein_coding          | 9606 | 6:1007151 1 |
| ENST00000551199 | ASIC1-004        | acid-sensing (proton-gated) ion channel 1                                              | retained_intron         | 9606 | 12:500707 2 |
| ENST00000568305 | ASIP-002         | agouti signaling protein                                                               | protein_coding          | 9606 | 20:341945 2 |
| ENST00000467695 | ASS1-009         | argininosuccinate synthase 1                                                           | retained_intron         | 9606 | 9:1304585 2 |
| ENST00000361209 | ASTN2-001        | astrotactin 2                                                                          | protein_coding          | 9606 | 9:1164252 1 |
| ENST00000593235 | ASXL3-013        | additional sex combs like transcriptional regulator 3                                  | nonsense_mediated_decay | 9606 | 18:336056 2 |
| ENST00000330083 | ATAT1-004        | alpha tubulin acetyltransferase 1                                                      | protein_coding          | 9606 | 6:3062688 1 |
| ENST00000601323 | ATCAY-009        | ataxia, cerebellar, Cayman type                                                        | processed_transcript    | 9606 | 19:392528 2 |
| ENST00000426833 | ATF2-201         | activating transcription factor 2                                                      | protein_coding          | 9606 | 2:1750722 2 |
| ENST00000366985 | ATF3-007         | activating transcription factor 3                                                      | protein_coding          | 9606 | 1:2126089 2 |
| ENST00000406122 | ATL2-013         | atlastin GTPase 2                                                                      | protein_coding          | 9606 | 2:3829515 2 |
| ENST00000418678 | ATP11A-003       | ATPase, class VI, type 11A                                                             | protein_coding          | 9606 | 13:112785 2 |
| ENST00000480680 | ATP2B2-008       | ATPase, Ca++ transporting, plasma membrane 2                                           | retained_intron         | 9606 | 3:1038788 1 |
| ENST00000565546 | ATP2C2-007       | ATPase, Ca++ transporting, type 2C, member 2                                           | processed_transcript    | 9606 | 16:844065 2 |
| ENST00000620894 | ATP5A1P10-001    | ATP synthase, H+ transporting, mitochondrial F1 complex, alpha subunit 1 pseudogene 10 | processed_pseudogene    | 9606 | 9:6672458 2 |
| ENST00000505852 | ATP5I-002        | ATP synthase, H+ transporting, mitochondrial Fo complex, subunit E                     | processed_transcript    | 9606 | 4:672438-2  |
| ENST00000449556 | ATP6AP1-010      | ATPase, H+ transporting, lysosomal accessory protein 1                                 | protein_coding          | 9606 | X:1544286 2 |
| ENST00000473485 | ATP6V0B-002      | ATPase, H+ transporting, lysosomal 21kDa, V0 subunit b                                 | retained_intron         | 9606 | 1:4397497 1 |
| ENST00000396774 | ATP6V1H-005      | ATPase, H+ transporting, lysosomal 50/57kDa, V1 subunit H                              | protein_coding          | 9606 | 8:5371573 2 |
| ENST00000546483 | ATXN2-020        | ataxin 2                                                                               | retained_intron         | 9606 | 12:111488 2 |
| ENST00000489774 | AUTS2-006        | autism susceptibility candidate 2                                                      | processed_transcript    | 9606 | 7:7069487 2 |
| ENST00000508229 | AXNDND1-010      | axonemal dynein light chain domain containing 1                                        | protein_coding          | 9606 | 1:1793657 1 |
| ENST00000334100 | AZ12-014         | 5-azacytidine induced 2                                                                | protein_coding          | 9606 | 3:2833168 2 |
| ENST00000483027 | AZIN2-011        | antizyme inhibitor 2                                                                   | processed_transcript    | 9606 | 1:3308116 2 |
| ENST00000497280 | AZIN2-016        | antizyme inhibitor 2                                                                   | processed_transcript    | 9606 | 1:3309324 2 |
| ENST00000535680 | B4GALNT3-002     | beta-1,4-N-acetyl-galactosaminyl transferase 3                                         | retained_intron         | 9606 | 12:460470 2 |
| ENST00000598567 | BABAM1-012       | BRISCA and BRCA1 A complex member 1                                                    | protein_coding          | 9606 | 19:172689 2 |
| ENST00000598382 | BABAM1-017       | BRISCA and BRCA1 A complex member 1                                                    | retained_intron         | 9606 | 19:172764 2 |
| ENST00000453877 | BACH2-007        | BTB and CNC homology 1, basic leucine zipper transcription factor 2                    | protein_coding          | 9606 | 6:9000860 2 |
| ENST00000530134 | BAI2-017         | brain-specific angiogenesis inhibitor 2                                                | processed_transcript    | 9606 | 1:3173951 2 |
| ENST00000393207 | BANP-002         | BTG3 associated nuclear protein                                                        | protein_coding          | 9606 | 16:879700 3 |
| ENST00000573319 | BCAR4-001        | breast cancer anti-estrogen resistance 4 (non-protein coding)                          | lincRNA                 | 9606 | 16:118198 1 |
| ENST00000433098 | BCL2L11-002      | BCL2-like 11 (apoptosis facilitator)                                                   | nonsense_mediated_decay | 9606 | 2:1111226 1 |
| ENST00000378463 | BCOR-008         | BCL6 corepressor                                                                       | protein_coding          | 9606 | X:4004981 1 |
| ENST00000441294 | BCORL1-004       | BCL6 corepressor-like 1                                                                | protein_coding          | 9606 | X:1300144 1 |
| ENST00000446746 | BDH1-008         | 3-hydroxybutyrate dehydrogenase, type 1                                                | protein_coding          | 9606 | 3:1975121 1 |
| ENST00000547208 | BEST3-011        | bestrophin 3                                                                           | nonsense_mediated_decay | 9606 | 12:696433 2 |
| ENST00000486280 | BET1L-004        | Bet1 golgi vesicular membrane trafficking protein-like                                 | protein_coding          | 9606 | 11:205169 1 |
| ENST00000528940 | BIRC3-005        | baculoviral IAP repeat containing 3                                                    | processed_transcript    | 9606 | 11:102317 4 |
| ENST00000527309 | BIRC3-006        | baculoviral IAP repeat containing 3                                                    | protein_coding          | 9606 | 11:102325 2 |
| ENST00000587722 | BLOC1S3-002      | biogenesis of lysosomal organelles complex-1, subunit 3                                | protein_coding          | 9606 | 19:451792 1 |
| ENST00000439052 | BNIP2-006        | BCL2/adenovirus E1B 19kDa interacting protein 2                                        | protein_coding          | 9606 | 15:596633 1 |
| ENST00000603076 | BNIP3P36-001     | BCL2/adenovirus E1B 19kDa interacting protein 3 pseudogene 36                          | processed_pseudogene    | 9606 | 19:229949 1 |
| ENST00000605211 | BPIFA4P-004      | BPI fold containing family A, member 4, pseudogene                                     | retained_intron         | 9606 | 20:331935 1 |
| ENST00000431406 | BRD7P6-001       | bromodomain containing 7 pseudogene 6                                                  | processed_pseudogene    | 9606 | 2:7035301 1 |
| ENST00000449261 | BRPF3-009        | bromodomain and PHD finger containing, 3                                               | nonsense_mediated_decay | 9606 | 6:3619696 2 |
| ENST00000383680 | BTLA-002         | B and T lymphocyte associated                                                          | protein_coding          | 9606 | 3:1124661 1 |
| ENST00000476549 | BTN3A1-002       | butyrophilin, subfamily 3, member A1                                                   | protein_coding          | 9606 | 6:2640223 1 |
| ENST00000370228 | C10orf2-002      | chromosome 10 open reading frame 2                                                     | protein_coding          | 9606 | 10:100988 1 |
| ENST00000470158 | C10orf88-003     | chromosome 10 open reading frame 88                                                    | processed_transcript    | 9606 | 10:122932 2 |
| ENST00000532565 | C11orf80-001     | chromosome 11 open reading frame 80                                                    | protein_coding          | 9606 | 11:667448 2 |
| ENST00000532727 | C11orf80-003     | chromosome 11 open reading frame 80                                                    | nonsense_mediated_decay | 9606 | 11:667590 2 |
| ENST00000623009 | C14orf182-201    | chromosome 14 open reading frame 182                                                   | protein_coding          | 9606 | 14:499923 2 |
| ENST00000321731 | C14orf39-001     | chromosome 14 open reading frame 39                                                    | protein_coding          | 9606 | 14:604359 1 |
| ENST00000557138 | C14orf39-003     | chromosome 14 open reading frame 39                                                    | nonsense_mediated_decay | 9606 | 14:604366 1 |
| ENST00000548920 | C14orf80-007     | chromosome 14 open reading frame 80                                                    | nonsense_mediated_decay | 9606 | 14:105491 2 |
| ENST00000334656 | C14orf80-201     | chromosome 14 open reading frame 80                                                    | protein_coding          | 9606 | 14:105491 2 |
| ENST00000321691 | C17orf47-001     | chromosome 17 open reading frame 47                                                    | protein_coding          | 9606 | 17:585415 1 |
| ENST00000434650 | C17orf62-001     | chromosome 17 open reading frame 62                                                    | protein_coding          | 9606 | 17:824426 2 |
| ENST00000600373 | C19orf48-013     | chromosome 19 open reading frame 48                                                    | protein_coding          | 9606 | 19:507983 2 |
| ENST00000286031 | C1orf112-001     | chromosome 1 open reading frame 112                                                    | protein_coding          | 9606 | 1:1697954 2 |
| ENST00000486384 | C1orf131-008     | chromosome 1 open reading frame 131                                                    | processed_transcript    | 9606 | 1:2312255 2 |
| ENST00000369942 | C1orf194-006     | chromosome 1 open reading frame 194                                                    | retained_intron         | 9606 | 1:1091060 1 |
| ENST00000445071 | C1orf228-017     | chromosome 1 open reading frame 228                                                    | protein_coding          | 9606 | 1:4467472 1 |
| ENST00000493883 | C21orf33-003     | chromosome 21 open reading frame 33                                                    | processed_transcript    | 9606 | 21:441336 1 |
| ENST00000479548 | C21orf62-002     | chromosome 21 open reading frame 62                                                    | protein_coding          | 9606 | 21:327937 2 |
| ENST00000400023 | C22orf34-001     | chromosome 22 open reading frame 34                                                    | lincRNA                 | 9606 | 22:496196 2 |
| ENST00000518401 | C2orf81-004      | chromosome 2 open reading frame 81                                                     | protein_coding          | 9606 | 2:7441601 2 |
| ENST00000478197 | C2orf88-002      | chromosome 2 open reading frame 88                                                     | processed_transcript    | 9606 | 2:1898796 2 |
| ENST00000450357 | C2orf88-007      | chromosome 2 open reading frame 88                                                     | protein_coding          | 9606 | 2:1900895 2 |
| ENST00000599899 | C3-002           | complement component 3                                                                 | retained_intron         | 9606 | 19:667784 2 |
| ENST00000594005 | C3-009           | complement component 3                                                                 | retained_intron         | 9606 | 19:669661 1 |
| ENST00000492792 | C3orf30-005      | chromosome 3 open reading frame 30                                                     | protein_coding          | 9606 | 3:1191469 1 |
| ENST00000545770 | C3orf84-002      | chromosome 3 open reading frame 84                                                     | protein_coding          | 9606 | 3:4917763 1 |
| ENST00000451804 | C4BPB-202        | complement component 4 binding protein, beta                                           | protein_coding          | 9606 | 1:2070068 1 |
| ENST00000503001 | C4orf36-012      | chromosome 4 open reading frame 36                                                     | processed_transcript    | 9606 | 4:8688814 1 |
| ENST00000505296 | C4orf6-004       | chromosome 4 open reading frame 6                                                      | lincRNA                 | 9606 | 4:5525390 2 |
| ENST00000503655 | C5orf34-005      | chromosome 5 open reading frame 34                                                     | nonsense_mediated_decay | 9606 | 5:4349354 2 |
| ENST00000424426 | C6orf141-003     | chromosome 6 open reading frame 141                                                    | processed_transcript    | 9606 | 6:4955102 2 |
| ENST00000624695 | C7orf66-001      | chromosome 7 open reading frame 66                                                     | lincRNA                 | 9606 | 7:1088839 1 |
| ENST00000615071 | C8orf59-011      | chromosome 8 open reading frame 59                                                     | retained_intron         | 9606 | 8:8521450 2 |
| ENST00000526458 | C9orf135-AS1-003 | C9orf135 antisense RNA 1 (head to head)                                                | lincRNA                 | 9606 | 9:6981982 4 |
| ENST00000520996 | CA2-003          | carbonic anhydrase II                                                                  | retained_intron         | 9606 | 8:8546400 2 |
| ENST00000517946 | CAAP1-004        | caspase activity and apoptosis inhibitor 1                                             | processed_transcript    | 9606 | 9:2686992 2 |
| ENST00000445422 | CABIN1-003       | calcineurin binding protein 1                                                          | protein_coding          | 9606 | 22:240114 1 |
| ENST00000542233 | CABP4-007        | calcium binding protein 4                                                              | processed_transcript    | 9606 | 11:674527 2 |
| ENST00000540581 | CACFD1-201       | calcium channel flower domain containing 1                                             | protein_coding          | 9606 | 9:1334599 1 |
| ENST00000544415 | CACNA1C-AS4-001  | CACNA1C antisense RNA 4                                                                | antisense               | 9606 | 12:222053 1 |
| ENST00000612134 | CACNB2-201       | calcium channel, voltage-dependent, beta 2 subunit                                     | protein_coding          | 9606 | 10:183409 1 |
| ENST00000587175 | CACTIN-002       | cactin, spliceosome C complex subunit                                                  | retained_intron         | 9606 | 19:361156 2 |
| ENST00000283269 | CADPS-001        | Ca++-dependent secretion activator                                                     | protein_coding          | 9606 | 3:6239897 2 |
| ENST00000472895 | CAMKV-016        | CaM kinase-like vesicle-associated                                                     | retained_intron         | 9606 | 3:4986095 1 |

|                 |                   |                                                                       |                              |      |           |   |
|-----------------|-------------------|-----------------------------------------------------------------------|------------------------------|------|-----------|---|
| ENST00000357048 | CAPN10-003        | calpain 10                                                            | nonsense_mediated_decay      | 9606 | 2:2405868 | 1 |
| ENST00000586851 | CAPNS1-012        | calpain, small subunit 1                                              | protein_coding               | 9606 | 19:361411 | 4 |
| ENST00000415932 | CASC20-001        | cancer susceptibility candidate 20 (non-protein coding)               | lincRNA                      | 9606 | 20:644672 | 2 |
| ENST00000375890 | CASP9-008         | caspace 9, apoptosis-related cysteine peptidase                       | protein_coding               | 9606 | 1:1549285 | 1 |
| ENST00000490131 | CASR-001          | calcium-sensing receptor                                              | protein_coding               | 9606 | 3:1221836 | 1 |
| ENST00000408532 | CATIP-004         | ciliogenesis associated TTC17 interacting protein                     | retained_intron              | 9606 | 2:2183568 | 2 |
| ENST00000557036 | CATSPERB-002      | catsper channel auxiliary subunit beta                                | nonsense_mediated_decay      | 9606 | 14:915806 | 1 |
| ENST00000346541 | CBFA2T2-201       | core-binding factor, runt domain, alpha subunit 2; translocated to, 2 | protein_coding               | 9606 | 20:335623 | 1 |
| ENST00000490323 | CBWD2-005         | COBW domain containing 2                                              | retained_intron              | 9606 | 2:1134378 | 2 |
| ENST00000467791 | CBWD7-012         | COBW domain containing 7                                              | nonsense_mediated_decay      | 9606 | 9:4114531 | 2 |
| ENST00000424120 | CC2D2A-201        | coiled-coil and C2 domain containing 2A                               | protein_coding               | 9606 | 4:1546986 | 1 |
| ENST00000513730 | CCDC112-006       | coiled-coil domain containing 112                                     | retained_intron              | 9606 | 5:1152753 | 2 |
| ENST00000470137 | CCDC122-002       | coiled-coil domain containing 122                                     | processed_transcript         | 9606 | 13:438239 | 2 |
| ENST00000512432 | CCDC149-008       | coiled-coil domain containing 149                                     | processed_transcript         | 9606 | 4:2483643 | 2 |
| ENST00000434846 | CCDC158-005       | coiled-coil domain containing 158                                     | protein_coding               | 9606 | 4:7637517 | 2 |
| ENST00000239859 | CCDC169-014       | coiled-coil domain containing 169                                     | protein_coding               | 9606 | 13:362311 | 2 |
| ENST00000466180 | CCDC24-008        | coiled-coil domain containing 24                                      | protein_coding               | 9606 | 1:4399184 | 4 |
| ENST00000398814 | CCDC33-001        | coiled-coil domain containing 33                                      | protein_coding               | 9606 | 15:742362 | 1 |
| ENST00000574799 | CCDC40-004        | coiled-coil domain containing 40                                      | retained_intron              | 9606 | 17:800483 | 2 |
| ENST00000529611 | CCDC90B-004       | coiled-coil domain containing 90B                                     | protein_coding               | 9606 | 11:832614 | 2 |
| ENST00000531712 | CCKBR-002         | cholecystokinin B receptor                                            | protein_coding               | 9606 | 11:625992 | 1 |
| ENST00000486428 | CCNC-002          | cyclin C                                                              | protein_coding               | 9606 | 6:9954346 | 1 |
| ENST00000496007 | CCNL2-003         | cyclin L2                                                             | retained_intron              | 9606 | 1:1386499 | 1 |
| ENST00000452312 | CCNYL1-004        | cyclin Y-like 1                                                       | nonsense_mediated_decay      | 9606 | 2:2077121 | 2 |
| ENST00000233836 | CCT4P2-001        | chaperonin containing TCP1, subunit 4 (delta) pseudogene 2            | processed_pseudogene         | 9606 | X:6527091 | 3 |
| ENST00000593867 | CD22-007          | CD22 molecule                                                         | protein_coding               | 9606 | 19:353291 | 3 |
| ENST00000598028 | CD22-018          | CD22 molecule                                                         | processed_transcript         | 9606 | 19:353291 | 1 |
| ENST00000599799 | CD22-023          | CD22 molecule                                                         | retained_intron              | 9606 | 19:353291 | 1 |
| ENST00000392122 | CD247-001         | CD247 molecule                                                        | protein_coding               | 9606 | 1:1674306 | 1 |
| ENST00000368045 | CD48-002          | CD48 molecule                                                         | protein_coding               | 9606 | 1:1606835 | 1 |
| ENST00000488054 | CD96-005          | CD96 molecule                                                         | nonsense_mediated_decay      | 9606 | 3:1115421 | 2 |
| ENST00000442050 | CDC123-002        | cell division cycle 123                                               | protein_coding               | 9606 | 10:121962 | 2 |
| ENST00000478882 | CDC20-003         | cell division cycle 20                                                | processed_transcript         | 9606 | 1:4335976 | 4 |
| ENST00000537909 | CDH22-201         | cadherin 22, type 2                                                   | protein_coding               | 9606 | 20:461737 | 1 |
| ENST00000604175 | CDK20-009         | cyclin-dependent kinase 20                                            | retained_intron              | 9606 | 9:8797044 | 4 |
| ENST00000357886 | CDK5RAP1-011      | CDK5 regulatory subunit associated protein 1                          | protein_coding               | 9606 | 20:333588 | 2 |
| ENST00000471157 | CDKN1C-004        | cyclin-dependent kinase inhibitor 1C (p57, Kip2)                      | retained_intron              | 9606 | 11:288367 | 3 |
| ENST00000531830 | CDON-006          | cell adhesion associated, oncogene regulated                          | nonsense_mediated_decay      | 9606 | 11:126005 | 2 |
| ENST00000404744 | CDPF1-004         | cysteine-rich, DPF motif domain containing 1                          | protein_coding               | 9606 | 22:462440 | 2 |
| ENST00000447168 | CDY11P-001        | chromodomain protein, Y-linked 11 pseudogene                          | unprocessed_pseudogene       | 9606 | Y:2169657 | 1 |
| ENST00000221992 | CEACAM5-001       | carcinoembryonic antigen-related cell adhesion molecule 5             | protein_coding               | 9606 | 19:417086 | 2 |
| ENST00000621209 | CEL-202           | carboxyl ester lipase                                                 | protein_coding               | 9606 | 9:1330619 | 1 |
| ENST00000531165 | CELF1-001         | CUGBP, Elav-like family member 1                                      | protein_coding               | 9606 | 11:474703 | 1 |
| ENST00000475662 | CENPA-003         | centromere protein A                                                  | processed_transcript         | 9606 | 2:2676428 | 2 |
| ENST00000509397 | CENPK-016         | centromere protein K                                                  | protein_coding               | 9606 | 5:6552460 | 2 |
| ENST00000367710 | CENPL-002         | centromere protein L                                                  | protein_coding               | 9606 | 1:1737998 | 2 |
| ENST00000491031 | CENPO-006         | centromere protein O                                                  | retained_intron              | 9606 | 2:2479340 | 1 |
| ENST00000378223 | CEP104-002        | centrosomal protein 104kDa                                            | protein_coding               | 9606 | 1:3843109 | 1 |
| ENST00000560322 | CEP152-002        | centrosomal protein 152kDa                                            | non_stop_decay               | 9606 | 15:487725 | 1 |
| ENST00000520610 | CEP57L1-019       | centrosomal protein 57kDa-like 1                                      | nonsense_mediated_decay      | 9606 | 6:1090955 | 2 |
| ENST00000462419 | CEP70-011         | centrosomal protein 70kDa                                             | protein_coding               | 9606 | 3:1385292 | 2 |
| ENST00000551596 | CEP83-012         | centrosomal protein 83kDa                                             | retained_intron              | 9606 | 12:944029 | 2 |
| ENST00000463535 | CERCAM-006        | cerebral endothelial cell adhesion molecule                           | retained_intron              | 9606 | 9:1284240 | 2 |
| ENST00000565403 | CES1-006          | carboxylesterase 1                                                    | retained_intron              | 9606 | 16:558203 | 2 |
| ENST00000594141 | CFAP221-012       | cilia and flagella associated protein 221                             | protein_coding               | 9606 | 2:1195871 | 1 |
| ENST00000369703 | CFAP58-002        | cilia and flagella associated protein 58                              | protein_coding               | 9606 | 10:104376 | 4 |
| ENST00000424759 | CFL1P7-001        | cofilin 1 (non-muscle) pseudogene 7                                   | processed_pseudogene         | 9606 | 3:2532417 | 3 |
| ENST00000611287 | CH17-3B23.1-201   | Uncharacterized protein {ECO:0000313 Ensembl:ENSP00000476257}         | protein_coding               | 9606 | 1:1208056 | 1 |
| ENST00000621489 | CH17-408M7.1-001  |                                                                       | lincRNA                      | 9606 | 1:1465144 | 2 |
| ENST00000622911 | CH507-254M2.1-005 |                                                                       | lincRNA                      | 9606 | 21:704891 | 1 |
| ENST00000420239 | CHD2-202          | chromodomain helicase DNA binding protein 2                           | protein_coding               | 9606 | 15:929012 | 1 |
| ENST00000564582 | CHD9-009          | chromodomain helicase DNA binding protein 9                           | processed_transcript         | 9606 | 16:530991 | 2 |
| ENST00000554701 | CHEK2P2-001       | checkpoint kinase 2 pseudogene 2                                      | transcribed_unprocessed_pseu | 9606 | 15:202834 | 2 |
| ENST00000534159 | CHRD12-004        | chordin-like 2                                                        | processed_transcript         | 9606 | 11:747009 | 1 |
| ENST00000468573 | CHRM3-004         | cholinergic receptor, muscarinic 3                                    | processed_transcript         | 9606 | 1:2383865 | 2 |
| ENST00000529467 | CHRNA6-002        | cholinergic receptor, nicotinic, alpha 6 (neuronal)                   | retained_intron              | 9606 | 8:4276497 | 2 |
| ENST00000409046 | CHST10-005        | carbohydrate sulfotransferase 10                                      | protein_coding               | 9606 | 2:1003979 | 2 |
| ENST00000591410 | CLASRP-010        | CLK4-associating serine/arginine rich protein                         | nonsense_mediated_decay      | 9606 | 19:450390 | 4 |
| ENST00000455251 | CLCP1-001         | Charcot-Leyden crystal protein pseudogene 1                           | processed_pseudogene         | 9606 | 22:174243 | 1 |
| ENST00000481904 | CLPSL2-003        | colipase-like 2                                                       | processed_transcript         | 9606 | 6:3577659 | 2 |
| ENST00000295911 | CLRN1-003         | clarin 1                                                              | protein_coding               | 9606 | 3:1509261 | 1 |
| ENST00000544584 | CLSTN3-012        | calsyntenin 3                                                         | processed_transcript         | 9606 | 12:713868 | 2 |
| ENST00000574210 | CLUH-002          | clustered mitochondria (cluA/CLU1) homolog                            | retained_intron              | 9606 | 17:269155 | 2 |
| ENST00000519777 | CNGB3-002         | cyclic nucleotide gated channel beta 3                                | processed_transcript         | 9606 | 8:8670394 | 2 |
| ENST00000478120 | CNIH3-003         | cornichon family AMPA receptor auxiliary protein 3                    | processed_transcript         | 9606 | 1:2245291 | 1 |
| ENST00000484374 | CNTLN-003         | centlein, centrosomal protein                                         | processed_transcript         | 9606 | 9:1713498 | 6 |
| ENST00000471618 | CNTNAP4-002       | contactin associated protein-like 4                                   | retained_intron              | 9606 | 16:763098 | 2 |
| ENST00000431571 | CNTRL-005         | centriolin                                                            | protein_coding               | 9606 | 9:1211440 | 2 |
| ENST00000545127 | COA4-005          | cytochrome c oxidase assembly factor 4 homolog (S. cerevisiae)        | protein_coding               | 9606 | 11:738726 | 2 |
| ENST00000395540 | COBL-006          | cordon-bleu WH2 repeat protein                                        | protein_coding               | 9606 | 7:5106439 | 1 |
| ENST00000345356 | COL12A1-002       | collagen, type XII, alpha 1                                           | protein_coding               | 9606 | 6:7508647 | 2 |
| ENST00000419671 | COL12A1-007       | collagen, type XII, alpha 1                                           | protein_coding               | 9606 | 6:7513337 | 2 |
| ENST00000471582 | COL20A1-002       | collagen, type XX, alpha 1                                            | retained_intron              | 9606 | 20:633243 | 1 |
| ENST00000479501 | COL20A1-005       | collagen, type XX, alpha 1                                            | retained_intron              | 9606 | 20:632932 | 1 |
| ENST00000522546 | COL22A1-007       | collagen, type XXII, alpha 1                                          | protein_coding               | 9606 | 8:1387779 | 2 |
| ENST00000512961 | COL25A1-007       | collagen, type XXV, alpha 1                                           | protein_coding               | 9606 | 4:1088136 | 4 |
| ENST00000534234 | COPB1-003         | coatomer protein complex, subunit beta 1                              | protein_coding               | 9606 | 11:144769 | 1 |
| ENST00000421578 | CORO1C-009        | coronin, actin binding protein, 1C                                    | protein_coding               | 9606 | 12:108647 | 1 |
| ENST00000287490 | COX6A2-001        | cytochrome c oxidase subunit VIa polypeptide 2                        | protein_coding               | 9606 | 16:314277 | 1 |
| ENST00000590900 | COX6B2-005        | cytochrome c oxidase subunit VIb polypeptide 2 (testis)               | protein_coding               | 9606 | 19:553504 | 1 |
| ENST00000587854 | COX6B2-008        | cytochrome c oxidase subunit VIb polypeptide 2 (testis)               | retained_intron              | 9606 | 19:553541 | 1 |
| ENST00000603667 | COX6CP16-001      | cytochrome c oxidase subunit VIc pseudogene 16                        | processed_pseudogene         | 9606 | 16:852788 | 2 |
| ENST00000580869 | COX6CP3-001       | cytochrome c oxidase subunit VIc pseudogene 3                         | processed_pseudogene         | 9606 | 18:116769 | 1 |

|                 |                    |                                                                                    |                         |      |             |
|-----------------|--------------------|------------------------------------------------------------------------------------|-------------------------|------|-------------|
| ENST00000597056 | COX6CP7-001        | cytochrome c oxidase subunit VIc pseudogene 7                                      | processed_pseudogene    | 9606 | 19:495024 1 |
| ENST00000505291 | COX7A2P2-001       | cytochrome c oxidase subunit VIIa polypeptide 2 (liver) pseudogene 2               | processed_pseudogene    | 9606 | 4:9690280 2 |
| ENST00000460674 | CP-002             | ceruloplasmin (ferroxidase)                                                        | retained_intron         | 9606 | 3:1491724 4 |
| ENST00000491460 | CPA1-002           | carboxypeptidase A1 (pancreatic)                                                   | retained_intron         | 9606 | 7:1303804 1 |
| ENST00000492072 | CPA4-009           | carboxypeptidase A4                                                                | protein_coding          | 9606 | 7:1302931 4 |
| ENST00000601637 | CPAMD8-006         | C3 and PZP-like, alpha-2-macroglobulin domain containing 8                         | retained_intron         | 9606 | 19:170002 2 |
| ENST00000480404 | CPE-005            | carboxypeptidase E                                                                 | nonsense_mediated_decay | 9606 | 4:1653792 1 |
| ENST00000515025 | CPLX2-005          | complexin 2                                                                        | protein_coding          | 9606 | 5:1758782 1 |
| ENST00000503204 | CPNE4-005          | copine IV                                                                          | processed_transcript    | 9606 | 3:1315347 2 |
| ENST00000559778 | CPNE6-016          | copine VI (neuronal)                                                               | protein_coding          | 9606 | 14:240710 1 |
| ENST00000517742 | CPQ-006            | carboxypeptidase Q                                                                 | protein_coding          | 9606 | 8:9664537 1 |
| ENST00000419704 | CPSF3L-009         | cleavage and polyadenylation specific factor 3-like                                | protein_coding          | 9606 | 1:1311606 4 |
| ENST00000437527 | CPVL-011           | carboxypeptidase, vitellogenic-like                                                | protein_coding          | 9606 | 7:2912104 1 |
| ENST00000459523 | CR383657.1-201     |                                                                                    | miRNA                   | 9606 | 14:184773 2 |
| ENST00000424918 | CR848007.5-001     |                                                                                    | processed_pseudogene    | 9606 | 9:4295928 1 |
| ENST00000480086 | CRB1-007           | crumbs family member 1, photoreceptor morphogenesis associated                     | processed_transcript    | 9606 | 1:1974228 1 |
| ENST00000598894 | CREB3L3-006        | cAMP responsive element binding protein 3-like 3                                   | retained_intron         | 9606 | 19:416444 1 |
| ENST00000489674 | CRELD1-010         | cysteine-rich with EGF-like domains 1                                              | processed_transcript    | 9606 | 3:9941124 2 |
| ENST00000566151 | CRISPLD2-010       | cysteine-rich secretory protein LCCL domain containing 2                           | protein_coding          | 9606 | 16:848199 2 |
| ENST00000566789 | CRISPLD2-012       | cysteine-rich secretory protein LCCL domain containing 2                           | protein_coding          | 9606 | 16:848492 3 |
| ENST00000566165 | CRISPLD2-013       | cysteine-rich secretory protein LCCL domain containing 2                           | nonsense_mediated_decay | 9606 | 16:848892 2 |
| ENST00000525823 | CRYAB-008          | crystallin, alpha B                                                                | protein_coding          | 9606 | 11:111908 1 |
| ENST00000549143 | CS-008             | citrate synthase                                                                   | nonsense_mediated_decay | 9606 | 12:562716 2 |
| ENST00000513609 | CSF1R-006          | colony stimulating factor 1 receptor                                               | retained_intron         | 9606 | 5:1500597 2 |
| ENST00000475259 | CSF2RA-016         | colony stimulating factor 2 receptor, alpha, low-affinity (granulocyte-macrophage) | processed_transcript    | 9606 | X:1290453 2 |
| ENST00000569462 | CSK-016            | c-src tyrosine kinase                                                              | protein_coding          | 9606 | 15:747826 2 |
| ENST00000532460 | CSRP1-004          | cysteine and glycine-rich protein 1                                                | protein_coding          | 9606 | 1:2014839 1 |
| ENST00000533432 | CSRP1-006          | cysteine and glycine-rich protein 1                                                | protein_coding          | 9606 | 1:2014843 1 |
| ENST00000569048 | CTA-481E9.4-001    |                                                                                    | lincRNA                 | 9606 | 16:179331 2 |
| ENST00000314099 | CTAGE9-001         | CTAGE family, member 9                                                             | protein_coding          | 9606 | 6:1317086 1 |
| ENST00000467206 | CTB-49A3.1-001     |                                                                                    | processed_pseudogene    | 9606 | 5:1331722 1 |
| ENST00000526402 | CTBP2P6-001        | C-terminal binding protein 2 pseudogene 6                                          | processed_pseudogene    | 9606 | 11:435220 2 |
| ENST00000611331 | CTC-242N15.1-001   |                                                                                    | lincRNA                 | 9606 | 5:8720540 1 |
| ENST00000603941 | CTC-447K7.1-001    |                                                                                    | processed_pseudogene    | 9606 | 5:1553972 2 |
| ENST00000587645 | CTC-454I21.4-001   |                                                                                    | antisense               | 9606 | 19:371286 2 |
| ENST00000562262 | CTC-457E21.1-001   |                                                                                    | sense_intronic          | 9606 | 19:225209 3 |
| ENST00000607580 | CTC-527H23.4-001   |                                                                                    | lincRNA                 | 9606 | 16:486404 1 |
| ENST00000590626 | CTC-548K16.5-001   |                                                                                    | antisense               | 9606 | 19:144027 2 |
| ENST00000605503 | CTD-2026C7.1-002   |                                                                                    | processed_transcript    | 9606 | 2:5775542 2 |
| ENST00000559211 | CTD-2034I4.1-001   |                                                                                    | lincRNA                 | 9606 | 15:814274 2 |
| ENST00000452067 | CTD-2090I13.2-001  |                                                                                    | processed_pseudogene    | 9606 | 1:2274106 3 |
| ENST00000602740 | CTD-2118P12.1-005  |                                                                                    | lincRNA                 | 9606 | 5:2916442 1 |
| ENST00000503953 | CTD-2154B17.1-001  |                                                                                    | lincRNA                 | 9606 | 5:1077505 1 |
| ENST00000506336 | CTD-2195M15.1-001  |                                                                                    | processed_pseudogene    | 9606 | 5:1274658 2 |
| ENST00000509174 | CTD-2207L17.2-001  | UDP-GlcNAc:betaGal beta-1,3-N-acetylglucosaminyltransferase-like 1 pseudogene 1    | processed_pseudogene    | 9606 | 5:5288966 1 |
| ENST00000606074 | CTD-2228K2.7-004   |                                                                                    | retained_intron         | 9606 | 5:477245- 3 |
| ENST00000603743 | CTD-2269E23.3-001  |                                                                                    | processed_pseudogene    | 9606 | 5:2889778 1 |
| ENST00000556081 | CTD-2298J14.1-001  |                                                                                    | processed_pseudogene    | 9606 | 14:415556 1 |
| ENST00000519677 | CTD-2299I21.1-001  |                                                                                    | processed_pseudogene    | 9606 | 5:7900011 1 |
| ENST00000568646 | CTD-2336H13.1-001  |                                                                                    | processed_pseudogene    | 9606 | 16:768782 1 |
| ENST00000567777 | CTD-2336H13.2-001  |                                                                                    | lincRNA                 | 9606 | 16:767363 1 |
| ENST00000587088 | CTD-2369P2.4-001   |                                                                                    | antisense               | 9606 | 19:102591 2 |
| ENST00000484315 | CTD-2509G16.1-001  |                                                                                    | processed_pseudogene    | 9606 | 14:652688 2 |
| ENST00000586871 | CTD-2527I21.4-002  |                                                                                    | processed_transcript    | 9606 | 19:351388 2 |
| ENST00000601692 | CTD-2527I21.9-001  |                                                                                    | sense_intronic          | 9606 | 19:350363 2 |
| ENST00000523800 | CTD-2544L4.1-001   |                                                                                    | processed_pseudogene    | 9606 | 8:1105554 1 |
| ENST00000569456 | CTD-2547G23.2-001  |                                                                                    | antisense               | 9606 | 16:252383 2 |
| ENST00000450909 | CTD-2574D22.2-001  |                                                                                    | antisense               | 9606 | 16:299268 2 |
| ENST00000567344 | CTD-2576D5.4-001   |                                                                                    | antisense               | 9606 | 16:171345 2 |
| ENST00000448269 | CTD-3105H18.10-001 |                                                                                    | unprocessed_pseudogene  | 9606 | 19:125046 1 |
| ENST00000610398 | CTD-3194G12.2-001  |                                                                                    | lincRNA                 | 9606 | 17:367225 1 |
| ENST00000600135 | CTD-3233P19.7-001  |                                                                                    | unprocessed_pseudogene  | 9606 | 19:212250 4 |
| ENST00000570828 | CTDNBP1-012        | CTD nuclear envelope phosphatase 1                                                 | protein_coding          | 9606 | 17:724359 2 |
| ENST00000540488 | CTNNA2-202         | catenin (cadherin-associated protein), alpha 2                                     | protein_coding          | 9606 | 2:8031337 1 |
| ENST00000373735 | CTNNA3-005         | catenin (cadherin-associated protein), alpha 3                                     | processed_transcript    | 9606 | 10:659201 3 |
| ENST00000534579 | CTNND1-029         | catenin (cadherin-associated protein), delta 1                                     | protein_coding          | 9606 | 11:577618 2 |
| ENST00000606788 | CTSA-023           | cathepsin A                                                                        | nonsense_mediated_decay | 9606 | 20:458901 1 |
| ENST00000534268 | CTSH-011           | cathepsin H                                                                        | processed_transcript    | 9606 | 15:789373 2 |
| ENST00000529612 | CTSH-016           | cathepsin H                                                                        | retained_intron         | 9606 | 15:789276 2 |
| ENST00000534237 | CTSH-017           | cathepsin H                                                                        | processed_transcript    | 9606 | 15:789221 2 |
| ENST00000514851 | CTXN3-003          | cortixin 3                                                                         | processed_transcript    | 9606 | 5:1276530 1 |
| ENST00000564948 | CX3CL1-004         | chemokine (C-X3-C motif) ligand 1                                                  | protein_coding          | 9606 | 16:573725 2 |
| ENST00000395793 | CXCL12-005         | chemokine (C-X-C motif) ligand 12                                                  | protein_coding          | 9606 | 10:443726 1 |
| ENST00000477281 | CXorf36-002        | chromosome X open reading frame 36                                                 | processed_transcript    | 9606 | X:4514990 1 |
| ENST00000370540 | CXorf66-001        | chromosome X open reading frame 66                                                 | protein_coding          | 9606 | X:1399557 1 |
| ENST00000392975 | CYB561-005         | cytochrome b561                                                                    | protein_coding          | 9606 | 17:634323 2 |
| ENST00000533558 | CYB5R2-001         | cytochrome b5 reductase 2                                                          | protein_coding          | 9606 | 11:766510 1 |
| ENST00000541131 | CYFIP2-201         | cytoplasmic FMR1 interacting protein 2                                             | protein_coding          | 9606 | 5:1572661 1 |
| ENST00000374798 | CYL2-001           | cylicin, basic protein of sperm head cytoskeleton 2                                | protein_coding          | 9606 | 9:1029953 4 |
| ENST00000371270 | CYP2C8-001         | cytochrome P450, family 2, subfamily C, polypeptide 8                              | protein_coding          | 9606 | 10:950367 1 |
| ENST00000594920 | CYP2G2P-001        | cytochrome P450, family 2, subfamily G, polypeptide 2 pseudogene                   | unprocessed_pseudogene  | 9606 | 19:410504 1 |
| ENST00000589654 | CYP4F2-007         | cytochrome P450, family 4, subfamily F, polypeptide 2                              | protein_coding          | 9606 | 19:158786 1 |
| ENST00000397485 | CYP4F30P-003       | cytochrome P450, family 4, subfamily F, polypeptide 30, pseudogene                 | processed_transcript    | 9606 | 2:1306801 1 |
| ENST00000450723 | CYP51A1-002        | cytochrome P450, family 51, subfamily A, polypeptide 1                             | protein_coding          | 9606 | 7:9211341 2 |
| ENST00000316161 | CYP8B1-001         | cytochrome P450, family 8, subfamily B, polypeptide 1                              | protein_coding          | 9606 | 3:4287219 2 |
| ENST00000405206 | CYTH4-009          | cytohesin 4                                                                        | protein_coding          | 9606 | 22:372824 1 |
| ENST00000592838 | DAB1-AS1-015       | DAB1 antisense RNA 1                                                               | antisense               | 9606 | 15:86245 2  |
| ENST00000469067 | DAPK1-007          | death-associated protein kinase 1                                                  | retained_intron         | 9606 | 9:8749773 1 |
| ENST00000559897 | DAPK2-006          | death-associated protein kinase 2                                                  | processed_transcript    | 9606 | 15:639392 1 |
| ENST00000514301 | DAPP1-004          | dual adaptor of phosphotyrosine and 3-phosphoinositides                            | retained_intron         | 9606 | 4:9986487 1 |
| ENST00000406071 | DCDC1-201          | doublecortin domain containing 1                                                   | protein_coding          | 9606 | 11:308636 2 |
| ENST00000503182 | DCTD-006           | dCMP deaminase                                                                     | protein_coding          | 9606 | 4:1828914 2 |
| ENST00000409567 | DCTN1-002          | dynactin 1                                                                         | protein_coding          | 9606 | 2:7436149 1 |

|                 |                |                                                                                  |                         |      |             |
|-----------------|----------------|----------------------------------------------------------------------------------|-------------------------|------|-------------|
| ENST00000547345 | DCTN2-013      | dynactin 2 (p50)                                                                 | retained_intron         | 9606 | 12:575349 1 |
| ENST00000542129 | DDX11-005      | DEAD/H (Asp-Glu-Ala-Asp/His) box helicase 11                                     | nonsense_mediated_decay | 9606 | 12:310738 1 |
| ENST00000543026 | DDX11-014      | DEAD/H (Asp-Glu-Ala-Asp/His) box helicase 11                                     | retained_intron         | 9606 | 12:310876 2 |
| ENST00000491308 | DDX39B-019     | DEAD (Asp-Glu-Ala-Asp) box polypeptide 39B                                       | protein_coding          | 9606 | 6:3153130 4 |
| ENST00000463199 | DDX3Y-007      | DEAD (Asp-Glu-Ala-Asp) box helicase 3, Y-linked                                  | processed_transcript    | 9606 | Y:1291300 1 |
| ENST00000610822 | DDX50-201      | DEAD (Asp-Glu-Ala-Asp) box polypeptide 50                                        | protein_coding          | 9606 | 10:689012 2 |
| ENST00000519410 | DECR1-008      | 2,4-dienoyl CoA reductase 1, mitochondrial                                       | protein_coding          | 9606 | 8:9000147 2 |
| ENST00000468102 | DEF6-003       | differentially expressed in FDCP 6 homolog (mouse)                               | processed_transcript    | 9606 | 6:3531760 2 |
| ENST0000049124  | DENND4C-009    | DENN/MADD domain containing 4C                                                   | nonsense_mediated_decay | 9606 | 9:1929075 4 |
| ENST00000477548 | DFFB-003       | DNA fragmentation factor, 40kDa, beta polypeptide (caspase-activated DNase)      | nonsense_mediated_decay | 9606 | 1:3857473 1 |
| ENST00000504396 | DHFR-003       | dihydrofolate reductase                                                          | protein_coding          | 9606 | 5:8062822 1 |
| ENST00000558114 | DHRS1-009      | dehydrogenase/reductase (SDR family) member 1                                    | retained_intron         | 9606 | 14:242987 2 |
| ENST00000559483 | DHRS1-010      | dehydrogenase/reductase (SDR family) member 1                                    | processed_transcript    | 9606 | 14:242922 2 |
| ENST00000461948 | DHRS12-005     | dehydrogenase/reductase (SDR family) member 12                                   | protein_coding          | 9606 | 13:517727 2 |
| ENST00000591220 | DHX58-009      | DEXH (Asp-Glu-X-His) box polypeptide 58                                          | protein_coding          | 9606 | 17:421107 2 |
| ENST00000398557 | DIAPH1-203     | diaphanous-related formin 1                                                      | protein_coding          | 9606 | 5:1415150 1 |
| ENST00000525044 | DIO1-006       | deiodinase, iodothyronine, type I                                                | nonsense_mediated_decay | 9606 | 1:5389418 2 |
| ENST00000466140 | DLG3-007       | discs, large homolog 3 (Drosophila)                                              | processed_transcript    | 9606 | X:7047911 2 |
| ENST00000582054 | DLGAP1-AS4-001 | DLGAP1 antisense RNA 4                                                           | antisense               | 9606 | 18:396235 1 |
| ENST00000555071 | DLST-003       | dihydrolipoamide S-succinyltransferase (E2 component of 2-oxo-glutarate complex) | retained_intron         | 9606 | 14:748819 1 |
| ENST00000470964 | DMKN-060       | dermokine                                                                        | retained_intron         | 9606 | 19:354982 3 |
| ENST00000532817 | DNAAF3-014     | dynein, axonemal, assembly factor 3                                              | protein_coding          | 9606 | 19:551622 1 |
| ENST00000406473 | DNAJA1P4-001   | DnaJ (Hsp40) homolog, subfamily A, member 1 pseudogene 4                         | processed_pseudogene    | 9606 | 6:1143944 1 |
| ENST00000437347 | DNAJA1P6-001   | DnaJ (Hsp40) homolog, subfamily A, member 1 pseudogene 6                         | processed_pseudogene    | 9606 | 22:175186 1 |
| ENST00000476396 | DNAJB4-002     | DnaJ (Hsp40) homolog, subfamily B, member 4                                      | processed_transcript    | 9606 | 1:7800493 1 |
| ENST00000559310 | DNAJC17-006    | DnaJ (Hsp40) homolog, subfamily C, member 17                                     | nonsense_mediated_decay | 9606 | 15:407743 2 |
| ENST00000560065 | DNAJC17-011    | DnaJ (Hsp40) homolog, subfamily C, member 17                                     | nonsense_mediated_decay | 9606 | 15:407742 1 |
| ENST00000402462 | DNAJC5G-002    | DnaJ (Hsp40) homolog, subfamily C, member 5 gamma                                | protein_coding          | 9606 | 2:2727546 4 |
| ENST00000406962 | DNAJC5G-003    | DnaJ (Hsp40) homolog, subfamily C, member 5 gamma                                | protein_coding          | 9606 | 2:2727547 1 |
| ENST00000463694 | DNASE1L3-004   | deoxyribonuclease I-like 3                                                       | retained_intron         | 9606 | 3:5820776 1 |
| ENST00000463988 | DNM1-011       | dynamain 1                                                                       | retained_intron         | 9606 | 9:1282335 1 |
| ENST00000373966 | DNPEP-003      | aspartyl aminopeptidase                                                          | nonsense_mediated_decay | 9606 | 2:2193741 1 |
| ENST00000614472 | DOCK7-202      | dedicator of cytokinesis 7                                                       | protein_coding          | 9606 | 1:6254372 1 |
| ENST00000478380 | DOCK8-011      | dedicator of cytokinesis 8                                                       | retained_intron         | 9606 | 9:273066< 1 |
| ENST00000418517 | DPF1-006       | D4, zinc and double PHD fingers family 1                                         | nonsense_mediated_decay | 9606 | 19:382117 4 |
| ENST00000610283 | DPF3-202       | D4, zinc and double PHD fingers, family 3                                        | protein_coding          | 9606 | 14:726610 1 |
| ENST00000559233 | DPP8-011       | dipeptidyl-peptidase 8                                                           | protein_coding          | 9606 | 15:654467 3 |
| ENST00000463966 | DPPA4-002      | developmental pluripotency associated 4                                          | processed_transcript    | 9606 | 3:1093275 1 |
| ENST00000487299 | DPPA4-008      | developmental pluripotency associated 4                                          | retained_intron         | 9606 | 3:1093290 2 |
| ENST00000605269 | DPRXP2-001     | divergent-paired related homeobox pseudogene 2                                   | processed_pseudogene    | 9606 | 6:3598951 1 |
| ENST00000344624 | DROSHA-201     | drosha, ribonuclease type III                                                    | protein_coding          | 9606 | 5:3140050 2 |
| ENST00000422749 | DSCAM-AS1-002  | DSCAM antisense RNA 1                                                            | antisense               | 9606 | 21:403830 1 |
| ENST00000495344 | DSCR8-004      | Down syndrome critical region gene 8                                             | processed_transcript    | 9606 | 21:381214 2 |
| ENST00000585206 | DSG2-002       | desmoglein 2                                                                     | protein_coding          | 9606 | 18:314982 1 |
| ENST00000456590 | DTX2-011       | deltex 2, E3 ubiquitin ligase                                                    | protein_coding          | 9606 | 7:764169 2  |
| ENST00000549583 | DTX3-005       | deltex 3, E3 ubiquitin ligase                                                    | protein_coding          | 9606 | 12:576046 2 |
| ENST00000593229 | DUS3L-009      | dihydrouridine synthase 3-like (S. cerevisiae)                                   | retained_intron         | 9606 | 19:578755 2 |
| ENST00000601696 | DYRK1B-004     | dual-specificity tyrosine-(Y)-phosphorylation regulated kinase 1B                | retained_intron         | 9606 | 19:398284 4 |
| ENST00000367108 | DYRK3-002      | dual-specificity tyrosine-(Y)-phosphorylation regulated kinase 3                 | protein_coding          | 9606 | 1:2066355 2 |
| ENST00000490477 | EAF2-005       | ELL associated factor 2                                                          | nonsense_mediated_decay | 9606 | 3:1218352 2 |
| ENST00000518323 | EBF1-007       | early B-cell factor 1                                                            | processed_transcript    | 9606 | 5:1586986 3 |
| ENST00000536120 | ECHDC2-201     | enoyl CoA hydratase domain containing 2                                          | protein_coding          | 9606 | 1:5289591 1 |
| ENST00000252440 | ECSIT-004      | ECSIT signalling integrator                                                      | protein_coding          | 9606 | 19:115059 4 |
| ENST00000512363 | EEF1A1P21-001  | eukaryotic translation elongation factor 1 alpha 1 pseudogene 21                 | processed_pseudogene    | 9606 | 4:2974875 2 |
| ENST00000476600 | EFCAB6-007     | EF-hand calcium binding domain 6                                                 | processed_transcript    | 9606 | 22:437653 4 |
| ENST00000618684 | EFCAB8-201     | EF-hand calcium binding domain 8                                                 | protein_coding          | 9606 | 20:328637 1 |
| ENST00000511230 | EGFEM1P-003    | EGF-like and EMI domain containing 1, pseudogene                                 | processed_transcript    | 9606 | 3:1682496 1 |
| ENST00000502332 | EGFEM1P-004    | EGF-like and EMI domain containing 1, pseudogene                                 | processed_transcript    | 9606 | 3:1682495 1 |
| ENST00000405289 | EHPB1-007      | EH domain binding protein 1                                                      | protein_coding          | 9606 | 2:6270719 2 |
| ENST00000421436 | EIF1P1-001     | eukaryotic translation initiation factor 1 pseudogene 1                          | processed_pseudogene    | 9606 | 9:659986 1  |
| ENST00000461493 | EIF2AK1-005    | eukaryotic translation initiation factor 2-alpha kinase 1                        | retained_intron         | 9606 | 7:6049784 2 |
| ENST00000395587 | EIF3C-201      | eukaryotic translation initiation factor 3, subunit C                            | protein_coding          | 9606 | 16:287114 1 |
| ENST00000502290 | ELMOD2-008     | ELMO/CED-12 domain containing 2                                                  | retained_intron         | 9606 | 4:1405424 2 |
| ENST00000590700 | ELOF1-006      | elongation factor 1 homolog (S. cerevisiae)                                      | protein_coding          | 9606 | 19:115535 2 |
| ENST00000505896 | EMB-002        | embigin                                                                          | retained_intron         | 9606 | 5:5039802 1 |
| ENST00000589876 | EML2-008       | echinoderm microtubule associated protein like 2                                 | protein_coding          | 9606 | 19:456069 1 |
| ENST00000394776 | EML3-002       | echinoderm microtubule associated protein like 3                                 | protein_coding          | 9606 | 11:626022 2 |
| ENST00000601198 | EMR1-007       | egf-like module containing, mucin-like, hormone receptor-like 1                  | processed_transcript    | 9606 | 19:689115 2 |
| ENST00000616794 | EMX2-002       | empty spiracles homeobox 2                                                       | protein_coding          | 9606 | 10:117543 1 |
| ENST00000546446 | EMX2-003       | empty spiracles homeobox 2                                                       | processed_transcript    | 9606 | 10:117544 2 |
| ENST00000439162 | ENTPD6-010     | ectonucleoside triphosphate diphosphohydrolase 6 (putative)                      | protein_coding          | 9606 | 20:251957 2 |
| ENST00000373945 | EPB41L1-005    | erythrocyte membrane protein band 4.1-like 1                                     | protein_coding          | 9606 | 20:361547 1 |
| ENST00000451082 | EPB41L1-006    | erythrocyte membrane protein band 4.1-like 1                                     | protein_coding          | 9606 | 20:361907 2 |
| ENST00000342933 | EPB41L3-201    | erythrocyte membrane protein band 4.1-like 3                                     | protein_coding          | 9606 | 18:539238 1 |
| ENST00000444950 | EPHA10-007     | EPH receptor A10                                                                 | retained_intron         | 9606 | 1:3771389 1 |
| ENST00000389672 | EPHA6-002      | EPH receptor A6                                                                  | protein_coding          | 9606 | 3:9681458 1 |
| ENST00000488154 | EPHB1-009      | EPH receptor B1                                                                  | processed_transcript    | 9606 | 3:1347956 4 |
| ENST00000609181 | EPRS-007       | glutamyl-prolyl-tRNA synthetase                                                  | protein_coding          | 9606 | 1:2199872 2 |
| ENST00000540810 | EPS8L1-004     | EPS8-like 1                                                                      | protein_coding          | 9606 | 19:550759 2 |
| ENST00000537828 | EPST11-008     | epithelial stromal interaction 1 (breast)                                        | protein_coding          | 9606 | 13:429263 1 |
| ENST00000551767 | EPYC-002       | epiphycan                                                                        | protein_coding          | 9606 | 12:909718 1 |
| ENST00000380032 | EQTN-001       | equatorin, sperm acrosome associated                                             | protein_coding          | 9606 | 9:2728465 1 |
| ENST00000468118 | ERC2-010       | ELKS/RAB6-interacting/CAST family member 2                                       | processed_transcript    | 9606 | 3:5551090 2 |
| ENST00000587376 | ERCC2-004      | excision repair cross-complementation group 2                                    | nonsense_mediated_decay | 9606 | 19:453532 4 |
| ENST00000404742 | ESR1-004       | estrogen receptor 1                                                              | protein_coding          | 9606 | 6:1516904 4 |
| ENST00000554520 | ESR2-006       | estrogen receptor 2 (ER beta)                                                    | processed_transcript    | 9606 | 14:642330 1 |
| ENST00000444817 | ETNK2-007      | ethanolamine kinase 2                                                            | protein_coding          | 9606 | 1:2041372 4 |
| ENST00000510706 | ETNPPL-001     | ethanolamine-phosphate phospho-lyase                                             | protein_coding          | 9606 | 4:1087424 1 |
| ENST00000509451 | EVC-002        | Ellis van Creveld syndrome                                                       | protein_coding          | 9606 | 4:5711215 1 |
| ENST00000490886 | EXD3-012       | exonuclease 3'-5' domain containing 3                                            | processed_transcript    | 9606 | 9:1373539 2 |
| ENST00000580616 | EXOGP1-001     | endo/exonuclease (5'-3'), endonuclease G-like pseudogene 1                       | processed_pseudogene    | 9606 | 18:211825 2 |
| ENST00000592743 | EZH1-002       | enhancer of zeste 1 polycomb repressive complex 2 subunit                        | protein_coding          | 9606 | 17:427023 1 |
| ENST00000498455 | F10-004        | coagulation factor X                                                             | retained_intron         | 9606 | 13:113140 1 |



|                 |                  |                                                                                   |                              |      |             |
|-----------------|------------------|-----------------------------------------------------------------------------------|------------------------------|------|-------------|
| ENST00000414279 | F13A1-003        | coagulation factor XIII, A1 polypeptide                                           | protein_coding               | 9606 | 6:6266713 2 |
| ENST00000479211 | F13A1-005        | coagulation factor XIII, A1 polypeptide                                           | retained_intron              | 9606 | 6:6250907 2 |
| ENST00000369505 | F8A2-001         | coagulation factor VIII-associated 2                                              | protein_coding               | 9606 | X:1553821 1 |
| ENST00000394090 | F9-201           | coagulation factor IX                                                             | protein_coding               | 9606 | X:1395307 1 |
| ENST00000482018 | FABP3-003        | fatty acid binding protein 3, muscle and heart (mammary-derived growth inhibitor) | protein_coding               | 9606 | 1:3136589 1 |
| ENST00000515543 | FABP5P12-001     | fatty acid binding protein 5 pseudogene 12                                        | processed_pseudogene         | 9606 | 4:1590261 3 |
| ENST00000487898 | FAF1-004         | Fas (TNFRSF6) associated factor 1                                                 | processed_transcript         | 9606 | 1:5070578 4 |
| ENST00000463473 | FAM3-003         | Fas apoptotic inhibitory molecule 3                                               | nonsense_mediated_decay      | 9606 | 1:2069048 1 |
| ENST00000291129 | FAM115D-001      | family with sequence similarity 115, member D (pseudogene)                        | unprocessed_pseudogene       | 9606 | 7:1438007 1 |
| ENST00000500765 | FAM13A-AS1-002   | FAM13A antisense RNA 1                                                            | antisense                    | 9606 | 4:8870978 1 |
| ENST00000503146 | FAM160A1-004     | family with sequence similarity 160, member A1                                    | protein_coding               | 9606 | 4:1514092 2 |
| ENST00000511501 | FAM160A1-005     | family with sequence similarity 160, member A1                                    | processed_transcript         | 9606 | 4:1514093 2 |
| ENST00000442525 | FAM170B-AS1-001  | FAM170B antisense RNA 1                                                           | antisense                    | 9606 | 10:491218 1 |
| ENST00000555064 | FAM174B-007      | family with sequence similarity 174, member B                                     | protein_coding               | 9606 | 15:926190 2 |
| ENST00000410025 | FAM183A-002      | family with sequence similarity 183, member A                                     | nonsense_mediated_decay      | 9606 | 1:4314791 5 |
| ENST00000257515 | FAM189A2-002     | family with sequence similarity 189, member A2                                    | protein_coding               | 9606 | 9:6932932 1 |
| ENST00000551619 | FAM19A2-003      | family with sequence similarity 19 (chemokine (C-C motif)-like), member A2        | protein_coding               | 9606 | 12:617082 2 |
| ENST00000550396 | FAM19A2-007      | family with sequence similarity 19 (chemokine (C-C motif)-like), member A2        | processed_transcript         | 9606 | 12:622587 3 |
| ENST00000547919 | FAM19A2-014      | family with sequence similarity 19 (chemokine (C-C motif)-like), member A2        | processed_transcript         | 9606 | 12:622068 1 |
| ENST00000464043 | FAM213B-009      | family with sequence similarity 213, member B                                     | processed_transcript         | 9606 | 1:2586817 2 |
| ENST00000369641 | FAM3A-012        | family with sequence similarity 3, member A                                       | protein_coding               | 9606 | X:1545065 1 |
| ENST0000051269  | FAM57B-009       | family with sequence similarity 57, member B                                      | protein_coding               | 9606 | 16:300354 5 |
| ENST00000435741 | FAM58CP-001      | family with sequence similarity 58, member C, pseudogene                          | processed_pseudogene         | 9606 | Y:2662652 1 |
| ENST00000566559 | FAM65A-005       | family with sequence similarity 65, member A                                      | protein_coding               | 9606 | 16:675380 2 |
| ENST00000566522 | FAM65A-010       | family with sequence similarity 65, member A                                      | processed_transcript         | 9606 | 16:675288 2 |
| ENST00000477515 | FAM71F2-005      | family with sequence similarity 71, member F2                                     | protein_coding               | 9606 | 7:1286722 2 |
| ENST00000345041 | FAM83G-201       | family with sequence similarity 83, member G                                      | protein_coding               | 9606 | 17:189710 1 |
| ENST00000474949 | FANCC-005        | Fanconi anemia, complementation group C                                           | processed_transcript         | 9606 | 9:9517111 1 |
| ENST00000431771 | FBLIM1-007       | filamin binding LIM protein 1                                                     | protein_coding               | 9606 | 1:1575879 1 |
| ENST00000460538 | FBLN1-013        | fibulin 1                                                                         | retained_intron              | 9606 | 22:455328 1 |
| ENST00000465578 | FBLN1-014        | fibulin 1                                                                         | retained_intron              | 9606 | 22:455331 1 |
| ENST00000440407 | FBXL15-006       | F-box and leucine-rich repeat protein 15                                          | protein_coding               | 9606 | 10:102420 2 |
| ENST00000224862 | FBXL15-201       | F-box and leucine-rich repeat protein 15                                          | protein_coding               | 9606 | 10:102419 1 |
| ENST00000471231 | FBXL19-004       | F-box and leucine-rich repeat protein 19                                          | protein_coding               | 9606 | 16:309230 1 |
| ENST00000467490 | FBXL21-004       | F-box and leucine-rich repeat protein 21 (gene/pseudogene)                        | processed_transcript         | 9606 | 5:1359304 1 |
| ENST00000478089 | FBXO42-002       | F-box protein 42                                                                  | processed_transcript         | 9606 | 1:1629231 1 |
| ENST00000251546 | FBXO44-002       | F-box protein 44                                                                  | protein_coding               | 9606 | 1:1165437 1 |
| ENST00000513696 | FBXO8-004        | F-box protein 8                                                                   | protein_coding               | 9606 | 4:1742411 2 |
| ENST00000604872 | FBXW7-004        | F-box and WD repeat domain containing 7, E3 ubiquitin protein ligase              | protein_coding               | 9606 | 4:1524111 1 |
| ENST00000496394 | FCF1P3-001       | FCF1 pseudogene 3                                                                 | processed_pseudogene         | 9606 | 3:1068486 1 |
| ENST00000367972 | FCGR2A-002       | Fc fragment of IgG, low affinity IIa, receptor (CD32)                             | protein_coding               | 9606 | 1:1615054 1 |
| ENST00000349527 | FCRLA-007        | Fc receptor-like A                                                                | protein_coding               | 9606 | 1:1617072 2 |
| ENST00000425091 | FDPSP6-001       | farnesyl diphosphate synthase pseudogene 6                                        | processed_pseudogene         | 9606 | 21:203883 2 |
| ENST00000440443 | FER1L4-003       | fer-1-like family member 4, pseudogene (functional)                               | processed_transcript         | 9606 | 20:355761 2 |
| ENST00000412452 | FER1L4-012       | fer-1-like family member 4, pseudogene (functional)                               | retained_intron              | 9606 | 20:355997 2 |
| ENST00000395631 | FERMT2-002       | fermitin family member 2                                                          | protein_coding               | 9606 | 14:528572 2 |
| ENST00000343279 | FERMT2-201       | fermitin family member 2                                                          | protein_coding               | 9606 | 14:528572 2 |
| ENST00000551984 | FGD4-014         | FYVE, RhoGEF and PH domain containing 4                                           | nonsense_mediated_decay      | 9606 | 12:325021 2 |
| ENST00000610990 | FGF1-201         | fibroblast growth factor 1 (acidic)                                               | protein_coding               | 9606 | 5:1425921 3 |
| ENST00000607251 | FGF14-IT1-003    | FGF14 intronic transcript 1 (non-protein coding)                                  | sense_intronic               | 9606 | 13:102292 1 |
| ENST00000619564 | FGFR1-204        | fibroblast growth factor receptor 1                                               | protein_coding               | 9606 | 8:3841953 1 |
| ENST00000491111 | FGFR2-013        | fibroblast growth factor receptor 2                                               | processed_transcript         | 9606 | 10:121583 2 |
| ENST00000507708 | FGFR4-011        | fibroblast growth factor receptor 4                                               | processed_transcript         | 9606 | 5:1770869 2 |
| ENST00000508139 | FGFR4-013        | fibroblast growth factor receptor 4                                               | retained_intron              | 9606 | 5:1770917 2 |
| ENST00000430447 | FGGY-004         | FGGY carbohydrate kinase domain containing                                        | nonsense_mediated_decay      | 9606 | 1:5929701 1 |
| ENST00000459961 | FHAD1-009        | forkhead-associated (FHA) phosphopeptide binding domain 1                         | retained_intron              | 9606 | 1:1532446 2 |
| ENST00000533045 | FIBP-007         | fibroblast growth factor (acidic) intracellular binding protein                   | protein_coding               | 9606 | 11:658839 1 |
| ENST00000620828 | FMR1-013         | fragile X mental retardation 1                                                    | retained_intron              | 9606 | X:1479276 2 |
| ENST00000370471 | FMR1-202         | fragile X mental retardation 1                                                    | protein_coding               | 9606 | X:1479119 1 |
| ENST00000613724 | FMR1-AS1_2.1-201 | FMR1 antisense RNA 1 conserved region 2                                           | misc_RNA                     | 9606 | X:1479118 2 |
| ENST00000480856 | FNDC1-003        | fibronectin type III domain containing 1                                          | processed_transcript         | 9606 | 6:1592182 1 |
| ENST00000555242 | FOS-008          | FBJ murine osteosarcoma viral oncogene homolog                                    | protein_coding               | 9606 | 14:752789 2 |
| ENST00000361953 | FOXM1-001        | forkhead box M1                                                                   | protein_coding               | 9606 | 12:285768 2 |
| ENST00000423577 | FPGS-001         | folylpolyglutamate synthase                                                       | protein_coding               | 9606 | 9:1278033 4 |
| ENST00000479147 | FPGS-015         | folylpolyglutamate synthase                                                       | processed_transcript         | 9606 | 9:1277945 2 |
| ENST00000443452 | FUNDC2P2-002     | FUN14 domain containing 2 pseudogene 2                                            | transcribed_processed_pseudo | 9606 | 2:8429077 2 |
| ENST00000618099 | FURIN-202        | furin (paired basic amino acid cleaving enzyme)                                   | protein_coding               | 9606 | 15:908728 1 |
| ENST00000592563 | FUT6-011         | fucosyltransferase 6 (alpha (1,3) fucosyltransferase)                             | protein_coding               | 9606 | 19:583137 1 |
| ENST00000604504 | FXYD3-006        | FXYD domain containing ion transport regulator 3                                  | retained_intron              | 9606 | 19:351163 3 |
| ENST00000342879 | FXYD5-001        | FXYD domain containing ion transport regulator 5                                  | protein_coding               | 9606 | 19:351547 1 |
| ENST00000484067 | FYN-018          | FYN proto-oncogene, Src family tyrosine kinase                                    | protein_coding               | 9606 | 6:1117143 1 |
| ENST00000517911 | FZD3-003         | frizzled class receptor 3                                                         | processed_transcript         | 9606 | 8:2856306 2 |
| ENST00000395095 | FZR1-002         | fizzy/cell division cycle 20 related 1 (Drosophila)                               | protein_coding               | 9606 | 19:352299 2 |
| ENST00000570803 | GAA-005          | glucosidase, alpha; acid                                                          | protein_coding               | 9606 | 17:801015 2 |
| ENST00000557449 | GABRA5-006       | gamma-aminobutyric acid (GABA) A receptor, alpha 5                                | processed_transcript         | 9606 | 15:268672 2 |
| ENST00000274545 | GABRA6-001       | gamma-aminobutyric acid (GABA) A receptor, alpha 6                                | protein_coding               | 9606 | 5:1616855 1 |
| ENST00000557765 | GABRB3-014       | gamma-aminobutyric acid (GABA) A receptor, beta 3                                 | retained_intron              | 9606 | 15:265611 2 |
| ENST00000295452 | GABRG1-001       | gamma-aminobutyric acid (GABA) A receptor, gamma 1                                | protein_coding               | 9606 | 4:4603576 1 |
| ENST00000445006 | GAD1-008         | glutamate decarboxylase 1 (brain, 67kDa)                                          | protein_coding               | 9606 | 2:1708161 3 |
| ENST00000456864 | GAD1-010         | glutamate decarboxylase 1 (brain, 67kDa)                                          | protein_coding               | 9606 | 2:1708177 1 |
| ENST00000428682 | GAL3ST1-009      | galactose-3-O-sulfotransferase 1                                                  | protein_coding               | 9606 | 22:300559 2 |
| ENST00000393569 | GALC-002         | galactosylceramidase                                                              | protein_coding               | 9606 | 14:879343 1 |
| ENST00000393568 | GALC-005         | galactosylceramidase                                                              | protein_coding               | 9606 | 14:879346 2 |
| ENST00000472111 | GALT-009         | galactose-1-phosphate uridylyltransferase                                         | retained_intron              | 9606 | 9:3464666 2 |
| ENST00000436626 | GAPDHP48-001     | glyceraldehyde 3 phosphate dehydrogenase pseudogene 48                            | processed_pseudogene         | 9606 | 2:3688021 2 |
| ENST00000433910 | GAPDHP75-001     | glyceraldehyde-3-phosphate dehydrogenase pseudogene 75                            | processed_pseudogene         | 9606 | 1:1891323 4 |
| ENST00000469528 | GAPVD1-018       | GTPase activating protein and VPS9 domains 1                                      | processed_transcript         | 9606 | 9:1252618 2 |
| ENST00000464616 | GARNL3-015       | GTPase activating Rap/RanGAP domain-like 3                                        | processed_transcript         | 9606 | 9:1272850 2 |
| ENST00000478124 | GARS-002         | glycyl-tRNA synthetase                                                            | retained_intron              | 9606 | 7:3059488 1 |
| ENST00000542249 | GAS7-010         | growth arrest-specific 7                                                          | protein_coding               | 9606 | 17:991683 1 |
| ENST00000414723 | GCA-010          | grancalcin, EF-hand calcium binding protein                                       | protein_coding               | 9606 | 2:1623564 1 |
| ENST00000409866 | GCC2-003         | GRIP and coiled-coil domain containing 2                                          | protein_coding               | 9606 | 2:1084498 1 |
| ENST00000497568 | GCG-003          | glucagon                                                                          | retained_intron              | 9606 | 2:1621446 2 |

|                 |                  |                                                                                                |                                |      |             |
|-----------------|------------------|------------------------------------------------------------------------------------------------|--------------------------------|------|-------------|
| ENST00000376986 | GDA-002          | guanine deaminase                                                                              | protein_coding                 | 9606 | 9:7214945 1 |
| ENST00000445417 | GEMIN8P3-001     | gem (nuclear organelle) associated protein 8 pseudogene 3                                      | processed_pseudogene           | 9606 | X:8630436 1 |
| ENST00000518906 | GFPT2-005        | glutamine-fructose-6-phosphate transaminase 2                                                  | protein_coding                 | 9606 | 5:1803188 1 |
| ENST00000566685 | GGA2-016         | golgi-associated, gamma adaptin ear containing, ARF binding protein 2                          | processed_transcript           | 9606 | 16:234666 2 |
| ENST00000573591 | GGT6-004         | gamma-glutamyltransferase 6                                                                    | protein_coding                 | 9606 | 17:455782 1 |
| ENST00000618759 | GIMAP6-201       | GTPase, IMAP family member 6                                                                   | protein_coding                 | 9606 | 7:1506253 1 |
| ENST00000486459 | GK5-013          | glycerol kinase 5 (putative)                                                                   | protein_coding                 | 9606 | 3:1421701 2 |
| ENST00000481498 | GKN2-003         | gastrokine 2                                                                                   | protein_coding                 | 9606 | 2:6894529 1 |
| ENST00000532985 | GLB1L3-008       | galactosidase, beta 1-like 3                                                                   | retained_intron                | 9606 | 11:134287 2 |
| ENST00000477960 | GLDC-003         | glycine dehydrogenase (decarboxylating)                                                        | processed_transcript           | 9606 | 9:6532899 2 |
| ENST00000559317 | GLDN-009         | gliomedin                                                                                      | retained_intron                | 9606 | 15:513602 2 |
| ENST00000490709 | GLIS3-001        | GLIS family zinc finger 3                                                                      | processed_transcript           | 9606 | 9:4118530 2 |
| ENST00000546851 | GLT8D2-004       | glycosyltransferase 8 domain containing 2                                                      | protein_coding                 | 9606 | 12:103999 2 |
| ENST00000595582 | GLTSCR2-007      | glioma tumor suppressor candidate region gene 2                                                | processed_transcript           | 9606 | 19:477458 2 |
| ENST00000319701 | GM140-001        | uncharacterized LOC100287948                                                                   | lincRNA                        | 9606 | 1:1812363 1 |
| ENST00000534441 | GMDS-AS1-010     | GMDS antisense RNA 1 (head to head)                                                            | lincRNA                        | 9606 | 6:2245842 2 |
| ENST00000220940 | GML-001          | glycosylphosphatidylinositol anchored molecule like                                            | protein_coding                 | 9606 | 8:1428348 2 |
| ENST00000492538 | GNAZ-003         | guanine nucleotide binding protein (G protein), alpha z polypeptide                            | processed_transcript           | 9606 | 22:230705 2 |
| ENST00000503610 | GOLPH3-004       | golgi phosphoprotein 3 (coat-protein)                                                          | nonsense_mediated_decay        | 9606 | 5:3212636 2 |
| ENST00000620426 | GON4L-203        | gon-4-like (C. elegans)                                                                        | protein_coding                 | 9606 | 1:1557503 3 |
| ENST00000471559 | GORASP2-004      | golgi reassembly stacking protein 2, 55kDa                                                     | processed_transcript           | 9606 | 2:1709284 1 |
| ENST00000471757 | GPAT2-002        | glycerol-3-phosphate acyltransferase 2, mitochondrial                                          | retained_intron                | 9606 | 2:9602203 2 |
| ENST00000468080 | GPM6B-011        | glycoprotein M6B                                                                               | protein_coding                 | 9606 | X:1377990 2 |
| ENST00000487890 | GNPMB-006        | glycoprotein (TSMembrane) nmb                                                                  | processed_transcript           | 9606 | 7:2324676 2 |
| ENST00000507065 | GPR111-003       | G protein-coupled receptor 111                                                                 | protein_coding                 | 9606 | 6:4765643 1 |
| ENST00000502482 | GPR125-014       | G protein-coupled receptor 125                                                                 | protein_coding                 | 9606 | 4:2242003 1 |
| ENST00000543826 | GPR133-009       | G protein-coupled receptor 133                                                                 | processed_transcript           | 9606 | 12:130953 2 |
| ENST00000482813 | GPR160-006       | G protein-coupled receptor 160                                                                 | processed_transcript           | 9606 | 3:1700381 2 |
| ENST00000624973 | GPR1-AS-002      | GPR1 antisense RNA                                                                             | retained_intron                | 9606 | 2:2062594 2 |
| ENST00000534502 | GPR89A-006       | G protein-coupled receptor 89A                                                                 | protein_coding                 | 9606 | 1:1456080 1 |
| ENST00000589115 | GPX4-007         | glutathione peroxidase 4                                                                       | protein_coding                 | 9606 | 19:110400 1 |
| ENST00000562288 | GRAMD2-006       | GRAM domain containing 2                                                                       | nonsense_mediated_decay        | 9606 | 15:721678 2 |
| ENST00000564773 | GRAMD2-011       | GRAM domain containing 2                                                                       | retained_intron                | 9606 | 15:721619 2 |
| ENST00000567029 | GRAMD2-012       | GRAM domain containing 2                                                                       | retained_intron                | 9606 | 15:721618 1 |
| ENST00000578961 | GRB2-008         | growth factor receptor-bound protein 2                                                         | protein_coding                 | 9606 | 17:753203 2 |
| ENST00000473071 | GRB7-007         | growth factor receptor-bound protein 7                                                         | retained_intron                | 9606 | 17:397432 2 |
| ENST00000584853 | GRB7-010         | growth factor receptor-bound protein 7                                                         | processed_transcript           | 9606 | 17:397379 4 |
| ENST00000461318 | GRHL3-004        | grainyhead-like 3 (Drosophila)                                                                 | retained_intron                | 9606 | 1:2434216 2 |
| ENST00000602210 | GRIK5-006        | glutamate receptor, ionotropic, kainate 5                                                      | retained_intron                | 9606 | 19:419992 2 |
| ENST00000619107 | GRIPAP1-010      | GRIP1 associated protein 1                                                                     | protein_coding                 | 9606 | X:4897625 2 |
| ENST00000445675 | GRM7-AS3-001     | GRM7 antisense RNA 3                                                                           | lincRNA                        | 9606 | 3:6631900 1 |
| ENST00000588170 | GRN-012          | granulin                                                                                       | retained_intron                | 9606 | 17:443452 1 |
| ENST00000414377 | GS1-115G20.1-001 |                                                                                                | sense_intronic                 | 9606 | 1:1844083 1 |
| ENST00000422795 | GS1-542M4.3-001  |                                                                                                | processed_pseudogene           | 9606 | X:8856665 2 |
| ENST00000464556 | GSDMB-006        | gasdermin B                                                                                    | retained_intron                | 9606 | 17:399094 2 |
| ENST00000520542 | GSDMB-010        | gasdermin B                                                                                    | protein_coding                 | 9606 | 17:399045 2 |
| ENST00000521365 | GSDMC-003        | gasdermin C                                                                                    | retained_intron                | 9606 | 8:1297517 2 |
| ENST00000438425 | GSTA7P-001       | glutathione S-transferase alpha 7, pseudogene                                                  | unprocessed_pseudogene         | 9606 | 6:5273959 1 |
| ENST00000622534 | GTF3C2-202       | general transcription factor IIIC, polypeptide 2, beta 110kDa                                  | protein_coding                 | 9606 | 2:2733360 2 |
| ENST00000470386 | GTF3C3-011       | general transcription factor IIIC, polypeptide 3, 102kDa                                       | processed_transcript           | 9606 | 2:1967854 4 |
| ENST00000483839 | GTPBP4-005       | GTP binding protein 4                                                                          | processed_transcript           | 9606 | 10:101240 4 |
| ENST00000492832 | GUSBP2-001       | glucuronidase, beta pseudogene 2                                                               | transcribed_unprocessed_pseudo | 9606 | 6:2687857 2 |
| ENST00000446960 | H2AFZP5-001      | H2A histone family, member Z pseudogene 5                                                      | processed_pseudogene           | 9606 | 10:779534 1 |
| ENST00000514445 | HACL1-002        | 2-hydroxyacyl-CoA lyase 1                                                                      | protein_coding                 | 9606 | 3:1556074 2 |
| ENST00000507260 | HADH-009         | hydroxyacyl-CoA dehydrogenase                                                                  | retained_intron                | 9606 | 4:1080144 2 |
| ENST00000502896 | HAND2-AS1-008    | HAND2 antisense RNA 1 (head to head)                                                           | antisense                      | 9606 | 4:1735304 1 |
| ENST00000616485 | HAND2-AS1-201    | HAND2 antisense RNA 1 (head to head)                                                           | antisense                      | 9606 | 4:1735304 1 |
| ENST00000562889 | HAPLN3-003       | hyaluronan and proteoglycan link protein 3                                                     | protein_coding                 | 9606 | 15:888778 2 |
| ENST00000428854 | HAUS5-002        | HAUS augmin-like complex, subunit 5                                                            | retained_intron                | 9606 | 19:356128 2 |
| ENST00000485846 | HBP1-003         | HMG-box transcription factor 1                                                                 | protein_coding                 | 9606 | 7:1071697 4 |
| ENST00000448756 | HCG19P-001       | HLA complex group 19 pseudogene                                                                | processed_pseudogene           | 9606 | 6:3035927 1 |
| ENST00000424675 | HCG27-002        | HLA complex group 27 (non-protein coding)                                                      | protein_coding                 | 9606 | 6:3119813 2 |
| ENST00000425430 | HDAC11-006       | histone deacetylase 11                                                                         | nonsense_mediated_decay        | 9606 | 3:1348030 3 |
| ENST00000459727 | HDAC3-012        | histone deacetylase 3                                                                          | processed_transcript           | 9606 | 5:1416214 4 |
| ENST00000535493 | HDAC4-016        | histone deacetylase 4                                                                          | retained_intron                | 9606 | 2:2390948 1 |
| ENST00000482651 | HDGF-006         | hepatoma-derived growth factor                                                                 | processed_transcript           | 9606 | 1:1567431 2 |
| ENST00000588183 | HDHD2-001        | haloacid dehalogenase-like hydrolase domain containing 2                                       | nonsense_mediated_decay        | 9606 | 18:471074 2 |
| ENST00000370082 | HELZ2-004        | helicase with zinc finger 2, transcriptional coactivator                                       | retained_intron                | 9606 | 20:635701 2 |
| ENST00000519389 | HEPH-001         | hephaestin                                                                                     | protein_coding                 | 9606 | X:6616254 2 |
| ENST00000440441 | HERC2P3-011      | hect domain and RLD 2 pseudogene 3                                                             | processed_transcript           | 9606 | 15:204442 2 |
| ENST00000277817 | HERC4-002        | HECT and RLD domain containing E3 ubiquitin protein ligase 4                                   | protein_coding                 | 9606 | 10:679218 1 |
| ENST00000427635 | HERC4-010        | HECT and RLD domain containing E3 ubiquitin protein ligase 4                                   | nonsense_mediated_decay        | 9606 | 10:679224 1 |
| ENST00000569569 | HERPUD1-005      | homocysteine-inducible, endoplasmic reticulum stress-inducible, ubiquitin-like domain member 1 | retained_intron                | 9606 | 16:569321 2 |
| ENST00000357836 | HFE2-002         | hemochromatosis type 2 (juvenile)                                                              | protein_coding                 | 9606 | 1:1460174 1 |
| ENST00000521576 | HGSNAT-003       | heparan-alpha-glucosaminide N-acetyltransferase                                                | protein_coding                 | 9606 | 8:4318028 1 |
| ENST00000545781 | HHAT-205         | hedgehog acyltransferase                                                                       | protein_coding                 | 9606 | 1:2103697 1 |
| ENST00000392332 | HIBCH-010        | 3-hydroxyisobutyryl-CoA hydrolase                                                              | protein_coding                 | 9606 | 2:1902039 1 |
| ENST00000427832 | HIGD1AP12-001    | HIG1 hypoxia inducible domain family, member 1A pseudogene 12                                  | processed_pseudogene           | 9606 | 1:1113802 2 |
| ENST00000532312 | HINFP-008        | histone H4 transcription factor                                                                | protein_coding                 | 9606 | 11:119123 1 |
| ENST00000474908 | HINT2-003        | histidine triad nucleotide binding protein 2                                                   | processed_transcript           | 9606 | 9:3581296 2 |
| ENST00000448609 | HIST1H2APS6-001  | HIST1H2A pseudogene 6                                                                          | processed_pseudogene           | 9606 | 13:364900 1 |
| ENST00000488706 | HKDC1-003        | hexokinase domain containing 1                                                                 | processed_transcript           | 9606 | 10:692475 2 |
| ENST00000519047 | HMBX1-005        | homeobox containing 1                                                                          | protein_coding                 | 9606 | 8:2889062 2 |
| ENST00000406019 | HMBG1P13-001     | high mobility group box 1 pseudogene 13                                                        | processed_pseudogene           | 9606 | 6:1328682 2 |
| ENST00000520062 | HMBG1P46-001     | high mobility group box 1 pseudogene 46                                                        | processed_pseudogene           | 9606 | 8:1071732 2 |
| ENST00000417997 | HMBG3P20-001     | high mobility group box 3 pseudogene 20                                                        | processed_pseudogene           | 9606 | 7:2698276 1 |
| ENST00000428894 | HMBG3P5-001      | high mobility group box 3 pseudogene 5                                                         | processed_pseudogene           | 9606 | 10:110450 1 |
| ENST00000463817 | HMGN2-006        | high mobility group nucleosomal binding domain 2                                               | processed_transcript           | 9606 | 1:2647251 1 |
| ENST00000433603 | HMGN2P3-001      | high mobility group nucleosomal binding domain 2 pseudogene 3                                  | processed_pseudogene           | 9606 | 16:260325 1 |
| ENST00000426409 | HNRNPA1P29-001   | heterogeneous nuclear ribonucleoprotein A1 pseudogene 29                                       | processed_pseudogene           | 9606 | 13:933949 1 |
| ENST00000446472 | HNRNPA1P73-001   | heterogeneous nuclear ribonucleoprotein A1 pseudogene 73                                       | processed_pseudogene           | 9606 | 7:2732860 4 |
| ENST00000313899 | HNRNPD-001       | heterogeneous nuclear ribonucleoprotein D (AU-rich element RNA binding protein 1, 37kDa)       | protein_coding                 | 9606 | 4:8235249 1 |
| ENST00000534639 | HNRNPKP3-001     | heterogeneous nuclear ribonucleoprotein K pseudogene 3                                         | transcribed_unprocessed_pseudo | 9606 | 11:432621 4 |

|                 |                   |                                                                                |                         |      |           |   |
|-----------------|-------------------|--------------------------------------------------------------------------------|-------------------------|------|-----------|---|
| ENST00000489695 | HOXA9-005         | homeobox A9                                                                    | processed_transcript    | 9606 | 7:2716368 | 1 |
| ENST00000524304 | HOXA-AS3-002      | HOXA cluster antisense RNA 3                                                   | antisense               | 9606 | 7:2715005 | 1 |
| ENST00000432796 | HOXD3-002         | homeobox D3                                                                    | protein_coding          | 9606 | 2:1761369 | 4 |
| ENST00000440016 | HOXD-AS2-001      | HOXD cluster antisense RNA 2                                                   | antisense               | 9606 | 2:1761216 | 4 |
| ENST00000419810 | HPCAL1-003        | hippocalcin-like 1                                                             | nonsense_mediated_decay | 9606 | 2:1032434 | 1 |
| ENST00000423674 | HPCAL1-004        | hippocalcin-like 1                                                             | protein_coding          | 9606 | 2:1030288 | 1 |
| ENST00000422379 | HPS4-022          | Hermansky-Pudlak syndrome 4                                                    | protein_coding          | 9606 | 22:264642 | 2 |
| ENST00000586941 | HRK-004           | harakiri, BCL2 interacting protein                                             | processed_transcript    | 9606 | 12:116869 | 4 |
| ENST00000520507 | HRSP12-007        | heat-responsive protein 12                                                     | protein_coding          | 9606 | 8:9810243 | 2 |
| ENST00000520216 | HSD17B4-027       | hydroxysteroid (17-beta) dehydrogenase 4                                       | processed_transcript    | 9606 | 5:1194938 | 2 |
| ENST00000412419 | HSD17B7P1-001     | hydroxysteroid (17-beta) dehydrogenase 7 pseudogene 1                          | processed_pseudogene    | 9606 | 1:2478274 | 1 |
| ENST00000592607 | HSD52-004         | uncharacterized LOC729467                                                      | lincRNA                 | 9606 | 1:5913237 | 2 |
| ENST00000467434 | HSDL2-004         | hydroxysteroid dehydrogenase like 2                                            | processed_transcript    | 9606 | 9:1123801 | 2 |
| ENST00000530524 | HSPD1P2-001       | heat shock 60kDa protein 1 (chaperonin) pseudogene 2                           | processed_pseudogene    | 9606 | 8:7891003 | 2 |
| ENST00000371951 | HTR2C-001         | 5-hydroxytryptamine (serotonin) receptor 2C, G protein-coupled                 | protein_coding          | 9606 | X:1145840 | 1 |
| ENST00000521124 | HTR4-005          | 5-hydroxytryptamine (serotonin) receptor 4, G protein-coupled                  | retained_intron         | 9606 | 5:1485093 | 2 |
| ENST00000487366 | HYI-006           | hydroxyppyruvate isomerase (putative)                                          | protein_coding          | 9606 | 1:4345115 | 6 |
| ENST00000532519 | HYOU1-201         | hypoxia up-regulated 1                                                         | protein_coding          | 9606 | 11:119045 | 2 |
| ENST00000512800 | ICE2P1-001        | interactor of little elongator complex ELL subunit 2 pseudogene 1              | processed_pseudogene    | 9606 | 4:1883874 | 2 |
| ENST00000380851 | IDH3B-010         | isocitrate dehydrogenase 3 (NAD+) beta                                         | protein_coding          | 9606 | 20:265839 | 1 |
| ENST00000506561 | IDUA-009          | iduronidase, alpha-L-                                                          | retained_intron         | 9606 | 4:987076  | 2 |
| ENST00000471408 | IFFO1-004         | intermediate filament family orphan 1                                          | retained_intron         | 9606 | 12:653896 | 1 |
| ENST00000536664 | IFI27L1-007       | interferon, alpha-inducible protein 27-like 1                                  | protein_coding          | 9606 | 14:940813 | 2 |
| ENST00000259555 | IFNA6-201         | interferon, alpha 6                                                            | protein_coding          | 9606 | 9:2135025 | 1 |
| ENST00000466459 | IFRD1-016         | interferon-related developmental regulator 1                                   | processed_transcript    | 9606 | 7:1124569 | 2 |
| ENST00000546374 | IFT81-004         | intraflagellar transport 81                                                    | protein_coding          | 9606 | 12:110124 | 2 |
| ENST00000551273 | IFT81-005         | intraflagellar transport 81                                                    | nonsense_mediated_decay | 9606 | 12:110132 | 2 |
| ENST00000561309 | IGDCC4-004        | immunoglobulin superfamily, DCC subclass, member 4                             | retained_intron         | 9606 | 15:653848 | 1 |
| ENST00000601052 | IGFL2-006         | IGF-like family member 2                                                       | protein_coding          | 9606 | 19:461606 | 2 |
| ENST00000568775 | IGHV3OR16-6-001   | immunoglobulin heavy variable 3/OR16-6 (pseudogene)                            | IG_V_pseudogene         | 9606 | 16:329150 | 1 |
| ENST00000342002 | IKZF2-002         | IKAROS family zinc finger 2 (Helios)                                           | protein_coding          | 9606 | 2:2130053 | 2 |
| ENST00000454992 | IL17RE-010        | interleukin 17 receptor E                                                      | protein_coding          | 9606 | 3:9902882 | 2 |
| ENST00000409329 | IL1R1-004         | interleukin 1 receptor, type I                                                 | protein_coding          | 9606 | 2:1021045 | 1 |
| ENST00000413869 | IL1RAP-004        | interleukin 1 receptor accessory protein                                       | nonsense_mediated_decay | 9606 | 3:1905141 | 2 |
| ENST00000429622 | IL2RB-005         | interleukin 2 receptor, beta                                                   | protein_coding          | 9606 | 22:371376 | 2 |
| ENST00000531965 | IL32-003          | interleukin 32                                                                 | protein_coding          | 9606 | 16:306532 | 1 |
| ENST00000552664 | IL32-031          | interleukin 32                                                                 | protein_coding          | 9606 | 16:306566 | 2 |
| ENST00000462418 | IL5-003           | interleukin 5                                                                  | retained_intron         | 9606 | 5:1325420 | 1 |
| ENST00000336909 | IL6ST-201         | interleukin 6 signal transducer                                                | protein_coding          | 9606 | 5:5593509 | 2 |
| ENST00000614979 | ILDR2-008         | immunoglobulin-like domain containing receptor 2                               | processed_transcript    | 9606 | 1:1669080 | 3 |
| ENST00000547970 | INHBE-003         | inhibin, beta E                                                                | protein_coding          | 9606 | 12:574547 | 1 |
| ENST00000523221 | INPP4A-009        | inositol polyphosphate-4-phosphatase, type I, 107kDa                           | protein_coding          | 9606 | 2:9852004 | 2 |
| ENST00000420017 | INPP5J-011        | inositol polyphosphate-5-phosphatase J                                         | protein_coding          | 9606 | 22:311229 | 2 |
| ENST00000576646 | INPP5K-020        | inositol polyphosphate-5-phosphatase K                                         | nonsense_mediated_decay | 9606 | 17:150708 | 4 |
| ENST00000476665 | IQCE-004          | IQ motif containing E                                                          | protein_coding          | 9606 | 7:2559079 | 1 |
| ENST00000416896 | IQCG-008          | IQ motif containing G                                                          | protein_coding          | 9606 | 3:1979260 | 2 |
| ENST00000596822 | IRF3-017          | interferon regulatory factor 3                                                 | protein_coding          | 9606 | 19:496595 | 2 |
| ENST00000464557 | IRF5-010          | interferon regulatory factor 5                                                 | protein_coding          | 9606 | 7:1289379 | 2 |
| ENST00000532096 | IRF7-011          | interferon regulatory factor 7                                                 | retained_intron         | 9606 | 11:614090 | 1 |
| ENST00000595910 | ISLR-003          | immunoglobulin superfamily containing leucine-rich repeat                      | protein_coding          | 9606 | 15:741741 | 3 |
| ENST00000509814 | ITGA2-004         | integrin, alpha 2 (CD49B, alpha 2 subunit of VLA-2 receptor)                   | nonsense_mediated_decay | 9606 | 5:5298944 | 1 |
| ENST00000475438 | ITGB6-003         | integrin, beta 6                                                               | processed_transcript    | 9606 | 2:1601015 | 2 |
| ENST00000274766 | KAAG1-001         | kidney associated antigen 1                                                    | protein_coding          | 9606 | 6:2435690 | 1 |
| ENST00000543774 | KAT8-001          | K(lysine) acetyltransferase 8                                                  | protein_coding          | 9606 | 16:311157 | 1 |
| ENST00000604350 | KB-1410C5.4-001   |                                                                                | processed_pseudogene    | 9606 | 8:1013374 | 2 |
| ENST00000521884 | KB-1460A1.2-001   |                                                                                | lincRNA                 | 9606 | 8:1011289 | 2 |
| ENST00000403813 | KCNQ5-204         | potassium voltage-gated channel, KQT-like subfamily, member 5                  | protein_coding          | 9606 | 6:7262184 | 2 |
| ENST00000600980 | KDEL1-005         | KDEL (Lys-Asp-Glu-Leu) endoplasmic reticulum protein retention receptor 1      | protein_coding          | 9606 | 19:483842 | 2 |
| ENST00000438023 | KDM4C-011         | lysine (K)-specific demethylase 4C                                             | nonsense_mediated_decay | 9606 | 9:6757641 | 1 |
| ENST00000580882 | KIAA0100-005      | KIAA0100                                                                       | retained_intron         | 9606 | 17:286390 | 1 |
| ENST00000415042 | KIF1A-012         | kinesin family member 1A                                                       | protein_coding          | 9606 | 2:2407440 | 2 |
| ENST00000422435 | KIF21B-006        | kinesin family member 21B                                                      | protein_coding          | 9606 | 1:2009738 | 1 |
| ENST00000558346 | KIF23-004         | kinesin family member 23                                                       | nonsense_mediated_decay | 9606 | 15:694143 | 1 |
| ENST00000538893 | KIF6-201          | kinesin family member 6                                                        | protein_coding          | 9606 | 6:3934333 | 1 |
| ENST00000458248 | KLHL22-010        | kelch-like family member 22                                                    | protein_coding          | 9606 | 22:204652 | 2 |
| ENST00000326856 | KLK15-001         | kallikrein-related peptidase 15                                                | protein_coding          | 9606 | 19:508253 | 1 |
| ENST00000539370 | KLRC4-KLKR1-001   | KLRC4-KLKR1 readthrough                                                        | retained_intron         | 9606 | 12:103793 | 1 |
| ENST00000590983 | KNSTRN-014        | kinetochore-localized astrin/SPAG5 binding protein                             | nonsense_mediated_decay | 9606 | 15:403832 | 2 |
| ENST00000468313 | KRT13-003         | keratin 13                                                                     | retained_intron         | 9606 | 17:415009 | 1 |
| ENST00000458290 | KRT15-006         | keratin 15                                                                     | protein_coding          | 9606 | 17:415155 | 4 |
| ENST00000580052 | KRT16P4-002       | keratin 16 pseudogene 4                                                        | processed_transcript    | 9606 | 17:184506 | 1 |
| ENST00000264651 | KRT24-001         | keratin 24                                                                     | protein_coding          | 9606 | 17:406979 | 1 |
| ENST00000551956 | KRT4-001          | keratin 4                                                                      | protein_coding          | 9606 | 12:528065 | 4 |
| ENST00000267119 | KRT71-001         | keratin 71                                                                     | protein_coding          | 9606 | 12:525439 | 2 |
| ENST00000332411 | KRT76-001         | keratin 76                                                                     | protein_coding          | 9606 | 12:527681 | 3 |
| ENST00000257901 | KRT85-001         | keratin 85                                                                     | protein_coding          | 9606 | 12:523600 | 2 |
| ENST00000616689 | KRTAP10-7-201     | keratin associated protein 10-7                                                | protein_coding          | 9606 | 21:446006 | 1 |
| ENST00000391415 | KRTAP4-9-001      | keratin associated protein 4-9                                                 | protein_coding          | 9606 | 17:411053 | 1 |
| ENST00000506319 | KY-002            | kyphoscoliosis peptidase                                                       | retained_intron         | 9606 | 3:1346070 | 1 |
| ENST00000418998 | L3MBTL1-201       | l(3)mbt-like 1 (Drosophila)                                                    | protein_coding          | 9606 | 20:435076 | 2 |
| ENST00000572086 | LA16c-380H5.3-001 |                                                                                | lincRNA                 | 9606 | 16:299990 | 1 |
| ENST00000417863 | LA16c-60G3.8-001  |                                                                                | processed_pseudogene    | 9606 | 22:155620 | 2 |
| ENST00000517601 | LACTB2-004        | lactamase, beta 2                                                              | processed_transcript    | 9606 | 8:706385  | 2 |
| ENST00000393560 | LAMB1-002         | laminin, beta 1                                                                | protein_coding          | 9606 | 7:1079595 | 2 |
| ENST00000434071 | LARGE-005         | like-glycosyltransferase                                                       | protein_coding          | 9606 | 22:336504 | 1 |
| ENST00000528924 | LAYN-010          | layilin                                                                        | processed_transcript    | 9606 | 11:111541 | 2 |
| ENST00000528102 | LAYN-011          | layilin                                                                        | protein_coding          | 9606 | 11:111541 | 1 |
| ENST00000587600 | LDLRAD4-014       | low density lipoprotein receptor class A domain containing 4                   | processed_transcript    | 9606 | 18:134650 | 4 |
| ENST00000505328 | LEF1-015          | lymphoid enhancer-binding factor 1                                             | retained_intron         | 9606 | 4:1080704 | 1 |
| ENST00000371060 | LEPR-002          | leptin receptor                                                                | protein_coding          | 9606 | 1:6542065 | 1 |
| ENST00000489504 | LILRA5-004        | leukocyte immunoglobulin-like receptor, subfamily A (with TM domain), member 5 | retained_intron         | 9606 | 19:543111 | 2 |
| ENST00000452561 | LINC00320-004     | long intergenic non-protein coding RNA 320                                     | lincRNA                 | 9606 | 21:207429 | 1 |
| ENST00000427717 | LINC00379-002     | long intergenic non-protein coding RNA 379                                     | lincRNA                 | 9606 | 13:911276 | 2 |

|                 |                      |                                                                                             |                              |      |             |
|-----------------|----------------------|---------------------------------------------------------------------------------------------|------------------------------|------|-------------|
| ENST00000452852 | LINC00393-002        | long intergenic non-protein coding RNA 393                                                  | lincRNA                      | 9606 | 13:735463 2 |
| ENST00000580336 | LINC00470-007        | long intergenic non-protein coding RNA 470                                                  | lincRNA                      | 9606 | 18:136829 2 |
| ENST00000582570 | LINC00470-008        | long intergenic non-protein coding RNA 470                                                  | lincRNA                      | 9606 | 18:136808 1 |
| ENST00000496285 | LINC00518-001        | long intergenic non-protein coding RNA 518                                                  | lincRNA                      | 9606 | 6:1042925 1 |
| ENST00000426364 | LINC00633-002        | long intergenic non-protein coding RNA 633                                                  | lincRNA                      | 9606 | X:1351189 1 |
| ENST00000473528 | LINC00635-005        | long intergenic non-protein coding RNA 635                                                  | lincRNA                      | 9606 | 3:1078673 2 |
| ENST00000552608 | LINC00661-003        | long intergenic non-protein coding RNA 661                                                  | lincRNA                      | 9606 | 19:160219 1 |
| ENST00000596203 | LINC00664-004        | long intergenic non-protein coding RNA 664                                                  | lincRNA                      | 9606 | 19:214942 1 |
| ENST00000556886 | LINC00871-002        | long intergenic non-protein coding RNA 871                                                  | lincRNA                      | 9606 | 14:460641 2 |
| ENST00000487512 | LINC00901-001        | long intergenic non-protein coding RNA 901                                                  | antisense                    | 9606 | 3:1169214 1 |
| ENST00000558754 | LINC00925-008        | long intergenic non-protein coding RNA 925                                                  | lincRNA                      | 9606 | 15:893785 2 |
| ENST00000560917 | LINC00933-003        | long intergenic non-protein coding RNA 933                                                  | processed_transcript         | 9606 | 15:845706 2 |
| ENST00000529135 | LINC00964-004        | long intergenic non-protein coding RNA 964                                                  | lincRNA                      | 9606 | 8:1249403 2 |
| ENST00000614200 | LINC01002-006        | long intergenic non-protein coding RNA 1002                                                 | lincRNA                      | 9606 | 19:211647 2 |
| ENST00000617826 | LINC01002-026        | long intergenic non-protein coding RNA 1002                                                 | lincRNA                      | 9606 | 19:205170 2 |
| ENST00000611441 | LINC01002-038        | long intergenic non-protein coding RNA 1002                                                 | lincRNA                      | 9606 | 19:201404 2 |
| ENST00000458683 | LINC01036-001        | long intergenic non-protein coding RNA 1036                                                 | lincRNA                      | 9606 | 1:1870928 2 |
| ENST00000514130 | LINC01094-006        | long intergenic non-protein coding RNA 1094                                                 | lincRNA                      | 9606 | 4:7864608 2 |
| ENST00000603837 | LINC01109-001        | long intergenic non-protein coding RNA 1109                                                 | lincRNA                      | 9606 | 8:7640405 2 |
| ENST00000415295 | LINC01128-007        | long intergenic non-protein coding RNA 1128                                                 | lincRNA                      | 9606 | 1:8316051 1 |
| ENST00000508878 | LINC01184-004        | long intergenic non-protein coding RNA 1184                                                 | lincRNA                      | 9606 | 5:1280240 1 |
| ENST00000594576 | LINC01224-009        | long intergenic non-protein coding RNA 1224                                                 | lincRNA                      | 9606 | 19:234032 4 |
| ENST00000563550 | LINC01225-002        | long intergenic non-protein coding RNA 1225                                                 | unitary_pseudogene           | 9606 | 1:3150139 1 |
| ENST00000541162 | LINC01252-002        | long intergenic non-protein coding RNA 1252                                                 | lincRNA                      | 9606 | 12:115569 2 |
| ENST00000601505 | LINC01435-002        | long intergenic non-protein coding RNA 1435                                                 | lincRNA                      | 9606 | 10:108039 2 |
| ENST00000595603 | LINC01435-014        | long intergenic non-protein coding RNA 1435                                                 | lincRNA                      | 9606 | 10:108040 1 |
| ENST00000595737 | LINC01515-008        | long intergenic non-protein coding RNA 1515                                                 | lincRNA                      | 9606 | 10:656157 1 |
| ENST00000429510 | LIPH-004             | lipase, member H                                                                            | nonsense_mediated_decay      | 9606 | 3:1855336 1 |
| ENST00000620649 | LL22NC03-23C6.13-001 |                                                                                             | lincRNA                      | 9606 | 22:220363 2 |
| ENST00000424192 | LMO3-002             | LIM domain only 3 (rhombotin-like 2)                                                        | nonsense_mediated_decay      | 9606 | 12:165509 2 |
| ENST00000536509 | LMO3-023             | LIM domain only 3 (rhombotin-like 2)                                                        | processed_transcript         | 9606 | 12:165604 2 |
| ENST00000537757 | LMO3-024             | LIM domain only 3 (rhombotin-like 2)                                                        | protein_coding               | 9606 | 12:165513 2 |
| ENST00000544276 | LMO3-026             | LIM domain only 3 (rhombotin-like 2)                                                        | processed_transcript         | 9606 | 12:165988 2 |
| ENST00000341547 | LMO7-001             | LIM domain 7                                                                                | protein_coding               | 9606 | 13:756204 2 |
| ENST00000510785 | LN1-AS1-001          | LN1 antisense RNA 1                                                                         | antisense                    | 9606 | 4:5350007 1 |
| ENST00000398686 | LOXHD1-008           | lipoxygenase homology domains 1                                                             | protein_coding               | 9606 | 18:464772 1 |
| ENST00000591528 | LPHN1-007            | latrophilin 1                                                                               | processed_transcript         | 9606 | 19:141629 2 |
| ENST00000485583 | LRCH4-007            | leucine-rich repeats and calponin homology (CH) domain containing 4                         | retained_intron              | 9606 | 7:1005821 1 |
| ENST00000550945 | LRMP-006             | lymphoid-restricted membrane protein                                                        | protein_coding               | 9606 | 12:250522 1 |
| ENST00000520770 | LRP12-007            | low density lipoprotein receptor-related protein 12                                         | processed_transcript         | 9606 | 8:1044977 2 |
| ENST00000442974 | LRP1B-005            | low density lipoprotein receptor-related protein 1B                                         | protein_coding               | 9606 | 2:1402381 2 |
| ENST00000559399 | LRRC28-017           | leucine rich repeat containing 28                                                           | processed_transcript         | 9606 | 15:992513 1 |
| ENST00000563189 | LRRC36-004           | leucine rich repeat containing 36                                                           | protein_coding               | 9606 | 16:673473 2 |
| ENST00000570311 | LRRC37A17P-001       | leucine rich repeat containing 37, member A17, pseudogene                                   | transcribed_unprocessed_pseu | 9606 | 17:470171 1 |
| ENST00000487826 | LRRC4-003            | leucine rich repeat containing 4                                                            | protein_coding               | 9606 | 7:1280304 2 |
| ENST00000588515 | LRRC7-004            | leucine rich repeat containing 7                                                            | nonsense_mediated_decay      | 9606 | 1:7010775 2 |
| ENST00000216450 | LRRC74A-001          | leucine rich repeat containing 74A                                                          | nonsense_mediated_decay      | 9606 | 14:768263 2 |
| ENST00000460005 | LRRC74A-003          | leucine rich repeat containing 74A                                                          | processed_transcript         | 9606 | 14:768263 1 |
| ENST00000472068 | LRSAM1-012           | leucine rich repeat and sterile alpha motif containing 1                                    | processed_transcript         | 9606 | 9:1274799 2 |
| ENST00000543818 | LRTM2-201            | leucine-rich repeats and transmembrane domains 2                                            | protein_coding               | 9606 | 12:182026 1 |
| ENST00000490035 | LSAMP-001            | limbic system-associated membrane protein                                                   | protein_coding               | 9606 | 3:1158023 1 |
| ENST00000436601 | LSM3P3-001           | LSM3 pseudogene 3                                                                           | processed_pseudogene         | 9606 | 2:8510238 2 |
| ENST00000419073 | LST1-018             | leukocyte specific transcript 1                                                             | processed_transcript         | 9606 | 6:3158708 2 |
| ENST00000471842 | LTA-004              | lymphotoxin alpha                                                                           | retained_intron              | 9606 | 6:3157229 1 |
| ENST00000314174 | LUZP1-001            | leucine zipper protein 1                                                                    | protein_coding               | 9606 | 1:2309042 1 |
| ENST00000479606 | LZTR1-002            | leucine-zipper-like transcription regulator 1                                               | processed_transcript         | 9606 | 22:209794 2 |
| ENST00000375722 | MAGED1-005           | melanoma antigen family D, 1                                                                | protein_coding               | 9606 | X:5189353 1 |
| ENST00000463787 | MAGED2-009           | melanoma antigen family D, 2                                                                | processed_transcript         | 9606 | X:5480775 1 |
| ENST00000396224 | MAGED2-203           | melanoma antigen family D, 2                                                                | protein_coding               | 9606 | X:5480906 1 |
| ENST00000425952 | MAP3K19-009          | mitogen-activated protein kinase kinase 19                                                  | protein_coding               | 9606 | 2:1349989 2 |
| ENST00000399925 | MAP3K7CL-011         | MAP3K7 C-terminal like                                                                      | protein_coding               | 9606 | 21:291309 2 |
| ENST00000618822 | MAP7-204             | microtubule-associated protein 7                                                            | protein_coding               | 9606 | 6:1363422 2 |
| ENST00000379248 | MAP9-004             | microtubule-associated protein 9                                                            | protein_coding               | 9606 | 4:1553681 2 |
| ENST00000435438 | MAPRE1P3-001         | MAPRE1 pseudogene 3                                                                         | processed_pseudogene         | 9606 | 2:1652852 2 |
| ENST00000395769 | MARCB8-001           | membrane-associated ring finger (C3HC4) 8, E3 ubiquitin protein ligase                      | protein_coding               | 9606 | 10:454575 4 |
| ENST00000425897 | MARK2-012            | MAP/microtubule affinity-regulating kinase 2                                                | protein_coding               | 9606 | 11:638952 4 |
| ENST00000447721 | MARS-005             | methionyl-tRNA synthetase                                                                   | processed_transcript         | 9606 | 12:574880 1 |
| ENST00000337774 | MASP1-001            | mannan-binding lectin serine peptidase 1 (C4/C2 activating component of Ra-reactive factor) | protein_coding               | 9606 | 3:1872172 2 |
| ENST00000345429 | MBNL2-001            | muscleblind-like splicing regulator 2                                                       | protein_coding               | 9606 | 13:972223 2 |
| ENST00000589410 | MCSR-002             | melanocortin 5 receptor                                                                     | protein_coding               | 9606 | 18:138241 1 |
| ENST00000512218 | MCCC2-002            | methylcrotonoyl-CoA carboxylase 2 (beta)                                                    | nonsense_mediated_decay      | 9606 | 5:7158728 1 |
| ENST00000536274 | MCF2-202             | MCF.2 cell line derived transforming sequence                                               | protein_coding               | 9606 | X:1395817 1 |
| ENST00000507214 | MCTP1-016            | multiple C2 domains, transmembrane 1                                                        | protein_coding               | 9606 | 5:9491285 2 |
| ENST00000581054 | MED24-028            | mediator complex subunit 24                                                                 | retained_intron              | 9606 | 17:400359 1 |
| ENST00000523671 | MEG3-014             | maternally expressed 3 (non-protein coding)                                                 | lincRNA                      | 9606 | 14:100829 1 |
| ENST00000452349 | MEG9-002             | maternally expressed 9 (non-protein coding)                                                 | lincRNA                      | 9606 | 14:101071 2 |
| ENST00000561040 | MEIS3-010            | Meis homeobox 3                                                                             | retained_intron              | 9606 | 19:474158 2 |
| ENST00000619894 | Metazoa_SRP.1-316    | Metazoa signal recognition particle RNA                                                     | misc_RNA                     | 9606 | 22:215551 2 |
| ENST00000613101 | Metazoa_SRP.1-362    | Metazoa signal recognition particle RNA                                                     | misc_RNA                     | 9606 | 7:1520251 2 |
| ENST00000461754 | Metazoa_SRP.1-382    | Metazoa signal recognition particle RNA                                                     | misc_RNA                     | 9606 | 2:2505803 2 |
| ENST00000579643 | Metazoa_SRP.1-417    | Metazoa signal recognition particle RNA                                                     | misc_RNA                     | 9606 | 17:470418 1 |
| ENST00000621608 | Metazoa_SRP.1-445    | Metazoa signal recognition particle RNA                                                     | misc_RNA                     | 9606 | 2:1306034 1 |
| ENST00000466270 | METTL10-002          | methyltransferase like 10                                                                   | nonsense_mediated_decay      | 9606 | 10:124757 1 |
| ENST00000537825 | METTL5-012           | methyltransferase like 5                                                                    | nonsense_mediated_decay      | 9606 | 2:1698117 2 |
| ENST00000506764 | MFAP3L-007           | microfibrillar-associated protein 3-like                                                    | protein_coding               | 9606 | 4:1700056 2 |
| ENST00000428085 | MFS9-005             | major facilitator superfamily domain containing 9                                           | nonsense_mediated_decay      | 9606 | 2:1027190 2 |
| ENST00000482611 | MGEA5-006            | meningioma expressed antigen 5 (hyaluronidase)                                              | processed_transcript         | 9606 | 10:101786 2 |
| ENST00000449017 | MIATNB-003           | MIAT neighbor (non-protein coding)                                                          | lincRNA                      | 9606 | 22:266727 2 |
| ENST00000495076 | MICAL3-005           | microtubule associated monooxygenase, calponin and LIM domain containing 3                  | nonsense_mediated_decay      | 9606 | 22:178395 1 |
| ENST00000408338 | MIR1255A-201         | microRNA 1255a                                                                              | miRNA                        | 9606 | 4:1013303 2 |
| ENST00000524265 | MIR143HG-005         | MIR143 host gene (non-protein coding)                                                       | lincRNA                      | 9606 | 5:1494069 1 |
| ENST00000385240 | MIR181B1-201         | microRNA 181b-1                                                                             | miRNA                        | 9606 | 1:1988588 2 |
| ENST00000579966 | MIR378H-201          | microRNA 378h                                                                               | miRNA                        | 9606 | 5:1548294 2 |

|                 |               |                                                                                                                    |                              |      |             |
|-----------------|---------------|--------------------------------------------------------------------------------------------------------------------|------------------------------|------|-------------|
| ENST00000566533 | MIR3976HG-001 | MIR3976 host gene (non-protein coding)                                                                             | lincRNA                      | 9606 | 18:574881 1 |
| ENST00000390180 | MIR454-201    | microRNA 454                                                                                                       | miRNA                        | 9606 | 17:591377 1 |
| ENST00000586239 | MIR490-003    | microRNA 490                                                                                                       | antisense                    | 9606 | 7:1366855 2 |
| ENST00000583467 | MIR5188-201   | microRNA 5188                                                                                                      | miRNA                        | 9606 | 12:124915 1 |
| ENST00000577370 | MIR5189-201   | microRNA 5189                                                                                                      | miRNA                        | 9606 | 16:884689 1 |
| ENST00000579892 | MIR5192-201   | microRNA 5192                                                                                                      | miRNA                        | 9606 | 2:6220582 2 |
| ENST00000408833 | MIR548J-201   | microRNA 548j                                                                                                      | miRNA                        | 9606 | 22:265552 1 |
| ENST00000408742 | MIR548N-201   | microRNA 548n                                                                                                      | miRNA                        | 9606 | 7:3494076 2 |
| ENST00000385017 | MIR553-201    | microRNA 553                                                                                                       | miRNA                        | 9606 | 1:1002812 2 |
| ENST00000385256 | MIR601-201    | microRNA 601                                                                                                       | miRNA                        | 9606 | 9:1234025 2 |
| ENST00000609914 | MIR663AHG-031 | MIR663A host gene (non-protein coding)                                                                             | lincRNA                      | 9606 | 20:261877 2 |
| ENST00000618442 | MIR6752-201   | microRNA 6752                                                                                                      | miRNA                        | 9606 | 11:674902 2 |
| ENST00000390702 | MIR676-201    | microRNA 676                                                                                                       | miRNA                        | 9606 | X:7002282 2 |
| ENST00000619908 | MIR6783-201   | microRNA 6783                                                                                                      | miRNA                        | 9606 | 17:449346 2 |
| ENST00000614393 | MIR7150-201   | microRNA 7150                                                                                                      | miRNA                        | 9606 | 9:1234855 2 |
| ENST00000401154 | MIR933-201    | microRNA 933                                                                                                       | miRNA                        | 9606 | 2:1751676 2 |
| ENST00000362105 | MIRLET7A2-201 | microRNA let-7a-2                                                                                                  | miRNA                        | 9606 | 11:122146 2 |
| ENST00000394351 | MITF-004      | microphthalmia-associated transcription factor                                                                     | protein_coding               | 9606 | 3:6993660 2 |
| ENST00000461511 | MITF-011      | microphthalmia-associated transcription factor                                                                     | retained_intron              | 9606 | 3:6973947 2 |
| ENST00000484301 | MKNK1-005     | MAP kinase interacting serine/threonine kinase 1                                                                   | retained_intron              | 9606 | 1:4657373 1 |
| ENST00000542390 | MMAB-010      | methylmalonic aciduria (cobalamin deficiency) cblb type                                                            | retained_intron              | 9606 | 12:109561 2 |
| ENST00000542305 | MMP20-002     | matrix metalloproteinase 20                                                                                        | processed_transcript         | 9606 | 11:102577 1 |
| ENST00000441194 | MMS19-009     | MMS19 nucleotide excision repair homolog (S. cerevisiae)                                                           | nonsense_mediated_decay      | 9606 | 10:974696 1 |
| ENST00000376894 | MOG-002       | myelin oligodendrocyte glycoprotein                                                                                | protein_coding               | 9606 | 6:2965709 1 |
| ENST00000414701 | MOGS-007      | mannosyl-oligosaccharide glucosidase                                                                               | protein_coding               | 9606 | 2:7446299 2 |
| ENST00000484985 | MON1A-007     | MON1 secretory trafficking family member A                                                                         | processed_transcript         | 9606 | 3:4991153 1 |
| ENST00000393529 | MPP1-016      | membrane protein, palmitoylated 1, 55kDa                                                                           | protein_coding               | 9606 | X:1547842 2 |
| ENST00000528686 | MPPED2-002    | metallophosphoesterase domain containing 2                                                                         | protein_coding               | 9606 | 11:305360 1 |
| ENST00000402310 | MPV17-004     | MpV17 mitochondrial inner membrane protein                                                                         | protein_coding               | 9606 | 2:2730949 2 |
| ENST00000503890 | MROH2B-004    | maestro heat-like repeat family member 2B                                                                          | retained_intron              | 9606 | 5:4099802 1 |
| ENST00000467306 | MRPL9-003     | mitochondrial ribosomal protein L9                                                                                 | processed_transcript         | 9606 | 1:1517596 4 |
| ENST00000492684 | MRPL9-008     | mitochondrial ribosomal protein L9                                                                                 | processed_transcript         | 9606 | 1:1517615 4 |
| ENST00000515647 | MRPS30-002    | mitochondrial ribosomal protein S30                                                                                | processed_transcript         | 9606 | 5:4480984 2 |
| ENST00000606974 | MRPS31P5-003  | mitochondrial ribosomal protein S31 pseudogene 5                                                                   | processed_transcript         | 9606 | 13:521712 2 |
| ENST00000607588 | MRPS31P5-005  | mitochondrial ribosomal protein S31 pseudogene 5                                                                   | processed_transcript         | 9606 | 13:521690 2 |
| ENST00000512880 | MRPS36-002    | mitochondrial ribosomal protein S36                                                                                | protein_coding               | 9606 | 5:6921783 2 |
| ENST00000519284 | MRPS36P3-001  | mitochondrial ribosomal protein S36 pseudogene 3                                                                   | processed_pseudogene         | 9606 | 8:1220914 2 |
| ENST00000373729 | MRRF-004      | mitochondrial ribosome recycling factor                                                                            | protein_coding               | 9606 | 9:1222649 2 |
| ENST00000558540 | MRV11-015     | murine retrovirus integration site 1 homolog                                                                       | protein_coding               | 9606 | 11:105757 2 |
| ENST00000300187 | MS4A14-002    | membrane-spanning 4-domains, subfamily A, member 14                                                                | protein_coding               | 9606 | 11:603963 1 |
| ENST00000525686 | MS4A3-005     | membrane-spanning 4-domains, subfamily A, member 3 (hematopoietic cell-specific)                                   | nonsense_mediated_decay      | 9606 | 11:600567 2 |
| ENST00000521739 | MSC-003       | musculin                                                                                                           | processed_transcript         | 9606 | 8:7184242 2 |
| ENST00000565838 | MT3-003       | metallothionein 3                                                                                                  | protein_coding               | 9606 | 16:565890 2 |
| ENST00000400050 | MTCL1-201     | microtubule crosslinking factor 1                                                                                  | protein_coding               | 9606 | 18:871789 2 |
| ENST00000422088 | MTCO3P1-001   | MT-CO3 pseudogene 1                                                                                                | unprocessed_pseudogene       | 9606 | 6:3270612 1 |
| ENST00000401524 | MTCYBP4-001   | MT-CYB pseudogene 4                                                                                                | processed_pseudogene         | 9606 | 6:1331505 1 |
| ENST00000374303 | MTFR1L-201    | mitochondrial fission regulator 1-like                                                                             | protein_coding               | 9606 | 1:2581990 1 |
| ENST00000527338 | MTFR2-005     | mitochondrial fission regulator 2                                                                                  | retained_intron              | 9606 | 6:1362486 1 |
| ENST00000472005 | MTG2-005      | mitochondrial ribosome-associated GTPase 2                                                                         | processed_transcript         | 9606 | 20:621935 2 |
| ENST00000515074 | MTHFD2P4-001  | methylenetetrahydrofolate dehydrogenase (NADP+ dependent) 2, methylenetetrahydrofolate cyclohydrolase pseudogene 4 | processed_pseudogene         | 9606 | 4:1623221 2 |
| ENST00000320415 | MTHFD2P5-001  | methylenetetrahydrofolate dehydrogenase (NADP+ dependent) 2, methylenetetrahydrofolate cyclohydrolase pseudogene 5 | processed_pseudogene         | 9606 | 7:8258984 3 |
| ENST00000567539 | MTHFSD-013    | methylenetetrahydrofolate synthetase domain containing                                                             | nonsense_mediated_decay      | 9606 | 16:865323 2 |
| ENST00000417741 | MTIF2-006     | mitochondrial translational initiation factor 2                                                                    | processed_transcript         | 9606 | 2:5525254 2 |
| ENST00000490530 | MTM1-004      | myotubularin 1                                                                                                     | processed_transcript         | 9606 | X:1505686 2 |
| ENST00000465177 | MTND1P16-001  | MT-ND1 pseudogene 16                                                                                               | unprocessed_pseudogene       | 9606 | 3:1069010 1 |
| ENST00000438556 | MTND1P34-001  | MT-ND1 pseudogene 34                                                                                               | transcribed_processed_pseudo | 9606 | 1:4716451 1 |
| ENST00000418575 | MTND2P15-001  | MT-ND2 pseudogene 15                                                                                               | processed_pseudogene         | 9606 | 10:695940 1 |
| ENST00000453434 | MTND2P24-001  | MT-ND2 pseudogene 24                                                                                               | processed_pseudogene         | 9606 | X:5517918 4 |
| ENST00000449028 | MTND2P25-001  | MT-ND2 pseudogene 25                                                                                               | processed_pseudogene         | 9606 | X:6284369 1 |
| ENST00000438452 | MTND3P2-001   | MT-ND3 pseudogene 2                                                                                                | unprocessed_pseudogene       | 9606 | 7:6410565 1 |
| ENST00000429526 | MTND3P9-001   | MT-ND3 pseudogene 9                                                                                                | processed_pseudogene         | 9606 | 2:1430984 1 |
| ENST00000413116 | MTND4P22-001  | MT-ND4 pseudogene 22                                                                                               | processed_pseudogene         | 9606 | 2:1430968 1 |
| ENST00000435821 | MTND4P5-001   | MT-ND4 pseudogene 5                                                                                                | unprocessed_pseudogene       | 9606 | 7:5719269 1 |
| ENST00000513046 | MTND5P13-001  | MT-ND5 pseudogene 13                                                                                               | processed_pseudogene         | 9606 | 4:6460945 2 |
| ENST00000430812 | MTND5P23-001  | MT-ND5 pseudogene 23                                                                                               | unprocessed_pseudogene       | 9606 | 2:1313704 1 |
| ENST00000438536 | MTND5P3-001   | MT-ND5 pseudogene 3                                                                                                | processed_pseudogene         | 9606 | 13:845217 1 |
| ENST00000562883 | MTSS1L-003    | metastasis suppressor 1-like                                                                                       | protein_coding               | 9606 | 16:706743 2 |
| ENST00000304887 | MUC7-001      | mucin 7, secreted                                                                                                  | protein_coding               | 9606 | 4:7047211 1 |
| ENST00000357175 | MUM1L1-002    | melanoma associated antigen (mutated) 1-like 1                                                                     | protein_coding               | 9606 | X:1061683 2 |
| ENST00000374439 | MUSK-003      | muscle, skeletal, receptor tyrosine kinase                                                                         | protein_coding               | 9606 | 9:1106872 1 |
| ENST00000529939 | MVB12A-008    | multivesicular body subunit 12A                                                                                    | protein_coding               | 9606 | 19:174200 2 |
| ENST00000481838 | MX2-003       | MX dynamin-like GTPase 2                                                                                           | processed_transcript         | 9606 | 21:413989 1 |
| ENST00000442647 | MYB-009       | v-myb avian myeloblastosis viral oncogene homolog                                                                  | protein_coding               | 9606 | 6:1351813 2 |
| ENST00000531737 | MYB-028       | v-myb avian myeloblastosis viral oncogene homolog                                                                  | nonsense_mediated_decay      | 9606 | 6:1351815 1 |
| ENST00000455534 | MYB-AS1-001   | MYB antisense RNA 1                                                                                                | antisense                    | 9606 | 6:1351950 1 |
| ENST00000596245 | MYO1F-018     | myosin IF                                                                                                          | retained_intron              | 9606 | 19:852522 2 |
| ENST00000598797 | MYO1F-019     | myosin IF                                                                                                          | retained_intron              | 9606 | 19:853004 1 |
| ENST00000409044 | MYO3B-001     | myosin IIIB                                                                                                        | protein_coding               | 9606 | 2:1701781 2 |
| ENST00000241651 | MYOG-001      | myogenin (myogenic factor 4)                                                                                       | protein_coding               | 9606 | 1:2030831 2 |
| ENST00000581075 | MYOM1-004     | myomesin 1                                                                                                         | nonsense_mediated_decay      | 9606 | 18:307573 2 |
| ENST00000401044 | MYSM1-002     | Myb-like, SWIRM and MPN domains 1                                                                                  | processed_transcript         | 9606 | 1:5865915 2 |
| ENST00000375944 | NAALAD2-009   | N-acetylated alpha-linked acidic dipeptidase 2                                                                     | protein_coding               | 9606 | 11:901347 2 |
| ENST00000414826 | NAALADL2-005  | N-acetylated alpha-linked acidic dipeptidase-like 2                                                                | nonsense_mediated_decay      | 9606 | 3:1752564 2 |
| ENST00000409510 | NABP1-010     | nucleic acid binding protein 1                                                                                     | protein_coding               | 9606 | 2:1916782 4 |
| ENST00000318548 | NACAP2-001    | nascent-polypeptide-associated complex alpha polypeptide pseudogene 2                                              | processed_pseudogene         | 9606 | 10:119997 3 |
| ENST00000490998 | NAGK-010      | N-acetylglucosamine kinase                                                                                         | retained_intron              | 9606 | 2:7107462 1 |
| ENST00000470245 | NAIF1-004     | nuclear apoptosis inducing factor 1                                                                                | processed_transcript         | 9606 | 9:1280612 2 |
| ENST00000605043 | NAMA-004      | non-protein coding RNA, associated with MAP kinase pathway and growth arrest                                       | lincRNA                      | 9606 | 9:9937435 1 |
| ENST00000526115 | NAP1L4-002    | nucleosome assembly protein 1-like 4                                                                               | protein_coding               | 9606 | 11:294511 1 |
| ENST00000523923 | NCALD-016     | neurocalcin delta                                                                                                  | protein_coding               | 9606 | 8:1017193 1 |
| ENST00000611284 | NCAM1-007     | neural cell adhesion molecule 1                                                                                    | processed_transcript         | 9606 | 11:113132 2 |
| ENST00000533073 | NCAM1-011     | neural cell adhesion molecule 1                                                                                    | processed_transcript         | 9606 | 11:113232 2 |
| ENST00000618266 | NCAM1-203     | neural cell adhesion molecule 1                                                                                    | protein_coding               | 9606 | 11:112961 3 |

|                 |              |                                                                                                     |                              |      |           |   |
|-----------------|--------------|-----------------------------------------------------------------------------------------------------|------------------------------|------|-----------|---|
| ENST00000484983 | NCAM2-002    | neural cell adhesion molecule 2                                                                     | processed_transcript         | 9606 | 21:214637 | 4 |
| ENST00000520297 | NCAPH2-014   | non-SMC condensin II complex, subunit H2                                                            | processed_transcript         | 9606 | 22:505195 | 2 |
| ENST00000612493 | NCOA6-201    | nuclear receptor coactivator 6                                                                      | protein_coding               | 9606 | 20:347147 | 1 |
| ENST00000450698 | NCOR2-004    | nuclear receptor corepressor 2                                                                      | protein_coding               | 9606 | 12:124419 | 1 |
| ENST00000455934 | NDUFS1-201   | NADH dehydrogenase (ubiquinone) Fe-S protein 1, 75kDa (NADH-coenzyme Q reductase)                   | protein_coding               | 9606 | 2:2061231 | 2 |
| ENST00000450668 | NDUFS5P3-001 | NADH dehydrogenase (ubiquinone) Fe-S protein 5, 15kDa (NADH-coenzyme Q reductase) pseudogene 3      | processed_pseudogene         | 9606 | 1:5270912 | 2 |
| ENST00000437256 | NDUFS5P5-001 | NADH dehydrogenase (ubiquinone) Fe-S protein 5, 15kDa (NADH-coenzyme Q reductase) pseudogene 5      | processed_pseudogene         | 9606 | 4:1184005 | 2 |
| ENST00000532244 | NDUFV1-008   | NADH dehydrogenase (ubiquinone) flavoprotein 1, 51kDa                                               | protein_coding               | 9606 | 11:676069 | 2 |
| ENST00000356462 | NEDD4L-005   | neural precursor cell expressed, developmentally down-regulated 4-like, E3 ubiquitin protein ligase | protein_coding               | 9606 | 18:580443 | 1 |
| ENST00000587881 | NEDD4L-030   | neural precursor cell expressed, developmentally down-regulated 4-like, E3 ubiquitin protein ligase | protein_coding               | 9606 | 18:583233 | 2 |
| ENST00000435750 | NEK10-005    | NIMA-related kinase 10                                                                              | protein_coding               | 9606 | 3:2732222 | 1 |
| ENST00000550139 | NELL2-015    | NEL-like 2 (chicken)                                                                                | protein_coding               | 9606 | 12:445227 | 1 |
| ENST00000547636 | NELL2-016    | NEL-like 2 (chicken)                                                                                | retained_intron              | 9606 | 12:445219 | 2 |
| ENST00000547172 | NELL2-018    | NEL-like 2 (chicken)                                                                                | processed_transcript         | 9606 | 12:447796 | 1 |
| ENST00000558807 | NEO1-009     | neogenin 1                                                                                          | retained_intron              | 9606 | 15:732547 | 2 |
| ENST00000588287 | NF1P5-001    | neurofibromin 1 pseudogene 5                                                                        | processed_pseudogene         | 9606 | 18:141530 | 2 |
| ENST00000553469 | NFATC4-011   | nuclear factor of activated T-cells, cytoplasmic, calcineurin-dependent 4                           | protein_coding               | 9606 | 14:243675 | 1 |
| ENST00000557140 | NFKBIA-002   | nuclear factor of kappa light polypeptide gene enhancer in B-cells inhibitor, alpha                 | protein_coding               | 9606 | 14:354015 | 2 |
| ENST00000531755 | NFRKB-004    | nuclear factor related to kappaB binding protein                                                    | protein_coding               | 9606 | 11:129870 | 1 |
| ENST00000417799 | NIFK3-001    | nucleolar protein interacting with the FHA domain of MKI67 pseudogene 3                             | processed_pseudogene         | 9606 | 12:760435 | 2 |
| ENST00000513797 | NIM1K-004    | NIM1 serine/threonine protein kinase                                                                | processed_transcript         | 9606 | 5:4319223 | 2 |
| ENST00000371527 | NKRF-001     | NFKB repressing factor                                                                              | protein_coding               | 9606 | X:1195883 | 2 |
| ENST00000586379 | NLRP7-004    | NLR family, pyrin domain containing 7                                                               | nonsense_mediated_decay      | 9606 | 19:549236 | 2 |
| ENST00000444498 | NME4-012     | NME/NM23 nucleoside diphosphate kinase 4                                                            | nonsense_mediated_decay      | 9606 | 16:397200 | 1 |
| ENST00000505779 | NMNAT3-011   | nicotinamide nucleotide adenyltransferase 3                                                         | processed_transcript         | 9606 | 3:1396343 | 2 |
| ENST00000524712 | NOD2-008     | nucleotide-binding oligomerization domain containing 2                                              | nonsense_mediated_decay      | 9606 | 16:507121 | 2 |
| ENST00000535384 | NOL4-006     | nucleolar protein 4                                                                                 | protein_coding               | 9606 | 18:338522 | 2 |
| ENST00000601015 | NOSIP-007    | nitric oxide synthase interacting protein                                                           | non_stop_decay               | 9606 | 19:495557 | 2 |
| ENST00000378169 | NPHP4-011    | nephronophthisis 4                                                                                  | nonsense_mediated_decay      | 9606 | 1:5863265 | 2 |
| ENST00000542133 | NPIP4-006    | nuclear pore complex interacting protein family, member B4                                          | nonsense_mediated_decay      | 9606 | 16:218376 | 2 |
| ENST00000541674 | NPIP4-017    | nuclear pore complex interacting protein family, member B4                                          | protein_coding               | 9606 | 16:218572 | 2 |
| ENST00000536620 | NPIP5-006    | nuclear pore complex interacting protein family, member B5                                          | protein_coding               | 9606 | 16:225130 | 2 |
| ENST00000460690 | NPL-006      | N-acetylneuraminidase pyruvate lyase (dihydrodipicolinate synthase)                                 | processed_transcript         | 9606 | 1:1827894 | 2 |
| ENST00000471010 | NPL-007      | N-acetylneuraminidase pyruvate lyase (dihydrodipicolinate synthase)                                 | processed_transcript         | 9606 | 1:1827922 | 2 |
| ENST00000507141 | NPR3-005     | natriuretic peptide receptor 3                                                                      | protein_coding               | 9606 | 5:3271233 | 3 |
| ENST00000547206 | NR4A1-009    | nuclear receptor subfamily 4, group A, member 1                                                     | processed_transcript         | 9606 | 12:520438 | 2 |
| ENST00000243050 | NR4A1-201    | nuclear receptor subfamily 4, group A, member 1                                                     | protein_coding               | 9606 | 12:520514 | 2 |
| ENST00000429376 | NR4A2-008    | nuclear receptor subfamily 4, group A, member 2                                                     | protein_coding               | 9606 | 2:1563257 | 1 |
| ENST00000622833 | NTAN1-201    | N-terminal asparagine amidase                                                                       | protein_coding               | 9606 | 16:150378 | 2 |
| ENST00000498764 | NTM-016      | neurotrophin                                                                                        | processed_transcript         | 9606 | 11:131910 | 1 |
| ENST00000596844 | NTN5-003     | netrin 5                                                                                            | protein_coding               | 9606 | 19:486619 | 1 |
| ENST00000480907 | NUB1-010     | negative regulator of ubiquitin-like proteins 1                                                     | retained_intron              | 9606 | 7:1513513 | 3 |
| ENST00000301944 | NXNL1-001    | nucleoredoxin-like 1                                                                                | protein_coding               | 9606 | 19:174554 | 1 |
| ENST00000539878 | NXPE1-006    | neurexophilin and PC-esterase domain family, member 1                                               | protein_coding               | 9606 | 11:114530 | 2 |
| ENST00000366707 | OBSCN-011    | obscurin, cytoskeletal calmodulin and titin-interacting RhoGEF                                      | protein_coding               | 9606 | 1:2282081 | 1 |
| ENST00000570156 | OBSCN-202    | obscurin, cytoskeletal calmodulin and titin-interacting RhoGEF                                      | protein_coding               | 9606 | 1:2282081 | 1 |
| ENST00000487015 | OFCC1-002    | orofacial cleft 1 candidate 1                                                                       | nonsense_mediated_decay      | 9606 | 6:9705425 | 1 |
| ENST00000469421 | OFCC1-022    | orofacial cleft 1 candidate 1                                                                       | processed_transcript         | 9606 | 6:9596110 | 2 |
| ENST00000450048 | OGFR-004     | opioid growth factor receptor                                                                       | protein_coding               | 9606 | 20:628027 | 2 |
| ENST00000303532 | OR10G3-001   | olfactory receptor, family 10, subfamily G, member 3                                                | protein_coding               | 9606 | 14:215698 | 1 |
| ENST00000552598 | OR11J2P-001  | olfactory receptor, family 11, subfamily J, member 2 pseudogene                                     | transcribed_unprocessed_pseu | 9606 | 15:209606 | 1 |
| ENST00000373686 | OR1L1-201    | olfactory receptor, family 1, subfamily L, member 1                                                 | protein_coding               | 9606 | 9:1226615 | 2 |
| ENST00000408898 | OR2A25-001   | olfactory receptor, family 2, subfamily A, member 25                                                | protein_coding               | 9606 | 7:1440741 | 1 |
| ENST00000432841 | OR2B8P-001   | olfactory receptor, family 2, subfamily B, member 8 pseudogene                                      | unprocessed_pseudogene       | 9606 | 6:2805322 | 1 |
| ENST00000396792 | OR2H1-007    | olfactory receptor, family 2, subfamily H, member 1                                                 | protein_coding               | 9606 | 6:2946144 | 1 |
| ENST00000318021 | OR2T33-001   | olfactory receptor, family 2, subfamily T, member 33                                                | protein_coding               | 9606 | 1:2482728 | 1 |
| ENST00000319968 | OR2T8-001    | olfactory receptor, family 2, subfamily T, member 8                                                 | protein_coding               | 9606 | 1:2479210 | 1 |
| ENST00000529557 | OR4A11P-001  | olfactory receptor, family 4, subfamily A, member 11 pseudogene                                     | unprocessed_pseudogene       | 9606 | 11:553185 | 1 |
| ENST00000608504 | OR51C1P-001  | olfactory receptor, family 51, subfamily C, member 1 pseudogene                                     | unprocessed_pseudogene       | 9606 | 11:469076 | 1 |
| ENST00000452394 | OR52E7P-001  | olfactory receptor, family 52, subfamily E, member 7 pseudogene                                     | unprocessed_pseudogene       | 9606 | 11:587396 | 1 |
| ENST00000414298 | OR52M2P-001  | olfactory receptor, family 52, subfamily M, member 2 pseudogene                                     | unprocessed_pseudogene       | 9606 | 11:451496 | 1 |
| ENST00000616746 | OR52Q1P-001  | olfactory receptor, family 52, subfamily Q, member 1 pseudogene                                     | unprocessed_pseudogene       | 9606 | 11:590376 | 3 |
| ENST00000408922 | OR6B1-001    | olfactory receptor, family 6, subfamily B, member 1                                                 | protein_coding               | 9606 | 7:1440039 | 1 |
| ENST00000402971 | OR6B2-001    | olfactory receptor, family 6, subfamily B, member 2                                                 | protein_coding               | 9606 | 2:2400289 | 1 |
| ENST00000368145 | OR6K3-001    | olfactory receptor, family 6, subfamily K, member 3                                                 | protein_coding               | 9606 | 1:1587171 | 2 |
| ENST00000531567 | OR6M3P-001   | olfactory receptor, family 6, subfamily M, member 3 pseudogene                                      | unprocessed_pseudogene       | 9606 | 11:123861 | 1 |
| ENST00000609216 | OR6R2P-001   | olfactory receptor, family 6, subfamily R, member 2 pseudogene                                      | unprocessed_pseudogene       | 9606 | 8:2179746 | 2 |
| ENST00000321252 | OR6T1-001    | olfactory receptor, family 6, subfamily T, member 1                                                 | protein_coding               | 9606 | 11:123942 | 2 |
| ENST00000327930 | OR6X1-001    | olfactory receptor, family 6, subfamily X, member 1                                                 | protein_coding               | 9606 | 11:123753 | 2 |
| ENST00000248072 | OR7C2-001    | olfactory receptor, family 7, subfamily C, member 2                                                 | protein_coding               | 9606 | 19:149414 | 1 |
| ENST00000412208 | OR7E155P-001 | olfactory receptor, family 7, subfamily E, member 155 pseudogene                                    | unprocessed_pseudogene       | 9606 | 13:414398 | 1 |
| ENST00000533484 | OR7E15P-001  | olfactory receptor, family 7, subfamily E, member 15 pseudogene                                     | unprocessed_pseudogene       | 9606 | 8:1269630 | 1 |
| ENST00000437705 | OR7E33P-001  | olfactory receptor, family 7, subfamily E, member 33 pseudogene                                     | unprocessed_pseudogene       | 9606 | 13:679109 | 1 |
| ENST00000418098 | OR7E53P-001  | olfactory receptor, family 7, subfamily E, member 53 pseudogene                                     | unprocessed_pseudogene       | 9606 | 3:1257342 | 2 |
| ENST00000305456 | OR7G2-001    | olfactory receptor, family 7, subfamily G, member 2                                                 | protein_coding               | 9606 | 19:910226 | 1 |
| ENST00000306842 | OR8B12-001   | olfactory receptor, family 8, subfamily B, member 12                                                | protein_coding               | 9606 | 11:124542 | 1 |
| ENST00000375013 | OR8B2-001    | olfactory receptor, family 8, subfamily B, member 2                                                 | protein_coding               | 9606 | 11:124382 | 1 |
| ENST00000624268 | OR8B4-201    | olfactory receptor, family 8, subfamily B, member 4                                                 | protein_coding               | 9606 | 11:124423 | 1 |
| ENST00000533932 | OR8B5P-001   | olfactory receptor, family 8, subfamily B, member 5 pseudogene                                      | unprocessed_pseudogene       | 9606 | 11:124357 | 1 |
| ENST00000525146 | OR8B6P-001   | olfactory receptor, family 8, subfamily B, member 6 pseudogene                                      | unprocessed_pseudogene       | 9606 | 11:124338 | 1 |
| ENST00000482472 | OR9A3P-002   | olfactory receptor, family 9, subfamily A, member 3 pseudogene                                      | processed_transcript         | 9606 | 7:1418631 | 1 |
| ENST00000580140 | OSBPL7-002   | oxysterol binding protein-like 7                                                                    | retained_intron              | 9606 | 17:478152 | 1 |
| ENST00000286149 | OTOA-003     | otoancorin                                                                                          | protein_coding               | 9606 | 16:216785 | 1 |
| ENST00000319460 | OTOS-201     | otospiralin                                                                                         | protein_coding               | 9606 | 2:2401390 | 2 |
| ENST00000545434 | P2RX7-013    | purinergic receptor P2X, ligand-gated ion channel, 7                                                | nonsense_mediated_decay      | 9606 | 12:121132 | 2 |
| ENST00000468596 | P2RY12-003   | purinergic receptor P2Y, G-protein coupled, 12                                                      | retained_intron              | 9606 | 3:1513381 | 1 |
| ENST00000427714 | P4HA3-004    | prolyl 4-hydroxylase, alpha polypeptide III                                                         | protein_coding               | 9606 | 11:742666 | 2 |
| ENST00000519596 | PABPC1-013   | poly(A) binding protein, cytoplasmic 1                                                              | processed_transcript         | 9606 | 8:1007066 | 1 |
| ENST00000513861 | PACRGL-026   | PARK2 co-regulated-like                                                                             | protein_coding               | 9606 | 4:2070045 | 4 |
| ENST00000619888 | PAMR1-001    | peptidase domain containing associated with muscle regeneration 1                                   | protein_coding               | 9606 | 11:354318 | 1 |
| ENST00000527605 | PAMR1-005    | peptidase domain containing associated with muscle regeneration 1                                   | protein_coding               | 9606 | 11:354324 | 2 |
| ENST00000428308 | PAPD4-201    | PAP associated domain containing 4                                                                  | protein_coding               | 9606 | 5:7961248 | 2 |
| ENST00000483254 | PAPPA-003    | pregnancy-associated plasma protein A, pappalysin 1                                                 | processed_transcript         | 9606 | 9:1163731 | 2 |

|                 |                  |                                                                                                              |                         |      |             |
|-----------------|------------------|--------------------------------------------------------------------------------------------------------------|-------------------------|------|-------------|
| ENST00000479836 | PAPPA2-005       | pappalysin 2                                                                                                 | processed_transcript    | 9606 | 1:1767914 2 |
| ENST00000463384 | PARD6G-002       | par-6 family cell polarity regulator gamma                                                                   | protein_coding          | 9606 | 18:801828 1 |
| ENST00000338468 | PARK2-003        | parkin RBR E3 ubiquitin protein ligase                                                                       | protein_coding          | 9606 | 6:1613500 2 |
| ENST00000510013 | PCBD2-004        | pterin-4 alpha-carbinolamine dehydratase/dimerization cofactor of hepatocyte nuclear factor 1 alpha (TCF1) 2 | processed_transcript    | 9606 | 5:1349088 2 |
| ENST00000465077 | PCBP3-006        | poly(rC) binding protein 3                                                                                   | processed_transcript    | 9606 | 21:456436 1 |
| ENST00000361724 | PCDH11X-004      | protocadherin 11 X-linked                                                                                    | retained_intron         | 9606 | X:9183466 1 |
| ENST00000614895 | PCDH15-205       | protocadherin-related 15                                                                                     | protein_coding          | 9606 | 10:538027 2 |
| ENST00000620262 | PCDH18-008       | protocadherin 18                                                                                             | processed_transcript    | 9606 | 4:1375215 1 |
| ENST00000530304 | PCF11-002        | PCF11 cleavage and polyadenylation factor subunit                                                            | protein_coding          | 9606 | 11:831571 1 |
| ENST00000530660 | PCF11-003        | PCF11 cleavage and polyadenylation factor subunit                                                            | protein_coding          | 9606 | 11:831571 1 |
| ENST00000595406 | PCGF7P-001       | polycomb group ring finger 7 pseudogene                                                                      | processed_pseudogene    | 9606 | 19:221379 2 |
| ENST00000426442 | PCLO-004         | piccolo presynaptic cytomatrix protein                                                                       | processed_transcript    | 9606 | 7:8282209 6 |
| ENST00000480473 | PCOLCE2-006      | procollagen C-endopeptidase enhancer 2                                                                       | nonsense_mediated_decay | 9606 | 3:1428209 2 |
| ENST00000588195 | PCSK4-006        | proprotein convertase subtilisin/kexin type 4                                                                | retained_intron         | 9606 | 19:148241 1 |
| ENST00000465122 | PDCD6IP-012      | programmed cell death 6 interacting protein                                                                  | retained_intron         | 9606 | 3:3384409 2 |
| ENST00000392251 | PDCL3P7-001      | phosducin-like 3 pseudogene 7                                                                                | processed_pseudogene    | 9606 | 12:662759 1 |
| ENST00000358450 | PDE11A-002       | phosphodiesterase 11A                                                                                        | protein_coding          | 9606 | 2:1776280 1 |
| ENST00000478646 | PDE11A-011       | phosphodiesterase 11A                                                                                        | retained_intron         | 9606 | 2:1776291 1 |
| ENST00000611899 | PDE1B-009        | phosphodiesterase 1B, calmodulin-dependent                                                                   | nonsense_mediated_decay | 9606 | 12:545496 1 |
| ENST00000396182 | PDE1C-007        | phosphodiesterase 1C, calmodulin-dependent 70kDa                                                             | protein_coding          | 9606 | 7:3179020 1 |
| ENST00000539367 | PDE2A-002        | phosphodiesterase 2A, cGMP-stimulated                                                                        | nonsense_mediated_decay | 9606 | 11:725761 1 |
| ENST00000593594 | PDE4C-012        | phosphodiesterase 4C, cAMP-specific                                                                          | nonsense_mediated_decay | 9606 | 19:182202 1 |
| ENST00000295266 | PDHA2-001        | pyruvate dehydrogenase (lipoamide) alpha 2                                                                   | protein_coding          | 9606 | 4:9584001 1 |
| ENST00000397760 | PDLM2-020        | PDZ and LIM domain 2 (mystique)                                                                              | protein_coding          | 9606 | 8:2257913 2 |
| ENST00000505886 | PDLM3-006        | PDZ and LIM domain 3                                                                                         | nonsense_mediated_decay | 9606 | 4:1855045 2 |
| ENST00000513143 | PDPN-007         | podoplanin                                                                                                   | protein_coding          | 9606 | 1:1358427 1 |
| ENST00000451791 | PENK-001         | proenkephalin                                                                                                | protein_coding          | 9606 | 8:5644127 1 |
| ENST00000314922 | PENK-002         | proenkephalin                                                                                                | protein_coding          | 9606 | 8:5644095 1 |
| ENST00000525229 | PEX16-008        | peroxisomal biogenesis factor 16                                                                             | nonsense_mediated_decay | 9606 | 11:459154 2 |
| ENST00000551018 | PFDN5-001        | prefoldin subunit 5                                                                                          | protein_coding          | 9606 | 12:532952 1 |
| ENST00000312352 | PFKM-201         | phosphofructokinase, muscle                                                                                  | protein_coding          | 9606 | 12:481226 2 |
| ENST00000378149 | PGA4-001         | pepsinogen 4, group I (pepsinogen A)                                                                         | protein_coding          | 9606 | 11:612222 1 |
| ENST00000496758 | PGM5-005         | phosphoglucomutase 5                                                                                         | retained_intron         | 9606 | 9:6849682 2 |
| ENST00000421970 | PGM5P4-001       | phosphoglucomutase 5 pseudogene 4                                                                            | processed_pseudogene    | 9606 | 2:1135419 1 |
| ENST00000394276 | PGRMC2-002       | progesterone receptor membrane component 2                                                                   | protein_coding          | 9606 | 4:1282692 2 |
| ENST00000622263 | PHF20L1-202      | PHD finger protein 20-like 1                                                                                 | protein_coding          | 9606 | 8:1327753 2 |
| ENST00000322659 | PHF8-002         | PHD finger protein 8                                                                                         | protein_coding          | 9606 | X:5394325 1 |
| ENST00000524713 | PHLDB1-038       | pleckstrin homology-like domain, family B, member 1                                                          | processed_transcript    | 9606 | 11:118641 1 |
| ENST00000503902 | PHOSPHO1-006     | phosphatase, orphan 1                                                                                        | protein_coding          | 9606 | 17:492248 2 |
| ENST00000528398 | PICALM-003       | phosphatidylinositol binding clathrin assembly protein                                                       | protein_coding          | 9606 | 11:859588 1 |
| ENST00000356360 | PICALM-006       | phosphatidylinositol binding clathrin assembly protein                                                       | protein_coding          | 9606 | 11:859589 1 |
| ENST00000484512 | PIFO-002         | primary cilia formation                                                                                      | processed_transcript    | 9606 | 1:1113466 4 |
| ENST00000587942 | PIGN-017         | phosphatidylinositol glycan anchor biosynthesis, class N                                                     | retained_intron         | 9606 | 18:620453 4 |
| ENST00000464016 | PIK3R2-009       | phosphoinositide-3-kinase, regulatory subunit 2 (beta)                                                       | nonsense_mediated_decay | 9606 | 19:181862 4 |
| ENST00000540465 | PIP4K2C-003      | phosphatidylinositol-5-phosphate 4-kinase, type II, gamma                                                    | protein_coding          | 9606 | 12:575912 1 |
| ENST00000478500 | PIP5K1B-002      | phosphatidylinositol-4-phosphate 5-kinase, type I, beta                                                      | nonsense_mediated_decay | 9606 | 9:6874225 2 |
| ENST00000497234 | PIPKL1-001       | phosphatidylinositol-4-phosphate 5-kinase-like 1                                                             | processed_transcript    | 9606 | 9:1279252 1 |
| ENST00000454009 | PIWIL2-003       | piwi-like RNA-mediated gene silencing 2                                                                      | protein_coding          | 9606 | 8:2227556 1 |
| ENST00000337114 | PKD1L2-201       | polycystic kidney disease 1-like 2                                                                           | protein_coding          | 9606 | 16:811702 1 |
| ENST00000485301 | PKN3-003         | protein kinase N3                                                                                            | processed_transcript    | 9606 | 9:1287146 4 |
| ENST00000559662 | PKNOX2-014       | PBX/knotted 1 homeobox 2                                                                                     | processed_transcript    | 9606 | 11:125164 1 |
| ENST00000539875 | PLCZ1-004        | phospholipase C, zeta 1                                                                                      | protein_coding          | 9606 | 12:186831 1 |
| ENST00000544849 | PLCZ1-010        | phospholipase C, zeta 1                                                                                      | retained_intron         | 9606 | 12:187357 1 |
| ENST00000525581 | PLEKHA7-012      | pleckstrin homology domain containing, family A member 7                                                     | protein_coding          | 9606 | 11:167949 2 |
| ENST00000544532 | PLEKHB1-011      | pleckstrin homology domain containing, family B (evectins) member 1                                          | processed_transcript    | 9606 | 11:736476 2 |
| ENST00000409612 | PLEKHB2-004      | pleckstrin homology domain containing, family B (evectins) member 2                                          | protein_coding          | 9606 | 2:1311075 1 |
| ENST00000567897 | PLK1-007         | polo-like kinase 1                                                                                           | protein_coding          | 9606 | 16:236795 2 |
| ENST00000485046 | PLOD1-004        | procollagen-lysine, 2-oxoglutarate 5-dioxygenase 1                                                           | processed_transcript    | 9606 | 1:1193420 1 |
| ENST00000358133 | PLOD1-006        | procollagen-lysine, 2-oxoglutarate 5-dioxygenase 1                                                           | processed_transcript    | 9606 | 1:1193473 1 |
| ENST00000485980 | PLXNB3-004       | plexin B3                                                                                                    | processed_transcript    | 9606 | X:1537772 2 |
| ENST00000567697 | PMM2-007         | phosphomannomutase 2                                                                                         | retained_intron         | 9606 | 16:880756 2 |
| ENST00000412694 | PMS2P6-001       | postmeiotic segregation increased 2 pseudogene 6                                                             | unprocessed_pseudogene  | 9606 | 7:7531804 1 |
| ENST00000579578 | PNLIPRP2-005     | pancreatic lipase-related protein 2                                                                          | polymorphic_pseudogene  | 9606 | 10:116620 1 |
| ENST00000502826 | POC5-010         | POC5 centriolar protein                                                                                      | protein_coding          | 9606 | 5:7570261 2 |
| ENST00000518579 | POLB-016         | polymerase (DNA directed), beta                                                                              | protein_coding          | 9606 | 8:4235717 2 |
| ENST00000492605 | POLM-009         | polymerase (DNA directed), mu                                                                                | retained_intron         | 9606 | 7:4407571 1 |
| ENST00000621776 | POLQ-201         | polymerase (DNA directed), theta                                                                             | protein_coding          | 9606 | 3:1214314 2 |
| ENST00000531944 | POLR2G-003       | polymerase (RNA) II (DNA directed) polypeptide G                                                             | nonsense_mediated_decay | 9606 | 11:627616 2 |
| ENST00000361163 | POTEF-202        | POTE ankyrin domain family, member F                                                                         | protein_coding          | 9606 | 2:1300752 1 |
| ENST00000520104 | POU6F2-007       | POU class 6 homeobox 2                                                                                       | protein_coding          | 9606 | 7:3908505 2 |
| ENST00000507724 | PPAT-004         | phosphoribosyl pyrophosphate amidotransferase                                                                | nonsense_mediated_decay | 9606 | 4:5640307 4 |
| ENST00000545381 | PPFIBP1-004      | PTPRF interacting protein, binding protein 1 (liprin beta 1)                                                 | non_stop_decay          | 9606 | 12:275241 1 |
| ENST00000409361 | PPIL3-007        | peptidylprolyl isomerase (cyclophilin)-like 3                                                                | protein_coding          | 9606 | 2:2008712 2 |
| ENST00000409432 | PPM1B-004        | protein phosphatase, Mg2+/Mn2+ dependent, 1B                                                                 | protein_coding          | 9606 | 2:4416887 1 |
| ENST00000396737 | PPM1N-003        | protein phosphatase, Mg2+/Mn2+ dependent, 1N (putative)                                                      | protein_coding          | 9606 | 19:454972 1 |
| ENST00000376769 | PPP1R11-001      | protein phosphatase 1, regulatory (inhibitor) subunit 11                                                     | protein_coding          | 9606 | 6:3006720 2 |
| ENST00000495799 | PPP1R3F-003      | protein phosphatase 1, regulatory subunit 3F                                                                 | protein_coding          | 9606 | X:4926987 2 |
| ENST00000512984 | PPP2R2B-013      | protein phosphatase 2, regulatory subunit B, beta                                                            | protein_coding          | 9606 | 5:1465900 2 |
| ENST00000456642 | PPP6C-002        | protein phosphatase 6, catalytic subunit                                                                     | protein_coding          | 9606 | 9:1251539 2 |
| ENST00000443648 | PQBP1-011        | polyglutamine binding protein 1                                                                              | protein_coding          | 9606 | X:4889826 2 |
| ENST00000357367 | PRAMEF8-001      | PRAME family member 8                                                                                        | protein_coding          | 9606 | 1:1328103 1 |
| ENST00000381842 | PRB3-201         | proline-rich protein BstNI subfamily 3                                                                       | protein_coding          | 9606 | 12:112659 1 |
| ENST00000489365 | PRDM1-005        | PR domain containing 1, with ZNF domain                                                                      | retained_intron         | 9606 | 6:1060883 2 |
| ENST00000463591 | PRDM16-004       | PR domain containing 16                                                                                      | protein_coding          | 9606 | 1:3244132 1 |
| ENST00000509375 | PRDM8-006        | PR domain containing 8                                                                                       | processed_transcript    | 9606 | 4:8018388 2 |
| ENST00000334482 | PRDX2-002        | peroxiredoxin 2                                                                                              | protein_coding          | 9606 | 19:127968 1 |
| ENST00000260648 | PREPL-003        | prolyl endopeptidase-like                                                                                    | protein_coding          | 9606 | 2:4432082 2 |
| ENST00000445766 | PRICKLE1-005     | prickle homolog 1 (Drosophila)                                                                               | protein_coding          | 9606 | 12:424583 6 |
| ENST00000484703 | PRICKLE2-AS2-001 | PRICKLE2 antisense RNA 2                                                                                     | antisense               | 9606 | 3:6410347 1 |
| ENST00000614014 | PRICKLE3-008     | prickle homolog 3 (Drosophila)                                                                               | retained_intron         | 9606 | X:4917713 2 |
| ENST00000376317 | PRICKLE3-009     | prickle homolog 3 (Drosophila)                                                                               | protein_coding          | 9606 | X:4917980 1 |
| ENST00000430040 | PRKAR1B-008      | protein kinase, cAMP-dependent, regulatory, type I, beta                                                     | protein_coding          | 9606 | 7:579256:4  |
| ENST00000545647 | PRKG2-202        | protein kinase, cGMP-dependent, type II                                                                      | protein_coding          | 9606 | 4:8108737 1 |

|                 |                 |                                                                                  |                         |      |             |
|-----------------|-----------------|----------------------------------------------------------------------------------|-------------------------|------|-------------|
| ENST00000469763 | PRKRIP1-008     | PRKR interacting protein 1 (IL11 inducible)                                      | processed_transcript    | 9606 | 7:1023638 1 |
| ENST00000418528 | PRNT-001        | prion protein (testis specific)                                                  | protein_coding          | 9606 | 20:473128 2 |
| ENST00000484434 | PROSER1-004     | proline and serine rich 1                                                        | processed_transcript    | 9606 | 13:390101 1 |
| ENST00000413560 | PROX1-AS1-002   | PROX1 antisense RNA 1                                                            | antisense               | 9606 | 1:2138407 2 |
| ENST00000601907 | PROX1-AS1-011   | PROX1 antisense RNA 1                                                            | antisense               | 9606 | 1:2138325 2 |
| ENST00000605538 | PRR13P7-001     | proline rich 13 pseudogene 7                                                     | processed_pseudogene    | 9606 | 8:9190973 1 |
| ENST00000571654 | PRR14-016       | proline rich 14                                                                  | processed_transcript    | 9606 | 16:306548 2 |
| ENST00000452758 | PRSS37-003      | protease, serine, 37                                                             | nonsense_mediated_decay | 9606 | 7:1418363 1 |
| ENST00000559842 | PRTG-003        | protogenin                                                                       | retained_intron         | 9606 | 15:556780 2 |
| ENST00000466500 | PSAT1P4-001     | phosphoserine aminotransferase 1 pseudogene 4                                    | processed_pseudogene    | 9606 | 3:1666911 2 |
| ENST00000286485 | PSD3-003        | pleckstrin and Sec7 domain containing 3                                          | protein_coding          | 9606 | 8:1853071 1 |
| ENST00000403486 | PSG11-004       | pregnancy specific beta-1-glycoprotein 11                                        | protein_coding          | 9606 | 19:430076 1 |
| ENST00000446844 | PSG7-003        | pregnancy specific beta-1-glycoprotein 7 (gene/pseudogene)                       | protein_coding          | 9606 | 19:429248 1 |
| ENST00000596730 | PSG9-006        | pregnancy specific beta-1-glycoprotein 9                                         | protein_coding          | 9606 | 19:432571 1 |
| ENST00000477897 | PSMA5-005       | proteasome (prosome, macropain) subunit, alpha type, 5                           | processed_transcript    | 9606 | 1:1094118 2 |
| ENST00000556349 | PSMB7P1-001     | PSMB7 pseudogene 1                                                               | unitary_pseudogene      | 9606 | 14:201492 2 |
| ENST00000532097 | PSMD13-001      | proteasome (prosome, macropain) 26S subunit, non-ATPase, 13                      | protein_coding          | 9606 | 11:236546 1 |
| ENST00000259881 | PSORS1C1-001    | psoriasis susceptibility 1 candidate 1                                           | protein_coding          | 9606 | 6:3111483 1 |
| ENST00000459765 | PSRC1-008       | proline/serine-rich coiled-coil 1                                                | retained_intron         | 9606 | 1:1092814 1 |
| ENST00000379595 | PSTPIP1-002     | proline-serine-threonine phosphatase interacting protein 1                       | protein_coding          | 9606 | 15:769951 2 |
| ENST00000558407 | PSTPIP1-012     | proline-serine-threonine phosphatase interacting protein 1                       | protein_coding          | 9606 | 15:769933 2 |
| ENST00000559856 | PSTPIP1-015     | proline-serine-threonine phosphatase interacting protein 1                       | protein_coding          | 9606 | 15:770184 2 |
| ENST00000455399 | PTCHD1-AS-001   | PTCHD1 antisense RNA (head to head)                                              | lincRNA                 | 9606 | X:2238931 1 |
| ENST00000356595 | PTGER3-004      | prostaglandin E receptor 3 (subtype EP3)                                         | protein_coding          | 9606 | 1:7095243 1 |
| ENST00000471863 | PTK7-003        | protein tyrosine kinase 7                                                        | protein_coding          | 9606 | 6:4307633 2 |
| ENST00000568793 | PTPLAD1-005     | protein tyrosine phosphatase-like A domain containing 1                          | protein_coding          | 9606 | 15:655305 2 |
| ENST00000359785 | PTPN22-001      | protein tyrosine phosphatase, non-receptor type 22 (lymphoid)                    | protein_coding          | 9606 | 1:1138138 1 |
| ENST00000412145 | PTPN3-202       | protein tyrosine phosphatase, non-receptor type 3                                | protein_coding          | 9606 | 9:1093756 1 |
| ENST00000615445 | PTPRJ-202       | protein tyrosine phosphatase, receptor type, J                                   | protein_coding          | 9606 | 11:479805 2 |
| ENST00000412847 | PTPRN-012       | protein tyrosine phosphatase, receptor type, N                                   | protein_coding          | 9606 | 2:2193024 1 |
| ENST00000549107 | PTPRR-010       | protein tyrosine phosphatase, receptor type, R                                   | processed_transcript    | 9606 | 12:706391 2 |
| ENST00000517838 | PVT1-015        | Pvt1 oncogene (non-protein coding)                                               | lincRNA                 | 9606 | 8:1278908 4 |
| ENST00000392252 | PYHIN1-004      | pyrin and HIN domain family, member 1                                            | protein_coding          | 9606 | 1:1589315 1 |
| ENST00000494941 | PYROXD2-004     | pyridine nucleotide-disulphide oxidoreductase domain 2                           | processed_transcript    | 9606 | 10:984139 1 |
| ENST00000527788 | QSER1-002       | glutamine and serine rich 1                                                      | protein_coding          | 9606 | 11:329259 2 |
| ENST00000518454 | R3HCC1-002      | R3H domain and coiled-coil containing 1                                          | protein_coding          | 9606 | 8:2328790 2 |
| ENST00000592334 | RAB27B-002      | RAB27B, member RAS oncogene family                                               | protein_coding          | 9606 | 18:548843 2 |
| ENST00000357573 | RABEP2-006      | rabaptin, RAB GTPase binding effector protein 2                                  | protein_coding          | 9606 | 16:289044 1 |
| ENST00000316856 | RAD23A-001      | RAD23 homolog A (S. cerevisiae)                                                  | protein_coding          | 9606 | 19:129458 2 |
| ENST00000523727 | RANBP17-020     | RAN binding protein 17                                                           | retained_intron         | 9606 | 5:1708818 2 |
| ENST00000475125 | RARA-005        | retinoic acid receptor, alpha                                                    | protein_coding          | 9606 | 17:403452 2 |
| ENST00000416035 | RBBP7-004       | retinoblastoma binding protein 7                                                 | protein_coding          | 9606 | X:1685204 4 |
| ENST00000399725 | RBBP8-002       | retinoblastoma binding protein 8                                                 | protein_coding          | 9606 | 18:229338 1 |
| ENST00000620507 | RBFOX1-202      | RNA binding protein, fox-1 homolog (C. elegans) 1                                | protein_coding          | 9606 | 16:733275 1 |
| ENST00000513909 | RCHY1-013       | ring finger and CHY zinc finger domain containing 1, E3 ubiquitin protein ligase | nonsense_mediated_decay | 9606 | 4:7548260 2 |
| ENST00000400413 | RCHN1P1-001     | reticulocalbin 1, EF-hand calcium binding domain pseudogene 1                    | processed_pseudogene    | 9606 | 6:8712169 2 |
| ENST00000587721 | RDH13-015       | retinol dehydrogenase 13 (all-trans/9-cis)                                       | nonsense_mediated_decay | 9606 | 19:550474 2 |
| ENST00000457282 | RENBP-002       | renin binding protein                                                            | nonsense_mediated_decay | 9606 | X:1539352 3 |
| ENST00000475904 | RENBP-010       | renin binding protein                                                            | retained_intron         | 9606 | X:1539436 1 |
| ENST00000479668 | REPIN1-001      | replication initiator 1                                                          | protein_coding          | 9606 | 7:1503682 2 |
| ENST00000473391 | REPIN1-005      | replication initiator 1                                                          | retained_intron         | 9606 | 7:1503688 1 |
| ENST00000454447 | RFTN2-002       | ratflin family member 2                                                          | protein_coding          | 9606 | 2:1975720 2 |
| ENST00000302303 | RFX3-201        | regulatory factor X, 3 (influences HLA class II expression)                      | protein_coding          | 9606 | 9:3270930 2 |
| ENST00000357881 | RFX4-003        | regulatory factor X, 4 (influences HLA class II expression)                      | protein_coding          | 9606 | 12:106601 1 |
| ENST00000303331 | RGPD6-012       | RANBP2-like and GRIP domain containing 6                                         | protein_coding          | 9606 | 2:1105384 2 |
| ENST00000493165 | RG519-002       | regulator of G-protein signaling 19                                              | processed_transcript    | 9606 | 20:640744 1 |
| ENST00000519725 | RG522-017       | regulator of G-protein signaling 22                                              | nonsense_mediated_decay | 9606 | 8:1000084 2 |
| ENST00000511121 | RHOH-014        | ras homolog family member H                                                      | protein_coding          | 9606 | 4:4020034 1 |
| ENST00000581094 | RHOT1-006       | ras homolog family member T1                                                     | protein_coding          | 9606 | 17:321426 1 |
| ENST00000512598 | RIMS2-010       | regulating synaptic membrane exocytosis 2                                        | retained_intron         | 9606 | 8:1039155 2 |
| ENST00000548886 | RMTS-002        | rhabdomyosarcoma 2 associated transcript (non-protein coding)                    | lincRNA                 | 9606 | 12:974924 1 |
| ENST00000363008 | RN7SKP149-201   | RNA, 7SK small nuclear pseudogene 149                                            | misc_RNA                | 9606 | X:1431972 2 |
| ENST00000410170 | RN7SKP232-201   | RNA, 7SK small nuclear pseudogene 232                                            | misc_RNA                | 9606 | 5:1517042 1 |
| ENST00000411094 | RN7SKP247-201   | RNA, 7SK small nuclear pseudogene 247                                            | misc_RNA                | 9606 | 18:125178 2 |
| ENST00000410685 | RN7SKP254-201   | RNA, 7SK small nuclear pseudogene 254                                            | misc_RNA                | 9606 | 15:964865 2 |
| ENST00000410520 | RN7SKP59-201    | RNA, 7SK small nuclear pseudogene 59                                             | misc_RNA                | 9606 | 9:7816546 1 |
| ENST00000487345 | RN7SL147P-201   | RNA, 7SL, cytoplasmic 147, pseudogene                                            | misc_RNA                | 9606 | 3:1195278 2 |
| ENST00000465197 | RN7SL149P-201   | RNA, 7SL, cytoplasmic 149, pseudogene                                            | misc_RNA                | 9606 | 4:184005 2  |
| ENST00000490174 | RN7SL205P-201   | RNA, 7SL, cytoplasmic 205, pseudogene                                            | misc_RNA                | 9606 | 4:1317202 2 |
| ENST00000485107 | RN7SL267P-201   | RNA, 7SL, cytoplasmic 267, pseudogene                                            | misc_RNA                | 9606 | 2:1823142 2 |
| ENST00000481765 | RN7SL293P-201   | RNA, 7SL, cytoplasmic 293, pseudogene                                            | misc_RNA                | 9606 | 8:1137939 2 |
| ENST00000466002 | RN7SL352P-201   | RNA, 7SL, cytoplasmic 352, pseudogene                                            | misc_RNA                | 9606 | 6:1507322 1 |
| ENST00000584418 | RN7SL435P-201   | RNA, 7SL, cytoplasmic 435, pseudogene                                            | misc_RNA                | 9606 | 11:592910 1 |
| ENST00000476341 | RN7SL497P-201   | RNA, 7SL, cytoplasmic 497, pseudogene                                            | misc_RNA                | 9606 | 15:411919 2 |
| ENST00000464472 | RN7SL508P-201   | RNA, 7SL, cytoplasmic 508, pseudogene                                            | misc_RNA                | 9606 | 12:118993 2 |
| ENST00000467147 | RN7SL542P-201   | RNA, 7SL, cytoplasmic 542, pseudogene                                            | misc_RNA                | 9606 | 7:2121553 2 |
| ENST00000480810 | RN7SL551P-201   | RNA, 7SL, cytoplasmic 551, pseudogene                                            | misc_RNA                | 9606 | 18:742275 1 |
| ENST00000493933 | RN7SL668P-201   | RNA, 7SL, cytoplasmic 668, pseudogene                                            | misc_RNA                | 9606 | 1:2349041 2 |
| ENST00000460697 | RN7SL72P-201    | RNA, 7SL, cytoplasmic 72, pseudogene                                             | misc_RNA                | 9606 | 7:1484383 2 |
| ENST00000365061 | RNA5SP172-201   | RNA, 5S ribosomal pseudogene 172                                                 | rRNA                    | 9606 | 4:1774571 2 |
| ENST00000516938 | RNA5SP364-201   | RNA, 5S ribosomal pseudogene 364                                                 | rRNA                    | 9606 | 12:880517 2 |
| ENST00000363646 | RNA5SP378-201   | RNA, 5S ribosomal pseudogene 378                                                 | rRNA                    | 9606 | 12:131801 1 |
| ENST00000364599 | RNA5SP379-201   | RNA, 5S ribosomal pseudogene 379                                                 | rRNA                    | 9606 | 12:132723 2 |
| ENST00000591394 | RNF126-002      | ring finger protein 126                                                          | retained_intron         | 9606 | 19:651385 1 |
| ENST00000474394 | RNF220-017      | ring finger protein 220                                                          | processed_transcript    | 9606 | 1:4463829 1 |
| ENST00000399398 | RNF222-001      | ring finger protein 222                                                          | protein_coding          | 9606 | 17:839070 2 |
| ENST00000525701 | RNH1-002        | ribonuclease/angiogenin inhibitor 1                                              | nonsense_mediated_decay | 9606 | 11:494523 2 |
| ENST00000354420 | RNH1-004        | ribonuclease/angiogenin inhibitor 1                                              | protein_coding          | 9606 | 11:494552 2 |
| ENST00000543302 | RNMT-003        | RNA (guanine-7-) methyltransferase                                               | protein_coding          | 9606 | 18:137266 1 |
| ENST00000410144 | RNU2-3P-201     | RNA, U2 small nuclear 3, pseudogene                                              | snRNA                   | 9606 | 15:957458 3 |
| ENST00000410697 | RNU2-42P-201    | RNA, U2 small nuclear 42, pseudogene                                             | snRNA                   | 9606 | 10:125890 1 |
| ENST00000410494 | RNU2-50P-201    | RNA, U2 small nuclear 50, pseudogene                                             | snRNA                   | 9606 | 9:3428252 1 |
| ENST00000517272 | RNU4ATAC17P-201 | RNA, U4atc small nuclear 17, pseudogene                                          | snRNA                   | 9606 | 3:8364529 1 |



|                 |                     |                                                                |                              |      |             |
|-----------------|---------------------|----------------------------------------------------------------|------------------------------|------|-------------|
| ENST00000516802 | RNU6-1121P-201      | RNA, U6 small nuclear 1121, pseudogene                         | snRNA                        | 9606 | 10:114969 2 |
| ENST00000363795 | RNU6-1188P-201      | RNA, U6 small nuclear 1188, pseudogene                         | snRNA                        | 9606 | 12:116082 3 |
| ENST00000383958 | RNU6-1189P-201      | RNA, U6 small nuclear 1189, pseudogene                         | snRNA                        | 9606 | X:4708750 2 |
| ENST00000384343 | RNU6-1207P-201      | RNA, U6 small nuclear 1207, pseudogene                         | snRNA                        | 9606 | 10:451887 1 |
| ENST00000459588 | RNU6-1208P-201      | RNA, U6 small nuclear 1208, pseudogene                         | snRNA                        | 9606 | 1:2477787 1 |
| ENST00000517185 | RNU6-1231P-201      | RNA, U6 small nuclear 1231, pseudogene                         | snRNA                        | 9606 | 10:102803 2 |
| ENST00000364841 | RNU6-1303P-201      | RNA, U6 small nuclear 1303, pseudogene                         | snRNA                        | 9606 | 9:7763520 1 |
| ENST00000517187 | RNU6-1315P-201      | RNA, U6 small nuclear 1315, pseudogene                         | snRNA                        | 9606 | 12:295424 2 |
| ENST00000384355 | RNU6-22P-201        | RNA, U6 small nuclear 22, pseudogene                           | snRNA                        | 9606 | 16:691756 2 |
| ENST00000517078 | RNU6-430P-201       | RNA, U6 small nuclear 430, pseudogene                          | snRNA                        | 9606 | 16:894433 2 |
| ENST00000391068 | RNU6-482P-201       | RNA, U6 small nuclear 482, pseudogene                          | snRNA                        | 9606 | 5:1127783 1 |
| ENST00000362356 | RNU6-50P-201        | RNA, U6 small nuclear 50, pseudogene                           | snRNA                        | 9606 | X:4651776 2 |
| ENST00000363425 | RNU6-527P-201       | RNA, U6 small nuclear 527, pseudogene                          | snRNA                        | 9606 | 6:1066077 2 |
| ENST00000363354 | RNU6-626P-201       | RNA, U6 small nuclear 626, pseudogene                          | snRNA                        | 9606 | 6:5694573 1 |
| ENST00000516946 | RNU6-703P-201       | RNA, U6 small nuclear 703, pseudogene                          | snRNA                        | 9606 | 8:9804885 2 |
| ENST00000364837 | RNU6-818P-201       | RNA, U6 small nuclear 818, pseudogene                          | snRNA                        | 9606 | 4:8820170 1 |
| ENST00000364943 | RNU6-915P-201       | RNA, U6 small nuclear 915, pseudogene                          | snRNA                        | 9606 | 2:1956703 2 |
| ENST00000410432 | RNU6-96P-201        | RNA, U6 small nuclear 96, pseudogene                           | snRNA                        | 9606 | 7:6639519 2 |
| ENST00000459303 | RNU7-170P-201       | RNA, U7 small nuclear 170 pseudogene                           | snRNA                        | 9606 | 12:121908 2 |
| ENST00000363063 | RNY1P16-201         | RNA, Ro-associated Y1 pseudogene 16                            | misc_RNA                     | 9606 | 12:101719 3 |
| ENST00000401753 | ROCK2-006           | Rho-associated, coiled-coil containing protein kinase 2        | protein_coding               | 9606 | 2:1118333 2 |
| ENST00000413707 | RP11-100E13.3-001   |                                                                | processed_pseudogene         | 9606 | 1:2246611 1 |
| ENST00000524239 | RP11-101E19.4-001   |                                                                | processed_pseudogene         | 9606 | 8:4683757 1 |
| ENST00000549459 | RP11-1079J2.1-001   |                                                                | processed_pseudogene         | 9606 | 12:849395 2 |
| ENST00000414775 | RP11-107G24.3-001   |                                                                | unprocessed_pseudogene       | 9606 | 1:2470853 1 |
| ENST00000578367 | RP11-107K17.1-001   | long intergenic non-protein coding RNA 1543                    | lincRNA                      | 9606 | 18:264229 1 |
| ENST00000585536 | RP11-1094M14.10-001 |                                                                | lincRNA                      | 9606 | 17:355400 1 |
| ENST00000478593 | RP11-109G23.1-001   |                                                                | processed_pseudogene         | 9606 | 4:7876849 3 |
| ENST00000518580 | RP11-109J4.1-001    |                                                                | lincRNA                      | 9606 | 5:1609317 1 |
| ENST00000481228 | RP11-10G15.4-001    |                                                                | processed_pseudogene         | 9606 | 3:1213569 2 |
| ENST00000578881 | RP11-1109M24.5-001  |                                                                | lincRNA                      | 9606 | 17:222664 2 |
| ENST00000519983 | RP11-1114I9.1-001   |                                                                | lincRNA                      | 9606 | 8:7929771 2 |
| ENST00000538317 | RP11-114G22.1-003   |                                                                | lincRNA                      | 9606 | 12:228594 1 |
| ENST00000450613 | RP11-114J13.1-001   |                                                                | lincRNA                      | 9606 | 5:1260768 2 |
| ENST00000503691 | RP11-116A1.1-001    |                                                                | lincRNA                      | 9606 | 5:8958120 2 |
| ENST00000589510 | RP11-116O18.3-002   |                                                                | antisense                    | 9606 | 18:456693 1 |
| ENST00000503353 | RP11-119H12.3-001   |                                                                | processed_pseudogene         | 9606 | 4:1127970 1 |
| ENST00000504528 | RP11-119H12.4-001   |                                                                | processed_pseudogene         | 9606 | 4:1128263 1 |
| ENST00000511590 | RP11-119H12.6-001   |                                                                | antisense                    | 9606 | 4:1128802 3 |
| ENST00000618187 | RP11-120E5.1-001    |                                                                | processed_pseudogene         | 9606 | 9:6663575 2 |
| ENST00000447087 | RP11-121F2.9-001    |                                                                | unprocessed_pseudogene       | 9606 | 7:5718789 2 |
| ENST00000515699 | RP11-121G22.3-008   |                                                                | lincRNA                      | 9606 | 12:812791 6 |
| ENST00000485829 | RP11-123J14.1-001   |                                                                | processed_pseudogene         | 9606 | 4:7689103 2 |
| ENST00000465411 | RP11-124D2.1-001    |                                                                | processed_pseudogene         | 9606 | 14:232299 1 |
| ENST00000432774 | RP11-12D5.2-001     |                                                                | processed_pseudogene         | 9606 | X:2783217 1 |
| ENST00000624274 | RP11-133K1.8-001    |                                                                | TEC                          | 9606 | 15:402449 1 |
| ENST00000451200 | RP11-136C24.3-001   | Uncharacterized protein [ECO:0000313][Ensembl:ENSP00000477043] | processed_transcript         | 9606 | 3:4280944 2 |
| ENST00000555721 | RP11-140I24.1-001   |                                                                | lincRNA                      | 9606 | 16:733868 2 |
| ENST00000567049 | RP11-146F11.2-001   |                                                                | processed_pseudogene         | 9606 | 16:306269 2 |
| ENST00000487111 | RP11-147I3.1-003    |                                                                | processed_transcript         | 9606 | 11:749135 2 |
| ENST00000468671 | RP11-14K2.1-001     |                                                                | processed_pseudogene         | 9606 | 16:128811 2 |
| ENST00000533300 | RP11-159H10.3-002   |                                                                | antisense                    | 9606 | 8:6983415 4 |
| ENST00000589021 | RP11-15A1.7-001     |                                                                | antisense                    | 9606 | 19:439968 1 |
| ENST00000588492 | RP11-15B24.5-012    |                                                                | lincRNA                      | 9606 | 9:8227345 1 |
| ENST00000589973 | RP11-15B24.5-016    |                                                                | lincRNA                      | 9606 | 9:8249195 2 |
| ENST00000570227 | RP11-160C18.2-002   |                                                                | processed_transcript         | 9606 | 15:787336 2 |
| ENST00000556228 | RP11-163M18.1-003   |                                                                | antisense                    | 9606 | 14:445090 2 |
| ENST00000513415 | RP11-167P23.2-002   |                                                                | processed_transcript         | 9606 | X:5565472 2 |
| ENST00000546865 | RP11-171L9.1-001    |                                                                | lincRNA                      | 9606 | 12:784489 1 |
| ENST00000548782 | RP11-175P13.3-001   |                                                                | transcribed_unprocessed_pseu | 9606 | 12:100180 1 |
| ENST00000445213 | RP11-180I4.1-001    |                                                                | processed_pseudogene         | 9606 | 9:9565291 1 |
| ENST00000606384 | RP11-182L21.5-001   |                                                                | sense_intronic               | 9606 | 10:796631 2 |
| ENST00000612699 | RP11-189B4.7-001    |                                                                | lincRNA                      | 9606 | 13:464742 2 |
| ENST00000504144 | RP11-18H21.1-003    |                                                                | lincRNA                      | 9606 | 4:1521007 2 |
| ENST00000604299 | RP11-190G13.4-001   |                                                                | processed_pseudogene         | 9606 | 7:1302559 2 |
| ENST00000433123 | RP11-193H5.5-001    |                                                                | processed_pseudogene         | 9606 | 1:2379480 1 |
| ENST00000579660 | RP11-19P22.6-001    |                                                                | processed_pseudogene         | 9606 | 17:276778 1 |
| ENST00000375867 | RP11-1E11.1-001     |                                                                | processed_pseudogene         | 9606 | 9:8818067 2 |
| ENST00000514650 | RP11-1J11.1-001     |                                                                | processed_pseudogene         | 9606 | 4:7130025 2 |
| ENST00000434264 | RP11-206L10.9-017   |                                                                | lincRNA                      | 9606 | 1:778770; 1 |
| ENST00000442302 | RP11-208C17.4-001   |                                                                | processed_pseudogene         | 9606 | 10:950316 1 |
| ENST00000624008 | RP11-20J15.5-001    | uncharacterized protein LOC100130539                           | lincRNA                      | 9606 | 10:442927 2 |
| ENST00000493084 | RP11-216N21.1-001   |                                                                | processed_pseudogene         | 9606 | 8:8601681 1 |
| ENST00000561413 | RP11-219B17.2-002   |                                                                | antisense                    | 9606 | 15:606816 1 |
| ENST00000432108 | RP11-219F10.1-001   |                                                                | lincRNA                      | 9606 | 10:839116 2 |
| ENST00000424997 | RP11-219I21.1-001   |                                                                | processed_pseudogene         | 9606 | 3:4246964 2 |
| ENST00000530418 | RP11-222N13.1-001   |                                                                | lincRNA                      | 9606 | 11:159109 2 |
| ENST00000433646 | RP11-236P24.3-001   |                                                                | lincRNA                      | 9606 | X:5309371 1 |
| ENST00000613682 | RP11-23B5.2-001     |                                                                | processed_pseudogene         | 9606 | 18:484782 2 |
| ENST00000417800 | RP11-240M16.1-001   |                                                                | lincRNA                      | 9606 | 6:1379453 2 |
| ENST00000618630 | RP11-241M13.2-001   |                                                                | unprocessed_pseudogene       | 9606 | 2:8485071 1 |
| ENST00000599172 | RP11-247A12.8-001   |                                                                | antisense                    | 9606 | 9:1291758 2 |
| ENST00000605180 | RP11-24C14.1-001    |                                                                | processed_pseudogene         | 9606 | 6:6671024 1 |
| ENST00000618383 | RP11-255H23.5-001   |                                                                | unprocessed_pseudogene       | 9606 | 19:238425 2 |
| ENST00000548349 | RP11-25J3.2-001     |                                                                | processed_pseudogene         | 9606 | 12:756000 2 |
| ENST00000427176 | RP11-261C10.1-001   |                                                                | lincRNA                      | 9606 | 1:2430058 1 |
| ENST00000437691 | RP11-261C10.2-004   |                                                                | lincRNA                      | 9606 | 1:2430477 1 |
| ENST00000468625 | RP11-274K13.5-001   |                                                                | processed_pseudogene         | 9606 | X:1360978 2 |
| ENST00000584916 | RP11-277J6.3-001    |                                                                | lincRNA                      | 9606 | 17:736625 2 |
| ENST00000497218 | RP11-286B5.1-001    |                                                                | processed_pseudogene         | 9606 | 14:484898 1 |
| ENST00000580956 | RP11-288C17.3-001   |                                                                | processed_pseudogene         | 9606 | 18:135765 1 |
| ENST00000513711 | RP11-292D4.1-001    |                                                                | lincRNA                      | 9606 | 4:1469574 2 |
| ENST00000448562 | RP11-290E.2-001     |                                                                | processed_pseudogene         | 9606 | X:1438063 2 |

|                 |                     |                                                               |                              |      |             |
|-----------------|---------------------|---------------------------------------------------------------|------------------------------|------|-------------|
| ENST00000505623 | RP11-2017.2-003     |                                                               | antisense                    | 9606 | 5:6165847 1 |
| ENST00000427435 | RP11-2P2.1-001      |                                                               | processed_pseudogene         | 9606 | 1:2082552 2 |
| ENST00000510964 | RP11-305P14.1-001   |                                                               | lincRNA                      | 9606 | 5:6629846 1 |
| ENST00000447976 | RP1-130H16.18-004   | Uncharacterized protein (ECO:0000313 Ensembl:ENSP00000400319) | nonsense_mediated_decay      | 9606 | 22:302852 2 |
| ENST00000504017 | RP11-313E19.2-001   |                                                               | antisense                    | 9606 | 4:1766696 2 |
| ENST00000608056 | RP11-314C9.2-001    |                                                               | lincRNA                      | 9606 | 2:3819334 1 |
| ENST00000567853 | RP11-315F22.1-001   |                                                               | lincRNA                      | 9606 | 2:2397349 1 |
| ENST00000510068 | RP11-319G6.1-001    |                                                               | antisense                    | 9606 | 3:1393898 2 |
| ENST00000593122 | RP11-322E11.5-003   |                                                               | lincRNA                      | 9606 | 18:354438 6 |
| ENST00000556286 | RP11-322L17.1-001   |                                                               | processed_pseudogene         | 9606 | 14:442909 2 |
| ENST00000401776 | RP11-323I14_A.1-001 |                                                               | processed_pseudogene         | 9606 | 6:5627652 1 |
| ENST00000445455 | RP11-325E14.2-001   |                                                               | processed_pseudogene         | 9606 | X:8056014 3 |
| ENST00000528510 | RP11-334E6.3-001    |                                                               | antisense                    | 9606 | 11:119380 2 |
| ENST00000428146 | RP11-340I6.5-001    |                                                               | processed_pseudogene         | 9606 | 7:6387634 1 |
| ENST00000419853 | RP11-343J18.1-001   |                                                               | lincRNA                      | 9606 | 9:1262701 1 |
| ENST00000426359 | RP11-345I18.6-001   |                                                               | processed_pseudogene         | 9606 | 1:1792711 1 |
| ENST00000511468 | RP11-346J10.1-001   |                                                               | lincRNA                      | 9606 | 5:1004014 1 |
| ENST00000521984 | RP11-348M17.2-001   |                                                               | antisense                    | 9606 | 5:1616873 1 |
| ENST00000537470 | RP11-351O2.2-001    |                                                               | unprocessed_pseudogene       | 9606 | 12:127624 1 |
| ENST00000485172 | RP11-356M17.1-001   |                                                               | processed_pseudogene         | 9606 | 4:7640125 2 |
| ENST00000557949 | RP11-356M20.1-001   |                                                               | processed_pseudogene         | 9606 | 15:594069 2 |
| ENST00000536931 | RP11-361I14.2-001   |                                                               | antisense                    | 9606 | 12:187147 4 |
| ENST00000423044 | RP11-361M4.1-001    |                                                               | processed_pseudogene         | 9606 | 9:8460411 1 |
| ENST00000484765 | RP11-368I23.2-001   |                                                               | lincRNA                      | 9606 | 3:1689033 1 |
| ENST00000579356 | RP11-370A5.1-002    |                                                               | antisense                    | 9606 | 18:227234 1 |
| ENST00000418270 | RP11-379F12.4-001   |                                                               | lincRNA                      | 9606 | 10:805154 2 |
| ENST00000433085 | RP11-383C6.2-001    |                                                               | lincRNA                      | 9606 | 10:114994 1 |
| ENST00000562191 | RP11-389G6.3-001    |                                                               | sense_overlapping            | 9606 | 3:9775952 1 |
| ENST00000438139 | RP11-380I14.5-001   |                                                               | transcribed_unprocessed_pseu | 9606 | 1:2029865 1 |
| ENST00000508655 | RP11-392L5.2-001    |                                                               | processed_pseudogene         | 9606 | 4:1291331 2 |
| ENST00000449954 | RP11-395L14.3-001   |                                                               | lincRNA                      | 9606 | 2:1135124 2 |
| ENST00000472008 | RP11-399D15.1-001   |                                                               | processed_pseudogene         | 9606 | 12:101228 2 |
| ENST00000445073 | RP11-399E6.1-002    |                                                               | lincRNA                      | 9606 | 1:4124257 2 |
| ENST00000413598 | RP11-3L10.2-001     |                                                               | processed_pseudogene         | 9606 | 7:1214190 1 |
| ENST00000422194 | RP11-402P6.9-001    |                                                               | lincRNA                      | 9606 | X:7166298 3 |
| ENST00000448475 | RP11-403N16.2-001   |                                                               | lincRNA                      | 9606 | 9:7987469 1 |
| ENST00000440329 | RP11-403P14.1-001   |                                                               | processed_pseudogene         | 9606 | 1:1649213 2 |
| ENST00000605247 | RP11-409K15.1-001   |                                                               | processed_pseudogene         | 9606 | 6:6745634 1 |
| ENST00000602854 | RP11-420L9.4-003    |                                                               | sense_overlapping            | 9606 | 6:3831933 1 |
| ENST00000502634 | RP11-420O16.2-001   |                                                               | processed_pseudogene         | 9606 | 5:2030404 3 |
| ENST00000505613 | RP11-432M8.8-001    |                                                               | processed_pseudogene         | 9606 | 5:1760478 1 |
| ENST00000515227 | RP11-434D9.1-006    |                                                               | lincRNA                      | 9606 | 5:6779322 1 |
| ENST00000607823 | RP11-436D23.1-003   |                                                               | lincRNA                      | 9606 | 6:9781670 1 |
| ENST00000509718 | RP11-438C19.2-001   |                                                               | lincRNA                      | 9606 | 5:1150312 1 |
| ENST00000529141 | RP11-438N5.4-001    |                                                               | processed_pseudogene         | 9606 | 11:396127 1 |
| ENST00000564851 | RP11-439I14.1-001   |                                                               | transcribed_processed_pseudo | 9606 | 16:647367 2 |
| ENST00000515178 | RP11-440I14.2-001   |                                                               | lincRNA                      | 9606 | 4:1745237 1 |
| ENST00000542812 | RP11-444B24.2-001   |                                                               | processed_pseudogene         | 9606 | 12:681433 2 |
| ENST00000450784 | RP11-452F19.3-001   |                                                               | lincRNA                      | 9606 | 1:2228150 2 |
| ENST00000457636 | RP11-452F19.3-004   |                                                               | lincRNA                      | 9606 | 1:2228150 2 |
| ENST00000515455 | RP11-455F5.3-001    |                                                               | antisense                    | 9606 | 16:300964 1 |
| ENST00000442231 | RP11-457D2.3-001    |                                                               | antisense                    | 9606 | 10:178628 1 |
| ENST00000535964 | RP11-459D22.1-001   |                                                               | processed_pseudogene         | 9606 | 12:184246 1 |
| ENST00000509711 | RP11-463H12.2-001   |                                                               | lincRNA                      | 9606 | 4:5494363 2 |
| ENST00000477176 | RP11-463H24.1-001   |                                                               | processed_pseudogene         | 9606 | 3:1362055 2 |
| ENST00000556834 | RP11-463J10.2-001   |                                                               | antisense                    | 9606 | 14:519161 1 |
| ENST00000507410 | RP11-466J24.1-001   |                                                               | processed_pseudogene         | 9606 | 4:4358632 2 |
| ENST00000564046 | RP11-467L24.1-001   |                                                               | lincRNA                      | 9606 | 16:643647 2 |
| ENST00000576250 | RP11-473M20.7-001   |                                                               | antisense                    | 9606 | 16:305199 2 |
| ENST00000542449 | RP11-476M19.2-001   |                                                               | lincRNA                      | 9606 | 12:336783 1 |
| ENST00000509476 | RP11-479O16.1-002   |                                                               | antisense                    | 9606 | 5:5874158 1 |
| ENST00000413757 | RP11-482E14.2-002   |                                                               | lincRNA                      | 9606 | 10:353511 1 |
| ENST00000507389 | RP11-485M7.3-001    |                                                               | lincRNA                      | 9606 | 5:1331110 1 |
| ENST00000561884 | RP11-488I20.5-001   |                                                               | processed_pseudogene         | 9606 | 16:353473 2 |
| ENST00000615076 | RP11-493L12.7-001   |                                                               | lincRNA                      | 9606 | 12:472656 1 |
| ENST00000534576 | RP11-510I21.1-001   |                                                               | processed_pseudogene         | 9606 | 8:1402268 2 |
| ENST00000482216 | RP11-510I6.1-001    |                                                               | processed_pseudogene         | 9606 | 5:1215758 2 |
| ENST00000512500 | RP11-517I3.1-002    |                                                               | antisense                    | 9606 | 5:1264804 2 |
| ENST00000437289 | RP11-526P5.2-001    |                                                               | lincRNA                      | 9606 | 10:250180 2 |
| ENST00000511875 | RP11-535C7.1-001    |                                                               | lincRNA                      | 9606 | 4:5204480 1 |
| ENST00000569661 | RP11-548M13.1-001   |                                                               | lincRNA                      | 9606 | 15:550567 1 |
| ENST00000411879 | RP11-154K9.2-001    |                                                               | lincRNA                      | 9606 | X:4225245 2 |
| ENST00000443523 | RP11-556E13.1-001   |                                                               | antisense                    | 9606 | 10:525569 1 |
| ENST00000562685 | RP11-556H2.2-001    |                                                               | sense_intronic               | 9606 | 16:791059 1 |
| ENST00000584105 | RP11-557B23.3-001   |                                                               | unprocessed_pseudogene       | 9606 | 17:677745 2 |
| ENST00000624276 | RP11-560A15.6-001   |                                                               | TEC                          | 9606 | 20:571618 1 |
| ENST00000524017 | RP11-566H8.2-001    |                                                               | lincRNA                      | 9606 | 8:3133919 2 |
| ENST00000568730 | RP11-56L13.1-002    |                                                               | lincRNA                      | 9606 | 16:322629 1 |
| ENST00000455940 | RP11-572H4.1-001    |                                                               | processed_pseudogene         | 9606 | 9:3116561 1 |
| ENST00000583846 | RP11-585K6.2-001    |                                                               | processed_pseudogene         | 9606 | 18:685279 2 |
| ENST00000507903 | RP11-586E1.1-001    |                                                               | processed_pseudogene         | 9606 | 5:6302291 1 |
| ENST00000514187 | RP11-588L15.2-001   |                                                               | antisense                    | 9606 | 4:4042611 2 |
| ENST00000471411 | RP11-615I16.1-001   |                                                               | processed_pseudogene         | 9606 | 12:246426 2 |
| ENST00000590085 | RP11-622J9.1-001    |                                                               | processed_pseudogene         | 9606 | 18:607946 1 |
| ENST00000519013 | RP11-627H.2-001     |                                                               | transcribed_processed_pseudo | 9606 | 8:8961757 4 |
| ENST00000623263 | RP11-63I8.1-001     |                                                               | TEC                          | 9606 | 18:463857 2 |
| ENST00000603429 | RP11-642D6.1-001    |                                                               | processed_pseudogene         | 9606 | 2:6234894 2 |
| ENST00000443685 | RP11-662M24.1-001   |                                                               | lincRNA                      | 9606 | 12:130651 2 |
| ENST00000528913 | RP11-665E10.5-001   |                                                               | processed_pseudogene         | 9606 | 11:878150 1 |
| ENST00000625137 | RP11-678K21.3-001   |                                                               | TEC                          | 9606 | 11:910938 2 |
| ENST00000572530 | RP11-683L23.1-004   | Tubulin beta-8 chain-like protein LOC260334                   | processed_transcript         | 9606 | 18:49815 1  |
| ENST00000510731 | RP11-692C23.1-001   |                                                               | processed_pseudogene         | 9606 | 5:2787451 1 |
| ENST00000510764 | RP11-696N14.1-006   |                                                               | antisense                    | 9606 | 4:9926767 2 |

|                 |                   |                                               |                              |      |             |
|-----------------|-------------------|-----------------------------------------------|------------------------------|------|-------------|
| ENST00000522498 | RP11-6I2.4-001    |                                               | lincRNA                      | 9606 | 8:7410351_3 |
| ENST00000569328 | RP11-700H13.1-001 |                                               | lincRNA                      | 9606 | 16:588478_2 |
| ENST00000505122 | RP11-700N1.1-001  |                                               | lincRNA                      | 9606 | 4:1199395_1 |
| ENST00000547902 | RP11-70F11.7-001  |                                               | lincRNA                      | 9606 | 12:498612_2 |
| ENST00000423149 | RP11-716O23.2-001 |                                               | lincRNA                      | 9606 | 6:1148722_1 |
| ENST00000581173 | RP11-728F11.4-003 |                                               | antisense                    | 9606 | 11:117833_4 |
| ENST00000434426 | RP11-73B2.6-001   |                                               | processed_transcript         | 9606 | 7:6392484_1 |
| ENST00000422707 | RP11-748L13.2-001 |                                               | unprocessed_pseudogene       | 9606 | 10:273313_2 |
| ENST00000541797 | RP11-749H20.1-001 |                                               | lincRNA                      | 9606 | 12:127793_2 |
| ENST00000426027 | RP11-760D2.4-001  |                                               | processed_pseudogene         | 9606 | 7:5652542_1 |
| ENST00000527351 | RP11-762B21.5-001 |                                               | processed_pseudogene         | 9606 | 11:123135_6 |
| ENST00000569293 | RP11-764E7.1-001  |                                               | lincRNA                      | 9606 | 2:1938983_1 |
| ENST00000554187 | RP11-783L4.1-001  |                                               | lincRNA                      | 9606 | 14:661115_1 |
| ENST00000416507 | RP11-787B4.2-001  |                                               | lincRNA                      | 9606 | 9:1160123_1 |
| ENST00000592961 | RP11-799D4.1-001  |                                               | transcribed_processed_pseudo | 9606 | 17:351909_1 |
| ENST00000554043 | RP11-7F17.4-001   |                                               | lincRNA                      | 9606 | 14:770481_1 |
| ENST00000562617 | RP11-809F4.3-001  |                                               | lincRNA                      | 9606 | 3:1759389_1 |
| ENST00000591853 | RP11-815J4.1-001  |                                               | lincRNA                      | 9606 | 18:120815_1 |
| ENST00000428618 | RP11-816B4.1-001  |                                               | processed_pseudogene         | 9606 | 3:1728309_2 |
| ENST00000531260 | RP11-81M19.1-001  |                                               | unprocessed_pseudogene       | 9606 | 11:898957_1 |
| ENST00000581528 | RP11-822E23.3-001 |                                               | processed_pseudogene         | 9606 | 17:215525_1 |
| ENST00000624018 | RP11-826F13.1-001 |                                               | TEC                          | 9606 | 11:706033_2 |
| ENST00000552441 | RP11-845M18.6-001 |                                               | antisense                    | 9606 | 12:523066_1 |
| ENST00000578634 | RP11-846F4.1-001  |                                               | processed_pseudogene         | 9606 | 17:225196_1 |
| ENST00000607010 | RP11-85G21.3-001  |                                               | lincRNA                      | 9606 | 1:1572807_2 |
| ENST00000568867 | RP11-883G10.1-001 |                                               | unprocessed_pseudogene       | 9606 | 15:679850_2 |
| ENST00000495382 | RP11-88H10.2-001  |                                               | lincRNA                      | 9606 | 3:1459399_1 |
| ENST00000455010 | RP11-90C4.3-001   |                                               | lincRNA                      | 9606 | 1:5594508_1 |
| ENST00000554319 | RP11-945F5.1-001  |                                               | lincRNA                      | 9606 | 14:455679_1 |
| ENST00000545739 | RP11-955H22.3-001 |                                               | lincRNA                      | 9606 | 12:127324_1 |
| ENST00000472881 | RP11-959F10.5-001 |                                               | processed_pseudogene         | 9606 | 11:630467_3 |
| ENST00000545814 | RP11-972L6.2-001  |                                               | processed_pseudogene         | 9606 | 12:636516_1 |
| ENST00000625026 | RP11-9N12.2-001   |                                               | antisense                    | 9606 | 4:1542359_1 |
| ENST00000456978 | RP1-215K18.4-001  |                                               | unitary_pseudogene           | 9606 | X:8497321_1 |
| ENST00000424283 | RP1-261G23.5-001  |                                               | lincRNA                      | 9606 | 6:4372278_2 |
| ENST00000424696 | RP1-272L16.1-001  |                                               | lincRNA                      | 9606 | 1:2095284_2 |
| ENST00000403583 | RP1-288M22.1-001  |                                               | processed_pseudogene         | 9606 | 6:7155095_2 |
| ENST00000431947 | RP1-297M16.2-001  |                                               | lincRNA                      | 9606 | 6:1511966_1 |
| ENST00000412817 | RP13-26D14.2-001  |                                               | processed_pseudogene         | 9606 | X:7036148_1 |
| ENST00000427132 | RP13-30A9.1-001   |                                               | antisense                    | 9606 | 20:626336_2 |
| ENST00000616013 | RP13-36E211.3-001 |                                               | processed_pseudogene         | 9606 | X:9020889_1 |
| ENST00000449941 | RP13-455A7.1-001  |                                               | lincRNA                      | 9606 | 22:478606_2 |
| ENST00000405827 | RP1-59B16.1-001   |                                               | processed_pseudogene         | 9606 | 6:2397187_1 |
| ENST00000476099 | RP1-93H18.6-001   |                                               | antisense                    | 9606 | 6:1164607_1 |
| ENST00000433173 | RP3-323B6.1-001   |                                               | processed_pseudogene         | 9606 | X:6546908_1 |
| ENST00000607703 | RP3-337O18.9-001  |                                               | antisense                    | 9606 | 20:458926_4 |
| ENST00000431968 | RP3-477M7.6-001   |                                               | processed_pseudogene         | 9606 | 1:8909742_1 |
| ENST00000474641 | RP3-523E19.2-001  |                                               | antisense                    | 9606 | 6:5391897_2 |
| ENST00000610000 | RP4-569D19.8-001  |                                               | lincRNA                      | 9606 | 22:355269_2 |
| ENST00000425449 | RP4-663N10.1-001  |                                               | antisense                    | 9606 | 1:1152830_2 |
| ENST00000439662 | RP4-700A9.1-001   |                                               | processed_pseudogene         | 9606 | 1:6515448_3 |
| ENST00000488389 | RP4-710M3.1-001   |                                               | processed_pseudogene         | 9606 | 11:303681_2 |
| ENST00000432257 | RP4-763G1.1-001   |                                               | processed_pseudogene         | 9606 | 1:6727805_1 |
| ENST00000450469 | RP4-784A16.3-001  |                                               | sense_intronic               | 9606 | 1:5329179_3 |
| ENST00000412004 | RP5-1052M9.1-001  |                                               | processed_pseudogene         | 9606 | X:1243261_2 |
| ENST00000588260 | RP5-1067M6.3-001  |                                               | lincRNA                      | 9606 | 17:443286_1 |
| ENST00000413033 | RP5-1106H14.1-001 |                                               | processed_pseudogene         | 9606 | 7:1013888_2 |
| ENST00000617644 | RP5-1116H23.5-001 |                                               | lincRNA                      | 9606 | 20:504985_1 |
| ENST00000562756 | RP5-1119A7.17-001 |                                               | sense_overlapping            | 9606 | 22:365608_1 |
| ENST00000447169 | RP5-1158E12.2-001 |                                               | processed_pseudogene         | 9606 | X:4591311_2 |
| ENST00000610899 | RP5-824H1.1-001   |                                               | processed_pseudogene         | 9606 | X:1474763_2 |
| ENST00000620506 | RP5-827E24.1-002  |                                               | lincRNA                      | 9606 | 20:614364_2 |
| ENST00000419780 | RP5-837O21.3-001  |                                               | unprocessed_pseudogene       | 9606 | 1:9392661_1 |
| ENST00000428673 | RP5-865N13.2-001  |                                               | lincRNA                      | 9606 | 1:2321600_2 |
| ENST00000433121 | RP5-908M14.5-001  |                                               | antisense                    | 9606 | 20:624295_2 |
| ENST00000536422 | RP5-944M2.1-001   |                                               | lincRNA                      | 9606 | 12:126400_2 |
| ENST00000419450 | RP5-952N6.1-001   |                                               | lincRNA                      | 9606 | 1:7070645_1 |
| ENST00000422038 | RP6-102O10.1-001  |                                               | lincRNA                      | 9606 | 1:5738657_2 |
| ENST00000546228 | RPEP6-001         | ribulose-5-phosphate-3-epimerase pseudogene 6 | processed_pseudogene         | 9606 | 11:721312_1 |
| ENST00000536489 | RPH3AL-003        | rabphilin 3A-like (without C2 domains)        | protein_coding               | 9606 | 17:213645_3 |
| ENST00000549273 | RPL18-014         | ribosomal protein L18                         | protein_coding               | 9606 | 19:486153_1 |
| ENST00000466869 | RPL19P18-001      | ribosomal protein L19 pseudogene 18           | processed_pseudogene         | 9606 | 17:958990_1 |
| ENST00000491732 | RPL21P129-001     | ribosomal protein L21 pseudogene 129          | processed_pseudogene         | 9606 | 19:775068_2 |
| ENST00000418090 | RPL21P38-001      | ribosomal protein L21 pseudogene 38           | processed_pseudogene         | 9606 | 2:1715870_2 |
| ENST00000417197 | RPL22P18-001      | ribosomal protein L22 pseudogene 18           | processed_pseudogene         | 9606 | 10:801259_2 |
| ENST00000582485 | RPL26-013         | ribosomal protein L26                         | protein_coding               | 9606 | 17:837754_1 |
| ENST00000498718 | RPL29P22-001      | ribosomal protein L29 pseudogene 22           | processed_pseudogene         | 9606 | 11:631158_2 |
| ENST00000491087 | RPL31P56-001      | ribosomal protein L31 pseudogene 56           | processed_pseudogene         | 9606 | 16:553527_2 |
| ENST00000394668 | RPL34-003         | ribosomal protein L34                         | protein_coding               | 9606 | 4:1086206_2 |
| ENST00000484185 | RPL35AP30-001     | ribosomal protein L35a pseudogene 30          | processed_pseudogene         | 9606 | 12:119959_2 |
| ENST00000496996 | RPL36P16-001      | ribosomal protein L36 pseudogene 16           | processed_pseudogene         | 9606 | 19:411698_2 |
| ENST00000435890 | RPL37P21-001      | ribosomal protein L37 pseudogene 21           | processed_pseudogene         | 9606 | 13:683313_1 |
| ENST00000507308 | RPL37P25-001      | ribosomal protein L37 pseudogene 25           | processed_pseudogene         | 9606 | 5:5439943_2 |
| ENST00000448908 | RPL37P4-001       | ribosomal protein L37 pseudogene 4            | processed_pseudogene         | 9606 | 21:195938_2 |
| ENST00000478876 | RPL7P43-001       | ribosomal protein L7 pseudogene 43            | processed_pseudogene         | 9606 | 12:767215_1 |
| ENST00000546990 | RPLP0-025         | ribosomal protein, large, P0                  | protein_coding               | 9606 | 12:120196_4 |
| ENST00000398220 | RPLP2P1-001       | ribosomal protein, large P2, pseudogene 1     | processed_pseudogene         | 9606 | 6:2796517_2 |
| ENST00000412619 | RPS12P24-001      | ribosomal protein S12 pseudogene 24           | processed_pseudogene         | 9606 | 13:372208_1 |
| ENST00000436276 | RPS15AP5-001      | ribosomal protein S15a pseudogene 5           | processed_pseudogene         | 9606 | 10:121713_1 |
| ENST00000396783 | RPS17P1-001       | ribosomal protein S17 pseudogene 1            | processed_pseudogene         | 9606 | 6:2948927_2 |
| ENST00000492356 | RPS21-004         | ribosomal protein S21                         | processed_transcript         | 9606 | 20:623871_1 |
| ENST00000466210 | RPS23P7-001       | ribosomal protein S23 pseudogene 7            | processed_pseudogene         | 9606 | 17:623973_4 |
| ENST00000460178 | RPS29P12-001      | ribosomal protein S29 pseudogene 12           | processed_pseudogene         | 9606 | 5:1809457_1 |

|                 |                |                                                                                                                 |                              |      |             |
|-----------------|----------------|-----------------------------------------------------------------------------------------------------------------|------------------------------|------|-------------|
| ENST00000402041 | RPS29P13-001   | ribosomal protein S29 pseudogene 13                                                                             | processed_pseudogene         | 9606 | 6:1170486 2 |
| ENST00000413190 | RPS3AP1-001    | ribosomal protein S3A pseudogene 1                                                                              | processed_pseudogene         | 9606 | 21:204304 1 |
| ENST00000472940 | RPS6KB1-003    | ribosomal protein S6 kinase, 70kDa, polypeptide 1                                                               | nonsense_mediated_decay      | 9606 | 17:598930 2 |
| ENST00000435134 | RPS7P2-001     | ribosomal protein S7 pseudogene 2                                                                               | processed_pseudogene         | 9606 | 1:1540788 3 |
| ENST00000414704 | RPS7P9-001     | ribosomal protein S7 pseudogene 9                                                                               | processed_pseudogene         | 9606 | 10:807164 2 |
| ENST00000426177 | RPS8P6-001     | ribosomal protein S8 pseudogene 6                                                                               | processed_pseudogene         | 9606 | 3:308714:2  |
| ENST00000433555 | RPUSD3-013     | RNA pseudouridylate synthase domain containing 3                                                                | protein_coding               | 9606 | 3:9841408 2 |
| ENST00000262850 | RRAGB-001      | Ras-related GTP binding B                                                                                       | protein_coding               | 9606 | X:5571788 2 |
| ENST00000339997 | RTN3-001       | reticulin 3                                                                                                     | protein_coding               | 9606 | 11:636814 2 |
| ENST00000474642 | RTN4R-007      | reticulin 4 receptor                                                                                            | processed_transcript         | 9606 | 22:202428 4 |
| ENST00000591123 | SAFB2-005      | scaffold attachment factor B2                                                                                   | nonsense_mediated_decay      | 9606 | 19:559883 4 |
| ENST00000314471 | SAMD4B-001     | sterile alpha motif domain containing 4B                                                                        | protein_coding               | 9606 | 19:393424 1 |
| ENST00000611159 | SAMD4B-202     | sterile alpha motif domain containing 4B                                                                        | protein_coding               | 9606 | 19:393566 1 |
| ENST00000429225 | SAR1AP4-001    | SAR1 homolog A (S. cerevisiae) pseudogene 4                                                                     | processed_pseudogene         | 9606 | X:7584854 2 |
| ENST00000547018 | SCAF11-008     | SR-related CTD-associated factor 11                                                                             | non_stop_decay               | 9606 | 12:459267 1 |
| ENST00000554776 | SCFD1-026      | sec1 family domain containing 1                                                                                 | nonsense_mediated_decay      | 9606 | 14:306282 2 |
| ENST00000445224 | SCHIP1-004     | schwannomin interacting protein 1                                                                               | protein_coding               | 9606 | 3:1598398 2 |
| ENST00000402904 | SCMH1-205      | sex comb on midleg homolog 1 (Drosophila)                                                                       | protein_coding               | 9606 | 1:4102720 1 |
| ENST00000507401 | SCN1A-007      | sodium channel, voltage-gated, type I, alpha subunit                                                            | retained_intron              | 9606 | 2:1660733 2 |
| ENST00000530265 | SCUBE2-009     | signal peptide, CUB domain, EGF-like 2                                                                          | processed_transcript         | 9606 | 11:904807 1 |
| ENST00000533862 | SCYL1-006      | SCY1-like 1 (S. cerevisiae)                                                                                     | protein_coding               | 9606 | 11:655251 1 |
| ENST00000427380 | SDAD1P3-001    | SDA1 domain containing 1 pseudogene 3                                                                           | processed_pseudogene         | 9606 | 3:3377196 1 |
| ENST00000396721 | SDR16C5-003    | short chain dehydrogenase/reductase family 16C, member 5                                                        | protein_coding               | 9606 | 8:5630001 1 |
| ENST00000320982 | SEC14L4-004    | SEC14-like 4 (S. cerevisiae)                                                                                    | nonsense_mediated_decay      | 9606 | 22:304889 1 |
| ENST00000371706 | SEC16A-001     | SEC16 homolog A (S. cerevisiae)                                                                                 | protein_coding               | 9606 | 9:1364401 2 |
| ENST00000436790 | SEC31A-006     | SEC31 homolog A (S. cerevisiae)                                                                                 | processed_transcript         | 9606 | 4:8286321 2 |
| ENST00000465273 | SELENBP1-004   | selenium binding protein 1                                                                                      | retained_intron              | 9606 | 1:1513666 2 |
| ENST00000549518 | SENP1-004      | SUMO1/sentrin specific peptidase 1                                                                              | protein_coding               | 9606 | 12:480453 1 |
| ENST00000583114 | SEPT4-017      | septin 4                                                                                                        | protein_coding               | 9606 | 17:585202 2 |
| ENST00000578131 | SEPT4-021      | septin 4                                                                                                        | nonsense_mediated_decay      | 9606 | 17:585220 2 |
| ENST00000428867 | SEPT7P2-009    | septin 7 pseudogene 2                                                                                           | retained_intron              | 9606 | 7:4575798 2 |
| ENST00000434048 | SEPT7P5-001    | septin 7 pseudogene 5                                                                                           | processed_pseudogene         | 9606 | 7:6349579 1 |
| ENST00000354833 | SERF1A-002     | small EDRK-rich factor 1A (telomeric)                                                                           | protein_coding               | 9606 | 5:7090068 1 |
| ENST00000380750 | SERF1B-001     | small EDRK-rich factor 1B (centromeric)                                                                         | protein_coding               | 9606 | 5:7002526 1 |
| ENST00000525920 | SERGEF-014     | secretion regulating guanine nucleotide exchange factor                                                         | protein_coding               | 9606 | 11:177882 2 |
| ENST00000438844 | SERPINB13-002  | serpin peptidase inhibitor, clade B (ovalbumin), member 13                                                      | nonsense_mediated_decay      | 9606 | 18:635874 1 |
| ENST00000531605 | SERPING1-010   | serpin peptidase inhibitor, clade G (C1 inhibitor), member 1                                                    | processed_transcript         | 9606 | 11:576020 1 |
| ENST00000461103 | SETDB-003      | SET domain containing (lysine methyltransferase) 8                                                              | retained_intron              | 9606 | 12:123389 1 |
| ENST00000534805 | SETDB1-013     | SET domain, bifurcated 1                                                                                        | protein_coding               | 9606 | 1:1509263 1 |
| ENST00000423837 | SETP9-001      | SET pseudogene 9                                                                                                | transcribed_processed_pseudo | 9606 | 1:1606701 2 |
| ENST00000489537 | SF3A3-008      | splicing factor 3a, subunit 3, 60kDa                                                                            | processed_transcript         | 9606 | 1:3797872 2 |
| ENST00000554600 | SHMT2-034      | serine hydroxymethyltransferase 2 (mitochondrial)                                                               | processed_transcript         | 9606 | 12:572296 1 |
| ENST00000438092 | SHPRH-005      | SNF2 histone linker PHD RING helicase, E3 ubiquitin protein ligase                                              | protein_coding               | 9606 | 6:1458848 2 |
| ENST00000483946 | SIDT1-003      | SID1 transmembrane family, member 1                                                                             | retained_intron              | 9606 | 3:1135331 1 |
| ENST00000381621 | SIRPD-003      | signal-regulatory protein delta                                                                                 | protein_coding               | 9606 | 20:153425 1 |
| ENST00000620437 | SIRT2-203      | sirtuin 2                                                                                                       | protein_coding               | 9606 | 19:388790 2 |
| ENST00000505131 | SLAIN2-011     | SLAIN motif family, member 2                                                                                    | nonsense_mediated_decay      | 9606 | 4:4837982 2 |
| ENST00000616933 | SLC12A5-203    | solute carrier family 12 (potassium/chloride transporter), member 5                                             | protein_coding               | 9606 | 20:460291 1 |
| ENST00000561080 | SLC12A6-020    | solute carrier family 12 (potassium/chloride transporter), member 6                                             | nonsense_mediated_decay      | 9606 | 15:342332 1 |
| ENST00000344941 | SLC15A5-001    | solute carrier family 15, member 5                                                                              | protein_coding               | 9606 | 12:161884 2 |
| ENST00000581287 | SLC16A3-001    | solute carrier family 16 (monocarboxylate transporter), member 3                                                | protein_coding               | 9606 | 17:822336 1 |
| ENST00000369779 | SLC16A4-001    | solute carrier family 16, member 4                                                                              | protein_coding               | 9606 | 1:1103628 1 |
| ENST00000441077 | SLC22A18-004   | solute carrier family 22, member 18                                                                             | processed_transcript         | 9606 | 11:291668 2 |
| ENST00000463571 | SLC22A18-007   | solute carrier family 22, member 18                                                                             | retained_intron              | 9606 | 11:291623 2 |
| ENST00000539841 | SLC22A8-005    | solute carrier family 22 (organic anion transporter), member 8                                                  | retained_intron              | 9606 | 11:629891 2 |
| ENST00000545862 | SLC25A10-201   | solute carrier family 25 (mitochondrial carrier; dicarboxylate transporter), member 10                          | protein_coding               | 9606 | 17:817122 2 |
| ENST00000443844 | SLC25A3P1-001  | solute carrier family 25 (mitochondrial carrier; phosphate carrier), member 3 pseudogene 1                      | transcribed_processed_pseudo | 9606 | 1:5343837 1 |
| ENST00000398802 | SLC25A45-201   | solute carrier family 25, member 45                                                                             | protein_coding               | 9606 | 11:653751 1 |
| ENST00000468432 | SLC25A51P1-001 | solute carrier family 25, member 51 pseudogene 1                                                                | processed_pseudogene         | 9606 | 6:6578841 2 |
| ENST00000411502 | SLC26A11-005   | solute carrier family 26 (anion exchanger), member 11                                                           | protein_coding               | 9606 | 17:802204 2 |
| ENST00000393723 | SLC26A5-010    | solute carrier family 26 (anion exchanger), member 5                                                            | protein_coding               | 9606 | 7:1033743 1 |
| ENST00000544936 | SLC2A3-009     | solute carrier family 2 (facilitated glucose transporter), member 3                                             | nonsense_mediated_decay      | 9606 | 12:793135 2 |
| ENST00000473157 | SLC2A4RG-007   | SLC2A4 regulator                                                                                                | processed_transcript         | 9606 | 20:637419 2 |
| ENST00000508585 | SLC2A9-012     | solute carrier family 2 (facilitated glucose transporter), member 9                                             | processed_transcript         | 9606 | 4:9771153 2 |
| ENST00000507685 | SLC34A1-003    | solute carrier family 34 (type II sodium/phosphate cotransporter), member 1                                     | retained_intron              | 9606 | 5:1773844 2 |
| ENST00000319429 | SLC35E3-002    | solute carrier family 35, member E3                                                                             | processed_transcript         | 9606 | 12:687479 1 |
| ENST00000547252 | SLC38A2-006    | solute carrier family 38, member 2                                                                              | processed_transcript         | 9606 | 12:463646 2 |
| ENST00000610458 | SLC38A3-008    | solute carrier family 38, member 3                                                                              | protein_coding               | 9606 | 3:5020524 1 |
| ENST00000621456 | SLC38A3-009    | solute carrier family 38, member 3                                                                              | protein_coding               | 9606 | 3:5020768 1 |
| ENST00000377891 | SLC3A2-003     | solute carrier family 3 (amino acid transporter heavy chain), member 2                                          | protein_coding               | 9606 | 11:628561 1 |
| ENST00000411411 | SLC41A2-009    | solute carrier family 41 (magnesium transporter), member 2                                                      | protein_coding               | 9606 | 12:104928 3 |
| ENST00000547377 | SLC4A7-008     | solute carrier family 4, sodium bicarbonate cotransporter, member 7                                             | nonsense_mediated_decay      | 9606 | 3:2737660 2 |
| ENST00000484027 | SLC50A1-012    | solute carrier family 50 (sugar efflux transporter), member 1                                                   | processed_transcript         | 9606 | 1:1551363 4 |
| ENST00000536262 | SLC5A8-001     | solute carrier family 5 (sodium/monocarboxylate cotransporter), member 8                                        | protein_coding               | 9606 | 12:101155 2 |
| ENST00000551612 | SLC6A15-007    | solute carrier family 6 (neutral amino acid transporter), member 15                                             | protein_coding               | 9606 | 12:848731 2 |
| ENST00000528860 | SLC7A8-007     | solute carrier family 7 (amino acid transporter light chain, L system), member 8                                | nonsense_mediated_decay      | 9606 | 14:231267 2 |
| ENST00000528186 | SLC7A8-012     | solute carrier family 7 (amino acid transporter light chain, L system), member 8                                | retained_intron              | 9606 | 14:231295 2 |
| ENST00000601757 | SLC8A2-007     | solute carrier family 8 (sodium/calcium exchanger), member 2                                                    | processed_transcript         | 9606 | 19:474324 5 |
| ENST00000592108 | SLFN11-007     | schlafen family member 11                                                                                       | protein_coding               | 9606 | 17:353518 2 |
| ENST00000416658 | SLMAP-006      | sarcolemma associated protein                                                                                   | protein_coding               | 9606 | 3:5786458 3 |
| ENST00000509418 | SMARCAD1-006   | SWI/SNF-related, matrix-associated actin-dependent regulator of chromatin, subfamily a, containing DEAD/H box 1 | protein_coding               | 9606 | 4:9425329 2 |
| ENST00000519666 | SMARCD1-011    | SWI/SNF related, matrix associated, actin dependent regulator of chromatin, subfamily d, member 1               | protein_coding               | 9606 | 12:500853 2 |
| ENST00000543702 | SMG1P4-006     | SMG1 pseudogene 4                                                                                               | processed_transcript         | 9606 | 16:218807 1 |
| ENST00000586005 | SMIM22-008     | small integral membrane protein 22                                                                              | protein_coding               | 9606 | 16:479542 1 |
| ENST00000462420 | SMO-003        | smoothened, frizzled class receptor                                                                             | nonsense_mediated_decay      | 9606 | 7:1292061 2 |
| ENST00000508027 | SMR3B-004      | submaxillary gland androgen regulated protein 3B                                                                | retained_intron              | 9606 | 4:9425329 2 |
| ENST00000563830 | SNAP23-017     | synaptosomal-associated protein, 23kDa                                                                          | protein_coding               | 9606 | 15:425152 2 |
| ENST00000384676 | SNORA1.1-204   | Small nucleolar RNA SNORA1                                                                                      | snoRNA                       | 9606 | 11:195911 1 |
| ENST00000516634 | SNORA62.1-205  | Small nucleolar RNA SNORA62/SNORA6 family                                                                       | snoRNA                       | 9606 | 16:697859 1 |
| ENST00000516293 | SNORA63.1-211  | Small nucleolar RNA SNORA63                                                                                     | snoRNA                       | 9606 | 7:6532671 2 |
| ENST00000383910 | SNORA70.1-206  | Small nucleolar RNA SNORA70                                                                                     | snoRNA                       | 9606 | 1:2019784 2 |
| ENST00000364915 | SNORD117-201   | small nucleolar RNA, C/D box 117                                                                                | snoRNA                       | 9606 | 6:3153637 2 |
| ENST00000516231 | snoU109.1-206  | Small nucleolar RNA U109                                                                                        | snoRNA                       | 9606 | 16:686302 2 |

|                 |                |                                                                                    |                         |      |             |
|-----------------|----------------|------------------------------------------------------------------------------------|-------------------------|------|-------------|
| ENST00000459483 | snoU13.1-220   | Small nucleolar RNA U13                                                            | snoRNA                  | 9606 | 17:489566 2 |
| ENST00000458945 | snoU13.1-227   | Small nucleolar RNA U13                                                            | snoRNA                  | 9606 | X:1361343 2 |
| ENST00000409838 | SNX10-004      | sorting nexin 10                                                                   | protein_coding          | 9606 | 7:2636432 2 |
| ENST00000456554 | SNX18P4-001    | sorting nexin 18 pseudogene 4                                                      | processed_pseudogene    | 9606 | 9:6608235 2 |
| ENST00000457286 | SNX8-006       | sorting nexin 8                                                                    | protein_coding          | 9606 | 7:2264393 2 |
| ENST00000613678 | SOC57-002      | suppressor of cytokine signaling 7                                                 | protein_coding          | 9606 | 17:383522 1 |
| ENST00000467753 | SOGA3-002      | SOGA family member 3                                                               | protein_coding          | 9606 | 6:1275165 2 |
| ENST00000371245 | SORBS1-006     | sorbin and SH3 domain containing 1                                                 | protein_coding          | 9606 | 10:953150 2 |
| ENST00000396652 | SOSTDC1-002    | sclerostin domain containing 1                                                     | protein_coding          | 9606 | 7:1646154 1 |
| ENST00000458341 | SP140L-001     | SP140 nuclear body protein-like                                                    | protein_coding          | 9606 | 2:2303420 1 |
| ENST00000414961 | SPAG16-010     | sperm associated antigen 16                                                        | processed_transcript    | 9606 | 2:2132960 2 |
| ENST00000340011 | SPAM1-002      | sperm adhesion molecule 1 (PH-20 hyaluronidase, zona pellucida binding)            | protein_coding          | 9606 | 7:1239253 1 |
| ENST00000574457 | SPATA22-012    | spermatogenesis associated 22                                                      | protein_coding          | 9606 | 17:346274 2 |
| ENST00000428649 | SPATA31A3-001  | SPATA31 subfamily A, member 3                                                      | protein_coding          | 9606 | 9:6698630 1 |
| ENST00000619140 | SPATA31A7-009  | SPATA31 subfamily A, member 7                                                      | processed_transcript    | 9606 | 9:6119132 2 |
| ENST00000434692 | SPATA31B1P-001 | SPATA31 subfamily B, member 1, pseudogene                                          | unprocessed_pseudogene  | 9606 | 9:8205764 1 |
| ENST00000508733 | SPINK5-008     | serine peptidase inhibitor, Kazal type 5                                           | protein_coding          | 9606 | 5:1480639 1 |
| ENST00000395389 | SPN-001        | sialophorin                                                                        | protein_coding          | 9606 | 16:296629 4 |
| ENST00000504871 | SPON2-011      | spondin 2, extracellular matrix protein                                            | processed_transcript    | 9606 | 4:1172587 1 |
| ENST00000436032 | SRGAP3-AS2-002 | SRGAP3 antisense RNA 2                                                             | antisense               | 9606 | 3:9192493 1 |
| ENST00000432981 | SRGAP3-AS3-001 | SRGAP3 antisense RNA 3                                                             | antisense               | 9606 | 3:9216895 1 |
| ENST00000576924 | SRRM2-003      | serine/arginine repetitive matrix 2                                                | protein_coding          | 9606 | 16:275262 1 |
| ENST00000504985 | SSBP2-008      | single-stranded DNA binding protein 2                                              | protein_coding          | 9606 | 5:8141993 2 |
| ENST00000527413 | SSSCA1-003     | Sjogren syndrome/scleroderma autoantigen 1                                         | retained_intron         | 9606 | 11:655708 1 |
| ENST00000522652 | ST3GAL1-003    | ST3 beta-galactoside alpha-2,3-sialyltransferase 1                                 | protein_coding          | 9606 | 8:1334589 2 |
| ENST00000537795 | ST8SIA1-014    | ST8 alpha-N-acetylneuraminidase alpha-2,8-sialyltransferase 1                      | processed_transcript    | 9606 | 12:221071 2 |
| ENST00000583884 | STARD3-025     | StAR-related lipid transfer (START) domain containing 3                            | nonsense_mediated_decay | 9606 | 17:396590 2 |
| ENST00000479417 | STAT5A-005     | signal transducer and activator of transcription 5A                                | retained_intron         | 9606 | 17:423041 2 |
| ENST00000381060 | STATH-003      | stathin                                                                            | protein_coding          | 9606 | 4:6999596 4 |
| ENST00000423004 | STK25-026      | serine/threonine kinase 25                                                         | protein_coding          | 9606 | 2:2414963 2 |
| ENST00000368620 | STK32C-005     | serine/threonine kinase 32C                                                        | protein_coding          | 9606 | 10:132226 2 |
| ENST00000493263 | STK35-003      | serine/threonine kinase 35                                                         | nonsense_mediated_decay | 9606 | 20:210289 1 |
| ENST00000407753 | STK38L-013     | serine/threonine kinase 38 like                                                    | nonsense_mediated_decay | 9606 | 12:273021 2 |
| ENST00000540889 | STX2-005       | syntaxin 2                                                                         | retained_intron         | 9606 | 12:130798 2 |
| ENST00000564581 | SUB1P3-001     | SUB1 pseudogene 3                                                                  | processed_pseudogene    | 9606 | 16:456281 2 |
| ENST00000413931 | SUGCT-004      | succinyl-CoA:glutarate-CoA transferase                                             | protein_coding          | 9606 | 7:4013501 2 |
| ENST00000525999 | SULF1-015      | sulfatase 1                                                                        | protein_coding          | 9606 | 8:6956386 2 |
| ENST00000406622 | SUN2-017       | Sad1 and UNC84 domain containing 2                                                 | protein_coding          | 9606 | 22:387359 2 |
| ENST00000453192 | SUN3-202       | Sad1 and UNC84 domain containing 3                                                 | protein_coding          | 9606 | 7:4798733 1 |
| ENST00000494793 | SUSD4-002      | sushi domain containing 4                                                          | protein_coding          | 9606 | 1:2232208 1 |
| ENST00000420416 | SUV39H2-004    | suppressor of variegation 3-9 homolog 2 (Drosophila)                               | protein_coding          | 9606 | 10:148789 2 |
| ENST00000587442 | SUV420H2-009   | suppressor of variegation 4-20 homolog 2 (Drosophila)                              | processed_transcript    | 9606 | 19:553427 2 |
| ENST00000372898 | SWI5-003       | SWI5 recombination repair homolog (yeast)                                          | protein_coding          | 9606 | 9:1282754 2 |
| ENST00000479535 | SYCE1-002      | synaptonemal complex central element protein 1                                     | retained_intron         | 9606 | 10:133553 2 |
| ENST00000431313 | SYCE1-201      | synaptonemal complex central element protein 1                                     | protein_coding          | 9606 | 10:133554 4 |
| ENST00000550658 | SYF2P1-001     | SYF2 pre-mRNA-splicing factor pseudogene 1                                         | processed_pseudogene    | 9606 | 14:305417 1 |
| ENST00000555612 | SYNE2-008      | spectrin repeat containing, nuclear envelope 2                                     | nonsense_mediated_decay | 9606 | 14:641414 2 |
| ENST00000479510 | SYNGAP1-002    | synaptic Ras GTPase activating protein 1                                           | retained_intron         | 9606 | 6:3342007 1 |
| ENST00000381535 | SYNGR1-005     | synaptogyrin 1                                                                     | protein_coding          | 9606 | 22:393641 2 |
| ENST00000472598 | SYP-002        | synaptophysin                                                                      | protein_coding          | 9606 | X:4918913 1 |
| ENST00000592956 | SYT5-009       | synaptotagmin V                                                                    | retained_intron         | 9606 | 19:551735 1 |
| ENST00000592935 | SYT5-012       | synaptotagmin V                                                                    | processed_transcript    | 9606 | 19:551716 5 |
| ENST00000615887 | TAC3-201       | tachykinin 3                                                                       | protein_coding          | 9606 | 12:570100 1 |
| ENST00000458173 | TACC3-011      | transforming, acidic coiled-coil containing protein 3                              | protein_coding          | 9606 | 4:1723110 1 |
| ENST00000403609 | TANK-003       | TRAF family member-associated NFKB activator                                       | protein_coding          | 9606 | 2:1611796 2 |
| ENST00000429217 | TANK-016       | TRAF family member-associated NFKB activator                                       | protein_coding          | 9606 | 2:1611603 2 |
| ENST00000606292 | TARID-006      | TCF21 antisense RNA inducing promoter demethylation                                | antisense               | 9606 | 6:1335371 2 |
| ENST00000451017 | TARID-007      | TCF21 antisense RNA inducing promoter demethylation                                | antisense               | 9606 | 6:1335022 2 |
| ENST00000512840 | TBC1D19-004    | TBC1 domain family, member 19                                                      | protein_coding          | 9606 | 4:2657668 2 |
| ENST00000617882 | TBC1D3F-201    | TBC1 domain family, member 3F                                                      | protein_coding          | 9606 | 17:363778 2 |
| ENST00000459913 | TBL2-007       | transducin (beta)-like 2                                                           | processed_transcript    | 9606 | 7:7356966 1 |
| ENST00000586706 | TBX2-AS1-005   | TBX2 antisense RNA 1                                                               | antisense               | 9606 | 17:613934 1 |
| ENST00000587717 | TBXA2R-002     | thromboxane A2 receptor                                                            | processed_transcript    | 9606 | 19:359792 2 |
| ENST00000554424 | TC2N-006       | tandem C2 domains, nuclear                                                         | retained_intron         | 9606 | 14:918120 1 |
| ENST00000371331 | TCEANC2-003    | transcription elongation factor A (SII) N-terminal and central domain containing 2 | protein_coding          | 9606 | 1:5405413 2 |
| ENST00000459662 | TCL6-003       | T-cell leukemia/lymphoma 6 (non-protein coding)                                    | lincRNA                 | 9606 | 14:956511 4 |
| ENST00000491611 | TCTEX1D1-002   | Tctex1 domain containing 1                                                         | processed_transcript    | 9606 | 1:6675253 2 |
| ENST00000481318 | TDRD9-006      | tudor domain containing 9                                                          | retained_intron         | 9606 | 14:104049 2 |
| ENST00000575592 | TEKT1-002      | tektin 1                                                                           | nonsense_mediated_decay | 9606 | 17:679966 1 |
| ENST00000584699 | TEX14-006      | testis expressed 14                                                                | processed_transcript    | 9606 | 17:585566 2 |
| ENST00000518257 | TEX15-003      | testis expressed 15                                                                | processed_transcript    | 9606 | 8:3087499 3 |
| ENST00000310125 | TFDP3-001      | transcription factor Dp family, member 3                                           | protein_coding          | 9606 | X:1332166 2 |
| ENST00000403298 | TFEB-201       | transcription factor EB                                                            | protein_coding          | 9606 | 6:4168397 2 |
| ENST00000398431 | TFF3-002       | trefol factor 3 (intestinal)                                                       | protein_coding          | 9606 | 21:423120 2 |
| ENST00000620299 | TFG-203        | TRK-fused gene                                                                     | protein_coding          | 9606 | 3:1007093 2 |
| ENST00000453013 | TFPI-005       | tissue factor pathway inhibitor (lipoprotein-associated coagulation inhibitor)     | protein_coding          | 9606 | 2:1874968 2 |
| ENST00000518058 | TG-004         | thyroglobulin                                                                      | protein_coding          | 9606 | 8:1329629 2 |
| ENST00000556285 | TGFB3-002      | transforming growth factor, beta 3                                                 | protein_coding          | 9606 | 14:759630 1 |
| ENST00000561067 | TGM1-004       | transglutaminase 1                                                                 | protein_coding          | 9606 | 14:242623 2 |
| ENST00000409232 | TGOLN2-006     | trans-golgi network protein 2                                                      | protein_coding          | 9606 | 2:8532189 2 |
| ENST00000469226 | TH-009         | tyrosine hydroxylase                                                               | retained_intron         | 9606 | 11:216689 1 |
| ENST00000476349 | THNSL2-007     | threonine synthase-like 2 (S. cerevisiae)                                          | retained_intron         | 9606 | 2:8817895 1 |
| ENST00000253952 | THOC6-006      | THO complex 6 homolog (Drosophila)                                                 | protein_coding          | 9606 | 16:302406 2 |
| ENST00000546243 | THRA-006       | thyroid hormone receptor, alpha                                                    | protein_coding          | 9606 | 17:400689 1 |
| ENST00000408005 | THSD7A-004     | thrombospondin, type 1, domain containing 7A                                       | retained_intron         | 9606 | 7:1137462 2 |
| ENST00000612912 | TJAP1-205      | tight junction associated protein 1 (peripheral)                                   | protein_coding          | 9606 | 6:4349698 2 |
| ENST00000346128 | TJP1-001       | tight junction protein 1                                                           | protein_coding          | 9606 | 15:296993 1 |
| ENST00000487660 | TKT-013        | transketolase                                                                      | retained_intron         | 9606 | 3:5323485 1 |
| ENST00000529148 | TMA16P1-001    | translation machinery associated 16 homolog pseudogene 1                           | processed_pseudogene    | 9606 | 11:587962 2 |
| ENST00000514135 | TMEM161B-006   | transmembrane protein 161B                                                         | protein_coding          | 9606 | 5:8818963 2 |
| ENST00000511218 | TMEM161B-010   | transmembrane protein 161B                                                         | protein_coding          | 9606 | 5:8819582 4 |
| ENST00000296776 | TMEM174-001    | transmembrane protein 174                                                          | protein_coding          | 9606 | 5:7317319 1 |
| ENST00000511737 | TMEM174-002    | transmembrane protein 174                                                          | processed_transcript    | 9606 | 5:7317329 1 |

|                 |                |                                                                        |                         |      |            |   |
|-----------------|----------------|------------------------------------------------------------------------|-------------------------|------|------------|---|
| ENST00000468449 | TMEM183A-002   | transmembrane protein 183A                                             | processed_transcript    | 9606 | 1:2030077  | 1 |
| ENST00000450925 | TMEM191A-001   | transmembrane protein 191A (pseudogene)                                | lincRNA                 | 9606 | 22:207011  | 1 |
| ENST00000456566 | TMEM191C-202   | transmembrane protein 191C                                             | lincRNA                 | 9606 | 22:214664  | 1 |
| ENST00000444545 | TMEM194B-003   | transmembrane protein 194B                                             | nonsense_mediated_decay | 9606 | 2:1905144  | 2 |
| ENST00000321326 | TMEM214-003    | transmembrane protein 214                                              | nonsense_mediated_decay | 9606 | 2:2703295  | 2 |
| ENST00000478104 | TMEM222-009    | transmembrane protein 222                                              | nonsense_mediated_decay | 9606 | 1:2732228  | 2 |
| ENST00000528595 | TMEM225-002    | transmembrane protein 225                                              | protein_coding          | 9606 | 11:123883  | 1 |
| ENST00000438392 | TMEM244-201    | transmembrane protein 244                                              | protein_coding          | 9606 | 6:1298313  | 4 |
| ENST00000449601 | TMEM247-002    | transmembrane protein 247                                              | processed_transcript    | 9606 | 2:4642919  | 1 |
| ENST00000462884 | TMEM45A-003    | transmembrane protein 45A                                              | processed_transcript    | 9606 | 3:1005192  | 2 |
| ENST00000468704 | TMEM50A-005    | transmembrane protein 50A                                              | processed_transcript    | 9606 | 1:2533846  | 2 |
| ENST00000522780 | TMEM71-010     | transmembrane protein 71                                               | protein_coding          | 9606 | 8:1326850  | 2 |
| ENST00000463427 | TMEM87B-004    | transmembrane protein 87B                                              | processed_transcript    | 9606 | 2:1120860  | 2 |
| ENST00000538566 | TMIGD1-002     | transmembrane and immunoglobulin domain containing 1                   | protein_coding          | 9606 | 17:303163  | 1 |
| ENST00000343315 | TMPO-014       | thymopoietin                                                           | protein_coding          | 9606 | 12:985156  | 1 |
| ENST00000422787 | TMPRSS15-002   | transmembrane protease, serine 15                                      | protein_coding          | 9606 | 21:183651  | 2 |
| ENST00000504642 | TNFAIP8-004    | tumor necrosis factor, alpha-induced protein 8                         | protein_coding          | 9606 | 5:1193553  | 2 |
| ENST00000492571 | TNFRSF9-002    | tumor necrosis factor receptor superfamily, member 9                   | nonsense_mediated_decay | 9606 | 1:7933127  | 2 |
| ENST00000374044 | TNFSF15-002    | tumor necrosis factor (ligand) superfamily, member 15                  | protein_coding          | 9606 | 9:1147893  | 2 |
| ENST00000367312 | TNNI1-003      | troponin I type 1 (skeletal, slow)                                     | protein_coding          | 9606 | 1:2014098  | 1 |
| ENST00000592920 | TNNI1-008      | troponin T type 1 (skeletal, slow)                                     | processed_transcript    | 9606 | 19:551380  | 2 |
| ENST00000560751 | TNP2-002       | transition protein 2 (during histone to protamine replacement)         | retained_intron         | 9606 | 16:112677  | 1 |
| ENST00000613741 | TONSL-201      | tonsoku-like, DNA repair protein                                       | protein_coding          | 9606 | 8:1444366  | 2 |
| ENST00000577934 | TP53I13-007    | tumor protein p53 inducible protein 13                                 | nonsense_mediated_decay | 9606 | 17:295685  | 2 |
| ENST00000380148 | TP53TG3D-001   | TP53 target 3D                                                         | nonsense_mediated_decay | 9606 | 16:322533  | 1 |
| ENST00000538212 | TPK1-014       | thiamin pyrophosphokinase 1                                            | protein_coding          | 9606 | 7:1444519  | 1 |
| ENST00000469607 | TPO-012        | thyroid peroxidase                                                     | protein_coding          | 9606 | 2:1484665  | 1 |
| ENST00000428886 | TPP1-002       | tripeptidyl peptidase I                                                | retained_intron         | 9606 | 11:661699  | 1 |
| ENST00000480281 | TPST1-002      | tyrosylprotein sulfotransferase 1                                      | processed_transcript    | 9606 | 7:6620533  | 3 |
| ENST00000530705 | TPT1-001       | tumor protein, translationally-controlled 1                            | protein_coding          | 9606 | 13:453334  | 1 |
| ENST00000417243 | TRAPP12-018    | trafficking protein particle complex 12                                | nonsense_mediated_decay | 9606 | 2:3421883  | 2 |
| ENST00000587818 | TRAPPC6A-005   | trafficking protein particle complex 6A                                | retained_intron         | 9606 | 19:451647  | 2 |
| ENST00000610566 | TRBC2-201      | T cell receptor beta constant 2                                        | TR_C_gene               | 9606 | 7:1426707  | 1 |
| ENST00000390413 | TRBJ2-2-001    | T cell receptor beta joining 2-2                                       | TR_J_gene               | 9606 | 7:1427965  | 2 |
| ENST00000390363 | TRBV9-001      | T cell receptor beta variable 9                                        | TR_V_gene               | 9606 | 7:1423918  | 2 |
| ENST00000435350 | TRHDE-AS1-001  | TRHDE antisense RNA 1                                                  | antisense               | 9606 | 12:722535  | 1 |
| ENST00000549957 | TRHDE-AS1-003  | TRHDE antisense RNA 1                                                  | retained_intron         | 9606 | 12:722535  | 2 |
| ENST00000479800 | TRIM17-004     | tripartite motif containing 17                                         | protein_coding          | 9606 | 1:2284091  | 2 |
| ENST00000532195 | TRIM29-014     | tripartite motif containing 29                                         | retained_intron         | 9606 | 11:120127  | 2 |
| ENST00000272395 | TRIM43-001     | tripartite motif containing 43                                         | protein_coding          | 9606 | 2:9559201  | 1 |
| ENST00000448984 | TRIM49C-001    | tripartite motif containing 49C                                        | protein_coding          | 9606 | 11:900311  | 1 |
| ENST00000244891 | TRIM51-001     | tripartite motif-containing 51                                         | protein_coding          | 9606 | 11:558859  | 1 |
| ENST00000503141 | TRIML2-005     | tripartite motif family-like 2                                         | nonsense_mediated_decay | 9606 | 4:1880913  | 1 |
| ENST00000417475 | TRIP6-003      | thyroid hormone receptor interactor 6                                  | nonsense_mediated_decay | 9606 | 7:1008673  | 1 |
| ENST00000399736 | TRO-011        | trophinin                                                              | protein_coding          | 9606 | X:542081   | 2 |
| ENST00000358082 | TRPM3-015      | transient receptor potential cation channel, subfamily M, member 3     | protein_coding          | 9606 | 9:7053595  | 2 |
| ENST00000360774 | TRPM6-001      | transient receptor potential cation channel, subfamily M, member 6     | protein_coding          | 9606 | 9:7472249  | 1 |
| ENST00000491992 | TSPAN2-003     | tetraspanin 2                                                          | processed_transcript    | 9606 | 1:1150504  | 2 |
| ENST00000446063 | TSPAN32-002    | tetraspanin 32                                                         | nonsense_mediated_decay | 9606 | 11:232021  | 1 |
| ENST00000430181 | TSPEAR-AS1-002 | TSPEAR antisense RNA 1                                                 | antisense               | 9606 | 21:445106  | 2 |
| ENST00000574792 | TSSK3-004      | testis-specific serine kinase 3                                        | processed_transcript    | 9606 | 1:3235272  | 1 |
| ENST00000465625 | TTC14-010      | tetratricopeptide repeat domain 14                                     | processed_transcript    | 9606 | 3:1806081  | 2 |
| ENST00000418766 | TTC3-008       | tetratricopeptide repeat domain 3                                      | protein_coding          | 9606 | 21:370732  | 2 |
| ENST00000477524 | TLL7-003       | tubulin tyrosine ligase-like family, member 7                          | processed_transcript    | 9606 | 1:8366502  | 2 |
| ENST00000482783 | TLL7-008       | tubulin tyrosine ligase-like family, member 7                          | processed_transcript    | 9606 | 1:8391768  | 2 |
| ENST00000597686 | TUBB4A-005     | tubulin, beta 4A class IVa                                             | protein_coding          | 9606 | 19:649613  | 2 |
| ENST00000594290 | TUBB4A-012     | tubulin, beta 4A class IVa                                             | nonsense_mediated_decay | 9606 | 19:649617  | 2 |
| ENST00000561967 | TUBB8-007      | tubulin, beta 8 class VIII                                             | protein_coding          | 9606 | 10:47057-2 | 2 |
| ENST00000376094 | TUBD1-003      | tubulin, delta 1                                                       | protein_coding          | 9606 | 17:598602  | 1 |
| ENST00000498606 | TUFT1-012      | tuftelin 1                                                             | retained_intron         | 9606 | 1:1515403  | 2 |
| ENST00000540687 | TUG1-003       | taurine up-regulated 1 (non-protein coding)                            | antisense               | 9606 | 22:309706  | 2 |
| ENST00000610453 | TULP3-201      | tubby like protein 3                                                   | protein_coding          | 9606 | 12:289090  | 2 |
| ENST00000554321 | TUNAR-003      | TCL1 upstream neural differentiation-associated RNA                    | lincRNA                 | 9606 | 14:958768  | 2 |
| ENST00000509177 | TUSC3-013      | tumor suppressor candidate 3                                           | retained_intron         | 9606 | 8:1562307  | 2 |
| ENST00000477805 | TUSC7-004      | tumor suppressor candidate 7 (non-protein coding)                      | antisense               | 9606 | 3:1167097  | 1 |
| ENST00000441872 | TXNIP1-001     | thioredoxin pseudogene 1                                               | processed_pseudogene    | 9606 | 10:119683  | 1 |
| ENST00000412543 | UBAP2-005      | ubiquitin associated protein 2                                         | protein_coding          | 9606 | 9:3394451  | 1 |
| ENST00000414760 | UBE2V1P9-001   | ubiquitin-conjugating enzyme E2 variant 1 pseudogene 9                 | processed_pseudogene    | 9606 | X:9028953  | 1 |
| ENST00000434717 | UBE2V2P1-001   | ubiquitin-conjugating enzyme E2 variant 2 pseudogene 1                 | processed_pseudogene    | 9606 | 10:190514  | 2 |
| ENST00000429033 | UBE3AP2-001    | ubiquitin protein ligase E3A pseudogene 2                              | processed_pseudogene    | 9606 | 21:310606  | 2 |
| ENST00000590068 | UBL5-009       | ubiquitin-like 5                                                       | protein_coding          | 9606 | 19:982789  | 2 |
| ENST00000609762 | UBN2-004       | ubiquitin 2                                                            | retained_intron         | 9606 | 7:1392936  | 1 |
| ENST00000540917 | UEVLD-014      | UEV and lactate/malate dehydrogenase domains                           | processed_transcript    | 9606 | 11:185648  | 1 |
| ENST00000623646 | UG0898H09-001  | uncharacterized LOC643763                                              | lincRNA                 | 9606 | 8:6297786  | 2 |
| ENST00000453224 | ULK4-007       | unc-51 like kinase 4                                                   | nonsense_mediated_decay | 9606 | 3:4193586  | 2 |
| ENST00000508903 | UNKL-002       | unkempt family zinc finger-like                                        | protein_coding          | 9606 | 16:136501  | 1 |
| ENST00000625190 | USP17L8-201    | ubiquitin specific peptidase 17-like family member 8                   | protein_coding          | 9606 | 8:7971661  | 1 |
| ENST00000598197 | USP29-004      | ubiquitin specific peptidase 29                                        | protein_coding          | 9606 | 19:571286  | 1 |
| ENST00000444558 | USP32P1-006    | ubiquitin specific peptidase 32 pseudogene 1                           | processed_transcript    | 9606 | 17:167944  | 2 |
| ENST00000545955 | UTY-205        | ubiquitously transcribed tetratricopeptide repeat containing, Y-linked | protein_coding          | 9606 | Y:1324837  | 1 |
| ENST00000623120 | UTY-209        | Histone demethylase UTY (ECO:0000313 Ensembl:ENSP00000442047)          | protein_coding          | 9606 | Y:1324985  | 2 |
| ENST00000477288 | VARS2-002      | valyl-tRNA synthetase 2, mitochondrial                                 | retained_intron         | 9606 | 6:3090824  | 1 |
| ENST00000493155 | VASH2-008      | vasohibin 2                                                            | processed_transcript    | 9606 | 1:2129515  | 2 |
| ENST00000381029 | VCX3B-201      | variable charge, X-linked 3B                                           | protein_coding          | 9606 | X:8465426  | 1 |
| ENST00000434069 | VDAC1P3-001    | voltage-dependent anion channel 1 pseudogene 3                         | processed_pseudogene    | 9606 | X:9198265  | 1 |
| ENST00000311170 | VN1R4-001      | vomeranosal 1 receptor 4                                               | protein_coding          | 9606 | 19:532666  | 2 |
| ENST00000412929 | VN1R66P-001    | vomeranosal 1 receptor 66 pseudogene                                   | unprocessed_pseudogene  | 9606 | 16:316483  | 1 |
| ENST00000497645 | VWA7-003       | von Willebrand factor A domain containing 7                            | processed_transcript    | 9606 | 6:3177605  | 3 |
| ENST00000461942 | WDR31-003      | WD repeat domain 31                                                    | processed_transcript    | 9606 | 9:1133156  | 2 |
| ENST00000472600 | WDR49-003      | WD repeat domain 49                                                    | protein_coding          | 9606 | 3:1674786  | 1 |
| ENST00000466760 | WDR49-005      | WD repeat domain 49                                                    | protein_coding          | 9606 | 3:1675547  | 1 |
| ENST00000420061 | WDR90-005      | WD repeat domain 90                                                    | retained_intron         | 9606 | 16:649353  | 2 |
| ENST00000557825 | WDR93-005      | WD repeat domain 93                                                    | processed_transcript    | 9606 | 15:897196  | 2 |

|                 |                   |                                                                               |                         |      |             |
|-----------------|-------------------|-------------------------------------------------------------------------------|-------------------------|------|-------------|
| ENST00000573440 | WFIKKN1-002       | WAP, follistatin/kazal, immunoglobulin, kunitz and netrin domain containing 1 | retained_intron         | 9606 | 16:629239 1 |
| ENST00000471243 | WLS-012           | wntless Wnt ligand secretion mediator                                         | protein_coding          | 9606 | 1:6815517 2 |
| ENST00000474009 | WNK2-007          | WNK lysine deficient protein kinase 2                                         | processed_transcript    | 9606 | 9:9329308 1 |
| ENST00000497817 | WNT5A-008         | wingless-type MMTV integration site family, member 5A                         | retained_intron         | 9606 | 3:5547904 1 |
| ENST00000397196 | WNT5B-001         | wingless-type MMTV integration site family, member 5B                         | protein_coding          | 9606 | 12:162919 2 |
| ENST00000538854 | WNT5B-003         | wingless-type MMTV integration site family, member 5B                         | processed_transcript    | 9606 | 12:161666 1 |
| ENST00000583096 | WSB1-017          | WD repeat and SOCS box containing 1                                           | retained_intron         | 9606 | 17:273033 2 |
| ENST00000574232 | WSCD1-004         | WSC domain containing 1                                                       | protein_coding          | 9606 | 17:607110 2 |
| ENST00000472697 | XRN1-005          | 5'-3' exoribonuclease 1                                                       | retained_intron         | 9606 | 3:1423762 3 |
| ENST00000575674 | XYLT1-004         | xylosyltransferase I                                                          | retained_intron         | 9606 | 16:171980 2 |
| ENST00000362760 | Y_RNA.1-252       | Y RNA                                                                         | misc_RNA                | 9606 | 6:8984132 2 |
| ENST00000362996 | Y_RNA.1-280       | Y RNA                                                                         | misc_RNA                | 9606 | 2:1725581 2 |
| ENST00000363171 | Y_RNA.1-303       | Y RNA                                                                         | misc_RNA                | 9606 | 9:7518152 2 |
| ENST00000363391 | Y_RNA.1-328       | Y RNA                                                                         | misc_RNA                | 9606 | 9:1121692 2 |
| ENST00000363985 | Y_RNA.1-395       | Y RNA                                                                         | misc_RNA                | 9606 | 11:108084 1 |
| ENST00000364879 | Y_RNA.1-492       | Y RNA                                                                         | misc_RNA                | 9606 | 9:1146154 2 |
| ENST00000365043 | Y_RNA.1-510       | Y RNA                                                                         | misc_RNA                | 9606 | 7:1003307 1 |
| ENST00000365600 | Y_RNA.1-575       | Y RNA                                                                         | misc_RNA                | 9606 | 12:952757 1 |
| ENST00000383955 | Y_RNA.1-601       | Y RNA                                                                         | misc_RNA                | 9606 | 5:3150568 2 |
| ENST00000384097 | Y_RNA.1-638       | Y RNA                                                                         | misc_RNA                | 9606 | 17:503861 4 |
| ENST00000384333 | Y_RNA.1-675       | Y RNA                                                                         | misc_RNA                | 9606 | 7:1561861 2 |
| ENST00000384358 | Y_RNA.1-680       | Y RNA                                                                         | misc_RNA                | 9606 | 2:9615267 1 |
| ENST00000384586 | Y_RNA.1-731       | Y RNA                                                                         | misc_RNA                | 9606 | 3:8843119 2 |
| ENST00000459424 | Y_RNA.1-840       | Y RNA                                                                         | misc_RNA                | 9606 | 4:5550159 1 |
| ENST00000588002 | YIF1B-007         | Yip1 interacting factor homolog B (S. cerevisiae)                             | protein_coding          | 9606 | 19:383074 2 |
| ENST00000460903 | YIPF3-002         | Yip1 domain family, member 3                                                  | retained_intron         | 9606 | 6:4351553 1 |
| ENST00000434742 | Z83001.1-001      |                                                                               | antisense               | 9606 | 11:317277 2 |
| ENST00000408372 | Z83826.1-201      |                                                                               | miRNA                   | 9606 | X:1348957 2 |
| ENST00000426659 | ZBTB32-003        | zinc finger and BTB domain containing 32                                      | protein_coding          | 9606 | 19:357045 2 |
| ENST00000588028 | ZBTB7C-018        | zinc finger and BTB domain containing 7C                                      | protein_coding          | 9606 | 18:480410 2 |
| ENST00000590437 | ZBTB7C-027        | zinc finger and BTB domain containing 7C                                      | protein_coding          | 9606 | 18:480409 2 |
| ENST00000474453 | ZCCHC11-016       | zinc finger, CCHC domain containing 11                                        | protein_coding          | 9606 | 1:5243124 2 |
| ENST00000508058 | ZCCHC4-005        | zinc finger, CCHC domain containing 4                                         | retained_intron         | 9606 | 4:2536170 2 |
| ENST00000552693 | ZDHHC17-014       | zinc finger, DHHC-type containing 17                                          | retained_intron         | 9606 | 12:768439 1 |
| ENST00000517334 | ZDHHC2-005        | zinc finger, DHHC-type containing 2                                           | retained_intron         | 9606 | 8:1720801 2 |
| ENST00000369404 | ZDHHC6-002        | zinc finger, DHHC-type containing 6                                           | protein_coding          | 9606 | 10:112430 4 |
| ENST00000401903 | ZFAND2A-005       | zinc finger, AN1-type domain 2A                                               | protein_coding          | 9606 | 7:1152071 2 |
| ENST00000558087 | ZFAND6-021        | zinc finger, AN1-type domain 6                                                | protein_coding          | 9606 | 15:800751 2 |
| ENST00000571720 | ZFP90-024         | ZFP90 zinc finger protein                                                     | retained_intron         | 9606 | 16:685620 2 |
| ENST00000515169 | ZFYVE28-007       | zinc finger, FYVE domain containing 28                                        | protein_coding          | 9606 | 4:2328534 2 |
| ENST00000361625 | ZFYVE9-003        | zinc finger, FYVE domain containing 9                                         | retained_intron         | 9606 | 1:5214237 2 |
| ENST00000369967 | ZGPAT-003         | zinc finger, CCCH-type with G patch domain                                    | protein_coding          | 9606 | 20:637080 2 |
| ENST00000264370 | ZGRF1-006         | zinc finger, GRF-type containing 1                                            | retained_intron         | 9606 | 4:1126055 1 |
| ENST00000543668 | ZKSCAN7P1-001     | zinc finger with KRAB and SCAN domains 7 pseudogene 1                         | processed_pseudogene    | 9606 | 12:184930 1 |
| ENST00000615423 | ZMI22-202         | zinc finger, MIZ-type containing 2                                            | protein_coding          | 9606 | 7:4475625 1 |
| ENST00000373981 | ZMYM3-003         | zinc finger, MYM-type 3                                                       | protein_coding          | 9606 | X:7124920 1 |
| ENST00000317538 | ZMYM6-002         | zinc finger, MYM-type 6                                                       | protein_coding          | 9606 | 1:3501724 1 |
| ENST00000531501 | ZNF123P-001       | zinc finger protein 123, pseudogene                                           | processed_pseudogene    | 9606 | 11:129295 2 |
| ENST00000324823 | ZNF185-203        | zinc finger protein 185 (LIM domain)                                          | protein_coding          | 9606 | X:1529181 2 |
| ENST00000565100 | ZNF19-004         | zinc finger protein 19                                                        | protein_coding          | 9606 | 16:714743 2 |
| ENST00000462724 | ZNF212-002        | zinc finger protein 212                                                       | nonsense_mediated_decay | 9606 | 7:1492396 1 |
| ENST00000579322 | ZNF236-004        | zinc finger protein 236                                                       | protein_coding          | 9606 | 18:768491 2 |
| ENST00000535298 | ZNF324-201        | zinc finger protein 324                                                       | protein_coding          | 9606 | 19:584670 1 |
| ENST00000476796 | ZNF33B-003        | zinc finger protein 33B                                                       | retained_intron         | 9606 | 10:426318 2 |
| ENST00000534729 | ZNF345-009        | zinc finger protein 345                                                       | processed_transcript    | 9606 | 19:368516 2 |
| ENST00000461412 | ZNF365-007        | zinc finger protein 365                                                       | processed_transcript    | 9606 | 10:626438 2 |
| ENST00000589413 | ZNF383-004        | zinc finger protein 383                                                       | protein_coding          | 9606 | 19:372182 2 |
| ENST00000551771 | ZNF385A-008       | zinc finger protein 385A                                                      | protein_coding          | 9606 | 12:543701 1 |
| ENST00000582337 | ZNF407-002        | zinc finger protein 407                                                       | protein_coding          | 9606 | 18:745978 2 |
| ENST00000600353 | ZNF418-007        | zinc finger protein 418                                                       | processed_transcript    | 9606 | 19:579348 2 |
| ENST00000561648 | ZNF423-001        | zinc finger protein 423                                                       | protein_coding          | 9606 | 16:494875 2 |
| ENST00000455504 | ZNF433-002        | zinc finger protein 433                                                       | protein_coding          | 9606 | 19:120164 2 |
| ENST00000411443 | ZNF502-003        | zinc finger protein 502                                                       | protein_coding          | 9606 | 3:4471267 2 |
| ENST00000590766 | ZNF506-011        | zinc finger protein 506                                                       | protein_coding          | 9606 | 19:197909 2 |
| ENST00000217130 | ZNF512B-201       | zinc finger protein 512B                                                      | protein_coding          | 9606 | 20:639596 2 |
| ENST00000528012 | ZNF517-009        | zinc finger protein 517                                                       | protein_coding          | 9606 | 8:1447989 2 |
| ENST00000409544 | ZNF638-002        | zinc finger protein 638                                                       | protein_coding          | 9606 | 2:7133176 1 |
| ENST00000467231 | ZNF644-007        | zinc finger protein 644                                                       | processed_transcript    | 9606 | 1:9091639 2 |
| ENST00000595534 | ZNF682-009        | zinc finger protein 682                                                       | nonsense_mediated_decay | 9606 | 19:200071 2 |
| ENST00000468455 | ZNF692-014        | zinc finger protein 692                                                       | processed_transcript    | 9606 | 1:2488557 2 |
| ENST00000507078 | ZNF721-004        | zinc finger protein 721                                                       | processed_transcript    | 9606 | 4:435770~2  |
| ENST00000355095 | ZNF736-201        | zinc finger protein 736                                                       | protein_coding          | 9606 | 7:6431280 1 |
| ENST00000252797 | ZNF764-001        | zinc finger protein 764                                                       | protein_coding          | 9606 | 16:305537 2 |
| ENST00000560038 | ZNF774-003        | zinc finger protein 774                                                       | nonsense_mediated_decay | 9606 | 15:903523 1 |
| ENST00000558115 | ZNF774-004        | zinc finger protein 774                                                       | processed_transcript    | 9606 | 15:903523 1 |
| ENST00000600457 | ZNF83-013         | zinc finger protein 83                                                        | processed_transcript    | 9606 | 19:526540 5 |
| ENST00000301096 | ZNF83-201         | zinc finger protein 83                                                        | protein_coding          | 9606 | 19:526123 2 |
| ENST00000592587 | ZNF846-006        | zinc finger protein 846                                                       | protein_coding          | 9606 | 19:75987 2  |
| ENST00000596534 | ZNF85-009         | zinc finger protein 85                                                        | protein_coding          | 9606 | 19:209365 2 |
| ENST00000598862 | ZNF85-012         | zinc finger protein 85                                                        | protein_coding          | 9606 | 19:209366 2 |
| ENST00000434475 | ZNF90-201         | zinc finger protein 90                                                        | protein_coding          | 9606 | 19:201249 1 |
| ENST00000595533 | ZNF91-003         | zinc finger protein 91                                                        | protein_coding          | 9606 | 19:233621 2 |
| ENST00000599281 | ZNF91-007         | zinc finger protein 91                                                        | processed_transcript    | 9606 | 19:233388 2 |
| ENST00000600543 | ZNF92P2-001       | zinc finger protein 92 pseudogene 2                                           | processed_pseudogene    | 9606 | 19:221286 1 |
| ENST00000622597 | ZNRD1-AS1_2.1-202 | ZNRD1 antisense RNA 1 conserved region 2                                      | misc_RNA                | 9606 | 10:121949 2 |
| ENST00000431012 | ZNRD1-AS1-005     | ZNRD1 antisense RNA 1                                                         | antisense               | 9606 | 6:3005460 2 |
| ENST00000466960 | ZP3-004           | zona pellucida glycoprotein 3 (sperm receptor)                                | retained_intron         | 9606 | 7:7643395 1 |
| ENST00000604524 | ZSWIM8-019        | zinc finger, SWIM-type containing 8                                           | protein_coding          | 9606 | 10:737856 1 |

**Table S8. Angiogenes, specific Liver not Heart**

| Accession  | Name           | Description                                                          | Biotype    | Tax ID | Location  | # of Detections |
|------------|----------------|----------------------------------------------------------------------|------------|--------|-----------|-----------------|
| ENST000001 | AADAC-001      | arylacетamide deacetylase                                            | protein_cc | 9606   | 3:1518140 | 36              |
| ENST000001 | ABCD2-001      | ATP-binding cassette, sub-family D (ALD), member 2                   | protein_cc | 9606   | 12:395500 | 10              |
| ENST000001 | ABCG5-001      | ATP-binding cassette, sub-family G (WHITE), member 5                 | protein_cc | 9606   | 2:4381247 | 9               |
| ENST000001 | ABCG8-001      | ATP-binding cassette, sub-family G (WHITE), member 8                 | protein_cc | 9606   | 2:4383896 | 7               |
| ENST000001 | ABHD6-002      | abhydrolase domain containing 6                                      | protein_cc | 9606   | 3:5823753 | 19              |
| ENST000001 | AC012074.2-002 |                                                                      | lincRNA    | 9606   | 2:2536913 | 24              |
| ENST000001 | ACADL-001      | acyl-CoA dehydrogenase, long chain                                   | protein_cc | 9606   | 2:2101879 | 6               |
| ENST000001 | ACKR3-001      | atypical chemokine receptor 3                                        | protein_cc | 9606   | 2:2365696 | 39              |
| ENST000001 | ACOT12-001     | acyl-CoA thioesterase 12                                             | protein_cc | 9606   | 5:8133000 | 4               |
| ENST000001 | ACPT-001       | acid phosphatase, testicular                                         | protein_cc | 9606   | 19:507904 | 13              |
| ENST000001 | ACR-001        | acrosin                                                              | protein_cc | 9606   | 22:507381 | 31              |
| ENST000001 | ACSS3-002      | acyl-CoA synthetase short-chain family member 3                      | protein_cc | 9606   | 12:810780 | 10              |
| ENST000001 | ACY3-001       | aspartoacylase (aminocyclase) 3                                      | protein_cc | 9606   | 11:676425 | 2               |
| ENST000001 | ADAD2-004      | adenosine deaminase domain containing 2                              | protein_cc | 9606   | 16:841911 | 12              |
| ENST000001 | ADAMT55-001    | ADAM metalloproteinase with thrombospondin type 1 motif, 5           | protein_cc | 9606   | 21:269179 | 20              |
| ENST000001 | ADH1A-001      | alcohol dehydrogenase 1A (class I), alpha polypeptide                | protein_cc | 9606   | 4:9927636 | 2               |
| ENST000001 | ADH1B-001      | alcohol dehydrogenase 1B (class I), beta polypeptide                 | protein_cc | 9606   | 4:9930496 | 15              |
| ENST000001 | ADORA3-010     | adenosine A3 receptor                                                | protein_cc | 9606   | 1:1114994 | 12              |
| ENST000001 | AFAP1L2-002    | actin filament associated protein 1-like 2                           | protein_cc | 9606   | 10:114294 | 30              |
| ENST000001 | AFF3-201       | AF4/FMR2 family, member 3                                            | protein_cc | 9606   | 2:9954725 | 34              |
| ENST000001 | AFM-001        | afamin                                                               | protein_cc | 9606   | 4:7348168 | 2               |
| ENST000001 | AGAP4-201      | ArfGAP with GTPase domain, ankyrin repeat and PH domain 4            | protein_cc | 9606   | 10:458256 | 9               |
| ENST000001 | AGXT-001       | alanine-glyoxylate aminotransferase                                  | protein_cc | 9606   | 2:2408684 | 2               |
| ENST000001 | AHSG-002       | alpha-2-HS-glycoprotein                                              | protein_cc | 9606   | 3:1866130 | 13              |
| ENST000001 | AIP-001        | aryl hydrocarbon receptor interacting protein                        | protein_cc | 9606   | 11:674830 | 44              |
| ENST000001 | AIRE-001       | autoimmune regulator                                                 | protein_cc | 9606   | 21:442858 | 8               |
| ENST000001 | AK5-004        | adenylate kinase 5                                                   | processed  | 9606   | 1:7728205 | 2               |
| ENST000001 | AK7-001        | adenylate kinase 7                                                   | protein_cc | 9606   | 14:963921 | 32              |
| ENST000001 | AK9-007        | adenylate kinase 9                                                   | protein_cc | 9606   | 6:1096316 | 38              |
| ENST000001 | ALKBH4-001     | alkB, alkylation repair homolog 4 (E. coli)                          | protein_cc | 9606   | 7:1024562 | 3               |
| ENST000001 | ALLC-001       | allantoicase                                                         | protein_cc | 9606   | 2:3658195 | 2               |
| ENST000001 | ALOX15-201     | arachidonate 15-lipoxygenase                                         | protein_cc | 9606   | 17:463092 | 7               |
| ENST000001 | AMBP-001       | alpha-1-microglobulin/bikunin precursor                              | protein_cc | 9606   | 9:1140601 | 8               |
| ENST000001 | AMDHD1-001     | amidohydrolase domain containing 1                                   | protein_cc | 9606   | 12:959432 | 13              |
| ENST000001 | AMH-001        | anti-Mullerian hormone                                               | protein_cc | 9606   | 19:224931 | 35              |
| ENST000001 | AMHR2-001      | anti-Mullerian hormone receptor, type II                             | protein_cc | 9606   | 12:534238 | 5               |
| ENST000001 | AMIGO2-003     | adhesion molecule with Ig-like domain 2                              | protein_cc | 9606   | 12:470757 | 7               |
| ENST000001 | ANGPTL1-001    | angiopoietin-like 1                                                  | protein_cc | 9606   | 1:1788497 | 10              |
| ENST000001 | ANKRD10-004    | ankyrin repeat domain 10                                             | protein_cc | 9606   | 13:110892 | 18              |
| ENST000001 | ANKRD12-001    | ankyrin repeat domain 12                                             | protein_cc | 9606   | 18:913677 | 4               |
| ENST000001 | AP1G2-002      | adaptor-related protein complex 1, gamma 2 subunit                   | protein_cc | 9606   | 14:235595 | 5               |
| ENST000001 | APCS-001       | amyloid P component, serum                                           | protein_cc | 9606   | 1:1595878 | 5               |
| ENST000001 | APLF-001       | aprataxin and PNKP like factor                                       | protein_cc | 9606   | 2:6846756 | 39              |
| ENST000001 | APLNR-001      | apelin receptor                                                      | nonsense   | 9606   | 11:572335 | 15              |
| ENST000001 | APOA5-001      | apolipoprotein A-V                                                   | protein_cc | 9606   | 11:116789 | 7               |
| ENST000001 | APOBEC2-001    | apolipoprotein B mRNA editing enzyme, catalytic polypeptide-like 2   | protein_cc | 9606   | 6:4105330 | 23              |
| ENST000001 | APOC3-001      | apolipoprotein C-III                                                 | protein_cc | 9606   | 11:116829 | 3               |
| ENST000001 | APOE-001       | apolipoprotein E                                                     | protein_cc | 9606   | 19:449057 | 35              |
| ENST000001 | APOH-001       | apolipoprotein H (beta-2-glycoprotein I)                             | protein_cc | 9606   | 17:662120 | 3               |
| ENST000001 | APOL5-001      | apolipoprotein L, 5                                                  | protein_cc | 9606   | 22:357178 | 8               |
| ENST000001 | AQP11-001      | aquaporin 11                                                         | protein_cc | 9606   | 11:775896 | 39              |
| ENST000001 | ARHGEF10L-005  | Rho guanine nucleotide exchange factor (GEF) 10-like                 | nonsense   | 9606   | 1:1762600 | 4               |
| ENST000001 | ARHGEF25-001   | Rho guanine nucleotide exchange factor (GEF) 25                      | protein_cc | 9606   | 12:576114 | 28              |
| ENST000001 | ARL11-001      | ADP-ribosylation factor-like 11                                      | protein_cc | 9606   | 13:496282 | 41              |
| ENST000001 | ARR3-002       | arrestin 3, retinal (X-arrestin)                                     | protein_cc | 9606   | X:7026835 | 12              |
| ENST000001 | ARRDC2-002     | arrestin domain containing 2                                         | protein_cc | 9606   | 19:180081 | 35              |
| ENST000001 | ARRDC4-001     | arrestin domain containing 4                                         | protein_cc | 9606   | 15:979606 | 42              |
| ENST000001 | ASGR2-001      | asialoglycoprotein receptor 2                                        | protein_cc | 9606   | 17:710132 | 3               |
| ENST000001 | ASIC3-005      | acid-sensing (proton-gated) ion channel 3                            | protein_cc | 9606   | 7:1510488 | 9               |
| ENST000001 | ATP10B-004     | ATPase, class V, type 10B                                            | retained_i | 9606   | 5:1606326 | 37              |
| ENST000001 | ATP5F1-001     | ATP synthase, H+ transporting, mitochondrial Fo complex, subunit E   | protein_cc | 9606   | 4:672436  | 41              |
| ENST000001 | ATP8B3-002     | ATPase, aminophospholipid transporter, class I, type 8B, member 3    | protein_cc | 9606   | 19:178207 | 4               |
| ENST000001 | AVPR1A-001     | arginine vasopressin receptor 1A                                     | protein_cc | 9606   | 12:631427 | 21              |
| ENST000001 | AZGP1-001      | alpha-2-glycoprotein 1, zinc-binding                                 | protein_cc | 9606   | 7:9996673 | 8               |
| ENST000001 | B3GALNT2-002   | beta-1,3-N-acetylgalactosaminyltransferase 2                         | protein_cc | 9606   | 1:2354648 | 2               |
| ENST000001 | B3GNT3-001     | UDP-GlcNAc:betaGal beta-1,3-N-acetylglucosaminyltransferase 3        | protein_cc | 9606   | 19:177951 | 8               |
| ENST000001 | B9D2-001       | B9 protein domain 2                                                  | protein_cc | 9606   | 19:413544 | 4               |
| ENST000001 | BAALC-001      | brain and acute leukemia, cytoplasmic                                | protein_cc | 9606   | 8:1031407 | 25              |
| ENST000001 | BAALC-003      | brain and acute leukemia, cytoplasmic                                | protein_cc | 9606   | 8:1031407 | 12              |
| ENST000001 | BAAT-201       | bile acid CoA:amino acid N-acyltransferase                           | protein_cc | 9606   | 9:1013604 | 11              |
| ENST000001 | BATF2-001      | basic leucine zipper transcription factor, ATF-like 2                | protein_cc | 9606   | 11:649879 | 22              |
| ENST000001 | BCAM-001       | basal cell adhesion molecule (Lutheran blood group)                  | protein_cc | 9606   | 19:448091 | 41              |
| ENST000001 | BCHE-001       | butyrylcholinesterase                                                | protein_cc | 9606   | 3:1657729 | 30              |
| ENST000001 | BCL7C-001      | B-cell CLL/lymphoma 7C                                               | protein_cc | 9606   | 16:308877 | 40              |
| ENST000001 | BHMT-001       | betaine-homocysteine S-methyltransferase                             | protein_cc | 9606   | 5:7911177 | 3               |
| ENST000001 | BIK-001        | BCL2-interacting killer (apoptosis-inducing)                         | protein_cc | 9606   | 22:431107 | 38              |
| ENST000001 | BIRC3-002      | baculoviral IAP repeat containing 3                                  | protein_cc | 9606   | 11:102317 | 37              |
| ENST000001 | BMP3-001       | bone morphogenetic protein 3                                         | protein_cc | 9606   | 4:8103096 | 22              |
| ENST000001 | BMPER-001      | BMP binding endothelial regulator                                    | protein_cc | 9606   | 7:3390491 | 34              |
| ENST000001 | BR13-001       | brain protein 13                                                     | protein_cc | 9606   | 7:9828167 | 39              |
| ENST000001 | BRINP1-001     | bone morphogenetic protein/retinoic acid inducible neural-specific 1 | protein_cc | 9606   | 9:1191666 | 15              |
| ENST000001 | BST2-001       | bone marrow stromal cell antigen 2                                   | protein_cc | 9606   | 19:174029 | 44              |
| ENST000001 | BTK-006        | Bruton agammaglobulinemia tyrosine kinase                            | protein_cc | 9606   | X:1013494 | 3               |
| ENST000001 | C11orf52-001   | chromosome 11 open reading frame 52                                  | protein_cc | 9606   | 11:111918 | 26              |
| ENST000001 | C16orf87-001   | chromosome 16 open reading frame 87                                  | protein_cc | 9606   | 16:468020 | 43              |



|                         |                                                                       |             |                |    |
|-------------------------|-----------------------------------------------------------------------|-------------|----------------|----|
| ENST000001C1QB-201      | complement component 1, q subcomponent, B chain                       | protein_cc  | 9606 1:2265318 | 2  |
| ENST000001C1QTNF1-002   | C1q and tumor necrosis factor related protein 1                       | protein_cc  | 9606 17:790242 | 25 |
| ENST000001C1QTNF4-001   | C1q and tumor necrosis factor related protein 4                       | protein_cc  | 9606 11:475896 | 39 |
| ENST000001C20orf197-201 | chromosome 20 open reading frame 197                                  | protein_cc  | 9606 20:600559 | 2  |
| ENST000001C3-001        | complement component 3                                                | protein_cc  | 9606 19:667770 | 24 |
| ENST000001C3AR1-001     | complement component 3a receptor 1                                    | protein_cc  | 9606 12:805830 | 40 |
| ENST000001C5orf63-201   | chromosome 5 open reading frame 63                                    | protein_cc  | 9606 5:1270513 | 9  |
| ENST000001C5orf64-201   | chromosome 5 open reading frame 64                                    | processed   | 9606 5:6168607 | 26 |
| ENST000001C6orf203-001  | chromosome 6 open reading frame 203                                   | protein_cc  | 9606 6:1070282 | 37 |
| ENST000001C7-001        | complement component 7                                                | protein_cc  | 9606 5:4090925 | 36 |
| ENST000001C8G-004       | complement component 8, gamma polypeptide                             | protein_cc  | 9606 9:1369452 | 16 |
| ENST000001C8orf34-004   | chromosome 8 open reading frame 34                                    | protein_cc  | 9606 8:6862545 | 29 |
| ENST000001C8orf4-001    | chromosome 8 open reading frame 4                                     | protein_cc  | 9606 8:4015345 | 43 |
| ENST000001C9orf106-001  | chromosome 9 open reading frame 106                                   | lincRNA     | 9606 9:1293210 | 24 |
| ENST000001CA11-001      | carbonic anhydrase XI                                                 | protein_cc  | 9606 19:486379 | 35 |
| ENST000001CA3-001       | carbonic anhydrase III, muscle specific                               | protein_cc  | 9606 8:8543882 | 13 |
| ENST000001CA5A-001      | carbonic anhydrase VA, mitochondrial                                  | protein_cc  | 9606 16:878815 | 29 |
| ENST000001CADM4-001     | cell adhesion molecule 4                                              | protein_cc  | 9606 19:436223 | 43 |
| ENST000001CALCOCO1-004  | calcium binding and coiled-coil domain 1                              | protein_cc  | 9606 12:537085 | 4  |
| ENST000001CALML3-001    | calmodulin-like 3                                                     | protein_cc  | 9606 10:552400 | 2  |
| ENST000001CAPN6-001     | calpain 6                                                             | protein_cc  | 9606 X:1112451 | 2  |
| ENST000001CAPS-001      | calcyphosine                                                          | protein_cc  | 9606 19:591423 | 3  |
| ENST000001CATIP-001     | ciliogenesis associated TTC17 interacting protein                     | protein_cc  | 9606 2:2183568 | 2  |
| ENST000001CBX8-001      | chromobox homolog 8                                                   | protein_cc  | 9606 17:797921 | 43 |
| ENST000001CCDC116-001   | coiled-coil domain containing 116                                     | protein_cc  | 9606 22:216327 | 29 |
| ENST000001CCDC184-001   | coiled-coil domain containing 184                                     | protein_cc  | 9606 12:481835 | 42 |
| ENST000001CCDC58-001    | coiled-coil domain containing 58                                      | protein_cc  | 9606 3:1223595 | 37 |
| ENST000001CCDC8-001     | coiled-coil domain containing 8                                       | protein_cc  | 9606 19:464103 | 41 |
| ENST000001CCDC85B-001   | coiled-coil domain containing 85B                                     | protein_cc  | 9606 11:665901 | 44 |
| ENST000001CCL21-002     | chemokine (C-C motif) ligand 21                                       | protein_cc  | 9606 9:3470900 | 22 |
| ENST000001CCNF-002      | cyclin F                                                              | nonsense    | 9606 16:242939 | 16 |
| ENST000001CCNL1-001     | cyclin L1                                                             | protein_cc  | 9606 3:1571475 | 26 |
| ENST000001CCR1-001      | chemokine (C-C motif) receptor 1                                      | protein_cc  | 9606 3:4620170 | 2  |
| ENST000001CCR7-001      | chemokine (C-C motif) receptor 7                                      | protein_cc  | 9606 17:405537 | 12 |
| ENST000001CCS-009       | copper chaperone for superoxide dismutase                             | protein_cc  | 9606 11:665932 | 23 |
| ENST000001CD101-201     | CD101 molecule                                                        | protein_cc  | 9606 1:1170017 | 23 |
| ENST000001CD180-001     | CD180 molecule                                                        | protein_cc  | 9606 5:6718227 | 16 |
| ENST000001CD200R1-001   | CD200 receptor 1                                                      | protein_cc  | 9606 3:1129226 | 5  |
| ENST000001CD209-001     | CD209 molecule                                                        | protein_cc  | 9606 19:773999 | 20 |
| ENST000001CD22-002      | CD22 molecule                                                         | protein_cc  | 9606 19:353291 | 2  |
| ENST000001CD3D-001      | CD3d molecule, delta (CD3-TCR complex)                                | protein_cc  | 9606 11:118338 | 3  |
| ENST000001CD69-001      | CD69 molecule                                                         | protein_cc  | 9606 12:975248 | 32 |
| ENST000001CD7-001       | CD7 molecule                                                          | protein_cc  | 9606 17:823148 | 13 |
| ENST000001CD79A-001     | CD79a molecule, immunoglobulin-associated alpha                       | protein_cc  | 9606 19:418771 | 33 |
| ENST000001CD97-003      | CD97 molecule                                                         | protein_cc  | 9606 19:143814 | 6  |
| ENST000001CDH19-001     | cadherin 19, type 2                                                   | protein_cc  | 9606 18:665010 | 5  |
| ENST000001CDH3-001      | cadherin 3, type 1, P-cadherin (placental)                            | protein_cc  | 9606 16:686448 | 27 |
| ENST000001CDH6-001      | cadherin 6, type 2, K-cadherin (fetal kidney)                         | protein_cc  | 9606 5:3119375 | 33 |
| ENST000001CDKN2C-001    | cyclin-dependent kinase inhibitor 2C (p18, inhibits CDK4)             | protein_cc  | 9606 1:5096074 | 5  |
| ENST000001CEACAM8-001   | carcinoembryonic antigen-related cell adhesion molecule 8             | protein_cc  | 9606 19:425802 | 25 |
| ENST000001CEBPB-001     | CCAAT/enhancer binding protein (C/EBP), beta                          | protein_cc  | 9606 20:501907 | 37 |
| ENST000001CEBPE-001     | CCAAT/enhancer binding protein (C/EBP), epsilon                       | protein_cc  | 9606 14:231173 | 8  |
| ENST000001CELA3A-001    | chymotrypsin-like elastase family, member 3A                          | protein_cc  | 9606 1:2200165 | 16 |
| ENST000001CEP120-201    | centrosomal protein 120kDa                                            | protein_cc  | 9606 5:1233448 | 9  |
| ENST000001CEP135-001    | centrosomal protein 135kDa                                            | protein_cc  | 9606 4:5594898 | 36 |
| ENST000001CEP44-201     | centrosomal protein 44kDa                                             | protein_cc  | 9606 4:1742990 | 15 |
| ENST000001CERS3-001     | ceramide synthase 3                                                   | protein_cc  | 9606 15:100400 | 2  |
| ENST000001CFAP43-003    | cilia and flagella associated protein 43                              | protein_cc  | 9606 10:104167 | 14 |
| ENST000001CFHR1-001     | complement factor H-related 1                                         | protein_cc  | 9606 1:1968197 | 8  |
| ENST000001CFHR4-002     | complement factor H-related 4                                         | protein_cc  | 9606 1:1968880 | 2  |
| ENST000001CHD5-001      | chromodomain helicase DNA binding protein 5                           | protein_cc  | 9606 1:6101793 | 21 |
| ENST000001CHD9-019      | chromodomain helicase DNA binding protein 9                           | retained_li | 9606 16:532351 | 38 |
| ENST000001CHID1-001     | chitinase domain containing 1                                         | protein_cc  | 9606 11:868396 | 5  |
| ENST000001CHKA-001      | choline kinase alpha                                                  | protein_cc  | 9606 11:680528 | 19 |
| ENST000001CHRNA9-001    | cholinergic receptor, nicotinic, alpha 9 (neuronal)                   | protein_cc  | 9606 4:4033532 | 11 |
| ENST000001CHST12-002    | carbohydrate (chondroitin 4) sulfotransferase 12                      | protein_cc  | 9606 7:2403588 | 43 |
| ENST000001CHST13-001    | carbohydrate (chondroitin 4) sulfotransferase 13                      | protein_cc  | 9606 3:1265242 | 11 |
| ENST000001CILP-001      | cartilage intermediate layer protein, nucleotide pyrophosphohydrolase | protein_cc  | 9606 15:651947 | 14 |
| ENST000001CIT-001       | citron rho-interacting serine/threonine kinase                        | protein_cc  | 9606 12:119685 | 3  |
| ENST000001CLCA3P-002    | chloride channel accessory 3, pseudogene                              | processed   | 9606 1:8663427 | 7  |
| ENST000001CLDN19-001    | claudin 19                                                            | protein_cc  | 9606 1:4273309 | 17 |
| ENST000001CLEC10A-001   | C-type lectin domain family 10, member A                              | protein_cc  | 9606 17:707453 | 13 |
| ENST000001CLEC11A-001   | C-type lectin domain family 11, member A                              | protein_cc  | 9606 19:507233 | 39 |
| ENST000001CLEC16A-005   | C-type lectin domain family 16, member A                              | protein_cc  | 9606 16:111239 | 12 |
| ENST000001CLEC1B-005    | C-type lectin domain family 1, member B                               | protein_cc  | 9606 12:999306 | 4  |
| ENST000001CLEC2B-001    | C-type lectin domain family 2, member B                               | protein_cc  | 9606 12:985298 | 36 |
| ENST000001CLEC3B-001    | C-type lectin domain family 3, member B                               | protein_cc  | 9606 3:4502618 | 6  |
| ENST000001CLEC4F-001    | C-type lectin domain family 4, member F                               | protein_cc  | 9606 2:7080864 | 5  |
| ENST000001CLEC4M-201    | C-type lectin domain family 4, member M                               | protein_cc  | 9606 19:776314 | 10 |
| ENST000001CLK4-001      | CDC-like kinase 4                                                     | protein_cc  | 9606 5:1786026 | 26 |
| ENST000001CMKLR1-001    | chemokine-like receptor 1                                             | protein_cc  | 9606 12:108288 | 12 |
| ENST000001CMTM8-001     | CKLF-like MARVEL transmembrane domain containing 8                    | protein_cc  | 9606 3:3223867 | 41 |
| ENST000001CNFN-001      | cornifelin                                                            | protein_cc  | 9606 19:423870 | 34 |
| ENST000001CNOT1-201     | CCR4-NOT transcription complex, subunit 1                             | protein_cc  | 9606 16:585199 | 9  |
| ENST000001CNPY4-001     | canopy FGF signaling regulator 4                                      | protein_cc  | 9606 7:1001196 | 22 |
| ENST000001COL10A1-201   | collagen, type X, alpha 1                                             | protein_cc  | 9606 6:1161189 | 8  |
| ENST000001COL3A1-001    | collagen, type III, alpha 1                                           | protein_cc  | 9606 2:1889743 | 41 |

|                            |                                                                          |            |      |           |    |
|----------------------------|--------------------------------------------------------------------------|------------|------|-----------|----|
| ENST000001COL6A2-001       | collagen, type VI, alpha 2                                               | protein_cc | 9606 | 21:460980 | 40 |
| ENST000001CORO1A-001       | coronin, actin binding protein, 1A                                       | protein_cc | 9606 | 16:301834 | 25 |
| ENST000001COX17-001        | COX17 cytochrome c oxidase copper chaperone                              | protein_cc | 9606 | 3:1196692 | 41 |
| ENST000001COX7A1-001       | cytochrome c oxidase subunit VIIa polypeptide 1 (muscle)                 | protein_cc | 9606 | 19:361509 | 42 |
| ENST000001CPB2-001         | carboxypeptidase B2 (plasma)                                             | protein_cc | 9606 | 13:460531 | 2  |
| ENST000001CPLX4-001        | complexin 4                                                              | protein_cc | 9606 | 18:592954 | 4  |
| ENST000001CPN2-001         | carboxypeptidase N, polypeptide 2                                        | protein_cc | 9606 | 3:1943397 | 11 |
| ENST000001CPNE3-201        | copine III                                                               | protein_cc | 9606 | 8:8648483 | 3  |
| ENST000001CPO-001          | carboxypeptidase O                                                       | protein_cc | 9606 | 2:2069395 | 17 |
| ENST000001CPZ-001          | carboxypeptidase Z                                                       | protein_cc | 9606 | 4:8592756 | 9  |
| ENST000001CR1L-001         | complement component (3b/4b) receptor 1-like                             | nonsense_  | 9606 | 1:2076774 | 3  |
| ENST000001CRHBP-001        | corticotropin releasing hormone binding protein                          | protein_cc | 9606 | 5:7695271 | 20 |
| ENST000001CRIPAK-001       | cysteine-rich PAK1 inhibitor                                             | protein_cc | 9606 | 4:1391552 | 38 |
| ENST000001CRTC2-009        | CREB regulated transcription coactivator 2                               | nonsense_  | 9606 | 1:1539476 | 5  |
| ENST000001CSNK1D-001       | casein kinase 1, delta                                                   | protein_cc | 9606 | 17:822426 | 19 |
| ENST000001CSPP1-001        | centrosome and spindle pole associated protein 1                         | protein_cc | 9606 | 8:6706436 | 10 |
| ENST000001CSTA-001         | cystatin A (stefin A)                                                    | protein_cc | 9606 | 3:1223252 | 5  |
| ENST000001CTS5-002         | cancer/testis antigen 55                                                 | protein_cc | 9606 | X:1351565 | 7  |
| ENST000001CTD-2369P2.2-002 |                                                                          | lincRNA    | 9606 | 19:102214 | 44 |
| ENST000001CTLA4-001        | cytotoxic T-lymphocyte-associated protein 4                              | protein_cc | 9606 | 2:2038677 | 4  |
| ENST000001CTSH-001         | cathepsin H                                                              | protein_cc | 9606 | 15:789210 | 19 |
| ENST000001CUL3-001         | cullin 3                                                                 | protein_cc | 9606 | 2:2244701 | 15 |
| ENST000001CUL4A-201        | cullin 4A                                                                | protein_cc | 9606 | 13:113208 | 4  |
| ENST000001CUX2-001         | cut-like homeobox 2                                                      | protein_cc | 9606 | 12:111034 | 22 |
| ENST000001CXCL13-001       | chemokine (C-X-C motif) ligand 13                                        | protein_cc | 9606 | 4:7751175 | 3  |
| ENST000001CXCL3-001        | chemokine (C-X-C motif) ligand 3                                         | protein_cc | 9606 | 4:7403658 | 38 |
| ENST000001CXCL9-001        | chemokine (C-X-C motif) ligand 9                                         | protein_cc | 9606 | 4:7600127 | 6  |
| ENST000001CXXC5-001        | CXXC finger protein 5                                                    | protein_cc | 9606 | 5:1396482 | 35 |
| ENST000001CYB5A-006        | cytochrome b5 type A (microsomal)                                        | protein_cc | 9606 | 18:742532 | 33 |
| ENST000001CYBA-001         | cytochrome b-245, alpha polypeptide                                      | protein_cc | 9606 | 16:886432 | 43 |
| ENST000001CYP2A7-201       | cytochrome P450, family 2, subfamily A, polypeptide 7                    | protein_cc | 9606 | 19:408754 | 7  |
| ENST000001CYP2C18-001      | cytochrome P450, family 2, subfamily C, polypeptide 18                   | protein_cc | 9606 | 10:946836 | 4  |
| ENST000001CYP2C9-001       | cytochrome P450, family 2, subfamily C, polypeptide 9                    | protein_cc | 9606 | 10:949386 | 2  |
| ENST000001CYP2E1-201       | cytochrome P450, family 2, subfamily E, polypeptide 1                    | protein_cc | 9606 | 10:133527 | 9  |
| ENST000001CYP2W1-001       | cytochrome P450, family 2, subfamily W, polypeptide 1                    | protein_cc | 9606 | 7:983199  | 14 |
| ENST000001CYP3A5-001       | cytochrome P450, family 3, subfamily A, polypeptide 5                    | protein_cc | 9606 | 7:9964819 | 2  |
| ENST000001CYP7A1-001       | cytochrome P450, family 7, subfamily A, polypeptide 1                    | protein_cc | 9606 | 8:5849017 | 12 |
| ENST000001CYP7B1-001       | cytochrome P450, family 7, subfamily B, polypeptide 1                    | protein_cc | 9606 | 8:6459613 | 6  |
| ENST000001CYSLTR2-001      | cysteinyl leukotriene receptor 2                                         | protein_cc | 9606 | 13:487065 | 21 |
| ENST000001CYTIP-001        | cytohesin 1 interacting protein                                          | protein_cc | 9606 | 2:1574146 | 6  |
| ENST000001DAAM2-001        | dishevelled associated activator of morphogenesis 2                      | protein_cc | 9606 | 6:3979236 | 4  |
| ENST000001DAPP1-001        | dual adaptor of phosphotyrosine and 3-phosphoinositides                  | protein_cc | 9606 | 4:9981683 | 15 |
| ENST000001DCAF4L2-001      | DDB1 and CUL4 associated factor 4-like 2                                 | protein_cc | 9606 | 8:8787074 | 4  |
| ENST000001DCDC1-005        | doublecortin domain containing 1                                         | nonsense_  | 9606 | 11:308636 | 13 |
| ENST000001DDTL-001         | D-dopachrome tautomerase-like                                            | protein_cc | 9606 | 22:239669 | 11 |
| ENST000001DEF6-001         | differentially expressed in FDPC 6 homolog (mouse)                       | protein_cc | 9606 | 6:3529785 | 41 |
| ENST000001DEPDC7-001       | DEP domain containing 7                                                  | protein_cc | 9606 | 11:330158 | 28 |
| ENST000001DEPTOR-001       | DEP domain containing MTOR-interacting protein                           | protein_cc | 9606 | 8:1198737 | 33 |
| ENST000001DFNB31-001       | deafness, autosomal recessive 31                                         | protein_cc | 9606 | 9:1144020 | 27 |
| ENST000001DHDH-001         | dihydrodiol dehydrogenase (dimeric)                                      | protein_cc | 9606 | 19:489336 | 4  |
| ENST000001DLGAP3-201       | discs, large (Drosophila) homolog-associated protein 3                   | protein_cc | 9606 | 1:3486543 | 39 |
| ENST000001DLL4-001         | delta-like 4 (Drosophila)                                                | protein_cc | 9606 | 15:409293 | 41 |
| ENST000001DNAH6-001        | dynein, axonemal, heavy chain 6                                          | protein_cc | 9606 | 2:8451781 | 21 |
| ENST000001DNAI2-001        | dynein, axonemal, intermediate chain 2                                   | protein_cc | 9606 | 17:742742 | 2  |
| ENST000001DNAJC18-001      | DnaJ (Hsp40) homolog, subfamily C, member 18                             | protein_cc | 9606 | 5:1394102 | 7  |
| ENST000001DNAJC7-003       | DnaJ (Hsp40) homolog, subfamily C, member 7                              | protein_cc | 9606 | 17:419766 | 4  |
| ENST000001DPM2-001         | dolichyl-phosphate mannosyltransferase polypeptide 2, regulatory subunit | protein_cc | 9606 | 9:1279350 | 29 |
| ENST000001DRD4-001         | dopamine receptor D4                                                     | protein_cc | 9606 | 11:637293 | 27 |
| ENST000001DSC2-001         | desmocollin 2                                                            | protein_cc | 9606 | 18:310588 | 26 |
| ENST000001DSC2-002         | desmocollin 2                                                            | protein_cc | 9606 | 18:310659 | 10 |
| ENST000001DSCAML1-001      | Down syndrome cell adhesion molecule like 1                              | protein_cc | 9606 | 11:117427 | 7  |
| ENST000001DSG1-001         | desmoglein 1                                                             | protein_cc | 9606 | 18:313180 | 2  |
| ENST000001DSG2-001         | desmoglein 2                                                             | protein_cc | 9606 | 18:314980 | 40 |
| ENST000001DTX1-001         | deltex 1, E3 ubiquitin ligase                                            | protein_cc | 9606 | 12:113057 | 24 |
| ENST000001DUS1L-001        | dihydrouridine synthase 1-like (S. cerevisiae)                           | protein_cc | 9606 | 17:820575 | 26 |
| ENST000001DUSP1-001        | dual specificity phosphatase 1                                           | protein_cc | 9606 | 5:1727680 | 43 |
| ENST000001DUSP2-001        | dual specificity phosphatase 2                                           | protein_cc | 9606 | 2:9614316 | 36 |
| ENST000001DUSP26-001       | dual specificity phosphatase 26 (putative)                               | protein_cc | 9606 | 8:3359133 | 11 |
| ENST000001DVL2-001         | dishevelled segment polarity protein 2                                   | protein_cc | 9606 | 17:722534 | 41 |
| ENST000001EAF2-001         | ELL associated factor 2                                                  | protein_cc | 9606 | 3:1218352 | 29 |
| ENST000001EBI3-001         | Epstein-Barr virus induced 3                                             | protein_cc | 9606 | 19:422949 | 41 |
| ENST000001ECI1-001         | enoyl-CoA delta isomerase 1                                              | protein_cc | 9606 | 16:223939 | 18 |
| ENST000001EED-003          | embryonic ectoderm development                                           | protein_cc | 9606 | 11:862451 | 8  |
| ENST000001EEF1B2-001       | eukaryotic translation elongation factor 1 beta 2                        | protein_cc | 9606 | 2:2061595 | 7  |
| ENST000001EFCAB1-001       | EF-hand calcium binding domain 1                                         | protein_cc | 9606 | 8:4872340 | 6  |
| ENST000001EFS-003          | embryonal Fyn-associated substrate                                       | protein_cc | 9606 | 14:233564 | 9  |
| ENST000001EGLN3-001        | egl-9 family hypoxia-inducible factor 3                                  | protein_cc | 9606 | 14:339242 | 32 |
| ENST000001EGR1-001         | early growth response 1                                                  | protein_cc | 9606 | 5:1384654 | 43 |
| ENST000001EGR2-001         | early growth response 2                                                  | protein_cc | 9606 | 10:628119 | 18 |
| ENST000001EHD3-001         | EH-domain containing 3                                                   | protein_cc | 9606 | 2:3123433 | 39 |
| ENST000001ELOF1-201        | elongation factor 1 homolog (S. cerevisiae)                              | protein_cc | 9606 | 19:115530 | 44 |
| ENST000001EMC2-001         | ER membrane protein complex subunit 2                                    | protein_cc | 9606 | 8:1084436 | 40 |
| ENST000001EMC6-001         | ER membrane protein complex subunit 6                                    | protein_cc | 9606 | 17:366881 | 16 |
| ENST000001EN2-001          | engrailed homeobox 2                                                     | protein_cc | 9606 | 7:1554581 | 19 |
| ENST000001ENGASE-003       | endo-beta-N-acetylglucosaminidase                                        | nonsense_  | 9606 | 17:790803 | 31 |
| ENST000001ENKD1-001        | enkurin domain containing 1                                              | protein_cc | 9606 | 16:676629 | 43 |
| ENST000001ENPEP-001        | glutamyl aminopeptidase (aminopeptidase A)                               | protein_cc | 9606 | 4:1104760 | 22 |

|                         |                                                                                          |            |                 |    |
|-------------------------|------------------------------------------------------------------------------------------|------------|-----------------|----|
| ENST000001E0MES-001     | eomesodermin                                                                             | protein_cc | 9606 3:2771594  | 5  |
| ENST000001EPCAM-001     | epithelial cell adhesion molecule                                                        | protein_cc | 9606 2:4736914  | 26 |
| ENST000001EPO-001       | erythropoietin                                                                           | protein_cc | 9606 7:1007208  | 15 |
| ENST000001EPST11-001    | epithelial stromal interaction 1 (breast)                                                | protein_cc | 9606 13:428863  | 34 |
| ENST000001EREG-001      | epiregulin                                                                               | protein_cc | 9606 4:7436514  | 32 |
| ENST000001ERICHS-001    | glutamate-rich 5                                                                         | protein_cc | 9606 8:9806431  | 26 |
| ENST000001ERICHE-001    | glutamate-rich 6                                                                         | protein_cc | 9606 3:1506598  | 7  |
| ENST000001EXOC3L1-001   | exocyst complex component 3-like 1                                                       | protein_cc | 9606 16:671843  | 38 |
| ENST000001EXPH5-001     | exophilin 5                                                                              | protein_cc | 9606 11:108505  | 31 |
| ENST000001F2-001        | coagulation factor II (thrombin)                                                         | protein_cc | 9606 11:467191  | 5  |
| ENST000001F2RL3-001     | coagulation factor II (thrombin) receptor-like 3                                         | protein_cc | 9606 19:168888  | 35 |
| ENST000001F9-001        | coagulation factor IX                                                                    | protein_cc | 9606 X:1395307  | 2  |
| ENST000001FABP1-001     | fatty acid binding protein 1, liver                                                      | protein_cc | 9606 2:8812298  | 2  |
| ENST000001FAHD2A-001    | fumarylacetoacetate hydrolase domain containing 2A                                       | protein_cc | 9606 2:9540272  | 33 |
| ENST000001FAM105A-001   | family with sequence similarity 105, member A                                            | protein_cc | 9606 5:1458177  | 40 |
| ENST000001FAM170B-001   | family with sequence similarity 170, member B                                            | protein_cc | 9606 10:491311  | 2  |
| ENST000001FAM177A1-001  | family with sequence similarity 177, member A1                                           | protein_cc | 9606 14:350464  | 10 |
| ENST000001FAM187B-001   | family with sequence similarity 187, member B                                            | protein_cc | 9606 19:352248  | 4  |
| ENST000001FAM189A1-001  | family with sequence similarity 189, member A1                                           | protein_cc | 9606 15:291202  | 29 |
| ENST000001FAM71A-001    | family with sequence similarity 71, member A                                             | protein_cc | 9606 1:2126244  | 18 |
| ENST000001FAM83B-001    | family with sequence similarity 83, member B                                             | protein_cc | 9606 6:5484677  | 5  |
| ENST000001FAM83E-001    | family with sequence similarity 83, member E                                             | protein_cc | 9606 19:486008  | 34 |
| ENST000001FAM84A-001    | family with sequence similarity 84, member A                                             | protein_cc | 9606 2:1463268  | 12 |
| ENST000001FAM86B3P-005  | family with sequence similarity 86, member B3, pseudogene                                | processed, | 9606 8:8240369  | 28 |
| ENST000001FAM89B-001    | family with sequence similarity 89, member B                                             | protein_cc | 9606 11:655723  | 4  |
| ENST000001FBLN5-002     | fibulin 5                                                                                | protein_cc | 9606 14:918694  | 6  |
| ENST000001FBXO25-003    | F-box protein 25                                                                         | protein_cc | 9606 8:413072-4 | 6  |
| ENST000001FBXO9-002     | F-box protein 9                                                                          | protein_cc | 9606 6:5307085  | 2  |
| ENST000001FCER1G-001    | Fc fragment of IgE, high affinity I, receptor for; gamma polypeptide                     | protein_cc | 9606 1:1612152  | 25 |
| ENST000001FCN3-001      | ficolin (collagen/fibrinogen domain containing) 3                                        | protein_cc | 9606 1:2736911  | 17 |
| ENST000001FGA-002       | fibrinogen alpha chain                                                                   | protein_cc | 9606 4:1545831  | 2  |
| ENST000001FGB-001       | fibrinogen beta chain                                                                    | protein_cc | 9606 4:1545629  | 2  |
| ENST000001FGF10-001     | fibroblast growth factor 10                                                              | protein_cc | 9606 5:4430354  | 5  |
| ENST000001FGF18-001     | fibroblast growth factor 18                                                              | protein_cc | 9606 5:1714196  | 32 |
| ENST000001FGF19-001     | fibroblast growth factor 19                                                              | protein_cc | 9606 11:696982  | 11 |
| ENST000001FGF20-001     | fibroblast growth factor 20                                                              | protein_cc | 9606 8:1699216  | 12 |
| ENST000001FGF21-201     | fibroblast growth factor 21                                                              | protein_cc | 9606 19:487560  | 3  |
| ENST000001FGF23-001     | fibroblast growth factor 23                                                              | protein_cc | 9606 12:436822  | 20 |
| ENST000001FGFBP3-001    | fibroblast growth factor binding protein 3                                               | protein_cc | 9606 10:919065  | 42 |
| ENST000001FGFR1OP2-004  | FGFR1 oncogene partner 2                                                                 | protein_cc | 9606 12:269385  | 19 |
| ENST000001FGFR4-001     | fibroblast growth factor receptor 4                                                      | protein_cc | 9606 5:1770868  | 26 |
| ENST000001FGL2-001      | fibrinogen-like 2                                                                        | protein_cc | 9606 7:7719337  | 29 |
| ENST000001FHDC1-201     | FH2 domain containing 1                                                                  | protein_cc | 9606 4:1529429  | 31 |
| ENST000001FIBIN-001     | fin bud initiation factor homolog (zebrafish)                                            | protein_cc | 9606 11:269941  | 5  |
| ENST000001FIGF-001      | c-fos induced growth factor (vascular endothelial growth factor D)                       | protein_cc | 9606 X:1534559  | 38 |
| ENST000001FILIP1-001    | filamin A interacting protein 1                                                          | protein_cc | 9606 6:7530808  | 11 |
| ENST000001FIZ1-001      | FLT3-interacting zinc finger 1                                                           | protein_cc | 9606 19:555913  | 36 |
| ENST000001FKBP2-003     | FK506 binding protein 2, 13kDa                                                           | protein_cc | 9606 11:642410  | 43 |
| ENST000001FKRP-001      | fukutin related protein                                                                  | protein_cc | 9606 19:467460  | 14 |
| ENST000001FLJ34503-001  | uncharacterized FLJ34503                                                                 | antisense  | 9606 6:1139041  | 25 |
| ENST000001FLJ40194-001  | uncharacterized FLJ40194                                                                 | lincRNA    | 9606 17:492482  | 30 |
| ENST000001FLYWCH2-002   | FLYWCH family member 2                                                                   | protein_cc | 9606 16:288321  | 9  |
| ENST000001FMO6P-003     | flavin containing monoxygenase 6 pseudogene                                              | protein_cc | 9606 1:1711381  | 2  |
| ENST000001FOS-001       | FBJ murine osteosarcoma viral oncogene homolog                                           | protein_cc | 9606 14:752787  | 38 |
| ENST000001FOX4L1-001    | forkhead box D4-like 1                                                                   | protein_cc | 9606 2:1134986  | 29 |
| ENST000001FOXJ1-001     | forkhead box J1                                                                          | protein_cc | 9606 17:761363  | 9  |
| ENST000001FOXQ1-001     | forkhead box Q1                                                                          | protein_cc | 9606 6:1312473  | 8  |
| ENST000001FPR1-001      | formyl peptide receptor 1                                                                | protein_cc | 9606 19:517451  | 18 |
| ENST000001FRG2C-001     | FSHD region gene 2 family, member C                                                      | protein_cc | 9606 3:7566433  | 7  |
| ENST000001FRZB-001      | frizzled-related protein                                                                 | protein_cc | 9606 2:1828332  | 27 |
| ENST000001FZD3-001      | frizzled class receptor 3                                                                | protein_cc | 9606 8:2849425  | 41 |
| ENST000001GABARAPL1-001 | GABA(A) receptor-associated protein like 1                                               | protein_cc | 9606 12:102128  | 37 |
| ENST000001GABRB3-002    | gamma-aminobutyric acid (GABA) A receptor, beta 3                                        | protein_cc | 9606 15:265435  | 15 |
| ENST000001GABRP-201     | gamma-aminobutyric acid (GABA) A receptor, pi                                            | protein_cc | 9606 5:1707837  | 12 |
| ENST000001GADD45G-001   | growth arrest and DNA-damage-inducible, gamma                                            | protein_cc | 9606 9:8960501  | 39 |
| ENST000001GAL3ST2-001   | galactose-3-O-sulfotransferase 2                                                         | protein_cc | 9606 2:2417768  | 11 |
| ENST000001GALNT18-001   | polypeptide N-acetylgalactosaminyltransferase 18                                         | protein_cc | 9606 11:112708  | 43 |
| ENST000001GAMT-001      | guanidinoacetate N-methyltransferase                                                     | protein_cc | 9606 19:139708  | 44 |
| ENST000001GAP43-001     | growth associated protein 43                                                             | protein_cc | 9606 3:1156233  | 13 |
| ENST000001GAS1-001      | growth arrest-specific 1                                                                 | protein_cc | 9606 9:8694436  | 37 |
| ENST000001GATA5-001     | GATA binding protein 5                                                                   | protein_cc | 9606 20:624634  | 16 |
| ENST000001GCA-003       | granulosa cell calcium binding protein                                                   | protein_cc | 9606 2:1623443  | 24 |
| ENST000001GCNT4-001     | glucosaminyl (N-acetyl) transferase 4, core 2                                            | protein_cc | 9606 5:7502534  | 27 |
| ENST000001GDF7-001      | growth differentiation factor 7                                                          | protein_cc | 9606 2:2066666  | 32 |
| ENST000001GEM-001       | GTP binding protein overexpressed in skeletal muscle                                     | protein_cc | 9606 8:9424925  | 24 |
| ENST000001GFRA2-002     | GDNF family receptor alpha 2                                                             | nonsense_  | 9606 8:2169201  | 8  |
| ENST000001GGT6-001      | gamma-glutamyltransferase 6                                                              | protein_cc | 9606 17:455692  | 14 |
| ENST000001GIGYF1-001    | GRB10 interacting GYF protein 1                                                          | protein_cc | 9606 7:1006795  | 40 |
| ENST000001GIMAP4-001    | GTPase, IMAP family member 4                                                             | protein_cc | 9606 7:1505672  | 40 |
| ENST000001GIPC3-001     | GIPC PDZ domain containing family, member 3                                              | protein_cc | 9606 19:358555  | 42 |
| ENST000001GJC3-001      | gap junction protein, gamma 3, 30.2kDa                                                   | protein_cc | 9606 7:9992326  | 37 |
| ENST000001GLP2R-001     | glucagon-like peptide 2 receptor                                                         | protein_cc | 9606 17:982555  | 3  |
| ENST000001GLTSCR2-001   | glioma tumor suppressor candidate region gene 2                                          | protein_cc | 9606 19:477455  | 43 |
| ENST000001GNAO1-001     | guanine nucleotide binding protein (G protein), alpha activating activity polypeptide O  | protein_cc | 9606 16:561913  | 22 |
| ENST000001GNAT1-001     | guanine nucleotide binding protein (G protein), alpha transducing activity polypeptide 1 | protein_cc | 9606 3:5019161  | 26 |
| ENST000001GNG8-001      | guanine nucleotide binding protein (G protein), gamma 8                                  | protein_cc | 9606 19:466340  | 11 |
| ENST000001GOLT1A-001    | golgi transport 1A                                                                       | protein_cc | 9606 1:2041981  | 21 |

|                         |                                                                                   |            |                |    |
|-------------------------|-----------------------------------------------------------------------------------|------------|----------------|----|
| ENST000001GP9-001       | glycoprotein IX (platelet)                                                        | protein_cc | 9606 3:1290607 | 9  |
| ENST000001GPATCH11-001  | G patch domain containing 11                                                      | protein_cc | 9606 2:3708451 | 3  |
| ENST000001GPR137C-001   | G protein-coupled receptor 137C                                                   | protein_cc | 9606 14:525531 | 40 |
| ENST000001GPR182-001    | G protein-coupled receptor 182                                                    | protein_cc | 9606 12:569944 | 29 |
| ENST000001GPR82-001     | G protein-coupled receptor 82                                                     | protein_cc | 9606 X:4172415 | 32 |
| ENST000001GPR83-001     | G protein-coupled receptor 83                                                     | protein_cc | 9606 11:943773 | 34 |
| ENST000001GPR84-001     | G protein-coupled receptor 84                                                     | protein_cc | 9606 12:543624 | 14 |
| ENST000001GPSM1-003     | G-protein signaling modulator 1                                                   | protein_cc | 9606 9:1363555 | 8  |
| ENST000001GRHL1-001     | grainyhead-like 1 (Drosophila)                                                    | protein_cc | 9606 2:9951698 | 32 |
| ENST000001GRHL2-001     | grainyhead-like 2 (Drosophila)                                                    | protein_cc | 9606 8:1014924 | 7  |
| ENST000001GSC-001       | goosecoid homeobox                                                                | protein_cc | 9606 14:947682 | 8  |
| ENST000001GUCA1B-001    | guanylate cyclase activator 1B (retina)                                           | protein_cc | 9606 6:4218440 | 38 |
| ENST000001GYS2-001      | glycogen synthase 2 (liver)                                                       | protein_cc | 9606 12:215361 | 17 |
| ENST000001GZMM-001      | granzyme M (lymphocyte met-ase 1)                                                 | protein_cc | 9606 19:544035 | 22 |
| ENST000001HAMP-002      | hepcidin antimicrobial peptide                                                    | protein_cc | 9606 19:352823 | 4  |
| ENST000001HAS2-001      | hyaluronan synthase 2                                                             | protein_cc | 9606 8:1216121 | 37 |
| ENST000001HDHD3-001     | haloacid dehalogenase-like hydrolase domain containing 3                          | protein_cc | 9606 9:1133734 | 39 |
| ENST000001HERC5-001     | HECT and RLD domain containing E3 ubiquitin protein ligase 5                      | protein_cc | 9606 4:8845711 | 33 |
| ENST000001HERC6-201     | HECT and RLD domain containing E3 ubiquitin protein ligase family member 6        | protein_cc | 9606 4:8837873 | 6  |
| ENST000001HES1-001      | hes family bHLH transcription factor 1                                            | protein_cc | 9606 3:1941361 | 43 |
| ENST000001HES4-001      | hes family bHLH transcription factor 4                                            | protein_cc | 9606 1:998964  | 38 |
| ENST000001HGD-001       | homogentisate 1,2-dioxygenase                                                     | protein_cc | 9606 3:1206281 | 7  |
| ENST000001HIGD2A-001    | HIG1 hypoxia inducible domain family, member 2A                                   | protein_cc | 9606 5:1763887 | 40 |
| ENST000001HIST1H2AC-001 | histone cluster 1, H2ac                                                           | nonsense_  | 9606 6:2612414 | 14 |
| ENST000001HIST1H2BC-003 | histone cluster 1, H2bc                                                           | protein_cc | 9606 6:2611487 | 28 |
| ENST000001HK3-001       | hexokinase 3 (white cell)                                                         | protein_cc | 9606 5:1768808 | 7  |
| ENST000001HLA-DOA-001   | major histocompatibility complex, class II, DO alpha                              | protein_cc | 9606 6:3300417 | 23 |
| ENST000001HMGCL-010     | 3-hydroxymethyl-3-methylglutaryl-CoA lyase                                        | protein_cc | 9606 1:2380191 | 3  |
| ENST000001HMGN1-004     | high mobility group nucleosome binding domain 1                                   | nonsense_  | 9606 21:393423 | 2  |
| ENST000001HMGN3-002     | high mobility group nucleosomal binding domain 3                                  | protein_cc | 9606 6:7920124 | 38 |
| ENST000001HOXA5-001     | homeobox A5                                                                       | protein_cc | 9606 7:2714105 | 41 |
| ENST000001HPD-002       | 4-hydroxyphenylpyruvate dioxygenase                                               | protein_cc | 9606 12:121839 | 17 |
| ENST000001HPN-002       | hepsin                                                                            | protein_cc | 9606 19:350405 | 19 |
| ENST000001HPX-001       | hemopexin                                                                         | protein_cc | 9606 11:643104 | 22 |
| ENST000001HRASLS2-001   | HRAS-like suppressor 2                                                            | protein_cc | 9606 11:635527 | 17 |
| ENST000001HRG-001       | histidine-rich glycoprotein                                                       | protein_cc | 9606 3:1866659 | 2  |
| ENST000001HRSP12-001    | heat-responsive protein 12                                                        | protein_cc | 9606 8:9810234 | 42 |
| ENST000001HS1BP3-001    | HCLS1 binding protein 3                                                           | protein_cc | 9606 2:2061782 | 41 |
| ENST000001HS3ST1-001    | heparan sulfate (glucosamine) 3-O-sulfotransferase 1                              | protein_cc | 9606 4:1139315 | 41 |
| ENST000001HS3ST2-001    | heparan sulfate (glucosamine) 3-O-sulfotransferase 2                              | protein_cc | 9606 16:228141 | 4  |
| ENST000001HS3ST3A1-001  | heparan sulfate (glucosamine) 3-O-sulfotransferase 3A1                            | protein_cc | 9606 17:134956 | 10 |
| ENST000001HSPA2-201     | heat shock 70kDa protein 2                                                        | protein_cc | 9606 14:645404 | 44 |
| ENST000001HSPA6-001     | heat shock 70kDa protein 6 (HSP70B')                                              | protein_cc | 9606 1:1615245 | 36 |
| ENST000001HSPB6-201     | heat shock protein, alpha-crystallin-related, B6                                  | protein_cc | 9606 19:357545 | 44 |
| ENST000001HYAL1-006     | hyaluronoglucosaminidase 1                                                        | protein_cc | 9606 3:5029989 | 5  |
| ENST000001IDO1-002      | indoleamine 2,3-dioxygenase 1                                                     | nonsense_  | 9606 8:3991386 | 5  |
| ENST000001IDUA-001      | iduronidase, alpha-L-                                                             | protein_cc | 9606 4:986997  | 37 |
| ENST000001IER2-001      | immediate early response 2                                                        | protein_cc | 9606 19:131504 | 20 |
| ENST000001IFNLR1-001    | interferon, lambda receptor 1                                                     | protein_cc | 9606 1:2415415 | 32 |
| ENST000001IFT43-201     | intraflagellar transport 43                                                       | protein_cc | 9606 14:759857 | 15 |
| ENST000001IGLON5-001    | IgLON family member 5                                                             | protein_cc | 9606 19:513118 | 25 |
| ENST000001IGSF10-001    | immunoglobulin superfamily, member 10                                             | protein_cc | 9606 3:1514334 | 33 |
| ENST000001IGSF21-001    | immunoglobulin superfamily, member 21                                             | protein_cc | 9606 1:1810774 | 2  |
| ENST000001IL13-001      | interleukin 13                                                                    | protein_cc | 9606 5:1326581 | 4  |
| ENST000001IL15-002      | interleukin 15                                                                    | protein_cc | 9606 4:1416365 | 24 |
| ENST000001IL18-001      | interleukin 18                                                                    | protein_cc | 9606 11:112143 | 22 |
| ENST000001IL18RAP-001   | interleukin 18 receptor accessory protein                                         | protein_cc | 9606 2:1024186 | 10 |
| ENST000001IL22RA1-001   | interleukin 22 receptor, alpha 1                                                  | protein_cc | 9606 1:2411977 | 13 |
| ENST000001ILDR1-001     | immunoglobulin-like domain containing receptor 1                                  | protein_cc | 9606 3:1219873 | 2  |
| ENST000001IMPG2-001     | interphotoreceptor matrix proteoglycan 2                                          | protein_cc | 9606 3:1012225 | 34 |
| ENST000001INH1-001      | inhibin, alpha                                                                    | protein_cc | 9606 2:2195721 | 13 |
| ENST000001INH2-001      | inhibin, beta B                                                                   | protein_cc | 9606 2:1203461 | 38 |
| ENST000001INH3-001      | inhibin, beta E                                                                   | protein_cc | 9606 12:574553 | 33 |
| ENST000001INMT-001      | indolethylamine N-methyltransferase                                               | protein_cc | 9606 7:3075213 | 3  |
| ENST000001INO80B-001    | INO80 complex subunit B                                                           | protein_cc | 9606 2:7445502 | 23 |
| ENST000001INSL3-001     | insulin-like 3 (Leydig cell)                                                      | protein_cc | 9606 19:178165 | 10 |
| ENST000001IP6K3-002     | inositol hexakisphosphate kinase 3                                                | protein_cc | 9606 6:3372167 | 7  |
| ENST000001IRGC-001      | immunity-related GTPase family, cinema                                            | protein_cc | 9606 19:437160 | 3  |
| ENST000001IRS1-001      | insulin receptor substrate 1                                                      | protein_cc | 9606 2:2267313 | 37 |
| ENST000001ISM1-001      | isthmin 1, angiogenesis inhibitor                                                 | protein_cc | 9606 20:132217 | 29 |
| ENST000001ITGA9-001     | integrin, alpha 9                                                                 | protein_cc | 9606 3:3745211 | 28 |
| ENST000001ITM2C-006     | integral membrane protein 2C                                                      | protein_cc | 9606 2:2308649 | 5  |
| ENST000001ITPKA-001     | inositol-trisphosphate 3-kinase A                                                 | protein_cc | 9606 15:414938 | 36 |
| ENST000001JDP2-003      | Jun dimerization protein 2                                                        | protein_cc | 9606 14:754321 | 41 |
| ENST000001JUNB-001      | jun B proto-oncogene                                                              | protein_cc | 9606 19:127914 | 44 |
| ENST000001JUND-001      | jun D proto-oncogene                                                              | protein_cc | 9606 19:182797 | 44 |
| ENST000001KBTBD11-001   | kelch repeat and BTB (POZ) domain containing 11                                   | protein_cc | 9606 8:1973878 | 43 |
| ENST000001KCNC1-002     | potassium voltage-gated channel, Shaw-related subfamily, member 1                 | protein_cc | 9606 11:177348 | 7  |
| ENST000001KCND1-001     | potassium voltage-gated channel, Shal-related subfamily, member 1                 | protein_cc | 9606 X:4896138 | 43 |
| ENST000001KCNE4-001     | potassium voltage-gated channel, Isk-related family, member 4                     | protein_cc | 9606 2:2230518 | 20 |
| ENST000001KCNG4-001     | potassium voltage-gated channel, subfamily G, member 4                            | protein_cc | 9606 16:842186 | 30 |
| ENST000001KCNJ1-002     | potassium inwardly-rectifying channel, subfamily J, member 1                      | protein_cc | 9606 11:128839 | 4  |
| ENST000001KCNK13-001    | potassium channel, subfamily K, member 13                                         | protein_cc | 9606 14:900617 | 17 |
| ENST000001KCNMB4-001    | potassium large conductance calcium-activated channel, subfamily M, beta member 4 | protein_cc | 9606 12:703662 | 40 |
| ENST000001KDM6B-001     | lysine (K)-specific demethylase 6B                                                | protein_cc | 9606 17:783990 | 27 |
| ENST000001KHDRBS2-001   | KH domain containing, RNA binding, signal transduction associated 2               | protein_cc | 9606 6:6167996 | 4  |
| ENST000001KIAA1045-001  | KIAA1045                                                                          | protein_cc | 9606 9:3495832 | 19 |

|                         |                                                                  |            |      |           |    |
|-------------------------|------------------------------------------------------------------|------------|------|-----------|----|
| ENST000001KIAA1109-009  | KIAA1109                                                         | protein_cc | 9606 | 4:1223244 | 35 |
| ENST000001KIF26A-001    | kinesin family member 26A                                        | protein_cc | 9606 | 14:104139 | 35 |
| ENST000001KIFC2-001     | kinesin family member C2                                         | protein_cc | 9606 | 8:1444660 | 34 |
| ENST000001KLF15-001     | Kruppel-like factor 15                                           | protein_cc | 9606 | 3:1263426 | 36 |
| ENST000001KLF2-001      | Kruppel-like factor 2                                            | protein_cc | 9606 | 19:163248 | 41 |
| ENST000001KLHDC3-201    | kelch domain containing 3                                        | protein_cc | 9606 | 6:4301410 | 2  |
| ENST000001KLRK1-001     | killer cell lectin-like receptor subfamily K, member 1           | protein_cc | 9606 | 12:103723 | 8  |
| ENST000001KMT2E-201     | lysine (K)-specific methyltransferase 2E                         | protein_cc | 9606 | 7:1050141 | 21 |
| ENST000001KNDC1-006     | kinase non-catalytic C-lobe domain (KIND) containing 1           | protein_cc | 9606 | 10:133160 | 17 |
| ENST000001KNG1-001      | kininogen 1                                                      | protein_cc | 9606 | 3:1867172 | 4  |
| ENST000001KNG1-002      | kininogen 1                                                      | protein_cc | 9606 | 3:1867173 | 12 |
| ENST000001KRT5-001      | keratin 5                                                        | protein_cc | 9606 | 12:525145 | 2  |
| ENST000001KRT73-001     | keratin 73                                                       | protein_cc | 9606 | 12:526075 | 2  |
| ENST000001KRT8-002      | keratin 8                                                        | protein_cc | 9606 | 12:528971 | 3  |
| ENST000001LAMTOR3-003   | late endosomal/lysosomal adaptor, MAPK and MTOR activator 3      | protein_cc | 9606 | 4:9988120 | 36 |
| ENST000001LBP-001       | lipopolysaccharide binding protein                               | protein_cc | 9606 | 20:383463 | 17 |
| ENST000001LCN15-002     | lipocalin 15                                                     | protein_cc | 9606 | 9:1367596 | 19 |
| ENST000001LCN2-001      | lipocalin 2                                                      | protein_cc | 9606 | 9:1281494 | 2  |
| ENST000001LDHA-003      | lactate dehydrogenase A                                          | protein_cc | 9606 | 11:183945 | 3  |
| ENST000001LENG1-001     | leukocyte receptor cluster (LRC) member 1                        | protein_cc | 9606 | 19:541551 | 35 |
| ENST000001LEPRE1-002    | leucine proline-enriched proteoglycan (leprecan) 1               | protein_cc | 9606 | 1:4274637 | 5  |
| ENST000001LGALS4-001    | lectin, galactoside-binding, soluble, 4                          | protein_cc | 9606 | 19:388016 | 15 |
| ENST000001LGI4-001      | leucine-rich repeat LGI family, member 4                         | protein_cc | 9606 | 19:351245 | 11 |
| ENST000001LIF-001       | leukemia inhibitory factor                                       | protein_cc | 9606 | 22:302404 | 30 |
| ENST000001LIN7B-001     | lin-7 homolog B (C. elegans)                                     | protein_cc | 9606 | 19:491143 | 29 |
| ENST000001LINC00324-001 | long intergenic non-protein coding RNA 324                       | lincRNA    | 9606 | 17:822064 | 39 |
| ENST000001LINC00471-001 | long intergenic non-protein coding RNA 471                       | lincRNA    | 9606 | 2:2315084 | 38 |
| ENST000001LINC00671-001 | long intergenic non-protein coding RNA 671                       | lincRNA    | 9606 | 17:428746 | 15 |
| ENST000001LIPH-001      | lipase, member H                                                 | protein_cc | 9606 | 3:1855062 | 25 |
| ENST000001LMO7DN-001    | LMO7 downstream neighbor                                         | protein_cc | 9606 | 13:758710 | 7  |
| ENST000001LOH12CR1-002  | loss of heterozygosity, 12, chromosomal region 1                 | protein_cc | 9606 | 12:123574 | 7  |
| ENST000001LPA-001       | lipoprotein, Lp(a)                                               | protein_cc | 9606 | 6:1605314 | 2  |
| ENST000001LPPR2-001     | Lipid phosphate phosphatase-related protein type 2               | protein_cc | 9606 | 19:113553 | 43 |
| ENST000001LRFN1-001     | leucine rich repeat and fibronectin type III domain containing 1 | protein_cc | 9606 | 19:393065 | 28 |
| ENST000001LRG1-001      | leucine-rich alpha-2-glycoprotein 1                              | protein_cc | 9606 | 19:453640 | 39 |
| ENST000001LRGUK-001     | leucine-rich repeats and guanylate kinase domain containing      | protein_cc | 9606 | 7:1341272 | 29 |
| ENST000001LRP2-001      | low density lipoprotein receptor-related protein 2               | protein_cc | 9606 | 2:1691271 | 12 |
| ENST000001LRRC31-002    | leucine rich repeat containing 31                                | protein_cc | 9606 | 3:1698392 | 3  |
| ENST000001LRRC32-001    | leucine rich repeat containing 32                                | protein_cc | 9606 | 11:766575 | 44 |
| ENST000001LRRC56-001    | leucine rich repeat containing 56                                | protein_cc | 9606 | 11:537527 | 38 |
| ENST000001LRRC75B-001   | leucine rich repeat containing 75B                               | protein_cc | 9606 | 22:245856 | 32 |
| ENST000001LSM8-001      | LSM8 homolog, U6 small nuclear RNA associated (S. cerevisiae)    | protein_cc | 9606 | 7:1181840 | 41 |
| ENST000001LSP1-004      | lymphocyte-specific protein 1                                    | protein_cc | 9606 | 11:185297 | 10 |
| ENST000001LTBP4-008     | latent transforming growth factor beta binding protein 4         | protein_cc | 9606 | 19:406097 | 2  |
| ENST000001LTC4S-001     | leukotriene C4 synthase                                          | protein_cc | 9606 | 5:1797939 | 2  |
| ENST000001LYPD6B-201    | LY6/PLAUR domain containing 6B                                   | protein_cc | 9606 | 2:1492045 | 8  |
| ENST000001LYVE1-001     | lymphatic vessel endothelial hyaluronan receptor 1               | protein_cc | 9606 | 11:105569 | 42 |
| ENST000001LYZ-001       | lysozyme                                                         | protein_cc | 9606 | 12:693483 | 24 |
| ENST000001MACROD1-001   | MACRO domain containing 1                                        | protein_cc | 9606 | 11:639985 | 38 |
| ENST000001MADCAM1-002   | mucosal vascular addressin cell adhesion molecule 1              | protein_cc | 9606 | 19:496494 | 3  |
| ENST000001MAP3K12-004   | mitogen-activated protein kinase kinase kinase 12                | protein_cc | 9606 | 12:534796 | 5  |
| ENST000001MAPK3-001     | mitogen-activated protein kinase 3                               | protein_cc | 9606 | 16:301141 | 27 |
| ENST000001MAPK8IP2-002  | mitogen-activated protein kinase 8 interacting protein 2         | protein_cc | 9606 | 22:506031 | 24 |
| ENST000001MAPRE3-001    | microtubule-associated protein, RP/EB family, member 3           | protein_cc | 9606 | 2:2697061 | 41 |
| ENST000001MARCH9-001    | membrane-associated ring finger (C3HC4) 9                        | protein_cc | 9606 | 12:577550 | 43 |
| ENST000001MAST3-001     | microtubule associated serine/threonine kinase 3                 | protein_cc | 9606 | 19:180977 | 36 |
| ENST000001MATK-003      | megakaryocyte-associated tyrosine kinase                         | protein_cc | 9606 | 19:377797 | 7  |
| ENST000001MATN2-201     | matrilin 2                                                       | protein_cc | 9606 | 8:9786908 | 14 |
| ENST000001MCF2L-034     | MCF.2 cell line derived transforming sequence-like               | protein_cc | 9606 | 13:113087 | 9  |
| ENST000001MCHR2-201     | melanin-concentrating hormone receptor 2                         | protein_cc | 9606 | 6:9991991 | 6  |
| ENST000001MED26-001     | mediator complex subunit 26                                      | protein_cc | 9606 | 19:165749 | 2  |
| ENST000001MED29-001     | mediator complex subunit 29                                      | protein_cc | 9606 | 19:393913 | 11 |
| ENST000001MEMO1-001     | mediator of cell motility 1                                      | protein_cc | 9606 | 2:3186506 | 6  |
| ENST000001MESP1-001     | mesoderm posterior basic helix-loop-helix transcription factor 1 | protein_cc | 9606 | 15:897486 | 42 |
| ENST000001METRNL-001    | meteorin, glial cell differentiation regulator-like              | protein_cc | 9606 | 17:830796 | 44 |
| ENST000001MGMT-001      | O-6-methylguanine-DNA methyltransferase                          | protein_cc | 9606 | 10:129467 | 41 |
| ENST000001MGST2-001     | microsomal glutathione S-transferase 2                           | protein_cc | 9606 | 4:1396657 | 35 |
| ENST000001MIDN-201      | midnolin                                                         | protein_cc | 9606 | 19:124855 | 42 |
| ENST000001MIIP-001      | migration and invasion inhibitory protein                        | protein_cc | 9606 | 1:1201946 | 43 |
| ENST000001MIPOL1-001    | mirror-image polydactyly 1                                       | protein_cc | 9606 | 14:371979 | 9  |
| ENST000001MISP-001      | mitotic spindle positioning                                      | protein_cc | 9606 | 19:751126 | 18 |
| ENST000001MMP15-001     | matrix metalloproteinase 15 (membrane-inserted)                  | protein_cc | 9606 | 16:580255 | 44 |
| ENST000001MNS1-001      | meiosis-specific nuclear structural 1                            | protein_cc | 9606 | 15:564287 | 35 |
| ENST000001MOB3B-001     | MOB kinase activator 3B                                          | protein_cc | 9606 | 9:2732520 | 36 |
| ENST000001MOB3C-001     | MOB kinase activator 3C                                          | protein_cc | 9606 | 1:4660771 | 2  |
| ENST000001MPV17L-001    | MPV17 mitochondrial membrane protein-like                        | protein_cc | 9606 | 16:153957 | 5  |
| ENST000001MROH1-201     | maestro heat-like repeat family member 1                         | protein_cc | 9606 | 8:1441637 | 14 |
| ENST000001MRPL10-003    | mitochondrial ribosomal protein L10                              | protein_cc | 9606 | 17:478234 | 5  |
| ENST000001MRPL34-001    | mitochondrial ribosomal protein L34                              | protein_cc | 9606 | 19:173056 | 30 |
| ENST000001MRPL43-007    | mitochondrial ribosomal protein L43                              | protein_cc | 9606 | 10:100981 | 6  |
| ENST000001MRPS25-001    | mitochondrial ribosomal protein S25                              | protein_cc | 9606 | 3:1504851 | 3  |
| ENST000001MS4A10-001    | membrane-spanning 4-domains, subfamily A, member 10              | protein_cc | 9606 | 11:607853 | 21 |
| ENST000001MSC-001       | musculin                                                         | protein_cc | 9606 | 8:7184154 | 20 |
| ENST000001MSS51-201     | MSS51 mitochondrial translational activator                      | protein_cc | 9606 | 10:734235 | 20 |
| ENST000001MSTN-001      | myostatin                                                        | protein_cc | 9606 | 2:1900556 | 23 |
| ENST000001MXRA5-001     | matrix-remodelling associated 5                                  | protein_cc | 9606 | X:3308565 | 11 |
| ENST000001MYB-201       | v-myb avian myeloblastosis viral oncogene homolog                | protein_cc | 9606 | 6:1351813 | 12 |

|                        |                                                                                     |             |      |           |    |
|------------------------|-------------------------------------------------------------------------------------|-------------|------|-----------|----|
| ENST000001MYBPC3-201   | myosin binding protein C, cardiac                                                   | protein_cc  | 9606 | 11:473314 | 4  |
| ENST000001MYH14-201    | myosin, heavy chain 14, non-muscle                                                  | protein_cc  | 9606 | 19:502683 | 16 |
| ENST000001MYO1G-000    | myosin IG                                                                           | protein_cc  | 9606 | 7:4496266 | 2  |
| ENST000001NAALAD2-002  | N-acetylated alpha-linked acidic dipeptidase 2                                      | protein_cc  | 9606 | 11:901347 | 9  |
| ENST000001NAB2-001     | NGFI-A binding protein 2 (EGR1 binding protein 2)                                   | protein_cc  | 9606 | 12:570888 | 7  |
| ENST000001NANOG-001    | Nanog homeobox                                                                      | protein_cc  | 9606 | 12:778939 | 31 |
| ENST000001NAT2-001     | N-acetyltransferase 2 (arylamine N-acetyltransferase)                               | protein_cc  | 9606 | 8:1839124 | 20 |
| ENST000001NCALD-003    | neurocalcin delta                                                                   | protein_cc  | 9606 | 8:1016867 | 19 |
| ENST000001NCAM2-201    | neural cell adhesion molecule 2                                                     | protein_cc  | 9606 | 21:212805 | 39 |
| ENST000001NCAN-001     | neurocan                                                                            | protein_cc  | 9606 | 19:192119 | 11 |
| ENST000001NDRG2-004    | NDRG family member 2                                                                | protein_cc  | 9606 | 14:210168 | 4  |
| ENST000001NDUFA10-001  | NADH dehydrogenase (ubiquinone) 1 alpha subcomplex, 10, 42kDa                       | protein_cc  | 9606 | 2:2399573 | 6  |
| ENST000001NDUFA2-001   | NADH dehydrogenase (ubiquinone) 1 alpha subcomplex, 2, 8kDa                         | protein_cc  | 9606 | 5:1406452 | 29 |
| ENST000001NEURL3-002   | neuralized E3 ubiquitin protein ligase 3                                            | protein_cc  | 9606 | 2:9649764 | 16 |
| ENST000001NFKBIA-001   | nuclear factor of kappa light polypeptide gene enhancer in B-cells inhibitor, alpha | protein_cc  | 9606 | 14:354015 | 42 |
| ENST000001NGFR-001     | nerve growth factor receptor                                                        | protein_cc  | 9606 | 17:494952 | 22 |
| ENST000001NHLH1-001    | nescent helix loop helix 1                                                          | protein_cc  | 9606 | 1:1603670 | 40 |
| ENST000001NHP2-002     | NHP2 ribonucleoprotein                                                              | protein_cc  | 9606 | 5:1781494 | 4  |
| ENST000001NINL-007     | ninein-like                                                                         | protein_cc  | 9606 | 20:254527 | 39 |
| ENST000001NKD2-002     | naked cuticle homolog 2 (Drosophila)                                                | protein_cc  | 9606 | 5:1008962 | 20 |
| ENST000001NKG7-001     | natural killer cell granule protein 7                                               | protein_cc  | 9606 | 19:513716 | 3  |
| ENST000001NLRP12-001   | NLR family, pyrin domain containing 12                                              | protein_cc  | 9606 | 19:537936 | 31 |
| ENST000001NLRP6-001    | NLR family, pyrin domain containing 6                                               | protein_cc  | 9606 | 11:278570 | 7  |
| ENST000001NMUR1-001    | neuromedin U receptor 1                                                             | protein_cc  | 9606 | 2:2315231 | 26 |
| ENST000001NOV-001      | nephroblastoma overexpressed                                                        | protein_cc  | 9606 | 8:1194163 | 41 |
| ENST000001NOX5-010     | NADPH oxidase, EF-hand calcium binding domain 5                                     | protein_cc  | 9606 | 15:689305 | 11 |
| ENST000001NPAS4-001    | neuronal PAS domain protein 4                                                       | protein_cc  | 9606 | 11:664210 | 2  |
| ENST000001NPFF-001     | neuropeptide FF-amide peptide precursor                                             | protein_cc  | 9606 | 12:535066 | 3  |
| ENST000001NPL-201      | N-acetylneuraminate pyruvate lyase (dihydrodipicolinate synthase)                   | protein_cc  | 9606 | 1:1827943 | 5  |
| ENST000001NPR3-001     | natriuretic peptide receptor 3                                                      | protein_cc  | 9606 | 5:3271143 | 11 |
| ENST000001NPY1R-001    | neuropeptide Y receptor Y1                                                          | protein_cc  | 9606 | 4:1633239 | 19 |
| ENST000001NR0B2-001    | nuclear receptor subfamily 0, group B, member 2                                     | protein_cc  | 9606 | 1:2691148 | 9  |
| ENST000001NRXN2-003    | neurexin 2                                                                          | protein_cc  | 9606 | 11:646061 | 2  |
| ENST000001NRXN3-005    | neurexin 3                                                                          | protein_cc  | 9606 | 14:792794 | 8  |
| ENST000001NSUN7-002    | NOP2/Sun domain family, member 7                                                    | protein_cc  | 9606 | 4:4074992 | 24 |
| ENST000001NTN1-001     | netrin 1                                                                            | protein_cc  | 9606 | 17:902154 | 36 |
| ENST000001NTN5-001     | netrin 5                                                                            | protein_cc  | 9606 | 19:486614 | 8  |
| ENST000001NTS-001      | neurotensin                                                                         | protein_cc  | 9606 | 12:858742 | 10 |
| ENST000001NUPR1-001    | nuclear protein, transcriptional regulator, 1                                       | protein_cc  | 9606 | 16:285327 | 40 |
| ENST000001NYAP1-001    | neuronal tyrosine-phosphorylated phosphoinositide-3-kinase adaptor 1                | protein_cc  | 9606 | 7:1004839 | 40 |
| ENST000001OCM-001      | oncomodulin                                                                         | protein_cc  | 9606 | 7:5880798 | 3  |
| ENST000001ODF2L-002    | outer dense fiber of sperm tails 2-like                                             | protein_cc  | 9606 | 1:8635009 | 18 |
| ENST000001OLFM1-001    | olfactomedin 1                                                                      | protein_cc  | 9606 | 9:1350755 | 16 |
| ENST000001ONECUT1-001  | one cut homeobox 1                                                                  | protein_cc  | 9606 | 15:527569 | 9  |
| ENST000001OR1N1-001    | olfactory receptor, family 1, subfamily N, member 1                                 | protein_cc  | 9606 | 9:1225263 | 6  |
| ENST000001OR52N2-001   | olfactory receptor, family 52, subfamily N, member 2                                | protein_cc  | 9606 | 11:582031 | 2  |
| ENST000001OR52N4-001   | olfactory receptor, family 52, subfamily N, member 4 (gene/pseudogene)              | protein_cc  | 9606 | 11:575469 | 8  |
| ENST000001OR6F1-001    | olfactory receptor, family 6, subfamily F, member 1                                 | protein_cc  | 9606 | 1:2477118 | 2  |
| ENST000001ORM1-001     | orosomucoid 1                                                                       | protein_cc  | 9606 | 9:1143230 | 3  |
| ENST000001OSM-001      | oncostatin M                                                                        | protein_cc  | 9606 | 22:302628 | 4  |
| ENST000001OSR1-001     | odd-skipped related transcription factor 1                                          | protein_cc  | 9606 | 2:1935148 | 20 |
| ENST000001OTC-001      | ornithine carbamoyltransferase                                                      | protein_cc  | 9606 | X:3835254 | 10 |
| ENST000001OTUB1-002    | OTU deubiquitinase, ubiquitin aldehyde binding 1                                    | retained_ci | 9606 | 11:639858 | 4  |
| ENST000001OTUD7A-001   | OTU deubiquitinase 7A                                                               | protein_cc  | 9606 | 15:314753 | 26 |
| ENST000001P2RY13-001   | purinergic receptor P2Y, G-protein coupled, 13                                      | protein_cc  | 9606 | 3:1513263 | 5  |
| ENST000001PAG1-001     | phosphoprotein membrane anchor with glycosphingolipid microdomains 1                | protein_cc  | 9606 | 8:8096781 | 37 |
| ENST000001PAH-002      | phenylalanine hydroxylase                                                           | protein_cc  | 9606 | 12:102838 | 3  |
| ENST000001PAIP2B-001   | poly(A) binding protein interacting protein 2B                                      | protein_cc  | 9606 | 2:7118273 | 44 |
| ENST000001PCDH9-001    | protocadherin beta 9                                                                | protein_cc  | 9606 | 5:1411871 | 28 |
| ENST000001PCK1-001     | phosphoenolpyruvate carboxykinase 1 (soluble)                                       | protein_cc  | 9606 | 20:575610 | 7  |
| ENST000001PCM1-201     | pericentriolar material 1                                                           | protein_cc  | 9606 | 8:1792285 | 12 |
| ENST000001PCSK7-001    | proprotein convertase subtilisin/kexin type 7                                       | protein_cc  | 9606 | 11:117204 | 14 |
| ENST000001PCSK9-001    | proprotein convertase subtilisin/kexin type 9                                       | protein_cc  | 9606 | 1:5503954 | 24 |
| ENST000001PDK1-001     | pyruvate dehydrogenase kinase, isozyme 1                                            | protein_cc  | 9606 | 2:1725559 | 8  |
| ENST000001PF4-001      | platelet factor 4                                                                   | protein_cc  | 9606 | 4:7398107 | 15 |
| ENST000001PGR-001      | progesterone receptor                                                               | protein_cc  | 9606 | 11:101029 | 10 |
| ENST000001PHYKPL-001   | 5-phosphohydroxy-L-lysine phospho-lyase                                             | protein_cc  | 9606 | 5:1782084 | 5  |
| ENST000001PIEZO1-201   | piezo-type mechanosensitive ion channel component 1                                 | protein_cc  | 9606 | 16:887154 | 2  |
| ENST000001PIP5K1B-001  | phosphatidylinositol-4-phosphate 5-kinase, type I, beta                             | protein_cc  | 9606 | 9:6870570 | 17 |
| ENST000001PIWIL1-001   | piwi-like RNA-mediated gene silencing 1                                             | protein_cc  | 9606 | 12:130337 | 18 |
| ENST000001PKDCC-001    | protein kinase domain containing, cytoplasmic                                       | protein_cc  | 9606 | 2:4204802 | 24 |
| ENST000001PLEK-001     | pleckstrin                                                                          | protein_cc  | 9606 | 2:6836517 | 27 |
| ENST000001PLEKHDI1-002 | pleckstrin homology domain containing, family D (with coiled-coil domains) member 1 | protein_cc  | 9606 | 14:694847 | 34 |
| ENST000001PLEKHG4B-001 | pleckstrin homology domain containing, family G (with RhoGef domain) member 4B      | protein_cc  | 9606 | 5:140258  | 22 |
| ENST000001PLEKHG6-001  | pleckstrin homology domain containing, family G (with RhoGef domain) member 6       | protein_cc  | 9606 | 12:631043 | 14 |
| ENST000001PLG-001      | plasminogen                                                                         | protein_cc  | 9606 | 6:1607022 | 2  |
| ENST000001PLIN4-001    | perilipin 4                                                                         | protein_cc  | 9606 | 19:450219 | 4  |
| ENST000001PNKD-003     | paroxysmal nonkinesigenic dyskinesia                                                | protein_cc  | 9606 | 2:2182703 | 42 |
| ENST000001PNMT-001     | phenylethanolamine N-methyltransferase                                              | protein_cc  | 9606 | 17:396681 | 10 |
| ENST000001PNN-001      | pinin, desmosome associated protein                                                 | protein_cc  | 9606 | 14:391752 | 44 |
| ENST000001PNPLA7-007   | patatin-like phospholipase domain containing 7                                      | protein_cc  | 9606 | 9:1374599 | 11 |
| ENST000001POLR1D-003   | polymerase (RNA) I polypeptide D, 16kDa                                             | protein_cc  | 9606 | 13:276207 | 3  |
| ENST000001PON1-001     | paraoxonase 1                                                                       | protein_cc  | 9606 | 7:9529767 | 13 |
| ENST000001PPP1R14A-001 | protein phosphatase 1, regulatory (inhibitor) subunit 14A                           | protein_cc  | 9606 | 19:382512 | 41 |
| ENST000001PPP1R1A-001  | protein phosphatase 1, regulatory (inhibitor) subunit 1A                            | protein_cc  | 9606 | 12:545792 | 8  |
| ENST000001PPP1R3F-001  | protein phosphatase 1, regulatory subunit 3F                                        | protein_cc  | 9606 | X:4926985 | 36 |
| ENST000001PPP2R5B-001  | protein phosphatase 2, regulatory subunit B', beta                                  | protein_cc  | 9606 | 11:649246 | 34 |

|                             |                                                                        |            |      |           |    |
|-----------------------------|------------------------------------------------------------------------|------------|------|-----------|----|
| ENST000001PPP4R4-001        | protein phosphatase 4, regulatory subunit 4                            | protein_cc | 9606 | 14:941743 | 11 |
| ENST000001PRDM10-004        | PR domain containing 10                                                | protein_cc | 9606 | 11:129899 | 6  |
| ENST000001PRKD2-001         | protein kinase D2                                                      | protein_cc | 9606 | 19:466743 | 24 |
| ENST000001PROCA1-001        | protein interacting with cyclin A1                                     | protein_cc | 9606 | 17:287031 | 15 |
| ENST000001PROM2-001         | prominin 2                                                             | protein_cc | 9606 | 2:9527445 | 4  |
| ENST000001PROSD1P-001       | prolyl-tRNA synthetase associated domain containing 1, pseudogene      | unitary_ps | 9606 | 2:5528232 | 8  |
| ENST000001PRR18-001         | proline rich 18                                                        | protein_cc | 9606 | 6:1663053 | 14 |
| ENST000001PRRG4-001         | proline rich Gla (G-carboxyglutamic acid) 4 (transmembrane)            | protein_cc | 9606 | 11:328299 | 41 |
| ENST000001PRSS27-001        | protease, serine 27                                                    | protein_cc | 9606 | 16:271241 | 14 |
| ENST000001PRSS8-001         | protease, serine, 8                                                    | protein_cc | 9606 | 16:311314 | 12 |
| ENST000001PRTN3-001         | proteinase 3                                                           | protein_cc | 9606 | 19:840960 | 7  |
| ENST000001PSD2-001          | pleckstrin and Sec7 domain containing 2                                | protein_cc | 9606 | 5:1397958 | 17 |
| ENST000001PTCD1-001         | pentatricopeptide repeat domain 1                                      | protein_cc | 9606 | 7:9941673 | 9  |
| ENST000001PTGDR-001         | prostaglandin D2 receptor (DP)                                         | protein_cc | 9606 | 14:522677 | 5  |
| ENST000001PTGER2-001        | prostaglandin E receptor 2 (subtype EP2), 53kDa                        | protein_cc | 9606 | 14:523143 | 12 |
| ENST000001PTPRR-001         | protein tyrosine phosphatase, receptor type, R                         | protein_cc | 9606 | 12:706380 | 2  |
| ENST000001PXN-001           | paxillin                                                               | protein_cc | 9606 | 12:120210 | 4  |
| ENST000001PYCARD-001        | PYD and CARD domain containing                                         | protein_cc | 9606 | 16:312014 | 33 |
| ENST000001RAB20-001         | RAB20, member RAS oncogene family                                      | protein_cc | 9606 | 13:110523 | 44 |
| ENST000001RAB24-001         | RAB24, member RAS oncogene family                                      | protein_cc | 9606 | 5:1773014 | 8  |
| ENST000001RAB39A-001        | RAB39A, member RAS oncogene family                                     | protein_cc | 9606 | 11:107928 | 23 |
| ENST000001RAB3C-001         | RAB3C, member RAS oncogene family                                      | protein_cc | 9606 | 5:5858304 | 36 |
| ENST000001RAB40AL-001       | RAB40A, member RAS oncogene family-like                                | protein_cc | 9606 | X:1029372 | 15 |
| ENST000001RAMP1-001         | receptor (G protein-coupled) activity modifying protein 1              | protein_cc | 9606 | 2:2378595 | 13 |
| ENST000001RAMP2-001         | receptor (G protein-coupled) activity modifying protein 2              | protein_cc | 9606 | 17:427611 | 40 |
| ENST000001RAMP3-001         | receptor (G protein-coupled) activity modifying protein 3              | protein_cc | 9606 | 7:4515779 | 13 |
| ENST000001RAPGEFL1-007      | Rap guanine nucleotide exchange factor (GEF)-like 1                    | protein_cc | 9606 | 17:401770 | 20 |
| ENST000001RAPSN-001         | receptor-associated protein of the synapse                             | protein_cc | 9606 | 11:474377 | 12 |
| ENST000001RARRES2-001       | retinoic acid receptor responder (tazarotene induced) 2                | protein_cc | 9606 | 7:1503383 | 9  |
| ENST000001RARRES3-001       | retinoic acid receptor responder (tazarotene induced) 3                | protein_cc | 9606 | 11:635368 | 34 |
| ENST000001RASA4-001         | RAS p21 protein activator 4                                            | protein_cc | 9606 | 7:1025796 | 21 |
| ENST000001RASD1-001         | RAS, dexamethasone-induced 1                                           | protein_cc | 9606 | 17:174944 | 44 |
| ENST000001RASGRP1-001       | RAS guanyl releasing protein 1 (calcium and DAG-regulated)             | protein_cc | 9606 | 15:384881 | 21 |
| ENST000001RASL10A-001       | RAS-like, family 10, member A                                          | protein_cc | 9606 | 22:293129 | 32 |
| ENST000001RBM46-003         | RNA binding motif protein 46                                           | protein_cc | 9606 | 4:1547812 | 2  |
| ENST000001RBM48-001         | RNA binding motif protein 48                                           | protein_cc | 9606 | 7:9252877 | 39 |
| ENST000001RBMY2FP-001       | RNA binding motif protein, Y-linked, family 2, member F pseudogene     | processed  | 9606 | Y:2230885 | 2  |
| ENST000001RBP1-001          | retinol binding protein 1, cellular                                    | protein_cc | 9606 | 3:1395174 | 30 |
| ENST000001RBP5-001          | retinol binding protein 5, cellular                                    | protein_cc | 9606 | 12:712368 | 32 |
| ENST000001RBP7-001          | retinol binding protein 7, cellular                                    | protein_cc | 9606 | 1:9997216 | 11 |
| ENST000001RBP7-002          | retinol binding protein 7, cellular                                    | nonsense   | 9606 | 1:9997206 | 17 |
| ENST000001REEP6-001         | receptor accessory protein 6                                           | protein_cc | 9606 | 19:149074 | 41 |
| ENST000001RELB-001          | v-rel avian reticuloendotheliosis viral oncogene homolog B             | protein_cc | 9606 | 19:450014 | 39 |
| ENST000001RELL1-001         | RELT-like 1                                                            | protein_cc | 9606 | 4:3759080 | 7  |
| ENST000001REM1-001          | RAS (RAD and GEM)-like GTP-binding 1                                   | protein_cc | 9606 | 20:314752 | 39 |
| ENST000001REM2-001          | RAS (RAD and GEM)-like GTP binding 2                                   | protein_cc | 9606 | 14:228831 | 30 |
| ENST000001RGS2-001          | regulator of G-protein signaling 2                                     | protein_cc | 9606 | 1:1928090 | 42 |
| ENST000001RHBDL1-001        | rhomboid, veinlet-like 1 (Drosophila)                                  | protein_cc | 9606 | 16:676075 | 21 |
| ENST000001RHOB-001          | ras homolog family member B                                            | protein_cc | 9606 | 2:2044707 | 44 |
| ENST000001RHOFX1-001        | Rhox homeobox family, member 1                                         | protein_cc | 9606 | X:1201090 | 3  |
| ENST000001RHPN1-001         | rhophilin, Rho GTPase binding protein 1                                | protein_cc | 9606 | 8:1433688 | 28 |
| ENST000001RIOK1-002         | RIO kinase 1                                                           | retained_i | 9606 | 6:7396752 | 3  |
| ENST000001RNASE2-001        | ribonuclease, RNase A family, 2 (liver, eosinophil-derived neurotoxin) | protein_cc | 9606 | 14:209554 | 10 |
| ENST000001RNASE6-002        | ribonuclease, RNase A family, k6                                       | protein_cc | 9606 | 14:207810 | 39 |
| ENST000001RNASE7-001        | ribonuclease, RNase A family, 7                                        | protein_cc | 9606 | 14:210422 | 4  |
| ENST000001RNF113B-001       | ring finger protein 113B                                               | protein_cc | 9606 | 13:981757 | 15 |
| ENST000001RNF114-001        | ring finger protein 114                                                | protein_cc | 9606 | 20:499363 | 31 |
| ENST000001RNF125-001        | ring finger protein 125, E3 ubiquitin protein ligase                   | protein_cc | 9606 | 18:320183 | 14 |
| ENST000001RNF128-001        | ring finger protein 128, E3 ubiquitin protein ligase                   | protein_cc | 9606 | X:1067266 | 13 |
| ENST000001RNF144A-001       | ring finger protein 144A                                               | protein_cc | 9606 | 2:6917392 | 37 |
| ENST000001RNF157-010        | ring finger protein 157                                                | protein_cc | 9606 | 17:761443 | 17 |
| ENST000001RNF185-002        | ring finger protein 185                                                | protein_cc | 9606 | 22:311602 | 3  |
| ENST000001RNFT2-001         | ring finger protein, transmembrane 2                                   | protein_cc | 9606 | 12:116738 | 37 |
| ENST000001ROPN1L-001        | rhophilin associated tail protein 1-like                               | protein_cc | 9606 | 5:1044187 | 39 |
| ENST000001RP11-15G8.1-001   |                                                                        | processed  | 9606 | 6:1547066 | 17 |
| ENST000001RP11-16K12.1-001  |                                                                        | antisense  | 9606 | 15:789788 | 24 |
| ENST000001RP11-683L23.1-201 | Tubulin beta-8 chain-like protein LOC260334                            | protein_cc | 9606 | 18:473904 | 11 |
| ENST000001RP4-763G1.2-001   |                                                                        | lincRNA    | 9606 | 1:6752963 | 17 |
| ENST000001RPL23P2-001       | ribosomal protein L23 pseudogene 2                                     | processed  | 9606 | 21:289976 | 27 |
| ENST000001RPS20-002         | ribosomal protein S20                                                  | protein_cc | 9606 | 8:5607294 | 43 |
| ENST000001RPS27A-001        | ribosomal protein S27a                                                 | protein_cc | 9606 | 2:5523240 | 20 |
| ENST000001RRAS-001          | related RAS viral (r-ras) oncogene homolog                             | protein_cc | 9606 | 19:496352 | 44 |
| ENST000001RSPH4A-002        | radial spoke head 4 homolog A (Chlamydomonas)                          | protein_cc | 9606 | 6:1166164 | 11 |
| ENST000001RSPO4-001         | R-spondin 4                                                            | protein_cc | 9606 | 20:958452 | 6  |
| ENST000001RTKN2-003         | rhotekin 2                                                             | protein_cc | 9606 | 10:621830 | 5  |
| ENST000001RTP3-001          | receptor (chemosensory) transporter protein 3                          | protein_cc | 9606 | 3:4649749 | 9  |
| ENST000001RTP4-001          | receptor (chemosensory) transporter protein 4                          | protein_cc | 9606 | 3:1873683 | 31 |
| ENST000001S100B-001         | S100 calcium binding protein B                                         | protein_cc | 9606 | 21:465989 | 12 |
| ENST000001S100P-001         | S100 calcium binding protein P                                         | protein_cc | 9606 | 4:6693069 | 29 |
| ENST000001S100Z-002         | S100 calcium binding protein Z                                         | protein_cc | 9606 | 5:7685009 | 2  |
| ENST000001SAA2-002          | serum amyloid A2                                                       | protein_cc | 9606 | 11:182452 | 2  |
| ENST000001SAA4-001          | serum amyloid A4, constitutive                                         | protein_cc | 9606 | 11:182313 | 4  |
| ENST000001SALL1-001         | spalt-like transcription factor 1                                      | protein_cc | 9606 | 16:511359 | 6  |
| ENST000001SALL4-001         | spalt-like transcription factor 4                                      | protein_cc | 9606 | 20:517840 | 20 |
| ENST000001SAMD14-003        | sterile alpha motif domain containing 14                               | protein_cc | 9606 | 17:501113 | 3  |
| ENST000001SAT2-002          | spermidine/spermine N1-acetyltransferase family member 2               | protein_cc | 9606 | 17:762623 | 38 |
| ENST000001SBSPON-001        | somatomedin B and thrombospondin, type 1 domain containing             | protein_cc | 9606 | 8:7306454 | 22 |

|                          |                                                                                                                                  |            |      |           |    |
|--------------------------|----------------------------------------------------------------------------------------------------------------------------------|------------|------|-----------|----|
| ENST000001SCAND1-002     | SCAN domain containing 1                                                                                                         | protein_cc | 9606 | 20:359536 | 43 |
| ENST000001SCG2-001       | secretogranin II                                                                                                                 | protein_cc | 9606 | 2:2235969 | 25 |
| ENST000001SCGB3A1-001    | secretoglobulin, family 3A, member 1                                                                                             | protein_cc | 9606 | 5:1805901 | 27 |
| ENST000001SCN3A-001      | sodium channel, voltage-gated, type III, alpha subunit                                                                           | protein_cc | 9606 | 2:1650875 | 5  |
| ENST000001SCNN1D-003     | sodium channel, non-voltage-gated 1, delta subunit                                                                               | protein_cc | 9606 | 1:1282109 | 10 |
| ENST000001SCT-001        | secretin                                                                                                                         | protein_cc | 9606 | 11:626431 | 8  |
| ENST000001SCTR-001       | secretin receptor                                                                                                                | protein_cc | 9606 | 2:1194398 | 6  |
| ENST000001SDR9C7-001     | short chain dehydrogenase/reductase family 9C, member 7                                                                          | protein_cc | 9606 | 12:569231 | 6  |
| ENST000001SDS-001        | serine dehydratase                                                                                                               | protein_cc | 9606 | 12:113392 | 15 |
| ENST000001SEC16A-004     | SEC16 homolog A ( <i>S. cerevisiae</i> )                                                                                         | protein_cc | 9606 | 9:1364401 | 8  |
| ENST000001SEMA4C-001     | sema domain, immunoglobulin domain (Ig), transmembrane domain (TM) and short cytoplasmic domain, (semaphorin) 4C                 | protein_cc | 9606 | 2:9685971 | 39 |
| ENST000001SEMA5B-201     | sema domain, seven thrombospondin repeats (type 1 and type 1-like), transmembrane domain (TM) and short cytoplasmic domain, (sem | protein_cc | 9606 | 3:1229091 | 5  |
| ENST000001SEPW1P-001     | selenoprotein W, 1 pseudogene                                                                                                    | processed  | 9606 | 1:3109498 | 22 |
| ENST000001SERPINA10-001  | serpin peptidase inhibitor, clade A (alpha-1 antiprotease, antitrypsin), member 10                                               | protein_cc | 9606 | 14:942804 | 31 |
| ENST000001SERPINF2-201   | serpin peptidase inhibitor, clade F (alpha-2 antiplasmin, pigment epithelium derived factor), member 2                           | protein_cc | 9606 | 17:174283 | 5  |
| ENST000001SFRP5-001      | secreted frizzled-related protein 5                                                                                              | protein_cc | 9606 | 10:977667 | 21 |
| ENST000001SH3GL3-001     | SH3-domain GRB2-like 3                                                                                                           | protein_cc | 9606 | 15:834475 | 6  |
| ENST000001SHANK2-AS3-001 | SHANK2 antisense RNA 3                                                                                                           | antisense  | 9606 | 11:708627 | 22 |
| ENST000001SHC2-001       | SHC (Src homolog 2 domain containing) transforming protein 2                                                                     | protein_cc | 9606 | 19:416583 | 35 |
| ENST000001SHOC2-201      | soc-2 suppressor of clear homolog ( <i>C. elegans</i> )                                                                          | protein_cc | 9606 | 10:110964 | 2  |
| ENST000001SHROOM3-001    | shroom family member 3                                                                                                           | protein_cc | 9606 | 4:764310  | 6  |
| ENST000001SIDT1-001      | SID1 transmembrane family, member 1                                                                                              | protein_cc | 9606 | 3:1135322 | 29 |
| ENST000001SIGLEC12-001   | sialic acid binding Ig-like lectin 12 (gene/pseudogene)                                                                          | protein_cc | 9606 | 19:514913 | 4  |
| ENST000001SIGLECS9-001   | sialic acid binding Ig-like lectin 9                                                                                             | protein_cc | 9606 | 19:511249 | 8  |
| ENST000001SIK1-001       | salt-inducible kinase 1                                                                                                          | protein_cc | 9606 | 21:434145 | 36 |
| ENST000001SIRPB1-001     | signal-regulatory protein beta 1                                                                                                 | protein_cc | 9606 | 20:156438 | 7  |
| ENST000001SLAMF1-001     | signaling lymphocytic activation molecule family member 1                                                                        | protein_cc | 9606 | 1:1606081 | 3  |
| ENST000001SLAMF8-001     | SLAM family member 8                                                                                                             | protein_cc | 9606 | 1:1598267 | 3  |
| ENST000001SLC12A5-002    | solute carrier family 12 (potassium/chloride transporter), member 5                                                              | protein_cc | 9606 | 20:460292 | 12 |
| ENST000001SLC16A11-001   | solute carrier family 16, member 11                                                                                              | protein_cc | 9606 | 17:704163 | 11 |
| ENST000001SLC22A17-003   | solute carrier family 22, member 17                                                                                              | protein_cc | 9606 | 14:233463 | 9  |
| ENST000001SLC23A3-001    | solute carrier family 23, member 3                                                                                               | protein_cc | 9606 | 2:2191614 | 2  |
| ENST000001SLC25A4-001    | solute carrier family 25 (mitochondrial carrier; adenine nucleotide translocator), member 4                                      | protein_cc | 9606 | 4:1851432 | 32 |
| ENST000001SLC27A1-001    | solute carrier family 27 (fatty acid transporter), member 1                                                                      | protein_cc | 9606 | 19:174704 | 35 |
| ENST000001SLC2A4-001     | solute carrier family 2 (facilitated glucose transporter), member 4                                                              | protein_cc | 9606 | 17:728166 | 13 |
| ENST000001SLC35G3-001    | solute carrier family 35, member G3                                                                                              | protein_cc | 9606 | 17:351925 | 2  |
| ENST000001SLC5A4-001     | solute carrier family 5 (glucose activated ion channel), member 4                                                                | protein_cc | 9606 | 22:322184 | 38 |
| ENST000001SLC5A5-001     | solute carrier family 5 (sodium/iodide cotransporter), member 5                                                                  | protein_cc | 9606 | 19:178719 | 29 |
| ENST000001SLC6A19-001    | solute carrier family 6 (neutral amino acid transporter), member 19                                                              | protein_cc | 9606 | 5:1201595 | 2  |
| ENST000001SLC7A7-007     | solute carrier family 7 (amino acid transporter light chain, y+L system), member 7                                               | protein_cc | 9606 | 14:227732 | 13 |
| ENST000001SLC8B1-201     | solute carrier family 8 (sodium/lithium/calcium exchanger), member B1                                                            | protein_cc | 9606 | 12:113298 | 10 |
| ENST000001SMIM24-001     | small integral membrane protein 24                                                                                               | protein_cc | 9606 | 19:347398 | 11 |
| ENST000001SNAI2-201      | snail family zinc finger 2                                                                                                       | protein_cc | 9606 | 8:4891769 | 42 |
| ENST000001SNRPF-001      | small nuclear ribonucleoprotein polypeptide F                                                                                    | protein_cc | 9606 | 12:958589 | 41 |
| ENST000001SNX31-001      | sorting nexin 31                                                                                                                 | protein_cc | 9606 | 8:1005728 | 2  |
| ENST000001SOAT2-001      | sterol O-acetyltransferase 2                                                                                                     | protein_cc | 9606 | 12:531035 | 3  |
| ENST000001SORBS1-001     | sorbin and SH3 domain containing 1                                                                                               | protein_cc | 9606 | 10:953117 | 34 |
| ENST000001SOSTDC1-001    | sclerostin domain containing 1                                                                                                   | protein_cc | 9606 | 7:1646148 | 16 |
| ENST000001SOX2-001       | SRY (sex determining region Y)-box 2                                                                                             | protein_cc | 9606 | 3:1817119 | 34 |
| ENST000001SOX8-001       | SRY (sex determining region Y)-box 8                                                                                             | protein_cc | 9606 | 16:981808 | 39 |
| ENST000001SOX9-001       | SRY (sex determining region Y)-box 9                                                                                             | protein_cc | 9606 | 17:721210 | 12 |
| ENST000001SPATC1L-002    | spermatogenesis and centriole associated 1-like                                                                                  | protein_cc | 9606 | 21:461611 | 4  |
| ENST000001SPI1-004       | Spi-1 proto-oncogene                                                                                                             | protein_cc | 9606 | 11:473549 | 8  |
| ENST000001SPINK1-001     | serine peptidase inhibitor, Kazal type 1                                                                                         | protein_cc | 9606 | 5:1478245 | 4  |
| ENST000001SPINT2-001     | serine peptidase inhibitor, Kunitz type, 2                                                                                       | protein_cc | 9606 | 19:382644 | 31 |
| ENST000001SPON2-001      | spondin 2, extracellular matrix protein                                                                                          | protein_cc | 9606 | 4:1166932 | 5  |
| ENST000001SPP1-002       | secreted phosphoprotein 1                                                                                                        | protein_cc | 9606 | 4:8797566 | 2  |
| ENST000001SPSB3-007      | splA/ryanodine receptor domain and SOCS box containing 3                                                                         | protein_cc | 9606 | 16:177674 | 31 |
| ENST000001SPTBN5-001     | spectrin, beta, non-erythrocytic 5                                                                                               | protein_cc | 9606 | 15:418481 | 14 |
| ENST000001SPX-001        | spexin hormone                                                                                                                   | protein_cc | 9606 | 12:215263 | 13 |
| ENST000001SRP19-002      | signal recognition particle 19kDa                                                                                                | protein_cc | 9606 | 5:1128613 | 2  |
| ENST000001SSTR1-002      | somatostatin receptor 1                                                                                                          | protein_cc | 9606 | 14:382079 | 38 |
| ENST000001ST8IA3-001     | ST8 alpha-N-acetyl-neuraminidase alpha-2,8-sialyltransferase 3                                                                   | protein_cc | 9606 | 18:573508 | 9  |
| ENST000001STAP1-001      | signal transducing adaptor family member 1                                                                                       | protein_cc | 9606 | 4:6755872 | 2  |
| ENST000001STARD5-001     | STAR-related lipid transfer (START) domain containing 5                                                                          | protein_cc | 9606 | 15:813090 | 19 |
| ENST000001STOX1-002      | storkhead box 1                                                                                                                  | protein_cc | 9606 | 10:688275 | 11 |
| ENST000001STPG1-001      | sperm-tail PG-rich repeat containing 1                                                                                           | protein_cc | 9606 | 1:2435700 | 3  |
| ENST000001STR8-001       | stimulated by retinoic acid 8                                                                                                    | protein_cc | 9606 | 7:1352319 | 2  |
| ENST000001STX19-001      | syntaxin 19                                                                                                                      | protein_cc | 9606 | 3:9401436 | 15 |
| ENST000001STXBP6-006     | syntaxin binding protein 6 (amisyn)                                                                                              | protein_cc | 9606 | 14:248096 | 6  |
| ENST000001SULT2A1-001    | sulfotransferase family, cytosolic, 2A, dehydroepiandrosterone (DHEA)-preferring, member 1                                       | protein_cc | 9606 | 19:478704 | 22 |
| ENST000001SUPT3H-201     | suppressor of Ty 3 homolog ( <i>S. cerevisiae</i> )                                                                              | protein_cc | 9606 | 6:4482673 | 12 |
| ENST000001SYF2-001       | SYF2 pre-mRNA-splicing factor                                                                                                    | protein_cc | 9606 | 1:2522267 | 42 |
| ENST000001SYT7-001       | synaptotagmin VII                                                                                                                | protein_cc | 9606 | 11:615153 | 37 |
| ENST000001SYTL1-001      | synaptotagmin-like 1                                                                                                             | protein_cc | 9606 | 1:2734202 | 5  |
| ENST000001TACR1-001      | tachykinin receptor 1                                                                                                            | protein_cc | 9606 | 2:7504646 | 12 |
| ENST000001TAF1D-002      | TATA box binding protein (TBP)-associated factor, RNA polymerase I, D, 41kDa                                                     | nonsense   | 9606 | 11:937299 | 5  |
| ENST000001TAS2R4-001     | taste receptor, type 2, member 4                                                                                                 | protein_cc | 9606 | 7:1417784 | 39 |
| ENST000001TBC1D10A-001   | TBC1 domain family, member 10A                                                                                                   | protein_cc | 9606 | 22:302919 | 37 |
| ENST000001TBC1D13-001    | TBC1 domain family, member 13                                                                                                    | protein_cc | 9606 | 9:1287873 | 3  |
| ENST000001TBC1D27-001    | TBC1 domain family, member 27                                                                                                    | processed  | 9606 | 17:169229 | 2  |
| ENST000001TBCA-002       | tubulin folding cofactor A                                                                                                       | protein_cc | 9606 | 5:7769124 | 4  |
| ENST000001TBX21-001      | T-box 21                                                                                                                         | protein_cc | 9606 | 17:477332 | 11 |
| ENST000001TBX3-002       | T-box 3                                                                                                                          | protein_cc | 9606 | 12:114670 | 22 |
| ENST000001TBX6-201       | T-box 6                                                                                                                          | protein_cc | 9606 | 16:300857 | 27 |
| ENST000001TCF23-001      | transcription factor 23                                                                                                          | protein_cc | 9606 | 2:2714900 | 35 |
| ENST000001TCN2-001       | transcobalamin II                                                                                                                | protein_cc | 9606 | 22:306068 | 14 |



|                         |                                                                        |            |      |           |    |
|-------------------------|------------------------------------------------------------------------|------------|------|-----------|----|
| ENST000001TDR6-001      | tudor domain containing 6                                              | protein_cc | 9606 | 6:4668812 | 19 |
| ENST000001TEKT2-001     | tektin 2 (testicular)                                                  | protein_cc | 9606 | 1:3608407 | 23 |
| ENST000001TENM4-001     | teneurin transmembrane protein 4                                       | protein_cc | 9606 | 11:786528 | 2  |
| ENST000001TEX29-002     | testis expressed 29                                                    | protein_cc | 9606 | 13:111320 | 15 |
| ENST000001TFF3-201      | trefoil factor 3 (intestinal)                                          | protein_cc | 9606 | 21:423120 | 9  |
| ENST000001TGM1-001      | transglutaminase 1                                                     | protein_cc | 9606 | 14:242491 | 32 |
| ENST000001THOP1-001     | thimet oligopeptidase 1                                                | protein_cc | 9606 | 19:278546 | 5  |
| ENST000001TIMP1-001     | TIMP metalloproteinase inhibitor 1                                     | protein_cc | 9606 | X:4758231 | 43 |
| ENST000001TIMP3-001     | TIMP metalloproteinase inhibitor 3                                     | protein_cc | 9606 | 22:328017 | 41 |
| ENST000001TIMP4-001     | TIMP metalloproteinase inhibitor 4                                     | protein_cc | 9606 | 3:1215305 | 26 |
| ENST000001TLR2-001      | toll-like receptor 2                                                   | protein_cc | 9606 | 4:1537015 | 40 |
| ENST000001TLR8-002      | toll-like receptor 8                                                   | protein_cc | 9606 | X:1290662 | 3  |
| ENST000001TM4SF18-001   | transmembrane 4 L six family member 18                                 | protein_cc | 9606 | 3:1493184 | 35 |
| ENST000001TM4SF5-001    | transmembrane 4 L six family member 5                                  | protein_cc | 9606 | 17:477189 | 6  |
| ENST000001TMEM132E-001  | transmembrane protein 132E                                             | protein_cc | 9606 | 17:345807 | 11 |
| ENST000001TMEM133-001   | transmembrane protein 133                                              | protein_cc | 9606 | 11:100991 | 27 |
| ENST000001TMEM145-001   | transmembrane protein 145                                              | protein_cc | 9606 | 19:423133 | 14 |
| ENST000001TMEM164-001   | transmembrane protein 164                                              | protein_cc | 9606 | X:1100031 | 2  |
| ENST000001TMEM176A-001  | transmembrane protein 176A                                             | protein_cc | 9606 | 7:1508005 | 2  |
| ENST000001TMEM176B-004  | transmembrane protein 176B                                             | protein_cc | 9606 | 7:1507912 | 6  |
| ENST000001TMEM178A-001  | transmembrane protein 178A                                             | protein_cc | 9606 | 2:3966591 | 8  |
| ENST000001TMEM256-001   | transmembrane protein 256                                              | protein_cc | 9606 | 17:740297 | 40 |
| ENST000001TMEM38A-001   | transmembrane protein 38A                                              | protein_cc | 9606 | 19:166611 | 42 |
| ENST000001TMEM60-001    | transmembrane protein 60                                               | protein_cc | 9606 | 7:7779372 | 42 |
| ENST000001TMEM86A-001   | transmembrane protein 86A                                              | protein_cc | 9606 | 11:186987 | 42 |
| ENST000001TMEM88-001    | transmembrane protein 88                                               | protein_cc | 9606 | 17:785506 | 43 |
| ENST000001TMSB4XP4-001  | thymosin beta 4, X-linked pseudogene 4                                 | processed  | 9606 | 9:1283421 | 43 |
| ENST000001TMSB4Y-001    | thymosin beta 4, Y-linked                                              | protein_cc | 9606 | Y:1370356 | 25 |
| ENST000001TMUB1-001     | transmembrane and ubiquitin-like domain containing 1                   | protein_cc | 9606 | 7:1510810 | 38 |
| ENST000001TNFAIP3-001   | tumor necrosis factor, alpha-induced protein 3                         | protein_cc | 9606 | 6:1378674 | 33 |
| ENST000001TNFAIP8L1-001 | tumor necrosis factor, alpha-induced protein 8-like 1                  | protein_cc | 9606 | 19:463951 | 43 |
| ENST000001TNFRSF11A-002 | tumor necrosis factor receptor superfamily, member 11a, NFkB activator | protein_cc | 9606 | 18:623252 | 11 |
| ENST000001TNFRSF17-001  | tumor necrosis factor receptor superfamily, member 17                  | protein_cc | 9606 | 16:119651 | 4  |
| ENST000001TNIP3-001     | TNFAIP3 interacting protein 3                                          | protein_cc | 9606 | 4:1211314 | 27 |
| ENST000001TNNI2-201     | troponin I type 2 (skeletal, fast)                                     | protein_cc | 9606 | 11:183969 | 5  |
| ENST000001TP53I13-001   | tumor protein p53 inducible protein 13                                 | protein_cc | 9606 | 17:295686 | 43 |
| ENST000001TPH1-001      | tryptophan hydroxylase 1                                               | protein_cc | 9606 | 11:180175 | 5  |
| ENST000001TPRXL-001     | tetra-peptide repeat homeobox-like                                     | protein_cc | 9606 | 3:1393740 | 5  |
| ENST000001TRAF4-001     | TNF receptor-associated factor 4                                       | protein_cc | 9606 | 17:287439 | 34 |
| ENST000001TRAPP2L-001   | trafficking protein particle complex 2-like                            | protein_cc | 9606 | 16:888570 | 15 |
| ENST000001TRAPP6A-002   | trafficking protein particle complex 6A                                | protein_cc | 9606 | 19:451629 | 27 |
| ENST000001TRIB2-001     | tribbles pseudokinase 2                                                | protein_cc | 9606 | 2:1271688 | 42 |
| ENST000001TRIM45-001    | tripartite motif containing 45                                         | protein_cc | 9606 | 1:1171110 | 34 |
| ENST000001TRIM74-002    | tripartite motif containing 74                                         | protein_cc | 9606 | 7:7295948 | 7  |
| ENST000001TRIM9-001     | tripartite motif containing 9                                          | protein_cc | 9606 | 14:509752 | 11 |
| ENST000001TRIML2-003    | tripartite motif family-like 2                                         | protein_cc | 9606 | 4:1880913 | 4  |
| ENST000001TRIP10-003    | thyroid hormone receptor interactor 10                                 | protein_cc | 9606 | 19:673972 | 6  |
| ENST000001TRMT61A-003   | tRNA methyltransferase 61 homolog A (S. cerevisiae)                    | protein_cc | 9606 | 14:103529 | 3  |
| ENST000001TRPA1-001     | transient receptor potential cation channel, subfamily A, member 1     | protein_cc | 9606 | 8:7202125 | 2  |
| ENST000001TSKS-001      | testis-specific serine kinase substrate                                | protein_cc | 9606 | 19:497397 | 9  |
| ENST000001TSPYL5-001    | TSPY-like 5                                                            | protein_cc | 9606 | 8:9727347 | 43 |
| ENST000001TTC9-001      | tetratricopeptide repeat domain 9                                      | protein_cc | 9606 | 14:706417 | 39 |
| ENST000001TTR-001       | transthyretin                                                          | protein_cc | 9606 | 18:315917 | 3  |
| ENST000001TTY14-001     | testis-specific transcript, Y-linked 14 (non-protein coding)           | lincRNA    | 9606 | Y:1887250 | 22 |
| ENST000001TXLNGY-012    | taxilin gamma pseudogene, Y-linked                                     | processed  | 9606 | Y:1959245 | 22 |
| ENST000001UACA-001      | uveal autoantigen with coiled-coil domains and ankyrin repeats         | protein_cc | 9606 | 15:706545 | 33 |
| ENST000001UBA5-201      | ubiquitin-like modifier activating enzyme 5                            | protein_cc | 9606 | 3:1326544 | 2  |
| ENST000001UBASH3A-001   | ubiquitin associated and SH3 domain containing A                       | protein_cc | 9606 | 21:424039 | 4  |
| ENST000001UBE2N-001     | ubiquitin-conjugating enzyme E2N                                       | protein_cc | 9606 | 12:934056 | 9  |
| ENST000001UBE3D-004     | ubiquitin protein ligase E3D                                           | nonsense   | 9606 | 6:8289239 | 3  |
| ENST000001UBQLN3-001    | ubiquilin 3                                                            | protein_cc | 9606 | 11:550730 | 7  |
| ENST000001UCN-001       | urocortin                                                              | protein_cc | 9606 | 2:2730740 | 35 |
| ENST000001UCP3-001      | uncoupling protein 3 (mitochondrial, proton carrier)                   | protein_cc | 9606 | 11:740002 | 31 |
| ENST000001UGT2B4-001    | UDP glucuronosyltransferase 2 family, polypeptide B4                   | protein_cc | 9606 | 4:6948016 | 2  |
| ENST000001UGT2B7-001    | UDP glucuronosyltransferase 2 family, polypeptide B7                   | protein_cc | 9606 | 4:6909647 | 3  |
| ENST000001UNC93B1-001   | unc-93 homolog B1 (C. elegans)                                         | protein_cc | 9606 | 11:679911 | 43 |
| ENST000001UNC93B2-001   | unc-93 homolog B2 pseudogene (C. elegans)                              | processed  | 9606 | 7:6855485 | 6  |
| ENST000001UPK1A-001     | uropod protein 1A                                                      | protein_cc | 9606 | 19:356668 | 9  |
| ENST000001UPP2-001      | uridine phosphorylase 2                                                | protein_cc | 9606 | 2:1581018 | 3  |
| ENST000001UROCI-001     | urocanate hydratase 1                                                  | protein_cc | 9606 | 3:1264812 | 6  |
| ENST000001USP47-005     | ubiquitin specific peptidase 47                                        | processed  | 9606 | 11:119504 | 15 |
| ENST000001UTF1-001      | undifferentiated embryonic cell transcription factor 1                 | protein_cc | 9606 | 10:133230 | 6  |
| ENST000001UTS2R-001     | urotensin 2 receptor                                                   | protein_cc | 9606 | 17:823742 | 7  |
| ENST000001VAMP8-001     | vesicle-associated membrane protein 8                                  | protein_cc | 9606 | 2:8557749 | 44 |
| ENST000001VENTX-001     | VENT homeobox                                                          | protein_cc | 9606 | 10:133237 | 23 |
| ENST000001VEZT-201      | vezatin, adherens junctions transmembrane protein                      | protein_cc | 9606 | 12:952663 | 3  |
| ENST000001VN1R1-001     | vomerol nasal 1 receptor 1                                             | protein_cc | 9606 | 19:574547 | 5  |
| ENST000001VPREB1-002    | pre-B lymphocyte 1                                                     | protein_cc | 9606 | 22:222447 | 2  |
| ENST000001VPS28-201     | vacuolar protein sorting 28 homolog (S. cerevisiae)                    | protein_cc | 9606 | 8:1444236 | 23 |
| ENST000001VSI2G-001     | V-set and immunoglobulin domain containing 2                           | protein_cc | 9606 | 11:124747 | 32 |
| ENST000001VSTM4-002     | V-set and transmembrane domain containing 4                            | protein_cc | 9606 | 10:491021 | 16 |
| ENST000001WNT11-001     | wingless-type MMTV integration site family, member 11                  | protein_cc | 9606 | 11:761863 | 21 |
| ENST000001WNT2-002      | wingless-type MMTV integration site family member 2                    | protein_cc | 9606 | 7:1127766 | 7  |
| ENST000001WNT4-001      | wingless-type MMTV integration site family, member 4                   | protein_cc | 9606 | 1:2211730 | 34 |
| ENST000001WSB1-001      | WD repeat and SOCS box containing 1                                    | protein_cc | 9606 | 17:272940 | 30 |
| ENST000001WWC1-001      | WW and C2 domain containing 1                                          | protein_cc | 9606 | 5:1682916 | 30 |
| ENST000001XKR4-001      | XK, Kell blood group complex subunit-related family, member 4          | protein_cc | 9606 | 8:5510238 | 42 |

|                              |                                                                       |            |      |           |    |
|------------------------------|-----------------------------------------------------------------------|------------|------|-----------|----|
| ENST000001XYLT1-001          | xylosyltransferase I                                                  | protein_cc | 9606 | 16:171017 | 34 |
| ENST000001YPELS-001          | yippee-like 5 (Drosophila)                                            | protein_cc | 9606 | 2:3014696 | 41 |
| ENST000001ZAP70-001          | zeta-chain (TCR) associated protein kinase 70kDa                      | protein_cc | 9606 | 2:9771356 | 6  |
| ENST000001ZBTB46-001         | zinc finger and BTB domain containing 46                              | protein_cc | 9606 | 20:637436 | 38 |
| ENST000001ZCCHC6-003         | zinc finger, CCHC domain containing 6                                 | protein_cc | 9606 | 9:8628773 | 33 |
| ENST000001ZDHHHC8P1-001      | zinc finger, DHHC-type containing 8 pseudogene 1                      | processed  | 9606 | 22:233906 | 4  |
| ENST000001ZFPM1-001          | zinc finger protein, FOG family member 1                              | protein_cc | 9606 | 16:884533 | 42 |
| ENST000001ZFYVE19-008        | zinc finger, FYVE domain containing 19                                | protein_cc | 9606 | 15:408075 | 13 |
| ENST000001ZNF10-001          | zinc finger protein 10                                                | protein_cc | 9606 | 12:133130 | 18 |
| ENST000001ZNF276-001         | zinc finger protein 276                                               | protein_cc | 9606 | 16:897209 | 10 |
| ENST000001ZNF286B-003        | zinc finger protein 286B                                              | protein_cc | 9606 | 17:186584 | 32 |
| ENST000001ZNF350-001         | zinc finger protein 350                                               | protein_cc | 9606 | 19:519643 | 42 |
| ENST000001ZNF396-001         | zinc finger protein 396                                               | protein_cc | 9606 | 18:353666 | 28 |
| ENST000001ZNF404-201         | zinc finger protein 404                                               | protein_cc | 9606 | 19:438723 | 31 |
| ENST000001ZNF414-002         | zinc finger protein 414                                               | protein_cc | 9606 | 19:851133 | 37 |
| ENST000001ZNF423-201         | zinc finger protein 423                                               | protein_cc | 9606 | 16:494906 | 15 |
| ENST000001ZNF439-002         | zinc finger protein 439                                               | protein_cc | 9606 | 19:118659 | 22 |
| ENST000001ZNF497-002         | zinc finger protein 497                                               | protein_cc | 9606 | 19:583543 | 36 |
| ENST000001ZNF524-001         | zinc finger protein 524                                               | protein_cc | 9606 | 19:556003 | 38 |
| ENST000001ZNF544-201         | zinc finger protein 544                                               | protein_cc | 9606 | 19:582439 | 5  |
| ENST000001ZNF556-001         | zinc finger protein 556                                               | protein_cc | 9606 | 19:286733 | 38 |
| ENST000001ZNF579-001         | zinc finger protein 579                                               | protein_cc | 9606 | 19:555767 | 38 |
| ENST000001ZNF580-001         | zinc finger protein 580                                               | protein_cc | 9606 | 19:556408 | 15 |
| ENST000001ZNF688-001         | zinc finger protein 688                                               | protein_cc | 9606 | 16:305693 | 32 |
| ENST000001ZNF692-001         | zinc finger protein 692                                               | protein_cc | 9606 | 1:2488500 | 26 |
| ENST000001ZNF700-001         | zinc finger protein 700                                               | protein_cc | 9606 | 19:119250 | 38 |
| ENST000001ZNF771-001         | zinc finger protein 771                                               | protein_cc | 9606 | 16:304072 | 5  |
| ENST000001ZNF80-001          | zinc finger protein 80                                                | nonsense   | 9606 | 3:1142346 | 2  |
| ENST000001ZNF816-ZNF321P-001 | ZNF816-ZNF321P readthrough                                            | processed  | 9606 | 19:529271 | 14 |
| ENST000001ZNF862-001         | zinc finger protein 862                                               | protein_cc | 9606 | 7:1498383 | 31 |
| ENST000001ZNHIT2-001         | zinc finger, HIT-type containing 2                                    | protein_cc | 9606 | 11:651164 | 44 |
| ENST000001ZRSR2-001          | zinc finger (CCCH type), RNA-binding motif and serine/arginine rich 2 | protein_cc | 9606 | X:1579047 | 39 |

Table S8

Heart WCGNA Gene Color

| gene | hcolor             | Name                                                                             | Species      |
|------|--------------------|----------------------------------------------------------------------------------|--------------|
| 1    | 11715189_turquoise | microRNA 4738(MIR4738)                                                           | Homo sapiens |
| 2    | 11715193_turquoise | UNC homeobox(UNCX)                                                               | Homo sapiens |
| 3    | 11715207_turquoise | WDFY family member 4(WDFY4)                                                      | Homo sapiens |
| 4    | 11715239_turquoise | interferon induced transmembrane protein 3(IFITM3)                               | Homo sapiens |
| 5    | 11715291_turquoise | T-box 5(TBX5)                                                                    | Homo sapiens |
| 6    | 11715320_blue      | titin(TTN)                                                                       | Homo sapiens |
| 7    | 11715339_blue      | titin(TTN)                                                                       | Homo sapiens |
| 8    | 11715346_turquoise | Epstein-Barr virus induced 3(EBI3)                                               | Homo sapiens |
| 9    | 11715349_brown     | cytochrome c oxidase subunit 7C(COX7C)                                           | Homo sapiens |
| 10   | 11715359_turquoise | TIMP metalloproteinase inhibitor 1(TIMPI)                                        | Homo sapiens |
| 11   | 11715360_turquoise | TIMP metalloproteinase inhibitor 1(TIMPI)                                        | Homo sapiens |
| 12   | 11715363_turquoise | alpha-2-macroglobulin(A2M)                                                       | Homo sapiens |
| 13   | 11715367_turquoise | septin 2(SEPT2)                                                                  | Homo sapiens |
| 14   | 11715369_brown     | NDUFA4, mitochondrial complex associated(NDUFA4)                                 | Homo sapiens |
| 15   | 11715370_turquoise | galectin 3 binding protein(LGALS3BP)                                             | Homo sapiens |
| 16   | 11715377_brown     | cytochrome c oxidase subunit 4I1(COX4I1)                                         | Homo sapiens |
| 17   | 11715388_turquoise | cyclin dependent kinase inhibitor 1A(CDKN1A)                                     | Homo sapiens |
| 18   | 11715390_turquoise | FK506 binding protein 1A(FKBP1A)                                                 | Homo sapiens |
| 19   | 11715401_turquoise | interleukin enhancer binding factor 2(ILF2)                                      | Homo sapiens |
| 20   | 11715409_blue      | peroxiredoxin 2(PRX2)                                                            | Homo sapiens |
| 21   | 11715410_blue      | peroxiredoxin 2(PRX2)                                                            | Homo sapiens |
| 22   | 11715419_turquoise | lymphocyte antigen 6 complex, locus E(LY6E)                                      | Homo sapiens |
| 23   | 11715439_turquoise | death associated protein(DAP)                                                    | Homo sapiens |
| 24   | 11715451_turquoise | collagen type IV alpha 2 chain(COL4A2)                                           | Homo sapiens |
| 25   | 11715452_turquoise | collagen type IV alpha 2 chain(COL4A2)                                           | Homo sapiens |
| 26   | 11715453_turquoise | collagen type IV alpha 2 chain(COL4A2)                                           | Homo sapiens |
| 27   | 11715458_brown     | cytochrome c oxidase subunit 8A(COX8A)                                           | Homo sapiens |
| 28   | 11715459_brown     | cytochrome c oxidase subunit 8A(COX8A)                                           | Homo sapiens |
| 29   | 11715461_turquoise | lysozyme(LYZ)                                                                    | Homo sapiens |
| 30   | 11715462_turquoise | lysozyme(LYZ)                                                                    | Homo sapiens |
| 31   | 11715466_turquoise | Rho GDP dissociation inhibitor beta(ARHGDI1)                                     | Homo sapiens |
| 32   | 11715467_turquoise | Rho GDP dissociation inhibitor beta(ARHGDI1)                                     | Homo sapiens |
| 33   | 11715476_turquoise | DEAD-box helicase 17(DDX17)                                                      | Homo sapiens |
| 34   | 11715482_turquoise | BCL2 family apoptosis regulator(MCL1)                                            | Homo sapiens |
| 35   | 11715483_turquoise | BCL2 family apoptosis regulator(MCL1)                                            | Homo sapiens |
| 36   | 11715487_turquoise | BCL2 family apoptosis regulator(MCL1)                                            | Homo sapiens |
| 37   | 11715497_brown     | OXA1L, mitochondrial inner membrane protein(OXA1L)                               | Homo sapiens |
| 38   | 11715498_blue      | OXA1L, mitochondrial inner membrane protein(OXA1L)                               | Homo sapiens |
| 39   | 11715503_turquoise | LIM and SH3 protein 1(LASP1)                                                     | Homo sapiens |
| 40   | 11715524_turquoise | coactosin like F-actin binding protein 1(COTL1)                                  | Homo sapiens |
| 41   | 11715532_turquoise | interferon gamma receptor 2 (interferon gamma transducer 1)(IFNGR2)              | Homo sapiens |
| 42   | 11715541_turquoise | Thy-1 cell surface antigen(THY1)                                                 | Homo sapiens |
| 43   | 11715542_turquoise | Thy-1 cell surface antigen(THY1)                                                 | Homo sapiens |
| 44   | 11715583_turquoise | major histocompatibility complex, class II, DP alpha 1(HLA-DPA1)                 | Homo sapiens |
| 45   | 11715593_turquoise | tyrosine 3-monooxygenase/tryptophan 5-monooxygenase activation protein eta(YWHA) | Homo sapiens |
| 46   | 11715606_turquoise | TSC22 domain family member 1(TSC22D1)                                            | Homo sapiens |
| 47   | 11715608_turquoise | peptidylprolyl isomerase B(PIIB)                                                 | Homo sapiens |
| 48   | 11715616_brown     | NADH:ubiquinone oxidoreductase subunit AB1(NDUFB1)                               | Homo sapiens |

|    |                    |                                                                           |              |
|----|--------------------|---------------------------------------------------------------------------|--------------|
| 49 | 11715620_blue      | crystallin alpha B(CRYAB)                                                 | Homo sapiens |
| 50 | 11715623_turquoise | ring finger protein 114(RNF114)                                           | Homo sapiens |
| 51 | 11715624_turquoise | SH3 domain binding glutamate rich protein like(SH3BGRL)                   | Homo sapiens |
| 52 | 11715625_turquoise | SH3 domain binding glutamate rich protein like(SH3BGRL)                   | Homo sapiens |
| 53 | 11715638_turquoise | lysophosphatidylcholine acyltransferase 1(LPCAT1)                         | Homo sapiens |
| 54 | 11715644_turquoise | ATPase H+ transporting accessory protein 2(ATP6AP2)                       | Homo sapiens |
| 55 | 11715655_blue      | voltage dependent anion channel 1(VDAC1)                                  | Homo sapiens |
| 56 | 11715656_blue      | cytochrome c oxidase subunit 5A(COX5A)                                    | Homo sapiens |
| 57 | 11715665_turquoise | proteasome subunit beta 8(PSMB8)                                          | Homo sapiens |
| 58 | 11715667_turquoise | tropomyosin 3(TPM3)                                                       | Homo sapiens |
| 59 | 11715670_turquoise | interferon induced transmembrane protein 1(IFITM1)                        | Homo sapiens |
| 60 | 11715671_turquoise | interferon induced transmembrane protein 1(IFITM1)                        | Homo sapiens |
| 61 | 11715684_turquoise | pyrophosphatase (inorganic) 1(PPA1)                                       | Homo sapiens |
| 62 | 11715685_turquoise | actin related protein 2/3 complex subunit 5(ARPC5)                        | Homo sapiens |
| 63 | 11715686_turquoise | actin related protein 2/3 complex subunit 5(ARPC5)                        | Homo sapiens |
| 64 | 11715687_turquoise | actin related protein 2/3 complex subunit 5(ARPC5)                        | Homo sapiens |
| 65 | 11715691_turquoise | ZFP36 ring finger protein(ZFP36)                                          | Homo sapiens |
| 66 | 11715694_brown     | cytochrome c oxidase subunit 7B(COX7B)                                    | Homo sapiens |
| 67 | 11715695_brown     | cytochrome c oxidase subunit 7B(COX7B)                                    | Homo sapiens |
| 68 | 11715710_turquoise | cathepsin C(CTSC)                                                         | Homo sapiens |
| 69 | 11715716_turquoise | moesin(MSN)                                                               | Homo sapiens |
| 70 | 11715717_turquoise | moesin(MSN)                                                               | Homo sapiens |
| 71 | 11715722_turquoise | golgi membrane protein 1(GOLM1)                                           | Homo sapiens |
| 72 | 11715742_turquoise | regulator of chromosome condensation 2(RCC2)                              | Homo sapiens |
| 73 | 11715743_turquoise | regulator of chromosome condensation 2(RCC2)                              | Homo sapiens |
| 74 | 11715744_brown     | ATP synthase, H+ transporting, mitochondrial Fo complex subunit F6(ATP5J) | Homo sapiens |
| 75 | 11715767_turquoise | acetyl-CoA acyltransferase 2(ACAA2)                                       | Homo sapiens |
| 76 | 11715770_turquoise | SET nuclear proto-oncogene(SET)                                           | Homo sapiens |
| 77 | 11715772_brown     | mitochondrial ribosomal protein L13(MRPL13)                               | Homo sapiens |
| 78 | 11715788_turquoise | solute carrier family 40 member 1(SLC40A1)                                | Homo sapiens |
| 79 | 11715817_turquoise | ZFP36 ring finger protein like 2(ZFP36L2)                                 | Homo sapiens |
| 80 | 11715818_turquoise | ZFP36 ring finger protein like 2(ZFP36L2)                                 | Homo sapiens |
| 81 | 11715827_turquoise | polyhomeotic homolog 1(PHC1)                                              | Homo sapiens |
| 82 | 11715836_turquoise | proteasome subunit alpha 3(PSMA3)                                         | Homo sapiens |
| 83 | 11715839_turquoise | succinate dehydrogenase complex subunit C(SDHC)                           | Homo sapiens |
| 84 | 11715855_turquoise | prolylcarboxypeptidase(PRCP)                                              | Homo sapiens |
| 85 | 11715856_turquoise | prolylcarboxypeptidase(PRCP)                                              | Homo sapiens |
| 86 | 11715867_brown     | mitochondrial ribosomal protein L41(MRPL41)                               | Homo sapiens |
| 87 | 11715868_turquoise | TERF1 interacting nuclear factor 2(TINF2)                                 | Homo sapiens |
| 88 | 11715869_turquoise | TERF1 interacting nuclear factor 2(TINF2)                                 | Homo sapiens |
| 89 | 11715874_brown     | ATP synthase, H+ transporting, mitochondrial Fo complex subunit D(ATP5H)  | Homo sapiens |
| 90 | 11715881_blue      | death associated protein 3(DAP3)                                          | Homo sapiens |
| 91 | 11715883_blue      | death associated protein 3(DAP3)                                          | Homo sapiens |
| 92 | 11715884_turquoise | transmembrane protein 248(TMEM248)                                        | Homo sapiens |
| 93 | 11715893_turquoise | interferon alpha inducible protein 27(IFI27)                              | Homo sapiens |
| 94 | 11715897_turquoise | scavenger receptor class B member 2(SCARB2)                               | Homo sapiens |
| 95 | 11715899_brown     | succinate-CoA ligase alpha subunit(SUCLG1)                                | Homo sapiens |
| 96 | 11715908_turquoise | myosin VI(MYO6)                                                           | Homo sapiens |
| 97 | 11715915_turquoise | CD44 molecule (Indian blood group)(CD44)                                  | Homo sapiens |
| 98 | 11715916_turquoise | CD44 molecule (Indian blood group)(CD44)                                  | Homo sapiens |

|     |                    |                                                                                      |              |
|-----|--------------------|--------------------------------------------------------------------------------------|--------------|
| 99  | 11715917_turquoise | CD44 molecule (Indian blood group)(CD44)                                             | Homo sapiens |
| 100 | 11715919_turquoise | SH3 domain binding glutamate rich protein like 3(SH3BGRL3)                           | Homo sapiens |
| 101 | 11715921_turquoise | septin 9(SEPT9)                                                                      | Homo sapiens |
| 102 | 11715922_turquoise | septin 9(SEPT9)                                                                      | Homo sapiens |
| 103 | 11715925_turquoise | translocation associated membrane protein 1(TRAM1)                                   | Homo sapiens |
| 104 | 11715931_turquoise | serum/glucocorticoid regulated kinase 1(SGK1)                                        | Homo sapiens |
| 105 | 11715935_turquoise | neurobeachin like 2(NBEAL2)                                                          | Homo sapiens |
| 106 | 11715936_turquoise | neurobeachin like 2(NBEAL2)                                                          | Homo sapiens |
| 107 | 11715948_turquoise | potassium channel tetramerization domain containing 12(KCTD12)                       | Homo sapiens |
| 108 | 11715949_turquoise | potassium channel tetramerization domain containing 12(KCTD12)                       | Homo sapiens |
| 109 | 11715966_turquoise | abhydrolase domain containing 17A(ABHD17A)                                           | Homo sapiens |
| 110 | 11715973_blue      | mitochondrial fission regulator 1 like(MTFR1L)                                       | Homo sapiens |
| 111 | 11715988_brown     | ATP synthase, H+ transporting, mitochondrial Fo complex subunit C1 (subunit 9)(ATP5G | Homo sapiens |
| 112 | 11715994_turquoise | inhibitor of DNA binding 2, HLH protein(ID2)                                         | Homo sapiens |
| 113 | 11715995_brown     | mitochondrial ribosomal protein L16(MRPL16)                                          | Homo sapiens |
| 114 | 11715997_brown     | NADH:ubiquinone oxidoreductase subunit C1(NDUFC1)                                    | Homo sapiens |
| 115 | 11716012_turquoise | TNF alpha induced protein 1(TNFAIP1)                                                 | Homo sapiens |
| 116 | 11716015_turquoise | CKLF like MARVEL transmembrane domain containing 3(CMTM3)                            | Homo sapiens |
| 117 | 11716018_turquoise | RAB31, member RAS oncogene family(RAB31)                                             | Homo sapiens |
| 118 | 11716019_turquoise | RAB31, member RAS oncogene family(RAB31)                                             | Homo sapiens |
| 119 | 11716029_brown     | NADH:ubiquinone oxidoreductase subunit B9(NDUFB9)                                    | Homo sapiens |
| 120 | 11716030_brown     | NADH:ubiquinone oxidoreductase subunit B9(NDUFB9)                                    | Homo sapiens |
| 121 | 11716031_turquoise | ADP ribosylation factor 3(ARF3)                                                      | Homo sapiens |
| 122 | 11716034_turquoise | bone marrow stromal cell antigen 2(BST2)                                             | Homo sapiens |
| 123 | 11716035_turquoise | bone marrow stromal cell antigen 2(BST2)                                             | Homo sapiens |
| 124 | 11716036_turquoise | bone marrow stromal cell antigen 2(BST2)                                             | Homo sapiens |
| 125 | 11716047_brown     | chromosome 21 open reading frame 33(C21orf33)                                        | Homo sapiens |
| 126 | 11716055_turquoise | stathmin 3(STMN3)                                                                    | Homo sapiens |
| 127 | 11716061_brown     | family with sequence similarity 162 member A(FAM162A)                                | Homo sapiens |
| 128 | 11716062_turquoise | tenascin C(TNC)                                                                      | Homo sapiens |
| 129 | 11716063_turquoise | tenascin C(TNC)                                                                      | Homo sapiens |
| 130 | 11716071_turquoise | Pim-3 proto-oncogene, serine/threonine kinase(PIM3)                                  | Homo sapiens |
| 131 | 11716072_turquoise | ATPase H+ transporting V1 subunit B2(ATP6V1B2)                                       | Homo sapiens |
| 132 | 11716093_turquoise | Kruppel like factor 6(KLF6)                                                          | Homo sapiens |
| 133 | 11716095_turquoise | Kruppel like factor 6(KLF6)                                                          | Homo sapiens |
| 134 | 11716103_turquoise | proliferating cell nuclear antigen(PCNA)                                             | Homo sapiens |
| 135 | 11716115_turquoise | ZFP36 ring finger protein like 1(ZFP36L1)                                            | Homo sapiens |
| 136 | 11716116_brown     | NADH:ubiquinone oxidoreductase subunit S6(NDUFS6)                                    | Homo sapiens |
| 137 | 11716118_turquoise | protein disulfide isomerase family A member 4(PDIA4)                                 | Homo sapiens |
| 138 | 11716119_turquoise | protein disulfide isomerase family A member 4(PDIA4)                                 | Homo sapiens |
| 139 | 11716121_turquoise | apoptosis inhibitor 5(API5)                                                          | Homo sapiens |
| 140 | 11716135_turquoise | major vault protein(MVP)                                                             | Homo sapiens |
| 141 | 11716167_turquoise | MX dynamin like GTPase 1(MX1)                                                        | Homo sapiens |
| 142 | 11716171_turquoise | lamin B2(LMNB2)                                                                      | Homo sapiens |
| 143 | 11716181_turquoise | mediator complex subunit 15(MED15)                                                   | Homo sapiens |
| 144 | 11716186_turquoise | activated leukocyte cell adhesion molecule(ALCAM)                                    | Homo sapiens |
| 145 | 11716202_blue      | phosphofructokinase, muscle(PFKM)                                                    | Homo sapiens |
| 146 | 11716205_blue      | NADH:ubiquinone oxidoreductase subunit A8(NDUFA8)                                    | Homo sapiens |
| 147 | 11716211_blue      | 3-hydroxyisobutyrate dehydrogenase(HIBADH)                                           | Homo sapiens |
| 148 | 11716212_blue      | 3-hydroxyisobutyrate dehydrogenase(HIBADH)                                           | Homo sapiens |

|     |                    |                                                                                |              |
|-----|--------------------|--------------------------------------------------------------------------------|--------------|
| 149 | 11716226_turquoise | LIM domain and actin binding 1(LIMA1)                                          | Homo sapiens |
| 150 | 11716243_brown     | protein phosphatase 1 regulatory subunit 16A(PPP1R16A)                         | Homo sapiens |
| 151 | 11716245_turquoise | WAS protein family member 2(WASF2)                                             | Homo sapiens |
| 152 | 11716249_turquoise | transmembrane p24 trafficking protein 9(TMED9)                                 | Homo sapiens |
| 153 | 11716267_turquoise | adenylate kinase 1(AK1)                                                        | Homo sapiens |
| 154 | 11716268_turquoise | adenylate kinase 1(AK1)                                                        | Homo sapiens |
| 155 | 11716274_turquoise | endosulfine alpha(ENSA)                                                        | Homo sapiens |
| 156 | 11716275_turquoise | chromobox 5(CBX5)                                                              | Homo sapiens |
| 157 | 11716283_turquoise | poly(A) RNA polymerase D7, non-canonical(PAPD7)                                | Homo sapiens |
| 158 | 11716284_turquoise | glyoxalase I(GLO1)                                                             | Homo sapiens |
| 159 | 11716288_turquoise | extended synaptotagmin 1(ESYT1)                                                | Homo sapiens |
| 160 | 11716294_turquoise | cysteinyl-tRNA synthetase(CARS)                                                | Homo sapiens |
| 161 | 11716307_turquoise | ubiquinol-cytochrome c reductase, complex III subunit XI(UQCR11)               | Homo sapiens |
| 162 | 11716315_brown     | mitochondrial ribosomal protein L15(MRPL15)                                    | Homo sapiens |
| 163 | 11716337_turquoise | insulin induced gene 1(INSIG1)                                                 | Homo sapiens |
| 164 | 11716339_turquoise | insulin induced gene 1(INSIG1)                                                 | Homo sapiens |
| 165 | 11716340_brown     | NADH:ubiquinone oxidoreductase subunit S4(NDUFS4)                              | Homo sapiens |
| 166 | 11716350_brown     | HSPE1-MOB4 readthrough(HSPE1-MOB4)                                             | Homo sapiens |
| 167 | 11716355_brown     | NADH:ubiquinone oxidoreductase subunit A11(NDUFA11)                            | Homo sapiens |
| 168 | 11716358_turquoise | protein regulator of cytokinesis 1(PRC1)                                       | Homo sapiens |
| 169 | 11716367_turquoise | proline rich 13(PRR13)                                                         | Homo sapiens |
| 170 | 11716368_turquoise | proline rich 13(PRR13)                                                         | Homo sapiens |
| 171 | 11716377_turquoise | granulin precursor(GRN)                                                        | Homo sapiens |
| 172 | 11716380_blue      | mitochondrial pyruvate carrier 2(MPC2)                                         | Homo sapiens |
| 173 | 11716381_blue      | mitochondrial pyruvate carrier 2(MPC2)                                         | Homo sapiens |
| 174 | 11716384_turquoise | C-C motif chemokine ligand 2(CCL2)                                             | Homo sapiens |
| 175 | 11716385_turquoise | transforming growth factor beta 1(TGFB1)                                       | Homo sapiens |
| 176 | 11716392_blue      | alcohol dehydrogenase 5 (class III), chi polypeptide(ADH5)                     | Homo sapiens |
| 177 | 11716395_turquoise | adhesion G protein-coupled receptor G1(ADGRG1)                                 | Homo sapiens |
| 178 | 11716403_turquoise | eukaryotic translation initiation factor 4E binding protein 2(EIF4EBP2)        | Homo sapiens |
| 179 | 11716415_brown     | NADH:ubiquinone oxidoreductase subunit B8(NDUFB8)                              | Homo sapiens |
| 180 | 11716416_turquoise | complement C1q A chain(C1QA)                                                   | Homo sapiens |
| 181 | 11716432_brown     | MNAT1, CDK activating kinase assembly factor(MNAT1)                            | Homo sapiens |
| 182 | 11716442_brown     | RNA polymerase II subunit L(POLR2L)                                            | Homo sapiens |
| 183 | 11716448_blue      | nudix hydrolase 9(NUDT9)                                                       | Homo sapiens |
| 184 | 11716450_turquoise | raftlin, lipid raft linker 1(RFTN1)                                            | Homo sapiens |
| 185 | 11716466_turquoise | iron-sulfur cluster assembly 1(ISCA1)                                          | Homo sapiens |
| 186 | 11716467_turquoise | iron-sulfur cluster assembly 1(ISCA1)                                          | Homo sapiens |
| 187 | 11716468_blue      | iron-sulfur cluster assembly 1(ISCA1)                                          | Homo sapiens |
| 188 | 11716470_turquoise | ubiquinol-cytochrome c reductase binding protein(UQCRB)                        | Homo sapiens |
| 189 | 11716472_brown     | Raf-1 proto-oncogene, serine/threonine kinase(RAF1)                            | Homo sapiens |
| 190 | 11716479_turquoise | coagulation factor XIII A chain(F13A1)                                         | Homo sapiens |
| 191 | 11716485_turquoise | serine/threonine kinase 38(STK38)                                              | Homo sapiens |
| 192 | 11716513_turquoise | molybdenum cofactor synthesis 2(MOCS2)                                         | Homo sapiens |
| 193 | 11716519_brown     | short chain dehydrogenase/reductase family 39U member 1(SDR39U1)               | Homo sapiens |
| 194 | 11716533_turquoise | palmitoyl-protein thioesterase 1(PPT1)                                         | Homo sapiens |
| 195 | 11716534_turquoise | palmitoyl-protein thioesterase 1(PPT1)                                         | Homo sapiens |
| 196 | 11716554_turquoise | major histocompatibility complex, class II, DM alpha(HLA-DMA)                  | Homo sapiens |
| 197 | 11716562_blue      | aminoacyl tRNA synthetase complex interacting multifunctional protein 2(AIMP2) | Homo sapiens |
| 198 | 11716563_brown     | aminoacyl tRNA synthetase complex interacting multifunctional protein 2(AIMP2) | Homo sapiens |

|     |                    |                                                                                 |              |
|-----|--------------------|---------------------------------------------------------------------------------|--------------|
| 199 | 11716564_turquoise | serologically defined colon cancer antigen 3(SDCCAG3)                           | Homo sapiens |
| 200 | 11716567_turquoise | proline rich coiled-coil 2C(PRRC2C)                                             | Homo sapiens |
| 201 | 11716598_turquoise | charged multivesicular body protein 1A(CHMP1A)                                  | Homo sapiens |
| 202 | 11716599_turquoise | charged multivesicular body protein 1A(CHMP1A)                                  | Homo sapiens |
| 203 | 11716606_brown     | stomatin like 2(STOML2)                                                         | Homo sapiens |
| 204 | 11716617_brown     | mitochondrial ribosomal protein L36(MRPL36)                                     | Homo sapiens |
| 205 | 11716618_turquoise | SS18 like 2(SS18L2)                                                             | Homo sapiens |
| 206 | 11716633_turquoise | transmembrane protein 50A(TMEM50A)                                              | Homo sapiens |
| 207 | 11716638_turquoise | collagen type IV alpha 1 chain(COL4A1)                                          | Homo sapiens |
| 208 | 11716639_turquoise | collagen type IV alpha 1 chain(COL4A1)                                          | Homo sapiens |
| 209 | 11716640_turquoise | proteasome subunit beta 10(PSMB10)                                              | Homo sapiens |
| 210 | 11716641_turquoise | proteasome subunit beta 10(PSMB10)                                              | Homo sapiens |
| 211 | 11716646_turquoise | histocompatibility minor 13(HM13)                                               | Homo sapiens |
| 212 | 11716647_turquoise | histocompatibility minor 13(HM13)                                               | Homo sapiens |
| 213 | 11716650_turquoise | ubiquitin conjugating enzyme E2 Z(UBE2Z)                                        | Homo sapiens |
| 214 | 11716651_turquoise | ubiquitin conjugating enzyme E2 Z(UBE2Z)                                        | Homo sapiens |
| 215 | 11716653_turquoise | echinoderm microtubule associated protein like 4(EML4)                          | Homo sapiens |
| 216 | 11716654_turquoise | echinoderm microtubule associated protein like 4(EML4)                          | Homo sapiens |
| 217 | 11716662_turquoise | sushi domain containing 6(SUSD6)                                                | Homo sapiens |
| 218 | 11716666_turquoise | inhibitor of DNA binding 3, HLH protein(ID3)                                    | Homo sapiens |
| 219 | 11716682_turquoise | solute carrier family 39 member 9(SLC39A9)                                      | Homo sapiens |
| 220 | 11716683_turquoise | solute carrier family 39 member 9(SLC39A9)                                      | Homo sapiens |
| 221 | 11716694_grey      | tetraspanin 6(TSPAN6)                                                           | Homo sapiens |
| 222 | 11716700_brown     | SNAP associated protein(SNAPIN)                                                 | Homo sapiens |
| 223 | 11716733_turquoise | interferon regulatory factor 1(IRF1)                                            | Homo sapiens |
| 224 | 11716734_turquoise | interferon regulatory factor 1(IRF1)                                            | Homo sapiens |
| 225 | 11716739_turquoise | GRAM domain containing 1A(GRAMD1A)                                              | Homo sapiens |
| 226 | 11716746_turquoise | family with sequence similarity 60 member A(FAM60A)                             | Homo sapiens |
| 227 | 11716759_turquoise | caspase 4(CASP4)                                                                | Homo sapiens |
| 228 | 11716760_turquoise | caspase 4(CASP4)                                                                | Homo sapiens |
| 229 | 11716765_turquoise | IQ motif containing GTPase activating protein 1(IQGAP1)                         | Homo sapiens |
| 230 | 11716766_turquoise | IQ motif containing GTPase activating protein 1(IQGAP1)                         | Homo sapiens |
| 231 | 11716767_turquoise | IQ motif containing GTPase activating protein 1(IQGAP1)                         | Homo sapiens |
| 232 | 11716771_turquoise | salt inducible kinase 1(SIK1)                                                   | Homo sapiens |
| 233 | 11716774_turquoise | retinoic acid induced 14(RAI14)                                                 | Homo sapiens |
| 234 | 11716775_turquoise | retinoic acid induced 14(RAI14)                                                 | Homo sapiens |
| 235 | 11716787_turquoise | beta-1,4-glucuronyltransferase 1(B4GAT1)                                        | Homo sapiens |
| 236 | 11716788_turquoise | beta-1,4-glucuronyltransferase 1(B4GAT1)                                        | Homo sapiens |
| 237 | 11716792_turquoise | uncharacterized LOC440034(DKFZp686K1684)                                        | Homo sapiens |
| 238 | 11716793_turquoise | cyclin B2(CCNB2)                                                                | Homo sapiens |
| 239 | 11716794_turquoise | myosin light chain 6(MYL6)                                                      | Homo sapiens |
| 240 | 11716795_turquoise | interferon gamma inducible protein 16(IFI16)                                    | Homo sapiens |
| 241 | 11716796_turquoise | interferon gamma inducible protein 16(IFI16)                                    | Homo sapiens |
| 242 | 11716797_turquoise | lamin B receptor(LBR)                                                           | Homo sapiens |
| 243 | 11716800_turquoise | Fas associated via death domain(FADD)                                           | Homo sapiens |
| 244 | 11716828_turquoise | NPC intracellular cholesterol transporter 2(NPC2)                               | Homo sapiens |
| 245 | 11716842_turquoise | CD53 molecule(CD53)                                                             | Homo sapiens |
| 246 | 11716846_turquoise | membrane spanning 4-domains A6A(MS4A6A)                                         | Homo sapiens |
| 247 | 11716847_turquoise | solute carrier family 43 member 3(SLC43A3)                                      | Homo sapiens |
| 248 | 11716848_turquoise | phosphatidylinositol-3,4,5-trisphosphate dependent Rac exchange factor 1(PREX1) | Homo sapiens |

|     |                    |                                                                                 |              |
|-----|--------------------|---------------------------------------------------------------------------------|--------------|
| 249 | 11716849_turquoise | phosphatidylinositol-3,4,5-trisphosphate dependent Rac exchange factor 1(PREX1) | Homo sapiens |
| 250 | 11716850_turquoise | major facilitator superfamily domain containing 14B(MFSD14B)                    | Homo sapiens |
| 251 | 11716859_blue      | electron transfer flavoprotein alpha subunit(ETFA)                              | Homo sapiens |
| 252 | 11716865_turquoise | solute carrier family 1 member 5(SLC1A5)                                        | Homo sapiens |
| 253 | 11716866_turquoise | solute carrier family 1 member 5(SLC1A5)                                        | Homo sapiens |
| 254 | 11716867_turquoise | fem-1 homolog A(FEM1A)                                                          | Homo sapiens |
| 255 | 11716868_turquoise | UTP18, small subunit processome component(UTP18)                                | Homo sapiens |
| 256 | 11716883_turquoise | RAP1B, member of RAS oncogene family(RAP1B)                                     | Homo sapiens |
| 257 | 11716888_turquoise | hexosaminidase subunit alpha(HEXA)                                              | Homo sapiens |
| 258 | 11716890_brown     | transmembrane protein 261(TMEM261)                                              | Homo sapiens |
| 259 | 11716895_turquoise | ISG15 ubiquitin-like modifier(ISG15)                                            | Homo sapiens |
| 260 | 11716900_brown     | ADP ribosylation factor like GTPase 3(ARL3)                                     | Homo sapiens |
| 261 | 11716901_turquoise | trans-golgi network protein 2(TGOLN2)                                           | Homo sapiens |
| 262 | 11716904_turquoise | trans-golgi network protein 2(TGOLN2)                                           | Homo sapiens |
| 263 | 11716908_turquoise | ribonuclease T2(RNASET2)                                                        | Homo sapiens |
| 264 | 11716918_turquoise | N-acetylglucosamine kinase(NAGK)                                                | Homo sapiens |
| 265 | 11716920_turquoise | plasmalemma vesicle associated protein(PLVAP)                                   | Homo sapiens |
| 266 | 11716935_brown     | superoxide dismutase 1, soluble(SOD1)                                           | Homo sapiens |
| 267 | 11716938_turquoise | Sec61 translocon beta subunit(SEC61B)                                           | Homo sapiens |
| 268 | 11716939_turquoise | heme oxygenase 1(HMOX1)                                                         | Homo sapiens |
| 269 | 11716941_turquoise | tribbles pseudokinase 2(TRIB2)                                                  | Homo sapiens |
| 270 | 11716945_turquoise | twinfilin actin binding protein 1(TWF1)                                         | Homo sapiens |
| 271 | 11716953_brown     | transmembrane protein 126A(TMEM126A)                                            | Homo sapiens |
| 272 | 11716962_turquoise | protein phosphatase, Mg <sup>2+</sup> /Mn <sup>2+</sup> dependent 1F(PPM1F)     | Homo sapiens |
| 273 | 11716963_turquoise | protein phosphatase, Mg <sup>2+</sup> /Mn <sup>2+</sup> dependent 1F(PPM1F)     | Homo sapiens |
| 274 | 11716972_turquoise | N-ethylmaleimide sensitive factor, vesicle fusing ATPase(NSF)                   | Homo sapiens |
| 275 | 11716984_brown     | paroxysmal nonkinesigenic dyskinesia(PNKD)                                      | Homo sapiens |
| 276 | 11716986_turquoise | general transcription factor IIB(GTF2B)                                         | Homo sapiens |
| 277 | 11716993_turquoise | colony stimulating factor 1 receptor(CSF1R)                                     | Homo sapiens |
| 278 | 11717012_turquoise | vesicle associated membrane protein 8(VAMP8)                                    | Homo sapiens |
| 279 | 11717045_turquoise | complement C2(C2)                                                               | Homo sapiens |
| 280 | 11717051_turquoise | signal sequence receptor subunit 1(SSR1)                                        | Homo sapiens |
| 281 | 11717060_brown     | 2,4-dienoyl-CoA reductase 1, mitochondrial(DEC1)                                | Homo sapiens |
| 282 | 11717104_turquoise | glyoxylate and hydroxypyruvate reductase(GRHPR)                                 | Homo sapiens |
| 283 | 11717114_turquoise | SPT16 homolog, facilitates chromatin remodeling subunit(SUPT16H)                | Homo sapiens |
| 284 | 11717127_turquoise | alanyl aminopeptidase, membrane(ANPEP)                                          | Homo sapiens |
| 285 | 11717153_turquoise | adipocyte plasma membrane associated protein(APMAP)                             | Homo sapiens |
| 286 | 11717160_turquoise | clathrin light chain A(CLTA)                                                    | Homo sapiens |
| 287 | 11717163_turquoise | cell division cycle 20(CDC20)                                                   | Homo sapiens |
| 288 | 11717167_turquoise | lysine demethylase 2A(KDM2A)                                                    | Homo sapiens |
| 289 | 11717178_turquoise | signal transducer and activator of transcription 5A(STAT5A)                     | Homo sapiens |
| 290 | 11717188_turquoise | DnaJ heat shock protein family (Hsp40) member A1(DNAJA1)                        | Homo sapiens |
| 291 | 11717189_turquoise | DnaJ heat shock protein family (Hsp40) member A1(DNAJA1)                        | Homo sapiens |
| 292 | 11717211_turquoise | neogenin 1(NEO1)                                                                | Homo sapiens |
| 293 | 11717217_turquoise | serine/threonine kinase 10(STK10)                                               | Homo sapiens |
| 294 | 11717218_turquoise | serine/threonine kinase 10(STK10)                                               | Homo sapiens |
| 295 | 11717228_turquoise | cerebellar degeneration-related protein 2(LOC101060399)                         | Homo sapiens |
| 296 | 11717251_brown     | NADH:ubiquinone oxidoreductase subunit B11(NDUFB11)                             | Homo sapiens |
| 297 | 11717252_brown     | NADH:ubiquinone oxidoreductase subunit B11(NDUFB11)                             | Homo sapiens |
| 298 | 11717256_turquoise | Pim-1 proto-oncogene, serine/threonine kinase(PIM1)                             | Homo sapiens |



|     |                    |                                                                       |              |
|-----|--------------------|-----------------------------------------------------------------------|--------------|
| 299 | 11717257_turquoise | Pim-1 proto-oncogene, serine/threonine kinase(PIM1)                   | Homo sapiens |
| 300 | 11717281_turquoise | ArfGAP with SH3 domain, ankyrin repeat and PH domain 1(ASAP1)         | Homo sapiens |
| 301 | 11717282_turquoise | ArfGAP with SH3 domain, ankyrin repeat and PH domain 1(ASAP1)         | Homo sapiens |
| 302 | 11717293_turquoise | serine and arginine rich splicing factor 7(SRSF7)                     | Homo sapiens |
| 303 | 11717296_turquoise | leucine rich pentatricopeptide repeat containing(LRPPRC)              | Homo sapiens |
| 304 | 11717297_blue      | leucine rich pentatricopeptide repeat containing(LRPPRC)              | Homo sapiens |
| 305 | 11717299_turquoise | major histocompatibility complex, class II, DP beta 1(HLA-DPB1)       | Homo sapiens |
| 306 | 11717300_turquoise | major histocompatibility complex, class II, DP beta 1(HLA-DPB1)       | Homo sapiens |
| 307 | 11717311_turquoise | F-box protein 7(FBXO7)                                                | Homo sapiens |
| 308 | 11717317_turquoise | glycerol-3-phosphate acyltransferase 4(GPAT4)                         | Homo sapiens |
| 309 | 11717319_turquoise | SEC24 homolog D, COPII coat complex component(SEC24D)                 | Homo sapiens |
| 310 | 11717325_turquoise | nudix hydrolase 16 like 1(NUDT16L1)                                   | Homo sapiens |
| 311 | 11717337_turquoise | integrin subunit beta 2(ITGB2)                                        | Homo sapiens |
| 312 | 11717365_turquoise | syntrophin alpha 1(SNTA1)                                             | Homo sapiens |
| 313 | 11717366_turquoise | zinc finger CCCH-type containing, antiviral 1(ZC3HAV1)                | Homo sapiens |
| 314 | 11717367_turquoise | zinc finger CCCH-type containing, antiviral 1(ZC3HAV1)                | Homo sapiens |
| 315 | 11717368_turquoise | zinc finger CCCH-type containing, antiviral 1(ZC3HAV1)                | Homo sapiens |
| 316 | 11717371_turquoise | chromodomain helicase DNA binding protein 1 like(CHD1L)               | Homo sapiens |
| 317 | 11717375_turquoise | solute carrier family 25 member 25(SLC25A25)                          | Homo sapiens |
| 318 | 11717394_turquoise | ariadne RBR E3 ubiquitin protein ligase 2(ARIH2)                      | Homo sapiens |
| 319 | 11717397_turquoise | damage specific DNA binding protein 2(DDB2)                           | Homo sapiens |
| 320 | 11717401_turquoise | ADP ribosylation factor 6(ARF6)                                       | Homo sapiens |
| 321 | 11717402_turquoise | ADP ribosylation factor 6(ARF6)                                       | Homo sapiens |
| 322 | 11717407_brown     | ribonuclease P/MRP subunit p25 like(RPP25L)                           | Homo sapiens |
| 323 | 11717409_turquoise | SH2B adaptor protein 3(SH2B3)                                         | Homo sapiens |
| 324 | 11717418_turquoise | dynein axonemal light chain 1(DNAL1)                                  | Homo sapiens |
| 325 | 11717423_turquoise | RNA binding motif protein 8A(RBM8A)                                   | Homo sapiens |
| 326 | 11717425_turquoise | RNF103-CHMP3 readthrough(RNF103-CHMP3)                                | Homo sapiens |
| 327 | 11717427_turquoise | G protein subunit beta 1(GNB1)                                        | Homo sapiens |
| 328 | 11717429_brown     | peroxiredoxin 5(PRX5)                                                 | Homo sapiens |
| 329 | 11717430_blue      | cytochrome c oxidase subunit 7A1(COX7A1)                              | Homo sapiens |
| 330 | 11717438_turquoise | topoisomerase (DNA) I(TOP1)                                           | Homo sapiens |
| 331 | 11717447_turquoise | destrin, actin depolymerizing factor(DSTN)                            | Homo sapiens |
| 332 | 11717453_turquoise | SPARC/osteonectin, cwcv and kazal like domains proteoglycan 2(SPOCK2) | Homo sapiens |
| 333 | 11717454_turquoise | SPARC/osteonectin, cwcv and kazal like domains proteoglycan 2(SPOCK2) | Homo sapiens |
| 334 | 11717464_turquoise | latexin(LXN)                                                          | Homo sapiens |
| 335 | 11717465_turquoise | latexin(LXN)                                                          | Homo sapiens |
| 336 | 11717479_turquoise | lysosomal associated membrane protein 2(LAMP2)                        | Homo sapiens |
| 337 | 11717482_turquoise | pyruvate dehydrogenase (lipoamide) alpha 1(PDHA1)                     | Homo sapiens |
| 338 | 11717483_blue      | pyruvate dehydrogenase (lipoamide) alpha 1(PDHA1)                     | Homo sapiens |
| 339 | 11717484_blue      | pyruvate dehydrogenase (lipoamide) alpha 1(PDHA1)                     | Homo sapiens |
| 340 | 11717496_turquoise | inositol monophosphatase 2(IMPA2)                                     | Homo sapiens |
| 341 | 11717499_blue      | solute carrier family 25 member 36(SLC25A36)                          | Homo sapiens |
| 342 | 11717501_turquoise | hydroxyacylglutathione hydrolase(HAGH)                                | Homo sapiens |
| 343 | 11717502_turquoise | negative regulator of ubiquitin like proteins 1(NUB1)                 | Homo sapiens |
| 344 | 11717503_turquoise | negative regulator of ubiquitin like proteins 1(NUB1)                 | Homo sapiens |
| 345 | 11717507_turquoise | translocation associated membrane protein 2(TRAM2)                    | Homo sapiens |
| 346 | 11717508_turquoise | interferon regulatory factor 4(IRF4)                                  | Homo sapiens |
| 347 | 11717514_turquoise | annexin A1(ANXA1)                                                     | Homo sapiens |
| 348 | 11717517_turquoise | RNA exonuclease 2(REXO2)                                              | Homo sapiens |

|     |                    |                                                                  |              |
|-----|--------------------|------------------------------------------------------------------|--------------|
| 349 | 11717521_turquoise | pituitary tumor-transforming 3, pseudogene(PTTG3P)               | Homo sapiens |
| 350 | 11717528_turquoise | solute carrier family 25 member 20(SLC25A20)                     | Homo sapiens |
| 351 | 11717529_turquoise | solute carrier family 25 member 20(SLC25A20)                     | Homo sapiens |
| 352 | 11717533_turquoise | mannosidase alpha class 2A member 2(MAN2A2)                      | Homo sapiens |
| 353 | 11717542_turquoise | nuclear factor kappa B subunit 1(NFKB1)                          | Homo sapiens |
| 354 | 11717561_turquoise | deltex E3 ubiquitin ligase 3L(DTX3L)                             | Homo sapiens |
| 355 | 11717562_turquoise | deltex E3 ubiquitin ligase 3L(DTX3L)                             | Homo sapiens |
| 356 | 11717574_turquoise | profilin 1(PFN1)                                                 | Homo sapiens |
| 357 | 11717580_turquoise | CD52 molecule(CD52)                                              | Homo sapiens |
| 358 | 11717581_turquoise | CD52 molecule(CD52)                                              | Homo sapiens |
| 359 | 11717611_turquoise | microtubule associated serine/threonine kinase 2(MAST2)          | Homo sapiens |
| 360 | 11717634_brown     | cytochrome c oxidase subunit 6C(COX6C)                           | Homo sapiens |
| 361 | 11717636_turquoise | ras homolog family member G(RHOG)                                | Homo sapiens |
| 362 | 11717637_turquoise | ras homolog family member G(RHOG)                                | Homo sapiens |
| 363 | 11717643_brown     | mitochondrial ribosomal protein L24(MRPL24)                      | Homo sapiens |
| 364 | 11717654_brown     | C-X9-C motif containing 4(CMC4)                                  | Homo sapiens |
| 365 | 11717657_turquoise | enhancer of zeste 2 polycomb repressive complex 2 subunit(EZH2)  | Homo sapiens |
| 366 | 11717661_turquoise | protein phosphatase 1 regulatory subunit 16B(PPP1R16B)           | Homo sapiens |
| 367 | 11717662_turquoise | piezo type mechanosensitive ion channel component 1(PIEZO1)      | Homo sapiens |
| 368 | 11717670_brown     | NADH:ubiquinone oxidoreductase subunit B6(NDUFB6)                | Homo sapiens |
| 369 | 11717672_turquoise | ectonucleotide pyrophosphatase/phosphodiesterase 2(ENPP2)        | Homo sapiens |
| 370 | 11717679_turquoise | unc-13 homolog B(UNC13B)                                         | Homo sapiens |
| 371 | 11717681_turquoise | G protein subunit alpha 13(GNA13)                                | Homo sapiens |
| 372 | 11717688_turquoise | ring finger protein 19A, RBR E3 ubiquitin protein ligase(RNF19A) | Homo sapiens |
| 373 | 11717691_turquoise | ankyrin repeat domain 13A(ANKRD13A)                              | Homo sapiens |
| 374 | 11717708_turquoise | protein tyrosine phosphatase, non-receptor type 18(PTPN18)       | Homo sapiens |
| 375 | 11717714_turquoise | carbohydrate sulfotransferase 10(CHST10)                         | Homo sapiens |
| 376 | 11717721_turquoise | ST6 beta-galactoside alpha-2,6-sialyltransferase 1(ST6GAL1)      | Homo sapiens |
| 377 | 11717726_turquoise | hematological and neurological expressed 1(HN1)                  | Homo sapiens |
| 378 | 11717727_turquoise | hematological and neurological expressed 1(HN1)                  | Homo sapiens |
| 379 | 11717730_turquoise | squalene epoxidase(SQLE)                                         | Homo sapiens |
| 380 | 11717732_turquoise | 6-phosphofructo-2-kinase/fructose-2,6-biphosphatase 3(PFKFB3)    | Homo sapiens |
| 381 | 11717737_turquoise | prenylcysteine oxidase 1(PCYOX1)                                 | Homo sapiens |
| 382 | 11717738_turquoise | prenylcysteine oxidase 1(PCYOX1)                                 | Homo sapiens |
| 383 | 11717739_turquoise | prenylcysteine oxidase 1(PCYOX1)                                 | Homo sapiens |
| 384 | 11717743_turquoise | acyl-CoA thioesterase 7(ACOT7)                                   | Homo sapiens |
| 385 | 11717746_turquoise | membrane associated ring-CH-type finger 6(MARCH6)                | Homo sapiens |
| 386 | 11717760_turquoise | glia maturation factor gamma(GMFG)                               | Homo sapiens |
| 387 | 11717800_turquoise | activating transcription factor 5(ATF5)                          | Homo sapiens |
| 388 | 11717801_turquoise | activating transcription factor 5(ATF5)                          | Homo sapiens |
| 389 | 11717823_turquoise | TNF alpha induced protein 2(TNFAIP2)                             | Homo sapiens |
| 390 | 11717836_turquoise | allograft inflammatory factor 1(AIF1)                            | Homo sapiens |
| 391 | 11717837_turquoise | allograft inflammatory factor 1(AIF1)                            | Homo sapiens |
| 392 | 11717839_turquoise | programmed cell death 6(PDCD6)                                   | Homo sapiens |
| 393 | 11717840_turquoise | ethanolamine kinase 1(ETNK1)                                     | Homo sapiens |
| 394 | 11717841_turquoise | ethanolamine kinase 1(ETNK1)                                     | Homo sapiens |
| 395 | 11717858_turquoise | CD37 molecule(CD37)                                              | Homo sapiens |
| 396 | 11717859_brown     | emopamil binding protein (sterol isomerase)(EBP)                 | Homo sapiens |
| 397 | 11717865_turquoise | proteasome activator subunit 4(PSME4)                            | Homo sapiens |
| 398 | 11717872_turquoise | interferon regulatory factor 8(IRF8)                             | Homo sapiens |

|     |           |           |                                                                       |              |
|-----|-----------|-----------|-----------------------------------------------------------------------|--------------|
| 399 | 11717873_ | turquoise | interferon regulatory factor 8(IRF8)                                  | Homo sapiens |
| 400 | 11717874_ | turquoise | interferon regulatory factor 8(IRF8)                                  | Homo sapiens |
| 401 | 11717883_ | turquoise | zinc fingers and homeoboxes 3(ZHX3)                                   | Homo sapiens |
| 402 | 11717884_ | turquoise | zinc fingers and homeoboxes 3(ZHX3)                                   | Homo sapiens |
| 403 | 11717886_ | turquoise | plasminogen activator, urokinase(PLAU)                                | Homo sapiens |
| 404 | 11717887_ | turquoise | protein tyrosine phosphatase, non-receptor type 12(PTPN12)            | Homo sapiens |
| 405 | 11717889_ | turquoise | G protein subunit alpha i2(GNAI2)                                     | Homo sapiens |
| 406 | 11717931_ | turquoise | TANK binding kinase 1(TBK1)                                           | Homo sapiens |
| 407 | 11717936_ | blue      | endoplasmic reticulum metalloproteinase 1(ERMP1)                      | Homo sapiens |
| 408 | 11717939_ | turquoise | U2 small nuclear RNA auxiliary factor 2(U2AF2)                        | Homo sapiens |
| 409 | 11717959_ | turquoise | transcription factor 3(TCF3)                                          | Homo sapiens |
| 410 | 11717965_ | turquoise | KRAS proto-oncogene, GTPase(KRAS)                                     | Homo sapiens |
| 411 | 11717972_ | turquoise | family with sequence similarity 219 member B(FAM219B)                 | Homo sapiens |
| 412 | 11717973_ | turquoise | family with sequence similarity 219 member B(FAM219B)                 | Homo sapiens |
| 413 | 11717974_ | turquoise | family with sequence similarity 219 member B(FAM219B)                 | Homo sapiens |
| 414 | 11717981_ | turquoise | acid phosphatase 5, tartrate resistant(ACP5)                          | Homo sapiens |
| 415 | 11717988_ | turquoise | RNASEK-C17orf49 readthrough(RNASEK-C17orf49)                          | Homo sapiens |
| 416 | 11718001_ | turquoise | chromosome 10 open reading frame 54(C10orf54)                         | Homo sapiens |
| 417 | 11718002_ | turquoise | chromosome 10 open reading frame 54(C10orf54)                         | Homo sapiens |
| 418 | 11718005_ | turquoise | cell division cycle 25B(CDC25B)                                       | Homo sapiens |
| 419 | 11718008_ | turquoise | copine 2(CPNE2)                                                       | Homo sapiens |
| 420 | 11718010_ | turquoise | solute carrier family 25 member 22(SLC25A22)                          | Homo sapiens |
| 421 | 11718011_ | turquoise | mitochondrial ribosomal protein L4(MRPL4)                             | Homo sapiens |
| 422 | 11718020_ | turquoise | leucine rich repeat containing 20(LRRC20)                             | Homo sapiens |
| 423 | 11718026_ | turquoise | nuclear receptor coactivator 7(NCOA7)                                 | Homo sapiens |
| 424 | 11718027_ | turquoise | pseudouridylate synthase 1(PUS1)                                      | Homo sapiens |
| 425 | 11718028_ | turquoise | pseudouridylate synthase 1(PUS1)                                      | Homo sapiens |
| 426 | 11718035_ | blue      | peptidylprolyl isomerase like 1(PPIL1)                                | Homo sapiens |
| 427 | 11718036_ | brown     | peptidylprolyl isomerase like 1(PPIL1)                                | Homo sapiens |
| 428 | 11718037_ | turquoise | midkine (neurite growth-promoting factor 2)(MDK)                      | Homo sapiens |
| 429 | 11718050_ | turquoise | brain abundant membrane attached signal protein 1(BASP1)              | Homo sapiens |
| 430 | 11718058_ | turquoise | thymidylate synthetase(TYMS)                                          | Homo sapiens |
| 431 | 11718060_ | turquoise | tweety family member 2(TTYH2)                                         | Homo sapiens |
| 432 | 11718064_ | turquoise | S100 calcium binding protein A4(S100A4)                               | Homo sapiens |
| 433 | 11718065_ | turquoise | nectin cell adhesion molecule 2(NECTIN2)                              | Homo sapiens |
| 434 | 11718068_ | turquoise | myosin IE(MYO1E)                                                      | Homo sapiens |
| 435 | 11718073_ | turquoise | interleukin 4 receptor(IL4R)                                          | Homo sapiens |
| 436 | 11718075_ | turquoise | interleukin 4 receptor(IL4R)                                          | Homo sapiens |
| 437 | 11718076_ | brown     | mitogen-activated protein kinase-activated protein kinase 3(MAPKAPK3) | Homo sapiens |
| 438 | 11718084_ | turquoise | LYN proto-oncogene, Src family tyrosine kinase(LYN)                   | Homo sapiens |
| 439 | 11718085_ | turquoise | LYN proto-oncogene, Src family tyrosine kinase(LYN)                   | Homo sapiens |
| 440 | 11718086_ | turquoise | SH3KBP1 binding protein 1(SHKBP1)                                     | Homo sapiens |
| 441 | 11718099_ | turquoise | intraflagellar transport 20(IFT20)                                    | Homo sapiens |
| 442 | 11718117_ | blue      | NFS1, cysteine desulfurase(NFS1)                                      | Homo sapiens |
| 443 | 11718121_ | turquoise | ATPase H+ transporting V1 subunit A(ATP6V1A)                          | Homo sapiens |
| 444 | 11718134_ | turquoise | phosphoribosyl pyrophosphate synthetase 2(PRPS2)                      | Homo sapiens |
| 445 | 11718135_ | turquoise | phosphoribosyl pyrophosphate synthetase 2(PRPS2)                      | Homo sapiens |
| 446 | 11718140_ | turquoise | epithelial membrane protein 3(EMP3)                                   | Homo sapiens |
| 447 | 11718150_ | brown     | protease associated domain containing 1(PRADC1)                       | Homo sapiens |
| 448 | 11718152_ | turquoise | PPFIA binding protein 2(PPFIBP2)                                      | Homo sapiens |

|     |                    |                                                                             |              |
|-----|--------------------|-----------------------------------------------------------------------------|--------------|
| 449 | 11718158_turquoise | N-myc and STAT interactor(NMI)                                              | Homo sapiens |
| 450 | 11718159_turquoise | N-myc and STAT interactor(NMI)                                              | Homo sapiens |
| 451 | 11718184_turquoise | FCH and double SH3 domains 2(FCHSD2)                                        | Homo sapiens |
| 452 | 11718186_turquoise | ubiquitin like with PHD and ring finger domains 2(UHRF2)                    | Homo sapiens |
| 453 | 11718204_turquoise | REC8 meiotic recombination protein(REC8)                                    | Homo sapiens |
| 454 | 11718207_blue      | coenzyme Q6, monooxygenase(COQ6)                                            | Homo sapiens |
| 455 | 11718227_blue      | BCS1 homolog, ubiquinol-cytochrome c reductase complex chaperone(BCS1L)     | Homo sapiens |
| 456 | 11718230_turquoise | major histocompatibility complex, class I, F(HLA-F)                         | Homo sapiens |
| 457 | 11718231_turquoise | major histocompatibility complex, class I, F(HLA-F)                         | Homo sapiens |
| 458 | 11718239_blue      | cell cycle associated protein 1(CAPRIN1)                                    | Homo sapiens |
| 459 | 11718245_turquoise | solute carrier family 25 member 42(SLC25A42)                                | Homo sapiens |
| 460 | 11718265_turquoise | SMAD family member 3(SMAD3)                                                 | Homo sapiens |
| 461 | 11718266_turquoise | SMAD family member 3(SMAD3)                                                 | Homo sapiens |
| 462 | 11718276_brown     | interferon related developmental regulator 2(IFRD2)                         | Homo sapiens |
| 463 | 11718278_brown     | NADH:ubiquinone oxidoreductase subunit B4(NDUFB4)                           | Homo sapiens |
| 464 | 11718282_brown     | NADH:ubiquinone oxidoreductase core subunit V2(NDUFV2)                      | Homo sapiens |
| 465 | 11718290_turquoise | FXD domain containing ion transport regulator 5(FXD5)                       | Homo sapiens |
| 466 | 11718293_turquoise | cyclin dependent kinase inhibitor 2A(CDKN2A)                                | Homo sapiens |
| 467 | 11718297_turquoise | transforming acidic coiled-coil containing protein 3(TACC3)                 | Homo sapiens |
| 468 | 11718303_turquoise | platelet activating factor acetylhydrolase 1b catalytic subunit 3(PAFAH1B3) | Homo sapiens |
| 469 | 11718312_blue      | acyl-CoA dehydrogenase, short/branched chain(ACADSB)                        | Homo sapiens |
| 470 | 11718319_turquoise | CD93 molecule(CD93)                                                         | Homo sapiens |
| 471 | 11718322_turquoise | ArfGAP with coiled-coil, ankyrin repeat and PH domains 2(ACAP2)             | Homo sapiens |
| 472 | 11718325_turquoise | sestrin 2(SES2)                                                             | Homo sapiens |
| 473 | 11718340_turquoise | DAZ associated protein 2(DAZAP2)                                            | Homo sapiens |
| 474 | 11718370_turquoise | nuclear receptor binding factor 2(NRBF2)                                    | Homo sapiens |
| 475 | 11718381_turquoise | pleckstrin and Sec7 domain containing 4(PSD4)                               | Homo sapiens |
| 476 | 11718382_turquoise | poly(ADP-ribose) polymerase family member 4(PARP4)                          | Homo sapiens |
| 477 | 11718383_blue      | apoptosis inducing factor, mitochondria associated 1(AIFM1)                 | Homo sapiens |
| 478 | 11718400_turquoise | purine nucleoside phosphorylase(PNP)                                        | Homo sapiens |
| 479 | 11718415_turquoise | non-POU domain containing, octamer-binding(NONO)                            | Homo sapiens |
| 480 | 11718417_turquoise | ECSIT signalling integrator(ECSIT)                                          | Homo sapiens |
| 481 | 11718418_turquoise | thiosulfate sulfurtransferase(TST)                                          | Homo sapiens |
| 482 | 11718419_turquoise | Fc fragment of IgE receptor Ig(FCER1G)                                      | Homo sapiens |
| 483 | 11718420_turquoise | CLPTM1 like(CLPTM1L)                                                        | Homo sapiens |
| 484 | 11718425_turquoise | hydroxysteroid dehydrogenase like 2(HSDL2)                                  | Homo sapiens |
| 485 | 11718426_blue      | hydroxysteroid dehydrogenase like 2(HSDL2)                                  | Homo sapiens |
| 486 | 11718430_brown     | zinc finger protein 32(ZNF32)                                               | Homo sapiens |
| 487 | 11718436_turquoise | ATP synthase mitochondrial F1 complex assembly factor 2(ATPAF2)             | Homo sapiens |
| 488 | 11718450_turquoise | alpha-N-acetylgalactosaminidase(NAGA)                                       | Homo sapiens |
| 489 | 11718461_turquoise | solute carrier family 39 member 11(SLC39A11)                                | Homo sapiens |
| 490 | 11718468_turquoise | N-terminal EF-hand calcium binding protein 3(NECAB3)                        | Homo sapiens |
| 491 | 11718512_turquoise | tetraspanin 14(TSPAN14)                                                     | Homo sapiens |
| 492 | 11718513_turquoise | tetraspanin 14(TSPAN14)                                                     | Homo sapiens |
| 493 | 11718514_turquoise | tetraspanin 14(TSPAN14)                                                     | Homo sapiens |
| 494 | 11718515_turquoise | sulfide quinone reductase-like (yeast)(SQRDL)                               | Homo sapiens |
| 495 | 11718520_turquoise | potassium channel modulatory factor 1(KCMF1)                                | Homo sapiens |
| 496 | 11718525_turquoise | non imprinted in Prader-Willi/Angelman syndrome 2(NIPA2)                    | Homo sapiens |
| 497 | 11718528_turquoise | torsin family 3 member A(TOR3A)                                             | Homo sapiens |
| 498 | 11718534_turquoise | natural killer cell triggering receptor(NKTR)                               | Homo sapiens |

|     |                    |                                                                               |              |
|-----|--------------------|-------------------------------------------------------------------------------|--------------|
| 499 | 11718537_turquoise | fumarylacetoacetate hydrolase domain containing 2B(FAHD2B)                    | Homo sapiens |
| 500 | 11718538_turquoise | fumarylacetoacetate hydrolase domain containing 2A(FAHD2A)                    | Homo sapiens |
| 501 | 11718540_turquoise | transmembrane protein 243(TMEM243)                                            | Homo sapiens |
| 502 | 11718546_turquoise | interleukin enhancer binding factor 3(ILF3)                                   | Homo sapiens |
| 503 | 11718559_turquoise | nucleolar protein 4 like(NOL4L)                                               | Homo sapiens |
| 504 | 11718563_turquoise | ankyrin repeat domain 10(ANKRD10)                                             | Homo sapiens |
| 505 | 11718568_turquoise | WAS/WASL interacting protein family member 1(WIPF1)                           | Homo sapiens |
| 506 | 11718569_turquoise | WAS/WASL interacting protein family member 1(WIPF1)                           | Homo sapiens |
| 507 | 11718580_blue      | coenzyme Q9(COQ9)                                                             | Homo sapiens |
| 508 | 11718591_turquoise | stromal cell derived factor 2 like 1(SDF2L1)                                  | Homo sapiens |
| 509 | 11718592_turquoise | reticulon 4(RTN4)                                                             | Homo sapiens |
| 510 | 11718594_turquoise | cyclin L1(CCNL1)                                                              | Homo sapiens |
| 511 | 11718608_turquoise | microRNA 5193(MIR5193)                                                        | Homo sapiens |
| 512 | 11718610_turquoise | tumor protein p53 inducible nuclear protein 1(TP53INP1)                       | Homo sapiens |
| 513 | 11718621_turquoise | dual specificity phosphatase 12(DUSP12)                                       | Homo sapiens |
| 514 | 11718625_turquoise | deoxyguanosine kinase(DGUOK)                                                  | Homo sapiens |
| 515 | 11718631_turquoise | SERTA domain containing 1(SERTAD1)                                            | Homo sapiens |
| 516 | 11718641_turquoise | N-deacetylase and N-sulfotransferase 2(NDST2)                                 | Homo sapiens |
| 517 | 11718652_turquoise | signal transducer and activator of transcription 2(STAT2)                     | Homo sapiens |
| 518 | 11718655_turquoise | charged multivesicular body protein 5(CHMP5)                                  | Homo sapiens |
| 519 | 11718657_turquoise | microRNA 21(MIR21)                                                            | Homo sapiens |
| 520 | 11718659_turquoise | Mov10 RISC complex RNA helicase(MOV10)                                        | Homo sapiens |
| 521 | 11718665_turquoise | glutamyl-tRNA amidotransferase subunit C(GATC)                                | Homo sapiens |
| 522 | 11718666_turquoise | glutamyl-tRNA amidotransferase subunit C(GATC)                                | Homo sapiens |
| 523 | 11718669_blue      | mediator complex subunit 9(MED9)                                              | Homo sapiens |
| 524 | 11718670_turquoise | mediator complex subunit 9(MED9)                                              | Homo sapiens |
| 525 | 11718672_turquoise | interferon regulatory factor 3(IRF3)                                          | Homo sapiens |
| 526 | 11718674_turquoise | transmembrane protein 245(TMEM245)                                            | Homo sapiens |
| 527 | 11718678_turquoise | presenilin 1(PSEN1)                                                           | Homo sapiens |
| 528 | 11718680_turquoise | adhesion G protein-coupled receptor E5(ADGRE5)                                | Homo sapiens |
| 529 | 11718699_turquoise | chromosome 6 open reading frame 89(C6orf89)                                   | Homo sapiens |
| 530 | 11718757_turquoise | hypoxia inducible factor 1 alpha subunit(HIF1A)                               | Homo sapiens |
| 531 | 11718764_brown     | cytochrome c oxidase subunit 5B(COX5B)                                        | Homo sapiens |
| 532 | 11718765_brown     | NADH:ubiquinone oxidoreductase subunit A6(NDUFA6)                             | Homo sapiens |
| 533 | 11718766_turquoise | protease, serine 23(PRSS23)                                                   | Homo sapiens |
| 534 | 11718767_turquoise | protease, serine 23(PRSS23)                                                   | Homo sapiens |
| 535 | 11718788_turquoise | adenosine deaminase(ADA)                                                      | Homo sapiens |
| 536 | 11718807_turquoise | TNF receptor superfamily member 1B(TNFRSF1B)                                  | Homo sapiens |
| 537 | 11718809_turquoise | protein kinase C eta(PRKCH)                                                   | Homo sapiens |
| 538 | 11718810_turquoise | protein kinase C eta(PRKCH)                                                   | Homo sapiens |
| 539 | 11718811_turquoise | protein kinase C eta(PRKCH)                                                   | Homo sapiens |
| 540 | 11718830_turquoise | EH domain containing 1(EHD1)                                                  | Homo sapiens |
| 541 | 11718831_brown     | NADH:ubiquinone oxidoreductase subunit A2(NDUFA2)                             | Homo sapiens |
| 542 | 11718832_turquoise | lysyl oxidase like 2(LOXL2)                                                   | Homo sapiens |
| 543 | 11718837_blue      | NADH:ubiquinone oxidoreductase core subunit S2(NDUFS2)                        | Homo sapiens |
| 544 | 11718849_turquoise | protein tyrosine phosphatase, receptor type C associated protein(PTPRCAP)     | Homo sapiens |
| 545 | 11718854_blue      | mitochondrial ribosomal protein S30(MRPS30)                                   | Homo sapiens |
| 546 | 11718860_turquoise | Suv3 like RNA helicase(SUPV3L1)                                               | Homo sapiens |
| 547 | 11718861_turquoise | HCK proto-oncogene, Src family tyrosine kinase(HCK)                           | Homo sapiens |
| 548 | 11718865_turquoise | COX10, heme A:farnesyltransferase cytochrome c oxidase assembly factor(COX10) | Homo sapiens |

|     |                    |                                                                   |              |
|-----|--------------------|-------------------------------------------------------------------|--------------|
| 549 | 11718904_turquoise | filamin A interacting protein 1 like(FILIP1L)                     | Homo sapiens |
| 550 | 11718908_turquoise | carbohydrate sulfotransferase 2(CHST2)                            | Homo sapiens |
| 551 | 11718909_turquoise | carbohydrate sulfotransferase 2(CHST2)                            | Homo sapiens |
| 552 | 11718912_turquoise | PDZ domain containing 2(PDZD2)                                    | Homo sapiens |
| 553 | 11718914_turquoise | PDZ domain containing 2(PDZD2)                                    | Homo sapiens |
| 554 | 11718915_turquoise | regulator of G-protein signaling 19(RGS19)                        | Homo sapiens |
| 555 | 11718916_turquoise | interferon regulatory factor 7(IRF7)                              | Homo sapiens |
| 556 | 11718924_turquoise | WW domain containing E3 ubiquitin protein ligase 2(WWP2)          | Homo sapiens |
| 557 | 11718929_turquoise | TGFB induced factor homeobox 2(TGIF2)                             | Homo sapiens |
| 558 | 11718930_turquoise | TGFB induced factor homeobox 2(TGIF2)                             | Homo sapiens |
| 559 | 11718935_turquoise | serine/threonine kinase 19(STK19)                                 | Homo sapiens |
| 560 | 11718939_turquoise | TNF alpha induced protein 3(TNFAIP3)                              | Homo sapiens |
| 561 | 11718940_turquoise | TNF alpha induced protein 3(TNFAIP3)                              | Homo sapiens |
| 562 | 11718948_blue      | membrane palmitoylated protein 5(MPP5)                            | Homo sapiens |
| 563 | 11718950_turquoise | membrane palmitoylated protein 5(MPP5)                            | Homo sapiens |
| 564 | 11718954_turquoise | filamin binding LIM protein 1(FBLIM1)                             | Homo sapiens |
| 565 | 11718958_turquoise | protein kinase AMP-activated non-catalytic subunit beta 2(PRKAB2) | Homo sapiens |
| 566 | 11718981_turquoise | transgelin 2(TAGLN2)                                              | Homo sapiens |
| 567 | 11718982_turquoise | C-C motif chemokine ligand 4 like 1(CCL4L1)                       | Homo sapiens |
| 568 | 11718983_turquoise | C-C motif chemokine ligand 4 like 1(CCL4L1)                       | Homo sapiens |
| 569 | 11718986_turquoise | interferon alpha inducible protein 6(IFI6)                        | Homo sapiens |
| 570 | 11718991_brown     | NADH:ubiquinone oxidoreductase subunit B7(NDUFB7)                 | Homo sapiens |
| 571 | 11718996_turquoise | methionine sulfoxide reductase B2(MSRB2)                          | Homo sapiens |
| 572 | 11719016_turquoise | PQ loop repeat containing 3(PQLC3)                                | Homo sapiens |
| 573 | 11719020_turquoise | WD repeat and FYVE domain containing 1(WDFY1)                     | Homo sapiens |
| 574 | 11719021_turquoise | WD repeat and FYVE domain containing 1(WDFY1)                     | Homo sapiens |
| 575 | 11719029_turquoise | phosphoinositide-3-kinase adaptor protein 1(PIK3AP1)              | Homo sapiens |
| 576 | 11719038_turquoise | ArfGAP with RhoGAP domain, ankyrin repeat and PH domain 1(ARAP1)  | Homo sapiens |
| 577 | 11719046_turquoise | SNF related kinase(SNRK)                                          | Homo sapiens |
| 578 | 11719050_turquoise | butyrophilin subfamily 2 member A1(BTN2A1)                        | Homo sapiens |
| 579 | 11719065_blue      | glyceronephosphate O-acyltransferase(GNPAT)                       | Homo sapiens |
| 580 | 11719076_turquoise | receptor accessory protein 1(REEP1)                               | Homo sapiens |
| 581 | 11719083_turquoise | TruB pseudouridine synthase family member 2(TRUB2)                | Homo sapiens |
| 582 | 11719089_turquoise | phosphoenolpyruvate carboxykinase 2, mitochondrial(PCK2)          | Homo sapiens |
| 583 | 11719111_brown     | chromosome 11 open reading frame 1(C11orf1)                       | Homo sapiens |
| 584 | 11719115_blue      | glutamic-oxaloacetic transaminase 2(GOT2)                         | Homo sapiens |
| 585 | 11719116_blue      | glutamic-oxaloacetic transaminase 2(GOT2)                         | Homo sapiens |
| 586 | 11719117_blue      | glutamic-oxaloacetic transaminase 2(GOT2)                         | Homo sapiens |
| 587 | 11719120_turquoise | kynureninase(KYNU)                                                | Homo sapiens |
| 588 | 11719123_turquoise | timeless circadian clock(TIMELESS)                                | Homo sapiens |
| 589 | 11719126_turquoise | cell growth regulator with ring finger domain 1(CGRRF1)           | Homo sapiens |
| 590 | 11719128_turquoise | lipase maturation factor 2(LMF2)                                  | Homo sapiens |
| 591 | 11719132_turquoise | family with sequence similarity 49 member B(FAM49B)               | Homo sapiens |
| 592 | 11719154_turquoise | DNA damage regulated autophagy modulator 1(DRAM1)                 | Homo sapiens |
| 593 | 11719155_turquoise | DNA damage regulated autophagy modulator 1(DRAM1)                 | Homo sapiens |
| 594 | 11719164_turquoise | chloride voltage-gated channel 5(CLCN5)                           | Homo sapiens |
| 595 | 11719182_turquoise | chloride voltage-gated channel 7(CLCN7)                           | Homo sapiens |
| 596 | 11719188_turquoise | neuroblastoma RAS viral oncogene homolog(NRAS)                    | Homo sapiens |
| 597 | 11719189_turquoise | neuroblastoma RAS viral oncogene homolog(NRAS)                    | Homo sapiens |
| 598 | 11719193_turquoise | chibby family member 1, beta catenin antagonist(CBY1)             | Homo sapiens |

|     |                    |                                                                 |              |
|-----|--------------------|-----------------------------------------------------------------|--------------|
| 599 | 11719211_turquoise | heat shock transcription factor 2(HSF2)                         | Homo sapiens |
| 600 | 11719216_turquoise | tudor domain containing 7(TDRD7)                                | Homo sapiens |
| 601 | 11719218_turquoise | suppressor of cytokine signaling 3(SOCS3)                       | Homo sapiens |
| 602 | 11719224_blue      | coenzyme Q10A(COQ10A)                                           | Homo sapiens |
| 603 | 11719227_turquoise | potassium calcium-activated channel subfamily N member 4(KCNN4) | Homo sapiens |
| 604 | 11719232_grey      | protein tyrosine phosphatase, receptor type S(PTPRS)            | Homo sapiens |
| 605 | 11719245_turquoise | LARGE xylosyl- and glucuronyltransferase 1(LARGE1)              | Homo sapiens |
| 606 | 11719247_turquoise | absent in melanoma 1(AIM1)                                      | Homo sapiens |
| 607 | 11719248_turquoise | absent in melanoma 1(AIM1)                                      | Homo sapiens |
| 608 | 11719258_turquoise | toll like receptor adaptor molecule 1(TICAM1)                   | Homo sapiens |
| 609 | 11719270_turquoise | RNA binding motif protein 22(RBM22)                             | Homo sapiens |
| 610 | 11719271_turquoise | glucuronidase beta(GUSB)                                        | Homo sapiens |
| 611 | 11719304_brown     | ER membrane protein complex subunit 8(EMC8)                     | Homo sapiens |
| 612 | 11719305_turquoise | synaptopodin(SYNPO)                                             | Homo sapiens |
| 613 | 11719313_turquoise | family with sequence similarity 111 member A(FAM111A)           | Homo sapiens |
| 614 | 11719327_turquoise | cysteine rich with EGF like domains 2(CRELD2)                   | Homo sapiens |
| 615 | 11719332_turquoise | uncharacterized LOC101928361(LOC101928361)                      | Homo sapiens |
| 616 | 11719347_turquoise | Rho GTPase activating protein 19(ARHGAP19)                      | Homo sapiens |
| 617 | 11719354_turquoise | SH3 domain binding protein 5(SH3BP5)                            | Homo sapiens |
| 618 | 11719355_turquoise | SH3 domain binding protein 5(SH3BP5)                            | Homo sapiens |
| 619 | 11719359_blue      | aldehyde dehydrogenase 5 family member A1(ALDH5A1)              | Homo sapiens |
| 620 | 11719366_turquoise | C-X-C motif chemokine ligand 1(CXCL1)                           | Homo sapiens |
| 621 | 11719367_turquoise | pleckstrin homology domain containing O2(PLEKHO2)               | Homo sapiens |
| 622 | 11719372_turquoise | brain expressed X-linked 3(BEX3)                                | Homo sapiens |
| 623 | 11719377_turquoise | adenylate cyclase associated protein 1(CAP1)                    | Homo sapiens |
| 624 | 11719378_turquoise | Rap1 GTPase-GDP dissociation stimulator 1(RAP1GDS1)             | Homo sapiens |
| 625 | 11719379_turquoise | Rap1 GTPase-GDP dissociation stimulator 1(RAP1GDS1)             | Homo sapiens |
| 626 | 11719398_turquoise | Ras related GTP binding C(RRAGC)                                | Homo sapiens |
| 627 | 11719402_turquoise | RAP2A, member of RAS oncogene family(RAP2A)                     | Homo sapiens |
| 628 | 11719411_turquoise | RAB32, member RAS oncogene family(RAB32)                        | Homo sapiens |
| 629 | 11719413_turquoise | PBX homeobox 1(PBX1)                                            | Homo sapiens |
| 630 | 11719424_brown     | family with sequence similarity 220 member A(FAM220A)           | Homo sapiens |
| 631 | 11719425_blue      | family with sequence similarity 220 member A(FAM220A)           | Homo sapiens |
| 632 | 11719435_turquoise | LDL receptor related protein 4(LRP4)                            | Homo sapiens |
| 633 | 11719438_turquoise | SLIT-ROBO Rho GTPase activating protein 2(SRGAP2)               | Homo sapiens |
| 634 | 11719447_turquoise | guanylate binding protein 2(GBP2)                               | Homo sapiens |
| 635 | 11719465_turquoise | complement C1q B chain(C1QB)                                    | Homo sapiens |
| 636 | 11719466_turquoise | complement C1q B chain(C1QB)                                    | Homo sapiens |
| 637 | 11719479_turquoise | arachidonate 5-lipoxygenase activating protein(ALOX5AP)         | Homo sapiens |
| 638 | 11719480_turquoise | cystatin A(CSTA)                                                | Homo sapiens |
| 639 | 11719482_brown     | mitochondrial ribosomal protein L21(MRPL21)                     | Homo sapiens |
| 640 | 11719483_turquoise | purinergic receptor P2X 4(P2RX4)                                | Homo sapiens |
| 641 | 11719491_turquoise | interferon induced protein 35(IFI35)                            | Homo sapiens |
| 642 | 11719492_turquoise | interferon induced protein 35(IFI35)                            | Homo sapiens |
| 643 | 11719499_turquoise | monoamine oxidase B(MAOB)                                       | Homo sapiens |
| 644 | 11719501_turquoise | nuclear factor of activated T-cells 3(NFATC3)                   | Homo sapiens |
| 645 | 11719513_turquoise | ADAM metallopeptidase domain 15(ADAM15)                         | Homo sapiens |
| 646 | 11719528_turquoise | nectin cell adhesion molecule 2(NECTIN2)                        | Homo sapiens |
| 647 | 11719539_turquoise | nuclear envelope integral membrane protein 1(NEMP1)             | Homo sapiens |
| 648 | 11719543_turquoise | chromosome 3 open reading frame 18(C3orf18)                     | Homo sapiens |

|     |                    |                                                                                   |              |
|-----|--------------------|-----------------------------------------------------------------------------------|--------------|
| 649 | 11719554_turquoise | cathepsin S(CTSS)                                                                 | Homo sapiens |
| 650 | 11719556_turquoise | pyruvate dehydrogenase kinase 2(PDK2)                                             | Homo sapiens |
| 651 | 11719566_brown     | mitochondrial ribosomal protein S15(MRPS15)                                       | Homo sapiens |
| 652 | 11719579_turquoise | translational activator of cytochrome c oxidase I(TACO1)                          | Homo sapiens |
| 653 | 11719587_turquoise | MICAL like 1(MICALL1)                                                             | Homo sapiens |
| 654 | 11719588_turquoise | 2'-5'-oligoadenylate synthetase 1(OAS1)                                           | Homo sapiens |
| 655 | 11719591_turquoise | glycolipid transfer protein(GLTP)                                                 | Homo sapiens |
| 656 | 11719599_turquoise | homer scaffolding protein 2(HOMER2)                                               | Homo sapiens |
| 657 | 11719629_turquoise | bromodomain containing 2(BRD2)                                                    | Homo sapiens |
| 658 | 11719630_turquoise | bromodomain containing 2(BRD2)                                                    | Homo sapiens |
| 659 | 11719631_turquoise | bridging integrator 1(BIN1)                                                       | Homo sapiens |
| 660 | 11719644_turquoise | GATA zinc finger domain containing 2A(GATAD2A)                                    | Homo sapiens |
| 661 | 11719648_turquoise | caspase 7(CASP7)                                                                  | Homo sapiens |
| 662 | 11719657_turquoise | matrix metalloproteinase 9(MMP9)                                                  | Homo sapiens |
| 663 | 11719675_turquoise | vascular cell adhesion molecule 1(VCAM1)                                          | Homo sapiens |
| 664 | 11719676_turquoise | monoamine oxidase A(MAOA)                                                         | Homo sapiens |
| 665 | 11719680_turquoise | TNF receptor superfamily member 10b(TNFRSF10B)                                    | Homo sapiens |
| 666 | 11719686_turquoise | microtubule associated monooxygenase, calponin and LIM domain containing 1(MICAL) | Homo sapiens |
| 667 | 11719687_turquoise | SET domain bifurcated 1(SETDB1)                                                   | Homo sapiens |
| 668 | 11719692_turquoise | retinoic acid receptor responder 3(RARRES3)                                       | Homo sapiens |
| 669 | 11719718_turquoise | spleen associated tyrosine kinase(SYK)                                            | Homo sapiens |
| 670 | 11719728_turquoise | signal regulatory protein alpha(SIRPA)                                            | Homo sapiens |
| 671 | 11719738_turquoise | decapping mRNA 2(DCP2)                                                            | Homo sapiens |
| 672 | 11719739_turquoise | decapping mRNA 2(DCP2)                                                            | Homo sapiens |
| 673 | 11719745_turquoise | Rho GTPase activating protein 27(ARHGAP27)                                        | Homo sapiens |
| 674 | 11719749_turquoise | emopamil binding protein like(EBPL)                                               | Homo sapiens |
| 675 | 11719754_turquoise | interleukin 1 receptor antagonist(IL1RN)                                          | Homo sapiens |
| 676 | 11719763_turquoise | vacuolar protein sorting 13 homolog C(VPS13C)                                     | Homo sapiens |
| 677 | 11719780_turquoise | TNF alpha induced protein 8 like 2(TNFAIP8L2)                                     | Homo sapiens |
| 678 | 11719800_turquoise | chromosome 6 open reading frame 62(C6orf62)                                       | Homo sapiens |
| 679 | 11719801_turquoise | chromosome 6 open reading frame 62(C6orf62)                                       | Homo sapiens |
| 680 | 11719827_turquoise | glutaminyl-peptide cyclotransferase(QPCT)                                         | Homo sapiens |
| 681 | 11719828_turquoise | glutaminyl-peptide cyclotransferase(QPCT)                                         | Homo sapiens |
| 682 | 11719830_brown     | ERCC excision repair 1, endonuclease non-catalytic subunit(ERCC1)                 | Homo sapiens |
| 683 | 11719833_turquoise | myelin protein zero like 2(MPZL2)                                                 | Homo sapiens |
| 684 | 11719838_turquoise | caspase 3(CASP3)                                                                  | Homo sapiens |
| 685 | 11719844_turquoise | small ArfGAP2(SMAP2)                                                              | Homo sapiens |
| 686 | 11719845_turquoise | small ArfGAP2(SMAP2)                                                              | Homo sapiens |
| 687 | 11719861_turquoise | SLC2A4 regulator(SLC2A4RG)                                                        | Homo sapiens |
| 688 | 11719864_turquoise | small cell adhesion glycoprotein(SMAGP)                                           | Homo sapiens |
| 689 | 11719868_turquoise | v-myc avian myelocytomatosis viral oncogene neuroblastoma derived homolog(MYCN)   | Homo sapiens |
| 690 | 11719869_turquoise | v-myc avian myelocytomatosis viral oncogene neuroblastoma derived homolog(MYCN)   | Homo sapiens |
| 691 | 11719870_turquoise | v-myc avian myelocytomatosis viral oncogene neuroblastoma derived homolog(MYCN)   | Homo sapiens |
| 692 | 11719876_blue      | creatine kinase, mitochondrial 2(CKMT2)                                           | Homo sapiens |
| 693 | 11719877_brown     | tRNA phosphotransferase 1(TRPT1)                                                  | Homo sapiens |
| 694 | 11719886_turquoise | interferon induced protein 44(IFI44)                                              | Homo sapiens |
| 695 | 11719887_turquoise | GRB10 interacting GYF protein 2(GIGYF2)                                           | Homo sapiens |
| 696 | 11719892_turquoise | vasohibin 1(VASH1)                                                                | Homo sapiens |
| 697 | 11719894_turquoise | family with sequence similarity 91 member A1(FAM91A1)                             | Homo sapiens |
| 698 | 11719895_turquoise | family with sequence similarity 91 member A1(FAM91A1)                             | Homo sapiens |



|     |           |           |                                                                   |              |
|-----|-----------|-----------|-------------------------------------------------------------------|--------------|
| 699 | 11719897_ | turquoise | family with sequence similarity 91 member A1(FAM91A1)             | Homo sapiens |
| 700 | 11719902_ | turquoise | PHD finger protein 11(PHF11)                                      | Homo sapiens |
| 701 | 11719910_ | turquoise | phosphatidylinositol binding clathrin assembly protein(PICALM)    | Homo sapiens |
| 702 | 11719916_ | turquoise | interleukin 1 beta(IL1B)                                          | Homo sapiens |
| 703 | 11719938_ | turquoise | cullin associated and neddylation dissociated 1(CAND1)            | Homo sapiens |
| 704 | 11719939_ | turquoise | cullin associated and neddylation dissociated 1(CAND1)            | Homo sapiens |
| 705 | 11719943_ | turquoise | C-X-C motif chemokine ligand 9(CXCL9)                             | Homo sapiens |
| 706 | 11719953_ | turquoise | FK506 binding protein 15(FKBP15)                                  | Homo sapiens |
| 707 | 11719972_ | turquoise | SCO2, cytochrome c oxidase assembly protein(SCO2)                 | Homo sapiens |
| 708 | 11719973_ | turquoise | A-kinase anchoring protein 17A(AKAP17A)                           | Homo sapiens |
| 709 | 11719976_ | turquoise | WAS protein family member 3(WASF3)                                | Homo sapiens |
| 710 | 11719980_ | turquoise | formin like 2(FMNL2)                                              | Homo sapiens |
| 711 | 11719995_ | turquoise | transducin like enhancer of split 4(TLE4)                         | Homo sapiens |
| 712 | 11719996_ | turquoise | transducin like enhancer of split 4(TLE4)                         | Homo sapiens |
| 713 | 11720014_ | turquoise | ATM serine/threonine kinase(ATM)                                  | Homo sapiens |
| 714 | 11720029_ | turquoise | low density lipoprotein receptor(LDLR)                            | Homo sapiens |
| 715 | 11720034_ | turquoise | caspase 2(CASP2)                                                  | Homo sapiens |
| 716 | 11720035_ | turquoise | caspase 2(CASP2)                                                  | Homo sapiens |
| 717 | 11720043_ | turquoise | abhydrolase domain containing 16A(ABHD16A)                        | Homo sapiens |
| 718 | 11720044_ | turquoise | src kinase associated phosphoprotein 2(SKAP2)                     | Homo sapiens |
| 719 | 11720063_ | turquoise | GLI pathogenesis related 2(GLIPR2)                                | Homo sapiens |
| 720 | 11720064_ | turquoise | GLI pathogenesis related 2(GLIPR2)                                | Homo sapiens |
| 721 | 11720096_ | turquoise | LIM domain containing 2(LIMD2)                                    | Homo sapiens |
| 722 | 11720098_ | turquoise | centrosomal protein 70(CEP70)                                     | Homo sapiens |
| 723 | 11720103_ | turquoise | p21 (RAC1) activated kinase 1(PAK1)                               | Homo sapiens |
| 724 | 11720104_ | turquoise | p21 (RAC1) activated kinase 1(PAK1)                               | Homo sapiens |
| 725 | 11720107_ | turquoise | kinesin family member 2A(KIF2A)                                   | Homo sapiens |
| 726 | 11720111_ | turquoise | syntrophin beta 2(SNTB2)                                          | Homo sapiens |
| 727 | 11720112_ | turquoise | syntrophin beta 2(SNTB2)                                          | Homo sapiens |
| 728 | 11720113_ | turquoise | syntrophin beta 2(SNTB2)                                          | Homo sapiens |
| 729 | 11720114_ | brown     | ubiquitin conjugating enzyme E2 D4 (putative)(UBE2D4)             | Homo sapiens |
| 730 | 11720115_ | turquoise | serine/threonine protein kinase 26(STK26)                         | Homo sapiens |
| 731 | 11720117_ | turquoise | signal-induced proliferation-associated 1(SIPA1)                  | Homo sapiens |
| 732 | 11720140_ | brown     | Rab interacting lysosomal protein(RILP)                           | Homo sapiens |
| 733 | 11720143_ | turquoise | centriole, cilia and spindle associated protein(CCSAP)            | Homo sapiens |
| 734 | 11720146_ | turquoise | death associated protein kinase 1(DAPK1)                          | Homo sapiens |
| 735 | 11720153_ | turquoise | nuclear receptor interacting protein 1(NRIP1)                     | Homo sapiens |
| 736 | 11720161_ | turquoise | C-X-C motif chemokine ligand 13(CXCL13)                           | Homo sapiens |
| 737 | 11720163_ | turquoise | vascular endothelial growth factor C(VEGFC)                       | Homo sapiens |
| 738 | 11720167_ | turquoise | selectin L(SELL)                                                  | Homo sapiens |
| 739 | 11720168_ | turquoise | selectin L(SELL)                                                  | Homo sapiens |
| 740 | 11720171_ | brown     | mitochondrial ribosomal protein S16(MRPS16)                       | Homo sapiens |
| 741 | 11720187_ | turquoise | solute carrier family 27 member 3(SLC27A3)                        | Homo sapiens |
| 742 | 11720188_ | brown     | NADH:ubiquinone oxidoreductase subunit A7(NDUFA7)                 | Homo sapiens |
| 743 | 11720191_ | blue      | NADH:ubiquinone oxidoreductase complex assembly factor 4(NDUFAF4) | Homo sapiens |
| 744 | 11720192_ | brown     | NADH:ubiquinone oxidoreductase complex assembly factor 4(NDUFAF4) | Homo sapiens |
| 745 | 11720193_ | brown     | NADH:ubiquinone oxidoreductase complex assembly factor 4(NDUFAF4) | Homo sapiens |
| 746 | 11720197_ | turquoise | translocase of outer mitochondrial membrane 40 like(TOMM40L)      | Homo sapiens |
| 747 | 11720204_ | turquoise | 5'-nucleotidase domain containing 1(NT5DC1)                       | Homo sapiens |
| 748 | 11720206_ | turquoise | claudin 12(CLDN12)                                                | Homo sapiens |

|     |                    |                                                                           |              |
|-----|--------------------|---------------------------------------------------------------------------|--------------|
| 749 | 11720207_turquoise | interleukin 2 receptor subunit gamma(IL2RG)                               | Homo sapiens |
| 750 | 11720208_turquoise | interferon regulatory factor 9(IRF9)                                      | Homo sapiens |
| 751 | 11720209_turquoise | interferon regulatory factor 9(IRF9)                                      | Homo sapiens |
| 752 | 11720218_turquoise | mitogen-activated protein kinase kinase kinase 3(MAP3K3)                  | Homo sapiens |
| 753 | 11720219_turquoise | mitogen-activated protein kinase kinase kinase 3(MAP3K3)                  | Homo sapiens |
| 754 | 11720230_turquoise | testin LIM domain protein(TES)                                            | Homo sapiens |
| 755 | 11720231_turquoise | testin LIM domain protein(TES)                                            | Homo sapiens |
| 756 | 11720237_turquoise | mitogen-activated protein kinase 9(MAPK9)                                 | Homo sapiens |
| 757 | 11720238_blue      | mitogen-activated protein kinase 9(MAPK9)                                 | Homo sapiens |
| 758 | 11720243_turquoise | transcobalamin 2(TCN2)                                                    | Homo sapiens |
| 759 | 11720244_turquoise | phospholipase C gamma 2(PLCG2)                                            | Homo sapiens |
| 760 | 11720247_turquoise | centrosomal protein 55(CEP55)                                             | Homo sapiens |
| 761 | 11720254_turquoise | cyclin and CBS domain divalent metal cation transport mediator 4(CNNM4)   | Homo sapiens |
| 762 | 11720264_turquoise | activating signal cointegrator 1 complex subunit 3(ASCC3)                 | Homo sapiens |
| 763 | 11720280_turquoise | potassium calcium-activated channel subfamily M alpha 1(KCNMA1)           | Homo sapiens |
| 764 | 11720285_turquoise | trafficking kinesin protein 1(TRAK1)                                      | Homo sapiens |
| 765 | 11720298_turquoise | C-X-C motif chemokine ligand 10(CXCL10)                                   | Homo sapiens |
| 766 | 11720300_turquoise | Src-like-adaptor(SLA)                                                     | Homo sapiens |
| 767 | 11720301_turquoise | Src-like-adaptor(SLA)                                                     | Homo sapiens |
| 768 | 11720302_turquoise | Src-like-adaptor(SLA)                                                     | Homo sapiens |
| 769 | 11720306_turquoise | stress associated endoplasmic reticulum protein 1(SERP1)                  | Homo sapiens |
| 770 | 11720307_turquoise | stress associated endoplasmic reticulum protein 1(SERP1)                  | Homo sapiens |
| 771 | 11720308_turquoise | stress associated endoplasmic reticulum protein 1(SERP1)                  | Homo sapiens |
| 772 | 11720309_turquoise | stress associated endoplasmic reticulum protein 1(SERP1)                  | Homo sapiens |
| 773 | 11720320_turquoise | adenylate kinase 2(AK2)                                                   | Homo sapiens |
| 774 | 11720323_turquoise | adenylate kinase 2(AK2)                                                   | Homo sapiens |
| 775 | 11720328_brown     | ATP synthase, H+ transporting, mitochondrial F1 complex, O subunit(ATP5O) | Homo sapiens |
| 776 | 11720364_turquoise | GIMAP1-GIMAP5 readthrough(GIMAP1-GIMAP5)                                  | Homo sapiens |
| 777 | 11720367_turquoise | transmembrane protein 2(TMEM2)                                            | Homo sapiens |
| 778 | 11720373_turquoise | prune exopolyphosphatase(PRUNE1)                                          | Homo sapiens |
| 779 | 11720380_turquoise | inosine monophosphate dehydrogenase 1(IMPDH1)                             | Homo sapiens |
| 780 | 11720382_turquoise | syntaxin 6(STX6)                                                          | Homo sapiens |
| 781 | 11720384_turquoise | syntaxin 6(STX6)                                                          | Homo sapiens |
| 782 | 11720388_turquoise | complement C1q C chain(C1QC)                                              | Homo sapiens |
| 783 | 11720395_turquoise | nibrin(NBN)                                                               | Homo sapiens |
| 784 | 11720396_turquoise | nibrin(NBN)                                                               | Homo sapiens |
| 785 | 11720398_turquoise | nibrin(NBN)                                                               | Homo sapiens |
| 786 | 11720427_turquoise | ilvB acetolactate synthase like(ILVBL)                                    | Homo sapiens |
| 787 | 11720430_turquoise | ORMDL sphingolipid biosynthesis regulator 1(ORMDL1)                       | Homo sapiens |
| 788 | 11720441_turquoise | olfactomedin like 2B(OLFML2B)                                             | Homo sapiens |
| 789 | 11720443_turquoise | bromodomain adjacent to zinc finger domain 1A(BAZ1A)                      | Homo sapiens |
| 790 | 11720444_turquoise | ER lipid raft associated 1(ERLIN1)                                        | Homo sapiens |
| 791 | 11720459_turquoise | cell cycle associated protein 1(CAPRIN1)                                  | Homo sapiens |
| 792 | 11720460_turquoise | F11 receptor(F11R)                                                        | Homo sapiens |
| 793 | 11720464_turquoise | F11 receptor(F11R)                                                        | Homo sapiens |
| 794 | 11720487_brown     | heme binding protein 2(HEBP2)                                             | Homo sapiens |
| 795 | 11720493_turquoise | MOB kinase activator 3A(MOB3A)                                            | Homo sapiens |
| 796 | 11720496_turquoise | granzyme A(GZMA)                                                          | Homo sapiens |
| 797 | 11720501_turquoise | ubiquitination factor E4B(UBE4B)                                          | Homo sapiens |
| 798 | 11720502_turquoise | ubiquitination factor E4B(UBE4B)                                          | Homo sapiens |

|     |                    |                                                                                           |              |
|-----|--------------------|-------------------------------------------------------------------------------------------|--------------|
| 799 | 11720504_turquoise | RAB6B, member RAS oncogene family(RAB6B)                                                  | Homo sapiens |
| 800 | 11720510_turquoise | apolipoprotein B mRNA editing enzyme catalytic subunit 3G(APOBEC3G)                       | Homo sapiens |
| 801 | 11720511_turquoise | calcium regulated heat stable protein 1(CARHSP1)                                          | Homo sapiens |
| 802 | 11720535_brown     | methylmalonic aciduria (cobalamin deficiency) cb1B type(MMAB)                             | Homo sapiens |
| 803 | 11720537_turquoise | methylmalonic aciduria (cobalamin deficiency) cb1B type(MMAB)                             | Homo sapiens |
| 804 | 11720538_turquoise | feline leukemia virus subgroup C cellular receptor family member 2(FLVCR2)                | Homo sapiens |
| 805 | 11720551_turquoise | intermediate filament family orphan 1(IFFO1)                                              | Homo sapiens |
| 806 | 11720552_turquoise | intermediate filament family orphan 1(IFFO1)                                              | Homo sapiens |
| 807 | 11720554_turquoise | Rho/Rac guanine nucleotide exchange factor 18(ARHGEF18)                                   | Homo sapiens |
| 808 | 11720566_turquoise | branched chain amino acid transaminase 1(BCAT1)                                           | Homo sapiens |
| 809 | 11720570_turquoise | jade family PHD finger 2(JADE2)                                                           | Homo sapiens |
| 810 | 11720573_turquoise | ATPase phospholipid transporting 8B1(ATP8B1)                                              | Homo sapiens |
| 811 | 11720574_turquoise | ATPase phospholipid transporting 8B1(ATP8B1)                                              | Homo sapiens |
| 812 | 11720587_turquoise | structural maintenance of chromosomes flexible hinge domain containing 1(SMCHD1)          | Homo sapiens |
| 813 | 11720602_turquoise | synaptotagmin 11(SYT11)                                                                   | Homo sapiens |
| 814 | 11720609_turquoise | prohibitin(PHB)                                                                           | Homo sapiens |
| 815 | 11720610_brown     | prohibitin(PHB)                                                                           | Homo sapiens |
| 816 | 11720621_turquoise | ATP citrate lyase(ACLY)                                                                   | Homo sapiens |
| 817 | 11720623_turquoise | myeloid differentiation primary response 88(MYD88)                                        | Homo sapiens |
| 818 | 11720624_turquoise | myeloid differentiation primary response 88(MYD88)                                        | Homo sapiens |
| 819 | 11720630_brown     | small nuclear ribonucleoprotein U11/U12 subunit 25(SNRNP25)                               | Homo sapiens |
| 820 | 11720631_brown     | succinate dehydrogenase complex iron sulfur subunit B(SDHB)                               | Homo sapiens |
| 821 | 11720632_brown     | succinate dehydrogenase complex iron sulfur subunit B(SDHB)                               | Homo sapiens |
| 822 | 11720635_brown     | ATP synthase, H <sup>+</sup> transporting, mitochondrial F1 complex, delta subunit(ATP5D) | Homo sapiens |
| 823 | 11720644_turquoise | platelet and endothelial cell adhesion molecule 1(PECAM1)                                 | Homo sapiens |
| 824 | 11720646_turquoise | serine palmitoyltransferase long chain base subunit 2(SPTLC2)                             | Homo sapiens |
| 825 | 11720657_turquoise | major histocompatibility complex, class II, DR beta 5(HLA-DRB5)                           | Homo sapiens |
| 826 | 11720672_turquoise | protein phosphatase, Mg <sup>2+</sup> /Mn <sup>2+</sup> dependent 1A(PPM1A)               | Homo sapiens |
| 827 | 11720673_blue      | protein phosphatase, Mg <sup>2+</sup> /Mn <sup>2+</sup> dependent 1A(PPM1A)               | Homo sapiens |
| 828 | 11720674_blue      | protein phosphatase, Mg <sup>2+</sup> /Mn <sup>2+</sup> dependent 1A(PPM1A)               | Homo sapiens |
| 829 | 11720679_turquoise | CKLF-CMTM1 readthrough(CKLF-CMTM1)                                                        | Homo sapiens |
| 830 | 11720680_turquoise | diacylglycerol kinase alpha(DGKA)                                                         | Homo sapiens |
| 831 | 11720694_turquoise | HEN1 methyltransferase homolog 1(HENMT1)                                                  | Homo sapiens |
| 832 | 11720695_turquoise | chromosome 1 open reading frame 54(C1orf54)                                               | Homo sapiens |
| 833 | 11720725_turquoise | zyg-11 family member B, cell cycle regulator(ZYG11B)                                      | Homo sapiens |
| 834 | 11720747_turquoise | adenylate cyclase 7(ADCY7)                                                                | Homo sapiens |
| 835 | 11720751_turquoise | inositol polyphosphate-1-phosphatase(INPP1)                                               | Homo sapiens |
| 836 | 11720754_turquoise | actin beta(ACTB)                                                                          | Homo sapiens |
| 837 | 11720755_turquoise | signal transducer and activator of transcription 3(STAT3)                                 | Homo sapiens |
| 838 | 11720756_turquoise | signal transducer and activator of transcription 3(STAT3)                                 | Homo sapiens |
| 839 | 11720763_turquoise | selectin P ligand(SELPLG)                                                                 | Homo sapiens |
| 840 | 11720769_turquoise | peptidylprolyl isomerase F(PPIF)                                                          | Homo sapiens |
| 841 | 11720770_blue      | peptidylprolyl isomerase F(PPIF)                                                          | Homo sapiens |
| 842 | 11720771_blue      | peptidylprolyl isomerase F(PPIF)                                                          | Homo sapiens |
| 843 | 11720773_brown     | DnaJ heat shock protein family (Hsp40) member C19(DNAJC19)                                | Homo sapiens |
| 844 | 11720774_brown     | DnaJ heat shock protein family (Hsp40) member C19(DNAJC19)                                | Homo sapiens |
| 845 | 11720787_blue      | dynein cytoplasmic 1 light intermediate chain 1(DYNC1LI1)                                 | Homo sapiens |
| 846 | 11720793_turquoise | acetoacetyl-CoA synthetase(AACS)                                                          | Homo sapiens |
| 847 | 11720798_turquoise | RAB8B, member RAS oncogene family(RAB8B)                                                  | Homo sapiens |
| 848 | 11720799_turquoise | RAB8B, member RAS oncogene family(RAB8B)                                                  | Homo sapiens |

|     |                    |                                                                |              |
|-----|--------------------|----------------------------------------------------------------|--------------|
| 849 | 11720800_turquoise | RAB8B, member RAS oncogene family(RAB8B)                       | Homo sapiens |
| 850 | 11720802_turquoise | bridging integrator 3(BIN3)                                    | Homo sapiens |
| 851 | 11720809_brown     | phosphoglycerate dehydrogenase(PHGDH)                          | Homo sapiens |
| 852 | 11720821_brown     | FUN14 domain containing 2(FUNDC2)                              | Homo sapiens |
| 853 | 11720827_turquoise | centromere protein W(CENPW)                                    | Homo sapiens |
| 854 | 11720832_turquoise | SRY-box 18(SOX18)                                              | Homo sapiens |
| 855 | 11720842_turquoise | ras homolog family member D(RHOD)                              | Homo sapiens |
| 856 | 11720847_turquoise | PHD finger protein 6(PHF6)                                     | Homo sapiens |
| 857 | 11720859_turquoise | abhydrolase domain containing 3(ABHD3)                         | Homo sapiens |
| 858 | 11720860_turquoise | Rho guanine nucleotide exchange factor 3(ARHGEF3)              | Homo sapiens |
| 859 | 11720861_turquoise | Rho guanine nucleotide exchange factor 3(ARHGEF3)              | Homo sapiens |
| 860 | 11720863_brown     | patatin like phospholipase domain containing 4(PNPLA4)         | Homo sapiens |
| 861 | 11720867_turquoise | placenta specific 8(PLAC8)                                     | Homo sapiens |
| 862 | 11720884_brown     | hydroxymethylbilane synthase(HMBS)                             | Homo sapiens |
| 863 | 11720891_turquoise | ubiquitin specific peptidase 20(USP20)                         | Homo sapiens |
| 864 | 11720893_turquoise | SOS Ras/Rac guanine nucleotide exchange factor 1(SOS1)         | Homo sapiens |
| 865 | 11720907_turquoise | semaphorin 3F(SEMA3F)                                          | Homo sapiens |
| 866 | 11720909_turquoise | transmembrane protein 44(TMEM44)                               | Homo sapiens |
| 867 | 11720910_turquoise | neural EGFL like 2(NELL2)                                      | Homo sapiens |
| 868 | 11720922_turquoise | HLA complex P5 (non-protein coding)(HCP5)                      | Homo sapiens |
| 869 | 11720923_turquoise | HLA complex P5 (non-protein coding)(HCP5)                      | Homo sapiens |
| 870 | 11720943_turquoise | regulator of G-protein signaling 16(RGS16)                     | Homo sapiens |
| 871 | 11720944_turquoise | regulator of G-protein signaling 16(RGS16)                     | Homo sapiens |
| 872 | 11720963_turquoise | deoxycytidine kinase(DCK)                                      | Homo sapiens |
| 873 | 11720964_turquoise | deoxycytidine kinase(DCK)                                      | Homo sapiens |
| 874 | 11720965_turquoise | deoxycytidine kinase(DCK)                                      | Homo sapiens |
| 875 | 11720966_turquoise | deoxycytidine kinase(DCK)                                      | Homo sapiens |
| 876 | 11720970_turquoise | topoisomerase (DNA) II alpha(TOP2A)                            | Homo sapiens |
| 877 | 11720971_turquoise | topoisomerase (DNA) II alpha(TOP2A)                            | Homo sapiens |
| 878 | 11720972_turquoise | topoisomerase (DNA) II alpha(TOP2A)                            | Homo sapiens |
| 879 | 11720973_turquoise | ankyrin repeat and SOCS box containing 8(ASB8)                 | Homo sapiens |
| 880 | 11720974_brown     | ankyrin repeat and SOCS box containing 8(ASB8)                 | Homo sapiens |
| 881 | 11720977_turquoise | tryptophanyl tRNA synthetase 2, mitochondrial(WARS2)           | Homo sapiens |
| 882 | 11720982_turquoise | protein tyrosine kinase 2 beta(PTK2B)                          | Homo sapiens |
| 883 | 11720989_turquoise | solute carrier family 7 member 7(SLC7A7)                       | Homo sapiens |
| 884 | 11720994_turquoise | C-C motif chemokine ligand 3(CCL3)                             | Homo sapiens |
| 885 | 11720998_turquoise | bridging integrator 2(BIN2)                                    | Homo sapiens |
| 886 | 11720999_turquoise | bridging integrator 2(BIN2)                                    | Homo sapiens |
| 887 | 11721027_turquoise | cyclin G associated kinase(GAK)                                | Homo sapiens |
| 888 | 11721028_blue      | malonyl-CoA decarboxylase(MLYCD)                               | Homo sapiens |
| 889 | 11721029_blue      | phosphatidylinositol-4-phosphate 5-kinase type 1 beta(PIP5K1B) | Homo sapiens |
| 890 | 11721030_blue      | phosphatidylinositol-4-phosphate 5-kinase type 1 beta(PIP5K1B) | Homo sapiens |
| 891 | 11721043_turquoise | exoribonuclease 1(ERI1)                                        | Homo sapiens |
| 892 | 11721044_turquoise | exoribonuclease 1(ERI1)                                        | Homo sapiens |
| 893 | 11721053_turquoise | kelch like family member 42(KLHL42)                            | Homo sapiens |
| 894 | 11721054_turquoise | kelch like family member 42(KLHL42)                            | Homo sapiens |
| 895 | 11721055_turquoise | protein kinase, X-linked(PRKX)                                 | Homo sapiens |
| 896 | 11721056_turquoise | protein kinase, X-linked(PRKX)                                 | Homo sapiens |
| 897 | 11721061_turquoise | IQ motif containing GTPase activating protein 2(IQGAP2)        | Homo sapiens |
| 898 | 11721077_brown     | esterase D(ESD)                                                | Homo sapiens |

|     |           |           |                                                                             |              |
|-----|-----------|-----------|-----------------------------------------------------------------------------|--------------|
| 899 | 11721096_ | turquoise | thioredoxin related transmembrane protein 1(TMX1)                           | Homo sapiens |
| 900 | 11721097_ | turquoise | thioredoxin related transmembrane protein 1(TMX1)                           | Homo sapiens |
| 901 | 11721098_ | turquoise | thioredoxin related transmembrane protein 1(TMX1)                           | Homo sapiens |
| 902 | 11721099_ | turquoise | complement C3a receptor 1(C3AR1)                                            | Homo sapiens |
| 903 | 11721111_ | brown     | acyl-CoA thioesterase 13(ACOT13)                                            | Homo sapiens |
| 904 | 11721120_ | turquoise | nudix hydrolase 5(NUDT5)                                                    | Homo sapiens |
| 905 | 11721125_ | turquoise | signal peptide peptidase like 2A(SPPL2A)                                    | Homo sapiens |
| 906 | 11721140_ | turquoise | transcription elongation factor A3(TCEA3)                                   | Homo sapiens |
| 907 | 11721141_ | turquoise | transcription elongation factor A3(TCEA3)                                   | Homo sapiens |
| 908 | 11721143_ | turquoise | marker of proliferation Ki-67(MKI67)                                        | Homo sapiens |
| 909 | 11721145_ | turquoise | marker of proliferation Ki-67(MKI67)                                        | Homo sapiens |
| 910 | 11721147_ | turquoise | synaptogyrin 1(SYNGR1)                                                      | Homo sapiens |
| 911 | 11721149_ | turquoise | LysM domain containing 2(LYSMD2)                                            | Homo sapiens |
| 912 | 11721157_ | turquoise | nth like DNA glycosylase 1(NTHL1)                                           | Homo sapiens |
| 913 | 11721163_ | turquoise | KH and NYN domain containing(KHNYN)                                         | Homo sapiens |
| 914 | 11721169_ | turquoise | PYD and CARD domain containing(PYCARD)                                      | Homo sapiens |
| 915 | 11721184_ | turquoise | tetraspanin 33(TSPAN33)                                                     | Homo sapiens |
| 916 | 11721202_ | turquoise | ribonuclease A family member k6(RNASE6)                                     | Homo sapiens |
| 917 | 11721208_ | turquoise | intermediate filament family orphan 2(IFFO2)                                | Homo sapiens |
| 918 | 11721223_ | turquoise | acyl-CoA oxidase 2(ACOX2)                                                   | Homo sapiens |
| 919 | 11721243_ | turquoise | leucine aminopeptidase 3(LAP3)                                              | Homo sapiens |
| 920 | 11721248_ | turquoise | G protein subunit gamma 2(GNG2)                                             | Homo sapiens |
| 921 | 11721265_ | brown     | glutamyl-tRNA amidotransferase subunit B(GATB)                              | Homo sapiens |
| 922 | 11721272_ | turquoise | leucine rich repeat containing 59(LRRC59)                                   | Homo sapiens |
| 923 | 11721296_ | brown     | NADH:ubiquinone oxidoreductase subunit B1(NDUFB1)                           | Homo sapiens |
| 924 | 11721297_ | turquoise | ABRA C-terminal like(ABRACL)                                                | Homo sapiens |
| 925 | 11721302_ | turquoise | C-type lectin domain family 2 member B(CLEC2B)                              | Homo sapiens |
| 926 | 11721303_ | turquoise | C-type lectin domain family 2 member B(CLEC2B)                              | Homo sapiens |
| 927 | 11721313_ | turquoise | extended synaptotagmin 2(ESYT2)                                             | Homo sapiens |
| 928 | 11721346_ | turquoise | macrophage expressed 1(MPEG1)                                               | Homo sapiens |
| 929 | 11721347_ | turquoise | macrophage expressed 1(MPEG1)                                               | Homo sapiens |
| 930 | 11721349_ | turquoise | ubiquitin specific peptidase 18(USP18)                                      | Homo sapiens |
| 931 | 11721366_ | turquoise | tripartite motif containing 47(TRIM47)                                      | Homo sapiens |
| 932 | 11721380_ | turquoise | N-acetylglucosamine-1-phosphate transferase alpha and beta subunits(GNPTAB) | Homo sapiens |
| 933 | 11721390_ | turquoise | HtrA serine peptidase 3(HTRA3)                                              | Homo sapiens |
| 934 | 11721408_ | turquoise | polyamine oxidase(PAOX)                                                     | Homo sapiens |
| 935 | 11721432_ | turquoise | microtubule associated protein 1S(MAP1S)                                    | Homo sapiens |
| 936 | 11721454_ | turquoise | serpin family A member 1(SERPINA1)                                          | Homo sapiens |
| 937 | 11721455_ | turquoise | serpin family A member 1(SERPINA1)                                          | Homo sapiens |
| 938 | 11721456_ | turquoise | serpin family A member 1(SERPINA1)                                          | Homo sapiens |
| 939 | 11721460_ | turquoise | TAP binding protein like(TAPBPL)                                            | Homo sapiens |
| 940 | 11721461_ | brown     | COP9 signalosome subunit 5(COP5)                                            | Homo sapiens |
| 941 | 11721472_ | blue      | holocytochrome c synthase(HCCS)                                             | Homo sapiens |
| 942 | 11721473_ | brown     | holocytochrome c synthase(HCCS)                                             | Homo sapiens |
| 943 | 11721491_ | turquoise | fructose-bisphosphatase 1(FBP1)                                             | Homo sapiens |
| 944 | 11721493_ | turquoise | sulfatase 2(SULF2)                                                          | Homo sapiens |
| 945 | 11721504_ | turquoise | CKLF-CMTM1 readthrough(CKLF-CMTM1)                                          | Homo sapiens |
| 946 | 11721512_ | turquoise | translocase of inner mitochondrial membrane 21(TIMM21)                      | Homo sapiens |
| 947 | 11721554_ | turquoise | collagen beta(1-O)galactosyltransferase 1(COLGALT1)                         | Homo sapiens |
| 948 | 11721557_ | turquoise | ATP binding cassette subfamily A member 8(ABCA8)                            | Homo sapiens |

|     |                    |                                                           |              |
|-----|--------------------|-----------------------------------------------------------|--------------|
| 949 | 11721570_turquoise | family with sequence similarity 173 member B(FAM173B)     | Homo sapiens |
| 950 | 11721573_turquoise | activin A receptor like type 1(ACVRL1)                    | Homo sapiens |
| 951 | 11721574_turquoise | E74 like ETS transcription factor 4(ELF4)                 | Homo sapiens |
| 952 | 11721577_turquoise | tumor necrosis factor(TNF)                                | Homo sapiens |
| 953 | 11721582_turquoise | lymphoid restricted membrane protein(LRMP)                | Homo sapiens |
| 954 | 11721583_turquoise | lymphoid restricted membrane protein(LRMP)                | Homo sapiens |
| 955 | 11721587_turquoise | TNF receptor associated factor 1(TRAF1)                   | Homo sapiens |
| 956 | 11721588_turquoise | TNF receptor associated factor 1(TRAF1)                   | Homo sapiens |
| 957 | 11721590_turquoise | solute carrier family 17 member 9(SLC17A9)                | Homo sapiens |
| 958 | 11721609_turquoise | poly(A) binding protein cytoplasmic 1 like(PABPC1L)       | Homo sapiens |
| 959 | 11721615_turquoise | thymocyte selection associated family member 2(THEMIS2)   | Homo sapiens |
| 960 | 11721623_turquoise | mesenchyme homeobox 1(MEOX1)                              | Homo sapiens |
| 961 | 11721626_turquoise | septin 6(SEPT6)                                           | Homo sapiens |
| 962 | 11721627_turquoise | septin 6(SEPT6)                                           | Homo sapiens |
| 963 | 11721628_turquoise | septin 6(SEPT6)                                           | Homo sapiens |
| 964 | 11721629_turquoise | MAF bZIP transcription factor B(MAFB)                     | Homo sapiens |
| 965 | 11721630_turquoise | MAF bZIP transcription factor B(MAFB)                     | Homo sapiens |
| 966 | 11721651_turquoise | cadherin 5(CDH5)                                          | Homo sapiens |
| 967 | 11721661_turquoise | thromboxane A synthase 1(TBXAS1)                          | Homo sapiens |
| 968 | 11721673_brown     | glutaredoxin 5(GLRX5)                                     | Homo sapiens |
| 969 | 11721674_brown     | glutaredoxin 5(GLRX5)                                     | Homo sapiens |
| 970 | 11721675_brown     | glutaredoxin 5(GLRX5)                                     | Homo sapiens |
| 971 | 11721683_brown     | mitochondrial ribosomal protein S9(MRPS9)                 | Homo sapiens |
| 972 | 11721685_turquoise | C-C motif chemokine ligand 19(CCL19)                      | Homo sapiens |
| 973 | 11721695_turquoise | dual specificity phosphatase 2(DUSP2)                     | Homo sapiens |
| 974 | 11721702_turquoise | CKLF like MARVEL transmembrane domain containing 7(CMTM7) | Homo sapiens |
| 975 | 11721704_turquoise | cysteine rich protein 1(CRIP1)                            | Homo sapiens |
| 976 | 11721706_grey      | glycerol-3-phosphate acyltransferase, mitochondrial(GPAM) | Homo sapiens |
| 977 | 11721719_turquoise | N-acylethanolamine acid amidase(NAAA)                     | Homo sapiens |
| 978 | 11721722_turquoise | MSH5-SAPCD1 readthrough (NMD candidate)(MSH5-SAPCD1)      | Homo sapiens |
| 979 | 11721728_turquoise | Rho GTPase activating protein 30(ARHGAP30)                | Homo sapiens |
| 980 | 11721733_turquoise | GTP cyclohydrolase 1(GCH1)                                | Homo sapiens |
| 981 | 11721734_turquoise | GTP cyclohydrolase 1(GCH1)                                | Homo sapiens |
| 982 | 11721755_turquoise | ALG13, UDP-N-acetylglucosaminyltransferase subunit(ALG13) | Homo sapiens |
| 983 | 11721760_turquoise | tRNA splicing endonuclease subunit 54(TSEN54)             | Homo sapiens |
| 984 | 11721762_turquoise | phosphoinositide-3-kinase regulatory subunit 5(PIK3R5)    | Homo sapiens |
| 985 | 11721773_turquoise | WSC domain containing 1(WSCD1)                            | Homo sapiens |
| 986 | 11721780_turquoise | LLGL2, scribble cell polarity complex component(LLGL2)    | Homo sapiens |
| 987 | 11721804_turquoise | BUB3, mitotic checkpoint protein(BUB3)                    | Homo sapiens |
| 988 | 11721810_turquoise | Pim-2 proto-oncogene, serine/threonine kinase(PIM2)       | Homo sapiens |
| 989 | 11721815_turquoise | Fc fragment of IgM receptor(FCMR)                         | Homo sapiens |
| 990 | 11721816_turquoise | Fc fragment of IgM receptor(FCMR)                         | Homo sapiens |
| 991 | 11721827_turquoise | zwilch kinetochore protein(ZWILCH)                        | Homo sapiens |
| 992 | 11721828_turquoise | zwilch kinetochore protein(ZWILCH)                        | Homo sapiens |
| 993 | 11721836_brown     | transmembrane protein 14B(TMEM14B)                        | Homo sapiens |
| 994 | 11721838_turquoise | GLI pathogenesis related 1(GLIPR1)                        | Homo sapiens |
| 995 | 11721839_turquoise | GLI pathogenesis related 1(GLIPR1)                        | Homo sapiens |
| 996 | 11721840_turquoise | GLI pathogenesis related 1(GLIPR1)                        | Homo sapiens |
| 997 | 11721841_turquoise | GLI pathogenesis related 1(GLIPR1)                        | Homo sapiens |
| 998 | 11721842_turquoise | GLI pathogenesis related 1(GLIPR1)                        | Homo sapiens |

|      |                    |                                                                    |              |
|------|--------------------|--------------------------------------------------------------------|--------------|
| 999  | 11721843_turquoise | atlastin GTPase 3(ATL3)                                            | Homo sapiens |
| 1000 | 11721851_brown     | coiled-coil-helix-coiled-coil-helix domain containing 6(CHCHD6)    | Homo sapiens |
| 1001 | 11721859_turquoise | mitochondrial intermediate peptidase(MIPEP)                        | Homo sapiens |
| 1002 | 11721860_turquoise | syntaxin 12(STX12)                                                 | Homo sapiens |
| 1003 | 11721861_turquoise | syntaxin 12(STX12)                                                 | Homo sapiens |
| 1004 | 11721872_turquoise | family with sequence similarity 110 member A(FAM110A)              | Homo sapiens |
| 1005 | 11721873_turquoise | interferon induced protein with tetratricopeptide repeats 2(IFIT2) | Homo sapiens |
| 1006 | 11721874_turquoise | interferon induced protein with tetratricopeptide repeats 2(IFIT2) | Homo sapiens |
| 1007 | 11721879_turquoise | AT-rich interaction domain 4B(ARID4B)                              | Homo sapiens |
| 1008 | 11721880_turquoise | AT-rich interaction domain 4B(ARID4B)                              | Homo sapiens |
| 1009 | 11721885_turquoise | cell division cycle 42(CDC42)                                      | Homo sapiens |
| 1010 | 11721897_turquoise | DExH-box helicase 58(DHX58)                                        | Homo sapiens |
| 1011 | 11721900_turquoise | ficolin 1(FCN1)                                                    | Homo sapiens |
| 1012 | 11721906_turquoise | proteasome subunit alpha 4(PSMA4)                                  | Homo sapiens |
| 1013 | 11721907_turquoise | sphingosine-1-phosphate phosphatase 1(SGPP1)                       | Homo sapiens |
| 1014 | 11721922_turquoise | protein kinase C beta(PRKCB)                                       | Homo sapiens |
| 1015 | 11721923_turquoise | protein kinase C beta(PRKCB)                                       | Homo sapiens |
| 1016 | 11721924_turquoise | protein kinase C beta(PRKCB)                                       | Homo sapiens |
| 1017 | 11721927_turquoise | transmembrane channel like 8(TMC8)                                 | Homo sapiens |
| 1018 | 11721935_turquoise | DnaJ heat shock protein family (Hsp40) member C27(DNAJC27)         | Homo sapiens |
| 1019 | 11721954_turquoise | ring finger protein 41(RNF41)                                      | Homo sapiens |
| 1020 | 11721960_turquoise | sorting nexin family member 30(SNX30)                              | Homo sapiens |
| 1021 | 11721974_turquoise | sulfite oxidase(SUOX)                                              | Homo sapiens |
| 1022 | 11721988_turquoise | coiled-coil domain containing 191(CCDC191)                         | Homo sapiens |
| 1023 | 11721994_turquoise | ubiquitin conjugating enzyme E2 L6(UBE2L6)                         | Homo sapiens |
| 1024 | 11721996_turquoise | poly(ADP-ribose) polymerase family member 14(PARP14)               | Homo sapiens |
| 1025 | 11721997_turquoise | poly(ADP-ribose) polymerase family member 14(PARP14)               | Homo sapiens |
| 1026 | 11721998_turquoise | poly(ADP-ribose) polymerase family member 14(PARP14)               | Homo sapiens |
| 1027 | 11722003_turquoise | cytochrome c, somatic(CYCS)                                        | Homo sapiens |
| 1028 | 11722004_blue      | cytochrome c, somatic(CYCS)                                        | Homo sapiens |
| 1029 | 11722005_turquoise | nuclear autoantigenic sperm protein(NASP)                          | Homo sapiens |
| 1030 | 11722009_turquoise | chloride intracellular channel 1(CLIC1)                            | Homo sapiens |
| 1031 | 11722011_turquoise | GTPase, IMAP family member 4(GIMAP4)                               | Homo sapiens |
| 1032 | 11722012_turquoise | GTPase, IMAP family member 4(GIMAP4)                               | Homo sapiens |
| 1033 | 11722028_blue      | ubiquitin conjugating enzyme E2 G1(UBE2G1)                         | Homo sapiens |
| 1034 | 11722038_turquoise | FES proto-oncogene, tyrosine kinase(FES)                           | Homo sapiens |
| 1035 | 11722039_turquoise | FES proto-oncogene, tyrosine kinase(FES)                           | Homo sapiens |
| 1036 | 11722040_brown     | eukaryotic translation initiation factor 2B subunit gamma(EIF2B3)  | Homo sapiens |
| 1037 | 11722049_turquoise | dual specificity phosphatase 6(DUSP6)                              | Homo sapiens |
| 1038 | 11722072_turquoise | mesoderm development candidate 1(MESDC1)                           | Homo sapiens |
| 1039 | 11722086_turquoise | septin 1(SEPT1)                                                    | Homo sapiens |
| 1040 | 11722089_turquoise | echinoderm microtubule associated protein like 3(EML3)             | Homo sapiens |
| 1041 | 11722095_turquoise | kinesin family member 21B(KIF21B)                                  | Homo sapiens |
| 1042 | 11722120_turquoise | kinetochore associated 1(KNTC1)                                    | Homo sapiens |
| 1043 | 11722130_turquoise | enoyl-CoA hydratase domain containing 2(ECHDC2)                    | Homo sapiens |
| 1044 | 11722134_turquoise | TNF receptor superfamily member 25(TNFRSF25)                       | Homo sapiens |
| 1045 | 11722141_turquoise | RELB proto-oncogene, NF-kB subunit(RELB)                           | Homo sapiens |
| 1046 | 11722143_turquoise | tetratricopeptide repeat and ankyrin repeat containing 1(TRANK1)   | Homo sapiens |
| 1047 | 11722147_turquoise | poly(A) binding protein interacting protein 2B(PAIP2B)             | Homo sapiens |
| 1048 | 11722152_turquoise | eukaryotic translation initiation factor 2 alpha kinase 3(EIF2AK3) | Homo sapiens |

|      |                    |                                                                                        |              |
|------|--------------------|----------------------------------------------------------------------------------------|--------------|
| 1049 | 11722170_turquoise | coronin 7(CORO7)                                                                       | Homo sapiens |
| 1050 | 11722173_blue      | ubiquinol-cytochrome c reductase complex assembly factor 1(UQCC1)                      | Homo sapiens |
| 1051 | 11722174_turquoise | ubiquinol-cytochrome c reductase complex assembly factor 1(UQCC1)                      | Homo sapiens |
| 1052 | 11722183_turquoise | ATPase H+ transporting V1 subunit C1(ATP6V1C1)                                         | Homo sapiens |
| 1053 | 11722193_turquoise | chromosome 12 open reading frame 75(C12orf75)                                          | Homo sapiens |
| 1054 | 11722194_brown     | microRNA 4691(MIR4691)                                                                 | Homo sapiens |
| 1055 | 11722225_turquoise | ADAM metallopeptidase domain 8(ADAM8)                                                  | Homo sapiens |
| 1056 | 11722226_brown     | succinate dehydrogenase complex assembly factor 3(SDHAF3)                              | Homo sapiens |
| 1057 | 11722228_turquoise | DnaJ heat shock protein family (Hsp40) member C30(DNAJC30)                             | Homo sapiens |
| 1058 | 11722247_turquoise | Ras association domain family member 1(RASSF1)                                         | Homo sapiens |
| 1059 | 11722248_turquoise | Ras association domain family member 1(RASSF1)                                         | Homo sapiens |
| 1060 | 11722262_turquoise | ER degradation enhancing alpha-mannosidase like protein 1(EDEM1)                       | Homo sapiens |
| 1061 | 11722269_turquoise | SAM and SH3 domain containing 3(SASH3)                                                 | Homo sapiens |
| 1062 | 11722270_turquoise | SAM and SH3 domain containing 3(SASH3)                                                 | Homo sapiens |
| 1063 | 11722286_turquoise | solute carrier family 30 member 7(SLC30A7)                                             | Homo sapiens |
| 1064 | 11722287_turquoise | solute carrier family 30 member 7(SLC30A7)                                             | Homo sapiens |
| 1065 | 11722298_turquoise | RAB29, member RAS oncogene family(RAB29)                                               | Homo sapiens |
| 1066 | 11722299_turquoise | RAB29, member RAS oncogene family(RAB29)                                               | Homo sapiens |
| 1067 | 11722300_turquoise | ETS proto-oncogene 1, transcription factor(ETS1)                                       | Homo sapiens |
| 1068 | 11722302_turquoise | LRR binding FLII interacting protein 1(LRRFIP1)                                        | Homo sapiens |
| 1069 | 11722303_turquoise | LRR binding FLII interacting protein 1(LRRFIP1)                                        | Homo sapiens |
| 1070 | 11722304_turquoise | LRR binding FLII interacting protein 1(LRRFIP1)                                        | Homo sapiens |
| 1071 | 11722313_turquoise | Rap guanine nucleotide exchange factor 6(RAPGEF6)                                      | Homo sapiens |
| 1072 | 11722314_turquoise | Rap guanine nucleotide exchange factor 6(RAPGEF6)                                      | Homo sapiens |
| 1073 | 11722321_turquoise | hematopoietically expressed homeobox(HHEX)                                             | Homo sapiens |
| 1074 | 11722333_turquoise | fibronectin type III domain containing 5(FNDC5)                                        | Homo sapiens |
| 1075 | 11722334_turquoise | fibronectin type III domain containing 5(FNDC5)                                        | Homo sapiens |
| 1076 | 11722335_turquoise | fibronectin type III domain containing 5(FNDC5)                                        | Homo sapiens |
| 1077 | 11722338_brown     | peroxisomal biogenesis factor 7(PEX7)                                                  | Homo sapiens |
| 1078 | 11722349_turquoise | Lck interacting transmembrane adaptor 1(LIME1)                                         | Homo sapiens |
| 1079 | 11722355_turquoise | DAB2, clathrin adaptor protein(DAB2)                                                   | Homo sapiens |
| 1080 | 11722356_turquoise | DAB2, clathrin adaptor protein(DAB2)                                                   | Homo sapiens |
| 1081 | 11722364_blue      | cytochrome c oxidase subunit 6A2(COX6A2)                                               | Homo sapiens |
| 1082 | 11722368_turquoise | tripartite motif containing 22(TRIM22)                                                 | Homo sapiens |
| 1083 | 11722369_turquoise | tripartite motif containing 22(TRIM22)                                                 | Homo sapiens |
| 1084 | 11722370_turquoise | tripartite motif containing 22(TRIM22)                                                 | Homo sapiens |
| 1085 | 11722371_turquoise | tripartite motif containing 22(TRIM22)                                                 | Homo sapiens |
| 1086 | 11722403_turquoise | pleckstrin homology domain containing O1(PLEKHO1)                                      | Homo sapiens |
| 1087 | 11722417_turquoise | La ribonucleoprotein domain family member 6(LARP6)                                     | Homo sapiens |
| 1088 | 11722418_turquoise | UTP3, small subunit processome component homolog (S. cerevisiae)(UTP3)                 | Homo sapiens |
| 1089 | 11722419_turquoise | UTP3, small subunit processome component homolog (S. cerevisiae)(UTP3)                 | Homo sapiens |
| 1090 | 11722425_turquoise | neural precursor cell expressed, developmentally down-regulated 4-like, E3 ubiquitin p | Homo sapiens |
| 1091 | 11722426_turquoise | fibrinogen like 2(FGL2)                                                                | Homo sapiens |
| 1092 | 11722427_turquoise | fibrinogen like 2(FGL2)                                                                | Homo sapiens |
| 1093 | 11722446_turquoise | sirtuin 3(SIRT3)                                                                       | Homo sapiens |
| 1094 | 11722447_turquoise | sirtuin 3(SIRT3)                                                                       | Homo sapiens |
| 1095 | 11722449_turquoise | thymidine phosphorylase(TYMP)                                                          | Homo sapiens |
| 1096 | 11722458_turquoise | transmembrane protein 206(TMEM206)                                                     | Homo sapiens |
| 1097 | 11722462_turquoise | tankyrase 2(TNKS2)                                                                     | Homo sapiens |
| 1098 | 11722471_turquoise | paternally expressed 3(PEG3)                                                           | Homo sapiens |



|      |                    |                                                                       |              |
|------|--------------------|-----------------------------------------------------------------------|--------------|
| 1099 | 11722472_turquoise | paternally expressed 3(PEG3)                                          | Homo sapiens |
| 1100 | 11722474_turquoise | diacylglycerol kinase theta(DGKQ)                                     | Homo sapiens |
| 1101 | 11722480_turquoise | FGR proto-oncogene, Src family tyrosine kinase(FGR)                   | Homo sapiens |
| 1102 | 11722481_turquoise | mitochondrial fission factor(MFF)                                     | Homo sapiens |
| 1103 | 11722482_blue      | mitochondrial fission factor(MFF)                                     | Homo sapiens |
| 1104 | 11722501_turquoise | p21 (RAC1) activated kinase 6(PAK6)                                   | Homo sapiens |
| 1105 | 11722502_turquoise | p21 (RAC1) activated kinase 6(PAK6)                                   | Homo sapiens |
| 1106 | 11722512_turquoise | SP110 nuclear body protein(SP110)                                     | Homo sapiens |
| 1107 | 11722535_turquoise | cyclin Y like 1(CCNYL1)                                               | Homo sapiens |
| 1108 | 11722538_turquoise | transmembrane and coiled-coil domains 6(TMCO6)                        | Homo sapiens |
| 1109 | 11722555_blue      | hydroxyacyl-CoA dehydrogenase(HADH)                                   | Homo sapiens |
| 1110 | 11722571_turquoise | cyclin A2(CCNA2)                                                      | Homo sapiens |
| 1111 | 11722573_turquoise | endoplasmic reticulum aminopeptidase 2(ERAP2)                         | Homo sapiens |
| 1112 | 11722574_turquoise | adaptor related protein complex 1 gamma 1 subunit(AP1G1)              | Homo sapiens |
| 1113 | 11722577_turquoise | prolyl 3-hydroxylase 1(P3H1)                                          | Homo sapiens |
| 1114 | 11722609_turquoise | CDC42 small effector 1(CDC42SE1)                                      | Homo sapiens |
| 1115 | 11722620_turquoise | aquaporin 4(AQP4)                                                     | Homo sapiens |
| 1116 | 11722635_turquoise | interleukin 2 receptor subunit beta(IL2RB)                            | Homo sapiens |
| 1117 | 11722660_turquoise | nuclear factor, erythroid 2 like 3(NFE2L3)                            | Homo sapiens |
| 1118 | 11722679_turquoise | poly(ADP-ribose) polymerase family member 8(PARP8)                    | Homo sapiens |
| 1119 | 11722680_turquoise | hematopoietic cell signal transducer(HCST)                            | Homo sapiens |
| 1120 | 11722697_turquoise | SFI1 centrin binding protein(SFI1)                                    | Homo sapiens |
| 1121 | 11722705_turquoise | UDP-GlcNAc:betaGal beta-1,3-N-acetylglucosaminyltransferase 5(B3GNT5) | Homo sapiens |
| 1122 | 11722708_turquoise | coiled-coil serine rich protein 2(CCSE2)                              | Homo sapiens |
| 1123 | 11722721_turquoise | centromere protein V(CENPV)                                           | Homo sapiens |
| 1124 | 11722725_turquoise | colony stimulating factor 2 receptor beta common subunit(CSF2RB)      | Homo sapiens |
| 1125 | 11722728_turquoise | early growth response 2(EGR2)                                         | Homo sapiens |
| 1126 | 11722747_turquoise | hook microtubule tethering protein 3(HOOK3)                           | Homo sapiens |
| 1127 | 11722765_turquoise | GIT ArfGAP 2(GIT2)                                                    | Homo sapiens |
| 1128 | 11722768_turquoise | Rap guanine nucleotide exchange factor 5(RAPGEF5)                     | Homo sapiens |
| 1129 | 11722778_turquoise | ectonucleotide pyrophosphatase/phosphodiesterase 2(ENPP2)             | Homo sapiens |
| 1130 | 11722794_turquoise | glycerophosphodiester phosphodiesterase 1(GDE1)                       | Homo sapiens |
| 1131 | 11722795_blue      | glycerophosphodiester phosphodiesterase 1(GDE1)                       | Homo sapiens |
| 1132 | 11722806_turquoise | RAB35, member RAS oncogene family(RAB35)                              | Homo sapiens |
| 1133 | 11722807_turquoise | WD repeat domain 54(WDR54)                                            | Homo sapiens |
| 1134 | 11722818_turquoise | gamma-glutamyl hydrolase(GGH)                                         | Homo sapiens |
| 1135 | 11722826_turquoise | non-SMC condensin I complex subunit G(NCAPG)                          | Homo sapiens |
| 1136 | 11722841_blue      | transcription factor B2, mitochondrial(TFB2M)                         | Homo sapiens |
| 1137 | 11722850_turquoise | baculoviral IAP repeat containing 3(BIRC3)                            | Homo sapiens |
| 1138 | 11722851_turquoise | baculoviral IAP repeat containing 3(BIRC3)                            | Homo sapiens |
| 1139 | 11722852_turquoise | baculoviral IAP repeat containing 3(BIRC3)                            | Homo sapiens |
| 1140 | 11722874_turquoise | male-specific lethal 3 homolog (Drosophila)(MSL3)                     | Homo sapiens |
| 1141 | 11722880_turquoise | PHD finger protein 19(PHF19)                                          | Homo sapiens |
| 1142 | 11722886_turquoise | embigin(EMB)                                                          | Homo sapiens |
| 1143 | 11722887_turquoise | embigin(EMB)                                                          | Homo sapiens |
| 1144 | 11722888_turquoise | embigin(EMB)                                                          | Homo sapiens |
| 1145 | 11722904_turquoise | TBC1 domain family member 9(TBC1D9)                                   | Homo sapiens |
| 1146 | 11722911_blue      | ubiquitin specific peptidase 13 (isopeptidase T-3)(USP13)             | Homo sapiens |
| 1147 | 11722912_blue      | ubiquitin specific peptidase 13 (isopeptidase T-3)(USP13)             | Homo sapiens |
| 1148 | 11722913_blue      | ubiquitin specific peptidase 13 (isopeptidase T-3)(USP13)             | Homo sapiens |

|      |           |           |                                                                                      |              |
|------|-----------|-----------|--------------------------------------------------------------------------------------|--------------|
| 1149 | 11722923_ | turquoise | family with sequence similarity 122B(FAM122B)                                        | Homo sapiens |
| 1150 | 11722928_ | turquoise | microRNA 4656(MIR4656)                                                               | Homo sapiens |
| 1151 | 11722940_ | turquoise | SLIT-ROBO Rho GTPase activating protein 2(SRGAP2)                                    | Homo sapiens |
| 1152 | 11722960_ | turquoise | cytochrome b561 family member D1(CYB561D1)                                           | Homo sapiens |
| 1153 | 11722964_ | turquoise | Alport syndrome, mental retardation, midface hypoplasia and elliptocytosis chromoson | Homo sapiens |
| 1154 | 11722979_ | turquoise | coagulation factor VIII(F8)                                                          | Homo sapiens |
| 1155 | 11722982_ | turquoise | lysosomal trafficking regulator(LYST)                                                | Homo sapiens |
| 1156 | 11723006_ | turquoise | S100 calcium binding protein A4(S100A4)                                              | Homo sapiens |
| 1157 | 11723010_ | turquoise | kinesin family member 20A(KIF20A)                                                    | Homo sapiens |
| 1158 | 11723016_ | turquoise | histocompatibility minor 13(HM13)                                                    | Homo sapiens |
| 1159 | 11723020_ | turquoise | receptor interacting serine/threonine kinase 3(RIPK3)                                | Homo sapiens |
| 1160 | 11723021_ | turquoise | branched chain keto acid dehydrogenase E1 subunit beta(BCKDHB)                       | Homo sapiens |
| 1161 | 11723025_ | turquoise | family with sequence similarity 26 member F(FAM26F)                                  | Homo sapiens |
| 1162 | 11723026_ | turquoise | family with sequence similarity 26 member F(FAM26F)                                  | Homo sapiens |
| 1163 | 11723046_ | brown     | mitochondrial assembly of ribosomal large subunit 1(MALSU1)                          | Homo sapiens |
| 1164 | 11723048_ | turquoise | C-X3-C motif chemokine receptor 1(CX3CR1)                                            | Homo sapiens |
| 1165 | 11723050_ | turquoise | heat shock protein family A (Hsp70) member 6(HSPA6)                                  | Homo sapiens |
| 1166 | 11723056_ | brown     | mitochondrial ribosomal protein L33(MRPL33)                                          | Homo sapiens |
| 1167 | 11723057_ | brown     | mitochondrial ribosomal protein L33(MRPL33)                                          | Homo sapiens |
| 1168 | 11723058_ | turquoise | transporter 2, ATP binding cassette subfamily B member(TAP2)                         | Homo sapiens |
| 1169 | 11723059_ | turquoise | transporter 2, ATP binding cassette subfamily B member(TAP2)                         | Homo sapiens |
| 1170 | 11723060_ | turquoise | Rab interacting lysosomal protein like 2(RILPL2)                                     | Homo sapiens |
| 1171 | 11723061_ | turquoise | Rab interacting lysosomal protein like 2(RILPL2)                                     | Homo sapiens |
| 1172 | 11723065_ | turquoise | endonuclease G(ENDOG)                                                                | Homo sapiens |
| 1173 | 11723069_ | turquoise | ubiquitin D(UBD)                                                                     | Homo sapiens |
| 1174 | 11723080_ | brown     | matrix AAA peptidase interacting protein 1(MAIP1)                                    | Homo sapiens |
| 1175 | 11723095_ | turquoise | CYLD lysine 63 deubiquitinase(CYLD)                                                  | Homo sapiens |
| 1176 | 11723096_ | turquoise | CYLD lysine 63 deubiquitinase(CYLD)                                                  | Homo sapiens |
| 1177 | 11723099_ | turquoise | carbonic anhydrase 14(CA14)                                                          | Homo sapiens |
| 1178 | 11723100_ | turquoise | carbonic anhydrase 14(CA14)                                                          | Homo sapiens |
| 1179 | 11723105_ | turquoise | cytidine/uridine monophosphate kinase 2(CMPK2)                                       | Homo sapiens |
| 1180 | 11723106_ | turquoise | neutrophil cytosolic factor 4(NCF4)                                                  | Homo sapiens |
| 1181 | 11723110_ | turquoise | pleckstrin homology domain containing B2(PLEKHB2)                                    | Homo sapiens |
| 1182 | 11723116_ | turquoise | RAD51L3-RFFL readthrough(RAD51L3-RFFL)                                               | Homo sapiens |
| 1183 | 11723134_ | turquoise | solute carrier family 22 member 17(SLC22A17)                                         | Homo sapiens |
| 1184 | 11723144_ | turquoise | sodium leak channel, non-selective(NALCN)                                            | Homo sapiens |
| 1185 | 11723151_ | turquoise | succinyl-CoA:glutarate-CoA transferase(SUGCT)                                        | Homo sapiens |
| 1186 | 11723156_ | turquoise | lymphocyte-specific protein 1(LSP1)                                                  | Homo sapiens |
| 1187 | 11723159_ | turquoise | transmembrane protein 229B(TMEM229B)                                                 | Homo sapiens |
| 1188 | 11723169_ | turquoise | forkhead box N2(FOXN2)                                                               | Homo sapiens |
| 1189 | 11723179_ | turquoise | intersectin 2(ITSN2)                                                                 | Homo sapiens |
| 1190 | 11723181_ | turquoise | mitogen-activated protein kinase 4(MAPK4)                                            | Homo sapiens |
| 1191 | 11723182_ | turquoise | CCR4-NOT transcription complex subunit 6 like(CNOT6L)                                | Homo sapiens |
| 1192 | 11723183_ | turquoise | CCR4-NOT transcription complex subunit 6 like(CNOT6L)                                | Homo sapiens |
| 1193 | 11723184_ | turquoise | CCR4-NOT transcription complex subunit 6 like(CNOT6L)                                | Homo sapiens |
| 1194 | 11723185_ | turquoise | CCR4-NOT transcription complex subunit 6 like(CNOT6L)                                | Homo sapiens |
| 1195 | 11723194_ | turquoise | major histocompatibility complex, class II, DQ beta 1(HLA-DQB1)                      | Homo sapiens |
| 1196 | 11723195_ | turquoise | major histocompatibility complex, class I, E(HLA-E)                                  | Homo sapiens |
| 1197 | 11723197_ | turquoise | heterogeneous nuclear ribonucleoprotein A3(HNRNPA3)                                  | Homo sapiens |
| 1198 | 11723198_ | turquoise | heterogeneous nuclear ribonucleoprotein A3 pseudogene 1(HNRNPA3P1)                   | Homo sapiens |

|      |           |           |                                                                    |              |
|------|-----------|-----------|--------------------------------------------------------------------|--------------|
| 1199 | 11723199_ | turquoise | heterogeneous nuclear ribonucleoprotein A3 pseudogene 1(HNRNPA3P1) | Homo sapiens |
| 1200 | 11723217_ | turquoise | sideroflexin 3(SFXN3)                                              | Homo sapiens |
| 1201 | 11723230_ | turquoise | ring finger protein 138(RNF138)                                    | Homo sapiens |
| 1202 | 11723231_ | turquoise | ring finger protein 138 pseudogene 1(RNF138P1)                     | Homo sapiens |
| 1203 | 11723232_ | turquoise | ring finger protein 138(RNF138)                                    | Homo sapiens |
| 1204 | 11723243_ | turquoise | cyclin dependent kinase 6(CDK6)                                    | Homo sapiens |
| 1205 | 11723262_ | turquoise | antagonist of mitotic exit network 1 homolog(AMN1)                 | Homo sapiens |
| 1206 | 11723263_ | blue      | antagonist of mitotic exit network 1 homolog(AMN1)                 | Homo sapiens |
| 1207 | 11723264_ | turquoise | CD3d molecule(CD3D)                                                | Homo sapiens |
| 1208 | 11723287_ | turquoise | TYRO protein tyrosine kinase binding protein(TYROBP)               | Homo sapiens |
| 1209 | 11723292_ | turquoise | ORAI calcium release-activated calcium modulator 1(ORAI1)          | Homo sapiens |
| 1210 | 11723310_ | turquoise | TNF receptor superfamily member 10d(TNFRSF10D)                     | Homo sapiens |
| 1211 | 11723313_ | brown     | peroxisomal membrane protein 2(PXMP2)                              | Homo sapiens |
| 1212 | 11723335_ | turquoise | GEM interacting protein(GMIP)                                      | Homo sapiens |
| 1213 | 11723346_ | turquoise | LYL1, basic helix-loop-helix family member(LYL1)                   | Homo sapiens |
| 1214 | 11723372_ | turquoise | dedicator of cytokinesis 11(DOCK11)                                | Homo sapiens |
| 1215 | 11723378_ | turquoise | centriolin(CNTRL)                                                  | Homo sapiens |
| 1216 | 11723400_ | turquoise | serine/threonine kinase 4(STK4)                                    | Homo sapiens |
| 1217 | 11723401_ | turquoise | serine/threonine kinase 4(STK4)                                    | Homo sapiens |
| 1218 | 11723402_ | turquoise | serine/threonine kinase 4(STK4)                                    | Homo sapiens |
| 1219 | 11723404_ | blue      | PPARG coactivator 1 alpha(PPARGC1A)                                | Homo sapiens |
| 1220 | 11723408_ | turquoise | McKusick-Kaufman syndrome(MKKS)                                    | Homo sapiens |
| 1221 | 11723409_ | turquoise | McKusick-Kaufman syndrome(MKKS)                                    | Homo sapiens |
| 1222 | 11723419_ | turquoise | collagen type IX alpha 3 chain(COL9A3)                             | Homo sapiens |
| 1223 | 11723424_ | turquoise | interferon alpha and beta receptor subunit 1(IFNAR1)               | Homo sapiens |
| 1224 | 11723425_ | turquoise | interferon alpha and beta receptor subunit 1(IFNAR1)               | Homo sapiens |
| 1225 | 11723426_ | brown     | electron transfer flavoprotein beta subunit(ETFB)                  | Homo sapiens |
| 1226 | 11723437_ | turquoise | centrosomal protein 41(CEP41)                                      | Homo sapiens |
| 1227 | 11723447_ | turquoise | mal, T-cell differentiation protein like(MALL)                     | Homo sapiens |
| 1228 | 11723448_ | turquoise | mal, T-cell differentiation protein like(MALL)                     | Homo sapiens |
| 1229 | 11723449_ | brown     | NADH:ubiquinone oxidoreductase subunit V3(NDUFV3)                  | Homo sapiens |
| 1230 | 11723467_ | brown     | NADH:ubiquinone oxidoreductase subunit A3(NDUFA3)                  | Homo sapiens |
| 1231 | 11723469_ | turquoise | lysophosphatidylglycerol acyltransferase 1(LPGAT1)                 | Homo sapiens |
| 1232 | 11723491_ | turquoise | Rho guanine nucleotide exchange factor 3(ARHGEF3)                  | Homo sapiens |
| 1233 | 11723492_ | turquoise | Rho guanine nucleotide exchange factor 3(ARHGEF3)                  | Homo sapiens |
| 1234 | 11723494_ | turquoise | ring finger protein 166(RNF166)                                    | Homo sapiens |
| 1235 | 11723516_ | turquoise | calcium binding protein 39 like(CAB39L)                            | Homo sapiens |
| 1236 | 11723534_ | turquoise | breast cancer metastasis-suppressor 1-like(BRMS1L)                 | Homo sapiens |
| 1237 | 11723537_ | turquoise | Rho GTPase activating protein 45(ARHGAP45)                         | Homo sapiens |
| 1238 | 11723545_ | turquoise | phospholipase D1(PLD1)                                             | Homo sapiens |
| 1239 | 11723546_ | turquoise | phospholipase D1(PLD1)                                             | Homo sapiens |
| 1240 | 11723566_ | blue      | calpain 7(CAPN7)                                                   | Homo sapiens |
| 1241 | 11723590_ | turquoise | tetratricopeptide repeat domain 13(TTC13)                          | Homo sapiens |
| 1242 | 11723591_ | turquoise | leucine rich repeat containing 8 family member C(LRRC8C)           | Homo sapiens |
| 1243 | 11723592_ | turquoise | leucine rich repeat containing 8 family member C(LRRC8C)           | Homo sapiens |
| 1244 | 11723604_ | turquoise | inositol polyphosphate-5-phosphatase J(INPP5J)                     | Homo sapiens |
| 1245 | 11723605_ | turquoise | PC-esterase domain containing 1B(PCED1B)                           | Homo sapiens |
| 1246 | 11723623_ | turquoise | tripartite motif containing 21(TRIM21)                             | Homo sapiens |
| 1247 | 11723638_ | turquoise | chromosome 11 open reading frame 58(C11orf58)                      | Homo sapiens |
| 1248 | 11723639_ | turquoise | chromosome 11 open reading frame 58(C11orf58)                      | Homo sapiens |

|      |                    |                                                              |              |
|------|--------------------|--------------------------------------------------------------|--------------|
| 1249 | 11723679_turquoise | CD69 molecule(CD69)                                          | Homo sapiens |
| 1250 | 11723689_turquoise | cAMP responsive element binding protein like 2(CREBL2)       | Homo sapiens |
| 1251 | 11723690_turquoise | cAMP responsive element binding protein like 2(CREBL2)       | Homo sapiens |
| 1252 | 11723695_brown     | heat shock transcription factor 1(HSF1)                      | Homo sapiens |
| 1253 | 11723697_turquoise | Fli-1 proto-oncogene, ETS transcription factor(FLI1)         | Homo sapiens |
| 1254 | 11723698_turquoise | 2'-5'-oligoadenylate synthetase 3(OAS3)                      | Homo sapiens |
| 1255 | 11723699_turquoise | 2'-5'-oligoadenylate synthetase 3(OAS3)                      | Homo sapiens |
| 1256 | 11723771_turquoise | microtubule associated serine/threonine kinase like(MASTL)   | Homo sapiens |
| 1257 | 11723795_turquoise | solute carrier family 29 member 2(SLC29A2)                   | Homo sapiens |
| 1258 | 11723821_turquoise | SMAD specific E3 ubiquitin protein ligase 2(SMURF2)          | Homo sapiens |
| 1259 | 11723826_turquoise | chromosome 2 open reading frame 88(C2orf88)                  | Homo sapiens |
| 1260 | 11723847_turquoise | ATPase phospholipid transporting 11C(ATP11C)                 | Homo sapiens |
| 1261 | 11723849_turquoise | membrane spanning 4-domains A6A(MS4A6A)                      | Homo sapiens |
| 1262 | 11723850_turquoise | outer dense fiber of sperm tails 2 like(ODF2L)               | Homo sapiens |
| 1263 | 11723851_turquoise | outer dense fiber of sperm tails 2 like(ODF2L)               | Homo sapiens |
| 1264 | 11723853_turquoise | B-cell CLL/lymphoma 11A(BCL11A)                              | Homo sapiens |
| 1265 | 11723854_turquoise | sterile alpha motif domain containing 9(SAMD9)               | Homo sapiens |
| 1266 | 11723863_turquoise | dedicator of cytokinesis 10(DOCK10)                          | Homo sapiens |
| 1267 | 11723871_turquoise | dedicator of cytokinesis 2(DOCK2)                            | Homo sapiens |
| 1268 | 11723894_turquoise | telomerase associated protein 1(TEP1)                        | Homo sapiens |
| 1269 | 11723895_turquoise | telomerase associated protein 1(TEP1)                        | Homo sapiens |
| 1270 | 11723899_turquoise | dehydrogenase/reductase 9(DHRS9)                             | Homo sapiens |
| 1271 | 11723902_turquoise | pleckstrin homology and RhoGEF domain containing G1(PLEKHG1) | Homo sapiens |
| 1272 | 11723903_turquoise | pleckstrin homology and RhoGEF domain containing G1(PLEKHG1) | Homo sapiens |
| 1273 | 11723910_turquoise | chemerin chemokine-like receptor 1(CMKLR1)                   | Homo sapiens |
| 1274 | 11723946_turquoise | acyl-CoA synthetase long-chain family member 5(ACSL5)        | Homo sapiens |
| 1275 | 11723947_turquoise | acyl-CoA synthetase long-chain family member 5(ACSL5)        | Homo sapiens |
| 1276 | 11723964_turquoise | aspartylglucosaminidase(AGA)                                 | Homo sapiens |
| 1277 | 11723973_turquoise | carbohydrate sulfotransferase 12(CHST12)                     | Homo sapiens |
| 1278 | 11723974_turquoise | apolipoprotein L3(APOL3)                                     | Homo sapiens |
| 1279 | 11723975_turquoise | apolipoprotein L3(APOL3)                                     | Homo sapiens |
| 1280 | 11723977_turquoise | RAB3A, member RAS oncogene family(RAB3A)                     | Homo sapiens |
| 1281 | 11723978_turquoise | RAB3A, member RAS oncogene family(RAB3A)                     | Homo sapiens |
| 1282 | 11723979_turquoise | phosphorylase kinase regulatory subunit alpha 2(PHKA2)       | Homo sapiens |
| 1283 | 11723991_turquoise | ALG6, alpha-1,3-glucosyltransferase(ALG6)                    | Homo sapiens |
| 1284 | 11723995_turquoise | glucocorticoid induced 1(GLCCI1)                             | Homo sapiens |
| 1285 | 11723996_turquoise | glucocorticoid induced 1(GLCCI1)                             | Homo sapiens |
| 1286 | 11723997_turquoise | NFKB inhibitor interacting Ras like 1(NKIRAS1)               | Homo sapiens |
| 1287 | 11724004_turquoise | FYN binding protein(FYB)                                     | Homo sapiens |
| 1288 | 11724005_turquoise | FYN binding protein(FYB)                                     | Homo sapiens |
| 1289 | 11724006_turquoise | ectonucleoside triphosphate diphosphohydrolase 1(ENTPD1)     | Homo sapiens |
| 1290 | 11724008_turquoise | ectonucleoside triphosphate diphosphohydrolase 1(ENTPD1)     | Homo sapiens |
| 1291 | 11724013_turquoise | sterol O-acyltransferase 1(SOAT1)                            | Homo sapiens |
| 1292 | 11724014_turquoise | sterol O-acyltransferase 1(SOAT1)                            | Homo sapiens |
| 1293 | 11724033_turquoise | CD2 associated protein(CD2AP)                                | Homo sapiens |
| 1294 | 11724037_turquoise | prostaglandin-endoperoxide synthase 2(PTGS2)                 | Homo sapiens |
| 1295 | 11724058_turquoise | ceramide-1-phosphate transfer protein(CPTP)                  | Homo sapiens |
| 1296 | 11724061_turquoise | oxysterol binding protein like 1A(OSBPL1A)                   | Homo sapiens |
| 1297 | 11724082_turquoise | torsin family 2 member A(TOR2A)                              | Homo sapiens |
| 1298 | 11724102_turquoise | PDZ domain containing ring finger 3(PDZRN3)                  | Homo sapiens |

|      |                    |                                                                              |              |
|------|--------------------|------------------------------------------------------------------------------|--------------|
| 1299 | 11724103_turquoise | C8orf44-SGK3 readthrough(C8orf44-SGK3)                                       | Homo sapiens |
| 1300 | 11724104_turquoise | C8orf44-SGK3 readthrough(C8orf44-SGK3)                                       | Homo sapiens |
| 1301 | 11724106_turquoise | basic leucine zipper ATF-like transcription factor 2(BATF2)                  | Homo sapiens |
| 1302 | 11724117_turquoise | sterile alpha motif domain containing 9 like(SAMD9L)                         | Homo sapiens |
| 1303 | 11724118_turquoise | sterile alpha motif domain containing 9 like(SAMD9L)                         | Homo sapiens |
| 1304 | 11724119_turquoise | sterile alpha motif domain containing 9 like(SAMD9L)                         | Homo sapiens |
| 1305 | 11724145_turquoise | solute carrier family 37 member 1(SLC37A1)                                   | Homo sapiens |
| 1306 | 11724149_turquoise | src kinase associated phosphoprotein 1(SKAP1)                                | Homo sapiens |
| 1307 | 11724159_turquoise | endothelial cell surface expressed chemotaxis and apoptosis regulator(ECSCR) | Homo sapiens |
| 1308 | 11724163_turquoise | major histocompatibility complex, class II, DO beta(HLA-DOB)                 | Homo sapiens |
| 1309 | 11724166_turquoise | collagen beta(1-O)galactosyltransferase 2(COLGALT2)                          | Homo sapiens |
| 1310 | 11724167_turquoise | collagen beta(1-O)galactosyltransferase 2(COLGALT2)                          | Homo sapiens |
| 1311 | 11724172_turquoise | FCH domain only 2(FCHO2)                                                     | Homo sapiens |
| 1312 | 11724188_turquoise | poly(ADP-ribose) polymerase family member 10(PARP10)                         | Homo sapiens |
| 1313 | 11724192_turquoise | COP9 signalosome subunit 2(COPS2)                                            | Homo sapiens |
| 1314 | 11724201_turquoise | transmembrane protein 143(TMEM143)                                           | Homo sapiens |
| 1315 | 11724214_turquoise | SPRY domain containing 4(SPRYD4)                                             | Homo sapiens |
| 1316 | 11724224_turquoise | adenosine monophosphate deaminase 2(AMPD2)                                   | Homo sapiens |
| 1317 | 11724226_turquoise | microRNA 6748(MIR6748)                                                       | Homo sapiens |
| 1318 | 11724236_turquoise | receptor interacting serine/threonine kinase 2(RIPK2)                        | Homo sapiens |
| 1319 | 11724237_turquoise | linker for activation of T-cells family member 2(LAT2)                       | Homo sapiens |
| 1320 | 11724255_turquoise | 2'-5'-oligoadenylate synthetase 1(OAS1)                                      | Homo sapiens |
| 1321 | 11724256_turquoise | 2'-5'-oligoadenylate synthetase 1(OAS1)                                      | Homo sapiens |
| 1322 | 11724264_brown     | intraflagellar transport 22(IFIT22)                                          | Homo sapiens |
| 1323 | 11724271_turquoise | HLF, PAR bZIP transcription factor(HLF)                                      | Homo sapiens |
| 1324 | 11724272_turquoise | HLF, PAR bZIP transcription factor(HLF)                                      | Homo sapiens |
| 1325 | 11724296_turquoise | bone morphogenetic protein 7(BMP7)                                           | Homo sapiens |
| 1326 | 11724297_turquoise | bone morphogenetic protein 7(BMP7)                                           | Homo sapiens |
| 1327 | 11724310_turquoise | SH3 domain binding protein 2(SH3BP2)                                         | Homo sapiens |
| 1328 | 11724311_turquoise | SH3 domain binding protein 2(SH3BP2)                                         | Homo sapiens |
| 1329 | 11724312_turquoise | SH3 domain binding protein 2(SH3BP2)                                         | Homo sapiens |
| 1330 | 11724326_turquoise | Rho GTPase activating protein 25(ARHGAP25)                                   | Homo sapiens |
| 1331 | 11724328_turquoise | ubiquitin conjugating enzyme E2 C(UBE2C)                                     | Homo sapiens |
| 1332 | 11724343_turquoise | integrin subunit alpha 4(ITGA4)                                              | Homo sapiens |
| 1333 | 11724344_turquoise | integrin subunit alpha 4(ITGA4)                                              | Homo sapiens |
| 1334 | 11724345_turquoise | integrin subunit alpha 4(ITGA4)                                              | Homo sapiens |
| 1335 | 11724346_turquoise | interferon induced with helicase C domain 1(IFIH1)                           | Homo sapiens |
| 1336 | 11724347_turquoise | astrotactin 2(ASTN2)                                                         | Homo sapiens |
| 1337 | 11724348_turquoise | astrotactin 2(ASTN2)                                                         | Homo sapiens |
| 1338 | 11724350_blue      | protein phosphatase 1 regulatory inhibitor subunit 14C(PPP1R14C)             | Homo sapiens |
| 1339 | 11724354_turquoise | autophagy related 16 like 2(ATG16L2)                                         | Homo sapiens |
| 1340 | 11724356_brown     | transmembrane protein 177(TMEM177)                                           | Homo sapiens |
| 1341 | 11724357_turquoise | myosin VA(MYO5A)                                                             | Homo sapiens |
| 1342 | 11724358_turquoise | myosin VA(MYO5A)                                                             | Homo sapiens |
| 1343 | 11724360_turquoise | beta-transducin repeat containing E3 ubiquitin protein ligase(BTRC)          | Homo sapiens |
| 1344 | 11724361_turquoise | phosphoinositide kinase, FYVE-type zinc finger containing(PIKFYVE)           | Homo sapiens |
| 1345 | 11724374_turquoise | basic leucine zipper ATF-like transcription factor(BATF)                     | Homo sapiens |
| 1346 | 11724375_turquoise | phosphoprotein membrane anchor with glycosphingolipid microdomains 1(PAG1)   | Homo sapiens |
| 1347 | 11724377_turquoise | phosphoprotein membrane anchor with glycosphingolipid microdomains 1(PAG1)   | Homo sapiens |
| 1348 | 11724378_turquoise | phosphoprotein membrane anchor with glycosphingolipid microdomains 1(PAG1)   | Homo sapiens |

|      |                    |                                                                    |              |
|------|--------------------|--------------------------------------------------------------------|--------------|
| 1349 | 11724381_turquoise | family with sequence similarity 65 member B(FAM65B)                | Homo sapiens |
| 1350 | 11724391_turquoise | aspartate beta-hydroxylase domain containing 2(ASPHD2)             | Homo sapiens |
| 1351 | 11724392_turquoise | aspartate beta-hydroxylase domain containing 2(ASPHD2)             | Homo sapiens |
| 1352 | 11724399_turquoise | DEAD-box helicase 60-like(DDX60L)                                  | Homo sapiens |
| 1353 | 11724404_turquoise | Wilms tumor 1 associated protein(WTAP)                             | Homo sapiens |
| 1354 | 11724424_turquoise | G protein-coupled receptor 68(GPR68)                               | Homo sapiens |
| 1355 | 11724432_turquoise | trafficking protein particle complex 2(TRAPPC2)                    | Homo sapiens |
| 1356 | 11724435_turquoise | thiamin pyrophosphokinase 1(TPK1)                                  | Homo sapiens |
| 1357 | 11724465_turquoise | anillin actin binding protein(ANLN)                                | Homo sapiens |
| 1358 | 11724485_turquoise | c-src tyrosine kinase(CSK)                                         | Homo sapiens |
| 1359 | 11724499_turquoise | MFNG O-fucosylpeptide 3-beta-N-acetylglucosaminyltransferase(MFNG) | Homo sapiens |
| 1360 | 11724509_turquoise | phorbol-12-myristate-13-acetate-induced protein 1(PMAIP1)          | Homo sapiens |
| 1361 | 11724510_turquoise | phorbol-12-myristate-13-acetate-induced protein 1(PMAIP1)          | Homo sapiens |
| 1362 | 11724559_turquoise | G protein subunit alpha 15(GNA15)                                  | Homo sapiens |
| 1363 | 11724565_turquoise | talin 2(TLN2)                                                      | Homo sapiens |
| 1364 | 11724594_brown     | HRAS like suppressor(HRASLS)                                       | Homo sapiens |
| 1365 | 11724595_turquoise | retinitis pigmentosa 2 (X-linked recessive)(RP2)                   | Homo sapiens |
| 1366 | 11724596_turquoise | TRAF family member associated NFKB activator(TANK)                 | Homo sapiens |
| 1367 | 11724601_turquoise | endoplasmic reticulum aminopeptidase 1(ERAP1)                      | Homo sapiens |
| 1368 | 11724602_turquoise | endoplasmic reticulum aminopeptidase 1(ERAP1)                      | Homo sapiens |
| 1369 | 11724640_turquoise | Rho GTPase activating protein 44(ARHGAP44)                         | Homo sapiens |
| 1370 | 11724656_turquoise | mitogen-activated protein kinase kinase kinase kinase 1(MAP4K1)    | Homo sapiens |
| 1371 | 11724669_brown     | mitochondrial ribosomal protein S22(MRPS22)                        | Homo sapiens |
| 1372 | 11724673_turquoise | branched chain keto acid dehydrogenase E1 subunit beta(BCKDHB)     | Homo sapiens |
| 1373 | 11724678_turquoise | lymphocyte antigen 86(LY86)                                        | Homo sapiens |
| 1374 | 11724682_turquoise | transforming growth factor beta receptor 2(TGFBR2)                 | Homo sapiens |
| 1375 | 11724683_turquoise | CD300a molecule(CD300A)                                            | Homo sapiens |
| 1376 | 11724685_turquoise | interferon alpha and beta receptor subunit 2(IFNAR2)               | Homo sapiens |
| 1377 | 11724686_turquoise | interferon alpha and beta receptor subunit 2(IFNAR2)               | Homo sapiens |
| 1378 | 11724701_turquoise | BORCS7-ASMT readthrough (NMD candidate)(BORCS7-ASMT)               | Homo sapiens |
| 1379 | 11724728_turquoise | CD8a molecule(CD8A)                                                | Homo sapiens |
| 1380 | 11724729_turquoise | CD8a molecule(CD8A)                                                | Homo sapiens |
| 1381 | 11724732_turquoise | tubulin beta class I(TUBB)                                         | Homo sapiens |
| 1382 | 11724765_blue      | FAST kinase domains 2(FASTKD2)                                     | Homo sapiens |
| 1383 | 11724766_turquoise | FAST kinase domains 2(FASTKD2)                                     | Homo sapiens |
| 1384 | 11724768_turquoise | Fc fragment of IgG receptor IIa(FCGR2A)                            | Homo sapiens |
| 1385 | 11724769_turquoise | Fc fragment of IgG receptor IIa(FCGR2A)                            | Homo sapiens |
| 1386 | 11724770_turquoise | Fc fragment of IgG receptor IIa(FCGR2A)                            | Homo sapiens |
| 1387 | 11724771_turquoise | Fc fragment of IgG receptor IIa(FCGR2A)                            | Homo sapiens |
| 1388 | 11724775_turquoise | ferredoxin 1(FDX1)                                                 | Homo sapiens |
| 1389 | 11724776_turquoise | phosphoglucomutase 2 like 1(PGM2L1)                                | Homo sapiens |
| 1390 | 11724780_brown     | mitochondrial ribosomal protein S17(MRPS17)                        | Homo sapiens |
| 1391 | 11724793_turquoise | phosphatidylglycerophosphate synthase 1(PGS1)                      | Homo sapiens |
| 1392 | 11724799_turquoise | major histocompatibility complex, class II, DQ alpha 1(HLA-DQA1)   | Homo sapiens |
| 1393 | 11724800_turquoise | quinolinate phosphoribosyltransferase(QPRT)                        | Homo sapiens |
| 1394 | 11724804_turquoise | leukocyte associated immunoglobulin like receptor 1(LAIR1)         | Homo sapiens |
| 1395 | 11724805_turquoise | leukocyte associated immunoglobulin like receptor 1(LAIR1)         | Homo sapiens |
| 1396 | 11724807_turquoise | Cbl proto-oncogene(CBL)                                            | Homo sapiens |
| 1397 | 11724810_turquoise | Cbl proto-oncogene(CBL)                                            | Homo sapiens |
| 1398 | 11724817_turquoise | SH3 domain containing kinase binding protein 1(SH3KBP1)            | Homo sapiens |

|      |                    |                                                                                     |              |
|------|--------------------|-------------------------------------------------------------------------------------|--------------|
| 1399 | 11724820_turquoise | NIMA related kinase 6(NEK6)                                                         | Homo sapiens |
| 1400 | 11724821_turquoise | NIMA related kinase 6(NEK6)                                                         | Homo sapiens |
| 1401 | 11724844_turquoise | abhydrolase domain containing 17A(ABHD17A)                                          | Homo sapiens |
| 1402 | 11724851_turquoise | syntaxin binding protein 6(STXBP6)                                                  | Homo sapiens |
| 1403 | 11724853_turquoise | LDL receptor related protein 3(LRP3)                                                | Homo sapiens |
| 1404 | 11724857_turquoise | centrosomal protein 63(CEP63)                                                       | Homo sapiens |
| 1405 | 11724862_turquoise | threonine synthase like 1(THNSL1)                                                   | Homo sapiens |
| 1406 | 11724881_turquoise | zinc finger protein 217(ZNF217)                                                     | Homo sapiens |
| 1407 | 11724883_turquoise | hyaluronan and proteoglycan link protein 3(HAPLN3)                                  | Homo sapiens |
| 1408 | 11724884_turquoise | hyaluronan and proteoglycan link protein 3(HAPLN3)                                  | Homo sapiens |
| 1409 | 11724900_turquoise | granzyme B(GZMB)                                                                    | Homo sapiens |
| 1410 | 11724904_turquoise | TIMP metalloproteinase inhibitor 4(TIMPI4)                                          | Homo sapiens |
| 1411 | 11724908_turquoise | dynein cytoplasmic 1 intermediate chain 1(DYNC1I1)                                  | Homo sapiens |
| 1412 | 11724921_turquoise | vacuolar protein sorting 13 homolog B(VPS13B)                                       | Homo sapiens |
| 1413 | 11724944_turquoise | calystenin 2(CLSTN2)                                                                | Homo sapiens |
| 1414 | 11724947_turquoise | membrane associated guanylate kinase, WW and PDZ domain containing 2(MAGI2)         | Homo sapiens |
| 1415 | 11724954_turquoise | mannose receptor, C type 1(MRC1)                                                    | Homo sapiens |
| 1416 | 11724958_turquoise | 5',3'-nucleotidase, mitochondrial(NT5M)                                             | Homo sapiens |
| 1417 | 11724963_turquoise | F-box protein 5(FBXO5)                                                              | Homo sapiens |
| 1418 | 11724979_turquoise | dipeptidase 2(DPEP2)                                                                | Homo sapiens |
| 1419 | 11724997_turquoise | CD86 molecule(CD86)                                                                 | Homo sapiens |
| 1420 | 11724998_turquoise | CD86 molecule(CD86)                                                                 | Homo sapiens |
| 1421 | 11725011_turquoise | centrosomal protein 78(CEP78)                                                       | Homo sapiens |
| 1422 | 11725013_turquoise | methylmalonic aciduria (cobalamin deficiency) cblC type, with homocystinuria(MMACH) | Homo sapiens |
| 1423 | 11725042_turquoise | tyrosine 3-monooxygenase/tryptophan 5-monooxygenase activation protein beta(YWH)    | Homo sapiens |
| 1424 | 11725044_turquoise | tyrosine 3-monooxygenase/tryptophan 5-monooxygenase activation protein beta(YWH)    | Homo sapiens |
| 1425 | 11725084_blue      | ubiquitin C-terminal hydrolase L5(UCHL5)                                            | Homo sapiens |
| 1426 | 11725091_turquoise | regulatory factor X5(RFX5)                                                          | Homo sapiens |
| 1427 | 11725092_turquoise | regulatory factor X5(RFX5)                                                          | Homo sapiens |
| 1428 | 11725093_turquoise | regulatory factor X5(RFX5)                                                          | Homo sapiens |
| 1429 | 11725095_turquoise | tetratricopeptide repeat domain 33(TTC33)                                           | Homo sapiens |
| 1430 | 11725110_turquoise | nudE neurodevelopment protein 1(NDE1)                                               | Homo sapiens |
| 1431 | 11725124_turquoise | cystatin F(CST7)                                                                    | Homo sapiens |
| 1432 | 11725135_turquoise | VPS16, CORVET/HOPS core subunit(VPS16)                                              | Homo sapiens |
| 1433 | 11725137_brown     | synaptogyrin 1(SYNGR1)                                                              | Homo sapiens |
| 1434 | 11725144_turquoise | zinc finger protein 784(ZNF784)                                                     | Homo sapiens |
| 1435 | 11725153_turquoise | nuclear factor kappa B subunit 2(NFKB2)                                             | Homo sapiens |
| 1436 | 11725155_turquoise | four jointed box 1(FJX1)                                                            | Homo sapiens |
| 1437 | 11725174_turquoise | ArfGAP with dual PH domains 2(ADAP2)                                                | Homo sapiens |
| 1438 | 11725175_turquoise | ArfGAP with dual PH domains 2(ADAP2)                                                | Homo sapiens |
| 1439 | 11725180_turquoise | runt related transcription factor 2(RUNX2)                                          | Homo sapiens |
| 1440 | 11725228_turquoise | pyrimidineric receptor P2Y6(P2RY6)                                                  | Homo sapiens |
| 1441 | 11725232_turquoise | ATPase phospholipid transporting 8B2(ATP8B2)                                        | Homo sapiens |
| 1442 | 11725237_blue      | RNA binding protein with multiple splicing 2(RBPMS2)                                | Homo sapiens |
| 1443 | 11725238_turquoise | RNA binding protein with multiple splicing 2(RBPMS2)                                | Homo sapiens |
| 1444 | 11725240_turquoise | receptor transporter protein 4(RTP4)                                                | Homo sapiens |
| 1445 | 11725249_turquoise | lymphocyte antigen 75(LY75)                                                         | Homo sapiens |
| 1446 | 11725255_turquoise | interleukin 15(IL15)                                                                | Homo sapiens |
| 1447 | 11725280_turquoise | PR/SET domain 8(PRDM8)                                                              | Homo sapiens |
| 1448 | 11725315_turquoise | PRELI domain containing 1(PRELID1)                                                  | Homo sapiens |

|      |                    |                                                                 |              |
|------|--------------------|-----------------------------------------------------------------|--------------|
| 1449 | 11725351_turquoise | KIAA0930(KIAA0930)                                              | Homo sapiens |
| 1450 | 11725352_turquoise | KIAA0930(KIAA0930)                                              | Homo sapiens |
| 1451 | 11725373_turquoise | TNFRSF1A associated via death domain(TRADD)                     | Homo sapiens |
| 1452 | 11725379_turquoise | protein O-glucosyltransferase 1(POGLUT1)                        | Homo sapiens |
| 1453 | 11725380_turquoise | protein O-glucosyltransferase 1(POGLUT1)                        | Homo sapiens |
| 1454 | 11725385_turquoise | UDP-glucose ceramide glucosyltransferase(UGCG)                  | Homo sapiens |
| 1455 | 11725389_turquoise | CD6 molecule(CD6)                                               | Homo sapiens |
| 1456 | 11725403_turquoise | transmembrane 4 L six family member 18(TM4SF18)                 | Homo sapiens |
| 1457 | 11725412_turquoise | tripartite motif containing 14(TRIM14)                          | Homo sapiens |
| 1458 | 11725413_turquoise | tripartite motif containing 14(TRIM14)                          | Homo sapiens |
| 1459 | 11725416_turquoise | natural killer cell granule protein 7(NKG7)                     | Homo sapiens |
| 1460 | 11725419_turquoise | lysophosphatidylcholine acyltransferase 2(LPCAT2)               | Homo sapiens |
| 1461 | 11725424_turquoise | RAB27A, member RAS oncogene family(RAB27A)                      | Homo sapiens |
| 1462 | 11725425_turquoise | RAB27A, member RAS oncogene family(RAB27A)                      | Homo sapiens |
| 1463 | 11725426_turquoise | RAB27A, member RAS oncogene family(RAB27A)                      | Homo sapiens |
| 1464 | 11725429_turquoise | lysosomal associated membrane protein 3(LAMP3)                  | Homo sapiens |
| 1465 | 11725437_turquoise | SPRY domain containing 7(SPRYD7)                                | Homo sapiens |
| 1466 | 11725440_turquoise | lysophosphatidic acid receptor 2(LPAR2)                         | Homo sapiens |
| 1467 | 11725444_turquoise | C-C motif chemokine receptor 1(CCR1)                            | Homo sapiens |
| 1468 | 11725445_turquoise | microRNA 8085(MIR8085)                                          | Homo sapiens |
| 1469 | 11725448_turquoise | folliculin(FLCN)                                                | Homo sapiens |
| 1470 | 11725455_turquoise | CD247 molecule(CD247)                                           | Homo sapiens |
| 1471 | 11725471_turquoise | mannosidase alpha class 2A member 1(MAN2A1)                     | Homo sapiens |
| 1472 | 11725472_turquoise | progesterin and adipoQ receptor family member 8(PAQR8)          | Homo sapiens |
| 1473 | 11725473_turquoise | progesterin and adipoQ receptor family member 8(PAQR8)          | Homo sapiens |
| 1474 | 11725476_turquoise | ArfGAP with coiled-coil, ankyrin repeat and PH domains 1(ACAP1) | Homo sapiens |
| 1475 | 11725481_turquoise | CD27 molecule(CD27)                                             | Homo sapiens |
| 1476 | 11725485_turquoise | disrupted in renal carcinoma 2(DIRC2)                           | Homo sapiens |
| 1477 | 11725492_turquoise | RAB20, member RAS oncogene family(RAB20)                        | Homo sapiens |
| 1478 | 11725498_turquoise | transmembrane protein 117(TMEM117)                              | Homo sapiens |
| 1479 | 11725522_turquoise | mesoderm posterior bHLH transcription factor 1(MESP1)           | Homo sapiens |
| 1480 | 11725523_turquoise | desmoglein 2(DSG2)                                              | Homo sapiens |
| 1481 | 11725524_turquoise | desmoglein 2(DSG2)                                              | Homo sapiens |
| 1482 | 11725525_blue      | desmoglein 2(DSG2)                                              | Homo sapiens |
| 1483 | 11725537_turquoise | zinc and ring finger 3(ZNRF3)                                   | Homo sapiens |
| 1484 | 11725563_brown     | chromosome 12 open reading frame 60(C12orf60)                   | Homo sapiens |
| 1485 | 11725590_brown     | nudix hydrolase 6(NUDT6)                                        | Homo sapiens |
| 1486 | 11725612_brown     | ARMC2 antisense RNA 1(ARMC2-AS1)                                | Homo sapiens |
| 1487 | 11725617_turquoise | heterogeneous nuclear ribonucleoprotein R(HNRNPR)               | Homo sapiens |
| 1488 | 11725620_blue      | pyruvate dehydrogenase (lipoamide) beta(PDHB)                   | Homo sapiens |
| 1489 | 11725629_turquoise | 2',3'-cyclic nucleotide 3' phosphodiesterase(CNP)               | Homo sapiens |
| 1490 | 11725634_turquoise | mitochondrial ribosomal protein S25(MRPS25)                     | Homo sapiens |
| 1491 | 11725635_brown     | mitochondrial ribosomal protein S25(MRPS25)                     | Homo sapiens |
| 1492 | 11725636_turquoise | MOB kinase activator 1A(MOB1A)                                  | Homo sapiens |
| 1493 | 11725641_turquoise | EF-hand domain family member D2(EFHD2)                          | Homo sapiens |
| 1494 | 11725642_turquoise | EF-hand domain family member D2(EFHD2)                          | Homo sapiens |
| 1495 | 11725643_brown     | mitochondrial ribosomal protein S26(MRPS26)                     | Homo sapiens |
| 1496 | 11725650_turquoise | DDB1 and CUL4 associated factor 5(DCAF5)                        | Homo sapiens |
| 1497 | 11725657_turquoise | zinc finger with UFM1 specific peptidase domain(ZUFSP)          | Homo sapiens |
| 1498 | 11725682_blue      | MRS2, magnesium transporter(MRS2)                               | Homo sapiens |



|      |                    |                                                                                         |              |
|------|--------------------|-----------------------------------------------------------------------------------------|--------------|
| 1499 | 11725683_turquoise | MRS2, magnesium transporter(MRS2)                                                       | Homo sapiens |
| 1500 | 11725684_turquoise | protein tyrosine phosphatase, receptor type O(PTPRO)                                    | Homo sapiens |
| 1501 | 11725685_turquoise | protein tyrosine phosphatase, receptor type O(PTPRO)                                    | Homo sapiens |
| 1502 | 11725697_turquoise | tripartite motif containing 56(TRIM56)                                                  | Homo sapiens |
| 1503 | 11725712_turquoise | peptidyl-prolyl cis-trans isomerase A pseudogene(LOC101060363)                          | Homo sapiens |
| 1504 | 11725729_turquoise | chromosome 1 open reading frame 56(C1orf56)                                             | Homo sapiens |
| 1505 | 11725746_turquoise | phosphatidylinositol transfer protein, cytoplasmic 1(PITPNC1)                           | Homo sapiens |
| 1506 | 11725755_turquoise | butyrophilin subfamily 2 member A2(BTN2A2)                                              | Homo sapiens |
| 1507 | 11725782_turquoise | annexin A2 receptor(ANXA2R)                                                             | Homo sapiens |
| 1508 | 11725789_turquoise | dihydropyrimidine dehydrogenase(DPYD)                                                   | Homo sapiens |
| 1509 | 11725790_turquoise | dihydropyrimidine dehydrogenase(DPYD)                                                   | Homo sapiens |
| 1510 | 11725793_turquoise | prostaglandin E receptor 4(PTGER4)                                                      | Homo sapiens |
| 1511 | 11725794_turquoise | prostaglandin E receptor 4(PTGER4)                                                      | Homo sapiens |
| 1512 | 11725803_turquoise | chromosome 21 open reading frame 91(C21orf91)                                           | Homo sapiens |
| 1513 | 11725804_turquoise | chromosome 21 open reading frame 91(C21orf91)                                           | Homo sapiens |
| 1514 | 11725811_turquoise | phospholipase A2 group V(PLA2G5)                                                        | Homo sapiens |
| 1515 | 11725813_turquoise | microtubule associated serine/threonine kinase 3(MAST3)                                 | Homo sapiens |
| 1516 | 11725842_turquoise | PIF1 5'-to-3' DNA helicase(PIF1)                                                        | Homo sapiens |
| 1517 | 11725856_turquoise | dynein axonemal heavy chain 1(DNAH1)                                                    | Homo sapiens |
| 1518 | 11725861_turquoise | MYB proto-oncogene like 1(MYBL1)                                                        | Homo sapiens |
| 1519 | 11725876_turquoise | glycosylphosphatidylinositol anchored high density lipoprotein binding protein 1(GPIHB) | Homo sapiens |
| 1520 | 11725887_turquoise | family with sequence similarity 167 member B(FAM167B)                                   | Homo sapiens |
| 1521 | 11725894_blue      | taxilin beta(TXLNB)                                                                     | Homo sapiens |
| 1522 | 11725899_turquoise | leucine rich repeat containing 8 family member D(LRRC8D)                                | Homo sapiens |
| 1523 | 11725910_turquoise | collagen type IV alpha 6 chain(COL4A6)                                                  | Homo sapiens |
| 1524 | 11725912_turquoise | erb-b2 receptor tyrosine kinase 4(ERBB4)                                                | Homo sapiens |
| 1525 | 11725917_turquoise | ring finger protein 19B(RNF19B)                                                         | Homo sapiens |
| 1526 | 11725924_turquoise | Ras association domain family member 5(RASSF5)                                          | Homo sapiens |
| 1527 | 11725935_turquoise | calcium/calmodulin dependent protein kinase II alpha(CAMK2A)                            | Homo sapiens |
| 1528 | 11725957_blue      | translocase of inner mitochondrial membrane 17 homolog A (yeast)(TIMM17A)               | Homo sapiens |
| 1529 | 11725966_turquoise | integrin subunit beta 7(ITGB7)                                                          | Homo sapiens |
| 1530 | 11725970_turquoise | heterogeneous nuclear ribonucleoprotein F(HNRNPF)                                       | Homo sapiens |
| 1531 | 11725971_turquoise | heterogeneous nuclear ribonucleoprotein F(HNRNPF)                                       | Homo sapiens |
| 1532 | 11725972_turquoise | heterogeneous nuclear ribonucleoprotein F(HNRNPF)                                       | Homo sapiens |
| 1533 | 11725973_turquoise | heterogeneous nuclear ribonucleoprotein F(HNRNPF)                                       | Homo sapiens |
| 1534 | 11725981_turquoise | C-C motif chemokine receptor 7(CCR7)                                                    | Homo sapiens |
| 1535 | 11725983_turquoise | basic helix-loop-helix family member e40(BHLHE40)                                       | Homo sapiens |
| 1536 | 11725991_brown     | regulator of microtubule dynamics 1(RMDN1)                                              | Homo sapiens |
| 1537 | 11725998_turquoise | Fas cell surface death receptor(FAS)                                                    | Homo sapiens |
| 1538 | 11725999_turquoise | Fas cell surface death receptor(FAS)                                                    | Homo sapiens |
| 1539 | 11726000_turquoise | copine 4(CPNE4)                                                                         | Homo sapiens |
| 1540 | 11726004_turquoise | layilin(LAYN)                                                                           | Homo sapiens |
| 1541 | 11726034_turquoise | protein tyrosine phosphatase, non-receptor type 6(PTPN6)                                | Homo sapiens |
| 1542 | 11726035_blue      | phosphoglycerate mutase 2(PGAM2)                                                        | Homo sapiens |
| 1543 | 11726040_turquoise | serine/threonine kinase 17b(STK17B)                                                     | Homo sapiens |
| 1544 | 11726041_turquoise | serine/threonine kinase 17b(STK17B)                                                     | Homo sapiens |
| 1545 | 11726042_turquoise | serine/threonine kinase 17b(STK17B)                                                     | Homo sapiens |
| 1546 | 11726056_turquoise | protein phosphatase 4 regulatory subunit 3B(PPP4R3B)                                    | Homo sapiens |
| 1547 | 11726087_blue      | heat shock protein family B (small) member 3(HSPB3)                                     | Homo sapiens |
| 1548 | 11726088_turquoise | phosphatase and actin regulator 3(PHACTR3)                                              | Homo sapiens |

|      |                    |                                                                   |              |
|------|--------------------|-------------------------------------------------------------------|--------------|
| 1549 | 11726089_turquoise | VPS53, GARP complex subunit(VPS53)                                | Homo sapiens |
| 1550 | 11726104_blue      | protein phosphatase 2 regulatory subunit B''alpha(PPP2R3A)        | Homo sapiens |
| 1551 | 11726120_turquoise | BMP2 inducible kinase(BMP2K)                                      | Homo sapiens |
| 1552 | 11726122_turquoise | myosin IF(MYO1F)                                                  | Homo sapiens |
| 1553 | 11726153_yellow    | POU class 2 associating factor 1(POU2AF1)                         | Homo sapiens |
| 1554 | 11726158_turquoise | spindlin family member 4(SPIN4)                                   | Homo sapiens |
| 1555 | 11726168_turquoise | progesterone receptor(PGR)                                        | Homo sapiens |
| 1556 | 11726178_turquoise | SRY-box 6(SOX6)                                                   | Homo sapiens |
| 1557 | 11726179_turquoise | SRY-box 6(SOX6)                                                   | Homo sapiens |
| 1558 | 11726180_turquoise | SRY-box 6(SOX6)                                                   | Homo sapiens |
| 1559 | 11726187_turquoise | shisa family member 3(SHISA3)                                     | Homo sapiens |
| 1560 | 11726188_turquoise | shisa family member 3(SHISA3)                                     | Homo sapiens |
| 1561 | 11726190_turquoise | dedicator of cytokinesis 4(DOCK4)                                 | Homo sapiens |
| 1562 | 11726201_turquoise | 2'-5'-oligoadenylate synthetase 2(OAS2)                           | Homo sapiens |
| 1563 | 11726217_turquoise | PR/SET domain 1(PRDM1)                                            | Homo sapiens |
| 1564 | 11726218_turquoise | PR/SET domain 1(PRDM1)                                            | Homo sapiens |
| 1565 | 11726242_turquoise | transketolase like 1(TKTL1)                                       | Homo sapiens |
| 1566 | 11726254_turquoise | CD74 molecule(CD74)                                               | Homo sapiens |
| 1567 | 11726255_turquoise | CD74 molecule(CD74)                                               | Homo sapiens |
| 1568 | 11726264_brown     | STE20-related kinase adaptor beta(STRADB)                         | Homo sapiens |
| 1569 | 11726286_turquoise | tryptophanyl-tRNA synthetase(WARS)                                | Homo sapiens |
| 1570 | 11726287_turquoise | tryptophanyl-tRNA synthetase(WARS)                                | Homo sapiens |
| 1571 | 11726292_turquoise | WD repeat domain 44(WDR44)                                        | Homo sapiens |
| 1572 | 11726293_turquoise | WD repeat domain 44(WDR44)                                        | Homo sapiens |
| 1573 | 11726294_turquoise | CCAAT/enhancer binding protein alpha(CEBPA)                       | Homo sapiens |
| 1574 | 11726309_turquoise | glycine receptor beta(GLRB)                                       | Homo sapiens |
| 1575 | 11726310_turquoise | glycine receptor beta(GLRB)                                       | Homo sapiens |
| 1576 | 11726311_turquoise | glycine receptor beta(GLRB)                                       | Homo sapiens |
| 1577 | 11726315_turquoise | methyltransferase like 22(METTL22)                                | Homo sapiens |
| 1578 | 11726316_turquoise | selectin E(SELE)                                                  | Homo sapiens |
| 1579 | 11726321_turquoise | endoplasmic reticulum oxidoreductase 1 alpha(ERO1A)               | Homo sapiens |
| 1580 | 11726324_turquoise | cytokine receptor like factor 3(CRLF3)                            | Homo sapiens |
| 1581 | 11726328_turquoise | guanylate binding protein 1(GBP1)                                 | Homo sapiens |
| 1582 | 11726329_turquoise | guanylate binding protein 1(GBP1)                                 | Homo sapiens |
| 1583 | 11726333_turquoise | lymphoid enhancer binding factor 1(LEF1)                          | Homo sapiens |
| 1584 | 11726335_brown     | cardiolipin synthase 1(CRLS1)                                     | Homo sapiens |
| 1585 | 11726337_turquoise | arachidonate 5-lipoxygenase(ALOX5)                                | Homo sapiens |
| 1586 | 11726338_turquoise | arachidonate 5-lipoxygenase(ALOX5)                                | Homo sapiens |
| 1587 | 11726347_turquoise | linker for activation of T-cells family member 2(LAT2)            | Homo sapiens |
| 1588 | 11726350_brown     | ankyrin repeat domain 39(ANKRD39)                                 | Homo sapiens |
| 1589 | 11726353_turquoise | CD180 molecule(CD180)                                             | Homo sapiens |
| 1590 | 11726364_turquoise | 2'-5'-oligoadenylate synthetase like(OASL)                        | Homo sapiens |
| 1591 | 11726366_turquoise | glutamate rich 1(ERIC1)                                           | Homo sapiens |
| 1592 | 11726368_turquoise | glutamate rich 1(ERIC1)                                           | Homo sapiens |
| 1593 | 11726369_turquoise | GRIK1 antisense RNA 2(GRIK1-AS2)                                  | Homo sapiens |
| 1594 | 11726375_turquoise | G protein-coupled receptor 34(GPR34)                              | Homo sapiens |
| 1595 | 11726378_turquoise | Wolf-Hirschhorn syndrome candidate 1(WHSC1)                       | Homo sapiens |
| 1596 | 11726382_turquoise | signaling lymphocytic activation molecule family member 1(SLAMF1) | Homo sapiens |
| 1597 | 11726392_turquoise | GTPase, IMAP family member 2(GIMAP2)                              | Homo sapiens |
| 1598 | 11726410_turquoise | GID complex subunit 4 homolog(GID4)                               | Homo sapiens |

|      |                    |                                                                                      |              |
|------|--------------------|--------------------------------------------------------------------------------------|--------------|
| 1599 | 11726416_turquoise | abl interactor 1(ABI1)                                                               | Homo sapiens |
| 1600 | 11726417_turquoise | abl interactor 1(ABI1)                                                               | Homo sapiens |
| 1601 | 11726418_turquoise | abl interactor 1(ABI1)                                                               | Homo sapiens |
| 1602 | 11726421_turquoise | amyloid beta precursor protein binding family B member 1 interacting protein(APBB1IP | Homo sapiens |
| 1603 | 11726432_turquoise | oxysterol binding protein like 3(OSBPL3)                                             | Homo sapiens |
| 1604 | 11726433_turquoise | oxysterol binding protein like 3(OSBPL3)                                             | Homo sapiens |
| 1605 | 11726464_turquoise | IGF like family receptor 1(IGFLR1)                                                   | Homo sapiens |
| 1606 | 11726473_turquoise | docking protein 3(DOK3)                                                              | Homo sapiens |
| 1607 | 11726479_turquoise | MX dynamin like GTPase 2(MX2)                                                        | Homo sapiens |
| 1608 | 11726494_turquoise | SUMO/sentrin peptidase family member, NEDD8 specific(SENp8)                          | Homo sapiens |
| 1609 | 11726496_blue      | ryanodine receptor 2(RYR2)                                                           | Homo sapiens |
| 1610 | 11726517_turquoise | WD repeat domain 11(WDR11)                                                           | Homo sapiens |
| 1611 | 11726528_turquoise | family with sequence similarity 81 member A(FAM81A)                                  | Homo sapiens |
| 1612 | 11726532_turquoise | cytohesin 4(CYTH4)                                                                   | Homo sapiens |
| 1613 | 11726542_turquoise | transmembrane protein 132C(TMEM132C)                                                 | Homo sapiens |
| 1614 | 11726557_turquoise | gasdermin B(GSDMB)                                                                   | Homo sapiens |
| 1615 | 11726559_turquoise | lymphocyte cytosolic protein 1(LCP1)                                                 | Homo sapiens |
| 1616 | 11726579_turquoise | proteasome activator subunit 1(PSME1)                                                | Homo sapiens |
| 1617 | 11726580_turquoise | proteasome activator subunit 1(PSME1)                                                | Homo sapiens |
| 1618 | 11726594_turquoise | cathepsin Z(CTSZ)                                                                    | Homo sapiens |
| 1619 | 11726608_turquoise | metal response element binding transcription factor 2(MTF2)                          | Homo sapiens |
| 1620 | 11726610_turquoise | metal response element binding transcription factor 2(MTF2)                          | Homo sapiens |
| 1621 | 11726611_turquoise | MAF bZIP transcription factor F(MAFF)                                                | Homo sapiens |
| 1622 | 11726617_turquoise | cyclin dependent kinase 1(CDK1)                                                      | Homo sapiens |
| 1623 | 11726625_turquoise | cyclin G2(CCNG2)                                                                     | Homo sapiens |
| 1624 | 11726628_turquoise | semaphorin 4A(SEMA4A)                                                                | Homo sapiens |
| 1625 | 11726647_turquoise | butyrophilin subfamily 3 member A2(BTN3A2)                                           | Homo sapiens |
| 1626 | 11726655_turquoise | interferon induced protein with tetratricopeptide repeats 5(IFIT5)                   | Homo sapiens |
| 1627 | 11726656_turquoise | interferon induced protein with tetratricopeptide repeats 5(IFIT5)                   | Homo sapiens |
| 1628 | 11726662_brown     | apolipoprotein O(APOO)                                                               | Homo sapiens |
| 1629 | 11726671_turquoise | DNA cross-link repair 1B(DCLRE1B)                                                    | Homo sapiens |
| 1630 | 11726676_blue      | apolipoprotein B mRNA editing enzyme catalytic subunit 2(APOBEC2)                    | Homo sapiens |
| 1631 | 11726677_turquoise | proteasome subunit beta 9(PSMB9)                                                     | Homo sapiens |
| 1632 | 11726689_turquoise | signal transducer and activator of transcription 1(STAT1)                            | Homo sapiens |
| 1633 | 11726690_turquoise | signal transducer and activator of transcription 1(STAT1)                            | Homo sapiens |
| 1634 | 11726700_turquoise | aftiphilin(AFTPH)                                                                    | Homo sapiens |
| 1635 | 11726701_turquoise | aftiphilin(AFTPH)                                                                    | Homo sapiens |
| 1636 | 11726702_turquoise | aftiphilin(AFTPH)                                                                    | Homo sapiens |
| 1637 | 11726703_turquoise | B-cell CLL/lymphoma 10(BCL10)                                                        | Homo sapiens |
| 1638 | 11726704_turquoise | B-cell CLL/lymphoma 10(BCL10)                                                        | Homo sapiens |
| 1639 | 11726707_turquoise | interleukin 34(IL34)                                                                 | Homo sapiens |
| 1640 | 11726723_turquoise | WD repeat and FYVE domain containing 2(WDFY2)                                        | Homo sapiens |
| 1641 | 11726725_turquoise | nucleic acid binding protein 1(NABP1)                                                | Homo sapiens |
| 1642 | 11726726_turquoise | nucleic acid binding protein 1(NABP1)                                                | Homo sapiens |
| 1643 | 11726727_turquoise | nucleic acid binding protein 1(NABP1)                                                | Homo sapiens |
| 1644 | 11726769_turquoise | XIAP associated factor 1(XAF1)                                                       | Homo sapiens |
| 1645 | 11726770_turquoise | XIAP associated factor 1(XAF1)                                                       | Homo sapiens |
| 1646 | 11726771_turquoise | XIAP associated factor 1(XAF1)                                                       | Homo sapiens |
| 1647 | 11726777_turquoise | linker for activation of T-cells(LAT)                                                | Homo sapiens |
| 1648 | 11726779_turquoise | IKBKB interacting protein(IKBIP)                                                     | Homo sapiens |

|      |                    |                                                                     |              |
|------|--------------------|---------------------------------------------------------------------|--------------|
| 1649 | 11726803_turquoise | helicase with zinc finger 2(HELZ2)                                  | Homo sapiens |
| 1650 | 11726820_turquoise | Rho GTPase activating protein 9(ARHGAP9)                            | Homo sapiens |
| 1651 | 11726822_turquoise | chromosome X open reading frame 36(CXorf36)                         | Homo sapiens |
| 1652 | 11726839_turquoise | RELT like 1(RELL1)                                                  | Homo sapiens |
| 1653 | 11726869_turquoise | major facilitator superfamily domain containing 12(MFSD12)          | Homo sapiens |
| 1654 | 11726875_turquoise | promyelocytic leukemia(PML)                                         | Homo sapiens |
| 1655 | 11726876_turquoise | promyelocytic leukemia(PML)                                         | Homo sapiens |
| 1656 | 11726883_turquoise | ATPase family, AAA domain containing 2B(ATAD2B)                     | Homo sapiens |
| 1657 | 11726893_turquoise | microRNA 6132(MIR6132)                                              | Homo sapiens |
| 1658 | 11726928_turquoise | interleukin 18 binding protein(IL18BP)                              | Homo sapiens |
| 1659 | 11726947_turquoise | toll like receptor 8(TLR8)                                          | Homo sapiens |
| 1660 | 11726948_turquoise | toll like receptor 8(TLR8)                                          | Homo sapiens |
| 1661 | 11726963_turquoise | small glutamine rich tetratricopeptide repeat containing beta(SGTB) | Homo sapiens |
| 1662 | 11726974_blue      | PERP, TP53 apoptosis effector(PERP)                                 | Homo sapiens |
| 1663 | 11726975_blue      | PERP, TP53 apoptosis effector(PERP)                                 | Homo sapiens |
| 1664 | 11727005_turquoise | adhesion G protein-coupled receptor L4(ADGRL4)                      | Homo sapiens |
| 1665 | 11727006_turquoise | T-cell activation RhoGTPase activating protein(TAGAP)               | Homo sapiens |
| 1666 | 11727009_turquoise | aldehyde dehydrogenase 7 family member A1(ALDH7A1)                  | Homo sapiens |
| 1667 | 11727022_turquoise | transmembrane protein 64(TMEM64)                                    | Homo sapiens |
| 1668 | 11727044_turquoise | transmembrane protein 173(TMEM173)                                  | Homo sapiens |
| 1669 | 11727058_turquoise | mitochondrial ribosomal protein S36(MRPS36)                         | Homo sapiens |
| 1670 | 11727059_turquoise | mitochondrial ribosomal protein S36(MRPS36)                         | Homo sapiens |
| 1671 | 11727060_brown     | mitochondrial ribosomal protein S36(MRPS36)                         | Homo sapiens |
| 1672 | 11727062_turquoise | PIR-FIGF readthrough(PIR-FIGF)                                      | Homo sapiens |
| 1673 | 11727080_turquoise | NUFIP1, FMR1 interacting protein 1(NUFIP1)                          | Homo sapiens |
| 1674 | 11727092_turquoise | interleukin 18(IL18)                                                | Homo sapiens |
| 1675 | 11727111_turquoise | formin binding protein 1(FNBP1)                                     | Homo sapiens |
| 1676 | 11727112_turquoise | signaling threshold regulating transmembrane adaptor 1(SIT1)        | Homo sapiens |
| 1677 | 11727116_turquoise | phospholipase A1 member A(PLA1A)                                    | Homo sapiens |
| 1678 | 11727118_turquoise | complement factor properdin(CFP)                                    | Homo sapiens |
| 1679 | 11727120_turquoise | MYC binding protein 2, E3 ubiquitin protein ligase(MYCBP2)          | Homo sapiens |
| 1680 | 11727121_turquoise | MYC binding protein 2, E3 ubiquitin protein ligase(MYCBP2)          | Homo sapiens |
| 1681 | 11727141_turquoise | erythrocyte membrane protein band 4.1 like 3(EPB41L3)               | Homo sapiens |
| 1682 | 11727142_turquoise | erythrocyte membrane protein band 4.1 like 3(EPB41L3)               | Homo sapiens |
| 1683 | 11727143_turquoise | erythrocyte membrane protein band 4.1 like 3(EPB41L3)               | Homo sapiens |
| 1684 | 11727146_turquoise | G protein-coupled receptor 160(GPR160)                              | Homo sapiens |
| 1685 | 11727186_turquoise | Wnt family member 5A(WNT5A)                                         | Homo sapiens |
| 1686 | 11727210_turquoise | Purkinje cell protein 2(PCP2)                                       | Homo sapiens |
| 1687 | 11727219_turquoise | dermatan sulfate epimerase(DSE)                                     | Homo sapiens |
| 1688 | 11727224_turquoise | polypeptide N-acetylgalactosaminyltransferase 16(GALNT16)           | Homo sapiens |
| 1689 | 11727225_turquoise | polypeptide N-acetylgalactosaminyltransferase 16(GALNT16)           | Homo sapiens |
| 1690 | 11727254_turquoise | transmembrane protein 51(TMEM51)                                    | Homo sapiens |
| 1691 | 11727257_turquoise | Janus kinase 3(JAK3)                                                | Homo sapiens |
| 1692 | 11727291_turquoise | TEN1-CDK3 readthrough (NMD candidate)(TEN1-CDK3)                    | Homo sapiens |
| 1693 | 11727292_turquoise | chromosome 1 open reading frame 162(C1orf162)                       | Homo sapiens |
| 1694 | 11727321_turquoise | elastin microfibril interfacier 3(EMILIN3)                          | Homo sapiens |
| 1695 | 11727327_turquoise | family with sequence similarity 131 member C(FAM131C)               | Homo sapiens |
| 1696 | 11727360_turquoise | gap junction protein delta 3(GJD3)                                  | Homo sapiens |
| 1697 | 11727372_turquoise | 3'-phosphoadenosine 5'-phosphosulfate synthase 1(PAPSS1)            | Homo sapiens |
| 1698 | 11727373_turquoise | 3'-phosphoadenosine 5'-phosphosulfate synthase 1(PAPSS1)            | Homo sapiens |

|      |                    |                                                                 |              |
|------|--------------------|-----------------------------------------------------------------|--------------|
| 1699 | 11727404_grey      | glypican 4(GPC4)                                                | Homo sapiens |
| 1700 | 11727417_blue      | ATP5S like(ATP5SL)                                              | Homo sapiens |
| 1701 | 11727428_turquoise | G protein-coupled receptor 183(GPR183)                          | Homo sapiens |
| 1702 | 11727456_turquoise | OFD1, centriole and centriolar satellite protein(OFD1)          | Homo sapiens |
| 1703 | 11727467_turquoise | interleukin 10 receptor subunit beta(IL10RB)                    | Homo sapiens |
| 1704 | 11727478_turquoise | angiotensin II receptor associated protein(AGTRAP)              | Homo sapiens |
| 1705 | 11727489_turquoise | kinesin family member 11(KIF11)                                 | Homo sapiens |
| 1706 | 11727497_turquoise | zinc finger RANBP2-type containing 1(ZRANB1)                    | Homo sapiens |
| 1707 | 11727499_turquoise | zinc finger RANBP2-type containing 1(ZRANB1)                    | Homo sapiens |
| 1708 | 11727516_turquoise | ribonucleoprotein, PTB binding 2(RAVER2)                        | Homo sapiens |
| 1709 | 11727522_turquoise | zinc finger protein 267(ZNF267)                                 | Homo sapiens |
| 1710 | 11727523_turquoise | zinc finger protein 267(ZNF267)                                 | Homo sapiens |
| 1711 | 11727532_turquoise | fasciculation and elongation protein zeta 2(FEZ2)               | Homo sapiens |
| 1712 | 11727533_turquoise | fasciculation and elongation protein zeta 2(FEZ2)               | Homo sapiens |
| 1713 | 11727538_turquoise | NME/NM23 family member 5(NME5)                                  | Homo sapiens |
| 1714 | 11727539_turquoise | iron-sulfur cluster assembly enzyme(ISCU)                       | Homo sapiens |
| 1715 | 11727547_turquoise | RB binding protein 8, endonuclease(RBBP8)                       | Homo sapiens |
| 1716 | 11727561_turquoise | transcription factor 7 (T-cell specific, HMG-box)(TCF7)         | Homo sapiens |
| 1717 | 11727565_turquoise | tumor necrosis factor superfamily member 13b(TNFSF13B)          | Homo sapiens |
| 1718 | 11727572_turquoise | kelch like family member 6(KLHL6)                               | Homo sapiens |
| 1719 | 11727574_turquoise | retinol binding protein 5(RBP5)                                 | Homo sapiens |
| 1720 | 11727577_turquoise | transmembrane protein 237(TMEM237)                              | Homo sapiens |
| 1721 | 11727600_turquoise | TNF receptor superfamily member 4(TNFRSF4)                      | Homo sapiens |
| 1722 | 11727609_turquoise | killer cell lectin like receptor B1(KLRB1)                      | Homo sapiens |
| 1723 | 11727622_turquoise | vitrin(VIT)                                                     | Homo sapiens |
| 1724 | 11727643_turquoise | transcriptional regulating factor 1(TRERF1)                     | Homo sapiens |
| 1725 | 11727677_turquoise | biogenesis of lysosomal organelles complex 1 subunit 3(BLOC1S3) | Homo sapiens |
| 1726 | 11727694_turquoise | KLRC4-KLRK1 readthrough(KLRC4-KLRK1)                            | Homo sapiens |
| 1727 | 11727695_turquoise | KLRC4-KLRK1 readthrough(KLRC4-KLRK1)                            | Homo sapiens |
| 1728 | 11727701_turquoise | family with sequence similarity 185 member A(FAM185A)           | Homo sapiens |
| 1729 | 11727707_turquoise | microRNA 3191(MIR3191)                                          | Homo sapiens |
| 1730 | 11727740_turquoise | CD300 molecule like family member f(CD300LF)                    | Homo sapiens |
| 1731 | 11727775_turquoise | G protein subunit alpha i3(GNAI3)                               | Homo sapiens |
| 1732 | 11727776_turquoise | G protein subunit alpha i3(GNAI3)                               | Homo sapiens |
| 1733 | 11727778_turquoise | G protein subunit alpha i3(GNAI3)                               | Homo sapiens |
| 1734 | 11727779_turquoise | growth hormone inducible transmembrane protein(GHITM)           | Homo sapiens |
| 1735 | 11727782_turquoise | tropomyosin 4(TPM4)                                             | Homo sapiens |
| 1736 | 11727783_turquoise | tropomyosin 4(TPM4)                                             | Homo sapiens |
| 1737 | 11727791_blue      | dihydrolipoamide S-acetyltransferase(DLAT)                      | Homo sapiens |
| 1738 | 11727792_blue      | dihydrolipoamide S-acetyltransferase(DLAT)                      | Homo sapiens |
| 1739 | 11727793_blue      | dihydrolipoamide S-acetyltransferase(DLAT)                      | Homo sapiens |
| 1740 | 11727797_turquoise | Nedd4 family interacting protein 2(NDFIP2)                      | Homo sapiens |
| 1741 | 11727816_turquoise | ubiquitin associated and SH3 domain containing B(UBASH3B)       | Homo sapiens |
| 1742 | 11727817_turquoise | ubiquitin associated and SH3 domain containing B(UBASH3B)       | Homo sapiens |
| 1743 | 11727820_brown     | CDGSH iron sulfur domain 1(CISD1)                               | Homo sapiens |
| 1744 | 11727821_turquoise | CDGSH iron sulfur domain 1(CISD1)                               | Homo sapiens |
| 1745 | 11727835_turquoise | Enah/Vasp-like(EVL)                                             | Homo sapiens |
| 1746 | 11727841_turquoise | protein kinase C delta(PRKCD)                                   | Homo sapiens |
| 1747 | 11727853_turquoise | nucleoporin 50(NUP50)                                           | Homo sapiens |
| 1748 | 11727854_turquoise | nucleoporin 50(NUP50)                                           | Homo sapiens |

|      |                    |                                                                    |              |
|------|--------------------|--------------------------------------------------------------------|--------------|
| 1749 | 11727855_turquoise | nucleoporin 50(NUP50)                                              | Homo sapiens |
| 1750 | 11727856_turquoise | nucleoporin 50(NUP50)                                              | Homo sapiens |
| 1751 | 11727876_turquoise | cytochrome b-245 beta chain(CYBB)                                  | Homo sapiens |
| 1752 | 11727877_turquoise | MIA-RAB4B readthrough (NMD candidate)(MIA-RAB4B)                   | Homo sapiens |
| 1753 | 11727891_turquoise | proline and arginine rich end leucine rich repeat protein(PRELP)   | Homo sapiens |
| 1754 | 11727892_turquoise | proline and arginine rich end leucine rich repeat protein(PRELP)   | Homo sapiens |
| 1755 | 11727894_turquoise | G kinase anchoring protein 1(GKAP1)                                | Homo sapiens |
| 1756 | 11727904_turquoise | interleukin 13 receptor subunit alpha 1(IL13RA1)                   | Homo sapiens |
| 1757 | 11727905_turquoise | interleukin 13 receptor subunit alpha 1(IL13RA1)                   | Homo sapiens |
| 1758 | 11727913_turquoise | formin like 1(FMNL1)                                               | Homo sapiens |
| 1759 | 11727920_turquoise | osteoclast stimulating factor 1(OSTF1)                             | Homo sapiens |
| 1760 | 11727930_turquoise | ATPase plasma membrane Ca <sup>2+</sup> transporting 1(ATP2B1)     | Homo sapiens |
| 1761 | 11727936_turquoise | SLC9A3 regulator 1(SLC9A3R1)                                       | Homo sapiens |
| 1762 | 11727942_turquoise | formyl peptide receptor 3(FPR3)                                    | Homo sapiens |
| 1763 | 11727943_turquoise | formyl peptide receptor 3(FPR3)                                    | Homo sapiens |
| 1764 | 11727970_turquoise | solute carrier family 14 member 1 (Kidd blood group)(SLC14A1)      | Homo sapiens |
| 1765 | 11727992_turquoise | syntaxin 11(STX11)                                                 | Homo sapiens |
| 1766 | 11727994_turquoise | syntaxin 11(STX11)                                                 | Homo sapiens |
| 1767 | 11728003_blue      | chromosome 4 open reading frame 48(C4orf48)                        | Homo sapiens |
| 1768 | 11728021_brown     | coiled-coil-helix-coiled-coil-helix domain containing 4(CHCHD4)    | Homo sapiens |
| 1769 | 11728027_brown     | coiled-coil domain containing 58(CCDC58)                           | Homo sapiens |
| 1770 | 11728033_turquoise | SFT2 domain containing 2(SFT2D2)                                   | Homo sapiens |
| 1771 | 11728038_turquoise | C-C motif chemokine ligand 8(CCL8)                                 | Homo sapiens |
| 1772 | 11728039_turquoise | C-C motif chemokine ligand 8(CCL8)                                 | Homo sapiens |
| 1773 | 11728040_brown     | peroxiredoxin 5(PRX5)                                              | Homo sapiens |
| 1774 | 11728055_turquoise | growth hormone receptor(GHR)                                       | Homo sapiens |
| 1775 | 11728056_turquoise | caspase 10(CASP10)                                                 | Homo sapiens |
| 1776 | 11728062_turquoise | SH3 domain binding protein 1(SH3BP1)                               | Homo sapiens |
| 1777 | 11728063_turquoise | SH3 domain binding protein 1(SH3BP1)                               | Homo sapiens |
| 1778 | 11728077_turquoise | protein kinase C theta(PRKCQ)                                      | Homo sapiens |
| 1779 | 11728093_turquoise | mitogen-activated protein kinase kinase kinase 1(MAP3K1)           | Homo sapiens |
| 1780 | 11728094_turquoise | mitogen-activated protein kinase kinase kinase 1(MAP3K1)           | Homo sapiens |
| 1781 | 11728125_turquoise | granzyme H(GZMH)                                                   | Homo sapiens |
| 1782 | 11728137_turquoise | X-linked Kx blood group(XK)                                        | Homo sapiens |
| 1783 | 11728146_turquoise | aquaporin 11(AQP11)                                                | Homo sapiens |
| 1784 | 11728152_brown     | histone cluster 1 H2B family member d(HIST1H2BD)                   | Homo sapiens |
| 1785 | 11728154_turquoise | fucosyltransferase 4(FUT4)                                         | Homo sapiens |
| 1786 | 11728157_turquoise | ectodysplasin A(EDA)                                               | Homo sapiens |
| 1787 | 11728178_turquoise | sirtuin 4(SIRT4)                                                   | Homo sapiens |
| 1788 | 11728189_turquoise | C-X-C motif chemokine receptor 4(CXCR4)                            | Homo sapiens |
| 1789 | 11728190_turquoise | C-X-C motif chemokine receptor 4(CXCR4)                            | Homo sapiens |
| 1790 | 11728191_turquoise | C-X-C motif chemokine receptor 4(CXCR4)                            | Homo sapiens |
| 1791 | 11728207_turquoise | XPC complex subunit, DNA damage recognition and repair factor(XPC) | Homo sapiens |
| 1792 | 11728223_turquoise | ubiquitin conjugating enzyme E2 J1(UBE2J1)                         | Homo sapiens |
| 1793 | 11728224_turquoise | ubiquitin conjugating enzyme E2 J1(UBE2J1)                         | Homo sapiens |
| 1794 | 11728225_turquoise | ubiquitin conjugating enzyme E2 J1(UBE2J1)                         | Homo sapiens |
| 1795 | 11728228_turquoise | hepatitis A virus cellular receptor 2(HAVCR2)                      | Homo sapiens |
| 1796 | 11728229_turquoise | hepatitis A virus cellular receptor 2(HAVCR2)                      | Homo sapiens |
| 1797 | 11728236_turquoise | CD5 molecule(CD5)                                                  | Homo sapiens |
| 1798 | 11728245_turquoise | angiopoietin 2(ANGPT2)                                             | Homo sapiens |

|      |                    |                                                                                  |              |
|------|--------------------|----------------------------------------------------------------------------------|--------------|
| 1799 | 11728265_turquoise | leukocyte immunoglobulin like receptor B2(LILRB2)                                | Homo sapiens |
| 1800 | 11728266_turquoise | leukocyte immunoglobulin like receptor B2(LILRB2)                                | Homo sapiens |
| 1801 | 11728267_turquoise | leukocyte immunoglobulin like receptor B2(LILRB2)                                | Homo sapiens |
| 1802 | 11728276_turquoise | phospholipase A2 group XIIA(PLA2G12A)                                            | Homo sapiens |
| 1803 | 11728277_turquoise | phospholipase A2 group XIIA(PLA2G12A)                                            | Homo sapiens |
| 1804 | 11728278_turquoise | phospholipase A2 group XIIA(PLA2G12A)                                            | Homo sapiens |
| 1805 | 11728279_turquoise | phospholipase A2 group XIIA(PLA2G12A)                                            | Homo sapiens |
| 1806 | 11728291_turquoise | SH2 domain containing 1A(SH2D1A)                                                 | Homo sapiens |
| 1807 | 11728292_turquoise | SH2 domain containing 1A(SH2D1A)                                                 | Homo sapiens |
| 1808 | 11728294_brown     | mitochondrial ribosomal protein L58(MRPL58)                                      | Homo sapiens |
| 1809 | 11728311_brown     | ERCC excision repair 1, endonuclease non-catalytic subunit(ERCC1)                | Homo sapiens |
| 1810 | 11728317_brown     | family with sequence similarity 122A(FAM122A)                                    | Homo sapiens |
| 1811 | 11728347_turquoise | ABI family member 3(ABI3)                                                        | Homo sapiens |
| 1812 | 11728350_turquoise | stromal interaction molecule 2(STIM2)                                            | Homo sapiens |
| 1813 | 11728373_turquoise | ERG, ETS transcription factor(ERG)                                               | Homo sapiens |
| 1814 | 11728374_turquoise | actinin alpha 1(ACTN1)                                                           | Homo sapiens |
| 1815 | 11728375_turquoise | actinin alpha 1(ACTN1)                                                           | Homo sapiens |
| 1816 | 11728378_turquoise | embryonic ectoderm development(EED)                                              | Homo sapiens |
| 1817 | 11728392_blue      | LDL receptor related protein 12(LRP12)                                           | Homo sapiens |
| 1818 | 11728396_turquoise | sorting nexin 14(SNX14)                                                          | Homo sapiens |
| 1819 | 11728401_turquoise | ATPase H+ transporting V0 subunit a2(ATP6V0A2)                                   | Homo sapiens |
| 1820 | 11728405_turquoise | negative regulator of reactive oxygen species(NRROS)                             | Homo sapiens |
| 1821 | 11728413_turquoise | serpin family B member 8(SERPINB8)                                               | Homo sapiens |
| 1822 | 11728421_turquoise | phospholipase A2 group VII(PLA2G7)                                               | Homo sapiens |
| 1823 | 11728423_turquoise | paired immunoglobulin like type 2 receptor alpha(PILRA)                          | Homo sapiens |
| 1824 | 11728424_turquoise | paired immunoglobulin like type 2 receptor alpha(PILRA)                          | Homo sapiens |
| 1825 | 11728425_brown     | boLA family member 3(BOLA3)                                                      | Homo sapiens |
| 1826 | 11728430_turquoise | hes related family bHLH transcription factor with YRPW motif 2(HEY2)             | Homo sapiens |
| 1827 | 11728446_turquoise | phospholipase C eta 1(PLCH1)                                                     | Homo sapiens |
| 1828 | 11728489_turquoise | C-type lectin domain family 4 member A(CLEC4A)                                   | Homo sapiens |
| 1829 | 11728503_turquoise | CD300c molecule(CD300C)                                                          | Homo sapiens |
| 1830 | 11728507_turquoise | lymphocyte antigen 96(LY96)                                                      | Homo sapiens |
| 1831 | 11728512_turquoise | TNF receptor associated factor 5(TRAF5)                                          | Homo sapiens |
| 1832 | 11728513_brown     | NADH:ubiquinone oxidoreductase complex assembly factor 6(NDUFAF6)                | Homo sapiens |
| 1833 | 11728514_turquoise | NADH:ubiquinone oxidoreductase complex assembly factor 6(NDUFAF6)                | Homo sapiens |
| 1834 | 11728515_turquoise | SP140 nuclear body protein(SP140)                                                | Homo sapiens |
| 1835 | 11728523_turquoise | v-myc avian myelocytomatosis viral oncogene lung carcinoma derived homolog(MYCL) | Homo sapiens |
| 1836 | 11728530_turquoise | B-cell linker(BLNK)                                                              | Homo sapiens |
| 1837 | 11728543_turquoise | maestro(MRO)                                                                     | Homo sapiens |
| 1838 | 11728560_turquoise | granzyme K(GZMK)                                                                 | Homo sapiens |
| 1839 | 11728565_turquoise | family with sequence similarity 210 member A(FAM210A)                            | Homo sapiens |
| 1840 | 11728566_blue      | family with sequence similarity 210 member A(FAM210A)                            | Homo sapiens |
| 1841 | 11728570_turquoise | zinc finger protein, FOG family member 2(ZFPM2)                                  | Homo sapiens |
| 1842 | 11728592_turquoise | leucine rich repeat containing 70(LRRC70)                                        | Homo sapiens |
| 1843 | 11728595_turquoise | caveolin 3(CAV3)                                                                 | Homo sapiens |
| 1844 | 11728617_turquoise | caspase recruitment domain family member 6(CARD6)                                | Homo sapiens |
| 1845 | 11728640_turquoise | EDAR associated death domain(EDARADD)                                            | Homo sapiens |
| 1846 | 11728643_turquoise | ARP3 actin related protein 3 homolog(ACTR3)                                      | Homo sapiens |
| 1847 | 11728673_brown     | kinesin family member 22(KIF22)                                                  | Homo sapiens |
| 1848 | 11728676_turquoise | mediator complex subunit 14(MED14)                                               | Homo sapiens |

|      |                    |                                                                               |              |
|------|--------------------|-------------------------------------------------------------------------------|--------------|
| 1849 | 11728679_turquoise | CD163 molecule(CD163)                                                         | Homo sapiens |
| 1850 | 11728680_turquoise | poly(A) binding protein interacting protein 1(PAIP1)                          | Homo sapiens |
| 1851 | 11728702_turquoise | KIAA0232(KIAA0232)                                                            | Homo sapiens |
| 1852 | 11728706_turquoise | epithelial membrane protein 2(EMP2)                                           | Homo sapiens |
| 1853 | 11728711_turquoise | nuclear factor of activated T-cells 2 interacting protein(NFATC2IP)           | Homo sapiens |
| 1854 | 11728720_turquoise | ras homolog family member H(RHOH)                                             | Homo sapiens |
| 1855 | 11728741_brown     | coenzyme Q3, methyltransferase(COQ3)                                          | Homo sapiens |
| 1856 | 11728749_turquoise | transcription factor 19(TCF19)                                                | Homo sapiens |
| 1857 | 11728761_turquoise | uncharacterized LOC100506403(LOC100506403)                                    | Homo sapiens |
| 1858 | 11728766_turquoise | kelch like family member 5(KLHL5)                                             | Homo sapiens |
| 1859 | 11728767_turquoise | kelch like family member 5(KLHL5)                                             | Homo sapiens |
| 1860 | 11728768_turquoise | kelch like family member 5(KLHL5)                                             | Homo sapiens |
| 1861 | 11728776_turquoise | vitamin D (1,25- dihydroxyvitamin D3) receptor(VDR)                           | Homo sapiens |
| 1862 | 11728780_turquoise | zeta chain of T cell receptor associated protein kinase 70(ZAP70)             | Homo sapiens |
| 1863 | 11728781_turquoise | CD1c molecule(CD1C)                                                           | Homo sapiens |
| 1864 | 11728810_turquoise | enoyl-CoA hydratase domain containing 3(ECHDC3)                               | Homo sapiens |
| 1865 | 11728811_turquoise | OTU deubiquitinase 7B(OTUD7B)                                                 | Homo sapiens |
| 1866 | 11728823_blue      | solute carrier family 25 member 3(SLC25A3)                                    | Homo sapiens |
| 1867 | 11728824_blue      | solute carrier family 25 member 3(SLC25A3)                                    | Homo sapiens |
| 1868 | 11728841_blue      | pleckstrin homology domain containing A5(PLEKHA5)                             | Homo sapiens |
| 1869 | 11728846_turquoise | heart and neural crest derivatives expressed 1(HAND1)                         | Homo sapiens |
| 1870 | 11728852_turquoise | tubby bipartite transcription factor(TUB)                                     | Homo sapiens |
| 1871 | 11728863_turquoise | GINS complex subunit 1(GINS1)                                                 | Homo sapiens |
| 1872 | 11728892_turquoise | tubulin polymerization promoting protein(TPPP)                                | Homo sapiens |
| 1873 | 11728901_turquoise | dual adaptor of phosphotyrosine and 3-phosphoinositides 1(DAPP1)              | Homo sapiens |
| 1874 | 11728920_turquoise | RAS guanyl releasing protein 1(RASGRP1)                                       | Homo sapiens |
| 1875 | 11728926_turquoise | NFAT activating protein with ITAM motif 1(NFAM1)                              | Homo sapiens |
| 1876 | 11728937_turquoise | GDNF family receptor alpha 2(GFRA2)                                           | Homo sapiens |
| 1877 | 11728944_turquoise | leukocyte specific transcript 1(LST1)                                         | Homo sapiens |
| 1878 | 11728945_turquoise | leukocyte specific transcript 1(LST1)                                         | Homo sapiens |
| 1879 | 11728961_turquoise | TSNAX-DISC1 readthrough (NMD candidate)(TSNAX-DISC1)                          | Homo sapiens |
| 1880 | 11728978_turquoise | caspase 8(CASP8)                                                              | Homo sapiens |
| 1881 | 11728984_turquoise | monofunctional C1-tetrahydrofolate synthase, mitochondrial-like(LOC100996643) | Homo sapiens |
| 1882 | 11728985_turquoise | monofunctional C1-tetrahydrofolate synthase, mitochondrial-like(LOC100996643) | Homo sapiens |
| 1883 | 11728986_turquoise | monofunctional C1-tetrahydrofolate synthase, mitochondrial-like(LOC100996643) | Homo sapiens |
| 1884 | 11729000_turquoise | CD84 molecule(CD84)                                                           | Homo sapiens |
| 1885 | 11729023_turquoise | potassium voltage-gated channel subfamily A member 5(KCNA5)                   | Homo sapiens |
| 1886 | 11729033_turquoise | inositol 1,4,5-trisphosphate receptor interacting protein like 2(ITPRIPL2)    | Homo sapiens |
| 1887 | 11729035_turquoise | inositol 1,4,5-trisphosphate receptor interacting protein like 2(ITPRIPL2)    | Homo sapiens |
| 1888 | 11729074_turquoise | hydroxylysine kinase(HYKK)                                                    | Homo sapiens |
| 1889 | 11729101_turquoise | aldo-keto reductase family 1 member C2(AKR1C2)                                | Homo sapiens |
| 1890 | 11729110_turquoise | ADAM like decysin 1(ADAMDEC1)                                                 | Homo sapiens |
| 1891 | 11729111_turquoise | ADAM like decysin 1(ADAMDEC1)                                                 | Homo sapiens |
| 1892 | 11729121_brown     | McKusick-Kaufman syndrome(MKKS)                                               | Homo sapiens |
| 1893 | 11729122_brown     | McKusick-Kaufman syndrome(MKKS)                                               | Homo sapiens |
| 1894 | 11729126_blue      | solute carrier family 25 member 3(SLC25A3)                                    | Homo sapiens |
| 1895 | 11729127_blue      | solute carrier family 25 member 3(SLC25A3)                                    | Homo sapiens |
| 1896 | 11729131_brown     | proteasome activator subunit 3(PSME3)                                         | Homo sapiens |
| 1897 | 11729138_turquoise | SLAM family member 7(SLAMF7)                                                  | Homo sapiens |
| 1898 | 11729139_turquoise | SLAM family member 7(SLAMF7)                                                  | Homo sapiens |



|      |                    |                                                                                   |              |
|------|--------------------|-----------------------------------------------------------------------------------|--------------|
| 1899 | 11729140_turquoise | SLAM family member 7(SLAMF7)                                                      | Homo sapiens |
| 1900 | 11729149_brown     | mitochondrial ribosomal protein S23(MRPS23)                                       | Homo sapiens |
| 1901 | 11729163_turquoise | BTG anti-proliferation factor 3(BTG3)                                             | Homo sapiens |
| 1902 | 11729191_turquoise | MYC associated factor X(MAX)                                                      | Homo sapiens |
| 1903 | 11729202_turquoise | Kazal type serine peptidase inhibitor domain 1(KAZALD1)                           | Homo sapiens |
| 1904 | 11729203_turquoise | plexin D1(PLXND1)                                                                 | Homo sapiens |
| 1905 | 11729219_turquoise | NCK adaptor protein 1(NCK1)                                                       | Homo sapiens |
| 1906 | 11729220_turquoise | carboxymethylenebutenolidase homolog(CMBL)                                        | Homo sapiens |
| 1907 | 11729222_turquoise | GATA binding protein 3(GATA3)                                                     | Homo sapiens |
| 1908 | 11729223_turquoise | GATA binding protein 3(GATA3)                                                     | Homo sapiens |
| 1909 | 11729226_turquoise | integrin subunit alpha L(ITGAL)                                                   | Homo sapiens |
| 1910 | 11729237_blue      | methylcrotonoyl-CoA carboxylase 2(MCCC2)                                          | Homo sapiens |
| 1911 | 11729247_turquoise | sirtuin 5(SIRT5)                                                                  | Homo sapiens |
| 1912 | 11729251_turquoise | myeloid cell nuclear differentiation antigen(MNDA)                                | Homo sapiens |
| 1913 | 11729263_turquoise | serpin family B member 9(SERPINB9)                                                | Homo sapiens |
| 1914 | 11729272_turquoise | ankyrin repeat and SOCS box containing 1(ASB1)                                    | Homo sapiens |
| 1915 | 11729274_turquoise | guanylate binding protein 5(GBP5)                                                 | Homo sapiens |
| 1916 | 11729311_brown     | spexin hormone(SPX)                                                               | Homo sapiens |
| 1917 | 11729312_blue      | nicotinamide nucleotide adenyltransferase 1(NMNAT1)                               | Homo sapiens |
| 1918 | 11729338_turquoise | proline-serine-threonine phosphatase interacting protein 2(PSTPIP2)               | Homo sapiens |
| 1919 | 11729357_turquoise | poly(A) RNA polymerase D4, non-canonical(PAPD4)                                   | Homo sapiens |
| 1920 | 11729410_turquoise | zinc finger protein 415(ZNF415)                                                   | Homo sapiens |
| 1921 | 11729419_turquoise | ATPase sarcoplasmic/endoplasmic reticulum Ca <sup>2+</sup> transporting 3(ATP2A3) | Homo sapiens |
| 1922 | 11729422_brown     | popeye domain containing 3(POPDC3)                                                | Homo sapiens |
| 1923 | 11729424_turquoise | C-C motif chemokine receptor like 2(CCRL2)                                        | Homo sapiens |
| 1924 | 11729431_turquoise | phosphatase domain containing, paladin 1(PALD1)                                   | Homo sapiens |
| 1925 | 11729442_turquoise | TEPSIN, adaptor related protein complex 4 accessory protein(TEPSIN)               | Homo sapiens |
| 1926 | 11729443_turquoise | promyelocytic leukemia(PML)                                                       | Homo sapiens |
| 1927 | 11729449_turquoise | TERF1 interacting nuclear factor 2(TINF2)                                         | Homo sapiens |
| 1928 | 11729458_turquoise | Fanconi anemia complementation group I(FANCI)                                     | Homo sapiens |
| 1929 | 11729479_turquoise | C-type lectin domain family 12 member A(CLEC12A)                                  | Homo sapiens |
| 1930 | 11729481_turquoise | guanylate kinase 1(GUK1)                                                          | Homo sapiens |
| 1931 | 11729485_turquoise | regulator of G-protein signaling 6(RGS6)                                          | Homo sapiens |
| 1932 | 11729487_turquoise | regulator of G-protein signaling 6(RGS6)                                          | Homo sapiens |
| 1933 | 11729520_turquoise | chromosome X open reading frame 65(CXorf65)                                       | Homo sapiens |
| 1934 | 11729523_turquoise | NLR family CARD domain containing 5(NLRC5)                                        | Homo sapiens |
| 1935 | 11729542_turquoise | calcium/calmodulin dependent protein kinase kinase 2(CAMKK2)                      | Homo sapiens |
| 1936 | 11729570_turquoise | mitogen-activated protein kinase kinase kinase 1(MAP4K1)                          | Homo sapiens |
| 1937 | 11729574_turquoise | ectodermal-neural cortex 1(ENC1)                                                  | Homo sapiens |
| 1938 | 11729603_turquoise | minichromosome maintenance complex component 7(MCM7)                              | Homo sapiens |
| 1939 | 11729610_turquoise | engulfment and cell motility 1(ELMO1)                                             | Homo sapiens |
| 1940 | 11729611_turquoise | actin related protein 2/3 complex subunit 4(ARPC4)                                | Homo sapiens |
| 1941 | 11729619_turquoise | chloride voltage-gated channel 4(CLCN4)                                           | Homo sapiens |
| 1942 | 11729620_turquoise | chloride voltage-gated channel 4(CLCN4)                                           | Homo sapiens |
| 1943 | 11729621_blue      | chloride voltage-gated channel 4(CLCN4)                                           | Homo sapiens |
| 1944 | 11729622_turquoise | chloride voltage-gated channel 4(CLCN4)                                           | Homo sapiens |
| 1945 | 11729649_turquoise | perforin 1(PRF1)                                                                  | Homo sapiens |
| 1946 | 11729657_turquoise | SP110 nuclear body protein(SP110)                                                 | Homo sapiens |
| 1947 | 11729658_turquoise | SP110 nuclear body protein(SP110)                                                 | Homo sapiens |
| 1948 | 11729659_blue      | transmembrane protein 69(TMEM69)                                                  | Homo sapiens |

|      |           |           |                                                                             |              |
|------|-----------|-----------|-----------------------------------------------------------------------------|--------------|
| 1949 | 11729667_ | turquoise | nucleolar protein 3(NOL3)                                                   | Homo sapiens |
| 1950 | 11729669_ | brown     | eukaryotic translation initiation factor 3 subunit K(EIF3K)                 | Homo sapiens |
| 1951 | 11729676_ | turquoise | cyclin dependent kinase 17(CDK17)                                           | Homo sapiens |
| 1952 | 11729687_ | turquoise | LYR motif containing 7(LYRM7)                                               | Homo sapiens |
| 1953 | 11729689_ | turquoise | LYR motif containing 7(LYRM7)                                               | Homo sapiens |
| 1954 | 11729721_ | turquoise | leukocyte immunoglobulin like receptor B3(LILRB3)                           | Homo sapiens |
| 1955 | 11729741_ | turquoise | CD68 molecule(CD68)                                                         | Homo sapiens |
| 1956 | 11729747_ | turquoise | interleukin 10 receptor subunit alpha(IL10RA)                               | Homo sapiens |
| 1957 | 11729752_ | turquoise | epidermal growth factor receptor pathway substrate 15 like 1(EPS15L1)       | Homo sapiens |
| 1958 | 11729754_ | turquoise | unc-51 like autophagy activating kinase 2(ULK2)                             | Homo sapiens |
| 1959 | 11729758_ | turquoise | regulator of G-protein signaling 18(RGS18)                                  | Homo sapiens |
| 1960 | 11729759_ | turquoise | regulator of G-protein signaling 18(RGS18)                                  | Homo sapiens |
| 1961 | 11729769_ | turquoise | CD38 molecule(CD38)                                                         | Homo sapiens |
| 1962 | 11729807_ | brown     | cytochrome c oxidase subunit 6B1(COX6B1)                                    | Homo sapiens |
| 1963 | 11729821_ | turquoise | interleukin 27 receptor subunit alpha(IL27RA)                               | Homo sapiens |
| 1964 | 11729851_ | turquoise | Rap associating with DIL domain(RADIL)                                      | Homo sapiens |
| 1965 | 11729855_ | turquoise | CD3e molecule(CD3E)                                                         | Homo sapiens |
| 1966 | 11729886_ | turquoise | chromosome 18 open reading frame 54(C18orf54)                               | Homo sapiens |
| 1967 | 11729889_ | turquoise | ZFP3 zinc finger protein(ZFP3)                                              | Homo sapiens |
| 1968 | 11729924_ | turquoise | tet methylcytosine dioxygenase 3(TET3)                                      | Homo sapiens |
| 1969 | 11729954_ | turquoise | fragile histidine triad(FHIT)                                               | Homo sapiens |
| 1970 | 11729955_ | turquoise | fragile histidine triad(FHIT)                                               | Homo sapiens |
| 1971 | 11729976_ | turquoise | protein tyrosine phosphatase, receptor type N2(PTPRN2)                      | Homo sapiens |
| 1972 | 11729977_ | turquoise | C-X-C motif chemokine receptor 6(CXCR6)                                     | Homo sapiens |
| 1973 | 11729980_ | turquoise | phosphatidylinositol specific phospholipase C X domain containing 3(PLCXD3) | Homo sapiens |
| 1974 | 11729981_ | turquoise | poly(ADP-ribose) polymerase family member 11(PARP11)                        | Homo sapiens |
| 1975 | 11729996_ | turquoise | schlafen family member 12(SLFN12)                                           | Homo sapiens |
| 1976 | 11730005_ | turquoise | semaphorin 4D(SEMA4D)                                                       | Homo sapiens |
| 1977 | 11730010_ | blue      | microtubule associated tumor suppressor candidate 2(MTUS2)                  | Homo sapiens |
| 1978 | 11730044_ | brown     | chromosome 9 open reading frame 24(C9orf24)                                 | Homo sapiens |
| 1979 | 11730060_ | turquoise | lymphocyte activating 3(LAG3)                                               | Homo sapiens |
| 1980 | 11730067_ | turquoise | granzyme M(GZMM)                                                            | Homo sapiens |
| 1981 | 11730090_ | turquoise | TNFSF12-TNFSF13 readthrough(TNFSF12-TNFSF13)                                | Homo sapiens |
| 1982 | 11730096_ | turquoise | BCL2 related protein A1(BCL2A1)                                             | Homo sapiens |
| 1983 | 11730099_ | turquoise | fms related tyrosine kinase 3 ligand(FLT3LG)                                | Homo sapiens |
| 1984 | 11730100_ | turquoise | fms related tyrosine kinase 3 ligand(FLT3LG)                                | Homo sapiens |
| 1985 | 11730109_ | turquoise | NLR family CARD domain containing 3(NLRC3)                                  | Homo sapiens |
| 1986 | 11730145_ | turquoise | kelch like family member 31(KLHL31)                                         | Homo sapiens |
| 1987 | 11730146_ | blue      | kelch like family member 31(KLHL31)                                         | Homo sapiens |
| 1988 | 11730148_ | turquoise | adhesion G protein-coupled receptor G5(ADGRG5)                              | Homo sapiens |
| 1989 | 11730155_ | turquoise | sarcoglycan delta(SGCD)                                                     | Homo sapiens |
| 1990 | 11730159_ | blue      | RNA binding motif protein 20(RBM20)                                         | Homo sapiens |
| 1991 | 11730168_ | turquoise | lipopolysaccharide induced TNF factor(LITAF)                                | Homo sapiens |
| 1992 | 11730186_ | brown     | isocitrate dehydrogenase 3 (NAD(+)) beta(IDH3B)                             | Homo sapiens |
| 1993 | 11730190_ | turquoise | Obg like ATPase 1(OLA1)                                                     | Homo sapiens |
| 1994 | 11730191_ | turquoise | SEC14 like lipid binding 2(SEC14L2)                                         | Homo sapiens |
| 1995 | 11730207_ | turquoise | ArfGAP with RhoGAP domain, ankyrin repeat and PH domain 2(ARAP2)            | Homo sapiens |
| 1996 | 11730212_ | blue      | mitochondrial ribosomal protein S7(MRPS7)                                   | Homo sapiens |
| 1997 | 11730213_ | blue      | mitochondrial ribosomal protein S7(MRPS7)                                   | Homo sapiens |
| 1998 | 11730217_ | turquoise | ceramide synthase 5(CERS5)                                                  | Homo sapiens |

|      |                    |                                                                     |              |
|------|--------------------|---------------------------------------------------------------------|--------------|
| 1999 | 11730218_turquoise | ceramide synthase 5(CERS5)                                          | Homo sapiens |
| 2000 | 11730231_turquoise | TIA1 cytotoxic granule associated RNA binding protein like 1(TIAL1) | Homo sapiens |
| 2001 | 11730237_turquoise | abhydrolase domain containing 10(ABHD10)                            | Homo sapiens |
| 2002 | 11730244_turquoise | flavin containing monooxygenase 2(FMO2)                             | Homo sapiens |
| 2003 | 11730247_turquoise | stromal antigen 3(STAG3)                                            | Homo sapiens |
| 2004 | 11730250_turquoise | ligand of numb-protein X 1(LNX1)                                    | Homo sapiens |
| 2005 | 11730251_turquoise | ligand of numb-protein X 1(LNX1)                                    | Homo sapiens |
| 2006 | 11730254_turquoise | ELK3, ETS transcription factor(ELK3)                                | Homo sapiens |
| 2007 | 11730259_turquoise | zinc finger C2HC-type containing 1C(ZC2HC1C)                        | Homo sapiens |
| 2008 | 11730269_turquoise | NIPBL, cohesin loading factor(NIPBL)                                | Homo sapiens |
| 2009 | 11730274_turquoise | calcitonin receptor like receptor(CALCRL)                           | Homo sapiens |
| 2010 | 11730296_turquoise | toll like receptor 3(TLR3)                                          | Homo sapiens |
| 2011 | 11730301_turquoise | lipoic acid synthetase(LIAS)                                        | Homo sapiens |
| 2012 | 11730322_turquoise | C-type lectin domain family 2 member D(CLEC2D)                      | Homo sapiens |
| 2013 | 11730342_turquoise | Src like adaptor 2(SLA2)                                            | Homo sapiens |
| 2014 | 11730372_turquoise | FYN binding protein(FYB)                                            | Homo sapiens |
| 2015 | 11730373_turquoise | FYN binding protein(FYB)                                            | Homo sapiens |
| 2016 | 11730374_turquoise | FYN binding protein(FYB)                                            | Homo sapiens |
| 2017 | 11730399_turquoise | AT-rich interaction domain 3A(ARID3A)                               | Homo sapiens |
| 2018 | 11730403_turquoise | MRE11 homolog, double strand break repair nuclease(MRE11)           | Homo sapiens |
| 2019 | 11730424_turquoise | APC down-regulated 1 like(APCDD1L)                                  | Homo sapiens |
| 2020 | 11730428_turquoise | adaptor related protein complex 1 beta 1 subunit(AP1B1)             | Homo sapiens |
| 2021 | 11730451_brown     | succinate dehydrogenase complex assembly factor 4(SDHAF4)           | Homo sapiens |
| 2022 | 11730457_turquoise | absent in melanoma 2(AIM2)                                          | Homo sapiens |
| 2023 | 11730458_turquoise | absent in melanoma 2(AIM2)                                          | Homo sapiens |
| 2024 | 11730469_turquoise | LIM domain only 2(LMO2)                                             | Homo sapiens |
| 2025 | 11730478_turquoise | ring finger protein 125(RNF125)                                     | Homo sapiens |
| 2026 | 11730542_blue      | acetyl-CoA acyltransferase 1(ACAA1)                                 | Homo sapiens |
| 2027 | 11730555_turquoise | TRIM6-TRIM34 readthrough(TRIM6-TRIM34)                              | Homo sapiens |
| 2028 | 11730556_turquoise | TRIM6-TRIM34 readthrough(TRIM6-TRIM34)                              | Homo sapiens |
| 2029 | 11730600_turquoise | putative aquaporin-7-like protein 3(LOC100509620)                   | Homo sapiens |
| 2030 | 11730611_turquoise | mucoilin 2(MCOLN2)                                                  | Homo sapiens |
| 2031 | 11730637_turquoise | cytotoxic T-lymphocyte associated protein 4(CTLA4)                  | Homo sapiens |
| 2032 | 11730659_brown     | 3-oxoacyl-ACP synthase, mitochondrial(OXSM)                         | Homo sapiens |
| 2033 | 11730690_turquoise | family with sequence similarity 111 member A(FAM111A)               | Homo sapiens |
| 2034 | 11730729_turquoise | transporter 1, ATP binding cassette subfamily B member(TAP1)        | Homo sapiens |
| 2035 | 11730752_turquoise | 1-acylglycerol-3-phosphate O-acyltransferase 5(AGPAT5)              | Homo sapiens |
| 2036 | 11730754_turquoise | 1-acylglycerol-3-phosphate O-acyltransferase 5(AGPAT5)              | Homo sapiens |
| 2037 | 11730779_turquoise | alcohol dehydrogenase 1C (class I), gamma polypeptide(ADH1C)        | Homo sapiens |
| 2038 | 11730780_turquoise | alcohol dehydrogenase 1C (class I), gamma polypeptide(ADH1C)        | Homo sapiens |
| 2039 | 11730782_turquoise | solute carrier family 2 member 6(SLC2A6)                            | Homo sapiens |
| 2040 | 11730784_blue      | origin recognition complex subunit 4(ORC4)                          | Homo sapiens |
| 2041 | 11730795_turquoise | mitochondrial ribosomal protein L4(MRPL4)                           | Homo sapiens |
| 2042 | 11730804_turquoise | pre-mRNA processing factor 38B(PRP38B)                              | Homo sapiens |
| 2043 | 11730806_turquoise | butyrophilin subfamily 3 member A2(BTN3A2)                          | Homo sapiens |
| 2044 | 11730807_turquoise | butyrophilin subfamily 3 member A2(BTN3A2)                          | Homo sapiens |
| 2045 | 11730813_turquoise | leukocyte immunoglobulin like receptor B4(LILRB4)                   | Homo sapiens |
| 2046 | 11730815_turquoise | leukocyte immunoglobulin like receptor B4(LILRB4)                   | Homo sapiens |
| 2047 | 11730817_turquoise | CTD small phosphatase like 2(CTDSPL2)                               | Homo sapiens |
| 2048 | 11730835_blue      | metaxin 2(MTX2)                                                     | Homo sapiens |

|      |                    |                                                                                   |              |
|------|--------------------|-----------------------------------------------------------------------------------|--------------|
| 2049 | 11730837_turquoise | WD repeat domain 55(WDR55)                                                        | Homo sapiens |
| 2050 | 11730862_turquoise | CTTNBP2 N-terminal like(CTTNBP2NL)                                                | Homo sapiens |
| 2051 | 11730864_turquoise | CTTNBP2 N-terminal like(CTTNBP2NL)                                                | Homo sapiens |
| 2052 | 11730873_turquoise | Ras association domain family member 5(RASSF5)                                    | Homo sapiens |
| 2053 | 11730875_turquoise | Fanconi anemia complementation group I(FANCI)                                     | Homo sapiens |
| 2054 | 11730894_turquoise | ubiquitin like modifier activating enzyme 6(UBA6)                                 | Homo sapiens |
| 2055 | 11730909_turquoise | C-C motif chemokine receptor 5 (gene/pseudogene)(CCR5)                            | Homo sapiens |
| 2056 | 11730914_turquoise | ER lipid raft associated 1(ERLIN1)                                                | Homo sapiens |
| 2057 | 11730923_turquoise | ADAM metallopeptidase with thrombospondin type 1 motif 4(ADAMTS4)                 | Homo sapiens |
| 2058 | 11730928_turquoise | inhibitor of kappa light polypeptide gene enhancer in B-cells, kinase beta(IKBKB) | Homo sapiens |
| 2059 | 11730929_turquoise | inhibitor of kappa light polypeptide gene enhancer in B-cells, kinase beta(IKBKB) | Homo sapiens |
| 2060 | 11730930_turquoise | inhibitor of kappa light polypeptide gene enhancer in B-cells, kinase beta(IKBKB) | Homo sapiens |
| 2061 | 11730931_turquoise | acyl-CoA synthetase short-chain family member 3(ACSS3)                            | Homo sapiens |
| 2062 | 11730932_turquoise | acyl-CoA synthetase short-chain family member 3(ACSS3)                            | Homo sapiens |
| 2063 | 11730935_turquoise | AT-hook transcription factor(AKNA)                                                | Homo sapiens |
| 2064 | 11730936_turquoise | AT-hook transcription factor(AKNA)                                                | Homo sapiens |
| 2065 | 11730943_turquoise | osteoclast associated, immunoglobulin-like receptor(OSCAR)                        | Homo sapiens |
| 2066 | 11730947_turquoise | interferon gamma(IFNG)                                                            | Homo sapiens |
| 2067 | 11730958_blue      | coiled-coil-helix-coiled-coil-helix domain containing 4(CHCHD4)                   | Homo sapiens |
| 2068 | 11730962_turquoise | choline/ethanolamine phosphotransferase 1(CEPT1)                                  | Homo sapiens |
| 2069 | 11730966_turquoise | mitogen-activated protein kinase 11(MAPK11)                                       | Homo sapiens |
| 2070 | 11730968_turquoise | RIC8 guanine nucleotide exchange factor B(RIC8B)                                  | Homo sapiens |
| 2071 | 11730994_turquoise | sphingosine-1-phosphate receptor 4(S1PR4)                                         | Homo sapiens |
| 2072 | 11730996_turquoise | junction adhesion molecule like(JAML)                                             | Homo sapiens |
| 2073 | 11731004_turquoise | MIS18 binding protein 1(MIS18BP1)                                                 | Homo sapiens |
| 2074 | 11731005_turquoise | MIS18 binding protein 1(MIS18BP1)                                                 | Homo sapiens |
| 2075 | 11731006_turquoise | MIS18 binding protein 1(MIS18BP1)                                                 | Homo sapiens |
| 2076 | 11731019_turquoise | allograft inflammatory factor 1(AIF1)                                             | Homo sapiens |
| 2077 | 11731023_turquoise | ataxin 7(ATXN7)                                                                   | Homo sapiens |
| 2078 | 11731024_turquoise | ataxin 7(ATXN7)                                                                   | Homo sapiens |
| 2079 | 11731036_turquoise | fibrinogen C domain containing 1(FIBCD1)                                          | Homo sapiens |
| 2080 | 11731039_turquoise | interleukin 15 receptor subunit alpha(IL15RA)                                     | Homo sapiens |
| 2081 | 11731066_turquoise | GTPase, IMAP family member 1(GIMAP1)                                              | Homo sapiens |
| 2082 | 11731110_turquoise | ADAM metallopeptidase domain 17(ADAM17)                                           | Homo sapiens |
| 2083 | 11731147_turquoise | toll like receptor 7(TLR7)                                                        | Homo sapiens |
| 2084 | 11731148_turquoise | toll like receptor 7(TLR7)                                                        | Homo sapiens |
| 2085 | 11731181_turquoise | epithelial stromal interaction 1(EPSTI1)                                          | Homo sapiens |
| 2086 | 11731196_turquoise | proline rich 5 like(PRR5L)                                                        | Homo sapiens |
| 2087 | 11731197_turquoise | proline rich 5 like(PRR5L)                                                        | Homo sapiens |
| 2088 | 11731200_turquoise | toll like receptor 5(TLR5)                                                        | Homo sapiens |
| 2089 | 11731209_turquoise | chromosome 15 open reading frame 59(C15orf59)                                     | Homo sapiens |
| 2090 | 11731227_turquoise | megakaryocyte-associated tyrosine kinase(MATK)                                    | Homo sapiens |
| 2091 | 11731230_turquoise | RNA pseudouridylate synthase domain containing 3(RPUSD3)                          | Homo sapiens |
| 2092 | 11731248_brown     | transmembrane protein 116(TMEM116)                                                | Homo sapiens |
| 2093 | 11731281_turquoise | nuclear factor of activated T-cells 1(NFATC1)                                     | Homo sapiens |
| 2094 | 11731309_turquoise | chromosome 15 open reading frame 56(C15orf56)                                     | Homo sapiens |
| 2095 | 11731340_turquoise | nucleotide binding oligomerization domain containing 2(NOD2)                      | Homo sapiens |
| 2096 | 11731346_turquoise | diacylglycerol kinase zeta(DGKZ)                                                  | Homo sapiens |
| 2097 | 11731356_turquoise | inositol hexakisphosphate kinase 3(IP6K3)                                         | Homo sapiens |
| 2098 | 11731360_turquoise | inducible T-cell costimulator(ICOS)                                               | Homo sapiens |

|      |                    |                                                                                 |              |
|------|--------------------|---------------------------------------------------------------------------------|--------------|
| 2099 | 11731394_turquoise | vimentin(VIM)                                                                   | Homo sapiens |
| 2100 | 11731407_turquoise | interferon induced protein with tetratricopeptide repeats 3(IFIT3)              | Homo sapiens |
| 2101 | 11731417_blue      | NADH:ubiquinone oxidoreductase core subunit S1(NDUFS1)                          | Homo sapiens |
| 2102 | 11731422_turquoise | Fc fragment of IgG receptor IIIa(FCGR3A)                                        | Homo sapiens |
| 2103 | 11731433_turquoise | selenoprotein P(SELENOP)                                                        | Homo sapiens |
| 2104 | 11731465_turquoise | cathepsin C(CTSC)                                                               | Homo sapiens |
| 2105 | 11731466_turquoise | cathepsin C(CTSC)                                                               | Homo sapiens |
| 2106 | 11731485_turquoise | nuclear factor I C(NFIC)                                                        | Homo sapiens |
| 2107 | 11731504_turquoise | chromosome 22 open reading frame 39(C22orf39)                                   | Homo sapiens |
| 2108 | 11731505_turquoise | chromosome 22 open reading frame 39(C22orf39)                                   | Homo sapiens |
| 2109 | 11731518_turquoise | microfibrillar associated protein 3(MFAP3)                                      | Homo sapiens |
| 2110 | 11731531_turquoise | docking protein 1(DOK1)                                                         | Homo sapiens |
| 2111 | 11731555_turquoise | synaptopodin 2(SYNPO2)                                                          | Homo sapiens |
| 2112 | 11731556_turquoise | synaptopodin 2(SYNPO2)                                                          | Homo sapiens |
| 2113 | 11731557_blue      | synaptopodin 2(SYNPO2)                                                          | Homo sapiens |
| 2114 | 11731575_turquoise | chitobiase(CTBS)                                                                | Homo sapiens |
| 2115 | 11731613_turquoise | Ras homolog enriched in brain like 1(RHEBL1)                                    | Homo sapiens |
| 2116 | 11731614_blue      | electron transfer flavoprotein alpha subunit(ETFA)                              | Homo sapiens |
| 2117 | 11731617_turquoise | SID1 transmembrane family member 1(SIDT1)                                       | Homo sapiens |
| 2118 | 11731620_turquoise | arrestin beta 2(ARRB2)                                                          | Homo sapiens |
| 2119 | 11731641_turquoise | trafficking protein particle complex subunit 10-like(LOC102724200)              | Homo sapiens |
| 2120 | 11731644_turquoise | trafficking protein particle complex subunit 10-like(LOC102724200)              | Homo sapiens |
| 2121 | 11731657_turquoise | vav guanine nucleotide exchange factor 3(VAV3)                                  | Homo sapiens |
| 2122 | 11731667_turquoise | platelet derived growth factor subunit B(PDGFB)                                 | Homo sapiens |
| 2123 | 11731669_turquoise | G protein-coupled receptor 65(GPR65)                                            | Homo sapiens |
| 2124 | 11731671_brown     | FUN14 domain containing 1(FUNDC1)                                               | Homo sapiens |
| 2125 | 11731676_turquoise | C-C motif chemokine receptor 2(CCR2)                                            | Homo sapiens |
| 2126 | 11731702_turquoise | C-type lectin domain family 2 member D(CLEC2D)                                  | Homo sapiens |
| 2127 | 11731722_turquoise | aldehyde dehydrogenase 3 family member B1(ALDH3B1)                              | Homo sapiens |
| 2128 | 11731728_turquoise | purinergic receptor P2Y13(P2RY13)                                               | Homo sapiens |
| 2129 | 11731729_turquoise | purinergic receptor P2Y13(P2RY13)                                               | Homo sapiens |
| 2130 | 11731755_turquoise | synaptotagmin like 2(SYTL2)                                                     | Homo sapiens |
| 2131 | 11731764_turquoise | CD3g molecule(CD3G)                                                             | Homo sapiens |
| 2132 | 11731770_turquoise | dermatan sulfate epimerase(DSE)                                                 | Homo sapiens |
| 2133 | 11731777_turquoise | protein O-linked mannose N-acetylglucosaminyltransferase 2 (beta 1,4-)(POMGNT2) | Homo sapiens |
| 2134 | 11731783_turquoise | RAS protein activator like 3(RASAL3)                                            | Homo sapiens |
| 2135 | 11731798_turquoise | galectin 2(LGALS2)                                                              | Homo sapiens |
| 2136 | 11731799_turquoise | urocortin 3(UCN3)                                                               | Homo sapiens |
| 2137 | 11731818_turquoise | CD40 molecule(CD40)                                                             | Homo sapiens |
| 2138 | 11731820_turquoise | ADAM metallopeptidase domain 11(ADAM11)                                         | Homo sapiens |
| 2139 | 11731821_turquoise | ADAM metallopeptidase domain 11(ADAM11)                                         | Homo sapiens |
| 2140 | 11731845_turquoise | immunoglobulin superfamily member 3(IGSF3)                                      | Homo sapiens |
| 2141 | 11731848_turquoise | killer cell lectin like receptor C1(KLRC1)                                      | Homo sapiens |
| 2142 | 11731873_turquoise | CD209 molecule(CD209)                                                           | Homo sapiens |
| 2143 | 11731879_turquoise | NLR family pyrin domain containing 1(NLRP1)                                     | Homo sapiens |
| 2144 | 11731880_turquoise | NLR family pyrin domain containing 1(NLRP1)                                     | Homo sapiens |
| 2145 | 11731914_turquoise | adhesion molecule with Ig like domain 1(AMIGO1)                                 | Homo sapiens |
| 2146 | 11731932_blue      | KN motif and ankyrin repeat domains 1(KANK1)                                    | Homo sapiens |
| 2147 | 11731942_turquoise | PR/SET domain 1(PRDM1)                                                          | Homo sapiens |
| 2148 | 11731949_turquoise | sterile alpha motif domain containing 3(SAMD3)                                  | Homo sapiens |

|      |                    |                                                           |              |
|------|--------------------|-----------------------------------------------------------|--------------|
| 2149 | 11731950_turquoise | sterile alpha motif domain containing 3(SAMD3)            | Homo sapiens |
| 2150 | 11731978_turquoise | proprotein convertase subtilisin/kexin type 7(PCSK7)      | Homo sapiens |
| 2151 | 11731998_turquoise | coiled-coil domain containing 88C(CCDC88C)                | Homo sapiens |
| 2152 | 11732004_turquoise | adenosine deaminase like(ADAL)                            | Homo sapiens |
| 2153 | 11732006_turquoise | adenosine deaminase like(ADAL)                            | Homo sapiens |
| 2154 | 11732017_turquoise | interleukin 18 receptor accessory protein(IL18RAP)        | Homo sapiens |
| 2155 | 11732058_turquoise | cell division cycle 7(CDC7)                               | Homo sapiens |
| 2156 | 11732084_turquoise | transcription factor EC(TFEC)                             | Homo sapiens |
| 2157 | 11732110_turquoise | interleukin 4 induced 1(IL4I1)                            | Homo sapiens |
| 2158 | 11732153_turquoise | zinc finger DHHC-type containing 6(ZDHHC6)                | Homo sapiens |
| 2159 | 11732155_turquoise | O-linked N-acetylglucosamine (GlcNAc) transferase(OGT)    | Homo sapiens |
| 2160 | 11732169_turquoise | protein tyrosine phosphatase, non-receptor type 7(PTPN7)  | Homo sapiens |
| 2161 | 11732171_turquoise | G-rich RNA sequence binding factor 1(GRSF1)               | Homo sapiens |
| 2162 | 11732180_turquoise | platelet activating factor receptor(PTAFR)                | Homo sapiens |
| 2163 | 11732181_turquoise | platelet activating factor receptor(PTAFR)                | Homo sapiens |
| 2164 | 11732193_blue      | myeloid leukemia factor 1(MLF1)                           | Homo sapiens |
| 2165 | 11732218_turquoise | BH3 interacting domain death agonist(BID)                 | Homo sapiens |
| 2166 | 11732220_turquoise | enoyl-CoA delta isomerase 1(ECI1)                         | Homo sapiens |
| 2167 | 11732232_turquoise | ORAI calcium release-activated calcium modulator 2(ORAI2) | Homo sapiens |
| 2168 | 11732243_turquoise | apolipoprotein L6(APOL6)                                  | Homo sapiens |
| 2169 | 11732244_turquoise | apolipoprotein L6(APOL6)                                  | Homo sapiens |
| 2170 | 11732247_turquoise | heterogeneous nuclear ribonucleoprotein C (C1/C2)(HNRNPC) | Homo sapiens |
| 2171 | 11732265_turquoise | leukocyte immunoglobulin like receptor B1(LILRB1)         | Homo sapiens |
| 2172 | 11732266_turquoise | leukocyte immunoglobulin like receptor B1(LILRB1)         | Homo sapiens |
| 2173 | 11732273_turquoise | cytochrome c oxidase assembly factor 7 (putative)(COA7)   | Homo sapiens |
| 2174 | 11732275_turquoise | C-C motif chemokine ligand 5(CCL5)                        | Homo sapiens |
| 2175 | 11732276_turquoise | C-C motif chemokine ligand 5(CCL5)                        | Homo sapiens |
| 2176 | 11732278_turquoise | forkhead box P1(FOXP1)                                    | Homo sapiens |
| 2177 | 11732315_turquoise | sarcoglycan delta(SGCD)                                   | Homo sapiens |
| 2178 | 11732322_brown     | frataxin(FXN)                                             | Homo sapiens |
| 2179 | 11732323_turquoise | frataxin(FXN)                                             | Homo sapiens |
| 2180 | 11732331_turquoise | ADP ribosylation factor like GTPase 4C(ARL4C)             | Homo sapiens |
| 2181 | 11732349_turquoise | leukocyte immunoglobulin like receptor A6(LILRA6)         | Homo sapiens |
| 2182 | 11732355_turquoise | major histocompatibility complex, class I, F(HLA-F)       | Homo sapiens |
| 2183 | 11732366_turquoise | S-phase cyclin A associated protein in the ER(SCAPER)     | Homo sapiens |
| 2184 | 11732369_turquoise | fibroblast growth factor 14(FGF14)                        | Homo sapiens |
| 2185 | 11732402_turquoise | UBA domain containing 1(UBAC1)                            | Homo sapiens |
| 2186 | 11732414_turquoise | leucine rich repeat containing 8 family member B(LRRC8B)  | Homo sapiens |
| 2187 | 11732418_turquoise | family with sequence similarity 105 member A(FAM105A)     | Homo sapiens |
| 2188 | 11732424_turquoise | ankyrin repeat domain 22(ANKRD22)                         | Homo sapiens |
| 2189 | 11732425_turquoise | ankyrin repeat domain 22(ANKRD22)                         | Homo sapiens |
| 2190 | 11732435_turquoise | SLP adaptor and CSK interacting membrane protein(SCIMP)   | Homo sapiens |
| 2191 | 11732450_turquoise | agrin(AGRN)                                               | Homo sapiens |
| 2192 | 11732456_turquoise | membrane associated ring-CH-type finger 1(MARCH1)         | Homo sapiens |
| 2193 | 11732466_turquoise | C-X-C motif chemokine ligand 11(CXCL11)                   | Homo sapiens |
| 2194 | 11732467_turquoise | C-X-C motif chemokine ligand 11(CXCL11)                   | Homo sapiens |
| 2195 | 11732469_turquoise | interleukin 3 receptor subunit alpha(IL3RA)               | Homo sapiens |
| 2196 | 11732479_turquoise | integrin subunit alpha M(ITGAM)                           | Homo sapiens |
| 2197 | 11732480_turquoise | integrin subunit alpha M(ITGAM)                           | Homo sapiens |
| 2198 | 11732481_turquoise | integrin subunit alpha M(ITGAM)                           | Homo sapiens |

|      |                    |                                                                     |              |
|------|--------------------|---------------------------------------------------------------------|--------------|
| 2199 | 11732492_turquoise | KIAA1549(KIAA1549)                                                  | Homo sapiens |
| 2200 | 11732501_blue      | tropomodulin 1(TMOD1)                                               | Homo sapiens |
| 2201 | 11732514_turquoise | LYN proto-oncogene, Src family tyrosine kinase(LYN)                 | Homo sapiens |
| 2202 | 11732519_turquoise | cholesterol 25-hydroxylase(CH25H)                                   | Homo sapiens |
| 2203 | 11732520_brown     | RAD51 paralog C(RAD51C)                                             | Homo sapiens |
| 2204 | 11732524_blue      | carnitine palmitoyltransferase 1B(CPT1B)                            | Homo sapiens |
| 2205 | 11732526_turquoise | chondroitin sulfate N-acetylgalactosaminyltransferase 1(CSGALNACT1) | Homo sapiens |
| 2206 | 11732528_turquoise | T-box 5(TBX5)                                                       | Homo sapiens |
| 2207 | 11732529_turquoise | T-box 5(TBX5)                                                       | Homo sapiens |
| 2208 | 11732531_turquoise | NEDD4 binding protein 2 like 1(N4BP2L1)                             | Homo sapiens |
| 2209 | 11732533_turquoise | lamin B1(LMNB1)                                                     | Homo sapiens |
| 2210 | 11732538_turquoise | T-box 21(TBX21)                                                     | Homo sapiens |
| 2211 | 11732544_turquoise | G protein-coupled receptor 18(GPR18)                                | Homo sapiens |
| 2212 | 11732550_turquoise | prostaglandin E receptor 2(PTGER2)                                  | Homo sapiens |
| 2213 | 11732555_turquoise | Fas ligand(FASLG)                                                   | Homo sapiens |
| 2214 | 11732580_turquoise | malic enzyme 3(ME3)                                                 | Homo sapiens |
| 2215 | 11732582_brown     | nudix hydrolase 22(NUDT22)                                          | Homo sapiens |
| 2216 | 11732583_brown     | nudix hydrolase 22(NUDT22)                                          | Homo sapiens |
| 2217 | 11732589_turquoise | zinc finger protein 467(ZNF467)                                     | Homo sapiens |
| 2218 | 11732601_turquoise | centrosomal protein 135(CEP135)                                     | Homo sapiens |
| 2219 | 11732602_turquoise | centrosomal protein 135(CEP135)                                     | Homo sapiens |
| 2220 | 11732650_turquoise | hexosaminidase D(HEXDC)                                             | Homo sapiens |
| 2221 | 11732661_turquoise | SCL/TAL1 interrupting locus(STIL)                                   | Homo sapiens |
| 2222 | 11732701_turquoise | chondroitin sulfate N-acetylgalactosaminyltransferase 2(CSGALNACT2) | Homo sapiens |
| 2223 | 11732709_turquoise | sarcoglycan alpha(SGCA)                                             | Homo sapiens |
| 2224 | 11732759_turquoise | GRB2 binding adaptor protein, transmembrane(GAPT)                   | Homo sapiens |
| 2225 | 11732798_turquoise | mirror-image polydactyly 1(MIPOL1)                                  | Homo sapiens |
| 2226 | 11732813_turquoise | dendritic cell associated nuclear protein(DCANP1)                   | Homo sapiens |
| 2227 | 11732827_turquoise | renalase, FAD dependent amine oxidase(RNLS)                         | Homo sapiens |
| 2228 | 11732854_turquoise | scavenger receptor class F member 1(SCARF1)                         | Homo sapiens |
| 2229 | 11732857_blue      | THAP domain containing 1(THAP1)                                     | Homo sapiens |
| 2230 | 11732870_turquoise | caspase 1(CASP1)                                                    | Homo sapiens |
| 2231 | 11732873_turquoise | mitochondrial translation release factor 1(MTRF1)                   | Homo sapiens |
| 2232 | 11732894_turquoise | cyclin dependent kinase like 3(CDKL3)                               | Homo sapiens |
| 2233 | 11732896_turquoise | hydroxysteroid 11-beta dehydrogenase 1 like(HSD11B1L)               | Homo sapiens |
| 2234 | 11732901_turquoise | APOBEC3A and APOBEC3B deletion hybrid(APOBEC3A_B)                   | Homo sapiens |
| 2235 | 11732902_turquoise | apolipoprotein B mRNA editing enzyme catalytic subunit 3B(APOBEC3B) | Homo sapiens |
| 2236 | 11732913_turquoise | SP140 nuclear body protein(SP140)                                   | Homo sapiens |
| 2237 | 11732927_turquoise | killer cell lectin like receptor C1(KLRC1)                          | Homo sapiens |
| 2238 | 11732936_turquoise | TBC1 domain family member 2B(TBC1D2B)                               | Homo sapiens |
| 2239 | 11732956_turquoise | TCR gamma alternate reading frame protein(TARP)                     | Homo sapiens |
| 2240 | 11732999_turquoise | intercellular adhesion molecule 1(ICAM1)                            | Homo sapiens |
| 2241 | 11733000_turquoise | intercellular adhesion molecule 1(ICAM1)                            | Homo sapiens |
| 2242 | 11733004_turquoise | Fc fragment of IgG receptor IIIa(FCGR3A)                            | Homo sapiens |
| 2243 | 11733006_turquoise | angiominin like 2(AMOTL2)                                           | Homo sapiens |
| 2244 | 11733014_turquoise | ring finger protein 213(RNF213)                                     | Homo sapiens |
| 2245 | 11733021_turquoise | lactate dehydrogenase A(LDHA)                                       | Homo sapiens |
| 2246 | 11733023_turquoise | BTG anti-proliferation factor 1(BTG1)                               | Homo sapiens |
| 2247 | 11733024_turquoise | BTG anti-proliferation factor 1(BTG1)                               | Homo sapiens |
| 2248 | 11733030_turquoise | axin interactor, dorsalization associated(AIDA)                     | Homo sapiens |

|      |                     |                                                                     |              |
|------|---------------------|---------------------------------------------------------------------|--------------|
| 2249 | 11733032_ blue      | RNA binding motif protein 18(RBM18)                                 | Homo sapiens |
| 2250 | 11733033_ turquoise | family with sequence similarity 32 member A(FAM32A)                 | Homo sapiens |
| 2251 | 11733046_ turquoise | abl interactor 1(ABI1)                                              | Homo sapiens |
| 2252 | 11733047_ turquoise | abl interactor 1(ABI1)                                              | Homo sapiens |
| 2253 | 11733052_ turquoise | secretory carrier membrane protein 1(SCAMP1)                        | Homo sapiens |
| 2254 | 11733056_ turquoise | polypyrimidine tract binding protein 3(PTBP3)                       | Homo sapiens |
| 2255 | 11733057_ turquoise | polypyrimidine tract binding protein 3(PTBP3)                       | Homo sapiens |
| 2256 | 11733058_ turquoise | polypyrimidine tract binding protein 3(PTBP3)                       | Homo sapiens |
| 2257 | 11733060_ turquoise | pellino E3 ubiquitin protein ligase 1(PELI1)                        | Homo sapiens |
| 2258 | 11733061_ turquoise | pellino E3 ubiquitin protein ligase 1(PELI1)                        | Homo sapiens |
| 2259 | 11733087_ turquoise | MAF bZIP transcription factor(MAF)                                  | Homo sapiens |
| 2260 | 11733088_ turquoise | MAF bZIP transcription factor(MAF)                                  | Homo sapiens |
| 2261 | 11733127_ turquoise | solute carrier family 25 member 26(SLC25A26)                        | Homo sapiens |
| 2262 | 11733134_ brown     | mitochondrial ribosomal protein S33(MRPS33)                         | Homo sapiens |
| 2263 | 11733140_ turquoise | ADP ribosylation factor like GTPase 4A(ARL4A)                       | Homo sapiens |
| 2264 | 11733148_ turquoise | annexin A4(ANXA4)                                                   | Homo sapiens |
| 2265 | 11733149_ turquoise | DEXD/H-box helicase 58(DDX58)                                       | Homo sapiens |
| 2266 | 11733161_ turquoise | TNF alpha induced protein 8(TNFAIP8)                                | Homo sapiens |
| 2267 | 11733162_ turquoise | proline-serine-threonine phosphatase interacting protein 1(PSTPIP1) | Homo sapiens |
| 2268 | 11733187_ turquoise | interleukin 7 receptor(IL7R)                                        | Homo sapiens |
| 2269 | 11733194_ turquoise | formin like 3(FMNL3)                                                | Homo sapiens |
| 2270 | 11733198_ turquoise | DEXD-box helicase 39A(DDX39A)                                       | Homo sapiens |
| 2271 | 11733213_ turquoise | schlafen family member 5(SLFN5)                                     | Homo sapiens |
| 2272 | 11733214_ turquoise | schlafen family member 5(SLFN5)                                     | Homo sapiens |
| 2273 | 11733215_ turquoise | signal transducer and activator of transcription 4(STAT4)           | Homo sapiens |
| 2274 | 11733246_ turquoise | dystrobrevin binding protein 1(DTNBP1)                              | Homo sapiens |
| 2275 | 11733255_ blue      | carnitine palmitoyltransferase 1B(CPT1B)                            | Homo sapiens |
| 2276 | 11733264_ turquoise | echinoderm microtubule associated protein like 1(EML1)              | Homo sapiens |
| 2277 | 11733334_ turquoise | neuropilin 2(NRP2)                                                  | Homo sapiens |
| 2278 | 11733343_ turquoise | UTP6, small subunit processome component(UTP6)                      | Homo sapiens |
| 2279 | 11733353_ turquoise | cytotoxic and regulatory T-cell molecule(CRTAM)                     | Homo sapiens |
| 2280 | 11733355_ turquoise | complement C5a receptor 1(C5AR1)                                    | Homo sapiens |
| 2281 | 11733360_ turquoise | solute carrier family 14 member 1 (Kidd blood group)(SLC14A1)       | Homo sapiens |
| 2282 | 11733370_ turquoise | proteasome activator subunit 1(PSME1)                               | Homo sapiens |
| 2283 | 11733389_ turquoise | DEF6, guanine nucleotide exchange factor(DEF6)                      | Homo sapiens |
| 2284 | 11733402_ turquoise | C-type lectin domain family 7 member A(CLEC7A)                      | Homo sapiens |
| 2285 | 11733403_ turquoise | C-type lectin domain family 7 member A(CLEC7A)                      | Homo sapiens |
| 2286 | 11733411_ turquoise | transcription factor 15 (basic helix-loop-helix)(TCF15)             | Homo sapiens |
| 2287 | 11733439_ turquoise | guanylate binding protein 5(GBP5)                                   | Homo sapiens |
| 2288 | 11733450_ turquoise | schlafen family member 11(SLFN11)                                   | Homo sapiens |
| 2289 | 11733477_ turquoise | succinate receptor 1(SUCNR1)                                        | Homo sapiens |
| 2290 | 11733485_ turquoise | calcium voltage-gated channel subunit alpha1 C(CACNA1C)             | Homo sapiens |
| 2291 | 11733494_ turquoise | NEDD4 binding protein 2 like 2(N4BP2L2)                             | Homo sapiens |
| 2292 | 11733511_ turquoise | myotubularin related protein 1(MTMR1)                               | Homo sapiens |
| 2293 | 11733512_ turquoise | myotubularin related protein 1(MTMR1)                               | Homo sapiens |
| 2294 | 11733523_ blue      | protein phosphatase 1 regulatory subunit 3A(PPP1R3A)                | Homo sapiens |
| 2295 | 11733525_ turquoise | chromosome 2 open reading frame 71(C2orf71)                         | Homo sapiens |
| 2296 | 11733530_ turquoise | complement C1r subcomponent like(C1RL)                              | Homo sapiens |
| 2297 | 11733535_ brown     | nudix hydrolase 7(NUDT7)                                            | Homo sapiens |
| 2298 | 11733576_ brown     | isocitrate dehydrogenase 3 (NAD(+)) beta(IDH3B)                     | Homo sapiens |



|      |           |           |                                                                  |              |
|------|-----------|-----------|------------------------------------------------------------------|--------------|
| 2299 | 11733579_ | turquoise | chromosome 19 open reading frame 47(C19orf47)                    | Homo sapiens |
| 2300 | 11733611_ | turquoise | dedicator of cytokinesis 8(DOCK8)                                | Homo sapiens |
| 2301 | 11733612_ | turquoise | dedicator of cytokinesis 8(DOCK8)                                | Homo sapiens |
| 2302 | 11733616_ | turquoise | histamine N-methyltransferase(HNMT)                              | Homo sapiens |
| 2303 | 11733620_ | turquoise | B-cell CLL/lymphoma 11B(BCL11B)                                  | Homo sapiens |
| 2304 | 11733632_ | turquoise | purinergic receptor P2Y14(P2RY14)                                | Homo sapiens |
| 2305 | 11733641_ | turquoise | kinesin light chain 4(KLC4)                                      | Homo sapiens |
| 2306 | 11733642_ | turquoise | NECAP endocytosis associated 2(NECAP2)                           | Homo sapiens |
| 2307 | 11733643_ | turquoise | NECAP endocytosis associated 2(NECAP2)                           | Homo sapiens |
| 2308 | 11733644_ | turquoise | NECAP endocytosis associated 2(NECAP2)                           | Homo sapiens |
| 2309 | 11733671_ | blue      | EYA transcriptional coactivator and phosphatase 1(EYA1)          | Homo sapiens |
| 2310 | 11733695_ | turquoise | ubiquitin conjugating enzyme E2 C(UBE2C)                         | Homo sapiens |
| 2311 | 11733696_ | turquoise | ubiquitin conjugating enzyme E2 C(UBE2C)                         | Homo sapiens |
| 2312 | 11733698_ | turquoise | serum/glucocorticoid regulated kinase 1(SGK1)                    | Homo sapiens |
| 2313 | 11733699_ | turquoise | TEA domain transcription factor 4(TEAD4)                         | Homo sapiens |
| 2314 | 11733701_ | turquoise | FK506 binding protein 11(FKBP11)                                 | Homo sapiens |
| 2315 | 11733702_ | turquoise | ubiquitin conjugating enzyme E2 C(UBE2C)                         | Homo sapiens |
| 2316 | 11733718_ | turquoise | leukocyte associated immunoglobulin like receptor 2(LAIR2)       | Homo sapiens |
| 2317 | 11733725_ | turquoise | complement factor B(CFB)                                         | Homo sapiens |
| 2318 | 11733736_ | turquoise | CD2 molecule(CD2)                                                | Homo sapiens |
| 2319 | 11733754_ | turquoise | pleckstrin homology domain containing A4(PLEKHA4)                | Homo sapiens |
| 2320 | 11733767_ | turquoise | leukocyte immunoglobulin like receptor A2(LILRA2)                | Homo sapiens |
| 2321 | 11733768_ | turquoise | leukocyte immunoglobulin like receptor A2(LILRA2)                | Homo sapiens |
| 2322 | 11733784_ | turquoise | protein phosphatase 2 scaffold subunit Abeta(PPP2R1B)            | Homo sapiens |
| 2323 | 11733792_ | blue      | solute carrier family 25 member 12(SLC25A12)                     | Homo sapiens |
| 2324 | 11733809_ | turquoise | ARMCX5-GPRASP2 readthrough(ARMCX5-GPRASP2)                       | Homo sapiens |
| 2325 | 11733841_ | turquoise | ecotropic viral integration site 2A(EVI2A)                       | Homo sapiens |
| 2326 | 11733845_ | turquoise | G protein-coupled receptor kinase 6(GRK6)                        | Homo sapiens |
| 2327 | 11733846_ | turquoise | G protein-coupled receptor kinase 6(GRK6)                        | Homo sapiens |
| 2328 | 11733855_ | turquoise | apolipoprotein L1(APOL1)                                         | Homo sapiens |
| 2329 | 11733860_ | blue      | cytoplasmic linker associated protein 2(CLASP2)                  | Homo sapiens |
| 2330 | 11733867_ | turquoise | major histocompatibility complex, class II, DO alpha(HLA-DOA)    | Homo sapiens |
| 2331 | 11733868_ | turquoise | major histocompatibility complex, class II, DO alpha(HLA-DOA)    | Homo sapiens |
| 2332 | 11733869_ | turquoise | major histocompatibility complex, class II, DO alpha(HLA-DOA)    | Homo sapiens |
| 2333 | 11733870_ | turquoise | major histocompatibility complex, class II, DO alpha(HLA-DOA)    | Homo sapiens |
| 2334 | 11733878_ | turquoise | LIM domain 7(LMO7)                                               | Homo sapiens |
| 2335 | 11733894_ | turquoise | transcriptional adaptor 2B(TADA2B)                               | Homo sapiens |
| 2336 | 11733901_ | brown     | ubiquinol-cytochrome c reductase complex III subunit VII(UQCRCQ) | Homo sapiens |
| 2337 | 11733934_ | turquoise | primary cilia formation(PIFO)                                    | Homo sapiens |
| 2338 | 11733946_ | turquoise | RAP2B, member of RAS oncogene family(RAP2B)                      | Homo sapiens |
| 2339 | 11733950_ | turquoise | guanylate binding protein 4(GBP4)                                | Homo sapiens |
| 2340 | 11733951_ | turquoise | guanylate binding protein 4(GBP4)                                | Homo sapiens |
| 2341 | 11733952_ | turquoise | guanylate binding protein 4(GBP4)                                | Homo sapiens |
| 2342 | 11733953_ | turquoise | guanylate binding protein 4(GBP4)                                | Homo sapiens |
| 2343 | 11733960_ | turquoise | USH1 protein network component sans(USH1G)                       | Homo sapiens |
| 2344 | 11733979_ | turquoise | CD28 molecule(CD28)                                              | Homo sapiens |
| 2345 | 11733986_ | turquoise | tubulin alpha 3e(TUBA3E)                                         | Homo sapiens |
| 2346 | 11733992_ | turquoise | transmembrane protein 150C(TMEM150C)                             | Homo sapiens |
| 2347 | 11734006_ | turquoise | interleukin 1 receptor associated kinase 1(IRAK1)                | Homo sapiens |
| 2348 | 11734033_ | brown     | chromosome 15 open reading frame 61(C15orf61)                    | Homo sapiens |

|      |                    |                                                                            |              |
|------|--------------------|----------------------------------------------------------------------------|--------------|
| 2349 | 11734035_turquoise | formyl peptide receptor 2(FPR2)                                            | Homo sapiens |
| 2350 | 11734050_turquoise | T cell receptor associated transmembrane adaptor 1(TRAT1)                  | Homo sapiens |
| 2351 | 11734051_turquoise | T cell receptor associated transmembrane adaptor 1(TRAT1)                  | Homo sapiens |
| 2352 | 11734056_turquoise | prostaglandin reductase 2(PTGR2)                                           | Homo sapiens |
| 2353 | 11734064_turquoise | uncharacterized LOC100130460(CAND1.11)                                     | Homo sapiens |
| 2354 | 11734065_turquoise | uncharacterized LOC100130460(CAND1.11)                                     | Homo sapiens |
| 2355 | 11734066_turquoise | interleukin 1 receptor associated kinase 4(IRAK4)                          | Homo sapiens |
| 2356 | 11734067_turquoise | interleukin 1 receptor associated kinase 4(IRAK4)                          | Homo sapiens |
| 2357 | 11734084_turquoise | sushi domain containing 3(SUSD3)                                           | Homo sapiens |
| 2358 | 11734110_turquoise | T-cell immunoreceptor with Ig and ITIM domains(TIGIT)                      | Homo sapiens |
| 2359 | 11734112_turquoise | T-cell immunoreceptor with Ig and ITIM domains(TIGIT)                      | Homo sapiens |
| 2360 | 11734117_turquoise | butyrophilin subfamily 3 member A3(BTN3A3)                                 | Homo sapiens |
| 2361 | 11734118_turquoise | butyrophilin subfamily 3 member A3(BTN3A3)                                 | Homo sapiens |
| 2362 | 11734126_turquoise | nucleotide binding oligomerization domain containing 1(NOD1)               | Homo sapiens |
| 2363 | 11734139_turquoise | TBC1 domain family member 10C(TBC1D10C)                                    | Homo sapiens |
| 2364 | 11734162_turquoise | transcription factor EC(TFEC)                                              | Homo sapiens |
| 2365 | 11734185_turquoise | zinc finger protein 677(ZNF677)                                            | Homo sapiens |
| 2366 | 11734259_turquoise | sterol carrier protein 2(SCP2)                                             | Homo sapiens |
| 2367 | 11734273_turquoise | G protein-coupled receptor 18(GPR18)                                       | Homo sapiens |
| 2368 | 11734359_turquoise | ribonuclease L(RNASEL)                                                     | Homo sapiens |
| 2369 | 11734394_turquoise | killer cell lectin like receptor C3(KLRC3)                                 | Homo sapiens |
| 2370 | 11734395_turquoise | killer cell lectin like receptor C3(KLRC3)                                 | Homo sapiens |
| 2371 | 11734491_brown     | spermatogenesis associated 24(SPATA24)                                     | Homo sapiens |
| 2372 | 11734521_turquoise | sodium channel and clathrin linker 1(SCLT1)                                | Homo sapiens |
| 2373 | 11734526_turquoise | uncharacterized LOC100507472(LOC100507472)                                 | Homo sapiens |
| 2374 | 11734529_turquoise | paired immunoglobulin like type 2 receptor alpha(PILRA)                    | Homo sapiens |
| 2375 | 11734530_turquoise | major histocompatibility complex, class I, F(HLA-F)                        | Homo sapiens |
| 2376 | 11734536_turquoise | glycoprotein Ib platelet alpha subunit(GP1BA)                              | Homo sapiens |
| 2377 | 11734548_turquoise | transforming growth factor beta induced(TGFBI)                             | Homo sapiens |
| 2378 | 11734549_turquoise | transforming growth factor beta induced(TGFBI)                             | Homo sapiens |
| 2379 | 11734550_turquoise | transforming growth factor beta induced(TGFBI)                             | Homo sapiens |
| 2380 | 11734552_turquoise | C-X3-C motif chemokine ligand 1(CX3CL1)                                    | Homo sapiens |
| 2381 | 11734567_turquoise | RAS guanyl releasing protein 2(RASGRP2)                                    | Homo sapiens |
| 2382 | 11734577_turquoise | sodium voltage-gated channel alpha subunit 5(SCN5A)                        | Homo sapiens |
| 2383 | 11734606_turquoise | C-X-C motif chemokine receptor 3(CXCR3)                                    | Homo sapiens |
| 2384 | 11734652_blue      | ATP synthase, H+ transporting, mitochondrial Fo complex subunit B1(ATP5F1) | Homo sapiens |
| 2385 | 11734653_blue      | ATP synthase, H+ transporting, mitochondrial Fo complex subunit B1(ATP5F1) | Homo sapiens |
| 2386 | 11734657_turquoise | solute carrier family 2 member 14(SLC2A14)                                 | Homo sapiens |
| 2387 | 11734659_turquoise | Fos proto-oncogene, AP-1 transcription factor subunit(FOS)                 | Homo sapiens |
| 2388 | 11734661_turquoise | calsyntenin 3(CLSTN3)                                                      | Homo sapiens |
| 2389 | 11734672_turquoise | nuclear factor of activated T-cells 4(NFATC4)                              | Homo sapiens |
| 2390 | 11734684_turquoise | uridine monophosphate synthetase(UMPS)                                     | Homo sapiens |
| 2391 | 11734687_turquoise | methyl-CpG binding domain protein 2(MBD2)                                  | Homo sapiens |
| 2392 | 11734690_turquoise | cytohesin 1 interacting protein(CYTIP)                                     | Homo sapiens |
| 2393 | 11734695_turquoise | protein phosphatase 4 catalytic subunit(PPP4C)                             | Homo sapiens |
| 2394 | 11734715_turquoise | DBF4 zinc finger(DBF4)                                                     | Homo sapiens |
| 2395 | 11734727_turquoise | interleukin 16(IL16)                                                       | Homo sapiens |
| 2396 | 11734731_brown     | mitochondrial ribosomal protein S12(MRPS12)                                | Homo sapiens |
| 2397 | 11734746_brown     | CDKN2A interacting protein N-terminal like(CDKN2AIPNL)                     | Homo sapiens |
| 2398 | 11734747_turquoise | complement component 4B (Chido blood group), copy 2(C4B_2)                 | Homo sapiens |

|      |                    |                                                                                   |              |
|------|--------------------|-----------------------------------------------------------------------------------|--------------|
| 2399 | 11734772_turquoise | synergin gamma(SYNRG)                                                             | Homo sapiens |
| 2400 | 11734783_turquoise | chloride intracellular channel 2(CLIC2)                                           | Homo sapiens |
| 2401 | 11734784_turquoise | chloride intracellular channel 2(CLIC2)                                           | Homo sapiens |
| 2402 | 11734785_turquoise | chloride intracellular channel 2(CLIC2)                                           | Homo sapiens |
| 2403 | 11734791_turquoise | septin 6(SEPT6)                                                                   | Homo sapiens |
| 2404 | 11734798_turquoise | ring finger protein, LIM domain interacting(RLIM)                                 | Homo sapiens |
| 2405 | 11734825_turquoise | sprouty related EVH1 domain containing 1(SPRED1)                                  | Homo sapiens |
| 2406 | 11734826_turquoise | sprouty related EVH1 domain containing 1(SPRED1)                                  | Homo sapiens |
| 2407 | 11734852_turquoise | RUN and cysteine rich domain containing beclin 1 interacting protein like(RUBCNL) | Homo sapiens |
| 2408 | 11734862_blue      | trimethyllysine hydroxylase, epsilon(TMLHE)                                       | Homo sapiens |
| 2409 | 11734870_turquoise | NAD kinase(NADK)                                                                  | Homo sapiens |
| 2410 | 11734873_turquoise | S-phase cyclin A associated protein in the ER(SCAPER)                             | Homo sapiens |
| 2411 | 11734890_turquoise | interleukin 32(IL32)                                                              | Homo sapiens |
| 2412 | 11734894_turquoise | CST telomere replication complex component 1(CTC1)                                | Homo sapiens |
| 2413 | 11734921_turquoise | zinc finger protein 276(ZNF276)                                                   | Homo sapiens |
| 2414 | 11734922_turquoise | zinc finger protein 276(ZNF276)                                                   | Homo sapiens |
| 2415 | 11734924_turquoise | ATPase H+ transporting V1 subunit G2(ATP6V1G2)                                    | Homo sapiens |
| 2416 | 11734938_turquoise | colony stimulating factor 2 receptor alpha subunit(CSF2RA)                        | Homo sapiens |
| 2417 | 11734943_turquoise | SLAM family member 6(SLAMF6)                                                      | Homo sapiens |
| 2418 | 11734944_turquoise | SLAM family member 6(SLAMF6)                                                      | Homo sapiens |
| 2419 | 11734948_turquoise | fibroblast growth factor 7(FGF7)                                                  | Homo sapiens |
| 2420 | 11734962_turquoise | ADAM metallopeptidase domain 33(ADAM33)                                           | Homo sapiens |
| 2421 | 11734967_turquoise | thymocyte selection associated(THEMIS)                                            | Homo sapiens |
| 2422 | 11735003_turquoise | suppression of tumorigenicity 7 like(ST7L)                                        | Homo sapiens |
| 2423 | 11735026_turquoise | sialophorin(SPN)                                                                  | Homo sapiens |
| 2424 | 11735027_turquoise | sialophorin(SPN)                                                                  | Homo sapiens |
| 2425 | 11735039_turquoise | shootin 1(SHTN1)                                                                  | Homo sapiens |
| 2426 | 11735040_blue      | ribosomal protein L3 like(RPL3L)                                                  | Homo sapiens |
| 2427 | 11735044_turquoise | tripartite motif containing 5(TRIM5)                                              | Homo sapiens |
| 2428 | 11735096_brown     | MLX, MAX dimerization protein(MLX)                                                | Homo sapiens |
| 2429 | 11735097_blue      | MLX, MAX dimerization protein(MLX)                                                | Homo sapiens |
| 2430 | 11735124_turquoise | interaction protein for cytohesin exchange factors 1(IPCEF1)                      | Homo sapiens |
| 2431 | 11735157_turquoise | cysteinyl leukotriene receptor 1(CYSLTR1)                                         | Homo sapiens |
| 2432 | 11735173_turquoise | small nuclear ribonucleoprotein polypeptide N(SNRPN)                              | Homo sapiens |
| 2433 | 11735174_turquoise | interleukin 32(IL32)                                                              | Homo sapiens |
| 2434 | 11735189_turquoise | H2A histone family member Y(H2AFY)                                                | Homo sapiens |
| 2435 | 11735192_turquoise | adhesion G protein-coupled receptor E2(ADGRE2)                                    | Homo sapiens |
| 2436 | 11735204_turquoise | methylmalonic aciduria (cobalamin deficiency) cblA type(MMAA)                     | Homo sapiens |
| 2437 | 11735205_turquoise | methylmalonic aciduria (cobalamin deficiency) cblA type(MMAA)                     | Homo sapiens |
| 2438 | 11735220_turquoise | lysophosphatidic acid receptor 3(LPAR3)                                           | Homo sapiens |
| 2439 | 11735221_turquoise | B and T lymphocyte associated(BTLA)                                               | Homo sapiens |
| 2440 | 11735222_turquoise | B and T lymphocyte associated(BTLA)                                               | Homo sapiens |
| 2441 | 11735223_turquoise | killer cell lectin like receptor G1(KLRG1)                                        | Homo sapiens |
| 2442 | 11735224_turquoise | killer cell lectin like receptor G1(KLRG1)                                        | Homo sapiens |
| 2443 | 11735225_turquoise | guanidinoacetate N-methyltransferase(GAMT)                                        | Homo sapiens |
| 2444 | 11735249_turquoise | SP140 nuclear body protein like(SP140L)                                           | Homo sapiens |
| 2445 | 11735270_turquoise | glucosaminyl (N-acetyl) transferase 1, core 2(GCNT1)                              | Homo sapiens |
| 2446 | 11735271_turquoise | glucosaminyl (N-acetyl) transferase 1, core 2(GCNT1)                              | Homo sapiens |
| 2447 | 11735275_turquoise | interleukin 18 receptor 1(IL18R1)                                                 | Homo sapiens |
| 2448 | 11735284_turquoise | lysine methyltransferase 2E(KMT2E)                                                | Homo sapiens |

|      |                    |                                                                             |              |
|------|--------------------|-----------------------------------------------------------------------------|--------------|
| 2449 | 11735290_turquoise | TNFAIP3 interacting protein 2(TNIP2)                                        | Homo sapiens |
| 2450 | 11735329_turquoise | CD47 molecule(CD47)                                                         | Homo sapiens |
| 2451 | 11735362_blue      | AKT interacting protein(AKTIP)                                              | Homo sapiens |
| 2452 | 11735394_turquoise | X-C motif chemokine ligand 1(XCL1)                                          | Homo sapiens |
| 2453 | 11735416_turquoise | DNA cross-link repair 1C(DCLRE1C)                                           | Homo sapiens |
| 2454 | 11735429_turquoise | ring finger protein 135(RNF135)                                             | Homo sapiens |
| 2455 | 11735474_turquoise | CD8b molecule(CD8B)                                                         | Homo sapiens |
| 2456 | 11735502_turquoise | TAP binding protein(TAPBP)                                                  | Homo sapiens |
| 2457 | 11735504_turquoise | NLR family CARD domain containing 4(NLRC4)                                  | Homo sapiens |
| 2458 | 11735551_turquoise | Fc receptor like 6(FCRL6)                                                   | Homo sapiens |
| 2459 | 11735552_turquoise | Fc receptor like 6(FCRL6)                                                   | Homo sapiens |
| 2460 | 11735623_turquoise | proteasome subunit beta 9(PSMB9)                                            | Homo sapiens |
| 2461 | 11735710_turquoise | SAM domain, SH3 domain and nuclear localization signals 1(SAMS1)            | Homo sapiens |
| 2462 | 11735711_turquoise | casein kinase 1 gamma 2(CSNK1G2)                                            | Homo sapiens |
| 2463 | 11735712_turquoise | casein kinase 1 gamma 2(CSNK1G2)                                            | Homo sapiens |
| 2464 | 11735713_turquoise | casein kinase 1 gamma 2(CSNK1G2)                                            | Homo sapiens |
| 2465 | 11735732_turquoise | ribonuclease P/MRP subunit p14(RPP14)                                       | Homo sapiens |
| 2466 | 11735740_turquoise | RAS p21 protein activator 3(RASA3)                                          | Homo sapiens |
| 2467 | 11735741_turquoise | RAS p21 protein activator 3(RASA3)                                          | Homo sapiens |
| 2468 | 11735767_turquoise | chromosome 16 open reading frame 54(C16orf54)                               | Homo sapiens |
| 2469 | 11735768_turquoise | chromosome 16 open reading frame 54(C16orf54)                               | Homo sapiens |
| 2470 | 11735790_turquoise | protein tyrosine phosphatase, non-receptor type 18(PTPN18)                  | Homo sapiens |
| 2471 | 11735864_turquoise | CD160 molecule(CD160)                                                       | Homo sapiens |
| 2472 | 11735937_turquoise | CD48 molecule(CD48)                                                         | Homo sapiens |
| 2473 | 11735956_turquoise | methyltransferase like 11B(METTL11B)                                        | Homo sapiens |
| 2474 | 11735989_yellow    | joining chain of multimeric IgA and IgM(JCHAIN)                             | Homo sapiens |
| 2475 | 11735990_yellow    | joining chain of multimeric IgA and IgM(JCHAIN)                             | Homo sapiens |
| 2476 | 11735997_turquoise | apolipoprotein L1(APOL1)                                                    | Homo sapiens |
| 2477 | 11735998_turquoise | apolipoprotein L1(APOL1)                                                    | Homo sapiens |
| 2478 | 11736030_turquoise | microRNA 6787(MIR6787)                                                      | Homo sapiens |
| 2479 | 11736049_brown     | family with sequence similarity 229 member B(FAM229B)                       | Homo sapiens |
| 2480 | 11736050_brown     | family with sequence similarity 229 member B(FAM229B)                       | Homo sapiens |
| 2481 | 11736064_turquoise | purinergic receptor P2X 7(P2RX7)                                            | Homo sapiens |
| 2482 | 11736065_turquoise | purinergic receptor P2X 7(P2RX7)                                            | Homo sapiens |
| 2483 | 11736094_turquoise | dCMP deaminase(DCTD)                                                        | Homo sapiens |
| 2484 | 11736097_turquoise | golgi associated, gamma adaptin ear containing, ARF binding protein 1(GGA1) | Homo sapiens |
| 2485 | 11736111_turquoise | Rho GTPase activating protein 18(ARHGAP18)                                  | Homo sapiens |
| 2486 | 11736112_turquoise | Rho GTPase activating protein 18(ARHGAP18)                                  | Homo sapiens |
| 2487 | 11736113_turquoise | Rho GTPase activating protein 18(ARHGAP18)                                  | Homo sapiens |
| 2488 | 11736132_turquoise | discoidin, CUB and LCCL domain containing 2(DCBLD2)                         | Homo sapiens |
| 2489 | 11736133_turquoise | PHD finger protein 19(PHF19)                                                | Homo sapiens |
| 2490 | 11736135_turquoise | 2'-5'-oligoadenylate synthetase 2(OAS2)                                     | Homo sapiens |
| 2491 | 11736136_turquoise | 2'-5'-oligoadenylate synthetase 2(OAS2)                                     | Homo sapiens |
| 2492 | 11736207_turquoise | plexin C1(PLXNC1)                                                           | Homo sapiens |
| 2493 | 11736217_turquoise | mitogen-activated protein kinase kinase kinase 8(MAP3K8)                    | Homo sapiens |
| 2494 | 11736224_turquoise | spermatogenesis associated serine rich 2(SPATS2)                            | Homo sapiens |
| 2495 | 11736225_turquoise | spermatogenesis associated serine rich 2(SPATS2)                            | Homo sapiens |
| 2496 | 11736233_turquoise | phosphotriesterase related(PTER)                                            | Homo sapiens |
| 2497 | 11736241_turquoise | ORMDL sphingolipid biosynthesis regulator 2(ORMDL2)                         | Homo sapiens |
| 2498 | 11736247_turquoise | adhesion molecule with Ig like domain 2(AMIGO2)                             | Homo sapiens |

|      |           |           |                                                                    |              |
|------|-----------|-----------|--------------------------------------------------------------------|--------------|
| 2499 | 11736255_ | turquoise | inositol polyphosphate-4-phosphatase type I A(INPP4A)              | Homo sapiens |
| 2500 | 11736273_ | turquoise | toll like receptor 2(TLR2)                                         | Homo sapiens |
| 2501 | 11736296_ | blue      | solute carrier family 5 member 1(SLC5A1)                           | Homo sapiens |
| 2502 | 11736297_ | turquoise | solute carrier family 5 member 1(SLC5A1)                           | Homo sapiens |
| 2503 | 11736311_ | turquoise | Fc fragment of IgG receptor Ic, pseudogene(FCGR1CP)                | Homo sapiens |
| 2504 | 11736324_ | turquoise | CD96 molecule(CD96)                                                | Homo sapiens |
| 2505 | 11736330_ | turquoise | solute carrier family 2 member 11(SLC2A11)                         | Homo sapiens |
| 2506 | 11736342_ | turquoise | early growth response 3(EGR3)                                      | Homo sapiens |
| 2507 | 11736375_ | turquoise | CD86 molecule(CD86)                                                | Homo sapiens |
| 2508 | 11736376_ | turquoise | membrane palmitoylated protein 3(MPP3)                             | Homo sapiens |
| 2509 | 11736378_ | turquoise | male-specific lethal 2 homolog (Drosophila)(MSL2)                  | Homo sapiens |
| 2510 | 11736394_ | turquoise | interleukin 32(IL32)                                               | Homo sapiens |
| 2511 | 11736405_ | turquoise | DNA methyltransferase 1(DNMT1)                                     | Homo sapiens |
| 2512 | 11736409_ | turquoise | nucleoporin 62(NUP62)                                              | Homo sapiens |
| 2513 | 11736414_ | turquoise | melanotransferrin(MELTF)                                           | Homo sapiens |
| 2514 | 11736419_ | turquoise | zinc finger protein 800(ZNF800)                                    | Homo sapiens |
| 2515 | 11736430_ | turquoise | nucleolar protein 8(NOL8)                                          | Homo sapiens |
| 2516 | 11736448_ | blue      | gypsy retrotransposon integrase 1(GIN1)                            | Homo sapiens |
| 2517 | 11736457_ | turquoise | potassium two pore domain channel subfamily K member 6(KCNK6)      | Homo sapiens |
| 2518 | 11736458_ | turquoise | potassium two pore domain channel subfamily K member 6(KCNK6)      | Homo sapiens |
| 2519 | 11736467_ | turquoise | T-cell activation RhoGTPase activating protein(TAGAP)              | Homo sapiens |
| 2520 | 11736499_ | turquoise | transmembrane protein 38A(TMEM38A)                                 | Homo sapiens |
| 2521 | 11736519_ | turquoise | chromosome X open reading frame 38(CXorf38)                        | Homo sapiens |
| 2522 | 11736526_ | turquoise | caspase recruitment domain family member 9(CARD9)                  | Homo sapiens |
| 2523 | 11736539_ | turquoise | RAB29, member RAS oncogene family(RAB29)                           | Homo sapiens |
| 2524 | 11736550_ | turquoise | RAB29, member RAS oncogene family(RAB29)                           | Homo sapiens |
| 2525 | 11736551_ | turquoise | REL proto-oncogene, NF-kB subunit(REL)                             | Homo sapiens |
| 2526 | 11736555_ | turquoise | solute carrier family 2 member 14(SLC2A14)                         | Homo sapiens |
| 2527 | 11736556_ | turquoise | solute carrier family 2 member 14(SLC2A14)                         | Homo sapiens |
| 2528 | 11736567_ | turquoise | lymphoid enhancer binding factor 1(LEF1)                           | Homo sapiens |
| 2529 | 11736568_ | turquoise | lymphoid enhancer binding factor 1(LEF1)                           | Homo sapiens |
| 2530 | 11736573_ | turquoise | protein kinase C delta(PRKCD)                                      | Homo sapiens |
| 2531 | 11736578_ | turquoise | adaptor related protein complex 1 gamma 2 subunit(AP1G2)           | Homo sapiens |
| 2532 | 11736581_ | turquoise | glucosaminyl (N-acetyl) transferase 1, core 2(GCNT1)               | Homo sapiens |
| 2533 | 11736589_ | blue      | de-etiolated homolog 1 (Arabidopsis)(DET1)                         | Homo sapiens |
| 2534 | 11736590_ | turquoise | receptor activity modifying protein 3(RAMP3)                       | Homo sapiens |
| 2535 | 11736594_ | turquoise | zinc finger and BTB domain containing 24(ZBTB24)                   | Homo sapiens |
| 2536 | 11736619_ | turquoise | aldehyde dehydrogenase 5 family member A1(ALDH5A1)                 | Homo sapiens |
| 2537 | 11736637_ | turquoise | DENN domain containing 4A(DENND4A)                                 | Homo sapiens |
| 2538 | 11736641_ | turquoise | mitochondrial trans-2-enoyl-CoA reductase(MECR)                    | Homo sapiens |
| 2539 | 11736683_ | turquoise | cytoplasmic FMR1 interacting protein 1(CYFIP1)                     | Homo sapiens |
| 2540 | 11736693_ | turquoise | tripartite motif containing 38(TRIM38)                             | Homo sapiens |
| 2541 | 11736694_ | turquoise | tripartite motif containing 38(TRIM38)                             | Homo sapiens |
| 2542 | 11736705_ | turquoise | HPS5, biogenesis of lysosomal organelles complex 2 subunit 2(HPS5) | Homo sapiens |
| 2543 | 11736710_ | turquoise | DENN domain containing 4A(DENND4A)                                 | Homo sapiens |
| 2544 | 11736742_ | turquoise | chromosome 1 open reading frame 168(C1orf168)                      | Homo sapiens |
| 2545 | 11736746_ | turquoise | ADAM metallopeptidase domain 28(ADAM28)                            | Homo sapiens |
| 2546 | 11736747_ | turquoise | ADAM metallopeptidase domain 28(ADAM28)                            | Homo sapiens |
| 2547 | 11736760_ | turquoise | FK506 binding protein 11(FKBP11)                                   | Homo sapiens |
| 2548 | 11736761_ | turquoise | caspase recruitment domain family member 16(CARD16)                | Homo sapiens |

|      |                    |                                                           |              |
|------|--------------------|-----------------------------------------------------------|--------------|
| 2549 | 11736770_blue      | ADAM metallopeptidase domain 23(ADAM23)                   | Homo sapiens |
| 2550 | 11736813_turquoise | programmed cell death 1 ligand 2(PDCD1LG2)                | Homo sapiens |
| 2551 | 11736831_turquoise | Sec23 homolog B, coat complex II component(SEC23B)        | Homo sapiens |
| 2552 | 11736877_blue      | DTW domain containing 2(DTWD2)                            | Homo sapiens |
| 2553 | 11736888_turquoise | integrin subunit alpha L(ITGAL)                           | Homo sapiens |
| 2554 | 11736965_blue      | F-box protein 40(FBXO40)                                  | Homo sapiens |
| 2555 | 11736973_turquoise | T-box 5(TBX5)                                             | Homo sapiens |
| 2556 | 11737026_turquoise | iroquois homeobox 4(IRX4)                                 | Homo sapiens |
| 2557 | 11737027_turquoise | fms related tyrosine kinase 3(FLT3)                       | Homo sapiens |
| 2558 | 11737038_turquoise | chromosome 19 open reading frame 38(C19orf38)             | Homo sapiens |
| 2559 | 11737050_turquoise | histamine receptor H1(HRH1)                               | Homo sapiens |
| 2560 | 11737058_turquoise | pantothenate kinase 2(PANK2)                              | Homo sapiens |
| 2561 | 11737131_turquoise | fat storage inducing transmembrane protein 2(FITM2)       | Homo sapiens |
| 2562 | 11737146_turquoise | suppressor of cytokine signaling 1(SOCS1)                 | Homo sapiens |
| 2563 | 11737147_turquoise | C-type lectin domain family 7 member A(CLEC7A)            | Homo sapiens |
| 2564 | 11737148_turquoise | C-type lectin domain family 7 member A(CLEC7A)            | Homo sapiens |
| 2565 | 11737160_turquoise | perilipin 5(PLIN5)                                        | Homo sapiens |
| 2566 | 11737171_turquoise | CD80 molecule(CD80)                                       | Homo sapiens |
| 2567 | 11737237_turquoise | eomesodermin(EOMES)                                       | Homo sapiens |
| 2568 | 11737238_turquoise | eomesodermin(EOMES)                                       | Homo sapiens |
| 2569 | 11737239_turquoise | eomesodermin(EOMES)                                       | Homo sapiens |
| 2570 | 11737243_blue      | fibronectin type III and SPRY domain containing 2(FSD2)   | Homo sapiens |
| 2571 | 11737250_turquoise | interleukin 1 receptor accessory protein like 1(IL1RAPL1) | Homo sapiens |
| 2572 | 11737256_turquoise | SP100 nuclear antigen(SP100)                              | Homo sapiens |
| 2573 | 11737309_brown     | chromosome 14 open reading frame 2(C14orf2)               | Homo sapiens |
| 2574 | 11737322_turquoise | phospholipase D1(PLD1)                                    | Homo sapiens |
| 2575 | 11737423_turquoise | NLR family pyrin domain containing 1(NLRP1)               | Homo sapiens |
| 2576 | 11737428_turquoise | macrophage scavenger receptor 1(MSR1)                     | Homo sapiens |
| 2577 | 11737429_turquoise | macrophage scavenger receptor 1(MSR1)                     | Homo sapiens |
| 2578 | 11737464_turquoise | interleukin 11 receptor subunit alpha(IL11RA)             | Homo sapiens |
| 2579 | 11737484_turquoise | chromosome 9 open reading frame 129(C9orf129)             | Homo sapiens |
| 2580 | 11737496_turquoise | CD200 receptor 1(CD200R1)                                 | Homo sapiens |
| 2581 | 11737504_turquoise | signal regulatory protein beta 2(SIRPB2)                  | Homo sapiens |
| 2582 | 11737511_turquoise | SP100 nuclear antigen(SP100)                              | Homo sapiens |
| 2583 | 11737555_turquoise | nudix hydrolase 17(NUDT17)                                | Homo sapiens |
| 2584 | 11737750_turquoise | serum/glucocorticoid regulated kinase 1(SGK1)             | Homo sapiens |
| 2585 | 11737757_turquoise | cysteinyl-tRNA synthetase(CARS)                           | Homo sapiens |
| 2586 | 11737758_turquoise | cysteinyl-tRNA synthetase(CARS)                           | Homo sapiens |
| 2587 | 11737770_turquoise | apolipoprotein L4(APOL4)                                  | Homo sapiens |
| 2588 | 11737791_turquoise | apolipoprotein L2(APOL2)                                  | Homo sapiens |
| 2589 | 11737811_blue      | nicotinamide nucleotide transhydrogenase(NNT)             | Homo sapiens |
| 2590 | 11737847_turquoise | major histocompatibility complex, class I-related(MR1)    | Homo sapiens |
| 2591 | 11737851_turquoise | protein phosphatase 1 regulatory subunit 18(PPP1R18)      | Homo sapiens |
| 2592 | 11737852_turquoise | protein phosphatase 1 regulatory subunit 18(PPP1R18)      | Homo sapiens |
| 2593 | 11737890_turquoise | linker for activation of T-cells family member 2(LAT2)    | Homo sapiens |
| 2594 | 11737907_turquoise | protein phosphatase 1 catalytic subunit alpha(PPP1CA)     | Homo sapiens |
| 2595 | 11737911_turquoise | G protein-coupled receptor 84(GPR84)                      | Homo sapiens |
| 2596 | 11737940_turquoise | receptor interacting serine/threonine kinase 1(RIPK1)     | Homo sapiens |
| 2597 | 11737952_turquoise | ral guanine nucleotide dissociation stimulator(RALGDS)    | Homo sapiens |
| 2598 | 11737975_turquoise | p21 (RAC1) activated kinase 6(PAK6)                       | Homo sapiens |

|      |                    |                                                                        |              |
|------|--------------------|------------------------------------------------------------------------|--------------|
| 2599 | 11737980_turquoise | DAN domain BMP antagonist family member 5(DAND5)                       | Homo sapiens |
| 2600 | 11738018_brown     | ARV1 homolog, fatty acid homeostasis modulator(ARV1)                   | Homo sapiens |
| 2601 | 11738021_turquoise | phospholipase C beta 4(PLCB4)                                          | Homo sapiens |
| 2602 | 11738053_turquoise | plasminogen activator, urokinase receptor(PLAUR)                       | Homo sapiens |
| 2603 | 11738054_blue      | integrin subunit beta 1 binding protein 2(ITGB1BP2)                    | Homo sapiens |
| 2604 | 11738124_turquoise | sialic acid binding Ig like lectin 10(SIGLEC10)                        | Homo sapiens |
| 2605 | 11738139_turquoise | kelch like family member 33(KLHL33)                                    | Homo sapiens |
| 2606 | 11738168_turquoise | basic leucine zipper ATF-like transcription factor 3(BATF3)            | Homo sapiens |
| 2607 | 11738183_turquoise | NLR family pyrin domain containing 3(NLRP3)                            | Homo sapiens |
| 2608 | 11738193_turquoise | paired like homeodomain 3(PITX3)                                       | Homo sapiens |
| 2609 | 11738202_turquoise | death domain associated protein(DAXX)                                  | Homo sapiens |
| 2610 | 11738203_turquoise | inosine monophosphate dehydrogenase 1(IMPDH1)                          | Homo sapiens |
| 2611 | 11738268_turquoise | family with sequence similarity 122C(FAM122C)                          | Homo sapiens |
| 2612 | 11738270_brown     | stress associated endoplasmic reticulum protein family member 2(SERP2) | Homo sapiens |
| 2613 | 11738335_turquoise | tumor protein p53(TP53)                                                | Homo sapiens |
| 2614 | 11738435_turquoise | CD74 molecule(CD74)                                                    | Homo sapiens |
| 2615 | 11738460_turquoise | NUT family member 2G(NUTM2G)                                           | Homo sapiens |
| 2616 | 11738516_turquoise | zinc finger CCHC-type containing 6(ZCCHC6)                             | Homo sapiens |
| 2617 | 11738523_turquoise | NLR family pyrin domain containing 3(NLRP3)                            | Homo sapiens |
| 2618 | 11738540_turquoise | HHIP like 1(HHIPL1)                                                    | Homo sapiens |
| 2619 | 11738656_turquoise | PARK2 coregulated(PACRG)                                               | Homo sapiens |
| 2620 | 11738799_turquoise | ninein(NIN)                                                            | Homo sapiens |
| 2621 | 11738807_turquoise | c-Maf inducing protein(CMIP)                                           | Homo sapiens |
| 2622 | 11738858_turquoise | colony stimulating factor 2 receptor alpha subunit(CSF2RA)             | Homo sapiens |
| 2623 | 11738863_turquoise | protein tyrosine phosphatase, non-receptor type 2(PTPN2)               | Homo sapiens |
| 2624 | 11738883_turquoise | tumor necrosis factor superfamily member 14(TNFSF14)                   | Homo sapiens |
| 2625 | 11738884_turquoise | caspase 1(CASP1)                                                       | Homo sapiens |
| 2626 | 11738900_turquoise | small nucleolar RNA, C/D box 139(SNORD139)                             | Homo sapiens |
| 2627 | 11738935_turquoise | killer cell lectin like receptor C3(KLRC3)                             | Homo sapiens |
| 2628 | 11738980_turquoise | CD4 molecule(CD4)                                                      | Homo sapiens |
| 2629 | 11738981_turquoise | CD4 molecule(CD4)                                                      | Homo sapiens |
| 2630 | 11738982_turquoise | CD4 molecule(CD4)                                                      | Homo sapiens |
| 2631 | 11739005_turquoise | capping actin protein of muscle Z-line alpha subunit 1(CAPZA1)         | Homo sapiens |
| 2632 | 11739006_turquoise | capping actin protein of muscle Z-line alpha subunit 1(CAPZA1)         | Homo sapiens |
| 2633 | 11739007_turquoise | capping actin protein of muscle Z-line alpha subunit 1(CAPZA1)         | Homo sapiens |
| 2634 | 11739008_turquoise | capping actin protein of muscle Z-line alpha subunit 1(CAPZA1)         | Homo sapiens |
| 2635 | 11739009_turquoise | myosin heavy chain 9(MYH9)                                             | Homo sapiens |
| 2636 | 11739019_turquoise | RAB5C, member RAS oncogene family(RAB5C)                               | Homo sapiens |
| 2637 | 11739024_turquoise | adenosine deaminase, RNA specific(ADAR)                                | Homo sapiens |
| 2638 | 11739028_turquoise | clathrin heavy chain(CLTC)                                             | Homo sapiens |
| 2639 | 11739031_turquoise | ARP2 actin related protein 2 homolog(ACTR2)                            | Homo sapiens |
| 2640 | 11739032_turquoise | ARP2 actin related protein 2 homolog(ACTR2)                            | Homo sapiens |
| 2641 | 11739043_turquoise | LIM domain kinase 2(LIMK2)                                             | Homo sapiens |
| 2642 | 11739046_turquoise | multimerin 2(MMRN2)                                                    | Homo sapiens |
| 2643 | 11739052_turquoise | solute carrier organic anion transporter family member 2B1(SLCO2B1)    | Homo sapiens |
| 2644 | 11739053_turquoise | solute carrier organic anion transporter family member 2B1(SLCO2B1)    | Homo sapiens |
| 2645 | 11739054_turquoise | protein tyrosine phosphatase, non-receptor type 6(PTPN6)               | Homo sapiens |
| 2646 | 11739055_turquoise | protein tyrosine phosphatase, non-receptor type 6(PTPN6)               | Homo sapiens |
| 2647 | 11739059_blue      | OCIA domain containing 1(OCIAD1)                                       | Homo sapiens |
| 2648 | 11739075_turquoise | nuclear factor, erythroid 2 like 1(NFE2L1)                             | Homo sapiens |

|      |                    |                                                                                      |              |
|------|--------------------|--------------------------------------------------------------------------------------|--------------|
| 2649 | 11739094_turquoise | C-X-C motif chemokine receptor 4(CXCR4)                                              | Homo sapiens |
| 2650 | 11739113_turquoise | ADP dependent glucokinase(ADPGK)                                                     | Homo sapiens |
| 2651 | 11739118_turquoise | canopy FGF signaling regulator 3(CNPY3)                                              | Homo sapiens |
| 2652 | 11739119_turquoise | canopy FGF signaling regulator 3(CNPY3)                                              | Homo sapiens |
| 2653 | 11739142_turquoise | heterogeneous nuclear ribonucleoprotein F(HNRNPF)                                    | Homo sapiens |
| 2654 | 11739148_turquoise | SAM and HD domain containing deoxynucleoside triphosphate triphosphohydrolase 1(S    | Homo sapiens |
| 2655 | 11739149_turquoise | SAM and HD domain containing deoxynucleoside triphosphate triphosphohydrolase 1(S    | Homo sapiens |
| 2656 | 11739157_turquoise | thioredoxin related transmembrane protein 4(TMx4)                                    | Homo sapiens |
| 2657 | 11739168_turquoise | GTPase, IMAP family member 6(GIMAP6)                                                 | Homo sapiens |
| 2658 | 11739201_brown     | ATP synthase, H+ transporting, mitochondrial Fo complex subunit C3 (subunit 9)(ATP5G | Homo sapiens |
| 2659 | 11739202_turquoise | ATP synthase, H+ transporting, mitochondrial Fo complex subunit C3 (subunit 9)(ATP5G | Homo sapiens |
| 2660 | 11739223_turquoise | neurofibromin 1 pseudogene 9(NF1P9)                                                  | Homo sapiens |
| 2661 | 11739230_turquoise | ADP ribosylation factor like GTPase 4A(ARL4A)                                        | Homo sapiens |
| 2662 | 11739232_turquoise | Ras association domain family member 2(RASSF2)                                       | Homo sapiens |
| 2663 | 11739262_turquoise | vacuolar protein sorting 4 homolog B(VPS4B)                                          | Homo sapiens |
| 2664 | 11739280_turquoise | C-X-C motif chemokine ligand 16(CXCL16)                                              | Homo sapiens |
| 2665 | 11739285_turquoise | ADP ribosylation factor like GTPase 6 interacting protein 6(ARL6IP6)                 | Homo sapiens |
| 2666 | 11739298_turquoise | LRR binding FLII interacting protein 1(LRRFIP1)                                      | Homo sapiens |
| 2667 | 11739300_brown     | CDGSH iron sulfur domain 3(CISD3)                                                    | Homo sapiens |
| 2668 | 11739334_turquoise | protein tyrosine phosphatase, receptor type C(PTPRC)                                 | Homo sapiens |
| 2669 | 11739345_blue      | calmegin(CLGN)                                                                       | Homo sapiens |
| 2670 | 11739346_turquoise | TNF receptor superfamily member 1A(TNFRSF1A)                                         | Homo sapiens |
| 2671 | 11739347_turquoise | phosphatidylinositol-5-phosphate 4-kinase type 2 alpha(PIP4K2A)                      | Homo sapiens |
| 2672 | 11739348_turquoise | phosphatidylinositol-5-phosphate 4-kinase type 2 alpha(PIP4K2A)                      | Homo sapiens |
| 2673 | 11739349_turquoise | angiominin(AMOT)                                                                     | Homo sapiens |
| 2674 | 11739364_turquoise | family with sequence similarity 92 member A(FAM92A)                                  | Homo sapiens |
| 2675 | 11739375_turquoise | synaptotagmin 7(SYT7)                                                                | Homo sapiens |
| 2676 | 11739392_turquoise | recombination signal binding protein for immunoglobulin kappa J region(RBPJ)         | Homo sapiens |
| 2677 | 11739400_turquoise | F-box protein 7(FBXO7)                                                               | Homo sapiens |
| 2678 | 11739401_turquoise | CD74 molecule(CD74)                                                                  | Homo sapiens |
| 2679 | 11739419_turquoise | uncharacterized LOC100130460(CAND1.11)                                               | Homo sapiens |
| 2680 | 11739437_blue      | PTC7 protein phosphatase homolog(PPTC7)                                              | Homo sapiens |
| 2681 | 11739452_turquoise | malic enzyme 2(ME2)                                                                  | Homo sapiens |
| 2682 | 11739453_blue      | malic enzyme 2(ME2)                                                                  | Homo sapiens |
| 2683 | 11739465_turquoise | alkB homolog 4, lysine demethylase(ALKBH4)                                           | Homo sapiens |
| 2684 | 11739470_turquoise | transmembrane protein 87B(TMEM87B)                                                   | Homo sapiens |
| 2685 | 11739482_turquoise | placenta specific 8(PLAC8)                                                           | Homo sapiens |
| 2686 | 11739484_turquoise | coiled-coil domain containing 88A(CCDC88A)                                           | Homo sapiens |
| 2687 | 11739487_turquoise | SUZ12 polycomb repressive complex 2 subunit(SUZ12)                                   | Homo sapiens |
| 2688 | 11739489_turquoise | ATPase phospholipid transporting 10D (putative)(ATP10D)                              | Homo sapiens |
| 2689 | 11739492_turquoise | mannosyl (alpha-1,3-)-glycoprotein beta-1,4-N-acetylglucosaminyltransferase, isozyme | Homo sapiens |
| 2690 | 11739493_turquoise | mannosyl (alpha-1,3-)-glycoprotein beta-1,4-N-acetylglucosaminyltransferase, isozyme | Homo sapiens |
| 2691 | 11739494_turquoise | mannosyl (alpha-1,3-)-glycoprotein beta-1,4-N-acetylglucosaminyltransferase, isozyme | Homo sapiens |
| 2692 | 11739501_blue      | desmoplakin(DSP)                                                                     | Homo sapiens |
| 2693 | 11739506_blue      | LON peptidase N-terminal domain and ring finger 2(LONRF2)                            | Homo sapiens |
| 2694 | 11739507_turquoise | PBX homeobox 3(PBX3)                                                                 | Homo sapiens |
| 2695 | 11739508_blue      | N(alpha)-acetyltransferase 30, NatC catalytic subunit(NAA30)                         | Homo sapiens |
| 2696 | 11739512_brown     | translocase of inner mitochondrial membrane 50(TIMM50)                               | Homo sapiens |
| 2697 | 11739521_turquoise | ST8 alpha-N-acetyl-neuraminide alpha-2,8-sialyltransferase 4(ST8SIA4)                | Homo sapiens |
| 2698 | 11739522_turquoise | ST8 alpha-N-acetyl-neuraminide alpha-2,8-sialyltransferase 4(ST8SIA4)                | Homo sapiens |



|      |                    |                                                                             |              |
|------|--------------------|-----------------------------------------------------------------------------|--------------|
| 2699 | 11739527_turquoise | secreted and transmembrane 1(SECTM1)                                        | Homo sapiens |
| 2700 | 11739557_turquoise | vesicle associated membrane protein 5(VAMP5)                                | Homo sapiens |
| 2701 | 11739558_turquoise | ring finger and WD repeat domain 3(RFWD3)                                   | Homo sapiens |
| 2702 | 11739576_turquoise | HPS5, biogenesis of lysosomal organelles complex 2 subunit 2(HPS5)          | Homo sapiens |
| 2703 | 11739581_turquoise | protein kinase D3(PRKD3)                                                    | Homo sapiens |
| 2704 | 11739583_turquoise | protein kinase D3(PRKD3)                                                    | Homo sapiens |
| 2705 | 11739584_turquoise | protein kinase D3(PRKD3)                                                    | Homo sapiens |
| 2706 | 11739586_turquoise | chloride voltage-gated channel 3(CLCN3)                                     | Homo sapiens |
| 2707 | 11739606_turquoise | coiled-coil domain containing 88A(CCDC88A)                                  | Homo sapiens |
| 2708 | 11739610_turquoise | calmodulin like 4(CALML4)                                                   | Homo sapiens |
| 2709 | 11739617_turquoise | CD44 molecule (Indian blood group)(CD44)                                    | Homo sapiens |
| 2710 | 11739654_turquoise | TNF receptor superfamily member 10a(TNFRSF10A)                              | Homo sapiens |
| 2711 | 11739657_turquoise | lymphotoxin beta(LTB)                                                       | Homo sapiens |
| 2712 | 11739658_turquoise | lymphotoxin beta(LTB)                                                       | Homo sapiens |
| 2713 | 11739666_turquoise | RUN and cysteine rich domain containing beclin 1 interacting protein(RUBCN) | Homo sapiens |
| 2714 | 11739667_turquoise | polypeptide N-acetylgalactosaminyltransferase 6(GALNT6)                     | Homo sapiens |
| 2715 | 11739670_turquoise | GRB2-related adaptor protein(GRAP)                                          | Homo sapiens |
| 2716 | 11739672_turquoise | zinc finger protein 253(ZNF253)                                             | Homo sapiens |
| 2717 | 11739681_turquoise | aryl hydrocarbon receptor(AHR)                                              | Homo sapiens |
| 2718 | 11739687_turquoise | family with sequence similarity 107 member B(FAM107B)                       | Homo sapiens |
| 2719 | 11739688_turquoise | family with sequence similarity 107 member B(FAM107B)                       | Homo sapiens |
| 2720 | 11739730_turquoise | casein kinase 1 gamma 1(CSNK1G1)                                            | Homo sapiens |
| 2721 | 11739731_turquoise | casein kinase 1 gamma 1(CSNK1G1)                                            | Homo sapiens |
| 2722 | 11739739_turquoise | interleukin 21 receptor(IL21R)                                              | Homo sapiens |
| 2723 | 11739740_turquoise | interleukin 21 receptor(IL21R)                                              | Homo sapiens |
| 2724 | 11739747_blue      | kelch like family member 7(KLHL7)                                           | Homo sapiens |
| 2725 | 11739753_turquoise | SLAM family member 8(SLAMF8)                                                | Homo sapiens |
| 2726 | 11739754_turquoise | SLAM family member 8(SLAMF8)                                                | Homo sapiens |
| 2727 | 11739767_turquoise | protein tyrosine phosphatase, receptor type E(PTPRE)                        | Homo sapiens |
| 2728 | 11739768_turquoise | protein tyrosine phosphatase, receptor type E(PTPRE)                        | Homo sapiens |
| 2729 | 11739796_turquoise | rhomoid 5 homolog 2(RHBDF2)                                                 | Homo sapiens |
| 2730 | 11739811_blue      | sirtuin 3(SIRT3)                                                            | Homo sapiens |
| 2731 | 11739825_turquoise | DnaJ heat shock protein family (Hsp40) member B12(DNAJB12)                  | Homo sapiens |
| 2732 | 11739828_turquoise | cystin 1(CYS1)                                                              | Homo sapiens |
| 2733 | 11739845_turquoise | macrophage scavenger receptor 1(MSR1)                                       | Homo sapiens |
| 2734 | 11739846_turquoise | macrophage scavenger receptor 1(MSR1)                                       | Homo sapiens |
| 2735 | 11739847_turquoise | macrophage scavenger receptor 1(MSR1)                                       | Homo sapiens |
| 2736 | 11739854_brown     | LYR motif containing 1(LYRM1)                                               | Homo sapiens |
| 2737 | 11739859_turquoise | protein kinase C and casein kinase substrate in neurons 1(PACSIN1)          | Homo sapiens |
| 2738 | 11739862_turquoise | integrator complex subunit 6 like(INTS6L)                                   | Homo sapiens |
| 2739 | 11739863_turquoise | transcription termination factor 2(TTF2)                                    | Homo sapiens |
| 2740 | 11739864_turquoise | transcription termination factor 2(TTF2)                                    | Homo sapiens |
| 2741 | 11739877_turquoise | basigin (Ok blood group)(BSG)                                               | Homo sapiens |
| 2742 | 11739911_brown     | pterin-4 alpha-carbinolamine dehydratase 2(PCBD2)                           | Homo sapiens |
| 2743 | 11739917_turquoise | casein kinase 1 delta(CSNK1D)                                               | Homo sapiens |
| 2744 | 11739941_turquoise | SUMO1/sentrin specific peptidase 1(SEN1)                                    | Homo sapiens |
| 2745 | 11739944_turquoise | neuroblastoma breakpoint family member 10(NBPF10)                           | Homo sapiens |
| 2746 | 11740006_turquoise | KIAA0895(KIAA0895)                                                          | Homo sapiens |
| 2747 | 11740035_turquoise | caspase recruitment domain family member 8(CARD8)                           | Homo sapiens |
| 2748 | 11740036_turquoise | caspase recruitment domain family member 8(CARD8)                           | Homo sapiens |

|      |                    |                                                                                |              |
|------|--------------------|--------------------------------------------------------------------------------|--------------|
| 2749 | 11740038_turquoise | ankyrin repeat domain 36(ANKRD36)                                              | Homo sapiens |
| 2750 | 11740043_blue      | mitochondrial methionyl-tRNA formyltransferase(MTFMT)                          | Homo sapiens |
| 2751 | 11740044_blue      | mitochondrial methionyl-tRNA formyltransferase(MTFMT)                          | Homo sapiens |
| 2752 | 11740061_turquoise | c-src tyrosine kinase(CSK)                                                     | Homo sapiens |
| 2753 | 11740065_turquoise | interleukin 17 receptor A(IL17RA)                                              | Homo sapiens |
| 2754 | 11740077_turquoise | discs large MAGUK scaffold protein 2(DLG2)                                     | Homo sapiens |
| 2755 | 11740080_turquoise | chromosome X open reading frame 21(CXorf21)                                    | Homo sapiens |
| 2756 | 11740144_turquoise | centrosomal protein 164(CEP164)                                                | Homo sapiens |
| 2757 | 11740145_turquoise | centrosomal protein 164(CEP164)                                                | Homo sapiens |
| 2758 | 11740162_turquoise | ArfGAP with RhoGAP domain, ankyrin repeat and PH domain 1(ARAP1)               | Homo sapiens |
| 2759 | 11740197_turquoise | isoprenoid synthase domain containing(ISP)                                     | Homo sapiens |
| 2760 | 11740212_turquoise | phosphatidylinositol-4,5-bisphosphate 3-kinase catalytic subunit gamma(PIK3CG) | Homo sapiens |
| 2761 | 11740238_turquoise | sulfatase 2(SULF2)                                                             | Homo sapiens |
| 2762 | 11740282_turquoise | tRNA splicing endonuclease subunit 2(TSEN2)                                    | Homo sapiens |
| 2763 | 11740302_turquoise | parvin gamma(PARVG)                                                            | Homo sapiens |
| 2764 | 11740370_turquoise | RAS guanyl releasing protein 1(RASGRP1)                                        | Homo sapiens |
| 2765 | 11740375_turquoise | regulator of G-protein signaling 10(RGS10)                                     | Homo sapiens |
| 2766 | 11740378_turquoise | aftiphilin(AFTPH)                                                              | Homo sapiens |
| 2767 | 11740390_turquoise | RNA binding motif protein 47(RBM47)                                            | Homo sapiens |
| 2768 | 11740393_turquoise | TNF receptor superfamily member 9(TNFRSF9)                                     | Homo sapiens |
| 2769 | 11740411_turquoise | protein kinase D2(PRKD2)                                                       | Homo sapiens |
| 2770 | 11740412_turquoise | protein kinase D2(PRKD2)                                                       | Homo sapiens |
| 2771 | 11740429_turquoise | 5'-3' exoribonuclease 1(XRN1)                                                  | Homo sapiens |
| 2772 | 11740444_turquoise | E74 like ETS transcription factor 1(ELF1)                                      | Homo sapiens |
| 2773 | 11740447_turquoise | butyrophilin subfamily 3 member A1(BTN3A1)                                     | Homo sapiens |
| 2774 | 11740450_turquoise | killer cell lectin like receptor D1(KLRD1)                                     | Homo sapiens |
| 2775 | 11740451_turquoise | killer cell lectin like receptor D1(KLRD1)                                     | Homo sapiens |
| 2776 | 11740452_turquoise | killer cell lectin like receptor D1(KLRD1)                                     | Homo sapiens |
| 2777 | 11740465_turquoise | G protein-coupled receptor 171(GPR171)                                         | Homo sapiens |
| 2778 | 11740486_turquoise | runt related transcription factor 3(RUNX3)                                     | Homo sapiens |
| 2779 | 11740499_turquoise | chromobox 5(CBX5)                                                              | Homo sapiens |
| 2780 | 11740513_blue      | phosphodiesterase 4D(PDE4D)                                                    | Homo sapiens |
| 2781 | 11740531_turquoise | C-type lectin domain family 10 member A(CLEC10A)                               | Homo sapiens |
| 2782 | 11740594_turquoise | histone cluster 1 H3 family member e(HIST1H3E)                                 | Homo sapiens |
| 2783 | 11740606_turquoise | hydroxylysine kinase(HYKK)                                                     | Homo sapiens |
| 2784 | 11740616_turquoise | parkin RBR E3 ubiquitin protein ligase(PARK2)                                  | Homo sapiens |
| 2785 | 11740617_turquoise | parkin RBR E3 ubiquitin protein ligase(PARK2)                                  | Homo sapiens |
| 2786 | 11740621_turquoise | lysine demethylase 2B(KDM2B)                                                   | Homo sapiens |
| 2787 | 11740657_turquoise | solute carrier family 22 member 5(SLC22A5)                                     | Homo sapiens |
| 2788 | 11740672_turquoise | COX15, cytochrome c oxidase assembly homolog(COX15)                            | Homo sapiens |
| 2789 | 11740677_turquoise | GDP dissociation inhibitor 2(GDI2)                                             | Homo sapiens |
| 2790 | 11740681_turquoise | TGFB induced factor homeobox 1(TGIF1)                                          | Homo sapiens |
| 2791 | 11740691_turquoise | allograft inflammatory factor 1(AIF1)                                          | Homo sapiens |
| 2792 | 11740745_blue      | OPA1, mitochondrial dynamin like GTPase(OPA1)                                  | Homo sapiens |
| 2793 | 11740746_blue      | OPA1, mitochondrial dynamin like GTPase(OPA1)                                  | Homo sapiens |
| 2794 | 11740748_turquoise | MYC associated factor X(MAX)                                                   | Homo sapiens |
| 2795 | 11740752_turquoise | folate receptor beta(FOLR2)                                                    | Homo sapiens |
| 2796 | 11740758_turquoise | mir-99a-let-7c cluster host gene(MIR99AHG)                                     | Homo sapiens |
| 2797 | 11740801_turquoise | acyl-CoA dehydrogenase family member 10(ACAD10)                                | Homo sapiens |
| 2798 | 11740821_turquoise | CD1e molecule(CD1E)                                                            | Homo sapiens |

|      |                    |                                                          |              |
|------|--------------------|----------------------------------------------------------|--------------|
| 2799 | 11740825_turquoise | thymus, brain and testes associated(TBATA)               | Homo sapiens |
| 2800 | 11740829_turquoise | synapse defective Rho GTPase homolog 2(SYDE2)            | Homo sapiens |
| 2801 | 11740871_turquoise | membrane spanning 4-domains A7(MS4A7)                    | Homo sapiens |
| 2802 | 11740872_turquoise | membrane spanning 4-domains A7(MS4A7)                    | Homo sapiens |
| 2803 | 11740873_turquoise | membrane spanning 4-domains A7(MS4A7)                    | Homo sapiens |
| 2804 | 11740874_turquoise | FES proto-oncogene, tyrosine kinase(FES)                 | Homo sapiens |
| 2805 | 11740879_turquoise | annexin A2(ANXA2)                                        | Homo sapiens |
| 2806 | 11740880_turquoise | annexin A2(ANXA2)                                        | Homo sapiens |
| 2807 | 11740881_turquoise | interleukin 15(IL15)                                     | Homo sapiens |
| 2808 | 11740885_turquoise | oxysterol binding protein like 3(OSBPL3)                 | Homo sapiens |
| 2809 | 11740890_turquoise | ADAM metallopeptidase domain 28(ADAM28)                  | Homo sapiens |
| 2810 | 11740891_turquoise | 2'-5'-oligoadenylate synthetase 1(OAS1)                  | Homo sapiens |
| 2811 | 11740934_turquoise | nucleolar and spindle associated protein 1(NUSAP1)       | Homo sapiens |
| 2812 | 11740937_turquoise | lipoic acid synthetase(LIAS)                             | Homo sapiens |
| 2813 | 11740938_turquoise | TGFB induced factor homeobox 1(TGIF1)                    | Homo sapiens |
| 2814 | 11740957_turquoise | solute carrier family 2 member 6(SLC2A6)                 | Homo sapiens |
| 2815 | 11740958_turquoise | centrosomal protein 63(CEP63)                            | Homo sapiens |
| 2816 | 11740961_turquoise | CD33 molecule(CD33)                                      | Homo sapiens |
| 2817 | 11740971_turquoise | Ras and Rab interactor like(RINL)                        | Homo sapiens |
| 2818 | 11740974_turquoise | cytoplasmic FMR1 interacting protein 1(CYFIP1)           | Homo sapiens |
| 2819 | 11740979_turquoise | LCK proto-oncogene, Src family tyrosine kinase(LCK)      | Homo sapiens |
| 2820 | 11740990_blue      | hyaluronoglucosaminidase 1(HYAL1)                        | Homo sapiens |
| 2821 | 11740992_turquoise | microRNA 6837(MIR6837)                                   | Homo sapiens |
| 2822 | 11740997_turquoise | TRAF-type zinc finger domain containing 1(TRAFF1)        | Homo sapiens |
| 2823 | 11740998_turquoise | diacylglycerol kinase alpha(DGKA)                        | Homo sapiens |
| 2824 | 11741016_turquoise | adaptor related protein complex 2 alpha 2 subunit(AP2A2) | Homo sapiens |
| 2825 | 11741030_turquoise | pentatricopeptide repeat domain 2(PTCD2)                 | Homo sapiens |
| 2826 | 11741031_brown     | HCLS1 associated protein X-1(HAX1)                       | Homo sapiens |
| 2827 | 11741035_turquoise | ribosomal protein S6 kinase A1(RPS6KA1)                  | Homo sapiens |
| 2828 | 11741039_blue      | death associated protein 3(DAP3)                         | Homo sapiens |
| 2829 | 11741040_blue      | death associated protein 3(DAP3)                         | Homo sapiens |
| 2830 | 11741047_turquoise | vav guanine nucleotide exchange factor 1(VAV1)           | Homo sapiens |
| 2831 | 11741063_turquoise | uncharacterized LOC101928143(LOC101928143)               | Homo sapiens |
| 2832 | 11741067_turquoise | sulfatase modifying factor 2(SUMF2)                      | Homo sapiens |
| 2833 | 11741076_turquoise | caspase 1(CASP1)                                         | Homo sapiens |
| 2834 | 11741121_turquoise | zinc finger protein 700(ZNF700)                          | Homo sapiens |
| 2835 | 11741126_turquoise | schlafen family member 11(SLFN11)                        | Homo sapiens |
| 2836 | 11741129_turquoise | calpain 2(CAPN2)                                         | Homo sapiens |
| 2837 | 11741133_turquoise | heterogeneous nuclear ribonucleoprotein F(HNRNPF)        | Homo sapiens |
| 2838 | 11741138_turquoise | gasdermin D(GSDMD)                                       | Homo sapiens |
| 2839 | 11741148_blue      | peroxiredoxin 2(PRX2)                                    | Homo sapiens |
| 2840 | 11741153_turquoise | neutrophil cytosolic factor 2(NCF2)                      | Homo sapiens |
| 2841 | 11741158_turquoise | renalase, FAD dependent amine oxidase(RNLS)              | Homo sapiens |
| 2842 | 11741184_turquoise | uncharacterized LOC100130460(CAND1.11)                   | Homo sapiens |
| 2843 | 11741187_turquoise | apolipoprotein L1(APOL1)                                 | Homo sapiens |
| 2844 | 11741190_turquoise | purinergic receptor P2Y10(P2RY10)                        | Homo sapiens |
| 2845 | 11741192_brown     | ribokinase(RBKS)                                         | Homo sapiens |
| 2846 | 11741195_turquoise | sialic acid binding Ig like lectin 14(SIGLEC14)          | Homo sapiens |
| 2847 | 11741202_turquoise | XIAP associated factor 1(XAF1)                           | Homo sapiens |
| 2848 | 11741226_turquoise | EYA transcriptional coactivator and phosphatase 1(EYA1)  | Homo sapiens |

|      |           |           |                                                                     |              |
|------|-----------|-----------|---------------------------------------------------------------------|--------------|
| 2849 | 11741229_ | turquoise | family with sequence similarity 111 member A(FAM111A)               | Homo sapiens |
| 2850 | 11741250_ | turquoise | SH2 domain containing 3C(SH2D3C)                                    | Homo sapiens |
| 2851 | 11741255_ | turquoise | apolipoprotein B mRNA editing enzyme catalytic subunit 3F(APOBEC3F) | Homo sapiens |
| 2852 | 11741257_ | turquoise | apolipoprotein B mRNA editing enzyme catalytic subunit 3F(APOBEC3F) | Homo sapiens |
| 2853 | 11741290_ | turquoise | tumor necrosis factor superfamily member 14(TNFSF14)                | Homo sapiens |
| 2854 | 11741309_ | turquoise | serine/threonine protein kinase 26(STK26)                           | Homo sapiens |
| 2855 | 11741319_ | turquoise | small nucleolar RNA, H/ACA box 29(SNORA29)                          | Homo sapiens |
| 2856 | 11741326_ | turquoise | endosulfine alpha(ENSA)                                             | Homo sapiens |
| 2857 | 11741365_ | brown     | intraflagellar transport 22(IFIT22)                                 | Homo sapiens |
| 2858 | 11741402_ | blue      | chromosome 21 open reading frame 33(C21orf33)                       | Homo sapiens |
| 2859 | 11741428_ | blue      | RNA binding protein, fox-1 homolog 1(RBFOX1)                        | Homo sapiens |
| 2860 | 11741435_ | turquoise | growth factor receptor bound protein 2(GRB2)                        | Homo sapiens |
| 2861 | 11741438_ | blue      | calmegin(CLGN)                                                      | Homo sapiens |
| 2862 | 11741477_ | turquoise | nephrocystin 1(NPHP1)                                               | Homo sapiens |
| 2863 | 11741493_ | turquoise | peroxisomal biogenesis factor 5(PEX5)                               | Homo sapiens |
| 2864 | 11741519_ | turquoise | CD14 molecule(CD14)                                                 | Homo sapiens |
| 2865 | 11741520_ | turquoise | CD14 molecule(CD14)                                                 | Homo sapiens |
| 2866 | 11741535_ | turquoise | transmembrane protein 2(TMEM2)                                      | Homo sapiens |
| 2867 | 11741536_ | turquoise | transmembrane protein 2(TMEM2)                                      | Homo sapiens |
| 2868 | 11741554_ | turquoise | caspase 8(CASP8)                                                    | Homo sapiens |
| 2869 | 11741555_ | turquoise | lipase A, lysosomal acid type(LIPA)                                 | Homo sapiens |
| 2870 | 11741567_ | turquoise | solute carrier organic anion transporter family member 2B1(SLCO2B1) | Homo sapiens |
| 2871 | 11741581_ | turquoise | synaptosome associated protein 23(SNAP23)                           | Homo sapiens |
| 2872 | 11741584_ | turquoise | ankyrin repeat and SOCS box containing 10(ASB10)                    | Homo sapiens |
| 2873 | 11741594_ | turquoise | leukocyte specific transcript 1(LST1)                               | Homo sapiens |
| 2874 | 11741605_ | turquoise | chromodomain helicase DNA binding protein 3(CHD3)                   | Homo sapiens |
| 2875 | 11741606_ | turquoise | chromodomain helicase DNA binding protein 3(CHD3)                   | Homo sapiens |
| 2876 | 11741619_ | turquoise | sodium voltage-gated channel alpha subunit 7(SCN7A)                 | Homo sapiens |
| 2877 | 11741632_ | turquoise | transporter 2, ATP binding cassette subfamily B member(TAP2)        | Homo sapiens |
| 2878 | 11741650_ | blue      | LDL receptor related protein 12(LRP12)                              | Homo sapiens |
| 2879 | 11741660_ | turquoise | T-cell activation RhoGTPase activating protein(TAGAP)               | Homo sapiens |
| 2880 | 11741667_ | turquoise | lymphocyte transmembrane adaptor 1(LAX1)                            | Homo sapiens |
| 2881 | 11741686_ | blue      | family with sequence similarity 185 member A(FAM185A)               | Homo sapiens |
| 2882 | 11741689_ | turquoise | sulfatase modifying factor 2(SUMF2)                                 | Homo sapiens |
| 2883 | 11741719_ | turquoise | adenosine deaminase, RNA specific(ADAR)                             | Homo sapiens |
| 2884 | 11741720_ | turquoise | adenosine deaminase, RNA specific(ADAR)                             | Homo sapiens |
| 2885 | 11741723_ | turquoise | DENN domain containing 2C(DENND2C)                                  | Homo sapiens |
| 2886 | 11741749_ | blue      | leucine rich repeat containing 2(LRRC2)                             | Homo sapiens |
| 2887 | 11741769_ | turquoise | sorting nexin family member 21(SNX21)                               | Homo sapiens |
| 2888 | 11741785_ | turquoise | SH3 domain binding kinase family member 2(SBK2)                     | Homo sapiens |
| 2889 | 11741789_ | brown     | NADH:ubiquinone oxidoreductase subunit B6(NDUFB6)                   | Homo sapiens |
| 2890 | 11741793_ | turquoise | fucose mutarotase(FUOM)                                             | Homo sapiens |
| 2891 | 11741796_ | turquoise | SH3 domain binding protein 2(SH3BP2)                                | Homo sapiens |
| 2892 | 11741797_ | turquoise | collagen type IV alpha 6 chain(COL4A6)                              | Homo sapiens |
| 2893 | 11741856_ | turquoise | zinc finger protein 658(ZNF658)                                     | Homo sapiens |
| 2894 | 11741860_ | turquoise | caveolin 3(CAV3)                                                    | Homo sapiens |
| 2895 | 11741870_ | turquoise | parkin RBR E3 ubiquitin protein ligase(PARK2)                       | Homo sapiens |
| 2896 | 11741878_ | turquoise | promyelocytic leukemia(PML)                                         | Homo sapiens |
| 2897 | 11741879_ | turquoise | promyelocytic leukemia(PML)                                         | Homo sapiens |
| 2898 | 11741885_ | turquoise | caspase 1(CASP1)                                                    | Homo sapiens |

|      |                    |                                                                  |              |
|------|--------------------|------------------------------------------------------------------|--------------|
| 2899 | 11741911_turquoise | guanylate binding protein 3(GBP3)                                | Homo sapiens |
| 2900 | 11741980_turquoise | dual specificity phosphatase 6(DUSP6)                            | Homo sapiens |
| 2901 | 11741981_turquoise | C-type lectin domain family 7 member A(CLEC7A)                   | Homo sapiens |
| 2902 | 11741990_turquoise | C-C motif chemokine receptor like 2(CCRL2)                       | Homo sapiens |
| 2903 | 11742022_turquoise | IKAROS family zinc finger 1(IKZF1)                               | Homo sapiens |
| 2904 | 11742027_turquoise | angiopoietin 2(ANGPT2)                                           | Homo sapiens |
| 2905 | 11742028_turquoise | angiopoietin 2(ANGPT2)                                           | Homo sapiens |
| 2906 | 11742035_blue      | phospholipase C like 1(PLCL1)                                    | Homo sapiens |
| 2907 | 11742042_turquoise | interleukin 1 receptor associated kinase 4(IRAK4)                | Homo sapiens |
| 2908 | 11742043_turquoise | CD44 molecule (Indian blood group)(CD44)                         | Homo sapiens |
| 2909 | 11742063_turquoise | butyrophilin subfamily 3 member A1(BTN3A1)                       | Homo sapiens |
| 2910 | 11742071_turquoise | RAB27A, member RAS oncogene family(RAB27A)                       | Homo sapiens |
| 2911 | 11742078_turquoise | family with sequence similarity 222 member A(FAM222A)            | Homo sapiens |
| 2912 | 11742107_turquoise | palmitoyl-protein thioesterase 1(PPT1)                           | Homo sapiens |
| 2913 | 11742116_turquoise | lactate dehydrogenase A(LDHA)                                    | Homo sapiens |
| 2914 | 11742119_turquoise | nuclear transcription factor Y subunit gamma(NFYC)               | Homo sapiens |
| 2915 | 11742173_turquoise | leukocyte specific transcript 1(LST1)                            | Homo sapiens |
| 2916 | 11742182_turquoise | POTE ankyrin domain family member E(POTEE)                       | Homo sapiens |
| 2917 | 11742191_turquoise | uncharacterized LOC100506403(LOC100506403)                       | Homo sapiens |
| 2918 | 11742216_turquoise | killer cell lectin like receptor D1(KLRD1)                       | Homo sapiens |
| 2919 | 11742217_turquoise | protein tyrosine phosphatase, receptor type A(PTPRA)             | Homo sapiens |
| 2920 | 11742241_turquoise | IKAROS family zinc finger 3(IKZF3)                               | Homo sapiens |
| 2921 | 11742273_blue      | brain and reproductive organ-expressed (TNFRSF1A modulator)(BRE) | Homo sapiens |
| 2922 | 11742282_turquoise | CD40 molecule(CD40)                                              | Homo sapiens |
| 2923 | 11742303_turquoise | aspartate beta-hydroxylase(ASPH)                                 | Homo sapiens |
| 2924 | 11742331_turquoise | ectodysplasin A(EDA)                                             | Homo sapiens |
| 2925 | 11742378_turquoise | aldo-keto reductase family 1 member B15(AKR1B15)                 | Homo sapiens |
| 2926 | 11742386_turquoise | caspase 1(CASP1)                                                 | Homo sapiens |
| 2927 | 11742439_turquoise | adenosine deaminase like(ADAL)                                   | Homo sapiens |
| 2928 | 11742449_turquoise | apolipoprotein L1(APOL1)                                         | Homo sapiens |
| 2929 | 11742456_turquoise | microRNA 4745(MIR4745)                                           | Homo sapiens |
| 2930 | 11742457_turquoise | microRNA 4745(MIR4745)                                           | Homo sapiens |
| 2931 | 11742482_turquoise | actin related protein 2/3 complex subunit 4(ARPC4)               | Homo sapiens |
| 2932 | 11742537_turquoise | BCL2 associated X, apoptosis regulator(BAX)                      | Homo sapiens |
| 2933 | 11742678_turquoise | microRNA 4745(MIR4745)                                           | Homo sapiens |
| 2934 | 11742680_turquoise | heterogeneous nuclear ribonucleoprotein A2/B1(HNRNPA2B1)         | Homo sapiens |
| 2935 | 11742681_turquoise | endoplasmic reticulum protein 29(ERP29)                          | Homo sapiens |
| 2936 | 11742686_turquoise | Fc fragment of IgG receptor and transporter(FCGRT)               | Homo sapiens |
| 2937 | 11742706_turquoise | RAB8A, member RAS oncogene family(RAB8A)                         | Homo sapiens |
| 2938 | 11742710_turquoise | serglycin(SRGN)                                                  | Homo sapiens |
| 2939 | 11742717_turquoise | transforming growth factor beta regulator 1(TBRG1)               | Homo sapiens |
| 2940 | 11742723_turquoise | signal transducer and activator of transcription 6(STAT6)        | Homo sapiens |
| 2941 | 11742724_turquoise | signal transducer and activator of transcription 6(STAT6)        | Homo sapiens |
| 2942 | 11742735_turquoise | nucleolar and spindle associated protein 1(NUSAP1)               | Homo sapiens |
| 2943 | 11742736_brown     | methylmalonyl-CoA epimerase(MCEE)                                | Homo sapiens |
| 2944 | 11742740_turquoise | gem nuclear organelle associated protein 5(GEMIN5)               | Homo sapiens |
| 2945 | 11742752_turquoise | ETS proto-oncogene 2, transcription factor(ETS2)                 | Homo sapiens |
| 2946 | 11742765_turquoise | regulator of G-protein signaling 1(RGS1)                         | Homo sapiens |
| 2947 | 11742784_turquoise | senataxin(SETX)                                                  | Homo sapiens |
| 2948 | 11742785_turquoise | senataxin(SETX)                                                  | Homo sapiens |

|      |                    |                                                                       |              |
|------|--------------------|-----------------------------------------------------------------------|--------------|
| 2949 | 11742798_blue      | chloride voltage-gated channel 3(CLCN3)                               | Homo sapiens |
| 2950 | 11742800_turquoise | E2F transcription factor 3(E2F3)                                      | Homo sapiens |
| 2951 | 11742832_turquoise | abnormal spindle microtubule assembly(ASPM)                           | Homo sapiens |
| 2952 | 11742833_turquoise | family with sequence similarity 149 member A(FAM149A)                 | Homo sapiens |
| 2953 | 11742838_turquoise | arrestin beta 1(ARRB1)                                                | Homo sapiens |
| 2954 | 11742849_turquoise | ral guanine nucleotide dissociation stimulator like 3(RGL3)           | Homo sapiens |
| 2955 | 11742850_turquoise | major histocompatibility complex, class II, DR alpha(HLA-DRA)         | Homo sapiens |
| 2956 | 11742859_turquoise | pleckstrin(PLEK)                                                      | Homo sapiens |
| 2957 | 11742863_turquoise | CD200 molecule(CD200)                                                 | Homo sapiens |
| 2958 | 11742870_turquoise | actin related protein 2/3 complex subunit 2(ARPC2)                    | Homo sapiens |
| 2959 | 11742881_turquoise | ubiquitin conjugating enzyme E2 B(UBE2B)                              | Homo sapiens |
| 2960 | 11742889_turquoise | F-box protein 6(FBXO6)                                                | Homo sapiens |
| 2961 | 11742892_turquoise | proteasome subunit alpha 4(PSMA4)                                     | Homo sapiens |
| 2962 | 11742904_turquoise | BCL2 associated athanogene 2(BAG2)                                    | Homo sapiens |
| 2963 | 11742905_turquoise | DnaJ heat shock protein family (Hsp40) member C1(DNAJC1)              | Homo sapiens |
| 2964 | 11742906_turquoise | DnaJ heat shock protein family (Hsp40) member C1(DNAJC1)              | Homo sapiens |
| 2965 | 11742911_turquoise | immunoglobulin superfamily member 6(IGSF6)                            | Homo sapiens |
| 2966 | 11742922_turquoise | lysosomal protein transmembrane 5(LAPTM5)                             | Homo sapiens |
| 2967 | 11742923_turquoise | lysosomal protein transmembrane 5(LAPTM5)                             | Homo sapiens |
| 2968 | 11742926_turquoise | carnitine palmitoyltransferase 2(CPT2)                                | Homo sapiens |
| 2969 | 11742943_blue      | creatine kinase, M-type(CKM)                                          | Homo sapiens |
| 2970 | 11742944_turquoise | coronin 1A(CORO1A)                                                    | Homo sapiens |
| 2971 | 11742948_turquoise | myristoylated alanine rich protein kinase C substrate(MARCKS)         | Homo sapiens |
| 2972 | 11742950_turquoise | CCR4-NOT transcription complex subunit 8(CNOT8)                       | Homo sapiens |
| 2973 | 11742964_turquoise | inositol 1,4,5-trisphosphate receptor type 3(ITPR3)                   | Homo sapiens |
| 2974 | 11742973_blue      | acetyl-CoA acetyltransferase 1(ACAT1)                                 | Homo sapiens |
| 2975 | 11742981_blue      | fatty acid binding protein 3(FABP3)                                   | Homo sapiens |
| 2976 | 11742985_turquoise | lymphocyte antigen 9(LY9)                                             | Homo sapiens |
| 2977 | 11742999_turquoise | peroxiredoxin 6(PRX6)                                                 | Homo sapiens |
| 2978 | 11743000_turquoise | CD83 molecule(CD83)                                                   | Homo sapiens |
| 2979 | 11743002_brown     | dynactin subunit 6(DCTN6)                                             | Homo sapiens |
| 2980 | 11743003_turquoise | cytochrome P450 family 4 subfamily B member 1(CYP4B1)                 | Homo sapiens |
| 2981 | 11743007_turquoise | NFKB inhibitor epsilon(NFKBIE)                                        | Homo sapiens |
| 2982 | 11743008_turquoise | uncharacterized LOC100505585(LOC100505585)                            | Homo sapiens |
| 2983 | 11743009_turquoise | uncharacterized LOC100505585(LOC100505585)                            | Homo sapiens |
| 2984 | 11743014_turquoise | disco interacting protein 2 homolog C(DIP2C)                          | Homo sapiens |
| 2985 | 11743015_blue      | disco interacting protein 2 homolog C(DIP2C)                          | Homo sapiens |
| 2986 | 11743016_turquoise | disco interacting protein 2 homolog C(DIP2C)                          | Homo sapiens |
| 2987 | 11743036_turquoise | spermidine/spermine N1-acetyltransferase 1(SAT1)                      | Homo sapiens |
| 2988 | 11743048_blue      | aconitase 2(ACO2)                                                     | Homo sapiens |
| 2989 | 11743055_turquoise | phospholipase A2 activating protein(PLAA)                             | Homo sapiens |
| 2990 | 11743062_turquoise | plasminogen activator, urokinase receptor(PLAUR)                      | Homo sapiens |
| 2991 | 11743063_turquoise | plasminogen activator, urokinase receptor(PLAUR)                      | Homo sapiens |
| 2992 | 11743065_turquoise | cell division cycle 6(CDC6)                                           | Homo sapiens |
| 2993 | 11743071_turquoise | lysophosphatidic acid receptor 6(LPAR6)                               | Homo sapiens |
| 2994 | 11743076_blue      | protein activator of interferon induced protein kinase EIF2AK2(PRKRA) | Homo sapiens |
| 2995 | 11743105_turquoise | pentatricopeptide repeat domain 3(PTCD3)                              | Homo sapiens |
| 2996 | 11743120_turquoise | SEN3-EIF4A1 readthrough (NMD candidate)(SEN3-EIF4A1)                  | Homo sapiens |
| 2997 | 11743127_turquoise | coiled-coil-helix-coiled-coil-helix domain containing 10(CHCHD10)     | Homo sapiens |
| 2998 | 11743129_turquoise | sortilin related receptor 1(SORL1)                                    | Homo sapiens |

|      |                    |                                                                |              |
|------|--------------------|----------------------------------------------------------------|--------------|
| 2999 | 11743130_turquoise | sortilin related receptor 1(SORL1)                             | Homo sapiens |
| 3000 | 11743157_turquoise | electron transfer flavoprotein dehydrogenase(ETFDH)            | Homo sapiens |
| 3001 | 11743166_turquoise | ETS variant 6(ETV6)                                            | Homo sapiens |
| 3002 | 11743167_turquoise | ETS variant 6(ETV6)                                            | Homo sapiens |
| 3003 | 11743168_turquoise | indoleamine 2,3-dioxygenase 1(IDO1)                            | Homo sapiens |
| 3004 | 11743169_turquoise | leupaxin(LPXN)                                                 | Homo sapiens |
| 3005 | 11743180_turquoise | nuclear protein, coactivator of histone transcription(NPAT)    | Homo sapiens |
| 3006 | 11743194_turquoise | TNF receptor superfamily member 14(TNFRSF14)                   | Homo sapiens |
| 3007 | 11743196_turquoise | toll like receptor 4(TLR4)                                     | Homo sapiens |
| 3008 | 11743197_turquoise | toll like receptor 4(TLR4)                                     | Homo sapiens |
| 3009 | 11743264_brown     | chromosome 14 open reading frame 2(C14orf2)                    | Homo sapiens |
| 3010 | 11743290_turquoise | polypeptide N-acetylgalactosaminyltransferase 1(GALNT1)        | Homo sapiens |
| 3011 | 11743299_turquoise | signal recognition particle 72(SRP72)                          | Homo sapiens |
| 3012 | 11743301_turquoise | signal recognition particle 72(SRP72)                          | Homo sapiens |
| 3013 | 11743321_turquoise | cathepsin O(CTSO)                                              | Homo sapiens |
| 3014 | 11743330_brown     | phosphoglycolate phosphatase(PGP)                              | Homo sapiens |
| 3015 | 11743332_turquoise | mitochondrial ribosomal protein L35(MRPL35)                    | Homo sapiens |
| 3016 | 11743333_turquoise | mitochondrial ribosomal protein L35(MRPL35)                    | Homo sapiens |
| 3017 | 11743334_turquoise | mitochondrial ribosomal protein L35(MRPL35)                    | Homo sapiens |
| 3018 | 11743348_turquoise | CD47 molecule(CD47)                                            | Homo sapiens |
| 3019 | 11743350_turquoise | chromosome 15 open reading frame 48(C15orf48)                  | Homo sapiens |
| 3020 | 11743352_turquoise | cordons-bleu WH2 repeat protein like 1(COBL1)                  | Homo sapiens |
| 3021 | 11743353_turquoise | signal transducer and activator of transcription 1(STAT1)      | Homo sapiens |
| 3022 | 11743361_turquoise | adenylosuccinate synthase(ADSS)                                | Homo sapiens |
| 3023 | 11743362_turquoise | adenylosuccinate synthase(ADSS)                                | Homo sapiens |
| 3024 | 11743377_turquoise | ninein(NIN)                                                    | Homo sapiens |
| 3025 | 11743379_turquoise | abl interactor 1(ABI1)                                         | Homo sapiens |
| 3026 | 11743386_turquoise | pre-mRNA processing factor 40 homolog A(PRP40A)                | Homo sapiens |
| 3027 | 11743394_turquoise | androgen induced 1(AIG1)                                       | Homo sapiens |
| 3028 | 11743406_turquoise | small integral membrane protein 14(SMIM14)                     | Homo sapiens |
| 3029 | 11743428_turquoise | runt related transcription factor 3(RUNX3)                     | Homo sapiens |
| 3030 | 11743433_turquoise | 6-phosphogluconolactonase(PGLS)                                | Homo sapiens |
| 3031 | 11743452_turquoise | cell division cycle associated 4(CDCA4)                        | Homo sapiens |
| 3032 | 11743458_turquoise | family with sequence similarity 49 member A(FAM49A)            | Homo sapiens |
| 3033 | 11743474_brown     | small integral membrane protein 4(SMIM4)                       | Homo sapiens |
| 3034 | 11743475_turquoise | integrin subunit alpha X(ITGAX)                                | Homo sapiens |
| 3035 | 11743501_turquoise | TNF receptor associated factor 3(TRAF3)                        | Homo sapiens |
| 3036 | 11743505_blue      | asparaginyl-tRNA synthetase 2, mitochondrial (putative)(NARS2) | Homo sapiens |
| 3037 | 11743517_blue      | nicotinamide nucleotide transhydrogenase(NNT)                  | Homo sapiens |
| 3038 | 11743530_turquoise | centromere protein K(CENPK)                                    | Homo sapiens |
| 3039 | 11743533_turquoise | RUN and FYVE domain containing 3(RUFY3)                        | Homo sapiens |
| 3040 | 11743555_turquoise | queuine tRNA-ribosyltransferase accessory subunit 2(QTRT2)     | Homo sapiens |
| 3041 | 11743559_turquoise | protein tyrosine phosphatase, receptor type C(PTPRC)           | Homo sapiens |
| 3042 | 11743560_turquoise | protein tyrosine phosphatase, receptor type C(PTPRC)           | Homo sapiens |
| 3043 | 11743561_turquoise | protein tyrosine phosphatase, receptor type C(PTPRC)           | Homo sapiens |
| 3044 | 11743570_turquoise | echinoderm microtubule associated protein like 1(EML1)         | Homo sapiens |
| 3045 | 11743581_turquoise | ARP2 actin related protein 2 homolog(ACTR2)                    | Homo sapiens |
| 3046 | 11743586_turquoise | poly(A) RNA polymerase D4, non-canonical(PAPD4)                | Homo sapiens |
| 3047 | 11743596_turquoise | protein tyrosine phosphatase, receptor type E(PTPRE)           | Homo sapiens |
| 3048 | 11743613_turquoise | tropomodulin 3(TMOD3)                                          | Homo sapiens |

|      |           |           |                                                                                 |              |
|------|-----------|-----------|---------------------------------------------------------------------------------|--------------|
| 3049 | 11743614_ | turquoise | ubiquitin specific peptidase 47(USP47)                                          | Homo sapiens |
| 3050 | 11743619_ | turquoise | dihydrouridine synthase 4 like(DUS4L)                                           | Homo sapiens |
| 3051 | 11743624_ | turquoise | translocase of inner mitochondrial membrane 22(TIMM22)                          | Homo sapiens |
| 3052 | 11743635_ | turquoise | zinc and ring finger 2(ZNRF2)                                                   | Homo sapiens |
| 3053 | 11743643_ | turquoise | dihydroorotate dehydrogenase (quinone)(DHODH)                                   | Homo sapiens |
| 3054 | 11743647_ | turquoise | high mobility group nucleosomal binding domain 4(HMGN4)                         | Homo sapiens |
| 3055 | 11743648_ | blue      | DDB1 and CUL4 associated factor 6(DCAF6)                                        | Homo sapiens |
| 3056 | 11743658_ | turquoise | H2A histone family member Y2(H2AFY2)                                            | Homo sapiens |
| 3057 | 11743677_ | turquoise | purinergic receptor P2Y8(P2RY8)                                                 | Homo sapiens |
| 3058 | 11743691_ | turquoise | mitochondrial ribosomal protein L30(MRPL30)                                     | Homo sapiens |
| 3059 | 11743704_ | turquoise | abhydrolase domain containing 11(ABHD11)                                        | Homo sapiens |
| 3060 | 11743709_ | turquoise | N(alpha)-acetyltransferase 15, NatA auxiliary subunit(NAA15)                    | Homo sapiens |
| 3061 | 11743722_ | turquoise | MARCKS like 1(MARCKSL1)                                                         | Homo sapiens |
| 3062 | 11743725_ | turquoise | major facilitator superfamily domain containing 1(MFSD1)                        | Homo sapiens |
| 3063 | 11743726_ | turquoise | ras homolog family member A(RHOA)                                               | Homo sapiens |
| 3064 | 11743728_ | blue      | coiled-coil domain containing 47(CCDC47)                                        | Homo sapiens |
| 3065 | 11743730_ | turquoise | tumor necrosis factor superfamily member 10(TNFSF10)                            | Homo sapiens |
| 3066 | 11743731_ | turquoise | tumor necrosis factor superfamily member 10(TNFSF10)                            | Homo sapiens |
| 3067 | 11743736_ | turquoise | motile sperm domain containing 2(MOSPD2)                                        | Homo sapiens |
| 3068 | 11743748_ | turquoise | linker for activation of T-cells(LAT)                                           | Homo sapiens |
| 3069 | 11743759_ | turquoise | CDC42 small effector 2(CDC42SE2)                                                | Homo sapiens |
| 3070 | 11743760_ | turquoise | CDC42 small effector 2(CDC42SE2)                                                | Homo sapiens |
| 3071 | 11743771_ | turquoise | GTPase, IMAP family member 7(GIMAP7)                                            | Homo sapiens |
| 3072 | 11743781_ | turquoise | 5'-3' exoribonuclease 1(XRN1)                                                   | Homo sapiens |
| 3073 | 11743808_ | turquoise | 7-dehydrocholesterol reductase(DHCR7)                                           | Homo sapiens |
| 3074 | 11743813_ | turquoise | ecotropic viral integration site 2B(EVI2B)                                      | Homo sapiens |
| 3075 | 11743824_ | turquoise | topoisomerase (DNA) II binding protein 1(TOPBP1)                                | Homo sapiens |
| 3076 | 11743841_ | turquoise | phosphatidylinositol specific phospholipase C X domain containing 2(PLCXD2)     | Homo sapiens |
| 3077 | 11743843_ | turquoise | DnaJ heat shock protein family (Hsp40) member C28(DNAJC28)                      | Homo sapiens |
| 3078 | 11743856_ | turquoise | collagen triple helix repeat containing 1(CTHRC1)                               | Homo sapiens |
| 3079 | 11743863_ | turquoise | ATPase plasma membrane Ca <sup>2+</sup> transporting 1(ATP2B1)                  | Homo sapiens |
| 3080 | 11743864_ | turquoise | ATPase plasma membrane Ca <sup>2+</sup> transporting 1(ATP2B1)                  | Homo sapiens |
| 3081 | 11743865_ | turquoise | ATPase plasma membrane Ca <sup>2+</sup> transporting 1(ATP2B1)                  | Homo sapiens |
| 3082 | 11743881_ | turquoise | melanoregulin(MREG)                                                             | Homo sapiens |
| 3083 | 11743887_ | blue      | S-phase response (cyclin related)(SPHAR)                                        | Homo sapiens |
| 3084 | 11743888_ | turquoise | zinc finger protein 10(ZNF10)                                                   | Homo sapiens |
| 3085 | 11743890_ | turquoise | zinc finger protein 10(ZNF10)                                                   | Homo sapiens |
| 3086 | 11743900_ | turquoise | class II major histocompatibility complex transactivator(CIITA)                 | Homo sapiens |
| 3087 | 11743911_ | turquoise | phospholipid scramblase 1(PLSCR1)                                               | Homo sapiens |
| 3088 | 11743915_ | turquoise | SEL1L family member 3(SEL1L3)                                                   | Homo sapiens |
| 3089 | 11743916_ | turquoise | NPC intracellular cholesterol transporter 1(NPC1)                               | Homo sapiens |
| 3090 | 11743931_ | turquoise | endoplasmic reticulum protein 29(ERP29)                                         | Homo sapiens |
| 3091 | 11743960_ | turquoise | microRNA 6787(MIR6787)                                                          | Homo sapiens |
| 3092 | 11743968_ | turquoise | cytochrome b-245 alpha chain(CYBA)                                              | Homo sapiens |
| 3093 | 11743979_ | blue      | ubiquinol-cytochrome c reductase core protein I(UQCRC1)                         | Homo sapiens |
| 3094 | 11743984_ | turquoise | A-kinase anchoring protein 1(AKAP1)                                             | Homo sapiens |
| 3095 | 11743985_ | turquoise | A-kinase anchoring protein 1(AKAP1)                                             | Homo sapiens |
| 3096 | 11743986_ | turquoise | A-kinase anchoring protein 1(AKAP1)                                             | Homo sapiens |
| 3097 | 11744000_ | turquoise | NFKB inhibitor alpha(NFKBIA)                                                    | Homo sapiens |
| 3098 | 11744002_ | turquoise | methylenetetrahydrofolate dehydrogenase (NADP+ dependent) 2, methenyltetrahydro | Homo sapiens |



|      |                    |                                                                                           |              |
|------|--------------------|-------------------------------------------------------------------------------------------|--------------|
| 3099 | 11744006_turquoise | vinculin(VCL)                                                                             | Homo sapiens |
| 3100 | 11744017_turquoise | fermitin family member 3(FERMT3)                                                          | Homo sapiens |
| 3101 | 11744020_turquoise | nucleoporin 210(NUP210)                                                                   | Homo sapiens |
| 3102 | 11744027_turquoise | transmembrane protein 181(TMEM181)                                                        | Homo sapiens |
| 3103 | 11744033_turquoise | S100 calcium binding protein A11(S100A11)                                                 | Homo sapiens |
| 3104 | 11744034_turquoise | vasodilator-stimulated phosphoprotein(VASP)                                               | Homo sapiens |
| 3105 | 11744037_turquoise | c-Maf inducing protein(CMIP)                                                              | Homo sapiens |
| 3106 | 11744040_brown     | cytochrome c oxidase assembly factor 3(COA3)                                              | Homo sapiens |
| 3107 | 11744054_turquoise | zinc finger NFX1-type containing 1(ZNFX1)                                                 | Homo sapiens |
| 3108 | 11744059_blue      | ubiquinol-cytochrome c reductase core protein II(UQCRC2)                                  | Homo sapiens |
| 3109 | 11744060_blue      | ubiquinol-cytochrome c reductase core protein II(UQCRC2)                                  | Homo sapiens |
| 3110 | 11744077_turquoise | actin related protein 2/3 complex subunit 1B(ARPC1B)                                      | Homo sapiens |
| 3111 | 11744082_turquoise | mitochondrial ribosomal protein S31(MRPS31)                                               | Homo sapiens |
| 3112 | 11744118_turquoise | mitochondrial ribosomal protein L10(MRPL10)                                               | Homo sapiens |
| 3113 | 11744119_turquoise | microRNA 6734(MIR6734)                                                                    | Homo sapiens |
| 3114 | 11744129_turquoise | myosin IXB(MYO9B)                                                                         | Homo sapiens |
| 3115 | 11744134_turquoise | zinc finger SWIM-type containing 6(ZSWIM6)                                                | Homo sapiens |
| 3116 | 11744137_turquoise | calcium/calmodulin dependent protein kinase ID(CAMK1D)                                    | Homo sapiens |
| 3117 | 11744138_turquoise | calcium/calmodulin dependent protein kinase ID(CAMK1D)                                    | Homo sapiens |
| 3118 | 11744148_brown     | solute carrier family 25 member 10(SLC25A10)                                              | Homo sapiens |
| 3119 | 11744149_turquoise | lipin 2(LPIN2)                                                                            | Homo sapiens |
| 3120 | 11744150_turquoise | lipin 2(LPIN2)                                                                            | Homo sapiens |
| 3121 | 11744151_turquoise | lipin 2(LPIN2)                                                                            | Homo sapiens |
| 3122 | 11744153_turquoise | reticulon 1(RTN1)                                                                         | Homo sapiens |
| 3123 | 11744156_turquoise | ribosomal protein S6 kinase A1(RPS6KA1)                                                   | Homo sapiens |
| 3124 | 11744162_turquoise | dual specificity phosphatase 4(DUSP4)                                                     | Homo sapiens |
| 3125 | 11744166_blue      | fumarate hydratase(FH)                                                                    | Homo sapiens |
| 3126 | 11744172_brown     | DnaJ heat shock protein family (Hsp40) member C4(DNAJC4)                                  | Homo sapiens |
| 3127 | 11744176_turquoise | protein phosphatase 1 regulatory subunit 9B(PPP1R9B)                                      | Homo sapiens |
| 3128 | 11744178_turquoise | chromosome 19 open reading frame 66(C19orf66)                                             | Homo sapiens |
| 3129 | 11744180_turquoise | T-cell immune regulator 1, ATPase H <sup>+</sup> transporting V0 subunit a3(TCIRG1)       | Homo sapiens |
| 3130 | 11744181_brown     | phenylalanyl-tRNA synthetase 2, mitochondrial(FARS2)                                      | Homo sapiens |
| 3131 | 11744182_blue      | phenylalanyl-tRNA synthetase 2, mitochondrial(FARS2)                                      | Homo sapiens |
| 3132 | 11744197_turquoise | myosin light chain 12B(MYL12B)                                                            | Homo sapiens |
| 3133 | 11744202_brown     | chromosome 19 open reading frame 70(C19orf70)                                             | Homo sapiens |
| 3134 | 11744207_brown     | isocitrate dehydrogenase 3 (NAD <sup>+</sup> ) beta(IDH3B)                                | Homo sapiens |
| 3135 | 11744209_turquoise | serpin family H member 1(SERPINH1)                                                        | Homo sapiens |
| 3136 | 11744214_turquoise | TRAF-type zinc finger domain containing 1(TRAFF1)                                         | Homo sapiens |
| 3137 | 11744215_turquoise | ring finger protein 149(RNF149)                                                           | Homo sapiens |
| 3138 | 11744222_brown     | ATP synthase, H <sup>+</sup> transporting, mitochondrial F1 complex, delta subunit(ATP5D) | Homo sapiens |
| 3139 | 11744223_brown     | ATP synthase, H <sup>+</sup> transporting, mitochondrial F1 complex, delta subunit(ATP5D) | Homo sapiens |
| 3140 | 11744227_brown     | MACRO domain containing 1(MACROD1)                                                        | Homo sapiens |
| 3141 | 11744236_turquoise | DEXD/H-box helicase 60(DDX60)                                                             | Homo sapiens |
| 3142 | 11744258_turquoise | ATPase Na <sup>+</sup> /K <sup>+</sup> transporting subunit beta 3(ATP1B3)                | Homo sapiens |
| 3143 | 11744259_turquoise | ATPase Na <sup>+</sup> /K <sup>+</sup> transporting subunit beta 3(ATP1B3)                | Homo sapiens |
| 3144 | 11744261_blue      | solute carrier family 25 member 11(SLC25A11)                                              | Homo sapiens |
| 3145 | 11744263_turquoise | ras-related C3 botulinum toxin substrate 2 (rho family, small GTP binding protein Rac2)   | Homo sapiens |
| 3146 | 11744273_turquoise | stem-loop binding protein(SLBP)                                                           | Homo sapiens |
| 3147 | 11744274_turquoise | NDC80, kinetochore complex component(NDC80)                                               | Homo sapiens |
| 3148 | 11744275_blue      | WD repeat domain 12(WDR12)                                                                | Homo sapiens |

|      |                    |                                                                     |              |
|------|--------------------|---------------------------------------------------------------------|--------------|
| 3149 | 11744276_turquoise | capping actin protein, gelsolin like(CAPG)                          | Homo sapiens |
| 3150 | 11744284_brown     | mitochondrial ribosomal protein S12(MRPS12)                         | Homo sapiens |
| 3151 | 11744300_turquoise | carbohydrate sulfotransferase 15(CHST15)                            | Homo sapiens |
| 3152 | 11744323_turquoise | PWWP domain containing 2A(PWWP2A)                                   | Homo sapiens |
| 3153 | 11744331_turquoise | complement factor B(CFB)                                            | Homo sapiens |
| 3154 | 11744345_turquoise | tubulin alpha 1b(TUBA1B)                                            | Homo sapiens |
| 3155 | 11744351_turquoise | NLR family pyrin domain containing 1(NLRP1)                         | Homo sapiens |
| 3156 | 11744353_turquoise | TatD DNase domain containing 2(TATDN2)                              | Homo sapiens |
| 3157 | 11744360_turquoise | reticulon 4(RTN4)                                                   | Homo sapiens |
| 3158 | 11744364_turquoise | inositol polyphosphate-5-phosphatase D(INPP5D)                      | Homo sapiens |
| 3159 | 11744374_turquoise | major histocompatibility complex, class II, DR beta 1(HLA-DRB1)     | Homo sapiens |
| 3160 | 11744384_brown     | up-regulated during skeletal muscle growth 5 homolog (mouse)(USMG5) | Homo sapiens |
| 3161 | 11744400_brown     | myosin light chain 6B(MYL6B)                                        | Homo sapiens |
| 3162 | 11744401_brown     | calmodulin binding transcription activator 1(CAMTA1)                | Homo sapiens |
| 3163 | 11744425_turquoise | KIAA0101(KIAA0101)                                                  | Homo sapiens |
| 3164 | 11744426_turquoise | KIAA0101(KIAA0101)                                                  | Homo sapiens |
| 3165 | 11744430_brown     | kinesin family member 9(KIF9)                                       | Homo sapiens |
| 3166 | 11744434_turquoise | poly(ADP-ribose) polymerase family member 9(PARP9)                  | Homo sapiens |
| 3167 | 11744435_turquoise | dual specificity phosphatase 6(DUSP6)                               | Homo sapiens |
| 3168 | 11744436_turquoise | microRNA 1178(MIR1178)                                              | Homo sapiens |
| 3169 | 11744441_turquoise | brain abundant membrane attached signal protein 1(BASP1)            | Homo sapiens |
| 3170 | 11744444_brown     | NADH:ubiquinone oxidoreductase subunit B10(NDUFB10)                 | Homo sapiens |
| 3171 | 11744449_turquoise | Rho GTPase activating protein 4(ARHGAP4)                            | Homo sapiens |
| 3172 | 11744450_turquoise | Rho GTPase activating protein 4(ARHGAP4)                            | Homo sapiens |
| 3173 | 11744455_brown     | ubiquinol-cytochrome c reductase hinge protein like(UQCRHL)         | Homo sapiens |
| 3174 | 11744462_blue      | PCI domain containing 2(PCID2)                                      | Homo sapiens |
| 3175 | 11744482_turquoise | transmembrane protein 246(TMEM246)                                  | Homo sapiens |
| 3176 | 11744484_turquoise | major histocompatibility complex, class II, DR alpha(HLA-DRA)       | Homo sapiens |
| 3177 | 11744485_turquoise | WD repeat domain 81(WDR81)                                          | Homo sapiens |
| 3178 | 11744486_turquoise | WD repeat domain 81(WDR81)                                          | Homo sapiens |
| 3179 | 11744495_turquoise | intraflagellar transport 46(IFT46)                                  | Homo sapiens |
| 3180 | 11744503_turquoise | arginine and serine rich protein 1(RSRP1)                           | Homo sapiens |
| 3181 | 11744512_turquoise | TraB domain containing 2A(TRABD2A)                                  | Homo sapiens |
| 3182 | 11744525_turquoise | mitochondrial transcription termination factor 2(MTERF2)            | Homo sapiens |
| 3183 | 11744545_brown     | GTF2I repeat domain containing 2B(GTF2IRD2B)                        | Homo sapiens |
| 3184 | 11744560_turquoise | microRNA 4723(MIR4723)                                              | Homo sapiens |
| 3185 | 11744562_turquoise | eva-1 homolog B(EVA1B)                                              | Homo sapiens |
| 3186 | 11744567_turquoise | CD72 molecule(CD72)                                                 | Homo sapiens |
| 3187 | 11744599_turquoise | nucleoporin 62(NUP62)                                               | Homo sapiens |
| 3188 | 11744608_turquoise | poly(ADP-ribose) polymerase family member 3(PARP3)                  | Homo sapiens |
| 3189 | 11744609_turquoise | ataxin 7(ATXN7)                                                     | Homo sapiens |
| 3190 | 11744611_turquoise | paternally expressed 3(PEG3)                                        | Homo sapiens |
| 3191 | 11744612_turquoise | NudC domain containing 1(NUDCD1)                                    | Homo sapiens |
| 3192 | 11744613_turquoise | solute carrier family 6 member 13(SLC6A13)                          | Homo sapiens |
| 3193 | 11744618_turquoise | dual specificity phosphatase 6(DUSP6)                               | Homo sapiens |
| 3194 | 11744632_blue      | COX11, cytochrome c oxidase copper chaperone(COX11)                 | Homo sapiens |
| 3195 | 11744638_turquoise | SND1 intronic transcript 1(SND1-IT1)                                | Homo sapiens |
| 3196 | 11744645_turquoise | transcobalamin 2(TCN2)                                              | Homo sapiens |
| 3197 | 11744652_turquoise | hyaluronan and proteoglycan link protein 2(HAPLN2)                  | Homo sapiens |
| 3198 | 11744654_turquoise | CD44 molecule (Indian blood group)(CD44)                            | Homo sapiens |

|      |                    |                                                                  |              |
|------|--------------------|------------------------------------------------------------------|--------------|
| 3199 | 11744660_turquoise | C-C motif chemokine ligand 4 like 1(CCL4L1)                      | Homo sapiens |
| 3200 | 11744663_turquoise | target of myb1 like 1 membrane trafficking protein(TOM1L1)       | Homo sapiens |
| 3201 | 11744672_brown     | MORN repeat containing 4(MORN4)                                  | Homo sapiens |
| 3202 | 11744673_turquoise | SP100 nuclear antigen(SP100)                                     | Homo sapiens |
| 3203 | 11744675_turquoise | family with sequence similarity 208 member A(FAM208A)            | Homo sapiens |
| 3204 | 11744699_turquoise | tyrosyl-DNA phosphodiesterase 1(TDP1)                            | Homo sapiens |
| 3205 | 11744700_turquoise | tyrosyl-DNA phosphodiesterase 1(TDP1)                            | Homo sapiens |
| 3206 | 11744715_turquoise | solute carrier family 38 member 6(SLC38A6)                       | Homo sapiens |
| 3207 | 11744717_turquoise | chromosome 18 open reading frame 8(C18orf8)                      | Homo sapiens |
| 3208 | 11744718_turquoise | collagen triple helix repeat containing 1(CTHRC1)                | Homo sapiens |
| 3209 | 11744728_turquoise | golgin A4(GOLGA4)                                                | Homo sapiens |
| 3210 | 11744735_turquoise | transmembrane protein 200A(TMEM200A)                             | Homo sapiens |
| 3211 | 11744749_turquoise | DnaJ heat shock protein family (Hsp40) member C11(DNAJC11)       | Homo sapiens |
| 3212 | 11744751_turquoise | serpin family B member 9(SERPINB9)                               | Homo sapiens |
| 3213 | 11744761_turquoise | uncharacterized LOC100505585(LOC100505585)                       | Homo sapiens |
| 3214 | 11744776_turquoise | nicotinamide N-methyltransferase(NNMT)                           | Homo sapiens |
| 3215 | 11744783_turquoise | SP100 nuclear antigen(SP100)                                     | Homo sapiens |
| 3216 | 11744786_turquoise | opioid growth factor receptor(OGFR)                              | Homo sapiens |
| 3217 | 11744789_turquoise | centromere protein U(CENPU)                                      | Homo sapiens |
| 3218 | 11744791_turquoise | fibronectin type III domain containing 5(FNDC5)                  | Homo sapiens |
| 3219 | 11744793_turquoise | DLG associated protein 5(DLGAP5)                                 | Homo sapiens |
| 3220 | 11744796_turquoise | DAB2, clathrin adaptor protein(DAB2)                             | Homo sapiens |
| 3221 | 11744797_turquoise | DAB2, clathrin adaptor protein(DAB2)                             | Homo sapiens |
| 3222 | 11744800_turquoise | fms related tyrosine kinase 3 ligand(FLT3LG)                     | Homo sapiens |
| 3223 | 11744809_turquoise | BORCS7-ASMT readthrough (NMD candidate)(BORCS7-ASMT)             | Homo sapiens |
| 3224 | 11744822_brown     | NADH:ubiquinone oxidoreductase subunit B2(NDUFB2)                | Homo sapiens |
| 3225 | 11744829_turquoise | major histocompatibility complex, class I, E(HLA-E)              | Homo sapiens |
| 3226 | 11744830_turquoise | nuclear pore complex interacting protein family member B5(NPIP5) | Homo sapiens |
| 3227 | 11744838_brown     | dual specificity phosphatase 28(DUSP28)                          | Homo sapiens |
| 3228 | 11744887_turquoise | zwilch kinetochore protein(ZWILCH)                               | Homo sapiens |
| 3229 | 11744888_turquoise | lamin B1(LMNB1)                                                  | Homo sapiens |
| 3230 | 11744889_turquoise | lamin B1(LMNB1)                                                  | Homo sapiens |
| 3231 | 11744896_turquoise | G-protein signaling modulator 3(GPSM3)                           | Homo sapiens |
| 3232 | 11744898_turquoise | proline rich coiled-coil 2C(PRRC2C)                              | Homo sapiens |
| 3233 | 11744901_blue      | NADH:ubiquinone oxidoreductase core subunit S1(NDUFS1)           | Homo sapiens |
| 3234 | 11744920_turquoise | outer dense fiber of sperm tails 3B(ODF3B)                       | Homo sapiens |
| 3235 | 11744940_turquoise | abhydrolase domain containing 17A(ABHD17A)                       | Homo sapiens |
| 3236 | 11744948_turquoise | semaphorin 3F(SEMA3F)                                            | Homo sapiens |
| 3237 | 11744953_turquoise | annexin A1(ANXA1)                                                | Homo sapiens |
| 3238 | 11744954_turquoise | annexin A1(ANXA1)                                                | Homo sapiens |
| 3239 | 11744955_turquoise | annexin A1(ANXA1)                                                | Homo sapiens |
| 3240 | 11744962_turquoise | ADP-ribosyltransferase 5(ART5)                                   | Homo sapiens |
| 3241 | 11744978_brown     | origin recognition complex subunit 4(ORC4)                       | Homo sapiens |
| 3242 | 11744991_turquoise | acetyl-CoA carboxylase beta(ACACB)                               | Homo sapiens |
| 3243 | 11744993_turquoise | sirtuin 7(SIRT7)                                                 | Homo sapiens |
| 3244 | 11744995_turquoise | pantothenate kinase 1(PANK1)                                     | Homo sapiens |
| 3245 | 11745015_turquoise | SP100 nuclear antigen(SP100)                                     | Homo sapiens |
| 3246 | 11745021_turquoise | v-myc avian myelocytomatosis viral oncogene homolog(MYC)         | Homo sapiens |
| 3247 | 11745063_turquoise | leucine rich repeat containing 8 family member B(LRRC8B)         | Homo sapiens |
| 3248 | 11745084_turquoise | family with sequence similarity 168 member B(FAM168B)            | Homo sapiens |

|      |                     |                                                                                    |              |
|------|---------------------|------------------------------------------------------------------------------------|--------------|
| 3249 | 11745105_ turquoise | meiotic double-stranded break formation protein 1(MEI1)                            | Homo sapiens |
| 3250 | 11745114_ turquoise | adhesion G protein-coupled receptor E2(ADGRE2)                                     | Homo sapiens |
| 3251 | 11745124_ brown     | 3-hydroxybutyrate dehydrogenase, type 1(BDH1)                                      | Homo sapiens |
| 3252 | 11745144_ turquoise | C-type lectin domain family 4 member E(CLEC4E)                                     | Homo sapiens |
| 3253 | 11745163_ blue      | hydroxyacyl-CoA dehydrogenase/3-ketoacyl-CoA thiolase/enoyl-CoA hydratase (trifunc | Homo sapiens |
| 3254 | 11745165_ turquoise | TRAF3 interacting protein 3(TRAF3IP3)                                              | Homo sapiens |
| 3255 | 11745171_ turquoise | diaphanous related formin 1(DIAPH1)                                                | Homo sapiens |
| 3256 | 11745185_ blue      | mitochondrial fission factor(MFF)                                                  | Homo sapiens |
| 3257 | 11745189_ turquoise | apolipoprotein L1(APOL1)                                                           | Homo sapiens |
| 3258 | 11745190_ turquoise | FUS RNA binding protein(FUS)                                                       | Homo sapiens |
| 3259 | 11745192_ turquoise | erythrocyte membrane protein band 4.1 like 3(EPB41L3)                              | Homo sapiens |
| 3260 | 11745230_ blue      | T-cell activation inhibitor, mitochondrial(TCAIM)                                  | Homo sapiens |
| 3261 | 11745232_ turquoise | N-6 adenine-specific DNA methyltransferase 1 (putative)(N6AMT1)                    | Homo sapiens |
| 3262 | 11745234_ turquoise | 3-hydroxyacyl-CoA dehydratase 4(HACD4)                                             | Homo sapiens |
| 3263 | 11745243_ turquoise | neuroblastoma breakpoint family member 11(NBPF11)                                  | Homo sapiens |
| 3264 | 11745244_ yellow    | microRNA 8071-1(MIR8071-1)                                                         | Homo sapiens |
| 3265 | 11745248_ turquoise | ilvB acetolactate synthase like(ILVBL)                                             | Homo sapiens |
| 3266 | 11745259_ brown     | chromosome 11 open reading frame 21(C11orf21)                                      | Homo sapiens |
| 3267 | 11745266_ turquoise | transporter 2, ATP binding cassette subfamily B member(TAP2)                       | Homo sapiens |
| 3268 | 11745268_ turquoise | tensin 1(TNS1)                                                                     | Homo sapiens |
| 3269 | 11745274_ turquoise | par-3 family cell polarity regulator(PARD3)                                        | Homo sapiens |
| 3270 | 11745276_ turquoise | sterol O-acyltransferase 1(SOAT1)                                                  | Homo sapiens |
| 3271 | 11745289_ turquoise | LIM domain and actin binding 1(LIMA1)                                              | Homo sapiens |
| 3272 | 11745302_ turquoise | StAR related lipid transfer domain containing 3(STARD3)                            | Homo sapiens |
| 3273 | 11745313_ turquoise | synergin gamma(SYNRG)                                                              | Homo sapiens |
| 3274 | 11745364_ turquoise | signal transducer and activator of transcription 5A(STAT5A)                        | Homo sapiens |
| 3275 | 11745376_ turquoise | apolipoprotein L6(APOL6)                                                           | Homo sapiens |
| 3276 | 11745384_ brown     | NADH:ubiquinone oxidoreductase subunit B4(NDUFB4)                                  | Homo sapiens |
| 3277 | 11745403_ turquoise | zinc finger protein 683(ZNF683)                                                    | Homo sapiens |
| 3278 | 11745406_ turquoise | MICAL like 2(MICALL2)                                                              | Homo sapiens |
| 3279 | 11745409_ turquoise | La ribonucleoprotein domain family member 1B(LARP1B)                               | Homo sapiens |
| 3280 | 11745415_ turquoise | diaphanous related formin 1(DIAPH1)                                                | Homo sapiens |
| 3281 | 11745421_ turquoise | BH3 interacting domain death agonist(BID)                                          | Homo sapiens |
| 3282 | 11745440_ turquoise | RELA proto-oncogene, NF-kB subunit(RELA)                                           | Homo sapiens |
| 3283 | 11745460_ brown     | NADH:ubiquinone oxidoreductase subunit V3(NDUFV3)                                  | Homo sapiens |
| 3284 | 11745462_ blue      | peroxiredoxin 2(PRX2)                                                              | Homo sapiens |
| 3285 | 11745468_ turquoise | gamma-aminobutyric acid type B receptor subunit 2(GABBR2)                          | Homo sapiens |
| 3286 | 11745471_ turquoise | zinc finger protein 276(ZNF276)                                                    | Homo sapiens |
| 3287 | 11745477_ turquoise | tweety family member 1(TTYH1)                                                      | Homo sapiens |
| 3288 | 11745479_ turquoise | glycerate kinase(GLYCK)                                                            | Homo sapiens |
| 3289 | 11745496_ turquoise | serine peptidase inhibitor, Kunitz type 2(SPINT2)                                  | Homo sapiens |
| 3290 | 11745498_ turquoise | interferon regulatory factor 3(IRF3)                                               | Homo sapiens |
| 3291 | 11745499_ turquoise | interferon regulatory factor 3(IRF3)                                               | Homo sapiens |
| 3292 | 11745500_ turquoise | C-type lectin domain family 10 member A(CLEC10A)                                   | Homo sapiens |
| 3293 | 11745501_ turquoise | endothelial cell surface expressed chemotaxis and apoptosis regulator(ESCR)        | Homo sapiens |
| 3294 | 11745509_ turquoise | IQ motif containing GTPase activating protein 2(IQGAP2)                            | Homo sapiens |
| 3295 | 11745517_ blue      | succinate dehydrogenase complex iron sulfur subunit B(SDHB)                        | Homo sapiens |
| 3296 | 11745524_ turquoise | catenin beta interacting protein 1(CTNNBIP1)                                       | Homo sapiens |
| 3297 | 11745527_ blue      | heat shock transcription factor 2(HSF2)                                            | Homo sapiens |
| 3298 | 11745537_ turquoise | nuclear factor of activated T-cells 3(NFATC3)                                      | Homo sapiens |

|      |                    |                                                                                 |              |
|------|--------------------|---------------------------------------------------------------------------------|--------------|
| 3299 | 11745555_brown     | chromosome 11 open reading frame 74(C11orf74)                                   | Homo sapiens |
| 3300 | 11745556_brown     | chromosome 11 open reading frame 74(C11orf74)                                   | Homo sapiens |
| 3301 | 11745560_turquoise | dedicator of cytokinesis 8(DOCK8)                                               | Homo sapiens |
| 3302 | 11745602_turquoise | clathrin light chain A(CLTA)                                                    | Homo sapiens |
| 3303 | 11745648_turquoise | eukaryotic translation elongation factor 1 alpha 1(EEF1A1)                      | Homo sapiens |
| 3304 | 11745737_turquoise | acyl-CoA dehydrogenase, very long chain(ACADVL)                                 | Homo sapiens |
| 3305 | 11745742_turquoise | FYVE, RhoGEF and PH domain containing 3(FGD3)                                   | Homo sapiens |
| 3306 | 11745772_turquoise | TNF receptor superfamily member 14(TNFRSF14)                                    | Homo sapiens |
| 3307 | 11745773_turquoise | TNF receptor superfamily member 14(TNFRSF14)                                    | Homo sapiens |
| 3308 | 11745775_turquoise | lipase A, lysosomal acid type(LIPA)                                             | Homo sapiens |
| 3309 | 11745801_turquoise | adenylate cyclase associated protein 1(CAP1)                                    | Homo sapiens |
| 3310 | 11745812_blue      | isocitrate dehydrogenase 3 (NAD(+)) beta(IDH3B)                                 | Homo sapiens |
| 3311 | 11745833_turquoise | epithelial cell transforming 2(ECT2)                                            | Homo sapiens |
| 3312 | 11745840_turquoise | progesterin and adipoQ receptor family member 8(PAQR8)                          | Homo sapiens |
| 3313 | 11745841_turquoise | CNDP dipeptidase 2 (metallopeptidase M20 family)(CNDP2)                         | Homo sapiens |
| 3314 | 11745854_turquoise | ring finger protein 145(RNF145)                                                 | Homo sapiens |
| 3315 | 11745858_blue      | ATP5S like(ATP5SL)                                                              | Homo sapiens |
| 3316 | 11745859_blue      | ATP5S like(ATP5SL)                                                              | Homo sapiens |
| 3317 | 11745860_turquoise | ATP5S like(ATP5SL)                                                              | Homo sapiens |
| 3318 | 11745869_blue      | mitochondrial pyruvate carrier 2(MPC2)                                          | Homo sapiens |
| 3319 | 11745884_turquoise | ubiquitin conjugating enzyme E2 Z(UBE2Z)                                        | Homo sapiens |
| 3320 | 11745892_turquoise | methylenetetrahydrofolate dehydrogenase (NADP+ dependent) 2, methenyltetrahydro | Homo sapiens |
| 3321 | 11745893_turquoise | methylenetetrahydrofolate dehydrogenase (NADP+ dependent) 2, methenyltetrahydro | Homo sapiens |
| 3322 | 11745894_turquoise | TNF receptor superfamily member 14(TNFRSF14)                                    | Homo sapiens |
| 3323 | 11745902_turquoise | NPC intracellular cholesterol transporter 2(NPC2)                               | Homo sapiens |
| 3324 | 11745903_turquoise | SLAM family member 7(SLAMF7)                                                    | Homo sapiens |
| 3325 | 11745912_turquoise | pellino E3 ubiquitin protein ligase 1(PELI1)                                    | Homo sapiens |
| 3326 | 11745922_turquoise | monoamine oxidase A(MAOA)                                                       | Homo sapiens |
| 3327 | 11745923_turquoise | monoamine oxidase A(MAOA)                                                       | Homo sapiens |
| 3328 | 11745926_turquoise | ADAM metallopeptidase domain 15(ADAM15)                                         | Homo sapiens |
| 3329 | 11745927_turquoise | ADAM metallopeptidase domain 15(ADAM15)                                         | Homo sapiens |
| 3330 | 11745930_turquoise | p21 (RAC1) activated kinase 6(PAK6)                                             | Homo sapiens |
| 3331 | 11745932_turquoise | thymosin beta 10(TMSB10)                                                        | Homo sapiens |
| 3332 | 11745936_turquoise | solute carrier family 50 member 1(SLC50A1)                                      | Homo sapiens |
| 3333 | 11745938_turquoise | absent in melanoma 1(AIM1)                                                      | Homo sapiens |
| 3334 | 11745988_turquoise | ADP dependent glucokinase(ADPGK)                                                | Homo sapiens |
| 3335 | 11745989_turquoise | major histocompatibility complex, class II, DM alpha(HLA-DMA)                   | Homo sapiens |
| 3336 | 11745991_turquoise | UV radiation resistance associated(UVRAG)                                       | Homo sapiens |
| 3337 | 11745998_turquoise | zinc finger protein 252, pseudogene(ZNF252P)                                    | Homo sapiens |
| 3338 | 11746002_turquoise | caspase 4(CASP4)                                                                | Homo sapiens |
| 3339 | 11746003_turquoise | DNA polymerase delta interacting protein 2(POLDIP2)                             | Homo sapiens |
| 3340 | 11746014_turquoise | neutrophil cytosolic factor 1(NCF1)                                             | Homo sapiens |
| 3341 | 11746027_turquoise | N-myc and STAT interactor(NMI)                                                  | Homo sapiens |
| 3342 | 11746028_turquoise | N-myc and STAT interactor(NMI)                                                  | Homo sapiens |
| 3343 | 11746041_turquoise | transformer 2 beta homolog (Drosophila)(TRA2B)                                  | Homo sapiens |
| 3344 | 11746042_turquoise | transformer 2 beta homolog (Drosophila)(TRA2B)                                  | Homo sapiens |
| 3345 | 11746048_turquoise | adenosine deaminase like(ADAL)                                                  | Homo sapiens |
| 3346 | 11746053_turquoise | uncharacterized LOC100996740(LOC100996740)                                      | Homo sapiens |
| 3347 | 11746060_turquoise | TNF alpha induced protein 2(TNFAIP2)                                            | Homo sapiens |
| 3348 | 11746079_turquoise | adenylate cyclase 7(ADCY7)                                                      | Homo sapiens |

|      |                    |                                                                       |              |
|------|--------------------|-----------------------------------------------------------------------|--------------|
| 3349 | 11746084_blue      | protein-L-isoaspartate (D-aspartate) O-methyltransferase(PCMT1)       | Homo sapiens |
| 3350 | 11746087_turquoise | CD84 molecule(CD84)                                                   | Homo sapiens |
| 3351 | 11746088_turquoise | interferon induced protein 44(IFI44)                                  | Homo sapiens |
| 3352 | 11746092_turquoise | rogdi homolog(ROGDI)                                                  | Homo sapiens |
| 3353 | 11746135_turquoise | microRNA 1292(MIR1292)                                                | Homo sapiens |
| 3354 | 11746149_turquoise | butyrylcholinesterase(BCHE)                                           | Homo sapiens |
| 3355 | 11746155_turquoise | interferon regulatory factor 9(IRF9)                                  | Homo sapiens |
| 3356 | 11746156_turquoise | interferon regulatory factor 9(IRF9)                                  | Homo sapiens |
| 3357 | 11746159_turquoise | PBX homeobox 3(PBX3)                                                  | Homo sapiens |
| 3358 | 11746162_turquoise | family with sequence similarity 49 member B(FAM49B)                   | Homo sapiens |
| 3359 | 11746175_turquoise | apolipoprotein L4(APOL4)                                              | Homo sapiens |
| 3360 | 11746217_turquoise | HPS3, biogenesis of lysosomal organelles complex 2 subunit 1(HPS3)    | Homo sapiens |
| 3361 | 11746242_turquoise | aryl hydrocarbon receptor nuclear translocator like 2(ARNTL2)         | Homo sapiens |
| 3362 | 11746251_turquoise | chloride intracellular channel 1(CLIC1)                               | Homo sapiens |
| 3363 | 11746269_turquoise | abhydrolase domain containing 3(ABHD3)                                | Homo sapiens |
| 3364 | 11746273_turquoise | dihydrouridine synthase 4 like(DUS4L)                                 | Homo sapiens |
| 3365 | 11746286_turquoise | butyrophilin subfamily 3 member A2(BTN3A2)                            | Homo sapiens |
| 3366 | 11746309_turquoise | solute carrier family 15 member 3(SLC15A3)                            | Homo sapiens |
| 3367 | 11746321_turquoise | serpin family H member 1(SERPINH1)                                    | Homo sapiens |
| 3368 | 11746331_brown     | adenosine kinase(ADK)                                                 | Homo sapiens |
| 3369 | 11746340_turquoise | nucleolar protein 8(NOL8)                                             | Homo sapiens |
| 3370 | 11746347_turquoise | beta-1,3-glucuronyltransferase 3(B3GAT3)                              | Homo sapiens |
| 3371 | 11746350_turquoise | Pim-1 proto-oncogene, serine/threonine kinase(PIM1)                   | Homo sapiens |
| 3372 | 11746370_turquoise | ectonucleoside triphosphate diphosphohydrolase 6 (putative)(ENTPD6)   | Homo sapiens |
| 3373 | 11746372_brown     | nudix hydrolase 6(NUDT6)                                              | Homo sapiens |
| 3374 | 11746376_turquoise | interleukin 16(IL16)                                                  | Homo sapiens |
| 3375 | 11746400_turquoise | myosin light chain kinase 3(MYLK3)                                    | Homo sapiens |
| 3376 | 11746407_turquoise | toll like receptor 10(TLR10)                                          | Homo sapiens |
| 3377 | 11746414_turquoise | family with sequence similarity 107 member B(FAM107B)                 | Homo sapiens |
| 3378 | 11746418_turquoise | vitrin(VIT)                                                           | Homo sapiens |
| 3379 | 11746439_turquoise | glyoxalase I(GLO1)                                                    | Homo sapiens |
| 3380 | 11746449_turquoise | Meis homeobox 2(MEIS2)                                                | Homo sapiens |
| 3381 | 11746450_turquoise | Meis homeobox 2(MEIS2)                                                | Homo sapiens |
| 3382 | 11746465_turquoise | epidermal growth factor receptor pathway substrate 15 like 1(EPS15L1) | Homo sapiens |
| 3383 | 11746516_turquoise | ADAM metallopeptidase domain 15(ADAM15)                               | Homo sapiens |
| 3384 | 11746524_turquoise | family with sequence similarity 81 member A(FAM81A)                   | Homo sapiens |
| 3385 | 11746529_turquoise | TNF receptor superfamily member 14(TNFRSF14)                          | Homo sapiens |
| 3386 | 11746557_turquoise | galectin 9B(LGALS9B)                                                  | Homo sapiens |
| 3387 | 11746558_turquoise | galectin 9(LGALS9)                                                    | Homo sapiens |
| 3388 | 11746568_turquoise | hypoxia inducible factor 3 alpha subunit(HIF3A)                       | Homo sapiens |
| 3389 | 11746584_turquoise | metal response element binding transcription factor 2(MTF2)           | Homo sapiens |
| 3390 | 11746586_brown     | NADH:ubiquinone oxidoreductase core subunit S7(NDUFS7)                | Homo sapiens |
| 3391 | 11746596_turquoise | NAD kinase(NADK)                                                      | Homo sapiens |
| 3392 | 11746609_turquoise | cullin associated and neddylation dissociated 2 (putative)(CAND2)     | Homo sapiens |
| 3393 | 11746626_turquoise | hydroxyacylglutathione hydrolase(HAGH)                                | Homo sapiens |
| 3394 | 11746631_turquoise | centrosomal protein 41(CEP41)                                         | Homo sapiens |
| 3395 | 11746635_turquoise | lymphoid enhancer binding factor 1(LEF1)                              | Homo sapiens |
| 3396 | 11746638_turquoise | dehydrogenase/reductase 11(DHRS11)                                    | Homo sapiens |
| 3397 | 11746639_turquoise | Ras association domain family member 2(RASSF2)                        | Homo sapiens |
| 3398 | 11746655_blue      | acetyl-CoA acyltransferase 1(ACAA1)                                   | Homo sapiens |

|      |                    |                                                                         |              |
|------|--------------------|-------------------------------------------------------------------------|--------------|
| 3399 | 11746658_turquoise | CD86 molecule(CD86)                                                     | Homo sapiens |
| 3400 | 11746659_turquoise | nuclear receptor subfamily 2 group F member 6(NR2F6)                    | Homo sapiens |
| 3401 | 11746686_turquoise | G kinase anchoring protein 1(GKAP1)                                     | Homo sapiens |
| 3402 | 11746692_turquoise | bromodomain adjacent to zinc finger domain 1A(BAZ1A)                    | Homo sapiens |
| 3403 | 11746705_turquoise | regulator of G-protein signaling 16(RGS16)                              | Homo sapiens |
| 3404 | 11746710_turquoise | dedicator of cytokinesis 10(DOCK10)                                     | Homo sapiens |
| 3405 | 11746729_turquoise | lymphoid restricted membrane protein(LRMP)                              | Homo sapiens |
| 3406 | 11746736_turquoise | calcium voltage-gated channel auxiliary subunit alpha2delta 3(CACNA2D3) | Homo sapiens |
| 3407 | 11746767_turquoise | integrin subunit alpha 4(ITGA4)                                         | Homo sapiens |
| 3408 | 11746778_turquoise | intersectin 1(ITSN1)                                                    | Homo sapiens |
| 3409 | 11746779_turquoise | nuclear receptor coactivator 7(NCOA7)                                   | Homo sapiens |
| 3410 | 11746804_turquoise | major histocompatibility complex, class II, DQ beta 1(HLA-DQB1)         | Homo sapiens |
| 3411 | 11746844_blue      | transmembrane protein 143(TMEM143)                                      | Homo sapiens |
| 3412 | 11746845_blue      | transmembrane protein 143(TMEM143)                                      | Homo sapiens |
| 3413 | 11746855_brown     | NAD(P)HX epimerase(NAXE)                                                | Homo sapiens |
| 3414 | 11746868_turquoise | GIT ArfGAP 2(GIT2)                                                      | Homo sapiens |
| 3415 | 11746874_turquoise | G protein subunit alpha i2(GNAI2)                                       | Homo sapiens |
| 3416 | 11746875_turquoise | G protein subunit alpha i2(GNAI2)                                       | Homo sapiens |
| 3417 | 11746878_turquoise | inhibitor of DNA binding 2, HLH protein(ID2)                            | Homo sapiens |
| 3418 | 11746880_turquoise | filamin A(FLNA)                                                         | Homo sapiens |
| 3419 | 11746906_turquoise | caspase recruitment domain family member 8(CARD8)                       | Homo sapiens |
| 3420 | 11746918_blue      | L-2-hydroxyglutarate dehydrogenase(L2HGDH)                              | Homo sapiens |
| 3421 | 11746935_turquoise | tryptophanyl tRNA synthetase 2, mitochondrial(WARS2)                    | Homo sapiens |
| 3422 | 11746954_turquoise | C-C motif chemokine ligand 4 like 1(CCL4L1)                             | Homo sapiens |
| 3423 | 11746961_turquoise | major histocompatibility complex, class II, DM beta(HLA-DMB)            | Homo sapiens |
| 3424 | 11746962_turquoise | major histocompatibility complex, class II, DM beta(HLA-DMB)            | Homo sapiens |
| 3425 | 11746965_turquoise | alanyl aminopeptidase, membrane(ANPEP)                                  | Homo sapiens |
| 3426 | 11746972_turquoise | membrane associated ring-CH-type finger 1(MARCH1)                       | Homo sapiens |
| 3427 | 11746995_turquoise | N-acetylneuraminatase pyruvate lyase(NPL)                               | Homo sapiens |
| 3428 | 11747004_turquoise | sulfite oxidase(SUOX)                                                   | Homo sapiens |
| 3429 | 11747013_blue      | pyrophosphatase (inorganic) 2(PPA2)                                     | Homo sapiens |
| 3430 | 11747019_turquoise | Rho GTPase activating protein 45(ARHGAP45)                              | Homo sapiens |
| 3431 | 11747020_turquoise | Rho GTPase activating protein 45(ARHGAP45)                              | Homo sapiens |
| 3432 | 11747076_turquoise | microRNA 6837(MIR6837)                                                  | Homo sapiens |
| 3433 | 11747077_turquoise | eukaryotic translation elongation factor 1 alpha 1(EEF1A1)              | Homo sapiens |
| 3434 | 11747086_turquoise | granulysin(GCA)                                                         | Homo sapiens |
| 3435 | 11747110_turquoise | PAS domain containing serine/threonine kinase(PASK)                     | Homo sapiens |
| 3436 | 11747113_turquoise | CD160 molecule(CD160)                                                   | Homo sapiens |
| 3437 | 11747126_blue      | ADP-ribosyltransferase 3(ART3)                                          | Homo sapiens |
| 3438 | 11747135_turquoise | centriolin(CNTRL)                                                       | Homo sapiens |
| 3439 | 11747137_turquoise | endoplasmic reticulum aminopeptidase 2(ERAP2)                           | Homo sapiens |
| 3440 | 11747147_turquoise | protein phosphatase 2 scaffold subunit Abeta(PPP2R1B)                   | Homo sapiens |
| 3441 | 11747189_turquoise | B-cell CLL/lymphoma 11A(BCL11A)                                         | Homo sapiens |
| 3442 | 11747190_turquoise | FCH and double SH3 domains 1(FCHSD1)                                    | Homo sapiens |
| 3443 | 11747212_turquoise | zinc finger protein 174(ZNF174)                                         | Homo sapiens |
| 3444 | 11747230_turquoise | BUB1 mitotic checkpoint serine/threonine kinase(BUB1)                   | Homo sapiens |
| 3445 | 11747247_turquoise | RAP1B, member of RAS oncogene family(RAP1B)                             | Homo sapiens |
| 3446 | 11747249_turquoise | adenylosuccinate synthase(ADSS)                                         | Homo sapiens |
| 3447 | 11747276_turquoise | A-kinase anchoring protein 1(AKAP1)                                     | Homo sapiens |
| 3448 | 11747278_brown     | malate dehydrogenase 2(MDH2)                                            | Homo sapiens |

|      |                    |                                                                     |              |
|------|--------------------|---------------------------------------------------------------------|--------------|
| 3449 | 11747282_turquoise | annexin A2 pseudogene 2(ANXA2P2)                                    | Homo sapiens |
| 3450 | 11747285_turquoise | target of myb1 like 1 membrane trafficking protein(TOM1L1)          | Homo sapiens |
| 3451 | 11747295_turquoise | perforin 1(PRF1)                                                    | Homo sapiens |
| 3452 | 11747301_turquoise | SP100 nuclear antigen(SP100)                                        | Homo sapiens |
| 3453 | 11747313_blue      | OXA1L, mitochondrial inner membrane protein(OXA1L)                  | Homo sapiens |
| 3454 | 11747315_blue      | ectonucleoside triphosphate diphosphohydrolase 6 (putative)(ENTPD6) | Homo sapiens |
| 3455 | 11747345_blue      | acyl-CoA dehydrogenase, C-4 to C-12 straight chain(ACADM)           | Homo sapiens |
| 3456 | 11747346_blue      | acyl-CoA dehydrogenase, C-4 to C-12 straight chain(ACADM)           | Homo sapiens |
| 3457 | 11747381_turquoise | septin 1(SEPT1)                                                     | Homo sapiens |
| 3458 | 11747401_blue      | COP9 signalosome subunit 7A(COPS7A)                                 | Homo sapiens |
| 3459 | 11747408_turquoise | filamin binding LIM protein 1(FBLIM1)                               | Homo sapiens |
| 3460 | 11747418_turquoise | napsin B aspartic peptidase, pseudogene(NAPSB)                      | Homo sapiens |
| 3461 | 11747437_turquoise | caspase recruitment domain family member 8(CARD8)                   | Homo sapiens |
| 3462 | 11747438_turquoise | GTPase, IMAP family member 4(GIMAP4)                                | Homo sapiens |
| 3463 | 11747439_turquoise | myosin light chain 6(MYL6)                                          | Homo sapiens |
| 3464 | 11747446_turquoise | major histocompatibility complex, class II, DO beta(HLA-DOB)        | Homo sapiens |
| 3465 | 11747448_turquoise | butyrophilin subfamily 3 member A2(BTN3A2)                          | Homo sapiens |
| 3466 | 11747449_turquoise | D-2-hydroxyglutarate dehydrogenase(D2HGDH)                          | Homo sapiens |
| 3467 | 11747453_turquoise | protein phosphatase 1 regulatory subunit 18(PPP1R18)                | Homo sapiens |
| 3468 | 11747460_turquoise | transgelin 2(TAGLN2)                                                | Homo sapiens |
| 3469 | 11747467_turquoise | protein kinase C theta(PRKCQ)                                       | Homo sapiens |
| 3470 | 11747483_turquoise | TNF alpha induced protein 8(TNFAIP8)                                | Homo sapiens |
| 3471 | 11747499_turquoise | intercellular adhesion molecule 1(ICAM1)                            | Homo sapiens |
| 3472 | 11747502_turquoise | mitochondrial translational release factor 1 like(MTRF1L)           | Homo sapiens |
| 3473 | 11747508_turquoise | erythrocyte membrane protein band 4.1 like 3(EPB41L3)               | Homo sapiens |
| 3474 | 11747509_turquoise | family with sequence similarity 107 member B(FAM107B)               | Homo sapiens |
| 3475 | 11747523_turquoise | TNF receptor associated factor 4(TRAF4)                             | Homo sapiens |
| 3476 | 11747533_blue      | G-rich RNA sequence binding factor 1(GRSF1)                         | Homo sapiens |
| 3477 | 11747538_turquoise | myeloid differentiation primary response 88(MYD88)                  | Homo sapiens |
| 3478 | 11747539_turquoise | myeloid differentiation primary response 88(MYD88)                  | Homo sapiens |
| 3479 | 11747546_blue      | phosphatidylinositol-4-phosphate 5-kinase type 1 beta(PIP5K1B)      | Homo sapiens |
| 3480 | 11747559_blue      | PDZ domain containing ring finger 3(PDZRN3)                         | Homo sapiens |
| 3481 | 11747589_blue      | glutamic-oxaloacetic transaminase 2(GOT2)                           | Homo sapiens |
| 3482 | 11747590_turquoise | Fc fragment of IgM receptor(FCMR)                                   | Homo sapiens |
| 3483 | 11747591_turquoise | GLI pathogenesis related 1(GLIPR1)                                  | Homo sapiens |
| 3484 | 11747593_turquoise | SH3 domain binding glutamate rich protein like(SH3BGRL)             | Homo sapiens |
| 3485 | 11747594_turquoise | SH3 domain binding glutamate rich protein like(SH3BGRL)             | Homo sapiens |
| 3486 | 11747597_turquoise | C-type lectin domain family 2 member D(CLEC2D)                      | Homo sapiens |
| 3487 | 11747602_turquoise | mitogen-activated protein kinase kinase kinase 8(MAP3K8)            | Homo sapiens |
| 3488 | 11747607_turquoise | purinergic receptor P2X 7(P2RX7)                                    | Homo sapiens |
| 3489 | 11747623_turquoise | Rho GTPase activating protein 25(ARHGAP25)                          | Homo sapiens |
| 3490 | 11747627_turquoise | tRNA-yW synthesizing protein 1 homolog B(TYW1B)                     | Homo sapiens |
| 3491 | 11747630_turquoise | XIAP associated factor 1(XAF1)                                      | Homo sapiens |
| 3492 | 11747631_turquoise | XIAP associated factor 1(XAF1)                                      | Homo sapiens |
| 3493 | 11747643_turquoise | BUB3, mitotic checkpoint protein(BUB3)                              | Homo sapiens |
| 3494 | 11747652_turquoise | cell division cycle 25B(CDC25B)                                     | Homo sapiens |
| 3495 | 11747653_turquoise | cell division cycle 25B(CDC25B)                                     | Homo sapiens |
| 3496 | 11747666_turquoise | tryptophanyl-tRNA synthetase(WARS)                                  | Homo sapiens |
| 3497 | 11747677_blue      | basic leucine zipper and W2 domains 2(BZW2)                         | Homo sapiens |
| 3498 | 11747680_turquoise | thyroid hormone receptor, alpha(THRA)                               | Homo sapiens |



|      |                    |                                                                             |              |
|------|--------------------|-----------------------------------------------------------------------------|--------------|
| 3499 | 11747681_turquoise | thyroid hormone receptor, alpha(THRA)                                       | Homo sapiens |
| 3500 | 11747714_turquoise | ATP binding cassette subfamily A member 8(ABCA8)                            | Homo sapiens |
| 3501 | 11747723_turquoise | death domain associated protein(DAXX)                                       | Homo sapiens |
| 3502 | 11747726_turquoise | syntaxin binding protein 6(STXBP6)                                          | Homo sapiens |
| 3503 | 11747731_turquoise | DBF4 zinc finger(DBF4)                                                      | Homo sapiens |
| 3504 | 11747742_turquoise | metal response element binding transcription factor 2(MTF2)                 | Homo sapiens |
| 3505 | 11747743_turquoise | metal response element binding transcription factor 2(MTF2)                 | Homo sapiens |
| 3506 | 11747772_blue      | pyruvate dehydrogenase (lipoamide) alpha 1(PDHA1)                           | Homo sapiens |
| 3507 | 11747785_turquoise | lymphocyte cytosolic protein 1(LCP1)                                        | Homo sapiens |
| 3508 | 11747799_turquoise | enolase 1(ENO1)                                                             | Homo sapiens |
| 3509 | 11747803_turquoise | CDC like kinase 2(CLK2)                                                     | Homo sapiens |
| 3510 | 11747811_turquoise | GRINL1A complex locus 1(GCOM1)                                              | Homo sapiens |
| 3511 | 11747820_turquoise | uridine phosphorylase 1(UPP1)                                               | Homo sapiens |
| 3512 | 11747895_turquoise | tectonic family member 1(TCTN1)                                             | Homo sapiens |
| 3513 | 11747902_blue      | echinoderm microtubule associated protein like 1(EML1)                      | Homo sapiens |
| 3514 | 11747926_turquoise | interferon gamma inducible protein 16(IFI16)                                | Homo sapiens |
| 3515 | 11747935_turquoise | tenascin C(TNC)                                                             | Homo sapiens |
| 3516 | 11747948_turquoise | small ArfGAP2(SMAP2)                                                        | Homo sapiens |
| 3517 | 11747952_turquoise | tumor necrosis factor superfamily member 10(TNFSF10)                        | Homo sapiens |
| 3518 | 11747961_turquoise | proteasome subunit beta 8(PSMB8)                                            | Homo sapiens |
| 3519 | 11747981_turquoise | APC down-regulated 1(APCDD1)                                                | Homo sapiens |
| 3520 | 11748003_turquoise | interferon induced protein 44(IFI44)                                        | Homo sapiens |
| 3521 | 11748014_blue      | voltage dependent anion channel 3(VDAC3)                                    | Homo sapiens |
| 3522 | 11748015_blue      | voltage dependent anion channel 3(VDAC3)                                    | Homo sapiens |
| 3523 | 11748034_turquoise | cytidine monophospho-N-acetylneuraminic acid hydroxylase, pseudogene(CMAHP) | Homo sapiens |
| 3524 | 11748088_turquoise | A-kinase anchoring protein 1(AKAP1)                                         | Homo sapiens |
| 3525 | 11748097_turquoise | poly(A) binding protein cytoplasmic 1(PABPC1)                               | Homo sapiens |
| 3526 | 11748099_turquoise | phosphatase and actin regulator 3(PHACTR3)                                  | Homo sapiens |
| 3527 | 11748120_turquoise | lymphocyte cytosolic protein 2(LCP2)                                        | Homo sapiens |
| 3528 | 11748148_blue      | coenzyme Q6, monooxygenase(COQ6)                                            | Homo sapiens |
| 3529 | 11748149_turquoise | formin binding protein 1(FNBP1)                                             | Homo sapiens |
| 3530 | 11748188_turquoise | alpha-N-acetylgalactosaminidase(NAGA)                                       | Homo sapiens |
| 3531 | 11748216_blue      | staufen double-stranded RNA binding protein 2(STAU2)                        | Homo sapiens |
| 3532 | 11748229_turquoise | interleukin 15 receptor subunit alpha(IL15RA)                               | Homo sapiens |
| 3533 | 11748230_turquoise | coronin 1A(CORO1A)                                                          | Homo sapiens |
| 3534 | 11748249_turquoise | NDRG family member 3(NDRG3)                                                 | Homo sapiens |
| 3535 | 11748250_turquoise | NDRG family member 3(NDRG3)                                                 | Homo sapiens |
| 3536 | 11748253_blue      | solute carrier family 5 member 1(SLC5A1)                                    | Homo sapiens |
| 3537 | 11748254_turquoise | male-specific lethal 3 homolog (Drosophila)(MSL3)                           | Homo sapiens |
| 3538 | 11748273_blue      | Raf-1 proto-oncogene, serine/threonine kinase(RAF1)                         | Homo sapiens |
| 3539 | 11748280_turquoise | serpin family B member 1(SERPINB1)                                          | Homo sapiens |
| 3540 | 11748281_turquoise | cyclin and CBS domain divalent metal cation transport mediator 4(CNNM4)     | Homo sapiens |
| 3541 | 11748301_turquoise | transcription factor Dp-2(TFDP2)                                            | Homo sapiens |
| 3542 | 11748304_turquoise | ectonucleoside triphosphate diphosphohydrolase 6 (putative)(ENTPD6)         | Homo sapiens |
| 3543 | 11748325_blue      | mitochondrial ribosomal protein S22(MRPS22)                                 | Homo sapiens |
| 3544 | 11748332_turquoise | major histocompatibility complex, class I, E(HLA-E)                         | Homo sapiens |
| 3545 | 11748339_turquoise | leukocyte associated immunoglobulin like receptor 1(LAIR1)                  | Homo sapiens |
| 3546 | 11748340_turquoise | leukocyte associated immunoglobulin like receptor 1(LAIR1)                  | Homo sapiens |
| 3547 | 11748343_brown     | intraflagellar transport 22(IFT22)                                          | Homo sapiens |
| 3548 | 11748344_brown     | intraflagellar transport 22(IFT22)                                          | Homo sapiens |

|      |                    |                                                                                   |              |
|------|--------------------|-----------------------------------------------------------------------------------|--------------|
| 3549 | 11748359_turquoise | BCR, RhoGEF and GTPase activating protein(BCR)                                    | Homo sapiens |
| 3550 | 11748362_turquoise | ATP binding cassette subfamily C member 3(ABCC3)                                  | Homo sapiens |
| 3551 | 11748400_turquoise | tropomyosin 4(TPM4)                                                               | Homo sapiens |
| 3552 | 11748401_turquoise | tropomyosin 4(TPM4)                                                               | Homo sapiens |
| 3553 | 11748423_blue      | phosphoglucomutase 1(PGM1)                                                        | Homo sapiens |
| 3554 | 11748483_turquoise | purinergic receptor P2X 7(P2RX7)                                                  | Homo sapiens |
| 3555 | 11748492_turquoise | layilin(LAYN)                                                                     | Homo sapiens |
| 3556 | 11748497_turquoise | grancalcin(GCA)                                                                   | Homo sapiens |
| 3557 | 11748509_blue      | voltage dependent anion channel 2(VDAC2)                                          | Homo sapiens |
| 3558 | 11748529_turquoise | caspase 4(CASP4)                                                                  | Homo sapiens |
| 3559 | 11748531_turquoise | calcium channel flower domain containing 1(CACFD1)                                | Homo sapiens |
| 3560 | 11748541_blue      | protease associated domain containing 1(PRADC1)                                   | Homo sapiens |
| 3561 | 11748548_turquoise | purinergic receptor P2X 4(P2RX4)                                                  | Homo sapiens |
| 3562 | 11748553_blue      | ubiquinol-cytochrome c reductase complex assembly factor 1(UQCC1)                 | Homo sapiens |
| 3563 | 11748555_turquoise | cyclin dependent kinase like 3(CDKL3)                                             | Homo sapiens |
| 3564 | 11748582_turquoise | ADP-ribosyltransferase 3(ART3)                                                    | Homo sapiens |
| 3565 | 11748583_blue      | ADP-ribosyltransferase 3(ART3)                                                    | Homo sapiens |
| 3566 | 11748604_turquoise | death associated protein kinase 2(DAPK2)                                          | Homo sapiens |
| 3567 | 11748620_blue      | succinate-CoA ligase ADP-forming beta subunit(SUCLA2)                             | Homo sapiens |
| 3568 | 11748650_turquoise | ADAM metallopeptidase domain 33(ADAM33)                                           | Homo sapiens |
| 3569 | 11748654_turquoise | protein tyrosine phosphatase, non-receptor type 22(PTPN22)                        | Homo sapiens |
| 3570 | 11748671_blue      | cullin 4A(CUL4A)                                                                  | Homo sapiens |
| 3571 | 11748695_brown     | synaptogyrin 1(SYNGR1)                                                            | Homo sapiens |
| 3572 | 11748702_turquoise | annexin A4(ANXA4)                                                                 | Homo sapiens |
| 3573 | 11748713_turquoise | abnormal spindle microtubule assembly(ASPM)                                       | Homo sapiens |
| 3574 | 11748747_turquoise | Rho GTPase activating protein 25(ARHGAP25)                                        | Homo sapiens |
| 3575 | 11748755_turquoise | Meis homeobox 2(MEIS2)                                                            | Homo sapiens |
| 3576 | 11748775_turquoise | uridine phosphorylase 1(UPP1)                                                     | Homo sapiens |
| 3577 | 11748780_turquoise | target of myb1 like 1 membrane trafficking protein(TOM1L1)                        | Homo sapiens |
| 3578 | 11748786_turquoise | thymocyte expressed, positive selection associated 1(TESPA1)                      | Homo sapiens |
| 3579 | 11748808_turquoise | AT-rich interaction domain 3B(ARID3B)                                             | Homo sapiens |
| 3580 | 11748839_blue      | NFS1, cysteine desulfurase(NFS1)                                                  | Homo sapiens |
| 3581 | 11748841_turquoise | SAM and HD domain containing deoxynucleoside triphosphate triphosphohydrolase 1(S | Homo sapiens |
| 3582 | 11748845_turquoise | SLAM family member 7(SLAMF7)                                                      | Homo sapiens |
| 3583 | 11748854_blue      | RNA pseudouridylate synthase domain containing 4(RPUSD4)                          | Homo sapiens |
| 3584 | 11748859_turquoise | transcription factor EC(TFEC)                                                     | Homo sapiens |
| 3585 | 11748860_blue      | apolipoprotein B mRNA editing enzyme catalytic subunit 2(APOBEC2)                 | Homo sapiens |
| 3586 | 11748874_blue      | mitochondrial ribosomal protein S25(MRPS25)                                       | Homo sapiens |
| 3587 | 11748897_turquoise | putative aquaporin-7-like protein 3(LOC100509620)                                 | Homo sapiens |
| 3588 | 11748905_turquoise | collagen triple helix repeat containing 1(CTHRC1)                                 | Homo sapiens |
| 3589 | 11748907_turquoise | retinoic acid receptor responder 3(RARRES3)                                       | Homo sapiens |
| 3590 | 11748915_turquoise | glutamic--pyruvic transaminase(GPT)                                               | Homo sapiens |
| 3591 | 11748972_turquoise | cell division cycle 25B(CDC25B)                                                   | Homo sapiens |
| 3592 | 11748973_turquoise | cell division cycle 25B(CDC25B)                                                   | Homo sapiens |
| 3593 | 11749002_turquoise | Rho GTPase activating protein 45(ARHGAP45)                                        | Homo sapiens |
| 3594 | 11749003_turquoise | endoplasmic reticulum aminopeptidase 1(ERAP1)                                     | Homo sapiens |
| 3595 | 11749016_turquoise | uncharacterized LOC100130460(CAND1.11)                                            | Homo sapiens |
| 3596 | 11749026_turquoise | protein tyrosine phosphatase, receptor type A(PTPRA)                              | Homo sapiens |
| 3597 | 11749040_turquoise | phosphoglucomutase 2(PGM2)                                                        | Homo sapiens |
| 3598 | 11749059_turquoise | reticulon 4(RTN4)                                                                 | Homo sapiens |

|      |                    |                                                                                     |              |
|------|--------------------|-------------------------------------------------------------------------------------|--------------|
| 3599 | 11749092_turquoise | NLR family member X1(NLRX1)                                                         | Homo sapiens |
| 3600 | 11749094_turquoise | dermatan sulfate epimerase(DSE)                                                     | Homo sapiens |
| 3601 | 11749097_turquoise | ATP binding cassette subfamily A member 8(ABCA8)                                    | Homo sapiens |
| 3602 | 11749104_turquoise | Rho GTPase activating protein 45(ARHGAP45)                                          | Homo sapiens |
| 3603 | 11749121_turquoise | interferon alpha and beta receptor subunit 2(IFNAR2)                                | Homo sapiens |
| 3604 | 11749132_turquoise | solute carrier organic anion transporter family member 2B1(SLCO2B1)                 | Homo sapiens |
| 3605 | 11749141_turquoise | TNF receptor associated factor 5(TRAF5)                                             | Homo sapiens |
| 3606 | 11749144_blue      | electron transfer flavoprotein dehydrogenase(ETFDH)                                 | Homo sapiens |
| 3607 | 11749164_turquoise | transmembrane protein 206(TMEM206)                                                  | Homo sapiens |
| 3608 | 11749171_turquoise | beta-ureidopropionase 1(UPB1)                                                       | Homo sapiens |
| 3609 | 11749188_turquoise | ectonucleoside triphosphate diphosphohydrolase 1(ENTPD1)                            | Homo sapiens |
| 3610 | 11749201_blue      | IQCJ-SCHIP1 readthrough(IQCJ-SCHIP1)                                                | Homo sapiens |
| 3611 | 11749214_turquoise | selectin P ligand(SELPLG)                                                           | Homo sapiens |
| 3612 | 11749225_turquoise | butyrophilin subfamily 2 member A2(BTN2A2)                                          | Homo sapiens |
| 3613 | 11749229_brown     | sirtuin 5(SIRT5)                                                                    | Homo sapiens |
| 3614 | 11749245_turquoise | C-X-C motif chemokine ligand 11(CXCL11)                                             | Homo sapiens |
| 3615 | 11749261_blue      | tubulin folding cofactor E(TBCE)                                                    | Homo sapiens |
| 3616 | 11749265_turquoise | putative aquaporin-7-like protein 3(LOC100509620)                                   | Homo sapiens |
| 3617 | 11749275_turquoise | src kinase associated phosphoprotein 2(SKAP2)                                       | Homo sapiens |
| 3618 | 11749293_turquoise | membrane spanning 4-domains A6A(MS4A6A)                                             | Homo sapiens |
| 3619 | 11749309_turquoise | prune exopolyphosphatase(PRUNE1)                                                    | Homo sapiens |
| 3620 | 11749310_turquoise | prune exopolyphosphatase(PRUNE1)                                                    | Homo sapiens |
| 3621 | 11749311_blue      | GrpE like 1, mitochondrial(GRPEL1)                                                  | Homo sapiens |
| 3622 | 11749326_turquoise | olfactomedin like 2B(OLFML2B)                                                       | Homo sapiens |
| 3623 | 11749329_turquoise | Rho GTPase activating protein 9(ARHGAP9)                                            | Homo sapiens |
| 3624 | 11749367_turquoise | FXFD domain containing ion transport regulator 5(FXYD5)                             | Homo sapiens |
| 3625 | 11749369_blue      | VAMP associated protein B and C(VAPB)                                               | Homo sapiens |
| 3626 | 11749370_turquoise | XIAP associated factor 1(XAF1)                                                      | Homo sapiens |
| 3627 | 11749377_turquoise | cat eye syndrome chromosome region, candidate 1(CECR1)                              | Homo sapiens |
| 3628 | 11749391_turquoise | quinolinate phosphoribosyltransferase(QPRT)                                         | Homo sapiens |
| 3629 | 11749392_blue      | ATP synthase, H+ transporting, mitochondrial F1 complex, gamma polypeptide 1(ATP5C) | Homo sapiens |
| 3630 | 11749398_brown     | B9 domain containing 1(B9D1)                                                        | Homo sapiens |
| 3631 | 11749399_brown     | MAPK regulated corepressor interacting protein 2(MCRIP2)                            | Homo sapiens |
| 3632 | 11749402_turquoise | integrin subunit alpha L(ITGAL)                                                     | Homo sapiens |
| 3633 | 11749412_turquoise | poly(ADP-ribose) polymerase family member 14(PARP14)                                | Homo sapiens |
| 3634 | 11749416_turquoise | small nucleolar RNA host gene 4(SNHG4)                                              | Homo sapiens |
| 3635 | 11749430_brown     | NADH:ubiquinone oxidoreductase complex assembly factor 6(NDUFAF6)                   | Homo sapiens |
| 3636 | 11749445_turquoise | uncharacterized LOC101928361(LOC101928361)                                          | Homo sapiens |
| 3637 | 11749492_turquoise | ribosomal protein S6 kinase A1(RPS6KA1)                                             | Homo sapiens |
| 3638 | 11749497_turquoise | DEXH-box helicase 58(DHX58)                                                         | Homo sapiens |
| 3639 | 11749510_turquoise | SAM and HD domain containing deoxynucleoside triphosphate triphosphohydrolase 1(S   | Homo sapiens |
| 3640 | 11749512_turquoise | signal transducer and activator of transcription 4(STAT4)                           | Homo sapiens |
| 3641 | 11749522_turquoise | lymphocyte activating 3(LAG3)                                                       | Homo sapiens |
| 3642 | 11749541_turquoise | sushi domain containing 4(SUSD4)                                                    | Homo sapiens |
| 3643 | 11749550_turquoise | serine carboxypeptidase 1(SCPEP1)                                                   | Homo sapiens |
| 3644 | 11749573_turquoise | arrestin beta 2(ARRB2)                                                              | Homo sapiens |
| 3645 | 11749578_turquoise | COX10, heme A:farnesyltransferase cytochrome c oxidase assembly factor(COX10)       | Homo sapiens |
| 3646 | 11749587_turquoise | Fc fragment of IgG receptor IIa(FCGR2A)                                             | Homo sapiens |
| 3647 | 11749589_turquoise | cathepsin S(CTSS)                                                                   | Homo sapiens |
| 3648 | 11749595_turquoise | guanylate binding protein 4(GBP4)                                                   | Homo sapiens |

|      |                    |                                                                      |              |
|------|--------------------|----------------------------------------------------------------------|--------------|
| 3649 | 11749613_turquoise | OCIA domain containing 1(OCIAD1)                                     | Homo sapiens |
| 3650 | 11749625_turquoise | PQ loop repeat containing 3(PQLC3)                                   | Homo sapiens |
| 3651 | 11749660_turquoise | Mov10 RISC complex RNA helicase(MOV10)                               | Homo sapiens |
| 3652 | 11749674_turquoise | shootin 1(SHTN1)                                                     | Homo sapiens |
| 3653 | 11749676_turquoise | B-cell CLL/lymphoma 11A(BCL11A)                                      | Homo sapiens |
| 3654 | 11749690_blue      | LARGE xylosyl- and glucuronyltransferase 1(LARGE1)                   | Homo sapiens |
| 3655 | 11749697_blue      | NADH:ubiquinone oxidoreductase core subunit S1(NDUFS1)               | Homo sapiens |
| 3656 | 11749708_turquoise | Fli-1 proto-oncogene, ETS transcription factor(FLI1)                 | Homo sapiens |
| 3657 | 11749722_blue      | NADH:ubiquinone oxidoreductase core subunit S1(NDUFS1)               | Homo sapiens |
| 3658 | 11749740_turquoise | ubiquitin specific peptidase 3(USP3)                                 | Homo sapiens |
| 3659 | 11749750_turquoise | WAS/WASL interacting protein family member 1(WIPF1)                  | Homo sapiens |
| 3660 | 11749751_turquoise | WAS/WASL interacting protein family member 1(WIPF1)                  | Homo sapiens |
| 3661 | 11749752_turquoise | WAS/WASL interacting protein family member 1(WIPF1)                  | Homo sapiens |
| 3662 | 11749761_turquoise | PC-esterase domain containing 1A(PCED1A)                             | Homo sapiens |
| 3663 | 11749773_turquoise | guanylate binding protein 1(GBP1)                                    | Homo sapiens |
| 3664 | 11749786_turquoise | heterogeneous nuclear ribonucleoprotein F(HNRNPF)                    | Homo sapiens |
| 3665 | 11749788_turquoise | L-2-hydroxyglutarate dehydrogenase(L2HGDH)                           | Homo sapiens |
| 3666 | 11749790_turquoise | caspase 8(CASP8)                                                     | Homo sapiens |
| 3667 | 11749792_turquoise | PBX homeobox 1(PBX1)                                                 | Homo sapiens |
| 3668 | 11749793_turquoise | annexin A4(ANXA4)                                                    | Homo sapiens |
| 3669 | 11749794_turquoise | annexin A4(ANXA4)                                                    | Homo sapiens |
| 3670 | 11749827_turquoise | cytochrome b-245 beta chain(CYBB)                                    | Homo sapiens |
| 3671 | 11749833_turquoise | angiotensinogen(AGT)                                                 | Homo sapiens |
| 3672 | 11749844_turquoise | colony stimulating factor 2 receptor alpha subunit(CSF2RA)           | Homo sapiens |
| 3673 | 11749862_turquoise | apolipoprotein L3(APOL3)                                             | Homo sapiens |
| 3674 | 11749879_turquoise | post-GPI attachment to proteins 2(PGAP2)                             | Homo sapiens |
| 3675 | 11749880_turquoise | post-GPI attachment to proteins 2(PGAP2)                             | Homo sapiens |
| 3676 | 11749893_turquoise | carbonic anhydrase 14(CA14)                                          | Homo sapiens |
| 3677 | 11749894_turquoise | deoxycytidine kinase(DCK)                                            | Homo sapiens |
| 3678 | 11749914_blue      | single-pass membrane protein with coiled-coil domains 1(SMCO1)       | Homo sapiens |
| 3679 | 11749917_turquoise | hes related family bHLH transcription factor with YRPW motif 2(HEY2) | Homo sapiens |
| 3680 | 11749924_turquoise | mitochondrial ribosomal protein S25(MRPS25)                          | Homo sapiens |
| 3681 | 11749935_turquoise | tropomyosin 3(TPM3)                                                  | Homo sapiens |
| 3682 | 11749978_turquoise | major vault protein(MVP)                                             | Homo sapiens |
| 3683 | 11749990_turquoise | major histocompatibility complex, class I, A(HLA-A)                  | Homo sapiens |
| 3684 | 11750000_turquoise | C-type lectin domain family 7 member A(CLEC7A)                       | Homo sapiens |
| 3685 | 11750001_turquoise | C-type lectin domain family 7 member A(CLEC7A)                       | Homo sapiens |
| 3686 | 11750006_brown     | cytochrome c oxidase assembly factor 1 homolog(COA1)                 | Homo sapiens |
| 3687 | 11750038_blue      | mitochondrial trans-2-enoyl-CoA reductase(MECR)                      | Homo sapiens |
| 3688 | 11750044_blue      | NFS1, cysteine desulfurase(NFS1)                                     | Homo sapiens |
| 3689 | 11750045_turquoise | tropomyosin 3(TPM3)                                                  | Homo sapiens |
| 3690 | 11750059_blue      | MLX, MAX dimerization protein(MLX)                                   | Homo sapiens |
| 3691 | 11750080_turquoise | damage specific DNA binding protein 2(DDB2)                          | Homo sapiens |
| 3692 | 11750103_blue      | hydroxyacyl-CoA dehydrogenase(HADH)                                  | Homo sapiens |
| 3693 | 11750107_turquoise | SEL1L family member 3(SEL1L3)                                        | Homo sapiens |
| 3694 | 11750111_turquoise | vinculin(VCL)                                                        | Homo sapiens |
| 3695 | 11750135_blue      | monoamine oxidase B(MAOB)                                            | Homo sapiens |
| 3696 | 11750143_turquoise | phosphatidylinositol glycan anchor biosynthesis class Z(PIGZ)        | Homo sapiens |
| 3697 | 11750146_turquoise | transketolase like 1(TKTL1)                                          | Homo sapiens |
| 3698 | 11750159_turquoise | basic leucine zipper ATF-like transcription factor 2(BATF2)          | Homo sapiens |

|      |                    |                                                                  |              |
|------|--------------------|------------------------------------------------------------------|--------------|
| 3699 | 11750170_turquoise | tripartite motif containing 22(TRIM22)                           | Homo sapiens |
| 3700 | 11750171_turquoise | transducin like enhancer of split 2(TLE2)                        | Homo sapiens |
| 3701 | 11750178_turquoise | enoyl-CoA hydratase domain containing 2(ECHDC2)                  | Homo sapiens |
| 3702 | 11750179_turquoise | enoyl-CoA hydratase domain containing 2(ECHDC2)                  | Homo sapiens |
| 3703 | 11750185_turquoise | coiled-coil domain containing 71-like(CCDC71L)                   | Homo sapiens |
| 3704 | 11750189_turquoise | CD44 molecule (Indian blood group)(CD44)                         | Homo sapiens |
| 3705 | 11750190_turquoise | CD44 molecule (Indian blood group)(CD44)                         | Homo sapiens |
| 3706 | 11750196_turquoise | annexin A4(ANXA4)                                                | Homo sapiens |
| 3707 | 11750198_turquoise | caspase 7(CASP7)                                                 | Homo sapiens |
| 3708 | 11750199_turquoise | hematopoietic cell-specific Lyn substrate 1(HCLS1)               | Homo sapiens |
| 3709 | 11750223_brown     | NAD(P)HX epimerase(NAXE)                                         | Homo sapiens |
| 3710 | 11750231_yellow    | microRNA 8071-1(MIR8071-1)                                       | Homo sapiens |
| 3711 | 11750250_turquoise | protein phosphatase 1 regulatory subunit 13 like(PPP1R13L)       | Homo sapiens |
| 3712 | 11750267_turquoise | inositol polyphosphate-5-phosphatase J(INPP5J)                   | Homo sapiens |
| 3713 | 11750282_turquoise | microRNA 6837(MIR6837)                                           | Homo sapiens |
| 3714 | 11750284_turquoise | lines homolog 1(LINS1)                                           | Homo sapiens |
| 3715 | 11750293_brown     | RAD51 paralog C(RAD51C)                                          | Homo sapiens |
| 3716 | 11750301_turquoise | family with sequence similarity 92 member A(FAM92A)              | Homo sapiens |
| 3717 | 11750334_turquoise | REL proto-oncogene, NF-kB subunit(REL)                           | Homo sapiens |
| 3718 | 11750359_turquoise | small nucleolar RNA, H/ACA box 67(SNORA67)                       | Homo sapiens |
| 3719 | 11750374_turquoise | Rap guanine nucleotide exchange factor 6(RAPGEF6)                | Homo sapiens |
| 3720 | 11750376_turquoise | potassium calcium-activated channel subfamily M alpha 1(KCNMA1)  | Homo sapiens |
| 3721 | 11750408_turquoise | adhesion G protein-coupled receptor E5(ADGRE5)                   | Homo sapiens |
| 3722 | 11750453_turquoise | parkin RBR E3 ubiquitin protein ligase(PARK2)                    | Homo sapiens |
| 3723 | 11750454_turquoise | ETS variant 7(ETV7)                                              | Homo sapiens |
| 3724 | 11750455_turquoise | ETS variant 7(ETV7)                                              | Homo sapiens |
| 3725 | 11750527_turquoise | major histocompatibility complex, class II, DQ alpha 1(HLA-DQA1) | Homo sapiens |
| 3726 | 11750528_turquoise | major histocompatibility complex, class II, DQ alpha 1(HLA-DQA1) | Homo sapiens |
| 3727 | 11750531_turquoise | PYD and CARD domain containing(PYCARD)                           | Homo sapiens |
| 3728 | 11750551_turquoise | serine/threonine kinase 4(STK4)                                  | Homo sapiens |
| 3729 | 11750552_turquoise | caspase recruitment domain family member 16(CARD16)              | Homo sapiens |
| 3730 | 11750553_turquoise | caspase 1(CASP1)                                                 | Homo sapiens |
| 3731 | 11750575_turquoise | zinc finger protein, FOG family member 2(ZFPM2)                  | Homo sapiens |
| 3732 | 11750585_turquoise | septin 9(SEPT9)                                                  | Homo sapiens |
| 3733 | 11750594_blue      | phospholipase C like 1(PLCL1)                                    | Homo sapiens |
| 3734 | 11750598_turquoise | TPX2, microtubule nucleation factor(TPX2)                        | Homo sapiens |
| 3735 | 11750629_turquoise | C1q and tumor necrosis factor related protein 8(C1QTNF8)         | Homo sapiens |
| 3736 | 11750636_turquoise | acetyl-CoA carboxylase beta(ACACB)                               | Homo sapiens |
| 3737 | 11750674_turquoise | signal transducer and activator of transcription 3(STAT3)        | Homo sapiens |
| 3738 | 11750677_turquoise | family with sequence similarity 65 member C(FAM65C)              | Homo sapiens |
| 3739 | 11750687_turquoise | ADAM metallopeptidase domain 28(ADAM28)                          | Homo sapiens |
| 3740 | 11750704_turquoise | sex comb on midleg homolog 1 (Drosophila)(SCMH1)                 | Homo sapiens |
| 3741 | 11750723_turquoise | MHC class I polypeptide-related sequence B(MICB)                 | Homo sapiens |
| 3742 | 11750740_turquoise | ST3 beta-galactoside alpha-2,3-sialyltransferase 5(ST3GAL5)      | Homo sapiens |
| 3743 | 11750766_turquoise | transforming acidic coiled-coil containing protein 2(TACC2)      | Homo sapiens |
| 3744 | 11750769_turquoise | C-C motif chemokine receptor 2(CCR2)                             | Homo sapiens |
| 3745 | 11750773_turquoise | kinesin family member 2A(KIF2A)                                  | Homo sapiens |
| 3746 | 11750778_turquoise | macrophage scavenger receptor 1(MSR1)                            | Homo sapiens |
| 3747 | 11750800_turquoise | ligand of numb-protein X 1(LNX1)                                 | Homo sapiens |
| 3748 | 11750811_turquoise | eomesodermin(EOMES)                                              | Homo sapiens |

|      |                    |                                                                                    |              |
|------|--------------------|------------------------------------------------------------------------------------|--------------|
| 3749 | 11750812_turquoise | Fli-1 proto-oncogene, ETS transcription factor(FLI1)                               | Homo sapiens |
| 3750 | 11750815_turquoise | microRNA 3064(MIR3064)                                                             | Homo sapiens |
| 3751 | 11750816_turquoise | CD96 molecule(CD96)                                                                | Homo sapiens |
| 3752 | 11750821_turquoise | mirror-image polydactyly 1(MIPOL1)                                                 | Homo sapiens |
| 3753 | 11750826_turquoise | ADAM like decysin 1(ADAMDEC1)                                                      | Homo sapiens |
| 3754 | 11750847_turquoise | ankyrin repeat domain 44(ANKRD44)                                                  | Homo sapiens |
| 3755 | 11750856_turquoise | C-C motif chemokine receptor 2(CCR2)                                               | Homo sapiens |
| 3756 | 11750860_turquoise | cytidine monophospho-N-acetylneuraminic acid hydroxylase, pseudogene(CMAHP)        | Homo sapiens |
| 3757 | 11750861_turquoise | cytidine monophospho-N-acetylneuraminic acid hydroxylase, pseudogene(CMAHP)        | Homo sapiens |
| 3758 | 11750894_turquoise | T-box 5(TBX5)                                                                      | Homo sapiens |
| 3759 | 11750914_blue      | G1 to S phase transition 2(GSPT2)                                                  | Homo sapiens |
| 3760 | 11750932_turquoise | epoxide hydrolase 2(EPHX2)                                                         | Homo sapiens |
| 3761 | 11750984_turquoise | mannosyl (alpha-1,6-)-glycoprotein beta-1,2-N-acetylglucosaminyltransferase(MGAT2) | Homo sapiens |
| 3762 | 11751002_blue      | dihydrolipoamide S-acetyltransferase(DLAT)                                         | Homo sapiens |
| 3763 | 11751013_turquoise | glycine receptor beta(GLRB)                                                        | Homo sapiens |
| 3764 | 11751031_turquoise | c-src tyrosine kinase(CSK)                                                         | Homo sapiens |
| 3765 | 11751084_turquoise | plexin D1(PLXND1)                                                                  | Homo sapiens |
| 3766 | 11751096_turquoise | sorting nexin 10(SNX10)                                                            | Homo sapiens |
| 3767 | 11751097_turquoise | sorting nexin 10(SNX10)                                                            | Homo sapiens |
| 3768 | 11751105_turquoise | wolframin ER transmembrane glycoprotein(WFS1)                                      | Homo sapiens |
| 3769 | 11751135_turquoise | CD86 molecule(CD86)                                                                | Homo sapiens |
| 3770 | 11751141_turquoise | ARP3 actin related protein 3 homolog(ACR3)                                         | Homo sapiens |
| 3771 | 11751162_turquoise | tweety family member 1(TTYH1)                                                      | Homo sapiens |
| 3772 | 11751178_turquoise | ATPase H+ transporting V1 subunit A(ATP6V1A)                                       | Homo sapiens |
| 3773 | 11751202_turquoise | chromosome 19 open reading frame 66(C19orf66)                                      | Homo sapiens |
| 3774 | 11751225_turquoise | colony stimulating factor 2 receptor alpha subunit(CSF2RA)                         | Homo sapiens |
| 3775 | 11751242_turquoise | Fc fragment of IgG receptor IIa(FCGR2A)                                            | Homo sapiens |
| 3776 | 11751288_turquoise | lysyl oxidase like 2(LOXL2)                                                        | Homo sapiens |
| 3777 | 11751299_turquoise | apolipoprotein L2(APOL2)                                                           | Homo sapiens |
| 3778 | 11751304_turquoise | integrin subunit alpha L(ITGAL)                                                    | Homo sapiens |
| 3779 | 11751305_blue      | beta-1,4-glucuronyltransferase 1(B4GAT1)                                           | Homo sapiens |
| 3780 | 11751318_turquoise | SEN3-EIF4A1 readthrough (NMD candidate)(SEN3-EIF4A1)                               | Homo sapiens |
| 3781 | 11751319_turquoise | SEN3-EIF4A1 readthrough (NMD candidate)(SEN3-EIF4A1)                               | Homo sapiens |
| 3782 | 11751332_turquoise | cytokine receptor like factor 3(CRLF3)                                             | Homo sapiens |
| 3783 | 11751399_turquoise | NDRG family member 3(NDRG3)                                                        | Homo sapiens |
| 3784 | 11751422_turquoise | choline dehydrogenase(CHDH)                                                        | Homo sapiens |
| 3785 | 11751424_turquoise | TRAF3 interacting protein 3(TRAF3IP3)                                              | Homo sapiens |
| 3786 | 11751425_turquoise | TRAF3 interacting protein 3(TRAF3IP3)                                              | Homo sapiens |
| 3787 | 11751440_blue      | microtubule associated tumor suppressor candidate 2(MTUS2)                         | Homo sapiens |
| 3788 | 11751465_turquoise | growth factor receptor bound protein 14(GRB14)                                     | Homo sapiens |
| 3789 | 11751467_turquoise | phosphatidylinositol glycan anchor biosynthesis class U(PIGU)                      | Homo sapiens |
| 3790 | 11751482_turquoise | butyrophilin subfamily 3 member A2(BTN3A2)                                         | Homo sapiens |
| 3791 | 11751501_turquoise | fatty acid hydroxylase domain containing 2(FAXDC2)                                 | Homo sapiens |
| 3792 | 11751511_turquoise | ETS variant 7(ETV7)                                                                | Homo sapiens |
| 3793 | 11751544_turquoise | myosin IF(MYO1F)                                                                   | Homo sapiens |
| 3794 | 11751571_turquoise | sarcoglycan alpha(SGCA)                                                            | Homo sapiens |
| 3795 | 11751585_blue      | ankyrin repeat and SOCS box containing 8(ASB8)                                     | Homo sapiens |
| 3796 | 11751596_turquoise | abl interactor 1(ABI1)                                                             | Homo sapiens |
| 3797 | 11751597_turquoise | abl interactor 1(ABI1)                                                             | Homo sapiens |
| 3798 | 11751600_turquoise | dual adaptor of phosphotyrosine and 3-phosphoinositides 1(DAPP1)                   | Homo sapiens |

|      |                    |                                                               |              |
|------|--------------------|---------------------------------------------------------------|--------------|
| 3799 | 11751602_turquoise | serine and arginine rich splicing factor 7(SRSF7)             | Homo sapiens |
| 3800 | 11751603_turquoise | serine and arginine rich splicing factor 7(SRSF7)             | Homo sapiens |
| 3801 | 11751611_turquoise | TRAF-type zinc finger domain containing 1(TRAFD1)             | Homo sapiens |
| 3802 | 11751616_blue      | lactamase beta 2(LACTB2)                                      | Homo sapiens |
| 3803 | 11751618_turquoise | major histocompatibility complex, class I, E(HLA-E)           | Homo sapiens |
| 3804 | 11751619_turquoise | apolipoprotein L1(APOL1)                                      | Homo sapiens |
| 3805 | 11751628_turquoise | transmembrane protein 140(TMEM140)                            | Homo sapiens |
| 3806 | 11751641_turquoise | PHD finger protein 11(PHF11)                                  | Homo sapiens |
| 3807 | 11751647_turquoise | interleukin 7 receptor(IL7R)                                  | Homo sapiens |
| 3808 | 11751651_turquoise | phospholipid scramblase 1(PLSCR1)                             | Homo sapiens |
| 3809 | 11751652_turquoise | phospholipid scramblase 1(PLSCR1)                             | Homo sapiens |
| 3810 | 11751680_brown     | ubiquinol-cytochrome c reductase binding protein(UQCRB)       | Homo sapiens |
| 3811 | 11751688_turquoise | glycoprotein integral membrane 1(GINM1)                       | Homo sapiens |
| 3812 | 11751690_turquoise | putative aquaporin-7-like protein 3(LOC100509620)             | Homo sapiens |
| 3813 | 11751702_blue      | PATJ, crumbs cell polarity complex component(PATJ)            | Homo sapiens |
| 3814 | 11751713_turquoise | chromosome 6 open reading frame 62(C6orf62)                   | Homo sapiens |
| 3815 | 11751724_turquoise | zinc finger protein 542, pseudogene(ZNF542P)                  | Homo sapiens |
| 3816 | 11751746_brown     | guanidinoacetate N-methyltransferase(GAMT)                    | Homo sapiens |
| 3817 | 11751765_turquoise | ribonucleoprotein, PTB binding 2(RAVER2)                      | Homo sapiens |
| 3818 | 11751766_turquoise | enoyl-CoA hydratase domain containing 2(ECHDC2)               | Homo sapiens |
| 3819 | 11751768_turquoise | sorting nexin 19(SNX19)                                       | Homo sapiens |
| 3820 | 11751776_blue      | prohibitin(PHB)                                               | Homo sapiens |
| 3821 | 11751778_brown     | translocase of inner mitochondrial membrane 23(TIMM23)        | Homo sapiens |
| 3822 | 11751782_turquoise | EF-hand domain containing 2(EFHC2)                            | Homo sapiens |
| 3823 | 11751799_turquoise | peroxiredoxin 6(PRX6)                                         | Homo sapiens |
| 3824 | 11751805_turquoise | thymidylate synthetase(TYMS)                                  | Homo sapiens |
| 3825 | 11751821_turquoise | cytochrome b-245 beta chain(CYBB)                             | Homo sapiens |
| 3826 | 11751833_turquoise | butyrylcholinesterase(BCHE)                                   | Homo sapiens |
| 3827 | 11751857_turquoise | granulysin(GNLY)                                              | Homo sapiens |
| 3828 | 11751861_blue      | hyaluronoglucosaminidase 1(HYAL1)                             | Homo sapiens |
| 3829 | 11751888_turquoise | collagen type IV alpha 6 chain(COL4A6)                        | Homo sapiens |
| 3830 | 11751890_turquoise | sodium voltage-gated channel alpha subunit 5(SCN5A)           | Homo sapiens |
| 3831 | 11751893_turquoise | collagen type IV alpha 6 chain(COL4A6)                        | Homo sapiens |
| 3832 | 11751917_turquoise | myotubularin related protein 12(MTMR12)                       | Homo sapiens |
| 3833 | 11751921_turquoise | aryl hydrocarbon receptor(AHR)                                | Homo sapiens |
| 3834 | 11752003_turquoise | IQ motif containing GTPase activating protein 1(IQGAP1)       | Homo sapiens |
| 3835 | 11752009_turquoise | tenascin C(TNC)                                               | Homo sapiens |
| 3836 | 11752036_turquoise | transmembrane protein 123(TMEM123)                            | Homo sapiens |
| 3837 | 11752051_turquoise | myosin heavy chain 9(MYH9)                                    | Homo sapiens |
| 3838 | 11752052_turquoise | myosin heavy chain 9(MYH9)                                    | Homo sapiens |
| 3839 | 11752065_turquoise | CD6 molecule(CD6)                                             | Homo sapiens |
| 3840 | 11752095_turquoise | protein tyrosine phosphatase, receptor type C(PTPRC)          | Homo sapiens |
| 3841 | 11752142_turquoise | filamin A(FLNA)                                               | Homo sapiens |
| 3842 | 11752149_turquoise | ubiquitin associated and SH3 domain containing A(UBASH3A)     | Homo sapiens |
| 3843 | 11752153_turquoise | neurobeachin like 2(NBEAL2)                                   | Homo sapiens |
| 3844 | 11752154_turquoise | neurobeachin like 2(NBEAL2)                                   | Homo sapiens |
| 3845 | 11752163_turquoise | lysine demethylase 2B(KDM2B)                                  | Homo sapiens |
| 3846 | 11752164_turquoise | lysine demethylase 2B(KDM2B)                                  | Homo sapiens |
| 3847 | 11752171_turquoise | serine palmitoyltransferase long chain base subunit 1(SPTLC1) | Homo sapiens |
| 3848 | 11752173_turquoise | transmembrane protein 2(TMEM2)                                | Homo sapiens |

|      |                    |                                                                                   |              |
|------|--------------------|-----------------------------------------------------------------------------------|--------------|
| 3849 | 11752175_turquoise | DBF4 zinc finger(DBF4)                                                            | Homo sapiens |
| 3850 | 11752180_turquoise | von Hippel-Lindau tumor suppressor(VHL)                                           | Homo sapiens |
| 3851 | 11752224_turquoise | schlafen family member 5(SLFN5)                                                   | Homo sapiens |
| 3852 | 11752233_turquoise | copine 4(CPNE4)                                                                   | Homo sapiens |
| 3853 | 11752235_turquoise | inhibitor of kappa light polypeptide gene enhancer in B-cells, kinase beta(IKBKB) | Homo sapiens |
| 3854 | 11752265_turquoise | androgen receptor(AR)                                                             | Homo sapiens |
| 3855 | 11752267_turquoise | ribosomal protein S6 kinase A4(RPS6KA4)                                           | Homo sapiens |
| 3856 | 11752273_turquoise | colony stimulating factor 1 receptor(CSF1R)                                       | Homo sapiens |
| 3857 | 11752278_turquoise | poly(A) binding protein cytoplasmic 1(PABPC1)                                     | Homo sapiens |
| 3858 | 11752297_turquoise | class II major histocompatibility complex transactivator(CIITA)                   | Homo sapiens |
| 3859 | 11752318_turquoise | butyrophilin subfamily 3 member A3(BTN3A3)                                        | Homo sapiens |
| 3860 | 11752331_turquoise | SLX1A-SULT1A3 readthrough (NMD candidate)(SLX1A-SULT1A3)                          | Homo sapiens |
| 3861 | 11752341_turquoise | coagulation factor VIII(F8)                                                       | Homo sapiens |
| 3862 | 11752379_turquoise | multiple C2 and transmembrane domain containing 1(MCTP1)                          | Homo sapiens |
| 3863 | 11752387_turquoise | ETS proto-oncogene 1, transcription factor(ETS1)                                  | Homo sapiens |
| 3864 | 11752398_turquoise | chromosome 1 open reading frame 228(C1orf228)                                     | Homo sapiens |
| 3865 | 11752411_turquoise | coiled-coil domain containing 8(CCDC8)                                            | Homo sapiens |
| 3866 | 11752467_turquoise | inositol polyphosphate-5-phosphatase D(INPP5D)                                    | Homo sapiens |
| 3867 | 11752482_turquoise | fibrillin 2(FBN2)                                                                 | Homo sapiens |
| 3868 | 11752535_turquoise | cyclin L1(CCNL1)                                                                  | Homo sapiens |
| 3869 | 11752568_turquoise | LCK proto-oncogene, Src family tyrosine kinase(LCK)                               | Homo sapiens |
| 3870 | 11752569_turquoise | LCK proto-oncogene, Src family tyrosine kinase(LCK)                               | Homo sapiens |
| 3871 | 11752606_turquoise | microRNA 6845(MIR6845)                                                            | Homo sapiens |
| 3872 | 11752607_turquoise | microRNA 6132(MIR6132)                                                            | Homo sapiens |
| 3873 | 11752608_turquoise | microRNA 6132(MIR6132)                                                            | Homo sapiens |
| 3874 | 11752610_turquoise | thymocyte selection associated family member 2(THEMIS2)                           | Homo sapiens |
| 3875 | 11752611_turquoise | signal sequence receptor subunit 1(SSR1)                                          | Homo sapiens |
| 3876 | 11752631_turquoise | SAM and SH3 domain containing 3(SASH3)                                            | Homo sapiens |
| 3877 | 11752635_turquoise | potassium voltage-gated channel subfamily H member 2(KCNH2)                       | Homo sapiens |
| 3878 | 11752644_turquoise | TIA1 cytotoxic granule associated RNA binding protein like 1(TIAL1)               | Homo sapiens |
| 3879 | 11752649_blue      | aconitase 2(ACO2)                                                                 | Homo sapiens |
| 3880 | 11752697_turquoise | PC-esterase domain containing 1A(PCED1A)                                          | Homo sapiens |
| 3881 | 11752698_turquoise | PC-esterase domain containing 1A(PCED1A)                                          | Homo sapiens |
| 3882 | 11752723_turquoise | CD200 receptor 1(CD200R1)                                                         | Homo sapiens |
| 3883 | 11752732_turquoise | dihydrouridine synthase 4 like(DUS4L)                                             | Homo sapiens |
| 3884 | 11752737_turquoise | C-type lectin domain family 7 member A(CLEC7A)                                    | Homo sapiens |
| 3885 | 11752747_blue      | MRS2, magnesium transporter(MRS2)                                                 | Homo sapiens |
| 3886 | 11752748_blue      | MRS2, magnesium transporter(MRS2)                                                 | Homo sapiens |
| 3887 | 11752769_turquoise | piggyBac transposable element derived 5(PGBD5)                                    | Homo sapiens |
| 3888 | 11752771_turquoise | carbohydrate sulfotransferase 15(CHST15)                                          | Homo sapiens |
| 3889 | 11752794_turquoise | signal transducer and activator of transcription 2(STAT2)                         | Homo sapiens |
| 3890 | 11752795_turquoise | signal transducer and activator of transcription 2(STAT2)                         | Homo sapiens |
| 3891 | 11752796_turquoise | chromosome 3 open reading frame 33(C3orf33)                                       | Homo sapiens |
| 3892 | 11752801_turquoise | SP110 nuclear body protein(SP110)                                                 | Homo sapiens |
| 3893 | 11752802_turquoise | SP110 nuclear body protein(SP110)                                                 | Homo sapiens |
| 3894 | 11752812_turquoise | tweety family member 1(TTYH1)                                                     | Homo sapiens |
| 3895 | 11752814_turquoise | TNF receptor superfamily member 1A(TNFRSF1A)                                      | Homo sapiens |
| 3896 | 11752817_turquoise | tripeptidyl peptidase 1(TPP1)                                                     | Homo sapiens |
| 3897 | 11752833_turquoise | post-GPI attachment to proteins 2(PGAP2)                                          | Homo sapiens |
| 3898 | 11752865_turquoise | actin beta(ACTB)                                                                  | Homo sapiens |



|      |                    |                                                                      |              |
|------|--------------------|----------------------------------------------------------------------|--------------|
| 3899 | 11752873_turquoise | src kinase associated phosphoprotein 1(SKAP1)                        | Homo sapiens |
| 3900 | 11752877_turquoise | tubulin beta class I(TUBB)                                           | Homo sapiens |
| 3901 | 11752890_turquoise | syntrophin alpha 1(SNTA1)                                            | Homo sapiens |
| 3902 | 11752898_turquoise | peptidylprolyl isomerase like 6(PPIL6)                               | Homo sapiens |
| 3903 | 11752910_turquoise | ADP ribosylation factor like GTPase 6 interacting protein 1(ARL6IP1) | Homo sapiens |
| 3904 | 11752915_blue      | ryanodine receptor 2(RYR2)                                           | Homo sapiens |
| 3905 | 11752918_turquoise | Fc receptor like 6(FCRL6)                                            | Homo sapiens |
| 3906 | 11752919_blue      | acyl-CoA dehydrogenase, C-4 to C-12 straight chain(ACADM)            | Homo sapiens |
| 3907 | 11752930_turquoise | guanylate binding protein 1(GBP1)                                    | Homo sapiens |
| 3908 | 11752931_turquoise | guanylate binding protein 1(GBP1)                                    | Homo sapiens |
| 3909 | 11752948_turquoise | prolylcarboxypeptidase(PRCP)                                         | Homo sapiens |
| 3910 | 11752959_turquoise | actin beta(ACTB)                                                     | Homo sapiens |
| 3911 | 11752964_blue      | solute carrier family 25 member 20(SLC25A20)                         | Homo sapiens |
| 3912 | 11752987_turquoise | EPN2 intronic transcript 1(EPN2-IT1)                                 | Homo sapiens |
| 3913 | 11753025_turquoise | TNF receptor superfamily member 1B(TNFRSF1B)                         | Homo sapiens |
| 3914 | 11753034_turquoise | zinc finger NFX1-type containing 1(ZNFX1)                            | Homo sapiens |
| 3915 | 11753055_turquoise | RAP1B, member of RAS oncogene family(RAP1B)                          | Homo sapiens |
| 3916 | 11753056_turquoise | zinc finger protein 667(ZNF667)                                      | Homo sapiens |
| 3917 | 11753061_turquoise | schlafen family member 5(SLFN5)                                      | Homo sapiens |
| 3918 | 11753088_turquoise | multiple C2 and transmembrane domain containing 1(MCTP1)             | Homo sapiens |
| 3919 | 11753090_turquoise | opioid growth factor receptor(OGFR)                                  | Homo sapiens |
| 3920 | 11753106_turquoise | target of myb1 like 2 membrane trafficking protein(TOM1L2)           | Homo sapiens |
| 3921 | 11753111_turquoise | interleukin 10 receptor subunit beta(IL10RB)                         | Homo sapiens |
| 3922 | 11753129_turquoise | transmembrane 4 L six family member 1(TM4SF1)                        | Homo sapiens |
| 3923 | 11753132_turquoise | solute carrier family 50 member 1(SLC50A1)                           | Homo sapiens |
| 3924 | 11753151_turquoise | histone deacetylase 8(HDAC8)                                         | Homo sapiens |
| 3925 | 11753165_turquoise | RAB27A, member RAS oncogene family(RAB27A)                           | Homo sapiens |
| 3926 | 11753213_turquoise | G protein subunit alpha i2(GNAI2)                                    | Homo sapiens |
| 3927 | 11753219_turquoise | killer cell lectin like receptor F1(KLRF1)                           | Homo sapiens |
| 3928 | 11753239_turquoise | scavenger receptor class A member 5(SCARA5)                          | Homo sapiens |
| 3929 | 11753241_turquoise | C-type lectin domain family 12 member A(CLEC12A)                     | Homo sapiens |
| 3930 | 11753266_turquoise | transcription elongation factor A3(TCEA3)                            | Homo sapiens |
| 3931 | 11753291_turquoise | CD44 molecule (Indian blood group)(CD44)                             | Homo sapiens |
| 3932 | 11753292_turquoise | CD44 molecule (Indian blood group)(CD44)                             | Homo sapiens |
| 3933 | 11753312_turquoise | DnaJ heat shock protein family (Hsp40) member C5 gamma(DNAJC5G)      | Homo sapiens |
| 3934 | 11753321_turquoise | TNFSF12-TNFSF13 readthrough(TNFSF12-TNFSF13)                         | Homo sapiens |
| 3935 | 11753322_brown     | diphthamide biosynthesis 5(DPH5)                                     | Homo sapiens |
| 3936 | 11753334_turquoise | BCL2 associated athanogene 1(BAG1)                                   | Homo sapiens |
| 3937 | 11753335_turquoise | transmembrane protein 177(TMEM177)                                   | Homo sapiens |
| 3938 | 11753345_blue      | cutC copper transporter(CUTC)                                        | Homo sapiens |
| 3939 | 11753348_turquoise | SAM domain, SH3 domain and nuclear localization signals 1(SAMSN1)    | Homo sapiens |
| 3940 | 11753399_turquoise | annexin A2(ANXA2)                                                    | Homo sapiens |
| 3941 | 11753404_turquoise | major histocompatibility complex, class I, E(HLA-E)                  | Homo sapiens |
| 3942 | 11753445_turquoise | heme oxygenase 1(HMOX1)                                              | Homo sapiens |
| 3943 | 11753446_turquoise | heme oxygenase 1(HMOX1)                                              | Homo sapiens |
| 3944 | 11753467_blue      | aminomethyltransferase(AMT)                                          | Homo sapiens |
| 3945 | 11753480_blue      | reticulon 4 interacting protein 1(RTN4IP1)                           | Homo sapiens |
| 3946 | 11753484_turquoise | killer cell lectin like receptor D1(KLRD1)                           | Homo sapiens |
| 3947 | 11753505_blue      | post-GPI attachment to proteins 2(PGAP2)                             | Homo sapiens |
| 3948 | 11753515_turquoise | interleukin 32(IL32)                                                 | Homo sapiens |

|      |                    |                                                                                        |              |
|------|--------------------|----------------------------------------------------------------------------------------|--------------|
| 3949 | 11753519_turquoise | gamma-secretase activating protein(GSAP)                                               | Homo sapiens |
| 3950 | 11753521_turquoise | RAB5C, member RAS oncogene family(RAB5C)                                               | Homo sapiens |
| 3951 | 11753534_turquoise | killer cell lectin like receptor D1(KLRD1)                                             | Homo sapiens |
| 3952 | 11753535_turquoise | killer cell lectin like receptor D1(KLRD1)                                             | Homo sapiens |
| 3953 | 11753549_turquoise | CKLF like MARVEL transmembrane domain containing 3(CMTM3)                              | Homo sapiens |
| 3954 | 11753555_turquoise | CD53 molecule(CD53)                                                                    | Homo sapiens |
| 3955 | 11753569_turquoise | leucine zipper tumor suppressor 1(LZTS1)                                               | Homo sapiens |
| 3956 | 11753575_turquoise | coenzyme Q7, hydroxylase(COQ7)                                                         | Homo sapiens |
| 3957 | 11753623_turquoise | RAP1B, member of RAS oncogene family(RAP1B)                                            | Homo sapiens |
| 3958 | 11753628_blue      | abhydrolase domain containing 11(ABHD11)                                               | Homo sapiens |
| 3959 | 11753675_turquoise | profilin 2(PFN2)                                                                       | Homo sapiens |
| 3960 | 11753722_turquoise | profilin 1(PFN1)                                                                       | Homo sapiens |
| 3961 | 11753727_turquoise | microRNA 6805(MIR6805)                                                                 | Homo sapiens |
| 3962 | 11753732_turquoise | polyamine oxidase(PAOX)                                                                | Homo sapiens |
| 3963 | 11753735_turquoise | thymosin beta 4, X-linked(TMSB4X)                                                      | Homo sapiens |
| 3964 | 11753755_brown     | ATP synthase, H <sup>+</sup> transporting, mitochondrial Fo complex subunit F2(ATP5J2) | Homo sapiens |
| 3965 | 11753776_turquoise | leukocyte associated immunoglobulin like receptor 2(LAIR2)                             | Homo sapiens |
| 3966 | 11753799_brown     | small integral membrane protein 11A(SMIM11A)                                           | Homo sapiens |
| 3967 | 11753800_brown     | small integral membrane protein 11A(SMIM11A)                                           | Homo sapiens |
| 3968 | 11753803_blue      | cytochrome c, somatic(CYCS)                                                            | Homo sapiens |
| 3969 | 11753810_turquoise | C-C motif chemokine ligand 5(CCL5)                                                     | Homo sapiens |
| 3970 | 11753832_yellow    | immunoglobulin kappa constant(IGKC)                                                    | Homo sapiens |
| 3971 | 11753843_brown     | NADH:ubiquinone oxidoreductase subunit A3(NDUFA3)                                      | Homo sapiens |
| 3972 | 11753844_brown     | NADH:ubiquinone oxidoreductase subunit A3(NDUFA3)                                      | Homo sapiens |
| 3973 | 11753856_turquoise | CDC28 protein kinase regulatory subunit 2(CKS2)                                        | Homo sapiens |
| 3974 | 11753858_turquoise | small nucleolar RNA, H/ACA box 44(SNORA44)                                             | Homo sapiens |
| 3975 | 11753859_turquoise | small nucleolar RNA, H/ACA box 44(SNORA44)                                             | Homo sapiens |
| 3976 | 11753868_turquoise | leukocyte specific transcript 1(LST1)                                                  | Homo sapiens |
| 3977 | 11753871_brown     | G protein subunit gamma 7(GNG7)                                                        | Homo sapiens |
| 3978 | 11753872_brown     | metallothionein 3(MT3)                                                                 | Homo sapiens |
| 3979 | 11753882_turquoise | interleukin 2 receptor subunit gamma(IL2RG)                                            | Homo sapiens |
| 3980 | 11753883_turquoise | interleukin 2 receptor subunit gamma(IL2RG)                                            | Homo sapiens |
| 3981 | 11753896_blue      | pyruvate dehydrogenase (lipoamide) alpha 1(PDHA1)                                      | Homo sapiens |
| 3982 | 11753898_turquoise | major histocompatibility complex, class II, DQ alpha 1(HLA-DQA1)                       | Homo sapiens |
| 3983 | 11753902_turquoise | actinin alpha 4(ACTN4)                                                                 | Homo sapiens |
| 3984 | 11753911_turquoise | transmembrane protein 242(TMEM242)                                                     | Homo sapiens |
| 3985 | 11753915_turquoise | SEL1L family member 3(SEL1L3)                                                          | Homo sapiens |
| 3986 | 11753918_turquoise | nucleoporin 85(NUP85)                                                                  | Homo sapiens |
| 3987 | 11753920_turquoise | apolipoprotein L1(APOL1)                                                               | Homo sapiens |
| 3988 | 11753923_turquoise | MBNL1 antisense RNA 1(MBNL1-AS1)                                                       | Homo sapiens |
| 3989 | 11753929_turquoise | ST3 beta-galactoside alpha-2,3-sialyltransferase 2(ST3GAL2)                            | Homo sapiens |
| 3990 | 11753936_turquoise | transient receptor potential cation channel subfamily M member 2(TRPM2)                | Homo sapiens |
| 3991 | 11753939_turquoise | proteasome subunit beta 10(PSMB10)                                                     | Homo sapiens |
| 3992 | 11753988_turquoise | sprouty RTK signaling antagonist 2(SPRY2)                                              | Homo sapiens |
| 3993 | 11753996_brown     | heat shock protein family E (Hsp10) member 1(HSPE1)                                    | Homo sapiens |
| 3994 | 11754015_brown     | translocase of inner mitochondrial membrane 50(TIMM50)                                 | Homo sapiens |
| 3995 | 11754016_brown     | translocase of inner mitochondrial membrane 50(TIMM50)                                 | Homo sapiens |
| 3996 | 11754023_blue      | cytochrome c oxidase subunit 7A2 like(COX7A2L)                                         | Homo sapiens |
| 3997 | 11754024_blue      | solute carrier family 25 member 11(SLC25A11)                                           | Homo sapiens |
| 3998 | 11754027_blue      | cytochrome c1(CYC1)                                                                    | Homo sapiens |

|      |                    |                                                               |              |
|------|--------------------|---------------------------------------------------------------|--------------|
| 3999 | 11754032_yellow    | microRNA 8071-1(MIR8071-1)                                    | Homo sapiens |
| 4000 | 11754034_brown     | reactive intermediate imine deaminase A homolog(RIDA)         | Homo sapiens |
| 4001 | 11754035_turquoise | interferon regulatory factor 1(IRF1)                          | Homo sapiens |
| 4002 | 11754064_turquoise | annexin A2(ANXA2)                                             | Homo sapiens |
| 4003 | 11754071_turquoise | transgelin 2(TAGLN2)                                          | Homo sapiens |
| 4004 | 11754105_turquoise | small nuclear ribonucleoprotein polypeptides B and B1(SNRPB)  | Homo sapiens |
| 4005 | 11754124_turquoise | coactosin like F-actin binding protein 1(COTL1)               | Homo sapiens |
| 4006 | 11754125_turquoise | coactosin like F-actin binding protein 1(COTL1)               | Homo sapiens |
| 4007 | 11754142_turquoise | microRNA 1244-1(MIR1244-1)                                    | Homo sapiens |
| 4008 | 11754145_yellow    | NA                                                            | NA           |
| 4009 | 11754153_turquoise | caspase 8(CASP8)                                              | Homo sapiens |
| 4010 | 11754161_brown     | phosphatidylinositol glycan anchor biosynthesis class P(PIGP) | Homo sapiens |
| 4011 | 11754170_turquoise | transforming growth factor beta regulator 1(TBRG1)            | Homo sapiens |
| 4012 | 11754181_turquoise | interleukin 2 receptor subunit gamma(IL2RG)                   | Homo sapiens |
| 4013 | 11754182_turquoise | interleukin 2 receptor subunit gamma(IL2RG)                   | Homo sapiens |
| 4014 | 11754202_turquoise | capping actin protein, gelsolin like(CAPG)                    | Homo sapiens |
| 4015 | 11754204_turquoise | peroxisomal biogenesis factor 11 alpha(PEX11A)                | Homo sapiens |
| 4016 | 11754205_turquoise | lysine acetyltransferase 6B(KAT6B)                            | Homo sapiens |
| 4017 | 11754217_turquoise | actin beta(ACTB)                                              | Homo sapiens |
| 4018 | 11754219_turquoise | signal induced proliferation associated 1 like 1(SIPA1L1)     | Homo sapiens |
| 4019 | 11754223_turquoise | transmembrane protein 35B(TMEM35B)                            | Homo sapiens |
| 4020 | 11754224_turquoise | RAS p21 protein activator 4B(RASA4B)                          | Homo sapiens |
| 4021 | 11754225_turquoise | Sec23 homolog B, coat complex II component(SEC23B)            | Homo sapiens |
| 4022 | 11754243_turquoise | H2A histone family member X(H2AFX)                            | Homo sapiens |
| 4023 | 11754246_turquoise | poly(A) binding protein cytoplasmic 1(PABPC1)                 | Homo sapiens |
| 4024 | 11754258_turquoise | lipoic acid synthetase(LIAS)                                  | Homo sapiens |
| 4025 | 11754266_turquoise | E2F transcription factor 3(E2F3)                              | Homo sapiens |
| 4026 | 11754270_turquoise | complement component 4B (Chido blood group), copy 2(C4B_2)    | Homo sapiens |
| 4027 | 11754272_blue      | small nuclear ribonucleoprotein polypeptide N(SNRPN)          | Homo sapiens |
| 4028 | 11754278_turquoise | cyclin G associated kinase(GAK)                               | Homo sapiens |
| 4029 | 11754295_turquoise | family with sequence similarity 107 member B(FAM107B)         | Homo sapiens |
| 4030 | 11754297_turquoise | TNF receptor superfamily member 1A(TNFRSF1A)                  | Homo sapiens |
| 4031 | 11754298_turquoise | casein kinase 1 delta(CSNK1D)                                 | Homo sapiens |
| 4032 | 11754313_turquoise | ADP ribosylation factor like GTPase 4C(ARL4C)                 | Homo sapiens |
| 4033 | 11754315_turquoise | thymosin beta 4, X-linked(TMSB4X)                             | Homo sapiens |
| 4034 | 11754317_turquoise | annexin A4(ANXA4)                                             | Homo sapiens |
| 4035 | 11754320_turquoise | structural maintenance of chromosomes 4(SMC4)                 | Homo sapiens |
| 4036 | 11754321_turquoise | solute carrier family 12 member 9(SLC12A9)                    | Homo sapiens |
| 4037 | 11754330_turquoise | interferon regulatory factor 2(IRF2)                          | Homo sapiens |
| 4038 | 11754339_turquoise | NAD synthetase 1(NADSYN1)                                     | Homo sapiens |
| 4039 | 11754348_turquoise | kelch domain containing 4(KLHDC4)                             | Homo sapiens |
| 4040 | 11754351_turquoise | cytohesin 1(CYTH1)                                            | Homo sapiens |
| 4041 | 11754352_turquoise | ring finger protein 213(RNF213)                               | Homo sapiens |
| 4042 | 11754358_turquoise | small nucleolar RNA host gene 4(SNHG4)                        | Homo sapiens |
| 4043 | 11754360_turquoise | ribonucleotide reductase regulatory subunit M2(RRM2)          | Homo sapiens |
| 4044 | 11754370_turquoise | synaptotagmin like 1(SYTL1)                                   | Homo sapiens |
| 4045 | 11754375_turquoise | sorting nexin 10(SNX10)                                       | Homo sapiens |
| 4046 | 11754379_turquoise | poly(ADP-ribose) polymerase family member 9(PARP9)            | Homo sapiens |
| 4047 | 11754381_blue      | tropomodulin 1(TMOD1)                                         | Homo sapiens |
| 4048 | 11754382_turquoise | small integral membrane protein 5(SMIM5)                      | Homo sapiens |

|      |                    |                                                                   |              |
|------|--------------------|-------------------------------------------------------------------|--------------|
| 4049 | 11754403_turquoise | poly(ADP-ribose) polymerase family member 14(PARP14)              | Homo sapiens |
| 4050 | 11754404_turquoise | poly(ADP-ribose) polymerase family member 14(PARP14)              | Homo sapiens |
| 4051 | 11754419_turquoise | nucleolus and neural progenitor protein(NEPRO)                    | Homo sapiens |
| 4052 | 11754434_turquoise | cyclin D3(CCND3)                                                  | Homo sapiens |
| 4053 | 11754444_brown     | cytochrome c oxidase subunit 6C(COX6C)                            | Homo sapiens |
| 4054 | 11754454_turquoise | LDL receptor related protein 10(LRP10)                            | Homo sapiens |
| 4055 | 11754461_turquoise | uncoupling protein 2(UCP2)                                        | Homo sapiens |
| 4056 | 11754471_turquoise | major histocompatibility complex, class II, DM beta(HLA-DMB)      | Homo sapiens |
| 4057 | 11754474_turquoise | pleckstrin(PLEK)                                                  | Homo sapiens |
| 4058 | 11754481_turquoise | coronin 7(CORO7)                                                  | Homo sapiens |
| 4059 | 11754489_brown     | NADH:ubiquinone oxidoreductase complex assembly factor 5(NDUFAF5) | Homo sapiens |
| 4060 | 11754491_turquoise | chromosome 16 open reading frame 46(C16orf46)                     | Homo sapiens |
| 4061 | 11754492_turquoise | phospholipase C beta 2(PLCB2)                                     | Homo sapiens |
| 4062 | 11754503_turquoise | choline/ethanolamine phosphotransferase 1(CEPT1)                  | Homo sapiens |
| 4063 | 11754510_blue      | voltage dependent anion channel 3(VDAC3)                          | Homo sapiens |
| 4064 | 11754524_turquoise | tissue factor pathway inhibitor 2(TFPI2)                          | Homo sapiens |
| 4065 | 11754551_turquoise | enolase 1(ENO1)                                                   | Homo sapiens |
| 4066 | 11754554_turquoise | enoyl-CoA hydratase domain containing 2(ECHDC2)                   | Homo sapiens |
| 4067 | 11754579_turquoise | pappalysin 1(PAPPA)                                               | Homo sapiens |
| 4068 | 11754584_turquoise | RAD9-HUS1-RAD1 interacting nuclear orphan 1(RHNO1)                | Homo sapiens |
| 4069 | 11754587_turquoise | FYN proto-oncogene, Src family tyrosine kinase(FYN)               | Homo sapiens |
| 4070 | 11754589_turquoise | exportin 6(XPO6)                                                  | Homo sapiens |
| 4071 | 11754592_turquoise | activating transcription factor 5(ATF5)                           | Homo sapiens |
| 4072 | 11754593_turquoise | tubulin beta 3 class III(TUBB3)                                   | Homo sapiens |
| 4073 | 11754598_blue      | DnaJ heat shock protein family (Hsp40) member A3(DNAJA3)          | Homo sapiens |
| 4074 | 11754603_turquoise | dual specificity phosphatase 18(DUSP18)                           | Homo sapiens |
| 4075 | 11754609_turquoise | stathmin 3(STMN3)                                                 | Homo sapiens |
| 4076 | 11754615_turquoise | ubiquitin fold modifier 1(UFM1)                                   | Homo sapiens |
| 4077 | 11754623_brown     | choline phosphotransferase 1(CHPT1)                               | Homo sapiens |
| 4078 | 11754627_turquoise | RAB37, member RAS oncogene family(RAB37)                          | Homo sapiens |
| 4079 | 11754630_turquoise | mixed lineage kinase domain like(MLKL)                            | Homo sapiens |
| 4080 | 11754637_turquoise | synaptotagmin like 1(SYTL1)                                       | Homo sapiens |
| 4081 | 11754644_turquoise | calponin 2(CNN2)                                                  | Homo sapiens |
| 4082 | 11754649_turquoise | IL2 inducible T-cell kinase(ITK)                                  | Homo sapiens |
| 4083 | 11754652_brown     | enoyl-CoA delta isomerase 2(ECI2)                                 | Homo sapiens |
| 4084 | 11754666_turquoise | coronin 1A(CORO1A)                                                | Homo sapiens |
| 4085 | 11754672_turquoise | checkpoint with forkhead and ring finger domains(CHFR)            | Homo sapiens |
| 4086 | 11754678_turquoise | solute carrier family 25 member 43(SLC25A43)                      | Homo sapiens |
| 4087 | 11754680_turquoise | mitogen-activated protein kinase kinase kinase 2(MAP3K2)          | Homo sapiens |
| 4088 | 11754681_turquoise | major histocompatibility complex, class II, DM beta(HLA-DMB)      | Homo sapiens |
| 4089 | 11754695_turquoise | phospholipase A2 group V(PLA2G5)                                  | Homo sapiens |
| 4090 | 11754707_brown     | CUE domain containing 2(CUEDC2)                                   | Homo sapiens |
| 4091 | 11754712_turquoise | TBC1 domain family member 10A(TBC1D10A)                           | Homo sapiens |
| 4092 | 11754716_turquoise | GATA zinc finger domain containing 2A(GATAD2A)                    | Homo sapiens |
| 4093 | 11754722_turquoise | SEPSECS antisense RNA 1 (head to head)(SEPSECS-AS1)               | Homo sapiens |
| 4094 | 11754724_turquoise | coiled-coil domain containing 88B(CCDC88B)                        | Homo sapiens |
| 4095 | 11754751_turquoise | BCL2 associated athanogene 1(BAG1)                                | Homo sapiens |
| 4096 | 11754752_turquoise | outer dense fiber of sperm tails 3B(ODF3B)                        | Homo sapiens |
| 4097 | 11754759_turquoise | chromatin target of PRMT1(CHTOP)                                  | Homo sapiens |
| 4098 | 11754760_turquoise | GRAM domain containing 1A(GRAMD1A)                                | Homo sapiens |

|      |                    |                                                                                   |              |
|------|--------------------|-----------------------------------------------------------------------------------|--------------|
| 4099 | 11754761_turquoise | high mobility group nucleosome binding domain 1(HMGN1)                            | Homo sapiens |
| 4100 | 11754762_turquoise | T-cell immune regulator 1, ATPase H+ transporting V0 subunit a3(TCIRG1)           | Homo sapiens |
| 4101 | 11754765_turquoise | microRNA 6080(MIR6080)                                                            | Homo sapiens |
| 4102 | 11754769_turquoise | BEN domain containing 5(BEND5)                                                    | Homo sapiens |
| 4103 | 11754777_turquoise | SH2 domain containing 2A(SH2D2A)                                                  | Homo sapiens |
| 4104 | 11754783_brown     | COMM domain containing 3(COMMD3)                                                  | Homo sapiens |
| 4105 | 11754798_turquoise | CD164 molecule(CD164)                                                             | Homo sapiens |
| 4106 | 11754802_turquoise | chromosome 12 open reading frame 76(C12orf76)                                     | Homo sapiens |
| 4107 | 11754808_turquoise | C3 and PZP like, alpha-2-macroglobulin domain containing 8(CPAMD8)                | Homo sapiens |
| 4108 | 11754814_turquoise | nucleoporin 93(NUP93)                                                             | Homo sapiens |
| 4109 | 11754822_turquoise | tyrosyl-DNA phosphodiesterase 1(TDP1)                                             | Homo sapiens |
| 4110 | 11754828_turquoise | butyrophilin subfamily 2 member A2(BTN2A2)                                        | Homo sapiens |
| 4111 | 11754833_turquoise | toll like receptor 2(TLR2)                                                        | Homo sapiens |
| 4112 | 11754835_turquoise | immunoglobulin superfamily member 21(IGSF21)                                      | Homo sapiens |
| 4113 | 11754839_turquoise | ubiquitin specific peptidase 54(USP54)                                            | Homo sapiens |
| 4114 | 11754842_turquoise | meiotic double-stranded break formation protein 1(MEI1)                           | Homo sapiens |
| 4115 | 11754844_blue      | COP9 signalosome subunit 5(COPS5)                                                 | Homo sapiens |
| 4116 | 11754859_turquoise | RUN and cysteine rich domain containing beclin 1 interacting protein like(RUBCNL) | Homo sapiens |
| 4117 | 11754861_brown     | succinate-CoA ligase alpha subunit(SUCLG1)                                        | Homo sapiens |
| 4118 | 11754869_turquoise | zinc finger protein 267(ZNF267)                                                   | Homo sapiens |
| 4119 | 11754870_turquoise | Mab-21 domain containing 1(MB21D1)                                                | Homo sapiens |
| 4120 | 11754881_turquoise | signal regulatory protein gamma(SIRPG)                                            | Homo sapiens |
| 4121 | 11754884_turquoise | WD repeat and FYVE domain containing 1(WDFY1)                                     | Homo sapiens |
| 4122 | 11754887_turquoise | methionine sulfoxide reductase B3(MSRB3)                                          | Homo sapiens |
| 4123 | 11754888_blue      | adenylosuccinate synthase like 1(ADSSL1)                                          | Homo sapiens |
| 4124 | 11754910_turquoise | MICAL like 2(MICALL2)                                                             | Homo sapiens |
| 4125 | 11754917_turquoise | SP100 nuclear antigen(SP100)                                                      | Homo sapiens |
| 4126 | 11754920_turquoise | vesicular, overexpressed in cancer, prosurvival protein 1(VOPP1)                  | Homo sapiens |
| 4127 | 11754925_turquoise | spleen associated tyrosine kinase(SYK)                                            | Homo sapiens |
| 4128 | 11754942_turquoise | chromosome 17 open reading frame 62(C17orf62)                                     | Homo sapiens |
| 4129 | 11754945_turquoise | transketolase(TKT)                                                                | Homo sapiens |
| 4130 | 11754946_turquoise | chromosome 7 open reading frame 49(C7orf49)                                       | Homo sapiens |
| 4131 | 11754951_turquoise | nuclear receptor coactivator 7(NCOA7)                                             | Homo sapiens |
| 4132 | 11754964_brown     | NADH:ubiquinone oxidoreductase subunit A10(NDUFA10)                               | Homo sapiens |
| 4133 | 11754972_turquoise | bromodomain adjacent to zinc finger domain 2A(BAZ2A)                              | Homo sapiens |
| 4134 | 11754976_turquoise | canopy FGF signaling regulator 3(CNPY3)                                           | Homo sapiens |
| 4135 | 11754989_turquoise | Dmx like 2(DMXL2)                                                                 | Homo sapiens |
| 4136 | 11754992_turquoise | chromodomain helicase DNA binding protein 1(CHD1)                                 | Homo sapiens |
| 4137 | 11754998_turquoise | multiple C2 and transmembrane domain containing 1(MCTP1)                          | Homo sapiens |
| 4138 | 11755010_turquoise | POC1B-GALNT4 readthrough(POC1B-GALNT4)                                            | Homo sapiens |
| 4139 | 11755012_turquoise | CDC42 small effector 2(CDC42SE2)                                                  | Homo sapiens |
| 4140 | 11755013_turquoise | TNF receptor superfamily member 1B(TNFRSF1B)                                      | Homo sapiens |
| 4141 | 11755018_blue      | protein phosphatase 1 catalytic subunit gamma(PPP1CC)                             | Homo sapiens |
| 4142 | 11755022_turquoise | ADP ribosylation factor like GTPase 6 interacting protein 1(ARL6IP1)              | Homo sapiens |
| 4143 | 11755032_turquoise | ArfGAP with SH3 domain, ankyrin repeat and PH domain 1(ASAP1)                     | Homo sapiens |
| 4144 | 11755036_turquoise | 2',3'-cyclic nucleotide 3' phosphodiesterase(CNP)                                 | Homo sapiens |
| 4145 | 11755043_turquoise | gamma-secretase activating protein(GSAP)                                          | Homo sapiens |
| 4146 | 11755044_turquoise | gamma-secretase activating protein(GSAP)                                          | Homo sapiens |
| 4147 | 11755045_turquoise | ankyrin repeat domain 13A(ANKRD13A)                                               | Homo sapiens |
| 4148 | 11755054_turquoise | runt related transcription factor 3(RUNX3)                                        | Homo sapiens |

|      |                    |                                                                                       |              |
|------|--------------------|---------------------------------------------------------------------------------------|--------------|
| 4149 | 11755058_turquoise | bromodomain adjacent to zinc finger domain 1A(BAZ1A)                                  | Homo sapiens |
| 4150 | 11755059_turquoise | transcription factor 3(TCF3)                                                          | Homo sapiens |
| 4151 | 11755070_turquoise | caspase recruitment domain family member 8(CARD8)                                     | Homo sapiens |
| 4152 | 11755075_turquoise | NAD synthetase 1(NADSYN1)                                                             | Homo sapiens |
| 4153 | 11755076_turquoise | ORAI calcium release-activated calcium modulator 2(ORAI2)                             | Homo sapiens |
| 4154 | 11755078_turquoise | transcriptional adaptor 2B(TADA2B)                                                    | Homo sapiens |
| 4155 | 11755091_turquoise | ATP binding cassette subfamily A member 7(ABCA7)                                      | Homo sapiens |
| 4156 | 11755105_turquoise | diacylglycerol kinase zeta(DGKZ)                                                      | Homo sapiens |
| 4157 | 11755116_turquoise | abhydrolase domain containing 11(ABHD11)                                              | Homo sapiens |
| 4158 | 11755117_turquoise | F-box and leucine rich repeat protein 22(FBLX22)                                      | Homo sapiens |
| 4159 | 11755121_turquoise | organic solute carrier partner 1(OSCP1)                                               | Homo sapiens |
| 4160 | 11755135_turquoise | abhydrolase domain containing 1(ABHD1)                                                | Homo sapiens |
| 4161 | 11755137_turquoise | mitochondrial calcium uniporter dominant negative beta subunit(MCUB)                  | Homo sapiens |
| 4162 | 11755147_turquoise | signal transducer and activator of transcription 2(STAT2)                             | Homo sapiens |
| 4163 | 11755148_turquoise | Dmx like 2(DMXL2)                                                                     | Homo sapiens |
| 4164 | 11755151_turquoise | aryl hydrocarbon receptor nuclear translocator like(ARNTL)                            | Homo sapiens |
| 4165 | 11755175_turquoise | heat shock protein family A (Hsp70) member 12A(HSPA12A)                               | Homo sapiens |
| 4166 | 11755180_turquoise | transcription factor 7 (T-cell specific, HMG-box)(TCF7)                               | Homo sapiens |
| 4167 | 11755222_turquoise | G protein subunit alpha 13(GNA13)                                                     | Homo sapiens |
| 4168 | 11755231_turquoise | LCK proto-oncogene, Src family tyrosine kinase(LCK)                                   | Homo sapiens |
| 4169 | 11755235_turquoise | fatty acyl-CoA reductase 2(FAR2)                                                      | Homo sapiens |
| 4170 | 11755237_turquoise | protein phosphatase, Mg <sup>2+</sup> /Mn <sup>2+</sup> dependent 1M(PPM1M)           | Homo sapiens |
| 4171 | 11755246_turquoise | growth regulation by estrogen in breast cancer 1(GREB1)                               | Homo sapiens |
| 4172 | 11755247_turquoise | DAN domain BMP antagonist family member 5(DAND5)                                      | Homo sapiens |
| 4173 | 11755265_turquoise | 5'-nucleotidase domain containing 1(NT5DC1)                                           | Homo sapiens |
| 4174 | 11755266_blue      | succinate-CoA ligase ADP-forming beta subunit(SUCLA2)                                 | Homo sapiens |
| 4175 | 11755269_brown     | URGCP-MRPS24 readthrough(URGCP-MRPS24)                                                | Homo sapiens |
| 4176 | 11755279_turquoise | major histocompatibility complex, class II, DP beta 1(HLA-DPB1)                       | Homo sapiens |
| 4177 | 11755280_turquoise | ferritin light chain(FTL)                                                             | Homo sapiens |
| 4178 | 11755281_turquoise | transforming growth factor beta induced(TGFBI)                                        | Homo sapiens |
| 4179 | 11755291_turquoise | DENN domain containing 2D(DENND2D)                                                    | Homo sapiens |
| 4180 | 11755292_turquoise | cytochrome b561 family member A3(CYB561A3)                                            | Homo sapiens |
| 4181 | 11755303_turquoise | major histocompatibility complex, class I, A(HLA-A)                                   | Homo sapiens |
| 4182 | 11755315_turquoise | arginyl aminopeptidase(RNPEP)                                                         | Homo sapiens |
| 4183 | 11755319_turquoise | ankyrin repeat domain 13D(ANKRD13D)                                                   | Homo sapiens |
| 4184 | 11755320_turquoise | ankyrin repeat domain 13D(ANKRD13D)                                                   | Homo sapiens |
| 4185 | 11755326_turquoise | abhydrolase domain containing 16A(ABHD16A)                                            | Homo sapiens |
| 4186 | 11755327_turquoise | family with sequence similarity 115, member C pseudogene(LOC154761)                   | Homo sapiens |
| 4187 | 11755331_turquoise | ankyrin 2(ANK2)                                                                       | Homo sapiens |
| 4188 | 11755342_turquoise | microRNA 1292(MIR1292)                                                                | Homo sapiens |
| 4189 | 11755343_turquoise | SET domain and mariner transposase fusion gene(SETMAR)                                | Homo sapiens |
| 4190 | 11755344_turquoise | major histocompatibility complex, class I, A(HLA-A)                                   | Homo sapiens |
| 4191 | 11755346_brown     | ATP synthase, H <sup>+</sup> transporting, mitochondrial F1 complex, O subunit(ATP5O) | Homo sapiens |
| 4192 | 11755347_brown     | secretion associated Ras related GTPase 1B(SAR1B)                                     | Homo sapiens |
| 4193 | 11755355_turquoise | RCSD domain containing 1(RCSD1)                                                       | Homo sapiens |
| 4194 | 11755357_turquoise | aconitase 1(ACO1)                                                                     | Homo sapiens |
| 4195 | 11755361_turquoise | de-etiolated homolog 1 (Arabidopsis)(DET1)                                            | Homo sapiens |
| 4196 | 11755373_turquoise | enoyl-CoA hydratase domain containing 2(ECHDC2)                                       | Homo sapiens |
| 4197 | 11755374_turquoise | HECT and RLD domain containing E3 ubiquitin protein ligase 5(HERC5)                   | Homo sapiens |
| 4198 | 11755382_yellow    | immunoglobulin lambda variable 1-44(IGLV1-44)                                         | Homo sapiens |

|      |                    |                                                                                   |              |
|------|--------------------|-----------------------------------------------------------------------------------|--------------|
| 4199 | 11755387_turquoise | SAC1 suppressor of actin mutations 1-like (yeast)(SACM1L)                         | Homo sapiens |
| 4200 | 11755391_turquoise | H2A histone family member Y(H2AFY)                                                | Homo sapiens |
| 4201 | 11755405_turquoise | RUN and cysteine rich domain containing beclin 1 interacting protein like(RUBCNL) | Homo sapiens |
| 4202 | 11755411_turquoise | inhibitor of kappa light polypeptide gene enhancer in B-cells, kinase beta(IKBKB) | Homo sapiens |
| 4203 | 11755412_turquoise | inhibitor of kappa light polypeptide gene enhancer in B-cells, kinase beta(IKBKB) | Homo sapiens |
| 4204 | 11755417_turquoise | KIAA0922(KIAA0922)                                                                | Homo sapiens |
| 4205 | 11755422_turquoise | CD6 molecule(CD6)                                                                 | Homo sapiens |
| 4206 | 11755425_blue      | family with sequence similarity 179 member B(FAM179B)                             | Homo sapiens |
| 4207 | 11755426_turquoise | Sec61 translocon alpha 1 subunit(SEC61A1)                                         | Homo sapiens |
| 4208 | 11755433_turquoise | uncharacterized LOC100505585(LOC100505585)                                        | Homo sapiens |
| 4209 | 11755443_turquoise | monoamine oxidase A(MAOA)                                                         | Homo sapiens |
| 4210 | 11755458_brown     | HD domain containing 2(HDDC2)                                                     | Homo sapiens |
| 4211 | 11755469_turquoise | minichromosome maintenance complex component 7(MCM7)                              | Homo sapiens |
| 4212 | 11755474_turquoise | ADAM metallopeptidase domain 15(ADAM15)                                           | Homo sapiens |
| 4213 | 11755476_turquoise | nicotinamide nucleotide adenylyltransferase 3(NMNAT3)                             | Homo sapiens |
| 4214 | 11755481_turquoise | DNA helicase B(HELB)                                                              | Homo sapiens |
| 4215 | 11755482_turquoise | G protein-coupled receptor 132(GPR132)                                            | Homo sapiens |
| 4216 | 11755483_turquoise | protein phosphatase 1 regulatory subunit 21(PPP1R21)                              | Homo sapiens |
| 4217 | 11755522_turquoise | leupaxin(LPXN)                                                                    | Homo sapiens |
| 4218 | 11755523_turquoise | RNA binding motif protein 47(RBM47)                                               | Homo sapiens |
| 4219 | 11755533_turquoise | adhesion G protein-coupled receptor A3(ADGRA3)                                    | Homo sapiens |
| 4220 | 11755546_turquoise | LFNG O-fucosylpeptide 3-beta-N-acetylglucosaminyltransferase(LFNG)                | Homo sapiens |
| 4221 | 11755547_turquoise | serine/threonine kinase 33(STK33)                                                 | Homo sapiens |
| 4222 | 11755549_turquoise | semaphorin 6D(SEMA6D)                                                             | Homo sapiens |
| 4223 | 11755556_turquoise | exocyst complex component 2(EXOC2)                                                | Homo sapiens |
| 4224 | 11755564_turquoise | C-C motif chemokine ligand 3 like 3(CCL3L3)                                       | Homo sapiens |
| 4225 | 11755577_turquoise | meiotic double-stranded break formation protein 1(ME11)                           | Homo sapiens |
| 4226 | 11755587_turquoise | tripartite motif containing 22(TRIM22)                                            | Homo sapiens |
| 4227 | 11755606_turquoise | IFI30, lysosomal thiol reductase(IFI30)                                           | Homo sapiens |
| 4228 | 11755615_turquoise | Janus kinase and microtubule interacting protein 3(JAKMIP3)                       | Homo sapiens |
| 4229 | 11755616_turquoise | solute carrier family 8 member B1(SLC8B1)                                         | Homo sapiens |
| 4230 | 11755622_turquoise | roundabout guidance receptor 4(ROBO4)                                             | Homo sapiens |
| 4231 | 11755631_turquoise | required for meiotic nuclear division 1 homolog(RMND1)                            | Homo sapiens |
| 4232 | 11755641_turquoise | post-GPI attachment to proteins 1(PGAP1)                                          | Homo sapiens |
| 4233 | 11755646_turquoise | sialic acid binding Ig like lectin 1(SIGLEC1)                                     | Homo sapiens |
| 4234 | 11755671_turquoise | synaptotagmin like 2(SYTL2)                                                       | Homo sapiens |
| 4235 | 11755676_turquoise | interaction protein for cytohesin exchange factors 1(IPCEF1)                      | Homo sapiens |
| 4236 | 11755703_turquoise | zinc finger protein 287(ZNF287)                                                   | Homo sapiens |
| 4237 | 11755705_turquoise | small integral membrane protein 5(SMIM5)                                          | Homo sapiens |
| 4238 | 11755709_turquoise | La ribonucleoprotein domain family member 6(LARP6)                                | Homo sapiens |
| 4239 | 11755710_brown     | GTP binding protein 8 (putative)(GTPBP8)                                          | Homo sapiens |
| 4240 | 11755717_turquoise | docking protein 2(DOK2)                                                           | Homo sapiens |
| 4241 | 11755718_turquoise | histone deacetylase 1(HDAC1)                                                      | Homo sapiens |
| 4242 | 11755747_turquoise | placenta specific 8(PLAC8)                                                        | Homo sapiens |
| 4243 | 11755748_turquoise | placenta specific 8(PLAC8)                                                        | Homo sapiens |
| 4244 | 11755755_turquoise | integrator complex subunit 6 like(INTS6L)                                         | Homo sapiens |
| 4245 | 11755758_turquoise | NLR family CARD domain containing 5(NLRC5)                                        | Homo sapiens |
| 4246 | 11755762_turquoise | transmembrane protein 2(TMEM2)                                                    | Homo sapiens |
| 4247 | 11755766_turquoise | sorting nexin family member 30(SNX30)                                             | Homo sapiens |
| 4248 | 11755778_turquoise | roundabout guidance receptor 4(ROBO4)                                             | Homo sapiens |

|      |                    |                                                                                    |              |
|------|--------------------|------------------------------------------------------------------------------------|--------------|
| 4249 | 11755788_blue      | kinesin family member 21A(KIF21A)                                                  | Homo sapiens |
| 4250 | 11755811_turquoise | zinc finger protein 266(ZNF266)                                                    | Homo sapiens |
| 4251 | 11755818_turquoise | FYVE and coiled-coil domain containing 1(FYCO1)                                    | Homo sapiens |
| 4252 | 11755819_turquoise | DEXD/H-box helicase 58(DDX58)                                                      | Homo sapiens |
| 4253 | 11755830_turquoise | myosin IG(MYO1G)                                                                   | Homo sapiens |
| 4254 | 11755858_turquoise | membrane spanning 4-domains A1(MS4A1)                                              | Homo sapiens |
| 4255 | 11755874_turquoise | bora, aurora kinase A activator(BORA)                                              | Homo sapiens |
| 4256 | 11755876_brown     | interferon related developmental regulator 2(IFRD2)                                | Homo sapiens |
| 4257 | 11755882_turquoise | solute carrier family 35 member B3(SLC35B3)                                        | Homo sapiens |
| 4258 | 11755888_turquoise | regucalcin(RGN)                                                                    | Homo sapiens |
| 4259 | 11755902_turquoise | transient receptor potential cation channel subfamily V member 2(TRPV2)            | Homo sapiens |
| 4260 | 11755903_turquoise | NEDD4 binding protein 2 like 1(N4BP2L1)                                            | Homo sapiens |
| 4261 | 11755908_turquoise | immunoglobulin superfamily member 3(IGSF3)                                         | Homo sapiens |
| 4262 | 11755912_turquoise | YEATS domain containing 2(YEATS2)                                                  | Homo sapiens |
| 4263 | 11755915_turquoise | HPS3, biogenesis of lysosomal organelles complex 2 subunit 1(HPS3)                 | Homo sapiens |
| 4264 | 11755932_turquoise | hematopoietic cell-specific Lyn substrate 1(HCLS1)                                 | Homo sapiens |
| 4265 | 11755933_turquoise | major histocompatibility complex, class I, B(HLA-B)                                | Homo sapiens |
| 4266 | 11755943_turquoise | vimentin(VIM)                                                                      | Homo sapiens |
| 4267 | 11755952_turquoise | arrestin beta 2(ARRB2)                                                             | Homo sapiens |
| 4268 | 11755960_blue      | leucine rich repeat containing 39(LRRC39)                                          | Homo sapiens |
| 4269 | 11755966_turquoise | major histocompatibility complex, class I, B(HLA-B)                                | Homo sapiens |
| 4270 | 11755980_blue      | solute carrier family 25 member 3(SLC25A3)                                         | Homo sapiens |
| 4271 | 11755990_turquoise | calpain 12(CAPN12)                                                                 | Homo sapiens |
| 4272 | 11755997_turquoise | sterile alpha motif domain containing 9 like(SAMD9L)                               | Homo sapiens |
| 4273 | 11756006_turquoise | LCK proto-oncogene, Src family tyrosine kinase(LCK)                                | Homo sapiens |
| 4274 | 11756011_turquoise | protein tyrosine phosphatase, receptor type J(PTPRJ)                               | Homo sapiens |
| 4275 | 11756061_turquoise | small nucleolar RNA, H/ACA box 64(SNORA64)                                         | Homo sapiens |
| 4276 | 11756068_turquoise | beta-site APP-cleaving enzyme 2(BACE2)                                             | Homo sapiens |
| 4277 | 11756071_turquoise | actin beta(ACTB)                                                                   | Homo sapiens |
| 4278 | 11756073_turquoise | major histocompatibility complex, class II, DP beta 1(HLA-DPB1)                    | Homo sapiens |
| 4279 | 11756077_turquoise | nudE neurodevelopment protein 1(NDE1)                                              | Homo sapiens |
| 4280 | 11756083_turquoise | major histocompatibility complex, class II, DQ alpha 1(HLA-DQA1)                   | Homo sapiens |
| 4281 | 11756089_turquoise | macrophage scavenger receptor 1(MSR1)                                              | Homo sapiens |
| 4282 | 11756096_blue      | solute carrier family 25 member 4(SLC25A4)                                         | Homo sapiens |
| 4283 | 11756099_blue      | lactate dehydrogenase B(LDHB)                                                      | Homo sapiens |
| 4284 | 11756109_turquoise | mannosyl (alpha-1,6-)-glycoprotein beta-1,2-N-acetylglucosaminyltransferase(MGAT2) | Homo sapiens |
| 4285 | 11756125_brown     | NADH:ubiquinone oxidoreductase subunit A1(NDUFA1)                                  | Homo sapiens |
| 4286 | 11756138_turquoise | hexokinase 2(HK2)                                                                  | Homo sapiens |
| 4287 | 11756146_turquoise | S100 calcium binding protein A4(S100A4)                                            | Homo sapiens |
| 4288 | 11756150_turquoise | beta-2-microglobulin(B2M)                                                          | Homo sapiens |
| 4289 | 11756151_turquoise | beta-2-microglobulin(B2M)                                                          | Homo sapiens |
| 4290 | 11756168_turquoise | RAB13, member RAS oncogene family(RAB13)                                           | Homo sapiens |
| 4291 | 11756170_turquoise | chromosome X open reading frame 38(CXorf38)                                        | Homo sapiens |
| 4292 | 11756175_turquoise | NSE4 homolog A, SMC5-SMC6 complex component(NSMCE4A)                               | Homo sapiens |
| 4293 | 11756176_turquoise | eukaryotic translation initiation factor 4A3(EIF4A3)                               | Homo sapiens |
| 4294 | 11756177_turquoise | CKLF like MARVEL transmembrane domain containing 6(CMTM6)                          | Homo sapiens |
| 4295 | 11756178_turquoise | CKLF like MARVEL transmembrane domain containing 6(CMTM6)                          | Homo sapiens |
| 4296 | 11756181_turquoise | tyrosine 3-monooxygenase/tryptophan 5-monooxygenase activation protein zeta(YWH)   | Homo sapiens |
| 4297 | 11756183_blue      | solute carrier family 25 member 11(SLC25A11)                                       | Homo sapiens |
| 4298 | 11756211_brown     | Hikeshi, heat shock protein nuclear import factor(HIKESHI)                         | Homo sapiens |



|      |                    |                                                                                  |              |
|------|--------------------|----------------------------------------------------------------------------------|--------------|
| 4299 | 11756223_turquoise | DExD-box helicase 21(DDX21)                                                      | Homo sapiens |
| 4300 | 11756225_turquoise | DnaJ heat shock protein family (Hsp40) member B6(DNAJB6)                         | Homo sapiens |
| 4301 | 11756226_turquoise | GRIP1 associated protein 1(GRIPAP1)                                              | Homo sapiens |
| 4302 | 11756228_turquoise | NECAP endocytosis associated 2(NECAP2)                                           | Homo sapiens |
| 4303 | 11756232_blue      | voltage dependent anion channel 2(VDAC2)                                         | Homo sapiens |
| 4304 | 11756239_blue      | mitochondrial ribosomal protein S35(MRPS35)                                      | Homo sapiens |
| 4305 | 11756243_turquoise | dual adaptor of phosphotyrosine and 3-phosphoinositides 1(DAPP1)                 | Homo sapiens |
| 4306 | 11756245_turquoise | annexin A5(ANXA5)                                                                | Homo sapiens |
| 4307 | 11756255_turquoise | tyrosine 3-monooxygenase/tryptophan 5-monooxygenase activation protein eta(YWHA) | Homo sapiens |
| 4308 | 11756280_turquoise | nudix hydrolase 5(NUDT5)                                                         | Homo sapiens |
| 4309 | 11756281_turquoise | CD7 molecule(CD7)                                                                | Homo sapiens |
| 4310 | 11756283_turquoise | cell division cycle and apoptosis regulator 1(CCAR1)                             | Homo sapiens |
| 4311 | 11756287_turquoise | acyloxyacyl hydrolase(AOAH)                                                      | Homo sapiens |
| 4312 | 11756289_turquoise | CCM2 scaffolding protein(CCM2)                                                   | Homo sapiens |
| 4313 | 11756292_turquoise | cathepsin W(CTSW)                                                                | Homo sapiens |
| 4314 | 11756296_blue      | mitochondrial fission factor(MFF)                                                | Homo sapiens |
| 4315 | 11756302_turquoise | CD37 molecule(CD37)                                                              | Homo sapiens |
| 4316 | 11756303_turquoise | SH3 domain and tetratricopeptide repeats 1(SH3TC1)                               | Homo sapiens |
| 4317 | 11756306_turquoise | poly(ADP-ribose) polymerase family member 9(PARP9)                               | Homo sapiens |
| 4318 | 11756309_turquoise | RAB24, member RAS oncogene family(RAB24)                                         | Homo sapiens |
| 4319 | 11756317_turquoise | zinc finger protein 276(ZNF276)                                                  | Homo sapiens |
| 4320 | 11756320_turquoise | nudix hydrolase 13(NUDT13)                                                       | Homo sapiens |
| 4321 | 11756322_turquoise | CNDP dipeptidase 2 (metallopeptidase M20 family)(CNDP2)                          | Homo sapiens |
| 4322 | 11756327_turquoise | ribosomal protein S19(RPS19)                                                     | Homo sapiens |
| 4323 | 11756330_turquoise | DExD/H-box helicase 58(DDX58)                                                    | Homo sapiens |
| 4324 | 11756351_brown     | superoxide dismutase 1, soluble(SOD1)                                            | Homo sapiens |
| 4325 | 11756358_turquoise | polo like kinase 3(PLK3)                                                         | Homo sapiens |
| 4326 | 11756362_turquoise | Fc fragment of IgG receptor 1c, pseudogene(FCGR1CP)                              | Homo sapiens |
| 4327 | 11756363_turquoise | NCK associated protein 1 like(NCKAP1L)                                           | Homo sapiens |
| 4328 | 11756367_blue      | solute carrier family 25 member 4(SLC25A4)                                       | Homo sapiens |
| 4329 | 11756369_turquoise | mitochondrial trans-2-enoyl-CoA reductase(MECR)                                  | Homo sapiens |
| 4330 | 11756375_grey      | ETS variant 7(ETV7)                                                              | Homo sapiens |
| 4331 | 11756386_turquoise | WD repeat domain 1(WDR1)                                                         | Homo sapiens |
| 4332 | 11756387_turquoise | ADP ribosylation factor like GTPase 4A(ARL4A)                                    | Homo sapiens |
| 4333 | 11756391_turquoise | microtubule interacting and trafficking domain containing 1(MITD1)               | Homo sapiens |
| 4334 | 11756393_turquoise | coronin 1A(CORO1A)                                                               | Homo sapiens |
| 4335 | 11756401_turquoise | family with sequence similarity 49 member B(FAM49B)                              | Homo sapiens |
| 4336 | 11756411_turquoise | stabilin 1(STAB1)                                                                | Homo sapiens |
| 4337 | 11756417_turquoise | kizuna centrosomal protein(KIZ)                                                  | Homo sapiens |
| 4338 | 11756429_turquoise | oligosaccharyltransferase complex non-catalytic subunit(OSTC)                    | Homo sapiens |
| 4339 | 11756434_turquoise | DNA methyltransferase 1(DNMT1)                                                   | Homo sapiens |
| 4340 | 11756449_turquoise | RANBP2-type and C3HC4-type zinc finger containing 1(RBCK1)                       | Homo sapiens |
| 4341 | 11756453_turquoise | SH2 domain containing 3C(SH2D3C)                                                 | Homo sapiens |
| 4342 | 11756467_turquoise | transmembrane protein 50A(TMEM50A)                                               | Homo sapiens |
| 4343 | 11756479_turquoise | ribonuclease T2(RNASET2)                                                         | Homo sapiens |
| 4344 | 11756485_turquoise | taxilin alpha(TXLNA)                                                             | Homo sapiens |
| 4345 | 11756499_blue      | kelch domain containing 2(KLHDC2)                                                | Homo sapiens |
| 4346 | 11756500_brown     | diphthamide biosynthesis 5(DPH5)                                                 | Homo sapiens |
| 4347 | 11756501_blue      | transmembrane protein 38B(TMEM38B)                                               | Homo sapiens |
| 4348 | 11756512_turquoise | zinc fingers and homeoboxes 3(ZHX3)                                              | Homo sapiens |

|      |           |           |                                                                                |              |
|------|-----------|-----------|--------------------------------------------------------------------------------|--------------|
| 4349 | 11756523_ | turquoise | shisa family member 5(SHISA5)                                                  | Homo sapiens |
| 4350 | 11756525_ | turquoise | IDI2 antisense RNA 1(IDI2-AS1)                                                 | Homo sapiens |
| 4351 | 11756526_ | brown     | mitochondrial ribosomal protein L48(MRPL48)                                    | Homo sapiens |
| 4352 | 11756532_ | turquoise | phosphatidylinositol-4,5-bisphosphate 3-kinase catalytic subunit delta(PIK3CD) | Homo sapiens |
| 4353 | 11756535_ | turquoise | solute carrier family 25 member 45(SLC25A45)                                   | Homo sapiens |
| 4354 | 11756543_ | turquoise | nuclear RNA export factor 1(NXF1)                                              | Homo sapiens |
| 4355 | 11756564_ | turquoise | ancient ubiquitous protein 1(AUP1)                                             | Homo sapiens |
| 4356 | 11756572_ | turquoise | interferon regulatory factor 3(IRF3)                                           | Homo sapiens |
| 4357 | 11756581_ | turquoise | protease, serine 23(PRSS23)                                                    | Homo sapiens |
| 4358 | 11756593_ | blue      | uroporphyrinogen decarboxylase(UROD)                                           | Homo sapiens |
| 4359 | 11756603_ | turquoise | family with sequence similarity 206 member A(FAM206A)                          | Homo sapiens |
| 4360 | 11756613_ | turquoise | semaphorin 6A(SEMA6A)                                                          | Homo sapiens |
| 4361 | 11756617_ | turquoise | TAP binding protein(TAPBP)                                                     | Homo sapiens |
| 4362 | 11756618_ | turquoise | TAP binding protein(TAPBP)                                                     | Homo sapiens |
| 4363 | 11756626_ | turquoise | ZW10 interacting kinetochore protein(ZWINT)                                    | Homo sapiens |
| 4364 | 11756632_ | turquoise | granulysin(GNLY)                                                               | Homo sapiens |
| 4365 | 11756636_ | turquoise | PC-esterase domain containing 1A(PCED1A)                                       | Homo sapiens |
| 4366 | 11756641_ | turquoise | zinc finger protein 256(ZNF256)                                                | Homo sapiens |
| 4367 | 11756645_ | turquoise | C-X-C motif chemokine ligand 16(CXCL16)                                        | Homo sapiens |
| 4368 | 11756652_ | brown     | N-terminal Xaa-Pro-Lys N-methyltransferase 1(NTMT1)                            | Homo sapiens |
| 4369 | 11756655_ | turquoise | malonyl-CoA-acyl carrier protein transacylase(MCAT)                            | Homo sapiens |
| 4370 | 11756658_ | yellow    | marginal zone B and B1 cell specific protein(MZB1)                             | Homo sapiens |
| 4371 | 11756668_ | turquoise | family with sequence similarity 213 member A(FAM213A)                          | Homo sapiens |
| 4372 | 11756683_ | turquoise | CD1e molecule(CD1E)                                                            | Homo sapiens |
| 4373 | 11756687_ | brown     | mitochondrial ribosomal protein L46(MRPL46)                                    | Homo sapiens |
| 4374 | 11756694_ | turquoise | ring finger protein 44(RNF44)                                                  | Homo sapiens |
| 4375 | 11756702_ | turquoise | cytochrome P450 family 39 subfamily A member 1(CYP39A1)                        | Homo sapiens |
| 4376 | 11756709_ | turquoise | Bruton tyrosine kinase(BTK)                                                    | Homo sapiens |
| 4377 | 11756712_ | turquoise | acid phosphatase 2, lysosomal(ACP2)                                            | Homo sapiens |
| 4378 | 11756722_ | blue      | stomatin like 2(STOML2)                                                        | Homo sapiens |
| 4379 | 11756725_ | turquoise | shisa family member 5(SHISA5)                                                  | Homo sapiens |
| 4380 | 11756741_ | turquoise | SH3 domain binding glutamate rich protein like(SH3BGRL)                        | Homo sapiens |
| 4381 | 11756746_ | turquoise | A-kinase interacting protein 1(AKIP1)                                          | Homo sapiens |
| 4382 | 11756757_ | brown     | short chain dehydrogenase/reductase family 39U member 1(SDR39U1)               | Homo sapiens |
| 4383 | 11756765_ | turquoise | BCL2 like 13(BCL2L13)                                                          | Homo sapiens |
| 4384 | 11756766_ | turquoise | CD74 molecule(CD74)                                                            | Homo sapiens |
| 4385 | 11756767_ | turquoise | primary cilia formation(PIFO)                                                  | Homo sapiens |
| 4386 | 11756780_ | turquoise | membrane spanning 4-domains A7(MS4A7)                                          | Homo sapiens |
| 4387 | 11756786_ | turquoise | solute carrier family 38 member 9(SLC38A9)                                     | Homo sapiens |
| 4388 | 11756787_ | turquoise | hyaluronan and proteoglycan link protein 3(HAPLN3)                             | Homo sapiens |
| 4389 | 11756792_ | turquoise | microRNA 6837(MIR6837)                                                         | Homo sapiens |
| 4390 | 11756793_ | turquoise | vanin 2(VNN2)                                                                  | Homo sapiens |
| 4391 | 11756806_ | turquoise | interferon stimulated exonuclease gene 20(ISG20)                               | Homo sapiens |
| 4392 | 11756807_ | turquoise | receptor interacting serine/threonine kinase 1(RIPK1)                          | Homo sapiens |
| 4393 | 11756809_ | turquoise | EF-hand domain containing 2(EFHC2)                                             | Homo sapiens |
| 4394 | 11756818_ | turquoise | PAT1 homolog 2(PATL2)                                                          | Homo sapiens |
| 4395 | 11756822_ | turquoise | lymphatic vessel endothelial hyaluronan receptor 1(LYVE1)                      | Homo sapiens |
| 4396 | 11756827_ | turquoise | reticulon 1(RTN1)                                                              | Homo sapiens |
| 4397 | 11756839_ | turquoise | zinc finger CCCH-type containing, antiviral 1(ZC3HAV1)                         | Homo sapiens |
| 4398 | 11756847_ | turquoise | C-X3-C motif chemokine receptor 1(CX3CR1)                                      | Homo sapiens |

|      |                    |                                                                                      |              |
|------|--------------------|--------------------------------------------------------------------------------------|--------------|
| 4399 | 11756854_grey      | EH domain binding protein 1(EHBP1)                                                   | Homo sapiens |
| 4400 | 11756867_turquoise | tumor necrosis factor superfamily member 13b(TNFSF13B)                               | Homo sapiens |
| 4401 | 11756869_turquoise | PDZ domain containing 2(PDZD2)                                                       | Homo sapiens |
| 4402 | 11756871_turquoise | sorting nexin 10(SNX10)                                                              | Homo sapiens |
| 4403 | 11756883_turquoise | proline rich coiled-coil 2C(PRRC2C)                                                  | Homo sapiens |
| 4404 | 11756892_turquoise | C2 calcium dependent domain containing 2(C2CD2)                                      | Homo sapiens |
| 4405 | 11756913_turquoise | nucleotide binding oligomerization domain containing 1(NOD1)                         | Homo sapiens |
| 4406 | 11756924_turquoise | ATPase H+ transporting V1 subunit A(ATP6V1A)                                         | Homo sapiens |
| 4407 | 11756946_turquoise | TBC1 domain family member 10C(TBC1D10C)                                              | Homo sapiens |
| 4408 | 11756952_turquoise | transketolase(TKT)                                                                   | Homo sapiens |
| 4409 | 11756959_turquoise | protein kinase D2(PRKD2)                                                             | Homo sapiens |
| 4410 | 11756976_turquoise | LON peptidase N-terminal domain and ring finger 2(LONRF2)                            | Homo sapiens |
| 4411 | 11756977_turquoise | phytanoyl-CoA dioxygenase domain containing 1(PHYHD1)                                | Homo sapiens |
| 4412 | 11756979_turquoise | tubulin alpha 1b(TUBA1B)                                                             | Homo sapiens |
| 4413 | 11756984_turquoise | G protein subunit beta 2(GNB2)                                                       | Homo sapiens |
| 4414 | 11756994_turquoise | G protein subunit beta 2(GNB2)                                                       | Homo sapiens |
| 4415 | 11756999_turquoise | cytochrome b561 family member D2(CYB561D2)                                           | Homo sapiens |
| 4416 | 11757011_blue      | SPRY domain containing 7(SPRYD7)                                                     | Homo sapiens |
| 4417 | 11757022_turquoise | tissue factor pathway inhibitor 2(TFPI2)                                             | Homo sapiens |
| 4418 | 11757030_blue      | enoyl-CoA hydratase 1(ECH1)                                                          | Homo sapiens |
| 4419 | 11757035_turquoise | atypical chemokine receptor 1 (Duffy blood group)(ACKR1)                             | Homo sapiens |
| 4420 | 11757037_turquoise | microRNA 4738(MIR4738)                                                               | Homo sapiens |
| 4421 | 11757038_turquoise | microRNA 4738(MIR4738)                                                               | Homo sapiens |
| 4422 | 11757049_turquoise | CTD phosphatase subunit 1(CTDP1)                                                     | Homo sapiens |
| 4423 | 11757050_turquoise | transgelin 2(TAGLN2)                                                                 | Homo sapiens |
| 4424 | 11757056_turquoise | microRNA 1244-1(MIR1244-1)                                                           | Homo sapiens |
| 4425 | 11757059_turquoise | RPL36A-HNRNPH2 readthrough(RPL36A-HNRNPH2)                                           | Homo sapiens |
| 4426 | 11757073_brown     | THAP domain containing 4(THAP4)                                                      | Homo sapiens |
| 4427 | 11757083_brown     | coiled-coil-helix-coiled-coil-helix domain containing 3(CHCHD3)                      | Homo sapiens |
| 4428 | 11757085_turquoise | N-acylsphingosine amidohydrolase 2(ASAH2)                                            | Homo sapiens |
| 4429 | 11757141_turquoise | microRNA 1304(MIR1304)                                                               | Homo sapiens |
| 4430 | 11757156_turquoise | small nucleolar RNA, H/ACA box 44(SNORA44)                                           | Homo sapiens |
| 4431 | 11757164_turquoise | microRNA 1304(MIR1304)                                                               | Homo sapiens |
| 4432 | 11757180_turquoise | casein kinase 1 gamma 2(CSNK1G2)                                                     | Homo sapiens |
| 4433 | 11757186_turquoise | hexokinase 3(HK3)                                                                    | Homo sapiens |
| 4434 | 11757190_turquoise | lipopolysaccharide induced TNF factor(LITAF)                                         | Homo sapiens |
| 4435 | 11757194_turquoise | leishmanolysin like peptidase(LMLN)                                                  | Homo sapiens |
| 4436 | 11757213_turquoise | uncharacterized FLJ34503(FLJ34503)                                                   | Homo sapiens |
| 4437 | 11757259_turquoise | small Cajal body-specific RNA 9-like(SCARNA9L)                                       | Homo sapiens |
| 4438 | 11757265_brown     | eukaryotic translation initiation factor 3 subunit K(EIF3K)                          | Homo sapiens |
| 4439 | 11757267_brown     | sirtuin 2(SIRT2)                                                                     | Homo sapiens |
| 4440 | 11757269_turquoise | ferritin light chain(FTL)                                                            | Homo sapiens |
| 4441 | 11757271_turquoise | sorting nexin 6(SNX6)                                                                | Homo sapiens |
| 4442 | 11757274_turquoise | arginine and glutamate rich 1(ARGLU1)                                                | Homo sapiens |
| 4443 | 11757275_turquoise | arginine and glutamate rich 1(ARGLU1)                                                | Homo sapiens |
| 4444 | 11757279_brown     | translocase of inner mitochondrial membrane domain containing 1(TIMMDC1)             | Homo sapiens |
| 4445 | 11757281_brown     | ATP synthase, H+ transporting, mitochondrial Fo complex subunit C3 (subunit 9)(ATP5G | Homo sapiens |
| 4446 | 11757282_brown     | ATP synthase, H+ transporting, mitochondrial Fo complex subunit C3 (subunit 9)(ATP5G | Homo sapiens |
| 4447 | 11757284_turquoise | myeloid derived growth factor(MYDGF)                                                 | Homo sapiens |
| 4448 | 11757289_turquoise | clathrin light chain A(CLTA)                                                         | Homo sapiens |

|      |                    |                                                                  |              |
|------|--------------------|------------------------------------------------------------------|--------------|
| 4449 | 11757291_turquoise | iron-sulfur cluster assembly enzyme(ISCU)                        | Homo sapiens |
| 4450 | 11757300_turquoise | ELOVL fatty acid elongase 5(ELOVL5)                              | Homo sapiens |
| 4451 | 11757321_turquoise | TAP binding protein(TAPBP)                                       | Homo sapiens |
| 4452 | 11757326_turquoise | ferritin light chain(FTL)                                        | Homo sapiens |
| 4453 | 11757327_turquoise | ferritin light chain(FTL)                                        | Homo sapiens |
| 4454 | 11757330_brown     | small nuclear ribonucleoprotein polypeptide C(SNRPC)             | Homo sapiens |
| 4455 | 11757332_turquoise | microRNA 3064(MIR3064)                                           | Homo sapiens |
| 4456 | 11757334_brown     | ubiquinol-cytochrome c reductase, complex III subunit XI(UQCR11) | Homo sapiens |
| 4457 | 11757335_turquoise | mitochondrial translational initiation factor 3(MTIF3)           | Homo sapiens |
| 4458 | 11757337_turquoise | microRNA 6734(MIR6734)                                           | Homo sapiens |
| 4459 | 11757338_turquoise | glyoxylate and hydroxypyruvate reductase(GRHPR)                  | Homo sapiens |
| 4460 | 11757342_turquoise | dCMP deaminase(DCTD)                                             | Homo sapiens |
| 4461 | 11757344_turquoise | small nuclear ribonucleoprotein polypeptides B and B1(SNRPB)     | Homo sapiens |
| 4462 | 11757346_turquoise | ferritin light chain(FTL)                                        | Homo sapiens |
| 4463 | 11757351_turquoise | transporter 1, ATP binding cassette subfamily B member(TAP1)     | Homo sapiens |
| 4464 | 11757367_turquoise | heat shock protein family A (Hsp70) member 6(HSPA6)              | Homo sapiens |
| 4465 | 11757368_turquoise | annexin A4(ANXA4)                                                | Homo sapiens |
| 4466 | 11757369_turquoise | mannosidase alpha class 2B member 1(MAN2B1)                      | Homo sapiens |
| 4467 | 11757373_turquoise | apolipoprotein C1(APOC1)                                         | Homo sapiens |
| 4468 | 11757379_turquoise | tyrosine kinase 2(TYK2)                                          | Homo sapiens |
| 4469 | 11757383_turquoise | cathepsin H(CTSH)                                                | Homo sapiens |
| 4470 | 11757404_turquoise | inhibitor of DNA binding 3, HLH protein(ID3)                     | Homo sapiens |
| 4471 | 11757405_brown     | methionine sulfoxide reductase B2(MSRB2)                         | Homo sapiens |
| 4472 | 11757409_turquoise | thymosin beta 10(TMSB10)                                         | Homo sapiens |
| 4473 | 11757413_brown     | NADH:ubiquinone oxidoreductase core subunit S3(NDUFS3)           | Homo sapiens |
| 4474 | 11757415_turquoise | solute carrier family 5 member 3(SLC5A3)                         | Homo sapiens |
| 4475 | 11757420_turquoise | ZFP36 ring finger protein like 2(ZFP36L2)                        | Homo sapiens |
| 4476 | 11757425_turquoise | vascular cell adhesion molecule 1(VCAM1)                         | Homo sapiens |
| 4477 | 11757429_brown     | cytochrome c1(CYC1)                                              | Homo sapiens |
| 4478 | 11757435_turquoise | bridging integrator 1(BIN1)                                      | Homo sapiens |
| 4479 | 11757436_turquoise | interferon induced transmembrane protein 2(IFITM2)               | Homo sapiens |
| 4480 | 11757438_turquoise | destrin, actin depolymerizing factor(DSTN)                       | Homo sapiens |
| 4481 | 11757439_turquoise | GDP dissociation inhibitor 2(GDI2)                               | Homo sapiens |
| 4482 | 11757443_blue      | translocase of inner mitochondrial membrane 21(TIMM21)           | Homo sapiens |
| 4483 | 11757446_brown     | MINOS1-NBL1 readthrough(MINOS1-NBL1)                             | Homo sapiens |
| 4484 | 11757454_turquoise | cAMP responsive element binding protein like 2(CREBL2)           | Homo sapiens |
| 4485 | 11757455_turquoise | glutathione peroxidase 1(GPX1)                                   | Homo sapiens |
| 4486 | 11757459_turquoise | WAS/WASL interacting protein family member 1(WIPF1)              | Homo sapiens |
| 4487 | 11757464_turquoise | plexin B2(PLXNB2)                                                | Homo sapiens |
| 4488 | 11757465_blue      | glioblastoma amplified sequence(GBAS)                            | Homo sapiens |
| 4489 | 11757469_turquoise | tripeptidyl peptidase 1(TPP1)                                    | Homo sapiens |
| 4490 | 11757470_turquoise | transcription factor 25(TCF25)                                   | Homo sapiens |
| 4491 | 11757474_turquoise | chloride intracellular channel 1(CLIC1)                          | Homo sapiens |
| 4492 | 11757477_turquoise | LIM and SH3 protein 1(LASP1)                                     | Homo sapiens |
| 4493 | 11757480_turquoise | interferon alpha inducible protein 27(IFI27)                     | Homo sapiens |
| 4494 | 11757483_turquoise | von Willebrand factor A domain containing 1(VWA1)                | Homo sapiens |
| 4495 | 11757485_brown     | family with sequence similarity 129 member B(FAM129B)            | Homo sapiens |
| 4496 | 11757511_turquoise | major histocompatibility complex, class II, DP alpha 1(HLA-DPA1) | Homo sapiens |
| 4497 | 11757513_turquoise | NFKB inhibitor zeta(NFKBIZ)                                      | Homo sapiens |
| 4498 | 11757519_turquoise | capping actin protein, gelsolin like(CAPG)                       | Homo sapiens |

|      |                     |                                                                                       |              |
|------|---------------------|---------------------------------------------------------------------------------------|--------------|
| 4499 | 11757524_ blue      | cytochrome c1(CYC1)                                                                   | Homo sapiens |
| 4500 | 11757529_ turquoise | lysosomal associated membrane protein 1(LAMP1)                                        | Homo sapiens |
| 4501 | 11757532_ turquoise | RNA binding motif protein 47(RBM47)                                                   | Homo sapiens |
| 4502 | 11757533_ turquoise | phospholipid scramblase 1(PLSCR1)                                                     | Homo sapiens |
| 4503 | 11757538_ blue      | glutamic-oxaloacetic transaminase 1(GOT1)                                             | Homo sapiens |
| 4504 | 11757539_ turquoise | stromal interaction molecule 2(STIM2)                                                 | Homo sapiens |
| 4505 | 11757544_ turquoise | intercellular adhesion molecule 2(ICAM2)                                              | Homo sapiens |
| 4506 | 11757545_ turquoise | platelet and endothelial cell adhesion molecule 1(PECAM1)                             | Homo sapiens |
| 4507 | 11757546_ turquoise | MICAL like 2(MICALL2)                                                                 | Homo sapiens |
| 4508 | 11757552_ turquoise | actin related protein 2/3 complex subunit 3(ARPC3)                                    | Homo sapiens |
| 4509 | 11757554_ turquoise | EGF like domain multiple 8(EGFL8)                                                     | Homo sapiens |
| 4510 | 11757556_ turquoise | bleomycin hydrolase(BLMH)                                                             | Homo sapiens |
| 4511 | 11757563_ turquoise | protein phosphatase 1 regulatory subunit 35(PPP1R35)                                  | Homo sapiens |
| 4512 | 11757566_ turquoise | nucleolar protein 8(NOL8)                                                             | Homo sapiens |
| 4513 | 11757567_ brown     | NADH:ubiquinone oxidoreductase subunit B5(NDUFB5)                                     | Homo sapiens |
| 4514 | 11757574_ turquoise | transmembrane protein 123(TMEM123)                                                    | Homo sapiens |
| 4515 | 11757588_ turquoise | ALG5, dolichyl-phosphate beta-glucosyltransferase(ALG5)                               | Homo sapiens |
| 4516 | 11757589_ brown     | NADH:ubiquinone oxidoreductase subunit A12(NDUFA12)                                   | Homo sapiens |
| 4517 | 11757590_ turquoise | ISY1-RAB43 readthrough(ISY1-RAB43)                                                    | Homo sapiens |
| 4518 | 11757591_ turquoise | PAN3 poly(A) specific ribonuclease subunit(PAN3)                                      | Homo sapiens |
| 4519 | 11757601_ brown     | COP9 signalosome subunit 3(COPS3)                                                     | Homo sapiens |
| 4520 | 11757602_ turquoise | endoplasmic reticulum protein 29(ERP29)                                               | Homo sapiens |
| 4521 | 11757604_ turquoise | SAMM50 sorting and assembly machinery component(SAMM50)                               | Homo sapiens |
| 4522 | 11757613_ brown     | eukaryotic translation initiation factor 3 subunit K(EIF3K)                           | Homo sapiens |
| 4523 | 11757624_ turquoise | poly(ADP-ribose) polymerase family member 12(PARP12)                                  | Homo sapiens |
| 4524 | 11757625_ turquoise | CD200 molecule(CD200)                                                                 | Homo sapiens |
| 4525 | 11757630_ turquoise | HERPUD family member 2(HERPUD2)                                                       | Homo sapiens |
| 4526 | 11757632_ turquoise | LIM domain kinase 2(LIMK2)                                                            | Homo sapiens |
| 4527 | 11757635_ turquoise | TYRO protein tyrosine kinase binding protein(TYROBP)                                  | Homo sapiens |
| 4528 | 11757638_ turquoise | CD93 molecule(CD93)                                                                   | Homo sapiens |
| 4529 | 11757649_ brown     | CORO7-PAM16 readthrough(CORO7-PAM16)                                                  | Homo sapiens |
| 4530 | 11757652_ turquoise | prolyl 3-hydroxylase 1(P3H1)                                                          | Homo sapiens |
| 4531 | 11757653_ turquoise | CDK5 regulatory subunit associated protein 3(CDK5RAP3)                                | Homo sapiens |
| 4532 | 11757654_ turquoise | uncoupling protein 2(UCP2)                                                            | Homo sapiens |
| 4533 | 11757661_ turquoise | small nuclear ribonucleoprotein polypeptides B and B1(SNRPB)                          | Homo sapiens |
| 4534 | 11757669_ turquoise | peptidylprolyl isomerase like 1(PPIL1)                                                | Homo sapiens |
| 4535 | 11757670_ brown     | ubiquinol-cytochrome c reductase, complex III subunit X(UQCR10)                       | Homo sapiens |
| 4536 | 11757672_ brown     | mitochondrial ribosomal protein S17(MRPS17)                                           | Homo sapiens |
| 4537 | 11757692_ turquoise | APC, WNT signaling pathway regulator(APC)                                             | Homo sapiens |
| 4538 | 11757713_ turquoise | ataxin 2 like(ATXN2L)                                                                 | Homo sapiens |
| 4539 | 11757722_ turquoise | septin 8(SEPT8)                                                                       | Homo sapiens |
| 4540 | 11757727_ brown     | ATP synthase, H <sup>+</sup> transporting, mitochondrial F1 complex, O subunit(ATP5O) | Homo sapiens |
| 4541 | 11757728_ turquoise | ferritin light chain(FTL)                                                             | Homo sapiens |
| 4542 | 11757731_ turquoise | RAB31, member RAS oncogene family(RAB31)                                              | Homo sapiens |
| 4543 | 11757732_ turquoise | G protein subunit alpha i2(GNAI2)                                                     | Homo sapiens |
| 4544 | 11757737_ turquoise | recombination signal binding protein for immunoglobulin kappa J region(RBPJ)          | Homo sapiens |
| 4545 | 11757756_ turquoise | additional sex combs like 2, transcriptional regulator(ASXL2)                         | Homo sapiens |
| 4546 | 11757765_ turquoise | sarcoglycan delta(SGCD)                                                               | Homo sapiens |
| 4547 | 11757787_ turquoise | ferritin light chain(FTL)                                                             | Homo sapiens |
| 4548 | 11757798_ turquoise | MAF bZIP transcription factor B(MAFB)                                                 | Homo sapiens |

|      |                    |                                                                                  |              |
|------|--------------------|----------------------------------------------------------------------------------|--------------|
| 4549 | 11757801_turquoise | major histocompatibility complex, class II, DP beta 1(HLA-DPB1)                  | Homo sapiens |
| 4550 | 11757806_turquoise | peroxiredoxin 6(PRDX6)                                                           | Homo sapiens |
| 4551 | 11757807_turquoise | actin beta(ACTB)                                                                 | Homo sapiens |
| 4552 | 11757816_turquoise | myristoylated alanine rich protein kinase C substrate(MARCKS)                    | Homo sapiens |
| 4553 | 11757817_turquoise | brain abundant membrane attached signal protein 1(BASP1)                         | Homo sapiens |
| 4554 | 11757818_turquoise | cofilin 1(CFL1)                                                                  | Homo sapiens |
| 4555 | 11757825_brown     | C7orf55-LUC7L2 readthrough(C7orf55-LUC7L2)                                       | Homo sapiens |
| 4556 | 11757831_turquoise | synaptosome associated protein 23(SNAP23)                                        | Homo sapiens |
| 4557 | 11757833_turquoise | RAB31, member RAS oncogene family(RAB31)                                         | Homo sapiens |
| 4558 | 11757839_turquoise | NECAP endocytosis associated 2(NECAP2)                                           | Homo sapiens |
| 4559 | 11757847_brown     | ubiquinol-cytochrome c reductase, Rieske iron-sulfur polypeptide 1(UQCRFS1)      | Homo sapiens |
| 4560 | 11757863_brown     | transmembrane protein 261(TMEM261)                                               | Homo sapiens |
| 4561 | 11757867_turquoise | basic leucine zipper and W2 domains 1(BZW1)                                      | Homo sapiens |
| 4562 | 11757872_turquoise | phospholipid scramblase 1(PLSCR1)                                                | Homo sapiens |
| 4563 | 11757873_blue      | ATP synthase, H+ transporting, mitochondrial F1 complex, beta polypeptide(ATP5B) | Homo sapiens |
| 4564 | 11757875_turquoise | Lck interacting transmembrane adaptor 1(LIME1)                                   | Homo sapiens |
| 4565 | 11757879_turquoise | microRNA 6837(MIR6837)                                                           | Homo sapiens |
| 4566 | 11757883_turquoise | ring finger protein 4(RNF4)                                                      | Homo sapiens |
| 4567 | 11757887_turquoise | tyrosine 3-monooxygenase/tryptophan 5-monooxygenase activation protein beta(YWH  | Homo sapiens |
| 4568 | 11757890_turquoise | mitochondrial transcription termination factor 2(MTERF2)                         | Homo sapiens |
| 4569 | 11757894_turquoise | NFKB inhibitor alpha(NFKBIA)                                                     | Homo sapiens |
| 4570 | 11757896_turquoise | arginine and serine rich protein 1(RSRP1)                                        | Homo sapiens |
| 4571 | 11757904_turquoise | microtubule associated serine/threonine kinase 3(MAST3)                          | Homo sapiens |
| 4572 | 11757908_turquoise | ral guanine nucleotide dissociation stimulator(RALGDS)                           | Homo sapiens |
| 4573 | 11757917_turquoise | CCR4-NOT transcription complex subunit 6 like(CNOT6L)                            | Homo sapiens |
| 4574 | 11757920_turquoise | zyg-11 family member B, cell cycle regulator(ZYG11B)                             | Homo sapiens |
| 4575 | 11757931_turquoise | KIAA0930(KIAA0930)                                                               | Homo sapiens |
| 4576 | 11757934_turquoise | KIAA1551(KIAA1551)                                                               | Homo sapiens |
| 4577 | 11757935_turquoise | KIAA1551(KIAA1551)                                                               | Homo sapiens |
| 4578 | 11757936_brown     | glycine cleavage system protein H pseudogene 3(GCSHP3)                           | Homo sapiens |
| 4579 | 11757938_turquoise | N-myc and STAT interactor(NMI)                                                   | Homo sapiens |
| 4580 | 11757940_turquoise | placental growth factor(PGF)                                                     | Homo sapiens |
| 4581 | 11757942_turquoise | utrophin(UTRN)                                                                   | Homo sapiens |
| 4582 | 11757950_turquoise | chondroitin sulfate synthase 1(CHSY1)                                            | Homo sapiens |
| 4583 | 11757953_turquoise | tetratricopeptide repeat domain 39C(TTC39C)                                      | Homo sapiens |
| 4584 | 11757957_turquoise | SRY-box 6(SOX6)                                                                  | Homo sapiens |
| 4585 | 11757960_turquoise | ArfGAP with RhoGAP domain, ankyrin repeat and PH domain 2(ARAP2)                 | Homo sapiens |
| 4586 | 11757966_turquoise | zinc finger protein 75D(ZNF75D)                                                  | Homo sapiens |
| 4587 | 11757983_turquoise | translocation associated membrane protein 1(TRAM1)                               | Homo sapiens |
| 4588 | 11757986_turquoise | MIS12, kinetochore complex component(MIS12)                                      | Homo sapiens |
| 4589 | 11757989_turquoise | ankyrin repeat domain 46(ANKRD46)                                                | Homo sapiens |
| 4590 | 11758007_turquoise | YY1 associated factor 2(YAF2)                                                    | Homo sapiens |
| 4591 | 11758008_turquoise | patatin like phospholipase domain containing 4(PNPLA4)                           | Homo sapiens |
| 4592 | 11758009_turquoise | uncharacterized LOC100130460(CAND1.11)                                           | Homo sapiens |
| 4593 | 11758011_turquoise | eukaryotic translation elongation factor 1 alpha 1(EEF1A1)                       | Homo sapiens |
| 4594 | 11758014_turquoise | transforming growth factor beta receptor 1(TGFBR1)                               | Homo sapiens |
| 4595 | 11758017_turquoise | peptidyl-prolyl cis-trans isomerase A pseudogene(LOC101060363)                   | Homo sapiens |
| 4596 | 11758025_turquoise | inositol polyphosphate-5-phosphatase F(INPP5F)                                   | Homo sapiens |
| 4597 | 11758037_turquoise | myotubularin related protein 12(MTMR12)                                          | Homo sapiens |
| 4598 | 11758042_turquoise | actin beta(ACTB)                                                                 | Homo sapiens |

|      |                    |                                                                         |              |
|------|--------------------|-------------------------------------------------------------------------|--------------|
| 4599 | 11758043_turquoise | immediate early response 2(IER2)                                        | Homo sapiens |
| 4600 | 11758047_turquoise | major facilitator superfamily domain containing 14A(MFSD14A)            | Homo sapiens |
| 4601 | 11758056_blue      | threonyl-tRNA synthetase like 2(TARSL2)                                 | Homo sapiens |
| 4602 | 11758059_turquoise | ankyrin repeat domain 49(ANKRD49)                                       | Homo sapiens |
| 4603 | 11758067_turquoise | peptidyl-prolyl cis-trans isomerase A pseudogene(LOC101060363)          | Homo sapiens |
| 4604 | 11758089_turquoise | hyaluronan mediated motility receptor(HMMR)                             | Homo sapiens |
| 4605 | 11758090_turquoise | interleukin 16(IL16)                                                    | Homo sapiens |
| 4606 | 11758092_turquoise | ephrin A5(EFNA5)                                                        | Homo sapiens |
| 4607 | 11758094_turquoise | nuclear factor of activated T-cells 2 interacting protein(NFATC2IP)     | Homo sapiens |
| 4608 | 11758101_blue      | eukaryotic translation initiation factor 4E binding protein 2(EIF4EBP2) | Homo sapiens |
| 4609 | 11758113_turquoise | actin related protein 2/3 complex subunit 4(ARPC4)                      | Homo sapiens |
| 4610 | 11758114_turquoise | src kinase associated phosphoprotein 2(SKAP2)                           | Homo sapiens |
| 4611 | 11758126_turquoise | ELL associated factor 1(EAF1)                                           | Homo sapiens |
| 4612 | 11758132_blue      | trimethyllysine hydroxylase, epsilon(TMLHE)                             | Homo sapiens |
| 4613 | 11758135_brown     | chromosome 14 open reading frame 2(C14orf2)                             | Homo sapiens |
| 4614 | 11758144_turquoise | heterogeneous nuclear ribonucleoprotein C (C1/C2)(HNRNPC)               | Homo sapiens |
| 4615 | 11758148_turquoise | beta-2-microglobulin(B2M)                                               | Homo sapiens |
| 4616 | 11758149_turquoise | Rac GTPase activating protein 1(RACGAP1)                                | Homo sapiens |
| 4617 | 11758158_turquoise | forkhead box P1(FOXP1)                                                  | Homo sapiens |
| 4618 | 11758162_turquoise | ferredoxin 1(FDX1)                                                      | Homo sapiens |
| 4619 | 11758176_turquoise | ATPase phospholipid transporting 10D (putative)(ATP10D)                 | Homo sapiens |
| 4620 | 11758178_turquoise | coronin 1B(CORO1B)                                                      | Homo sapiens |
| 4621 | 11758182_turquoise | ferritin light chain(FTL)                                               | Homo sapiens |
| 4622 | 11758190_blue      | succinate dehydrogenase complex subunit D(SDHD)                         | Homo sapiens |
| 4623 | 11758191_turquoise | mex-3 RNA binding family member C(MEX3C)                                | Homo sapiens |
| 4624 | 11758192_turquoise | beta-2-microglobulin(B2M)                                               | Homo sapiens |
| 4625 | 11758193_turquoise | beta-2-microglobulin(B2M)                                               | Homo sapiens |
| 4626 | 11758208_turquoise | Kruppel like factor 2(KLF2)                                             | Homo sapiens |
| 4627 | 11758210_turquoise | tRNA methyltransferase 10C, mitochondrial RNase P subunit(TRMT10C)      | Homo sapiens |
| 4628 | 11758215_turquoise | transducin like enhancer of split 3(TLE3)                               | Homo sapiens |
| 4629 | 11758218_blue      | motile sperm domain containing 1(MOSPD1)                                | Homo sapiens |
| 4630 | 11758219_turquoise | ribonucleotide reductase regulatory subunit M2(RRM2)                    | Homo sapiens |
| 4631 | 11758222_turquoise | solute carrier family 20 member 1(SLC20A1)                              | Homo sapiens |
| 4632 | 11758225_turquoise | IQ motif containing GTPase activating protein 2(IQGAP2)                 | Homo sapiens |
| 4633 | 11758226_turquoise | ubiquitin conjugating enzyme E2 J1(UBE2J1)                              | Homo sapiens |
| 4634 | 11758231_turquoise | major histocompatibility complex, class II, DP alpha 1(HLA-DPA1)        | Homo sapiens |
| 4635 | 11758238_turquoise | ATP binding cassette subfamily C member 4(ABCC4)                        | Homo sapiens |
| 4636 | 11758244_blue      | A-kinase anchoring protein 6(AKAP6)                                     | Homo sapiens |
| 4637 | 11758248_blue      | succinate dehydrogenase complex subunit D(SDHD)                         | Homo sapiens |
| 4638 | 11758259_turquoise | solute carrier organic anion transporter family member 2B1(SLCO2B1)     | Homo sapiens |
| 4639 | 11758260_turquoise | beta-2-microglobulin(B2M)                                               | Homo sapiens |
| 4640 | 11758261_turquoise | centrosomal protein 55(CEP55)                                           | Homo sapiens |
| 4641 | 11758263_turquoise | cytochrome b-245 beta chain(CYBB)                                       | Homo sapiens |
| 4642 | 11758269_turquoise | methionine adenosyltransferase 2B(MAT2B)                                | Homo sapiens |
| 4643 | 11758273_turquoise | ADP ribosylation factor 6(ARF6)                                         | Homo sapiens |
| 4644 | 11758277_turquoise | neuroblastoma breakpoint family member 10(NBPF10)                       | Homo sapiens |
| 4645 | 11758279_turquoise | coronin 1C(CORO1C)                                                      | Homo sapiens |
| 4646 | 11758282_turquoise | tubulin alpha 1c(TUBA1C)                                                | Homo sapiens |
| 4647 | 11758297_turquoise | SHC adaptor protein 1(SHC1)                                             | Homo sapiens |
| 4648 | 11758299_turquoise | beta-2-microglobulin(B2M)                                               | Homo sapiens |

|      |                    |                                                                                   |              |
|------|--------------------|-----------------------------------------------------------------------------------|--------------|
| 4649 | 11758300_turquoise | beta-2-microglobulin(B2M)                                                         | Homo sapiens |
| 4650 | 11758311_blue      | succinate dehydrogenase complex subunit D(SDHD)                                   | Homo sapiens |
| 4651 | 11758314_brown     | NADH:ubiquinone oxidoreductase complex assembly factor 2(NDUFAF2)                 | Homo sapiens |
| 4652 | 11758327_turquoise | bromodomain adjacent to zinc finger domain 1A(BAZ1A)                              | Homo sapiens |
| 4653 | 11758330_blue      | succinate dehydrogenase complex subunit D(SDHD)                                   | Homo sapiens |
| 4654 | 11758331_turquoise | uncharacterized LOC101929823(LOC101929823)                                        | Homo sapiens |
| 4655 | 11758335_blue      | ferredoxin 1(FDX1)                                                                | Homo sapiens |
| 4656 | 11758337_turquoise | adenosine deaminase(ADA)                                                          | Homo sapiens |
| 4657 | 11758340_turquoise | major histocompatibility complex, class II, DQ alpha 1(HLA-DQA1)                  | Homo sapiens |
| 4658 | 11758343_brown     | up-regulated during skeletal muscle growth 5 homolog (mouse)(USMG5)               | Homo sapiens |
| 4659 | 11758365_turquoise | tubulin tyrosine ligase like 8(TTLL8)                                             | Homo sapiens |
| 4660 | 11758369_turquoise | major histocompatibility complex, class II, DP beta 1(HLA-DPB1)                   | Homo sapiens |
| 4661 | 11758377_turquoise | toll like receptor 1(TLR1)                                                        | Homo sapiens |
| 4662 | 11758385_turquoise | hes related family bHLH transcription factor with YRPW motif 2(HEY2)              | Homo sapiens |
| 4663 | 11758401_turquoise | zinc finger protein 148(ZNF148)                                                   | Homo sapiens |
| 4664 | 11758402_blue      | family with sequence similarity 179 member B(FAM179B)                             | Homo sapiens |
| 4665 | 11758409_turquoise | microRNA 6805(MIR6805)                                                            | Homo sapiens |
| 4666 | 11758417_turquoise | major histocompatibility complex, class II, DP alpha 1(HLA-DPA1)                  | Homo sapiens |
| 4667 | 11758418_turquoise | family with sequence similarity 219 member B(FAM219B)                             | Homo sapiens |
| 4668 | 11758419_turquoise | transmembrane protein 106A(TMEM106A)                                              | Homo sapiens |
| 4669 | 11758447_turquoise | nucleoporin 50(NUP50)                                                             | Homo sapiens |
| 4670 | 11758448_turquoise | TMED7-TICAM2 readthrough(TMED7-TICAM2)                                            | Homo sapiens |
| 4671 | 11758478_turquoise | cell division cycle associated 7(CDCA7)                                           | Homo sapiens |
| 4672 | 11758486_turquoise | beta-site APP-cleaving enzyme 2(BACE2)                                            | Homo sapiens |
| 4673 | 11758500_turquoise | transmembrane protein 140(TMEM140)                                                | Homo sapiens |
| 4674 | 11758501_turquoise | nicotinamide nucleotide adenyltransferase 1(NMNAT1)                               | Homo sapiens |
| 4675 | 11758527_turquoise | inositol 1,4,5-trisphosphate receptor type 2(ITPR2)                               | Homo sapiens |
| 4676 | 11758537_turquoise | tripartite motif containing 25(TRIM25)                                            | Homo sapiens |
| 4677 | 11758539_turquoise | dedicator of cytokinesis 10(DOCK10)                                               | Homo sapiens |
| 4678 | 11758542_turquoise | zinc finger CCCH-type, RNA binding motif and serine/arginine rich 2(ZRSR2)        | Homo sapiens |
| 4679 | 11758547_turquoise | echinoderm microtubule associated protein like 1(EML1)                            | Homo sapiens |
| 4680 | 11758550_turquoise | transmembrane protein 268(TMEM268)                                                | Homo sapiens |
| 4681 | 11758554_turquoise | ring finger and WD repeat domain 2(RFWD2)                                         | Homo sapiens |
| 4682 | 11758555_turquoise | G protein-coupled receptor 183(GPR183)                                            | Homo sapiens |
| 4683 | 11758557_turquoise | ZFP36 ring finger protein like 1(ZFP36L1)                                         | Homo sapiens |
| 4684 | 11758558_turquoise | ATPase sarcoplasmic/endoplasmic reticulum Ca <sup>2+</sup> transporting 2(ATP2A2) | Homo sapiens |
| 4685 | 11758566_brown     | BCS1 homolog, ubiquinol-cytochrome c reductase complex chaperone(BCS1L)           | Homo sapiens |
| 4686 | 11758595_turquoise | neurobeachin(NBEA)                                                                | Homo sapiens |
| 4687 | 11758607_turquoise | von Willebrand factor A domain containing 8(VWA8)                                 | Homo sapiens |
| 4688 | 11758608_turquoise | colony stimulating factor 2 receptor beta common subunit(CSF2RB)                  | Homo sapiens |
| 4689 | 11758620_turquoise | methylmalonic aciduria (cobalamin deficiency) cb1B type(MMAB)                     | Homo sapiens |
| 4690 | 11758630_turquoise | fibrinogen like 2(FGL2)                                                           | Homo sapiens |
| 4691 | 11758645_turquoise | eukaryotic translation initiation factor 4E binding protein 2(EIF4EBP2)           | Homo sapiens |
| 4692 | 11758653_turquoise | adhesion G protein-coupled receptor L4(ADGRL4)                                    | Homo sapiens |
| 4693 | 11758663_turquoise | small nucleolar RNA host gene 4(SNHG4)                                            | Homo sapiens |
| 4694 | 11758667_turquoise | tyrosine 3-monooxygenase/tryptophan 5-monooxygenase activation protein zeta(YWH)  | Homo sapiens |
| 4695 | 11758671_turquoise | IKAROS family zinc finger 1(IKZF1)                                                | Homo sapiens |
| 4696 | 11758679_turquoise | microRNA 1292(MIR1292)                                                            | Homo sapiens |
| 4697 | 11758683_turquoise | jade family PHD finger 2(JADE2)                                                   | Homo sapiens |
| 4698 | 11758693_turquoise | microRNA 7703(MIR7703)                                                            | Homo sapiens |



|      |                    |                                                                                     |              |
|------|--------------------|-------------------------------------------------------------------------------------|--------------|
| 4699 | 11758709_turquoise | retinol dehydrogenase 11 (all-trans/9-cis/11-cis)(RDH11)                            | Homo sapiens |
| 4700 | 11758711_turquoise | tyrosine 3-monooxygenase/tryptophan 5-monooxygenase activation protein zeta(YWH)    | Homo sapiens |
| 4701 | 11758716_turquoise | NDUFA4, mitochondrial complex associated(NDUFA4)                                    | Homo sapiens |
| 4702 | 11758717_brown     | NDUFA4, mitochondrial complex associated(NDUFA4)                                    | Homo sapiens |
| 4703 | 11758727_brown     | ATP synthase, H+ transporting, mitochondrial F1 complex, gamma polypeptide 1(ATP5C) | Homo sapiens |
| 4704 | 11758750_turquoise | tyrosine 3-monooxygenase/tryptophan 5-monooxygenase activation protein zeta(YWH)    | Homo sapiens |
| 4705 | 11758753_turquoise | StAR related lipid transfer domain containing 3(STARD3)                             | Homo sapiens |
| 4706 | 11758754_turquoise | Fas associated factor 1(FAF1)                                                       | Homo sapiens |
| 4707 | 11758755_blue      | mitochondrial pyruvate carrier 2(MPC2)                                              | Homo sapiens |
| 4708 | 11758757_turquoise | alcohol dehydrogenase 5 (class III), chi polypeptide(ADH5)                          | Homo sapiens |
| 4709 | 11758771_turquoise | major histocompatibility complex, class II, DP beta 1(HLA-DPB1)                     | Homo sapiens |
| 4710 | 11758772_turquoise | major histocompatibility complex, class II, DP beta 1(HLA-DPB1)                     | Homo sapiens |
| 4711 | 11758793_turquoise | mitochondrial calcium uniporter dominant negative beta subunit(MCUB)                | Homo sapiens |
| 4712 | 11758795_brown     | mitochondrial ribosomal protein L45(MRPL45)                                         | Homo sapiens |
| 4713 | 11758821_turquoise | major histocompatibility complex, class II, DQ beta 1(HLA-DQB1)                     | Homo sapiens |
| 4714 | 11758831_turquoise | RNA polymerase II subunit C(POLR2C)                                                 | Homo sapiens |
| 4715 | 11758838_turquoise | serine palmitoyltransferase long chain base subunit 2(SPTLC2)                       | Homo sapiens |
| 4716 | 11758854_turquoise | atlastin GTPase 3(ATL3)                                                             | Homo sapiens |
| 4717 | 11758862_turquoise | poly(A) binding protein interacting protein 2B(PAIP2B)                              | Homo sapiens |
| 4718 | 11758868_turquoise | Rap guanine nucleotide exchange factor 6(RAPGEF6)                                   | Homo sapiens |
| 4719 | 11758873_turquoise | heparanase(HPSE)                                                                    | Homo sapiens |
| 4720 | 11758879_turquoise | major histocompatibility complex, class I, E(HLA-E)                                 | Homo sapiens |
| 4721 | 11758882_turquoise | CD3d molecule(CD3D)                                                                 | Homo sapiens |
| 4722 | 11758897_turquoise | apolipoprotein B mRNA editing enzyme catalytic subunit 3C(APOBEC3C)                 | Homo sapiens |
| 4723 | 11758898_turquoise | apolipoprotein B mRNA editing enzyme catalytic subunit 3C(APOBEC3C)                 | Homo sapiens |
| 4724 | 11758901_turquoise | receptor interacting serine/threonine kinase 2(RIPK2)                               | Homo sapiens |
| 4725 | 11758921_turquoise | mitochondrial ribosomal protein S17(MRPS17)                                         | Homo sapiens |
| 4726 | 11758922_turquoise | syntaxin binding protein 6(STXBP6)                                                  | Homo sapiens |
| 4727 | 11758933_turquoise | transmembrane 4 L six family member 18(TM4SF18)                                     | Homo sapiens |
| 4728 | 11758934_turquoise | RAB27A, member RAS oncogene family(RAB27A)                                          | Homo sapiens |
| 4729 | 11758940_turquoise | MOB kinase activator 1A(MOB1A)                                                      | Homo sapiens |
| 4730 | 11758941_turquoise | MOB kinase activator 1A(MOB1A)                                                      | Homo sapiens |
| 4731 | 11758942_turquoise | MOB kinase activator 1A(MOB1A)                                                      | Homo sapiens |
| 4732 | 11758947_turquoise | copine 4(CPNE4)                                                                     | Homo sapiens |
| 4733 | 11758984_turquoise | zinc finger RANBP2-type containing 1(ZRANB1)                                        | Homo sapiens |
| 4734 | 11758990_turquoise | SLC9A3 regulator 1(SLC9A3R1)                                                        | Homo sapiens |
| 4735 | 11758994_turquoise | fatty acyl-CoA reductase 2(FAR2)                                                    | Homo sapiens |
| 4736 | 11759022_turquoise | ELK3, ETS transcription factor(ELK3)                                                | Homo sapiens |
| 4737 | 11759049_turquoise | acyl-CoA synthetase short-chain family member 3(ACSS3)                              | Homo sapiens |
| 4738 | 11759087_turquoise | NHL repeat containing 2(NHLRC2)                                                     | Homo sapiens |
| 4739 | 11759088_turquoise | membrane associated ring-CH-type finger 1(MARCH1)                                   | Homo sapiens |
| 4740 | 11759093_turquoise | G protein subunit alpha q(GNAQ)                                                     | Homo sapiens |
| 4741 | 11759094_turquoise | G protein subunit alpha q(GNAQ)                                                     | Homo sapiens |
| 4742 | 11759095_turquoise | G protein subunit alpha q(GNAQ)                                                     | Homo sapiens |
| 4743 | 11759144_turquoise | zinc finger protein 710(ZNF710)                                                     | Homo sapiens |
| 4744 | 11759177_turquoise | mannosidase alpha class 1A member 1(MAN1A1)                                         | Homo sapiens |
| 4745 | 11759179_blue      | transmembrane protein 38B(TMEM38B)                                                  | Homo sapiens |
| 4746 | 11759184_turquoise | plexin C1(PLXNC1)                                                                   | Homo sapiens |
| 4747 | 11759187_turquoise | TNF alpha induced protein 8 like 1(TNFAIP8L1)                                       | Homo sapiens |
| 4748 | 11759288_blue      | thioredoxin related transmembrane protein 4(TM44)                                   | Homo sapiens |

|      |                    |                                                                     |              |
|------|--------------------|---------------------------------------------------------------------|--------------|
| 4749 | 11759292_turquoise | family with sequence similarity 63 member A(FAM63A)                 | Homo sapiens |
| 4750 | 11759294_turquoise | lysine methyltransferase 2A(KMT2A)                                  | Homo sapiens |
| 4751 | 11759296_turquoise | mitogen-activated protein kinase kinase kinase 2(MAP3K2)            | Homo sapiens |
| 4752 | 11759300_turquoise | A-kinase anchoring protein 10(AKAP10)                               | Homo sapiens |
| 4753 | 11759320_turquoise | myelin protein zero like 3(MPZL3)                                   | Homo sapiens |
| 4754 | 11759328_turquoise | kinetochore scaffold 1(KNL1)                                        | Homo sapiens |
| 4755 | 11759347_turquoise | TXK tyrosine kinase(TXK)                                            | Homo sapiens |
| 4756 | 11759352_turquoise | Fc receptor like 3(FCRL3)                                           | Homo sapiens |
| 4757 | 11759414_turquoise | glycine cleavage system protein H(GCSH)                             | Homo sapiens |
| 4758 | 11759417_blue      | heat shock protein family A (Hsp70) member 9(HSPA9)                 | Homo sapiens |
| 4759 | 11759444_turquoise | BCL2 associated X, apoptosis regulator(BAX)                         | Homo sapiens |
| 4760 | 11759477_turquoise | ADAM metallopeptidase with thrombospondin type 1 motif 15(ADAMTS15) | Homo sapiens |
| 4761 | 11759496_turquoise | carbohydrate sulfotransferase 11(CHST11)                            | Homo sapiens |
| 4762 | 11759497_turquoise | carbohydrate sulfotransferase 11(CHST11)                            | Homo sapiens |
| 4763 | 11759498_turquoise | family with sequence similarity 49 member A(FAM49A)                 | Homo sapiens |
| 4764 | 11759499_turquoise | family with sequence similarity 49 member A(FAM49A)                 | Homo sapiens |
| 4765 | 11759502_turquoise | TNF receptor associated factor 3(TRAF3)                             | Homo sapiens |
| 4766 | 11759511_turquoise | motile sperm domain containing 2(MOSPD2)                            | Homo sapiens |
| 4767 | 11759512_turquoise | CWC25 spliceosome associated protein homolog(CWC25)                 | Homo sapiens |
| 4768 | 11759519_blue      | succinate-CoA ligase ADP-forming beta subunit(SUCLA2)               | Homo sapiens |
| 4769 | 11759522_brown     | alkB homolog 7(ALKBH7)                                              | Homo sapiens |
| 4770 | 11759523_brown     | alkB homolog 7(ALKBH7)                                              | Homo sapiens |
| 4771 | 11759550_turquoise | ZNF1 antisense RNA 1(ZFAS1)                                         | Homo sapiens |
| 4772 | 11759553_brown     | translocase of inner mitochondrial membrane 8 homolog B(TIMM8B)     | Homo sapiens |
| 4773 | 11759566_turquoise | N-acetylneuraminic acid pyruvate lyase(NPL)                         | Homo sapiens |
| 4774 | 11759569_turquoise | CDK5 regulatory subunit associated protein 3(CDK5RAP3)              | Homo sapiens |
| 4775 | 11759572_turquoise | staufen double-stranded RNA binding protein 2(STAU2)                | Homo sapiens |
| 4776 | 11759573_turquoise | meningioma expressed antigen 5 (hyaluronidase)(MGEA5)               | Homo sapiens |
| 4777 | 11759575_brown     | ubiquinol-cytochrome c reductase hinge protein like(UQCRHL)         | Homo sapiens |
| 4778 | 11759581_turquoise | major histocompatibility complex, class I, B(HLA-B)                 | Homo sapiens |
| 4779 | 11759587_turquoise | HtrA serine peptidase 3(HTRA3)                                      | Homo sapiens |
| 4780 | 11759615_turquoise | pre-mRNA processing factor 38B(PRP38B)                              | Homo sapiens |
| 4781 | 11759619_turquoise | trafficking protein particle complex 10(TRAPPC10)                   | Homo sapiens |
| 4782 | 11759622_turquoise | DEXD-box helicase 21(DDX21)                                         | Homo sapiens |
| 4783 | 11759627_turquoise | microRNA 6125(MIR6125)                                              | Homo sapiens |
| 4784 | 11759629_turquoise | T cell receptor delta variable 2(TRDV2)                             | Homo sapiens |
| 4785 | 11759635_turquoise | THO complex 2(THOC2)                                                | Homo sapiens |
| 4786 | 11759642_turquoise | major histocompatibility complex, class II, DR beta 1(HLA-DRB1)     | Homo sapiens |
| 4787 | 11759645_brown     | COX11, cytochrome c oxidase copper chaperone(COX11)                 | Homo sapiens |
| 4788 | 11759652_yellow    | immunoglobulin kappa constant(IGKC)                                 | Homo sapiens |
| 4789 | 11759657_turquoise | target of myb1 like 1 membrane trafficking protein(TOM1L1)          | Homo sapiens |
| 4790 | 11759663_turquoise | SP100 nuclear antigen(SP100)                                        | Homo sapiens |
| 4791 | 11759666_turquoise | major histocompatibility complex, class II, DP beta 1(HLA-DPB1)     | Homo sapiens |
| 4792 | 11759671_turquoise | potassium calcium-activated channel subfamily M alpha 1(KCNMA1)     | Homo sapiens |
| 4793 | 11759678_turquoise | RAB12, member RAS oncogene family(RAB12)                            | Homo sapiens |
| 4794 | 11759687_brown     | small nuclear RNA activating complex polypeptide 5(SNAPC5)          | Homo sapiens |
| 4795 | 11759729_turquoise | tetratricopeptide repeat domain 14(TTC14)                           | Homo sapiens |
| 4796 | 11759759_turquoise | cyclin L1(CCNL1)                                                    | Homo sapiens |
| 4797 | 11759766_turquoise | major histocompatibility complex, class I-related(MR1)              | Homo sapiens |
| 4798 | 11759767_turquoise | major histocompatibility complex, class I-related(MR1)              | Homo sapiens |

|      |                     |                                                                         |              |
|------|---------------------|-------------------------------------------------------------------------|--------------|
| 4799 | 11759815_ yellow    | immunoglobulin heavy constant mu(IGHM)                                  | Homo sapiens |
| 4800 | 11759816_ yellow    | immunoglobulin heavy constant mu(IGHM)                                  | Homo sapiens |
| 4801 | 11759828_ turquoise | SP100 nuclear antigen(SP100)                                            | Homo sapiens |
| 4802 | 11759833_ turquoise | NADH:ubiquinone oxidoreductase core subunit S7(NDUFS7)                  | Homo sapiens |
| 4803 | 11759852_ yellow    | microRNA 8071-1(MIR8071-1)                                              | Homo sapiens |
| 4804 | 11759854_ turquoise | ribosomal protein S27a(RPS27A)                                          | Homo sapiens |
| 4805 | 11759866_ turquoise | NA                                                                      | NA           |
| 4806 | 11759922_ turquoise | par-3 family cell polarity regulator(PARD3)                             | Homo sapiens |
| 4807 | 11759939_ turquoise | uncharacterized LOC100131541(LOC100131541)                              | Homo sapiens |
| 4808 | 11759973_ turquoise | prenyl (decaprenyl) diphosphate synthase, subunit 1(PDSS1)              | Homo sapiens |
| 4809 | 11760005_ turquoise | DnaJ heat shock protein family (Hsp40) member A1(DNAJA1)                | Homo sapiens |
| 4810 | 11760009_ turquoise | NA                                                                      | NA           |
| 4811 | 11760018_ turquoise | C-type lectin domain family 10 member A(CLEC10A)                        | Homo sapiens |
| 4812 | 11760037_ turquoise | glutaminase(GLS)                                                        | Homo sapiens |
| 4813 | 11760038_ turquoise | glutaminase(GLS)                                                        | Homo sapiens |
| 4814 | 11760085_ turquoise | heterogeneous nuclear ribonucleoprotein A1(HNRNPA1)                     | Homo sapiens |
| 4815 | 11760103_ turquoise | protein kinase cAMP-dependent type II regulatory subunit alpha(PRKAR2A) | Homo sapiens |
| 4816 | 11760124_ turquoise | Kruppel like factor 6(KLF6)                                             | Homo sapiens |
| 4817 | 11760137_ yellow    | immunoglobulin heavy constant alpha 1(IGHA1)                            | Homo sapiens |
| 4818 | 11760143_ turquoise | major histocompatibility complex, class I, F(HLA-F)                     | Homo sapiens |
| 4819 | 11760144_ turquoise | major histocompatibility complex, class I, F(HLA-F)                     | Homo sapiens |
| 4820 | 11760156_ turquoise | Enah/Vasp-like(EVL)                                                     | Homo sapiens |
| 4821 | 11760198_ turquoise | eukaryotic translation initiation factor 4E family member 2(EIF4E2)     | Homo sapiens |
| 4822 | 11760211_ turquoise | CD48 molecule(CD48)                                                     | Homo sapiens |
| 4823 | 11760221_ turquoise | caspase 4(CASP4)                                                        | Homo sapiens |
| 4824 | 11760222_ turquoise | caspase 4(CASP4)                                                        | Homo sapiens |
| 4825 | 11760244_ turquoise | caspase recruitment domain family member 8(CARD8)                       | Homo sapiens |
| 4826 | 11760280_ turquoise | epidermal growth factor receptor pathway substrate 15 like 1(EPS15L1)   | Homo sapiens |
| 4827 | 11760356_ turquoise | peptidase, mitochondrial processing beta subunit(PMPCB)                 | Homo sapiens |
| 4828 | 11760380_ turquoise | septin 6(SEPT6)                                                         | Homo sapiens |
| 4829 | 11760387_ turquoise | interleukin 16(IL16)                                                    | Homo sapiens |
| 4830 | 11760406_ turquoise | major histocompatibility complex, class I, G(HLA-G)                     | Homo sapiens |
| 4831 | 11760426_ turquoise | epidermal growth factor receptor pathway substrate 15 like 1(EPS15L1)   | Homo sapiens |
| 4832 | 11760444_ turquoise | major histocompatibility complex, class I, C(HLA-C)                     | Homo sapiens |
| 4833 | 11760475_ turquoise | serine/threonine kinase 4(STK4)                                         | Homo sapiens |
| 4834 | 11760482_ brown     | NADH:ubiquinone oxidoreductase core subunit S7(NDUFS7)                  | Homo sapiens |
| 4835 | 11760584_ turquoise | YME1 like 1 ATPase(YME1L1)                                              | Homo sapiens |
| 4836 | 11760710_ turquoise | membrane spanning 4-domains A6A(MS4A6A)                                 | Homo sapiens |
| 4837 | 11760776_ turquoise | dermokine(DMKN)                                                         | Homo sapiens |
| 4838 | 11760819_ yellow    | immunoglobulin heavy variable 4-31(IGHV4-31)                            | Homo sapiens |
| 4839 | 11760822_ turquoise | sodium voltage-gated channel beta subunit 1(SCN1B)                      | Homo sapiens |
| 4840 | 11760850_ turquoise | PATJ, crumbs cell polarity complex component(PATJ)                      | Homo sapiens |
| 4841 | 11760878_ turquoise | major histocompatibility complex, class II, DP beta 1(HLA-DPB1)         | Homo sapiens |
| 4842 | 11760881_ turquoise | transcription termination factor 2(TTF2)                                | Homo sapiens |
| 4843 | 11760902_ turquoise | napsin B aspartic peptidase, pseudogene(NAPSB)                          | Homo sapiens |
| 4844 | 11760929_ yellow    | microRNA 8071-1(MIR8071-1)                                              | Homo sapiens |
| 4845 | 11760994_ turquoise | tryptophanyl-tRNA synthetase(WARS)                                      | Homo sapiens |
| 4846 | 11761076_ brown     | acyl-CoA thioesterase 8(ACOT8)                                          | Homo sapiens |
| 4847 | 11761116_ turquoise | family with sequence similarity 65 member B(FAM65B)                     | Homo sapiens |
| 4848 | 11761194_ turquoise | trans-golgi network protein 2(TGOLN2)                                   | Homo sapiens |

|      |                    |                                                                              |              |
|------|--------------------|------------------------------------------------------------------------------|--------------|
| 4849 | 11761343_turquoise | ADAM metallopeptidase domain 8(ADAM8)                                        | Homo sapiens |
| 4850 | 11761390_turquoise | ankyrin repeat domain 10(ANKRD10)                                            | Homo sapiens |
| 4851 | 11761400_turquoise | nucleolar protein interacting with the FHA domain of MKI67(NIFK)             | Homo sapiens |
| 4852 | 11761418_turquoise | interleukin 23 subunit alpha(IL23A)                                          | Homo sapiens |
| 4853 | 11761427_turquoise | dedicator of cytokinesis 8(DOCK8)                                            | Homo sapiens |
| 4854 | 11761446_blue      | staufen double-stranded RNA binding protein 2(STAU2)                         | Homo sapiens |
| 4855 | 11761465_turquoise | NA                                                                           | NA           |
| 4856 | 11761467_yellow    | immunoglobulin heavy constant gamma 3 (G3m marker)(IGHG3)                    | Homo sapiens |
| 4857 | 11761506_turquoise | malic enzyme 3(ME3)                                                          | Homo sapiens |
| 4858 | 11761525_turquoise | interleukin 23 subunit alpha(IL23A)                                          | Homo sapiens |
| 4859 | 11761604_turquoise | RNA binding protein, fox-1 homolog 1(RBFOX1)                                 | Homo sapiens |
| 4860 | 11761671_turquoise | ETS variant 7(ETV7)                                                          | Homo sapiens |
| 4861 | 11761683_turquoise | pyrin and HIN domain family member 1(PYHIN1)                                 | Homo sapiens |
| 4862 | 11761703_turquoise | DnaJ heat shock protein family (Hsp40) member A1(DNAJA1)                     | Homo sapiens |
| 4863 | 11761727_turquoise | aquaporin 7(AQP7)                                                            | Homo sapiens |
| 4864 | 11761758_turquoise | proteasome subunit beta 9(PSMB9)                                             | Homo sapiens |
| 4865 | 11761790_turquoise | YME1 like 1 ATPase(YME1L1)                                                   | Homo sapiens |
| 4866 | 11761796_turquoise | calcitonin receptor like receptor(CALCRL)                                    | Homo sapiens |
| 4867 | 11761918_turquoise | T cell receptor beta constant 1(TRBC1)                                       | Homo sapiens |
| 4868 | 11761959_turquoise | T cell receptor delta variable 2(TRDV2)                                      | Homo sapiens |
| 4869 | 11761960_turquoise | T cell receptor delta variable 2(TRDV2)                                      | Homo sapiens |
| 4870 | 11762018_turquoise | DNA cross-link repair 1C(DCLRE1C)                                            | Homo sapiens |
| 4871 | 11762038_turquoise | zinc finger protein 844(ZNF844)                                              | Homo sapiens |
| 4872 | 11762069_turquoise | septin 6(SEPT6)                                                              | Homo sapiens |
| 4873 | 11762091_yellow    | immunoglobulin heavy locus(IGH)                                              | Homo sapiens |
| 4874 | 11762099_yellow    | immunoglobulin heavy constant alpha 1(IGHA1)                                 | Homo sapiens |
| 4875 | 11762119_turquoise | major histocompatibility complex, class I, A(HLA-A)                          | Homo sapiens |
| 4876 | 11762140_turquoise | butyrophilin like 9(BTNL9)                                                   | Homo sapiens |
| 4877 | 11762150_turquoise | major histocompatibility complex, class I, A(HLA-A)                          | Homo sapiens |
| 4878 | 11762172_turquoise | ETS variant 7(ETV7)                                                          | Homo sapiens |
| 4879 | 11762266_turquoise | interleukin 7 receptor(IL7R)                                                 | Homo sapiens |
| 4880 | 11762274_turquoise | major histocompatibility complex, class II, DM beta(HLA-DMB)                 | Homo sapiens |
| 4881 | 11762275_brown     | ubiquinol-cytochrome c reductase binding protein(UQCRB)                      | Homo sapiens |
| 4882 | 11762282_turquoise | major histocompatibility complex, class I, A(HLA-A)                          | Homo sapiens |
| 4883 | 11762287_turquoise | interleukin 23 subunit alpha(IL23A)                                          | Homo sapiens |
| 4884 | 11762294_turquoise | T cell receptor beta constant 1(TRBC1)                                       | Homo sapiens |
| 4885 | 11762313_turquoise | enoyl-CoA hydratase domain containing 2(ECHDC2)                              | Homo sapiens |
| 4886 | 11762318_turquoise | interleukin 23 subunit alpha(IL23A)                                          | Homo sapiens |
| 4887 | 11762339_turquoise | aldo-keto reductase family 7 member A2(AKR7A2)                               | Homo sapiens |
| 4888 | 11762366_turquoise | recombination signal binding protein for immunoglobulin kappa J region(RBPJ) | Homo sapiens |
| 4889 | 11762406_turquoise | guanylate binding protein 2(GBP2)                                            | Homo sapiens |
| 4890 | 11762432_turquoise | WD repeat domain 31(WDR31)                                                   | Homo sapiens |
| 4891 | 11762456_turquoise | NA                                                                           | NA           |
| 4892 | 11762480_turquoise | SP140 nuclear body protein(SP140)                                            | Homo sapiens |
| 4893 | 11762486_turquoise | fucosyltransferase 6(FUT6)                                                   | Homo sapiens |
| 4894 | 11762641_turquoise | major histocompatibility complex, class II, DQ beta 1(HLA-DQB1)              | Homo sapiens |
| 4895 | 11762736_turquoise | butyrophilin like 9(BTNL9)                                                   | Homo sapiens |
| 4896 | 11762785_turquoise | actin gamma 1(ACTG1)                                                         | Homo sapiens |
| 4897 | 11762851_turquoise | major histocompatibility complex, class I, B(HLA-B)                          | Homo sapiens |
| 4898 | 11762908_turquoise | TNF receptor superfamily member 14(TNFRSF14)                                 | Homo sapiens |

|      |                    |                                                                 |              |
|------|--------------------|-----------------------------------------------------------------|--------------|
| 4899 | 11762936_turquoise | aquaporin 7(AQP7)                                               | Homo sapiens |
| 4900 | 11762940_turquoise | major histocompatibility complex, class I, C(HLA-C)             | Homo sapiens |
| 4901 | 11762993_turquoise | YME1 like 1 ATPase(YME1L1)                                      | Homo sapiens |
| 4902 | 11762996_turquoise | YME1 like 1 ATPase(YME1L1)                                      | Homo sapiens |
| 4903 | 11762998_turquoise | YME1 like 1 ATPase(YME1L1)                                      | Homo sapiens |
| 4904 | 11763032_brown     | adipogenesis associated Mth938 domain containing(AAMDC)         | Homo sapiens |
| 4905 | 11763101_brown     | NADH:ubiquinone oxidoreductase subunit B9(NDUFB9)               | Homo sapiens |
| 4906 | 11763144_yellow    | immunoglobulin kappa constant(IGKC)                             | Homo sapiens |
| 4907 | 11763159_turquoise | YME1 like 1 ATPase(YME1L1)                                      | Homo sapiens |
| 4908 | 11763182_turquoise | CCR4-NOT transcription complex subunit 9(CNOT9)                 | Homo sapiens |
| 4909 | 11763184_turquoise | insulin degrading enzyme(IDE)                                   | Homo sapiens |
| 4910 | 11763186_turquoise | caspase 1(CASP1)                                                | Homo sapiens |
| 4911 | 11763196_turquoise | dymeclin(DYM)                                                   | Homo sapiens |
| 4912 | 11763197_turquoise | dymeclin(DYM)                                                   | Homo sapiens |
| 4913 | 11763201_turquoise | family with sequence similarity 65 member B(FAM65B)             | Homo sapiens |
| 4914 | 11763202_turquoise | family with sequence similarity 65 member B(FAM65B)             | Homo sapiens |
| 4915 | 11763215_turquoise | dermokine(DMKN)                                                 | Homo sapiens |
| 4916 | 11763222_yellow    | immunoglobulin kappa constant(IGKC)                             | Homo sapiens |
| 4917 | 11763233_turquoise | T cell receptor delta variable 2(TRDV2)                         | Homo sapiens |
| 4918 | 11763246_turquoise | major histocompatibility complex, class II, DQ beta 1(HLA-DQB1) | Homo sapiens |
| 4919 | 11763249_yellow    | immunoglobulin heavy locus(IGH)                                 | Homo sapiens |
| 4920 | 11763253_yellow    | NA                                                              | NA           |
| 4921 | 11763271_turquoise | peroxisomal biogenesis factor 11 alpha(PEX11A)                  | Homo sapiens |
| 4922 | 11763274_turquoise | signal induced proliferation associated 1 like 1(SIPA1L1)       | Homo sapiens |
| 4923 | 11763307_turquoise | nuclear factor of activated T-cells 2(NFATC2)                   | Homo sapiens |
| 4924 | 11763310_turquoise | microRNA 21(MIR21)                                              | Homo sapiens |
| 4925 | 11763314_turquoise | ADP ribosylation factor like GTPase 4C(ARL4C)                   | Homo sapiens |
| 4926 | 11763320_turquoise | glutaminase(GLS)                                                | Homo sapiens |
| 4927 | 11763322_turquoise | casein kinase 2 alpha 2(CSNK2A2)                                | Homo sapiens |
| 4928 | 11763329_turquoise | docking protein 1(DOK1)                                         | Homo sapiens |
| 4929 | 11763335_blue      | malate dehydrogenase 2(MDH2)                                    | Homo sapiens |
| 4930 | 11763336_turquoise | uncharacterized protein DKFZp586i1420(DKFZP586I1420)            | Homo sapiens |
| 4931 | 11763353_turquoise | NA                                                              | NA           |
| 4932 | 11763357_turquoise | transmembrane protein 170A(TMEM170A)                            | Homo sapiens |
| 4933 | 11763359_turquoise | NA                                                              | NA           |
| 4934 | 11763365_turquoise | caspase recruitment domain family member 8(CARD8)               | Homo sapiens |
| 4935 | 11763367_turquoise | nucleic acid binding protein 1(NABP1)                           | Homo sapiens |
| 4936 | 11763382_turquoise | uncharacterized LOC101928143(LOC101928143)                      | Homo sapiens |
| 4937 | 11763403_turquoise | CUGBP, Elav-like family member 1(CELF1)                         | Homo sapiens |
| 4938 | 11763408_yellow    | ankyrin repeat domain 36B pseudogene 2(ANKRD36BP2)              | Homo sapiens |
| 4939 | 11763426_turquoise | TRAF3 interacting protein 3(TRAF3IP3)                           | Homo sapiens |
| 4940 | 11763446_turquoise | T cell receptor delta variable 3(TRDV3)                         | Homo sapiens |
| 4941 | 11763447_turquoise | YME1 like 1 ATPase(YME1L1)                                      | Homo sapiens |
| 4942 | 11763472_turquoise | zinc finger CCCH-type containing 12D(ZC3H12D)                   | Homo sapiens |
| 4943 | 11763494_turquoise | FERM domain containing 8(FRMD8)                                 | Homo sapiens |
| 4944 | 11763522_blue      | ryanodine receptor 2(RYR2)                                      | Homo sapiens |
| 4945 | 11763550_yellow    | immunoglobulin kappa constant(IGKC)                             | Homo sapiens |
| 4946 | 11763556_turquoise | eukaryotic translation initiation factor 4A1(EIF4A1)            | Homo sapiens |
| 4947 | 11763557_turquoise | T cell receptor beta constant 1(TRBC1)                          | Homo sapiens |
| 4948 | 11763585_turquoise | thymopoietin(TMPO)                                              | Homo sapiens |

|      |                     |                                                                              |              |
|------|---------------------|------------------------------------------------------------------------------|--------------|
| 4949 | 11763605_turquoise  | Wnt family member 11(WNT11)                                                  | Homo sapiens |
| 4950 | 11763606_turquoise  | vav guanine nucleotide exchange factor 1(VAV1)                               | Homo sapiens |
| 4951 | 11763627_blue       | solute carrier family 25 member 10(SLC25A10)                                 | Homo sapiens |
| 4952 | 11763640_yellow     | immunoglobulin kappa constant(IGKC)                                          | Homo sapiens |
| 4953 | 11763663_yellow     | immunoglobulin kappa constant(IGKC)                                          | Homo sapiens |
| 4954 | 11763684_yellow     | immunoglobulin kappa constant(IGKC)                                          | Homo sapiens |
| 4955 | 11763693_turquoise  | glutaminase(GLS)                                                             | Homo sapiens |
| 4956 | 11763699_blue       | cytoplasmic linker associated protein 2(CLASP2)                              | Homo sapiens |
| 4957 | 11763704_turquoise  | spermidine/spermine N1-acetyltransferase 1(SAT1)                             | Homo sapiens |
| 4958 | 11763715_turquoise  | granulysin(GNLY)                                                             | Homo sapiens |
| 4959 | 11763726_turquoise  | small nucleolar RNA, H/ACA box 70(SNORA70)                                   | Homo sapiens |
| 4960 | 11763735_turquoise  | Fc receptor like 3(FCRL3)                                                    | Homo sapiens |
| 4961 | 11763756_turquoise  | granulysin(GNLY)                                                             | Homo sapiens |
| 4962 | 11763776_turquoise  | thymocyte selection associated family member 2(THEMIS2)                      | Homo sapiens |
| 4963 | 11763862_turquoise  | SH3 domain binding glutamate rich protein like(SH3BGRL)                      | Homo sapiens |
| 4964 | 11763960_brown      | NADH:ubiquinone oxidoreductase subunit B3(NDUFB3)                            | Homo sapiens |
| 4965 | 11763986_turquoise  | apolipoprotein L1(APOL1)                                                     | Homo sapiens |
| 4966 | 11763990_brown      | alkB homolog 7(ALKBH7)                                                       | Homo sapiens |
| 4967 | 11764017_turquoise  | aph-1 homolog A, gamma-secretase subunit(APH1A)                              | Homo sapiens |
| 4968 | 11764037_turquoise  | DnaJ heat shock protein family (Hsp40) member A1(DNAJA1)                     | Homo sapiens |
| 4969 | 11764046_yellow     | immunoglobulin heavy constant mu(IGHM)                                       | Homo sapiens |
| 4970 | 11764053_turquoise  | recombination signal binding protein for immunoglobulin kappa J region(RBPJ) | Homo sapiens |
| 4971 | 11764085_turquoise  | NA                                                                           | NA           |
| 4972 | 11764130_yellow     | immunoglobulin heavy locus(IGH)                                              | Homo sapiens |
| 4973 | 11764146_turquoise  | motile sperm domain containing 2(MOSPD2)                                     | Homo sapiens |
| 4974 | 11764172_turquoise  | uncharacterized LOC102724880(LOC102724880)                                   | Homo sapiens |
| 4975 | 11764239_turquoise  | transforming growth factor beta regulator 1(TBRG1)                           | Homo sapiens |
| 4976 | 11764248_turquoise  | low density lipoprotein receptor class A domain containing 3(LDLRAD3)        | Homo sapiens |
| 4977 | 200003_P1turquoise  | microRNA 6805(MIR6805)                                                       | Homo sapiens |
| 4978 | 200009_P1turquoise  | GDP dissociation inhibitor 2(GDI2)                                           | Homo sapiens |
| 4979 | 200011_P1turquoise  | ADP ribosylation factor 3(ARF3)                                              | Homo sapiens |
| 4980 | 200015_P1turquoise  | septin 2(SEPT2)                                                              | Homo sapiens |
| 4981 | 200021_P1turquoise  | cofilin 1(CFL1)                                                              | Homo sapiens |
| 4982 | 200030_P1blue       | solute carrier family 25 member 3(SLC25A3)                                   | Homo sapiens |
| 4983 | 200033_P1turquoise  | microRNA 3064(MIR3064)                                                       | Homo sapiens |
| 4984 | 200037_P1turquoise  | chromobox 3(CBX3)                                                            | Homo sapiens |
| 4985 | 200044_P1turquoise  | glutamyl-tRNA amidotransferase subunit C(GATC)                               | Homo sapiens |
| 4986 | 200057_P1turquoise  | non-POU domain containing, octamer-binding(NONO)                             | Homo sapiens |
| 4987 | 200059_P1turquoise  | ras homolog family member A(RHOA)                                            | Homo sapiens |
| 4988 | 200086_P1brown      | cytochrome c oxidase subunit 4I1(COX4I1)                                     | Homo sapiens |
| 4989 | AFFX-BkGr_turquoise | NA                                                                           | NA           |
| 4990 | AFFX-BkGr_turquoise | NA                                                                           | NA           |
| 4991 | AFFX-BkGr_turquoise | NA                                                                           | NA           |
| 4992 | AFFX-BkGr_turquoise | NA                                                                           | NA           |
| 4993 | AFFX-BkGr_turquoise | NA                                                                           | NA           |
| 4994 | AFFX-BkGr_turquoise | NA                                                                           | NA           |
| 4995 | AFFX-HSAC_turquoise | actin beta(ACTB)                                                             | Homo sapiens |
| 4996 | AFFX-HSAC_turquoise | actin beta(ACTB)                                                             | Homo sapiens |
| 4997 | AFFX-HUM_turquoise  | signal transducer and activator of transcription 1(STAT1)                    | Homo sapiens |
| 4998 | AFFX-HUM_turquoise  | signal transducer and activator of transcription 1(STAT1)                    | Homo sapiens |

4999 AFFX-HUM turquoise signal transducer and activator of transcription 1(STAT1)  
5000 AFFX-HUM turquoise signal transducer and activator of transcription 1(STAT1)

Homo sapiens  
Homo sapiens

| <b>Module Color</b> | <b>Module Size</b> | <b>Correlation with binary trait rejection vs non rejection</b> |
|---------------------|--------------------|-----------------------------------------------------------------|
| Turquoise           | 4314               | 0.77                                                            |
| Yellow              | 31                 | 0.51                                                            |
| Blue                | 317                | -0.5                                                            |
| Brown               | 332                | -0.53                                                           |
| Unassigned gene     | 6                  |                                                                 |

WGCNA module assignment for the top 5,000 most significantly differentially expressed genes comparing rejection vs. non-rejection by Wilcoxon testing



**Turquoise Module**

| gene              | hcolor    | Name                                                                               | Species      |
|-------------------|-----------|------------------------------------------------------------------------------------|--------------|
| 1 11715189_s_at   | turquoise | microRNA 4738(MIR4738)                                                             | Homo sapiens |
| 2 11715193_s_at   | turquoise | UNC homeobox(UNCX)                                                                 | Homo sapiens |
| 3 11715207_at     | turquoise | WDFY family member 4(WDFY4)                                                        | Homo sapiens |
| 4 11715239_x_at   | turquoise | interferon induced transmembrane protein 3(IFITM3)                                 | Homo sapiens |
| 5 11715291_s_at   | turquoise | T-box 5(TBX5)                                                                      | Homo sapiens |
| 8 11715346_at     | turquoise | Epstein-Barr virus induced 3(EBI3)                                                 | Homo sapiens |
| 10 11715359_a_at  | turquoise | TIMP metalloproteinase inhibitor 1(TIMPI)                                          | Homo sapiens |
| 11 11715360_x_at  | turquoise | TIMP metalloproteinase inhibitor 1(TIMPI)                                          | Homo sapiens |
| 12 11715363_a_at  | turquoise | alpha-2-macroglobulin(A2M)                                                         | Homo sapiens |
| 13 11715367_s_at  | turquoise | septin 2(SEPT2)                                                                    | Homo sapiens |
| 15 11715370_s_at  | turquoise | galectin 3 binding protein(LGALS3BP)                                               | Homo sapiens |
| 17 11715388_s_at  | turquoise | cyclin dependent kinase inhibitor 1A(CDKN1A)                                       | Homo sapiens |
| 18 11715390_s_at  | turquoise | FK506 binding protein 1A(FKBP1A)                                                   | Homo sapiens |
| 19 11715401_s_at  | turquoise | interleukin enhancer binding factor 2(ILF2)                                        | Homo sapiens |
| 22 11715419_at    | turquoise | lymphocyte antigen 6 complex, locus E(LY6E)                                        | Homo sapiens |
| 23 11715439_at    | turquoise | death associated protein(DAP)                                                      | Homo sapiens |
| 24 11715451_a_at  | turquoise | collagen type IV alpha 2 chain(COL4A2)                                             | Homo sapiens |
| 25 11715452_s_at  | turquoise | collagen type IV alpha 2 chain(COL4A2)                                             | Homo sapiens |
| 26 11715453_a_at  | turquoise | collagen type IV alpha 2 chain(COL4A2)                                             | Homo sapiens |
| 29 11715461_at    | turquoise | lysozyme(LYZ)                                                                      | Homo sapiens |
| 30 11715462_x_at  | turquoise | lysozyme(LYZ)                                                                      | Homo sapiens |
| 31 11715466_at    | turquoise | Rho GDP dissociation inhibitor beta(ARHGDI B)                                      | Homo sapiens |
| 32 11715467_s_at  | turquoise | Rho GDP dissociation inhibitor beta(ARHGDI B)                                      | Homo sapiens |
| 33 11715476_s_at  | turquoise | DEAD-box helicase 17(DDX17)                                                        | Homo sapiens |
| 34 11715482_a_at  | turquoise | BCL2 family apoptosis regulator(MCL1)                                              | Homo sapiens |
| 35 11715483_s_at  | turquoise | BCL2 family apoptosis regulator(MCL1)                                              | Homo sapiens |
| 36 11715487_a_at  | turquoise | BCL2 family apoptosis regulator(MCL1)                                              | Homo sapiens |
| 39 11715503_a_at  | turquoise | LIM and SH3 protein 1(LASP1)                                                       | Homo sapiens |
| 40 11715524_a_at  | turquoise | coactosin like F-actin binding protein 1(COTL1)                                    | Homo sapiens |
| 41 11715532_a_at  | turquoise | interferon gamma receptor 2 (interferon gamma transducer 1)(IFNGR2)                | Homo sapiens |
| 42 11715541_a_at  | turquoise | Thy-1 cell surface antigen(THY1)                                                   | Homo sapiens |
| 43 11715542_s_at  | turquoise | Thy-1 cell surface antigen(THY1)                                                   | Homo sapiens |
| 44 11715583_s_at  | turquoise | major histocompatibility complex, class II, DP alpha 1(HLA-DPA1)                   | Homo sapiens |
| 45 11715593_s_at  | turquoise | tyrosine 3-monooxygenase/tryptophan 5-monooxygenase activation protein eta(YVWHAH) | Homo sapiens |
| 46 11715606_a_at  | turquoise | TSC22 domain family member 1(TSC22D1)                                              | Homo sapiens |
| 47 11715608_x_at  | turquoise | peptidylprolyl isomerase B(PPIB)                                                   | Homo sapiens |
| 50 11715623_s_at  | turquoise | ring finger protein 114(RNF114)                                                    | Homo sapiens |
| 51 11715624_a_at  | turquoise | SH3 domain binding glutamate rich protein like(SH3BGRL)                            | Homo sapiens |
| 52 11715625_a_at  | turquoise | SH3 domain binding glutamate rich protein like(SH3BGRL)                            | Homo sapiens |
| 53 11715638_s_at  | turquoise | lysophosphatidylcholine acyltransferase 1(LPCAT1)                                  | Homo sapiens |
| 54 11715644_s_at  | turquoise | ATPase H+ transporting accessory protein 2(ATP6AP2)                                | Homo sapiens |
| 57 11715665_a_at  | turquoise | proteasome subunit beta 8(PSMB8)                                                   | Homo sapiens |
| 58 11715667_s_at  | turquoise | tropomyosin 3(TPM3)                                                                | Homo sapiens |
| 59 11715670_a_at  | turquoise | interferon induced transmembrane protein 1(IFITM1)                                 | Homo sapiens |
| 60 11715671_x_at  | turquoise | interferon induced transmembrane protein 1(IFITM1)                                 | Homo sapiens |
| 61 11715684_a_at  | turquoise | pyrophosphatase (inorganic) 1(PPA1)                                                | Homo sapiens |
| 62 11715685_s_at  | turquoise | actin related protein 2/3 complex subunit 5(ARPC5)                                 | Homo sapiens |
| 63 11715686_s_at  | turquoise | actin related protein 2/3 complex subunit 5(ARPC5)                                 | Homo sapiens |
| 64 11715687_x_at  | turquoise | actin related protein 2/3 complex subunit 5(ARPC5)                                 | Homo sapiens |
| 65 11715691_s_at  | turquoise | ZFP36 ring finger protein(ZFP36)                                                   | Homo sapiens |
| 68 11715710_s_at  | turquoise | cathepsin C(CTSC)                                                                  | Homo sapiens |
| 69 11715716_at    | turquoise | moesin(MSN)                                                                        | Homo sapiens |
| 70 11715717_s_at  | turquoise | moesin(MSN)                                                                        | Homo sapiens |
| 71 11715722_a_at  | turquoise | golgi membrane protein 1(GOLM1)                                                    | Homo sapiens |
| 72 11715742_s_at  | turquoise | regulator of chromosome condensation 2(RCC2)                                       | Homo sapiens |
| 73 11715743_x_at  | turquoise | regulator of chromosome condensation 2(RCC2)                                       | Homo sapiens |
| 75 11715767_s_at  | turquoise | acetyl-CoA acyltransferase 2(ACA2)                                                 | Homo sapiens |
| 76 11715770_x_at  | turquoise | SET nuclear proto-oncogene(SET)                                                    | Homo sapiens |
| 78 11715788_a_at  | turquoise | solute carrier family 40 member 1(SLC40A1)                                         | Homo sapiens |
| 79 11715817_at    | turquoise | ZFP36 ring finger protein like 2(ZFP36L2)                                          | Homo sapiens |
| 80 11715818_at    | turquoise | ZFP36 ring finger protein like 2(ZFP36L2)                                          | Homo sapiens |
| 81 11715827_s_at  | turquoise | polyhomeotic homolog 1(PHC1)                                                       | Homo sapiens |
| 82 11715836_x_at  | turquoise | proteasome subunit alpha 3(PMSA3)                                                  | Homo sapiens |
| 83 11715839_a_at  | turquoise | succinate dehydrogenase complex subunit C(SDHC)                                    | Homo sapiens |
| 84 11715855_a_at  | turquoise | prolylcarboxypeptidase(PRPC)                                                       | Homo sapiens |
| 85 11715856_s_at  | turquoise | prolylcarboxypeptidase(PRPC)                                                       | Homo sapiens |
| 87 11715868_a_at  | turquoise | TERF1 interacting nuclear factor 2(TINF2)                                          | Homo sapiens |
| 88 11715869_x_at  | turquoise | TERF1 interacting nuclear factor 2(TINF2)                                          | Homo sapiens |
| 92 11715884_a_at  | turquoise | transmembrane protein 248(TM248)                                                   | Homo sapiens |
| 93 11715893_s_at  | turquoise | interferon alpha inducible protein 27(IFI27)                                       | Homo sapiens |
| 94 11715897_at    | turquoise | scavenger receptor class B member 2(SCARB2)                                        | Homo sapiens |
| 96 11715908_at    | turquoise | myosin VI(MYO6)                                                                    | Homo sapiens |
| 97 11715915_a_at  | turquoise | CD44 molecule (Indian blood group)(CD44)                                           | Homo sapiens |
| 98 11715916_a_at  | turquoise | CD44 molecule (Indian blood group)(CD44)                                           | Homo sapiens |
| 99 11715917_a_at  | turquoise | CD44 molecule (Indian blood group)(CD44)                                           | Homo sapiens |
| 100 11715919_a_at | turquoise | SH3 domain binding glutamate rich protein like 3(SH3BGRL3)                         | Homo sapiens |
| 101 11715921_a_at | turquoise | septin 9(SEPT9)                                                                    | Homo sapiens |
| 102 11715922_x_at | turquoise | septin 9(SEPT9)                                                                    | Homo sapiens |
| 103 11715925_a_at | turquoise | translocation associated membrane protein 1(TRAM1)                                 | Homo sapiens |
| 104 11715931_s_at | turquoise | serum/glucocorticoid regulated kinase 1(SGK1)                                      | Homo sapiens |

|     |               |           |                                                                         |              |
|-----|---------------|-----------|-------------------------------------------------------------------------|--------------|
| 105 | 11715935_a_at | turquoise | neurobeachin like 2(NBEAL2)                                             | Homo sapiens |
| 106 | 11715936_x_at | turquoise | neurobeachin like 2(NBEAL2)                                             | Homo sapiens |
| 107 | 11715948_at   | turquoise | potassium channel tetramerization domain containing 12(KCTD12)          | Homo sapiens |
| 108 | 11715949_s_at | turquoise | potassium channel tetramerization domain containing 12(KCTD12)          | Homo sapiens |
| 109 | 11715966_s_at | turquoise | abhydrolase domain containing 17A(ABHD17A)                              | Homo sapiens |
| 112 | 11715994_x_at | turquoise | inhibitor of DNA binding 2, HLH protein(ID2)                            | Homo sapiens |
| 115 | 11716012_at   | turquoise | TNF alpha induced protein 1(TNFAIP1)                                    | Homo sapiens |
| 116 | 11716015_a_at | turquoise | CKLF like MARVEL transmembrane domain containing 3(CMTM3)               | Homo sapiens |
| 117 | 11716018_s_at | turquoise | RAB31, member RAS oncogene family(RAB31)                                | Homo sapiens |
| 118 | 11716019_at   | turquoise | RAB31, member RAS oncogene family(RAB31)                                | Homo sapiens |
| 121 | 11716031_s_at | turquoise | ADP ribosylation factor 3(ARF3)                                         | Homo sapiens |
| 122 | 11716034_a_at | turquoise | bone marrow stromal cell antigen 2(BST2)                                | Homo sapiens |
| 123 | 11716035_at   | turquoise | bone marrow stromal cell antigen 2(BST2)                                | Homo sapiens |
| 124 | 11716036_x_at | turquoise | bone marrow stromal cell antigen 2(BST2)                                | Homo sapiens |
| 126 | 11716055_s_at | turquoise | stathmin 3(STMN3)                                                       | Homo sapiens |
| 128 | 11716062_a_at | turquoise | tenascin C(TNC)                                                         | Homo sapiens |
| 129 | 11716063_at   | turquoise | tenascin C(TNC)                                                         | Homo sapiens |
| 130 | 11716071_s_at | turquoise | Pim-3 proto-oncogene, serine/threonine kinase(PIM3)                     | Homo sapiens |
| 131 | 11716072_s_at | turquoise | ATPase H+ transporting V1 subunit B2(ATP6V1B2)                          | Homo sapiens |
| 132 | 11716093_a_at | turquoise | Kruppel like factor 6(KLF6)                                             | Homo sapiens |
| 133 | 11716095_s_at | turquoise | Kruppel like factor 6(KLF6)                                             | Homo sapiens |
| 134 | 11716103_a_at | turquoise | proliferating cell nuclear antigen(PCNA)                                | Homo sapiens |
| 135 | 11716115_s_at | turquoise | ZFP36 ring finger protein like 1(ZFP36L1)                               | Homo sapiens |
| 137 | 11716118_a_at | turquoise | protein disulfide isomerase family A member 4(PDIA4)                    | Homo sapiens |
| 138 | 11716119_x_at | turquoise | protein disulfide isomerase family A member 4(PDIA4)                    | Homo sapiens |
| 139 | 11716121_s_at | turquoise | apoptosis inhibitor 5(API5)                                             | Homo sapiens |
| 140 | 11716135_a_at | turquoise | major vault protein(MVP)                                                | Homo sapiens |
| 141 | 11716167_a_at | turquoise | MX dynamin like GTPase 1(MX1)                                           | Homo sapiens |
| 142 | 11716171_s_at | turquoise | lamin B2(LMN2)                                                          | Homo sapiens |
| 143 | 11716181_x_at | turquoise | mediator complex subunit 15(MED15)                                      | Homo sapiens |
| 144 | 11716186_s_at | turquoise | activated leukocyte cell adhesion molecule(ALCAM)                       | Homo sapiens |
| 149 | 11716226_a_at | turquoise | LIM domain and actin binding 1(LIMA1)                                   | Homo sapiens |
| 151 | 11716245_at   | turquoise | WAS protein family member 2(WASF2)                                      | Homo sapiens |
| 152 | 11716249_x_at | turquoise | transmembrane p24 trafficking protein 9(TMED9)                          | Homo sapiens |
| 153 | 11716267_at   | turquoise | adenylate kinase 1(AK1)                                                 | Homo sapiens |
| 154 | 11716268_at   | turquoise | adenylate kinase 1(AK1)                                                 | Homo sapiens |
| 155 | 11716274_a_at | turquoise | endosulfine alpha(ENSA)                                                 | Homo sapiens |
| 156 | 11716275_a_at | turquoise | chromobox 5(CBX5)                                                       | Homo sapiens |
| 157 | 11716283_at   | turquoise | poly(A) RNA polymerase D7, non-canonical(PAPD7)                         | Homo sapiens |
| 158 | 11716284_s_at | turquoise | glyoxalase I(GLO1)                                                      | Homo sapiens |
| 159 | 11716288_s_at | turquoise | extended synaptotagmin 1(ESYT1)                                         | Homo sapiens |
| 160 | 11716294_a_at | turquoise | cysteinyl-tRNA synthetase(CARS)                                         | Homo sapiens |
| 161 | 11716307_at   | turquoise | ubiquinol-cytochrome c reductase, complex III subunit XI(UQCRI1)        | Homo sapiens |
| 163 | 11716337_s_at | turquoise | insulin induced gene 1(INSIG1)                                          | Homo sapiens |
| 164 | 11716339_a_at | turquoise | insulin induced gene 1(INSIG1)                                          | Homo sapiens |
| 168 | 11716358_s_at | turquoise | protein regulator of cytokinesis 1(PRC1)                                | Homo sapiens |
| 169 | 11716367_s_at | turquoise | proline rich 13(PRR13)                                                  | Homo sapiens |
| 170 | 11716368_x_at | turquoise | proline rich 13(PRR13)                                                  | Homo sapiens |
| 171 | 11716377_s_at | turquoise | granulin precursor(GRN)                                                 | Homo sapiens |
| 174 | 11716384_at   | turquoise | C-C motif chemokine ligand 2(CCL2)                                      | Homo sapiens |
| 175 | 11716385_at   | turquoise | transforming growth factor beta 1(TGFB1)                                | Homo sapiens |
| 177 | 11716395_a_at | turquoise | adhesion G protein-coupled receptor G1(ADGRG1)                          | Homo sapiens |
| 178 | 11716403_at   | turquoise | eukaryotic translation initiation factor 4E binding protein 2(EIF4EBP2) | Homo sapiens |
| 180 | 11716416_at   | turquoise | complement C1q A chain(C1QA)                                            | Homo sapiens |
| 184 | 11716450_s_at | turquoise | raftlin, lipid raft linker 1(RFTN1)                                     | Homo sapiens |
| 185 | 11716466_s_at | turquoise | iron-sulfur cluster assembly 1(ISCA1)                                   | Homo sapiens |
| 186 | 11716467_x_at | turquoise | iron-sulfur cluster assembly 1(ISCA1)                                   | Homo sapiens |
| 188 | 11716470_at   | turquoise | ubiquinol-cytochrome c reductase binding protein(UQCRB)                 | Homo sapiens |
| 190 | 11716479_s_at | turquoise | coagulation factor XIII A chain(F13A1)                                  | Homo sapiens |
| 191 | 11716485_at   | turquoise | serine/threonine kinase 38(STK38)                                       | Homo sapiens |
| 192 | 11716513_a_at | turquoise | molybdenum cofactor synthesis 2(MOCS2)                                  | Homo sapiens |
| 194 | 11716533_a_at | turquoise | palmitoyl-protein thioesterase 1(PPT1)                                  | Homo sapiens |
| 195 | 11716534_s_at | turquoise | palmitoyl-protein thioesterase 1(PPT1)                                  | Homo sapiens |
| 196 | 11716554_a_at | turquoise | major histocompatibility complex, class II, DM alpha(HLA-DMA)           | Homo sapiens |
| 199 | 11716564_a_at | turquoise | serologically defined colon cancer antigen 3(SDCCAG3)                   | Homo sapiens |
| 200 | 11716567_a_at | turquoise | proline rich coiled-coil 2C(PRR2C)                                      | Homo sapiens |
| 201 | 11716598_a_at | turquoise | charged multivesicular body protein 1A(CHMP1A)                          | Homo sapiens |
| 202 | 11716599_s_at | turquoise | charged multivesicular body protein 1A(CHMP1A)                          | Homo sapiens |
| 205 | 11716618_at   | turquoise | SS18 like 2(SS18L2)                                                     | Homo sapiens |
| 206 | 11716633_a_at | turquoise | transmembrane protein 50A(TMEM50A)                                      | Homo sapiens |
| 207 | 11716638_s_at | turquoise | collagen type IV alpha 1 chain(COL4A1)                                  | Homo sapiens |
| 208 | 11716639_a_at | turquoise | collagen type IV alpha 1 chain(COL4A1)                                  | Homo sapiens |
| 209 | 11716640_a_at | turquoise | proteasome subunit beta 10(PSMB10)                                      | Homo sapiens |
| 210 | 11716641_x_at | turquoise | proteasome subunit beta 10(PSMB10)                                      | Homo sapiens |
| 211 | 11716646_a_at | turquoise | histocompatibility minor 13(HM13)                                       | Homo sapiens |
| 212 | 11716647_x_at | turquoise | histocompatibility minor 13(HM13)                                       | Homo sapiens |
| 213 | 11716650_a_at | turquoise | ubiquitin conjugating enzyme E2 Z(UBE2Z)                                | Homo sapiens |
| 214 | 11716651_a_at | turquoise | ubiquitin conjugating enzyme E2 Z(UBE2Z)                                | Homo sapiens |
| 215 | 11716653_x_at | turquoise | echinoderm microtubule associated protein like 4(EML4)                  | Homo sapiens |
| 216 | 11716654_a_at | turquoise | echinoderm microtubule associated protein like 4(EML4)                  | Homo sapiens |
| 217 | 11716662_at   | turquoise | sushi domain containing 6(SUSD6)                                        | Homo sapiens |
| 218 | 11716666_a_at | turquoise | inhibitor of DNA binding 3, HLH protein(ID3)                            | Homo sapiens |

|     |               |           |                                                                                 |              |
|-----|---------------|-----------|---------------------------------------------------------------------------------|--------------|
| 219 | 11716682_s_at | turquoise | solute carrier family 39 member 9(SLC39A9)                                      | Homo sapiens |
| 220 | 11716683_x_at | turquoise | solute carrier family 39 member 9(SLC39A9)                                      | Homo sapiens |
| 223 | 11716733_at   | turquoise | interferon regulatory factor 1(IRF1)                                            | Homo sapiens |
| 224 | 11716734_at   | turquoise | interferon regulatory factor 1(IRF1)                                            | Homo sapiens |
| 225 | 11716739_x_at | turquoise | GRAM domain containing 1A(GRAMD1A)                                              | Homo sapiens |
| 226 | 11716746_a_at | turquoise | family with sequence similarity 60 member A(FAM60A)                             | Homo sapiens |
| 227 | 11716759_a_at | turquoise | caspase 4(CASP4)                                                                | Homo sapiens |
| 228 | 11716760_x_at | turquoise | caspase 4(CASP4)                                                                | Homo sapiens |
| 229 | 11716765_s_at | turquoise | IQ motif containing GTPase activating protein 1(IQGAP1)                         | Homo sapiens |
| 230 | 11716766_a_at | turquoise | IQ motif containing GTPase activating protein 1(IQGAP1)                         | Homo sapiens |
| 231 | 11716767_at   | turquoise | IQ motif containing GTPase activating protein 1(IQGAP1)                         | Homo sapiens |
| 232 | 11716771_s_at | turquoise | salt inducible kinase 1(SIK1)                                                   | Homo sapiens |
| 233 | 11716774_a_at | turquoise | retinoic acid induced 14(RAI14)                                                 | Homo sapiens |
| 234 | 11716775_a_at | turquoise | retinoic acid induced 14(RAI14)                                                 | Homo sapiens |
| 235 | 11716787_a_at | turquoise | beta-1,4-glucuronyltransferase 1(B4GAT1)                                        | Homo sapiens |
| 236 | 11716788_at   | turquoise | beta-1,4-glucuronyltransferase 1(B4GAT1)                                        | Homo sapiens |
| 237 | 11716792_s_at | turquoise | uncharacterized LOC440034(DKFZp686K1684)                                        | Homo sapiens |
| 238 | 11716793_a_at | turquoise | cyclin B2(CCNB2)                                                                | Homo sapiens |
| 239 | 11716794_a_at | turquoise | myosin light chain 6(MYL6)                                                      | Homo sapiens |
| 240 | 11716795_s_at | turquoise | interferon gamma inducible protein 16(IFI16)                                    | Homo sapiens |
| 241 | 11716796_s_at | turquoise | interferon gamma inducible protein 16(IFI16)                                    | Homo sapiens |
| 242 | 11716797_s_at | turquoise | lamin B receptor(LBR)                                                           | Homo sapiens |
| 243 | 11716800_at   | turquoise | Fas associated via death domain(FADD)                                           | Homo sapiens |
| 244 | 11716828_a_at | turquoise | NPC intracellular cholesterol transporter 2(NPC2)                               | Homo sapiens |
| 245 | 11716842_a_at | turquoise | CD53 molecule(CD53)                                                             | Homo sapiens |
| 246 | 11716846_a_at | turquoise | membrane spanning 4-domains A6A(MS4A6A)                                         | Homo sapiens |
| 247 | 11716847_a_at | turquoise | solute carrier family 43 member 3(SLC43A3)                                      | Homo sapiens |
| 248 | 11716848_a_at | turquoise | phosphatidylinositol-3,4,5-trisphosphate dependent Rac exchange factor 1(PREX1) | Homo sapiens |
| 249 | 11716849_s_at | turquoise | phosphatidylinositol-3,4,5-trisphosphate dependent Rac exchange factor 1(PREX1) | Homo sapiens |
| 250 | 11716850_s_at | turquoise | major facilitator superfamily domain containing 14B(MFSD14B)                    | Homo sapiens |
| 252 | 11716865_a_at | turquoise | solute carrier family 1 member 5(SLC1A5)                                        | Homo sapiens |
| 253 | 11716866_x_at | turquoise | solute carrier family 1 member 5(SLC1A5)                                        | Homo sapiens |
| 254 | 11716867_at   | turquoise | fem-1 homolog A(FEM1A)                                                          | Homo sapiens |
| 255 | 11716868_a_at | turquoise | UTP18, small subunit processome component(UTP18)                                | Homo sapiens |
| 256 | 11716883_s_at | turquoise | RAP1B, member of RAS oncogene family(RAP1B)                                     | Homo sapiens |
| 257 | 11716888_s_at | turquoise | hexosaminidase subunit alpha(HEXA)                                              | Homo sapiens |
| 259 | 11716895_s_at | turquoise | ISG15 ubiquitin-like modifier(ISG15)                                            | Homo sapiens |
| 261 | 11716901_s_at | turquoise | trans-golgi network protein 2(TGOLN2)                                           | Homo sapiens |
| 262 | 11716904_s_at | turquoise | trans-golgi network protein 2(TGOLN2)                                           | Homo sapiens |
| 263 | 11716908_a_at | turquoise | ribonuclease T2(RNASET2)                                                        | Homo sapiens |
| 264 | 11716918_a_at | turquoise | N-acetylglucosamine kinase(NAGK)                                                | Homo sapiens |
| 265 | 11716920_at   | turquoise | plasmalemma vesicle associated protein(PLVAP)                                   | Homo sapiens |
| 267 | 11716938_a_at | turquoise | Sec61 translocon beta subunit(SEC61B)                                           | Homo sapiens |
| 268 | 11716939_a_at | turquoise | heme oxygenase 1(HMOX1)                                                         | Homo sapiens |
| 269 | 11716941_at   | turquoise | tribbles pseudokinase 2(TRIB2)                                                  | Homo sapiens |
| 270 | 11716945_s_at | turquoise | twinfilin actin binding protein 1(TWF1)                                         | Homo sapiens |
| 272 | 11716962_a_at | turquoise | protein phosphatase, Mg2+/Mn2+ dependent 1F(PPM1F)                              | Homo sapiens |
| 273 | 11716963_a_at | turquoise | protein phosphatase, Mg2+/Mn2+ dependent 1F(PPM1F)                              | Homo sapiens |
| 274 | 11716972_s_at | turquoise | N-ethylmaleimide sensitive factor, vesicle fusing ATPase(NSF)                   | Homo sapiens |
| 276 | 11716986_a_at | turquoise | general transcription factor IIB(GTF2B)                                         | Homo sapiens |
| 277 | 11716993_a_at | turquoise | colony stimulating factor 1 receptor(CSF1R)                                     | Homo sapiens |
| 278 | 11717012_s_at | turquoise | vesicle associated membrane protein 8(VAMP8)                                    | Homo sapiens |
| 279 | 11717045_a_at | turquoise | complement C2(C2)                                                               | Homo sapiens |
| 280 | 11717051_s_at | turquoise | signal sequence receptor subunit 1(SSR1)                                        | Homo sapiens |
| 282 | 11717104_a_at | turquoise | glyoxylate and hydroxypyruvate reductase(GRHPR)                                 | Homo sapiens |
| 283 | 11717114_a_at | turquoise | SPT16 homolog, facilitates chromatin remodeling subunit(SUPT16H)                | Homo sapiens |
| 284 | 11717127_a_at | turquoise | alanyl aminopeptidase, membrane(ANPEP)                                          | Homo sapiens |
| 285 | 11717153_a_at | turquoise | adipocyte plasma membrane associated protein(APMAP)                             | Homo sapiens |
| 286 | 11717160_a_at | turquoise | clathrin light chain A(CLTA)                                                    | Homo sapiens |
| 287 | 11717163_s_at | turquoise | cell division cycle 20(CDC20)                                                   | Homo sapiens |
| 288 | 11717167_a_at | turquoise | lysine demethylase 2A(KDM2A)                                                    | Homo sapiens |
| 289 | 11717178_a_at | turquoise | signal transducer and activator of transcription 5A(STAT5A)                     | Homo sapiens |
| 290 | 11717188_s_at | turquoise | DnaJ heat shock protein family (Hsp40) member A1(DNAJA1)                        | Homo sapiens |
| 291 | 11717189_x_at | turquoise | DnaJ heat shock protein family (Hsp40) member A1(DNAJA1)                        | Homo sapiens |
| 292 | 11717211_a_at | turquoise | neogenin 1(NEO1)                                                                | Homo sapiens |
| 293 | 11717217_at   | turquoise | serine/threonine kinase 10(STK10)                                               | Homo sapiens |
| 294 | 11717218_a_at | turquoise | serine/threonine kinase 10(STK10)                                               | Homo sapiens |
| 295 | 11717228_at   | turquoise | cerebellar degeneration-related protein 2(LOC101060399)                         | Homo sapiens |
| 298 | 11717256_at   | turquoise | Pim-1 proto-oncogene, serine/threonine kinase(PIM1)                             | Homo sapiens |
| 299 | 11717257_s_at | turquoise | Pim-1 proto-oncogene, serine/threonine kinase(PIM1)                             | Homo sapiens |
| 300 | 11717281_a_at | turquoise | ArfGAP with SH3 domain, ankyrin repeat and PH domain 1(ASAP1)                   | Homo sapiens |
| 301 | 11717282_at   | turquoise | ArfGAP with SH3 domain, ankyrin repeat and PH domain 1(ASAP1)                   | Homo sapiens |
| 302 | 11717293_x_at | turquoise | serine and arginine rich splicing factor 7(SRSF7)                               | Homo sapiens |
| 303 | 11717296_s_at | turquoise | leucine rich pentatricopeptide repeat containing(LRPPRC)                        | Homo sapiens |
| 305 | 11717299_at   | turquoise | major histocompatibility complex, class II, DP beta 1(HLA-DPB1)                 | Homo sapiens |
| 306 | 11717300_x_at | turquoise | major histocompatibility complex, class II, DP beta 1(HLA-DPB1)                 | Homo sapiens |
| 307 | 11717311_s_at | turquoise | F-box protein 7(FBXO7)                                                          | Homo sapiens |
| 308 | 11717317_at   | turquoise | glycerol-3-phosphate acyltransferase 4(GPAT4)                                   | Homo sapiens |
| 309 | 11717319_a_at | turquoise | SEC24 homolog D, COPII coat complex component(SEC24D)                           | Homo sapiens |
| 310 | 11717325_at   | turquoise | nudix hydrolase 16 like 1(NUDT16L1)                                             | Homo sapiens |
| 311 | 11717337_a_at | turquoise | integrin subunit beta 2(ITGB2)                                                  | Homo sapiens |
| 312 | 11717365_x_at | turquoise | syntrophin alpha 1(SNTA1)                                                       | Homo sapiens |

|     |               |           |                                                                       |              |
|-----|---------------|-----------|-----------------------------------------------------------------------|--------------|
| 313 | 11717366_at   | turquoise | zinc finger CCCH-type containing, antiviral 1(ZC3HAV1)                | Homo sapiens |
| 314 | 11717367_at   | turquoise | zinc finger CCCH-type containing, antiviral 1(ZC3HAV1)                | Homo sapiens |
| 315 | 11717368_x_at | turquoise | zinc finger CCCH-type containing, antiviral 1(ZC3HAV1)                | Homo sapiens |
| 316 | 11717371_a_at | turquoise | chromodomain helicase DNA binding protein 1 like(CHD1L)               | Homo sapiens |
| 317 | 11717375_a_at | turquoise | solute carrier family 25 member 25(SLC25A25)                          | Homo sapiens |
| 318 | 11717394_at   | turquoise | ariadne RBR E3 ubiquitin protein ligase 2(ARIH2)                      | Homo sapiens |
| 319 | 11717397_a_at | turquoise | damage specific DNA binding protein 2(DDB2)                           | Homo sapiens |
| 320 | 11717401_at   | turquoise | ADP ribosylation factor 6(ARF6)                                       | Homo sapiens |
| 321 | 11717402_s_at | turquoise | ADP ribosylation factor 6(ARF6)                                       | Homo sapiens |
| 323 | 11717409_at   | turquoise | SH2B adaptor protein 3(SH2B3)                                         | Homo sapiens |
| 324 | 11717418_at   | turquoise | dynein axonemal light chain 1(DNAL1)                                  | Homo sapiens |
| 325 | 11717423_s_at | turquoise | RNA binding motif protein 8A(RBM8A)                                   | Homo sapiens |
| 326 | 11717425_a_at | turquoise | RNF103-CHMP3 readthrough(RNF103-CHMP3)                                | Homo sapiens |
| 327 | 11717427_a_at | turquoise | G protein subunit beta 1(GNB1)                                        | Homo sapiens |
| 330 | 11717438_x_at | turquoise | topoisomerase (DNA) I(TOP1)                                           | Homo sapiens |
| 331 | 11717447_s_at | turquoise | destrin, actin depolymerizing factor(DSTN)                            | Homo sapiens |
| 332 | 11717453_at   | turquoise | SPARC/osteonectin, cwcv and kazal like domains proteoglycan 2(SPOCK2) | Homo sapiens |
| 333 | 11717454_at   | turquoise | SPARC/osteonectin, cwcv and kazal like domains proteoglycan 2(SPOCK2) | Homo sapiens |
| 334 | 11717464_at   | turquoise | latexin(LXN)                                                          | Homo sapiens |
| 335 | 11717465_s_at | turquoise | latexin(LXN)                                                          | Homo sapiens |
| 336 | 11717479_at   | turquoise | lysosomal associated membrane protein 2(LAMP2)                        | Homo sapiens |
| 337 | 11717482_at   | turquoise | pyruvate dehydrogenase (lipoamide) alpha 1(PDHA1)                     | Homo sapiens |
| 340 | 11717496_a_at | turquoise | inositol monophosphatase 2(IMPA2)                                     | Homo sapiens |
| 342 | 11717501_a_at | turquoise | hydroxyacylglutathione hydrolase(HAGH)                                | Homo sapiens |
| 343 | 11717502_a_at | turquoise | negative regulator of ubiquitin like proteins 1(NUB1)                 | Homo sapiens |
| 344 | 11717503_s_at | turquoise | negative regulator of ubiquitin like proteins 1(NUB1)                 | Homo sapiens |
| 345 | 11717507_at   | turquoise | translocation associated membrane protein 2(TRAM2)                    | Homo sapiens |
| 346 | 11717508_at   | turquoise | interferon regulatory factor 4(IRF4)                                  | Homo sapiens |
| 347 | 11717514_a_at | turquoise | annexin A1(ANXA1)                                                     | Homo sapiens |
| 348 | 11717517_s_at | turquoise | RNA exonuclease 2(REXO2)                                              | Homo sapiens |
| 349 | 11717521_x_at | turquoise | pituitary tumor-transforming 3, pseudogene(PTTG3P)                    | Homo sapiens |
| 350 | 11717528_a_at | turquoise | solute carrier family 25 member 20(SLC25A20)                          | Homo sapiens |
| 351 | 11717529_at   | turquoise | solute carrier family 25 member 20(SLC25A20)                          | Homo sapiens |
| 352 | 11717533_at   | turquoise | mannosidase alpha class 2A member 2(MAN2A2)                           | Homo sapiens |
| 353 | 11717542_a_at | turquoise | nuclear factor kappa B subunit 1(NFKB1)                               | Homo sapiens |
| 354 | 11717561_s_at | turquoise | deltex E3 ubiquitin ligase 3L(DTX3L)                                  | Homo sapiens |
| 355 | 11717562_x_at | turquoise | deltex E3 ubiquitin ligase 3L(DTX3L)                                  | Homo sapiens |
| 356 | 11717574_s_at | turquoise | profilin 1(PFN1)                                                      | Homo sapiens |
| 357 | 11717580_a_at | turquoise | CD52 molecule(CD52)                                                   | Homo sapiens |
| 358 | 11717581_s_at | turquoise | CD52 molecule(CD52)                                                   | Homo sapiens |
| 359 | 11717611_a_at | turquoise | microtubule associated serine/threonine kinase 2(MAST2)               | Homo sapiens |
| 361 | 11717636_s_at | turquoise | ras homolog family member G(RHOG)                                     | Homo sapiens |
| 362 | 11717637_x_at | turquoise | ras homolog family member G(RHOG)                                     | Homo sapiens |
| 365 | 11717657_a_at | turquoise | enhancer of zeste 2 polycomb repressive complex 2 subunit(EZH2)       | Homo sapiens |
| 366 | 11717661_a_at | turquoise | protein phosphatase 1 regulatory subunit 16B(PPP1R16B)                | Homo sapiens |
| 367 | 11717662_a_at | turquoise | piezo type mechanosensitive ion channel component 1(PIEZO1)           | Homo sapiens |
| 369 | 11717672_s_at | turquoise | ectonucleotide pyrophosphatase/phosphodiesterase 2(ENPP2)             | Homo sapiens |
| 370 | 11717679_a_at | turquoise | unc-13 homolog B(UNC13B)                                              | Homo sapiens |
| 371 | 11717681_at   | turquoise | G protein subunit alpha 13(GNA13)                                     | Homo sapiens |
| 372 | 11717688_a_at | turquoise | ring finger protein 19A, RBR E3 ubiquitin protein ligase(RNF19A)      | Homo sapiens |
| 373 | 11717691_a_at | turquoise | ankyrin repeat domain 13A(ANKRD13A)                                   | Homo sapiens |
| 374 | 11717708_s_at | turquoise | protein tyrosine phosphatase, non-receptor type 18(PTPN18)            | Homo sapiens |
| 375 | 11717714_at   | turquoise | carbohydrate sulfotransferase 10(CHST10)                              | Homo sapiens |
| 376 | 11717721_s_at | turquoise | ST6 beta-galactoside alpha-2,6-sialyltransferase 1(ST6GAL1)           | Homo sapiens |
| 377 | 11717726_s_at | turquoise | hematological and neurological expressed 1(HN1)                       | Homo sapiens |
| 378 | 11717727_s_at | turquoise | hematological and neurological expressed 1(HN1)                       | Homo sapiens |
| 379 | 11717730_s_at | turquoise | squalene epoxidase(SQLE)                                              | Homo sapiens |
| 380 | 11717732_s_at | turquoise | 6-phosphofructo-2-kinase/fructose-2,6-biphosphatase 3(PFKFB3)         | Homo sapiens |
| 381 | 11717737_at   | turquoise | prenylcysteine oxidase 1(PCYOX1)                                      | Homo sapiens |
| 382 | 11717738_at   | turquoise | prenylcysteine oxidase 1(PCYOX1)                                      | Homo sapiens |
| 383 | 11717739_at   | turquoise | prenylcysteine oxidase 1(PCYOX1)                                      | Homo sapiens |
| 384 | 11717743_a_at | turquoise | acyl-CoA thioesterase 7(ACOT7)                                        | Homo sapiens |
| 385 | 11717746_a_at | turquoise | membrane associated ring-CH-type finger 6(MARCH6)                     | Homo sapiens |
| 386 | 11717760_a_at | turquoise | glia maturation factor gamma(GMFG)                                    | Homo sapiens |
| 387 | 11717800_a_at | turquoise | activating transcription factor 5(ATF5)                               | Homo sapiens |
| 388 | 11717801_a_at | turquoise | activating transcription factor 5(ATF5)                               | Homo sapiens |
| 389 | 11717823_s_at | turquoise | TNF alpha induced protein 2(TNFAIP2)                                  | Homo sapiens |
| 390 | 11717836_a_at | turquoise | allograft inflammatory factor 1(AIF1)                                 | Homo sapiens |
| 391 | 11717837_x_at | turquoise | allograft inflammatory factor 1(AIF1)                                 | Homo sapiens |
| 392 | 11717839_a_at | turquoise | programmed cell death 6(PDCD6)                                        | Homo sapiens |
| 393 | 11717840_at   | turquoise | ethanolamine kinase 1(ETNK1)                                          | Homo sapiens |
| 394 | 11717841_at   | turquoise | ethanolamine kinase 1(ETNK1)                                          | Homo sapiens |
| 395 | 11717858_a_at | turquoise | CD37 molecule(CD37)                                                   | Homo sapiens |
| 397 | 11717865_at   | turquoise | proteasome activator subunit 4(PSME4)                                 | Homo sapiens |
| 398 | 11717872_a_at | turquoise | interferon regulatory factor 8(IRF8)                                  | Homo sapiens |
| 399 | 11717873_x_at | turquoise | interferon regulatory factor 8(IRF8)                                  | Homo sapiens |
| 400 | 11717874_a_at | turquoise | interferon regulatory factor 8(IRF8)                                  | Homo sapiens |
| 401 | 11717883_x_at | turquoise | zinc fingers and homeoboxes 3(ZHX3)                                   | Homo sapiens |
| 402 | 11717884_a_at | turquoise | zinc fingers and homeoboxes 3(ZHX3)                                   | Homo sapiens |
| 403 | 11717886_a_at | turquoise | plasminogen activator, urokinase(PLAU)                                | Homo sapiens |
| 404 | 11717887_s_at | turquoise | protein tyrosine phosphatase, non-receptor type 12(PTPN12)            | Homo sapiens |
| 405 | 11717889_s_at | turquoise | G protein subunit alpha i2(GNAI2)                                     | Homo sapiens |

|     |               |           |                                                                             |              |
|-----|---------------|-----------|-----------------------------------------------------------------------------|--------------|
| 406 | 11717931_at   | turquoise | TANK binding kinase 1(TBK1)                                                 | Homo sapiens |
| 408 | 11717939_a_at | turquoise | U2 small nuclear RNA auxiliary factor 2(U2AF2)                              | Homo sapiens |
| 409 | 11717959_a_at | turquoise | transcription factor 3(TCF3)                                                | Homo sapiens |
| 410 | 11717965_s_at | turquoise | KRAS proto-oncogene, GTPase(KRAS)                                           | Homo sapiens |
| 411 | 11717972_a_at | turquoise | family with sequence similarity 219 member B(FAM219B)                       | Homo sapiens |
| 412 | 11717973_x_at | turquoise | family with sequence similarity 219 member B(FAM219B)                       | Homo sapiens |
| 413 | 11717974_x_at | turquoise | family with sequence similarity 219 member B(FAM219B)                       | Homo sapiens |
| 414 | 11717981_a_at | turquoise | acid phosphatase 5, tartrate resistant(ACPS5)                               | Homo sapiens |
| 415 | 11717988_s_at | turquoise | RNASEK-C17orf49 readthrough(RNASEK-C17orf49)                                | Homo sapiens |
| 416 | 11718001_a_at | turquoise | chromosome 10 open reading frame 54(C10orf54)                               | Homo sapiens |
| 417 | 11718002_at   | turquoise | chromosome 10 open reading frame 54(C10orf54)                               | Homo sapiens |
| 418 | 11718005_a_at | turquoise | cell division cycle 25B(CDC25B)                                             | Homo sapiens |
| 419 | 11718008_a_at | turquoise | copine 2(CPNE2)                                                             | Homo sapiens |
| 420 | 11718010_at   | turquoise | solute carrier family 25 member 22(SLC25A22)                                | Homo sapiens |
| 421 | 11718011_a_at | turquoise | mitochondrial ribosomal protein L4(MRPL4)                                   | Homo sapiens |
| 422 | 11718020_a_at | turquoise | leucine rich repeat containing 20(LRRC20)                                   | Homo sapiens |
| 423 | 11718026_a_at | turquoise | nuclear receptor coactivator 7(NCOA7)                                       | Homo sapiens |
| 424 | 11718027_a_at | turquoise | pseudouridylyl synthase 1(PUS1)                                             | Homo sapiens |
| 425 | 11718028_x_at | turquoise | pseudouridylyl synthase 1(PUS1)                                             | Homo sapiens |
| 428 | 11718037_x_at | turquoise | midkine (neurite growth-promoting factor 2)(MDK)                            | Homo sapiens |
| 429 | 11718050_a_at | turquoise | brain abundant membrane attached signal protein 1(BASP1)                    | Homo sapiens |
| 430 | 11718058_a_at | turquoise | thymidylate synthetase(TYMS)                                                | Homo sapiens |
| 431 | 11718060_a_at | turquoise | tweety family member 2(TTYH2)                                               | Homo sapiens |
| 432 | 11718064_a_at | turquoise | S100 calcium binding protein A4(S100A4)                                     | Homo sapiens |
| 433 | 11718065_a_at | turquoise | nectin cell adhesion molecule 2(NECTIN2)                                    | Homo sapiens |
| 434 | 11718068_at   | turquoise | myosin IE(MYO1E)                                                            | Homo sapiens |
| 435 | 11718073_at   | turquoise | interleukin 4 receptor(IL4R)                                                | Homo sapiens |
| 436 | 11718075_at   | turquoise | interleukin 4 receptor(IL4R)                                                | Homo sapiens |
| 438 | 11718084_a_at | turquoise | LYN proto-oncogene, Src family tyrosine kinase(LYN)                         | Homo sapiens |
| 439 | 11718085_s_at | turquoise | LYN proto-oncogene, Src family tyrosine kinase(LYN)                         | Homo sapiens |
| 440 | 11718086_s_at | turquoise | SH3KBP1 binding protein 1(SHKBP1)                                           | Homo sapiens |
| 441 | 11718099_a_at | turquoise | intraflagellar transport 20(IFT20)                                          | Homo sapiens |
| 443 | 11718121_x_at | turquoise | ATPase H+ transporting V1 subunit A(ATP6V1A)                                | Homo sapiens |
| 444 | 11718134_a_at | turquoise | phosphoribosyl pyrophosphate synthetase 2(PRPS2)                            | Homo sapiens |
| 445 | 11718135_at   | turquoise | phosphoribosyl pyrophosphate synthetase 2(PRPS2)                            | Homo sapiens |
| 446 | 11718140_a_at | turquoise | epithelial membrane protein 3(EMP3)                                         | Homo sapiens |
| 448 | 11718152_a_at | turquoise | PPFIA binding protein 2(PPFIBP2)                                            | Homo sapiens |
| 449 | 11718158_a_at | turquoise | N-myc and STAT interactor(NMI)                                              | Homo sapiens |
| 450 | 11718159_at   | turquoise | N-myc and STAT interactor(NMI)                                              | Homo sapiens |
| 451 | 11718184_a_at | turquoise | FCH and double SH3 domains 2(FCHSD2)                                        | Homo sapiens |
| 452 | 11718186_a_at | turquoise | ubiquitin like with PHD and ring finger domains 2(UHRF2)                    | Homo sapiens |
| 453 | 11718204_a_at | turquoise | REC8 meiotic recombination protein(REC8)                                    | Homo sapiens |
| 456 | 11718230_a_at | turquoise | major histocompatibility complex, class I, F(HLA-F)                         | Homo sapiens |
| 457 | 11718231_x_at | turquoise | major histocompatibility complex, class I, F(HLA-F)                         | Homo sapiens |
| 459 | 11718245_at   | turquoise | solute carrier family 25 member 42(SLC25A42)                                | Homo sapiens |
| 460 | 11718265_a_at | turquoise | SMAD family member 3(SMAD3)                                                 | Homo sapiens |
| 461 | 11718266_s_at | turquoise | SMAD family member 3(SMAD3)                                                 | Homo sapiens |
| 465 | 11718290_a_at | turquoise | FXD domain containing ion transport regulator 5(FXD5)                       | Homo sapiens |
| 466 | 11718293_a_at | turquoise | cyclin dependent kinase inhibitor 2A(CDKN2A)                                | Homo sapiens |
| 467 | 11718297_a_at | turquoise | transforming acidic coiled-coil containing protein 3(TACC3)                 | Homo sapiens |
| 468 | 11718303_a_at | turquoise | platelet activating factor acetylhydrolase 1b catalytic subunit 3(PAFAH1B3) | Homo sapiens |
| 470 | 11718319_at   | turquoise | CD93 molecule(CD93)                                                         | Homo sapiens |
| 471 | 11718322_at   | turquoise | ArfGAP with coiled-coil, ankyrin repeat and PH domains 2(ACAP2)             | Homo sapiens |
| 472 | 11718325_at   | turquoise | sestrin 2(SESN2)                                                            | Homo sapiens |
| 473 | 11718340_x_at | turquoise | DAZ associated protein 2(DAZAP2)                                            | Homo sapiens |
| 474 | 11718370_a_at | turquoise | nuclear receptor binding factor 2(NRBF2)                                    | Homo sapiens |
| 475 | 11718381_a_at | turquoise | pleckstrin and Sec7 domain containing 4(PSD4)                               | Homo sapiens |
| 476 | 11718382_x_at | turquoise | poly(ADP-ribose) polymerase family member 4(PARP4)                          | Homo sapiens |
| 478 | 11718400_a_at | turquoise | purine nucleoside phosphorylase(PNP)                                        | Homo sapiens |
| 479 | 11718415_x_at | turquoise | non-POU domain containing, octamer-binding(NONO)                            | Homo sapiens |
| 480 | 11718417_a_at | turquoise | ECSIT signalling integrator(ECSIT)                                          | Homo sapiens |
| 481 | 11718418_a_at | turquoise | thiosulfate sulfurtransferase(TST)                                          | Homo sapiens |
| 482 | 11718419_at   | turquoise | Fc fragment of IgE receptor Ig(FcER1G)                                      | Homo sapiens |
| 483 | 11718420_a_at | turquoise | CLPTM1 like(CLPTM1L)                                                        | Homo sapiens |
| 484 | 11718425_a_at | turquoise | hydroxysteroid dehydrogenase like 2(HSDL2)                                  | Homo sapiens |
| 487 | 11718436_a_at | turquoise | ATP synthase mitochondrial F1 complex assembly factor 2(ATPAF2)             | Homo sapiens |
| 488 | 11718450_at   | turquoise | alpha-N-acetylgalactosaminidase(NAGA)                                       | Homo sapiens |
| 489 | 11718461_at   | turquoise | solute carrier family 39 member 11(SLC39A11)                                | Homo sapiens |
| 490 | 11718468_s_at | turquoise | N-terminal EF-hand calcium binding protein 3(NECAB3)                        | Homo sapiens |
| 491 | 11718512_x_at | turquoise | tetraspanin 14(TSPAN14)                                                     | Homo sapiens |
| 492 | 11718513_x_at | turquoise | tetraspanin 14(TSPAN14)                                                     | Homo sapiens |
| 493 | 11718514_s_at | turquoise | tetraspanin 14(TSPAN14)                                                     | Homo sapiens |
| 494 | 11718515_a_at | turquoise | sulfide quinone reductase-like (yeast)(SQRD1)                               | Homo sapiens |
| 495 | 11718520_at   | turquoise | potassium channel modulatory factor 1(KCMF1)                                | Homo sapiens |
| 496 | 11718525_s_at | turquoise | non imprinted in Prader-Willi/Angelman syndrome 2(NIPA2)                    | Homo sapiens |
| 497 | 11718528_a_at | turquoise | torsin family 3 member A(TOR3A)                                             | Homo sapiens |
| 498 | 11718534_at   | turquoise | natural killer cell triggering receptor(NKTR)                               | Homo sapiens |
| 499 | 11718537_s_at | turquoise | fumarylacetoacetate hydrolase domain containing 2B(FAHD2B)                  | Homo sapiens |
| 500 | 11718538_x_at | turquoise | fumarylacetoacetate hydrolase domain containing 2A(FAHD2A)                  | Homo sapiens |
| 501 | 11718540_at   | turquoise | transmembrane protein 243(TMEM243)                                          | Homo sapiens |
| 502 | 11718546_s_at | turquoise | interleukin enhancer binding factor 3(ILF3)                                 | Homo sapiens |
| 503 | 11718559_at   | turquoise | nucleolar protein 4 like(NOL4L)                                             | Homo sapiens |

|     |               |           |                                                                               |              |
|-----|---------------|-----------|-------------------------------------------------------------------------------|--------------|
| 504 | 11718563_a_at | turquoise | ankyrin repeat domain 10(ANKRD10)                                             | Homo sapiens |
| 505 | 11718568_a_at | turquoise | WAS/WASL interacting protein family member 1(WIPF1)                           | Homo sapiens |
| 506 | 11718569_a_at | turquoise | WAS/WASL interacting protein family member 1(WIPF1)                           | Homo sapiens |
| 508 | 11718591_at   | turquoise | stromal cell derived factor 2 like 1(SDF2L1)                                  | Homo sapiens |
| 509 | 11718592_s_at | turquoise | reticulon 4(RTN4)                                                             | Homo sapiens |
| 510 | 11718594_a_at | turquoise | cyclin L1(CCNL1)                                                              | Homo sapiens |
| 511 | 11718608_at   | turquoise | microRNA 5193(MIR5193)                                                        | Homo sapiens |
| 512 | 11718610_a_at | turquoise | tumor protein p53 inducible nuclear protein 1(TP53INP1)                       | Homo sapiens |
| 513 | 11718621_at   | turquoise | dual specificity phosphatase 12(DUSP12)                                       | Homo sapiens |
| 514 | 11718625_a_at | turquoise | deoxyguanosine kinase(DGUOK)                                                  | Homo sapiens |
| 515 | 11718631_a_at | turquoise | SERTA domain containing 1(SERTAD1)                                            | Homo sapiens |
| 516 | 11718641_a_at | turquoise | N-deacetylase and N-sulfotransferase 2(NDST2)                                 | Homo sapiens |
| 517 | 11718652_a_at | turquoise | signal transducer and activator of transcription 2(STAT2)                     | Homo sapiens |
| 518 | 11718655_s_at | turquoise | charged multivesicular body protein 5(CHMP5)                                  | Homo sapiens |
| 519 | 11718657_a_at | turquoise | microRNA 21(MIR21)                                                            | Homo sapiens |
| 520 | 11718659_x_at | turquoise | Mov10 RISC complex RNA helicase(MOV10)                                        | Homo sapiens |
| 521 | 11718665_s_at | turquoise | glutamyl-tRNA amidotransferase subunit C(GATC)                                | Homo sapiens |
| 522 | 11718666_x_at | turquoise | glutamyl-tRNA amidotransferase subunit C(GATC)                                | Homo sapiens |
| 524 | 11718670_at   | turquoise | mediator complex subunit 9(MED9)                                              | Homo sapiens |
| 525 | 11718672_x_at | turquoise | interferon regulatory factor 3(IRF3)                                          | Homo sapiens |
| 526 | 11718674_a_at | turquoise | transmembrane protein 245(TMEM245)                                            | Homo sapiens |
| 527 | 11718678_a_at | turquoise | presenilin 1(PSEN1)                                                           | Homo sapiens |
| 528 | 11718680_a_at | turquoise | adhesion G protein-coupled receptor E5(ADGRE5)                                | Homo sapiens |
| 529 | 11718699_at   | turquoise | chromosome 6 open reading frame 89(C6orf89)                                   | Homo sapiens |
| 530 | 11718757_s_at | turquoise | hypoxia inducible factor 1 alpha subunit(HIF1A)                               | Homo sapiens |
| 533 | 11718766_at   | turquoise | protease, serine 23(PRSS23)                                                   | Homo sapiens |
| 534 | 11718767_x_at | turquoise | protease, serine 23(PRSS23)                                                   | Homo sapiens |
| 535 | 11718788_a_at | turquoise | adenosine deaminase(ADA)                                                      | Homo sapiens |
| 536 | 11718807_at   | turquoise | TNF receptor superfamily member 1B(TNFRSF1B)                                  | Homo sapiens |
| 537 | 11718809_a_at | turquoise | protein kinase C eta(PRKCH)                                                   | Homo sapiens |
| 538 | 11718810_a_at | turquoise | protein kinase C eta(PRKCH)                                                   | Homo sapiens |
| 539 | 11718811_s_at | turquoise | protein kinase C eta(PRKCH)                                                   | Homo sapiens |
| 540 | 11718830_s_at | turquoise | EH domain containing 1(EHD1)                                                  | Homo sapiens |
| 542 | 11718832_a_at | turquoise | lysyl oxidase like 2(LOXL2)                                                   | Homo sapiens |
| 544 | 11718849_at   | turquoise | protein tyrosine phosphatase, receptor type C associated protein(PTPRCAP)     | Homo sapiens |
| 546 | 11718860_a_at | turquoise | Suv3 like RNA helicase(SUPV3L1)                                               | Homo sapiens |
| 547 | 11718861_a_at | turquoise | HCK proto-oncogene, Src family tyrosine kinase(HCK)                           | Homo sapiens |
| 548 | 11718865_at   | turquoise | COX10, heme A:farnesyltransferase cytochrome c oxidase assembly factor(COX10) | Homo sapiens |
| 549 | 11718904_s_at | turquoise | filamin A interacting protein 1 like(FILIP1L)                                 | Homo sapiens |
| 550 | 11718908_s_at | turquoise | carbohydrate sulfotransferase 2(CHST2)                                        | Homo sapiens |
| 551 | 11718909_x_at | turquoise | carbohydrate sulfotransferase 2(CHST2)                                        | Homo sapiens |
| 552 | 11718912_a_at | turquoise | PDZ domain containing 2(PDZD2)                                                | Homo sapiens |
| 553 | 11718914_x_at | turquoise | PDZ domain containing 2(PDZD2)                                                | Homo sapiens |
| 554 | 11718915_a_at | turquoise | regulator of G-protein signaling 19(RGS19)                                    | Homo sapiens |
| 555 | 11718916_a_at | turquoise | interferon regulatory factor 7(IRF7)                                          | Homo sapiens |
| 556 | 11718924_a_at | turquoise | WW domain containing E3 ubiquitin protein ligase 2(WWP2)                      | Homo sapiens |
| 557 | 11718929_a_at | turquoise | TGF-beta induced factor homeobox 2(TGIF2)                                     | Homo sapiens |
| 558 | 11718930_a_at | turquoise | TGF-beta induced factor homeobox 2(TGIF2)                                     | Homo sapiens |
| 559 | 11718935_x_at | turquoise | serine/threonine kinase 19(STK19)                                             | Homo sapiens |
| 560 | 11718939_s_at | turquoise | TNF alpha induced protein 3(TNFAIP3)                                          | Homo sapiens |
| 561 | 11718940_a_at | turquoise | TNF alpha induced protein 3(TNFAIP3)                                          | Homo sapiens |
| 563 | 11718950_s_at | turquoise | membrane palmitoylated protein 5(MPP5)                                        | Homo sapiens |
| 564 | 11718954_a_at | turquoise | filamin binding LIM protein 1(FBLIM1)                                         | Homo sapiens |
| 565 | 11718958_s_at | turquoise | protein kinase AMP-activated non-catalytic subunit beta 2(PRKAB2)             | Homo sapiens |
| 566 | 11718981_a_at | turquoise | transgelin 2(TAGLN2)                                                          | Homo sapiens |
| 567 | 11718982_s_at | turquoise | C-C motif chemokine ligand 4 like 1(CCL4L1)                                   | Homo sapiens |
| 568 | 11718983_x_at | turquoise | C-C motif chemokine ligand 4 like 1(CCL4L1)                                   | Homo sapiens |
| 569 | 11718986_a_at | turquoise | interferon alpha inducible protein 6(IFI6)                                    | Homo sapiens |
| 571 | 11718996_at   | turquoise | methionine sulfoxide reductase B2(MSRB2)                                      | Homo sapiens |
| 572 | 11719016_at   | turquoise | PQ loop repeat containing 3(PQLC3)                                            | Homo sapiens |
| 573 | 11719020_at   | turquoise | WD repeat and FYVE domain containing 1(WDFY1)                                 | Homo sapiens |
| 574 | 11719021_at   | turquoise | WD repeat and FYVE domain containing 1(WDFY1)                                 | Homo sapiens |
| 575 | 11719029_s_at | turquoise | phosphoinositide-3-kinase adaptor protein 1(PIK3AP1)                          | Homo sapiens |
| 576 | 11719038_a_at | turquoise | ArfGAP with RhoGAP domain, ankyrin repeat and PH domain 1(ARAP1)              | Homo sapiens |
| 577 | 11719046_a_at | turquoise | SNF related kinase(SNRK)                                                      | Homo sapiens |
| 578 | 11719050_a_at | turquoise | butyrophilin subfamily 2 member A1(BTN2A1)                                    | Homo sapiens |
| 580 | 11719076_a_at | turquoise | receptor accessory protein 1(REEP1)                                           | Homo sapiens |
| 581 | 11719083_x_at | turquoise | TruB pseudouridine synthase family member 2(TRUB2)                            | Homo sapiens |
| 582 | 11719089_a_at | turquoise | phosphoenolpyruvate carboxykinase 2, mitochondrial(PCK2)                      | Homo sapiens |
| 587 | 11719120_a_at | turquoise | kynureninase(KYNU)                                                            | Homo sapiens |
| 588 | 11719123_a_at | turquoise | timeless circadian clock(TIMELESS)                                            | Homo sapiens |
| 589 | 11719126_a_at | turquoise | cell growth regulator with ring finger domain 1(CGRRF1)                       | Homo sapiens |
| 590 | 11719128_a_at | turquoise | lipase maturation factor 2(LMF2)                                              | Homo sapiens |
| 591 | 11719132_s_at | turquoise | family with sequence similarity 49 member B(FAM49B)                           | Homo sapiens |
| 592 | 11719154_a_at | turquoise | DNA damage regulated autophagy modulator 1(DRAM1)                             | Homo sapiens |
| 593 | 11719155_a_at | turquoise | DNA damage regulated autophagy modulator 1(DRAM1)                             | Homo sapiens |
| 594 | 11719164_a_at | turquoise | chloride voltage-gated channel 5(CLCN5)                                       | Homo sapiens |
| 595 | 11719182_a_at | turquoise | chloride voltage-gated channel 7(CLCN7)                                       | Homo sapiens |
| 596 | 11719188_at   | turquoise | neuroblastoma RAS viral oncogene homolog(NRAS)                                | Homo sapiens |
| 597 | 11719189_at   | turquoise | neuroblastoma RAS viral oncogene homolog(NRAS)                                | Homo sapiens |
| 598 | 11719193_a_at | turquoise | chibby family member 1, beta catenin antagonist(CBY1)                         | Homo sapiens |
| 599 | 11719211_a_at | turquoise | heat shock transcription factor 2(HSF2)                                       | Homo sapiens |

|     |               |           |                                                                                   |              |
|-----|---------------|-----------|-----------------------------------------------------------------------------------|--------------|
| 600 | 11719216_a_at | turquoise | tudor domain containing 7(TDRD7)                                                  | Homo sapiens |
| 601 | 11719218_at   | turquoise | suppressor of cytokine signaling 3(SOCS3)                                         | Homo sapiens |
| 603 | 11719227_x_at | turquoise | potassium calcium-activated channel subfamily N member 4(KCNN4)                   | Homo sapiens |
| 605 | 11719245_a_at | turquoise | LARGE xylosyl- and glucuronyltransferase 1(LARGE1)                                | Homo sapiens |
| 606 | 11719247_a_at | turquoise | absent in melanoma 1(AIM1)                                                        | Homo sapiens |
| 607 | 11719248_a_at | turquoise | absent in melanoma 1(AIM1)                                                        | Homo sapiens |
| 608 | 11719258_at   | turquoise | toll like receptor adaptor molecule 1(TICAM1)                                     | Homo sapiens |
| 609 | 11719270_s_at | turquoise | RNA binding motif protein 22(RBM22)                                               | Homo sapiens |
| 610 | 11719271_s_at | turquoise | glucuronidase beta(GUSB)                                                          | Homo sapiens |
| 612 | 11719305_at   | turquoise | synaptopodin(SYNPO)                                                               | Homo sapiens |
| 613 | 11719313_a_at | turquoise | family with sequence similarity 111 member A(FAM111A)                             | Homo sapiens |
| 614 | 11719327_a_at | turquoise | cysteine rich with EGF like domains 2(CRELD2)                                     | Homo sapiens |
| 615 | 11719332_at   | turquoise | uncharacterized LOC101928361(LOC101928361)                                        | Homo sapiens |
| 616 | 11719347_a_at | turquoise | Rho GTPase activating protein 19(ARHGAP19)                                        | Homo sapiens |
| 617 | 11719354_s_at | turquoise | SH3 domain binding protein 5(SH3BP5)                                              | Homo sapiens |
| 618 | 11719355_s_at | turquoise | SH3 domain binding protein 5(SH3BP5)                                              | Homo sapiens |
| 620 | 11719366_s_at | turquoise | C-X-C motif chemokine ligand 1(CXCL1)                                             | Homo sapiens |
| 621 | 11719367_a_at | turquoise | pleckstrin homology domain containing O2(PLEKHO2)                                 | Homo sapiens |
| 622 | 11719372_s_at | turquoise | brain expressed X-linked 3(BEX3)                                                  | Homo sapiens |
| 623 | 11719377_x_at | turquoise | adenylate cyclase associated protein 1(CAP1)                                      | Homo sapiens |
| 624 | 11719378_a_at | turquoise | Rap1 GTPase-GDP dissociation stimulator 1(RAP1GDS1)                               | Homo sapiens |
| 625 | 11719379_a_at | turquoise | Rap1 GTPase-GDP dissociation stimulator 1(RAP1GDS1)                               | Homo sapiens |
| 626 | 11719398_s_at | turquoise | Ras related GTP binding C(RRAGC)                                                  | Homo sapiens |
| 627 | 11719402_a_at | turquoise | RAP2A, member of RAS oncogene family(RAP2A)                                       | Homo sapiens |
| 628 | 11719411_at   | turquoise | RAB32, member RAS oncogene family(RAB32)                                          | Homo sapiens |
| 629 | 11719413_a_at | turquoise | PBX homeobox 1(PBX1)                                                              | Homo sapiens |
| 632 | 11719435_a_at | turquoise | LDL receptor related protein 4(LRP4)                                              | Homo sapiens |
| 633 | 11719438_at   | turquoise | SLIT-ROBO Rho GTPase activating protein 2(SRGA2)                                  | Homo sapiens |
| 634 | 11719447_s_at | turquoise | guanylate binding protein 2(GBP2)                                                 | Homo sapiens |
| 635 | 11719465_a_at | turquoise | complement C1q B chain(C1QB)                                                      | Homo sapiens |
| 636 | 11719466_s_at | turquoise | complement C1q B chain(C1QB)                                                      | Homo sapiens |
| 637 | 11719479_at   | turquoise | arachidonate 5-lipoxygenase activating protein(ALOX5AP)                           | Homo sapiens |
| 638 | 11719480_a_at | turquoise | cystatin A(CSTA)                                                                  | Homo sapiens |
| 640 | 11719483_a_at | turquoise | purinergic receptor P2X 4(P2RX4)                                                  | Homo sapiens |
| 641 | 11719491_a_at | turquoise | interferon induced protein 35(IFI35)                                              | Homo sapiens |
| 642 | 11719492_s_at | turquoise | interferon induced protein 35(IFI35)                                              | Homo sapiens |
| 643 | 11719499_at   | turquoise | monoamine oxidase B(MAOB)                                                         | Homo sapiens |
| 644 | 11719501_a_at | turquoise | nuclear factor of activated T-cells 3(NFATC3)                                     | Homo sapiens |
| 645 | 11719513_a_at | turquoise | ADAM metallopeptidase domain 15(ADAM15)                                           | Homo sapiens |
| 646 | 11719528_at   | turquoise | nectin cell adhesion molecule 2(NECTIN2)                                          | Homo sapiens |
| 647 | 11719539_a_at | turquoise | nuclear envelope integral membrane protein 1(NEMP1)                               | Homo sapiens |
| 648 | 11719543_a_at | turquoise | chromosome 3 open reading frame 18(C3orf18)                                       | Homo sapiens |
| 649 | 11719554_at   | turquoise | cathepsin S(CTSS)                                                                 | Homo sapiens |
| 650 | 11719556_a_at | turquoise | pyruvate dehydrogenase kinase 2(PDK2)                                             | Homo sapiens |
| 652 | 11719579_a_at | turquoise | translational activator of cytochrome c oxidase I(TACO1)                          | Homo sapiens |
| 653 | 11719587_a_at | turquoise | MICAL like 1(MICAL1)                                                              | Homo sapiens |
| 654 | 11719588_a_at | turquoise | 2'-5'-oligoadenylate synthetase 1(OAS1)                                           | Homo sapiens |
| 655 | 11719591_s_at | turquoise | glycolipid transfer protein(GLTP)                                                 | Homo sapiens |
| 656 | 11719599_a_at | turquoise | homer scaffolding protein 2(HOMER2)                                               | Homo sapiens |
| 657 | 11719629_a_at | turquoise | bromodomain containing 2(BRD2)                                                    | Homo sapiens |
| 658 | 11719630_a_at | turquoise | bromodomain containing 2(BRD2)                                                    | Homo sapiens |
| 659 | 11719631_s_at | turquoise | bridging integrator 1(BIN1)                                                       | Homo sapiens |
| 660 | 11719644_a_at | turquoise | GATA zinc finger domain containing 2A(GATAD2A)                                    | Homo sapiens |
| 661 | 11719648_a_at | turquoise | caspase 7(CASP7)                                                                  | Homo sapiens |
| 662 | 11719657_a_at | turquoise | matrix metallopeptidase 9(MMP9)                                                   | Homo sapiens |
| 663 | 11719675_a_at | turquoise | vascular cell adhesion molecule 1(VCAM1)                                          | Homo sapiens |
| 664 | 11719676_s_at | turquoise | monoamine oxidase A(MAOA)                                                         | Homo sapiens |
| 665 | 11719680_x_at | turquoise | TNF receptor superfamily member 10b(TNFRSF10B)                                    | Homo sapiens |
| 666 | 11719686_a_at | turquoise | microtubule associated monoxygenase, calponin and LIM domain containing 1(MICAL1) | Homo sapiens |
| 667 | 11719687_at   | turquoise | SET domain bifurcated 1(SETDB1)                                                   | Homo sapiens |
| 668 | 11719692_a_at | turquoise | retinoic acid receptor responder 3(RARRES3)                                       | Homo sapiens |
| 669 | 11719718_a_at | turquoise | spleen associated tyrosine kinase(SYK)                                            | Homo sapiens |
| 670 | 11719728_s_at | turquoise | signal regulatory protein alpha(SIRPA)                                            | Homo sapiens |
| 671 | 11719738_at   | turquoise | decapping mRNA 2(DCP2)                                                            | Homo sapiens |
| 672 | 11719739_s_at | turquoise | decapping mRNA 2(DCP2)                                                            | Homo sapiens |
| 673 | 11719745_s_at | turquoise | Rho GTPase activating protein 27(ARHGAP27)                                        | Homo sapiens |
| 674 | 11719749_a_at | turquoise | emopamil binding protein like(EBPL)                                               | Homo sapiens |
| 675 | 11719754_s_at | turquoise | interleukin 1 receptor antagonist(IL1RN)                                          | Homo sapiens |
| 676 | 11719763_a_at | turquoise | vacuolar protein sorting 13 homolog C(VPS13C)                                     | Homo sapiens |
| 677 | 11719780_at   | turquoise | TNF alpha induced protein 8 like 2(TNFAIP8L2)                                     | Homo sapiens |
| 678 | 11719800_at   | turquoise | chromosome 6 open reading frame 62(C6orf62)                                       | Homo sapiens |
| 679 | 11719801_a_at | turquoise | chromosome 6 open reading frame 62(C6orf62)                                       | Homo sapiens |
| 680 | 11719827_a_at | turquoise | glutaminyl-peptide cyclotransferase(QPCT)                                         | Homo sapiens |
| 681 | 11719828_x_at | turquoise | glutaminyl-peptide cyclotransferase(QPCT)                                         | Homo sapiens |
| 683 | 11719833_at   | turquoise | myelin protein zero like 2(MPZL2)                                                 | Homo sapiens |
| 684 | 11719838_a_at | turquoise | caspase 3(CASP3)                                                                  | Homo sapiens |
| 685 | 11719844_at   | turquoise | small ArfGAP2(SMAP2)                                                              | Homo sapiens |
| 686 | 11719845_a_at | turquoise | small ArfGAP2(SMAP2)                                                              | Homo sapiens |
| 687 | 11719861_x_at | turquoise | SLC2A4 regulator(SLC2A4RG)                                                        | Homo sapiens |
| 688 | 11719864_a_at | turquoise | small cell adhesion glycoprotein(SMAGP)                                           | Homo sapiens |
| 689 | 11719868_a_at | turquoise | v-myc avian myelocytomatosis viral oncogene neuroblastoma derived homolog(MYCN)   | Homo sapiens |
| 690 | 11719869_a_at | turquoise | v-myc avian myelocytomatosis viral oncogene neuroblastoma derived homolog(MYCN)   | Homo sapiens |

|     |               |           |                                                                                 |              |
|-----|---------------|-----------|---------------------------------------------------------------------------------|--------------|
| 691 | 11719870_s_at | turquoise | v-myc avian myelocytomatosis viral oncogene neuroblastoma derived homolog(MYCN) | Homo sapiens |
| 694 | 11719886_a_at | turquoise | interferon induced protein 44(IFI44)                                            | Homo sapiens |
| 695 | 11719887_a_at | turquoise | GRB10 interacting GYF protein 2(GIGYF2)                                         | Homo sapiens |
| 696 | 11719892_at   | turquoise | vasohibin 1(VASH1)                                                              | Homo sapiens |
| 697 | 11719894_s_at | turquoise | family with sequence similarity 91 member A1(FAM91A1)                           | Homo sapiens |
| 698 | 11719895_x_at | turquoise | family with sequence similarity 91 member A1(FAM91A1)                           | Homo sapiens |
| 699 | 11719897_x_at | turquoise | family with sequence similarity 91 member A1(FAM91A1)                           | Homo sapiens |
| 700 | 11719902_a_at | turquoise | PHD finger protein 11(PHF11)                                                    | Homo sapiens |
| 701 | 11719910_a_at | turquoise | phosphatidylinositol binding clathrin assembly protein(PICALM)                  | Homo sapiens |
| 702 | 11719916_at   | turquoise | interleukin 1 beta(IL1B)                                                        | Homo sapiens |
| 703 | 11719938_s_at | turquoise | cullin associated and neddylation dissociated 1(CAND1)                          | Homo sapiens |
| 704 | 11719939_a_at | turquoise | cullin associated and neddylation dissociated 1(CAND1)                          | Homo sapiens |
| 705 | 11719943_at   | turquoise | C-X-C motif chemokine ligand 9(CXCL9)                                           | Homo sapiens |
| 706 | 11719953_s_at | turquoise | FK506 binding protein 15(FKBP15)                                                | Homo sapiens |
| 707 | 11719972_at   | turquoise | SCO2, cytochrome c oxidase assembly protein(SCO2)                               | Homo sapiens |
| 708 | 11719973_a_at | turquoise | A-kinase anchoring protein 17A(AKAP17A)                                         | Homo sapiens |
| 709 | 11719976_at   | turquoise | WAS protein family member 3(WASF3)                                              | Homo sapiens |
| 710 | 11719980_a_at | turquoise | formin like 2(FMNL2)                                                            | Homo sapiens |
| 711 | 11719995_a_at | turquoise | transducin like enhancer of split 4(TLE4)                                       | Homo sapiens |
| 712 | 11719996_at   | turquoise | transducin like enhancer of split 4(TLE4)                                       | Homo sapiens |
| 713 | 11720014_a_at | turquoise | ATM serine/threonine kinase(ATM)                                                | Homo sapiens |
| 714 | 11720029_a_at | turquoise | low density lipoprotein receptor(LDLR)                                          | Homo sapiens |
| 715 | 11720034_x_at | turquoise | caspase 2(CASP2)                                                                | Homo sapiens |
| 716 | 11720035_s_at | turquoise | caspase 2(CASP2)                                                                | Homo sapiens |
| 717 | 11720043_a_at | turquoise | abhydrolase domain containing 16A(ABHD16A)                                      | Homo sapiens |
| 718 | 11720044_at   | turquoise | src kinase associated phosphoprotein 2(SKAP2)                                   | Homo sapiens |
| 719 | 11720063_a_at | turquoise | GLI pathogenesis related 2(GLIPR2)                                              | Homo sapiens |
| 720 | 11720064_a_at | turquoise | GLI pathogenesis related 2(GLIPR2)                                              | Homo sapiens |
| 721 | 11720096_a_at | turquoise | LIM domain containing 2(LIMD2)                                                  | Homo sapiens |
| 722 | 11720098_a_at | turquoise | centrosomal protein 70(CEP70)                                                   | Homo sapiens |
| 723 | 11720103_a_at | turquoise | p21 (RAC1) activated kinase 1(PAK1)                                             | Homo sapiens |
| 724 | 11720104_a_at | turquoise | p21 (RAC1) activated kinase 1(PAK1)                                             | Homo sapiens |
| 725 | 11720107_s_at | turquoise | kinesin family member 2A(KIF2A)                                                 | Homo sapiens |
| 726 | 11720111_at   | turquoise | syntrophin beta 2(SNTB2)                                                        | Homo sapiens |
| 727 | 11720112_at   | turquoise | syntrophin beta 2(SNTB2)                                                        | Homo sapiens |
| 728 | 11720113_at   | turquoise | syntrophin beta 2(SNTB2)                                                        | Homo sapiens |
| 730 | 11720115_a_at | turquoise | serine/threonine protein kinase 26(STK26)                                       | Homo sapiens |
| 731 | 11720117_a_at | turquoise | signal-induced proliferation-associated 1(SIPA1)                                | Homo sapiens |
| 733 | 11720143_at   | turquoise | centriole, cilia and spindle associated protein(CCSAP)                          | Homo sapiens |
| 734 | 11720146_a_at | turquoise | death associated protein kinase 1(DAPK1)                                        | Homo sapiens |
| 735 | 11720153_s_at | turquoise | nuclear receptor interacting protein 1(NRIP1)                                   | Homo sapiens |
| 736 | 11720161_at   | turquoise | C-X-C motif chemokine ligand 13(CXCL13)                                         | Homo sapiens |
| 737 | 11720163_at   | turquoise | vascular endothelial growth factor C(VEGFC)                                     | Homo sapiens |
| 738 | 11720167_at   | turquoise | selectin L(SELL)                                                                | Homo sapiens |
| 739 | 11720168_at   | turquoise | selectin L(SELL)                                                                | Homo sapiens |
| 741 | 11720187_a_at | turquoise | solute carrier family 27 member 3(SLC27A3)                                      | Homo sapiens |
| 746 | 11720197_a_at | turquoise | translocase of outer mitochondrial membrane 40 like(TOMM40L)                    | Homo sapiens |
| 747 | 11720204_at   | turquoise | 5'-nucleotidase domain containing 1(NTSDC1)                                     | Homo sapiens |
| 748 | 11720206_s_at | turquoise | claudin 12(CLDN12)                                                              | Homo sapiens |
| 749 | 11720207_a_at | turquoise | interleukin 2 receptor subunit gamma(IL2RG)                                     | Homo sapiens |
| 750 | 11720208_a_at | turquoise | interferon regulatory factor 9(IRF9)                                            | Homo sapiens |
| 751 | 11720209_at   | turquoise | interferon regulatory factor 9(IRF9)                                            | Homo sapiens |
| 752 | 11720218_a_at | turquoise | mitogen-activated protein kinase kinase kinase 3(MAP3K3)                        | Homo sapiens |
| 753 | 11720219_a_at | turquoise | mitogen-activated protein kinase kinase kinase 3(MAP3K3)                        | Homo sapiens |
| 754 | 11720230_at   | turquoise | testin LIM domain protein(TES)                                                  | Homo sapiens |
| 755 | 11720231_s_at | turquoise | testin LIM domain protein(TES)                                                  | Homo sapiens |
| 756 | 11720237_s_at | turquoise | mitogen-activated protein kinase 9(MAPK9)                                       | Homo sapiens |
| 758 | 11720243_x_at | turquoise | transcobalamin 2(TCN2)                                                          | Homo sapiens |
| 759 | 11720244_at   | turquoise | phospholipase C gamma 2(PLCG2)                                                  | Homo sapiens |
| 760 | 11720247_a_at | turquoise | centrosomal protein 55(CEP55)                                                   | Homo sapiens |
| 761 | 11720254_a_at | turquoise | cyclin and CBS domain divalent metal cation transport mediator 4(CNNM4)         | Homo sapiens |
| 762 | 11720264_at   | turquoise | activating signal cointegrator 1 complex subunit 3(ASCC3)                       | Homo sapiens |
| 763 | 11720280_at   | turquoise | potassium calcium-activated channel subfamily M alpha 1(KCNMA1)                 | Homo sapiens |
| 764 | 11720285_s_at | turquoise | trafficking kinesin protein 1(TRAK1)                                            | Homo sapiens |
| 765 | 11720298_at   | turquoise | C-X-C motif chemokine ligand 10(CXCL10)                                         | Homo sapiens |
| 766 | 11720300_a_at | turquoise | Src-like-adaptor(SLA)                                                           | Homo sapiens |
| 767 | 11720301_a_at | turquoise | Src-like-adaptor(SLA)                                                           | Homo sapiens |
| 768 | 11720302_a_at | turquoise | Src-like-adaptor(SLA)                                                           | Homo sapiens |
| 769 | 11720306_at   | turquoise | stress associated endoplasmic reticulum protein 1(SERP1)                        | Homo sapiens |
| 770 | 11720307_s_at | turquoise | stress associated endoplasmic reticulum protein 1(SERP1)                        | Homo sapiens |
| 771 | 11720308_x_at | turquoise | stress associated endoplasmic reticulum protein 1(SERP1)                        | Homo sapiens |
| 772 | 11720309_s_at | turquoise | stress associated endoplasmic reticulum protein 1(SERP1)                        | Homo sapiens |
| 773 | 11720320_at   | turquoise | adenylate kinase 2(AK2)                                                         | Homo sapiens |
| 774 | 11720323_s_at | turquoise | adenylate kinase 2(AK2)                                                         | Homo sapiens |
| 776 | 11720364_a_at | turquoise | GIMAP1-GIMAP5 readthrough(GIMAP1-GIMAP5)                                        | Homo sapiens |
| 777 | 11720367_a_at | turquoise | transmembrane protein 2(TMEM2)                                                  | Homo sapiens |
| 778 | 11720373_a_at | turquoise | prune exopolyphosphatase(PRUNE1)                                                | Homo sapiens |
| 779 | 11720380_a_at | turquoise | inosine monophosphate dehydrogenase 1(IMPDH1)                                   | Homo sapiens |
| 780 | 11720382_at   | turquoise | syntaxin 6(STX6)                                                                | Homo sapiens |
| 781 | 11720384_at   | turquoise | syntaxin 6(STX6)                                                                | Homo sapiens |
| 782 | 11720388_s_at | turquoise | complement C1q C chain(C1QC)                                                    | Homo sapiens |
| 783 | 11720395_a_at | turquoise | nibrin(NBN)                                                                     | Homo sapiens |



|     |               |           |                                                                                  |              |
|-----|---------------|-----------|----------------------------------------------------------------------------------|--------------|
| 784 | 11720396_x_at | turquoise | nibrin(NBN)                                                                      | Homo sapiens |
| 785 | 11720398_a_at | turquoise | nibrin(NBN)                                                                      | Homo sapiens |
| 786 | 11720427_a_at | turquoise | ilvB acetolactate synthase like(ILVBL)                                           | Homo sapiens |
| 787 | 11720430_a_at | turquoise | ORMDL sphingolipid biosynthesis regulator 1(ORMDL1)                              | Homo sapiens |
| 788 | 11720441_x_at | turquoise | olfactomedin like 2B(OLFML2B)                                                    | Homo sapiens |
| 789 | 11720443_s_at | turquoise | bromodomain adjacent to zinc finger domain 1A(BAZ1A)                             | Homo sapiens |
| 790 | 11720444_s_at | turquoise | ER lipid raft associated 1(ERLIN1)                                               | Homo sapiens |
| 791 | 11720459_s_at | turquoise | cell cycle associated protein 1(CAPRIN1)                                         | Homo sapiens |
| 792 | 11720460_x_at | turquoise | F11 receptor(F11R)                                                               | Homo sapiens |
| 793 | 11720464_x_at | turquoise | F11 receptor(F11R)                                                               | Homo sapiens |
| 795 | 11720493_s_at | turquoise | MOB kinase activator 3A(MOB3A)                                                   | Homo sapiens |
| 796 | 11720496_at   | turquoise | granzyme A(GZMA)                                                                 | Homo sapiens |
| 797 | 11720501_a_at | turquoise | ubiquitination factor E4B(UBE4B)                                                 | Homo sapiens |
| 798 | 11720502_s_at | turquoise | ubiquitination factor E4B(UBE4B)                                                 | Homo sapiens |
| 799 | 11720504_s_at | turquoise | RAB6B, member RAS oncogene family(RAB6B)                                         | Homo sapiens |
| 800 | 11720510_a_at | turquoise | apolipoprotein B mRNA editing enzyme catalytic subunit 3G(APOBEC3G)              | Homo sapiens |
| 801 | 11720511_a_at | turquoise | calcium regulated heat stable protein 1(CARHSP1)                                 | Homo sapiens |
| 803 | 11720537_at   | turquoise | methylmalonic aciduria (cobalamin deficiency) cblB type(MMAB)                    | Homo sapiens |
| 804 | 11720538_at   | turquoise | feline leukemia virus subgroup C cellular receptor family member 2(FLVCR2)       | Homo sapiens |
| 805 | 11720551_a_at | turquoise | intermediate filament family orphan 1(IFFO1)                                     | Homo sapiens |
| 806 | 11720552_a_at | turquoise | intermediate filament family orphan 1(IFFO1)                                     | Homo sapiens |
| 807 | 11720554_a_at | turquoise | Rho/Rac guanine nucleotide exchange factor 18(ARHGEF18)                          | Homo sapiens |
| 808 | 11720566_at   | turquoise | branched chain amino acid transaminase 1(BCAT1)                                  | Homo sapiens |
| 809 | 11720570_a_at | turquoise | jade family PHD finger 2(JADE2)                                                  | Homo sapiens |
| 810 | 11720573_at   | turquoise | ATPase phospholipid transporting 8B1(ATP8B1)                                     | Homo sapiens |
| 811 | 11720574_s_at | turquoise | ATPase phospholipid transporting 8B1(ATP8B1)                                     | Homo sapiens |
| 812 | 11720587_s_at | turquoise | structural maintenance of chromosomes flexible hinge domain containing 1(SMCHD1) | Homo sapiens |
| 813 | 11720602_at   | turquoise | synaptotagmin 11(SYT11)                                                          | Homo sapiens |
| 814 | 11720609_at   | turquoise | prohibitin(PHB)                                                                  | Homo sapiens |
| 816 | 11720621_s_at | turquoise | ATP citrate lyase(ACLY)                                                          | Homo sapiens |
| 817 | 11720623_a_at | turquoise | myeloid differentiation primary response 88(MYD88)                               | Homo sapiens |
| 818 | 11720624_a_at | turquoise | myeloid differentiation primary response 88(MYD88)                               | Homo sapiens |
| 823 | 11720644_a_at | turquoise | platelet and endothelial cell adhesion molecule 1(PECAM1)                        | Homo sapiens |
| 824 | 11720646_at   | turquoise | serine palmitoyltransferase long chain base subunit 2(SPTLC2)                    | Homo sapiens |
| 825 | 11720657_x_at | turquoise | major histocompatibility complex, class II, DR beta 5(HLA-DRB5)                  | Homo sapiens |
| 826 | 11720672_a_at | turquoise | protein phosphatase, Mg2+/Mn2+ dependent 1A(PPM1A)                               | Homo sapiens |
| 829 | 11720679_a_at | turquoise | CKLF-CMTM1 readthrough(CKLF-CMTM1)                                               | Homo sapiens |
| 830 | 11720680_a_at | turquoise | diacylglycerol kinase alpha(DGKA)                                                | Homo sapiens |
| 831 | 11720694_a_at | turquoise | HEN1 methyltransferase homolog 1(HENMT1)                                         | Homo sapiens |
| 832 | 11720695_at   | turquoise | chromosome 1 open reading frame 54(C1orf54)                                      | Homo sapiens |
| 833 | 11720725_at   | turquoise | zyg-11 family member B, cell cycle regulator(ZYG11B)                             | Homo sapiens |
| 834 | 11720747_a_at | turquoise | adenylate cyclase 7(ADCY7)                                                       | Homo sapiens |
| 835 | 11720751_a_at | turquoise | inositol polyphosphate-1-phosphatase(INPP1)                                      | Homo sapiens |
| 836 | 11720754_x_at | turquoise | actin beta(ACTB)                                                                 | Homo sapiens |
| 837 | 11720755_at   | turquoise | signal transducer and activator of transcription 3(STAT3)                        | Homo sapiens |
| 838 | 11720756_at   | turquoise | signal transducer and activator of transcription 3(STAT3)                        | Homo sapiens |
| 839 | 11720763_a_at | turquoise | selectin P ligand(SELPLG)                                                        | Homo sapiens |
| 840 | 11720769_a_at | turquoise | peptidylprolyl isomerase F(PP1F)                                                 | Homo sapiens |
| 846 | 11720793_x_at | turquoise | acetoacetyl-CoA synthetase(AACS)                                                 | Homo sapiens |
| 847 | 11720798_at   | turquoise | RAB8B, member RAS oncogene family(RAB8B)                                         | Homo sapiens |
| 848 | 11720799_s_at | turquoise | RAB8B, member RAS oncogene family(RAB8B)                                         | Homo sapiens |
| 849 | 11720800_a_at | turquoise | RAB8B, member RAS oncogene family(RAB8B)                                         | Homo sapiens |
| 850 | 11720802_s_at | turquoise | bridging integrator 3(BIN3)                                                      | Homo sapiens |
| 853 | 11720827_a_at | turquoise | centromere protein W(CENPW)                                                      | Homo sapiens |
| 854 | 11720832_x_at | turquoise | SRY-box 18(SOX18)                                                                | Homo sapiens |
| 855 | 11720842_at   | turquoise | ras homolog family member D(RHOD)                                                | Homo sapiens |
| 856 | 11720847_s_at | turquoise | PHD finger protein 6(PHF6)                                                       | Homo sapiens |
| 857 | 11720859_s_at | turquoise | abhydrolase domain containing 3(ABHD3)                                           | Homo sapiens |
| 858 | 11720860_s_at | turquoise | Rho guanine nucleotide exchange factor 3(ARHGEF3)                                | Homo sapiens |
| 859 | 11720861_a_at | turquoise | Rho guanine nucleotide exchange factor 3(ARHGEF3)                                | Homo sapiens |
| 861 | 11720867_x_at | turquoise | placenta specific 8(PLAC8)                                                       | Homo sapiens |
| 863 | 11720891_a_at | turquoise | ubiquitin specific peptidase 20(USP20)                                           | Homo sapiens |
| 864 | 11720893_s_at | turquoise | SOS Ras/Rac guanine nucleotide exchange factor 1(SOS1)                           | Homo sapiens |
| 865 | 11720907_x_at | turquoise | semaphorin 3F(SEMA3F)                                                            | Homo sapiens |
| 866 | 11720909_a_at | turquoise | transmembrane protein 44(TMEM44)                                                 | Homo sapiens |
| 867 | 11720910_a_at | turquoise | neural EGFL like 2(NELL2)                                                        | Homo sapiens |
| 868 | 11720922_a_at | turquoise | HLA complex P5 (non-protein coding)(HCP5)                                        | Homo sapiens |
| 869 | 11720923_a_at | turquoise | HLA complex P5 (non-protein coding)(HCP5)                                        | Homo sapiens |
| 870 | 11720943_a_at | turquoise | regulator of G-protein signaling 16(RGS16)                                       | Homo sapiens |
| 871 | 11720944_at   | turquoise | regulator of G-protein signaling 16(RGS16)                                       | Homo sapiens |
| 872 | 11720963_a_at | turquoise | deoxycytidine kinase(DCK)                                                        | Homo sapiens |
| 873 | 11720964_s_at | turquoise | deoxycytidine kinase(DCK)                                                        | Homo sapiens |
| 874 | 11720965_at   | turquoise | deoxycytidine kinase(DCK)                                                        | Homo sapiens |
| 875 | 11720966_x_at | turquoise | deoxycytidine kinase(DCK)                                                        | Homo sapiens |
| 876 | 11720970_at   | turquoise | topoisomerase (DNA) II alpha(TOP2A)                                              | Homo sapiens |
| 877 | 11720971_at   | turquoise | topoisomerase (DNA) II alpha(TOP2A)                                              | Homo sapiens |
| 878 | 11720972_at   | turquoise | topoisomerase (DNA) II alpha(TOP2A)                                              | Homo sapiens |
| 879 | 11720973_x_at | turquoise | ankyrin repeat and SOCS box containing 8(ASB8)                                   | Homo sapiens |
| 881 | 11720977_a_at | turquoise | tryptophanyl tRNA synthetase 2, mitochondrial(WARS2)                             | Homo sapiens |
| 882 | 11720982_s_at | turquoise | protein tyrosine kinase 2 beta(PTK2B)                                            | Homo sapiens |
| 883 | 11720989_a_at | turquoise | solute carrier family 7 member 7(SLC7A7)                                         | Homo sapiens |
| 884 | 11720994_x_at | turquoise | C-C motif chemokine ligand 3(CCL3)                                               | Homo sapiens |

|     |               |           |                                                                             |              |
|-----|---------------|-----------|-----------------------------------------------------------------------------|--------------|
| 885 | 11720998_a_at | turquoise | bridging integrator 2(BIN2)                                                 | Homo sapiens |
| 886 | 11720999_a_at | turquoise | bridging integrator 2(BIN2)                                                 | Homo sapiens |
| 887 | 11721027_a_at | turquoise | cyclin G associated kinase(GAK)                                             | Homo sapiens |
| 891 | 11721043_at   | turquoise | exoribonuclease 1(ER1)                                                      | Homo sapiens |
| 892 | 11721044_a_at | turquoise | exoribonuclease 1(ER1)                                                      | Homo sapiens |
| 893 | 11721053_s_at | turquoise | kelch like family member 42(KLHL42)                                         | Homo sapiens |
| 894 | 11721054_at   | turquoise | kelch like family member 42(KLHL42)                                         | Homo sapiens |
| 895 | 11721055_x_at | turquoise | protein kinase, X-linked(PRKX)                                              | Homo sapiens |
| 896 | 11721056_x_at | turquoise | protein kinase, X-linked(PRKX)                                              | Homo sapiens |
| 897 | 11721061_a_at | turquoise | IQ motif containing GTPase activating protein 2(IQGAP2)                     | Homo sapiens |
| 899 | 11721096_a_at | turquoise | thioredoxin related transmembrane protein 1(TMXX1)                          | Homo sapiens |
| 900 | 11721097_at   | turquoise | thioredoxin related transmembrane protein 1(TMXX1)                          | Homo sapiens |
| 901 | 11721098_x_at | turquoise | thioredoxin related transmembrane protein 1(TMXX1)                          | Homo sapiens |
| 902 | 11721099_at   | turquoise | complement C3a receptor 1(C3AR1)                                            | Homo sapiens |
| 904 | 11721120_a_at | turquoise | nudix hydrolase 5(NUDT5)                                                    | Homo sapiens |
| 905 | 11721125_at   | turquoise | signal peptide peptidase like 2A(SPPL2A)                                    | Homo sapiens |
| 906 | 11721140_a_at | turquoise | transcription elongation factor A3(TCEA3)                                   | Homo sapiens |
| 907 | 11721141_x_at | turquoise | transcription elongation factor A3(TCEA3)                                   | Homo sapiens |
| 908 | 11721143_a_at | turquoise | marker of proliferation Ki-67(MKI67)                                        | Homo sapiens |
| 909 | 11721145_s_at | turquoise | marker of proliferation Ki-67(MKI67)                                        | Homo sapiens |
| 910 | 11721147_at   | turquoise | synaptogyrin 1(SYNGR1)                                                      | Homo sapiens |
| 911 | 11721149_a_at | turquoise | LysM domain containing 2(LYSMD2)                                            | Homo sapiens |
| 912 | 11721157_at   | turquoise | nth like DNA glycosylase 1(NTHL1)                                           | Homo sapiens |
| 913 | 11721163_a_at | turquoise | KH and NYN domain containing(KHNYN)                                         | Homo sapiens |
| 914 | 11721169_a_at | turquoise | PYD and CARD domain containing(PYCARD)                                      | Homo sapiens |
| 915 | 11721184_at   | turquoise | tetraspanin 33(TSPAN33)                                                     | Homo sapiens |
| 916 | 11721202_at   | turquoise | ribonuclease A family member k6(RNASE6)                                     | Homo sapiens |
| 917 | 11721208_at   | turquoise | intermediate filament family orphan 2(IFO2)                                 | Homo sapiens |
| 918 | 11721223_at   | turquoise | acyl-CoA oxidase 2(ACOX2)                                                   | Homo sapiens |
| 919 | 11721243_a_at | turquoise | leucine aminopeptidase 3(LAP3)                                              | Homo sapiens |
| 920 | 11721248_s_at | turquoise | G protein subunit gamma 2(GNG2)                                             | Homo sapiens |
| 922 | 11721272_at   | turquoise | leucine rich repeat containing 59(LRRC59)                                   | Homo sapiens |
| 924 | 11721297_at   | turquoise | ABRA C-terminal like(ABRACL)                                                | Homo sapiens |
| 925 | 11721302_a_at | turquoise | C-type lectin domain family 2 member B(CLEC2B)                              | Homo sapiens |
| 926 | 11721303_at   | turquoise | C-type lectin domain family 2 member B(CLEC2B)                              | Homo sapiens |
| 927 | 11721313_a_at | turquoise | extended synaptotagmin 2(ESYT2)                                             | Homo sapiens |
| 928 | 11721346_a_at | turquoise | macrophage expressed 1(MPEG1)                                               | Homo sapiens |
| 929 | 11721347_a_at | turquoise | macrophage expressed 1(MPEG1)                                               | Homo sapiens |
| 930 | 11721349_s_at | turquoise | ubiquitin specific peptidase 18(USP18)                                      | Homo sapiens |
| 931 | 11721366_at   | turquoise | tripartite motif containing 47(TRIM47)                                      | Homo sapiens |
| 932 | 11721380_x_at | turquoise | N-acetylglucosamine-1-phosphate transferase alpha and beta subunits(GNPTAB) | Homo sapiens |
| 933 | 11721390_at   | turquoise | HtrA serine peptidase 3(HTRA3)                                              | Homo sapiens |
| 934 | 11721408_a_at | turquoise | polyamine oxidase(PAOX)                                                     | Homo sapiens |
| 935 | 11721432_a_at | turquoise | microtubule associated protein 1S(MAP1S)                                    | Homo sapiens |
| 936 | 11721454_a_at | turquoise | serpin family A member 1(SERPINA1)                                          | Homo sapiens |
| 937 | 11721455_s_at | turquoise | serpin family A member 1(SERPINA1)                                          | Homo sapiens |
| 938 | 11721456_x_at | turquoise | serpin family A member 1(SERPINA1)                                          | Homo sapiens |
| 939 | 11721460_s_at | turquoise | TAP binding protein like(TAPBPL)                                            | Homo sapiens |
| 943 | 11721491_a_at | turquoise | fructose-bisphosphatase 1(FBP1)                                             | Homo sapiens |
| 944 | 11721493_a_at | turquoise | sulfatase 2(SULF2)                                                          | Homo sapiens |
| 945 | 11721504_a_at | turquoise | CKLF-CMTM1 readthrough(CKLF-CMTM1)                                          | Homo sapiens |
| 946 | 11721512_a_at | turquoise | translocase of inner mitochondrial membrane 21(TIMM21)                      | Homo sapiens |
| 947 | 11721554_a_at | turquoise | collagen beta(1-O)galactosyltransferase 1(COLGALT1)                         | Homo sapiens |
| 948 | 11721557_a_at | turquoise | ATP binding cassette subfamily A member 8(ABCA8)                            | Homo sapiens |
| 949 | 11721570_a_at | turquoise | family with sequence similarity 173 member B(FAM173B)                       | Homo sapiens |
| 950 | 11721573_a_at | turquoise | activin A receptor like type 1(ACVRL1)                                      | Homo sapiens |
| 951 | 11721574_a_at | turquoise | E74 like ETS transcription factor 4(ELF4)                                   | Homo sapiens |
| 952 | 11721577_at   | turquoise | tumor necrosis factor(TNF)                                                  | Homo sapiens |
| 953 | 11721582_a_at | turquoise | lymphoid restricted membrane protein(LRMP)                                  | Homo sapiens |
| 954 | 11721583_x_at | turquoise | lymphoid restricted membrane protein(LRMP)                                  | Homo sapiens |
| 955 | 11721587_at   | turquoise | TNF receptor associated factor 1(TRAF1)                                     | Homo sapiens |
| 956 | 11721588_at   | turquoise | TNF receptor associated factor 1(TRAF1)                                     | Homo sapiens |
| 957 | 11721590_a_at | turquoise | solute carrier family 17 member 9(SLC17A9)                                  | Homo sapiens |
| 958 | 11721609_a_at | turquoise | poly(A) binding protein cytoplasmic 1 like(PABPC1L)                         | Homo sapiens |
| 959 | 11721615_a_at | turquoise | thymocyte selection associated family member 2(THEMIS2)                     | Homo sapiens |
| 960 | 11721623_a_at | turquoise | mesenchyme homeobox 1(MEOX1)                                                | Homo sapiens |
| 961 | 11721626_a_at | turquoise | septin 6(SEPT6)                                                             | Homo sapiens |
| 962 | 11721627_a_at | turquoise | septin 6(SEPT6)                                                             | Homo sapiens |
| 963 | 11721628_a_at | turquoise | septin 6(SEPT6)                                                             | Homo sapiens |
| 964 | 11721629_a_at | turquoise | MAF bZIP transcription factor B(MAFB)                                       | Homo sapiens |
| 965 | 11721630_at   | turquoise | MAF bZIP transcription factor B(MAFB)                                       | Homo sapiens |
| 966 | 11721651_at   | turquoise | cadherin 5(CDH5)                                                            | Homo sapiens |
| 967 | 11721661_a_at | turquoise | thromboxane A synthase 1(TBXAS1)                                            | Homo sapiens |
| 972 | 11721685_at   | turquoise | C-C motif chemokine ligand 19(CCL19)                                        | Homo sapiens |
| 973 | 11721695_s_at | turquoise | dual specificity phosphatase 2(DUSP2)                                       | Homo sapiens |
| 974 | 11721702_a_at | turquoise | CKLF like MARVEL transmembrane domain containing 7(CMTM7)                   | Homo sapiens |
| 975 | 11721704_a_at | turquoise | cysteine rich protein 1(CRIP1)                                              | Homo sapiens |
| 977 | 11721719_at   | turquoise | N-acylethanolamine acid amidase(NAAA)                                       | Homo sapiens |
| 978 | 11721722_x_at | turquoise | MSH5-SAPCD1 readthrough (NMD candidate)(MSH5-SAPCD1)                        | Homo sapiens |
| 979 | 11721728_a_at | turquoise | Rho GTPase activating protein 30(ARHGAP30)                                  | Homo sapiens |
| 980 | 11721733_a_at | turquoise | GTP cyclohydrolase 1(GCH1)                                                  | Homo sapiens |
| 981 | 11721734_s_at | turquoise | GTP cyclohydrolase 1(GCH1)                                                  | Homo sapiens |

|      |               |           |                                                                    |              |
|------|---------------|-----------|--------------------------------------------------------------------|--------------|
| 982  | 11721755_at   | turquoise | ALG13, UDP-N-acetylglucosaminyltransferase subunit(ALG13)          | Homo sapiens |
| 983  | 11721760_a_at | turquoise | tRNA splicing endonuclease subunit 54(TSEN54)                      | Homo sapiens |
| 984  | 11721762_a_at | turquoise | phosphoinositide-3-kinase regulatory subunit 5(PIK3R5)             | Homo sapiens |
| 985  | 11721773_at   | turquoise | WSC domain containing 1(WSCD1)                                     | Homo sapiens |
| 986  | 11721780_a_at | turquoise | LLGL2, scribble cell polarity complex component(LLGL2)             | Homo sapiens |
| 987  | 11721804_a_at | turquoise | BUB3, mitotic checkpoint protein(BUB3)                             | Homo sapiens |
| 988  | 11721810_at   | turquoise | Pim-2 proto-oncogene, serine/threonine kinase(PIM2)                | Homo sapiens |
| 989  | 11721815_a_at | turquoise | Fc fragment of IgM receptor(FCMR)                                  | Homo sapiens |
| 990  | 11721816_a_at | turquoise | Fc fragment of IgM receptor(FCMR)                                  | Homo sapiens |
| 991  | 11721827_a_at | turquoise | zwilch kinetochore protein(ZWILCH)                                 | Homo sapiens |
| 992  | 11721828_x_at | turquoise | zwilch kinetochore protein(ZWILCH)                                 | Homo sapiens |
| 994  | 11721838_a_at | turquoise | GLI pathogenesis related 1(GLIPR1)                                 | Homo sapiens |
| 995  | 11721839_at   | turquoise | GLI pathogenesis related 1(GLIPR1)                                 | Homo sapiens |
| 996  | 11721840_at   | turquoise | GLI pathogenesis related 1(GLIPR1)                                 | Homo sapiens |
| 997  | 11721841_at   | turquoise | GLI pathogenesis related 1(GLIPR1)                                 | Homo sapiens |
| 998  | 11721842_a_at | turquoise | GLI pathogenesis related 1(GLIPR1)                                 | Homo sapiens |
| 999  | 11721843_a_at | turquoise | atlastin GTPase 3(ATL3)                                            | Homo sapiens |
| 1001 | 11721859_at   | turquoise | mitochondrial intermediate peptidase(MIPEP)                        | Homo sapiens |
| 1002 | 11721860_s_at | turquoise | syntaxin 12(STX12)                                                 | Homo sapiens |
| 1003 | 11721861_at   | turquoise | syntaxin 12(STX12)                                                 | Homo sapiens |
| 1004 | 11721872_at   | turquoise | family with sequence similarity 110 member A(FAM110A)              | Homo sapiens |
| 1005 | 11721873_at   | turquoise | interferon induced protein with tetratricopeptide repeats 2(IFIT2) | Homo sapiens |
| 1006 | 11721874_at   | turquoise | interferon induced protein with tetratricopeptide repeats 2(IFIT2) | Homo sapiens |
| 1007 | 11721879_s_at | turquoise | AT-rich interaction domain 4B(ARID4B)                              | Homo sapiens |
| 1008 | 11721880_s_at | turquoise | AT-rich interaction domain 4B(ARID4B)                              | Homo sapiens |
| 1009 | 11721885_s_at | turquoise | cell division cycle 42(CDC42)                                      | Homo sapiens |
| 1010 | 11721897_a_at | turquoise | DEXH-box helicase 58(DHX58)                                        | Homo sapiens |
| 1011 | 11721900_at   | turquoise | ficolin 1(FCN1)                                                    | Homo sapiens |
| 1012 | 11721906_s_at | turquoise | proteasome subunit alpha 4(PSMA4)                                  | Homo sapiens |
| 1013 | 11721907_at   | turquoise | sphingosine-1-phosphate phosphatase 1(SGPP1)                       | Homo sapiens |
| 1014 | 11721922_at   | turquoise | protein kinase C beta(PRKCB)                                       | Homo sapiens |
| 1015 | 11721923_a_at | turquoise | protein kinase C beta(PRKCB)                                       | Homo sapiens |
| 1016 | 11721924_s_at | turquoise | protein kinase C beta(PRKCB)                                       | Homo sapiens |
| 1017 | 11721927_at   | turquoise | transmembrane channel like 8(TMC8)                                 | Homo sapiens |
| 1018 | 11721935_at   | turquoise | DnaJ heat shock protein family (Hsp40) member C27(DNAJC27)         | Homo sapiens |
| 1019 | 11721954_s_at | turquoise | ring finger protein 41(RNF41)                                      | Homo sapiens |
| 1020 | 11721960_a_at | turquoise | sorting nexin family member 30(SNX30)                              | Homo sapiens |
| 1021 | 11721974_a_at | turquoise | sulfite oxidase(SUOX)                                              | Homo sapiens |
| 1022 | 11721988_at   | turquoise | coiled-coil domain containing 191(CCDC191)                         | Homo sapiens |
| 1023 | 11721994_s_at | turquoise | ubiquitin conjugating enzyme E2 L6(UBE2L6)                         | Homo sapiens |
| 1024 | 11721996_a_at | turquoise | poly(ADP-ribose) polymerase family member 14(PARP14)               | Homo sapiens |
| 1025 | 11721997_s_at | turquoise | poly(ADP-ribose) polymerase family member 14(PARP14)               | Homo sapiens |
| 1026 | 11721998_a_at | turquoise | poly(ADP-ribose) polymerase family member 14(PARP14)               | Homo sapiens |
| 1027 | 11722003_at   | turquoise | cytochrome c, somatic(CYCS)                                        | Homo sapiens |
| 1029 | 11722005_a_at | turquoise | nuclear autoantigenic sperm protein(NASP)                          | Homo sapiens |
| 1030 | 11722009_a_at | turquoise | chloride intracellular channel 1(CLIC1)                            | Homo sapiens |
| 1031 | 11722011_a_at | turquoise | GTPase, IMAP family member 4(GIMAP4)                               | Homo sapiens |
| 1032 | 11722012_a_at | turquoise | GTPase, IMAP family member 4(GIMAP4)                               | Homo sapiens |
| 1034 | 11722038_a_at | turquoise | FES proto-oncogene, tyrosine kinase(FES)                           | Homo sapiens |
| 1035 | 11722039_x_at | turquoise | FES proto-oncogene, tyrosine kinase(FES)                           | Homo sapiens |
| 1037 | 11722049_a_at | turquoise | dual specificity phosphatase 6(DUSP6)                              | Homo sapiens |
| 1038 | 11722072_at   | turquoise | mesoderm development candidate 1(MESDC1)                           | Homo sapiens |
| 1039 | 11722086_x_at | turquoise | septin 1(SEPT1)                                                    | Homo sapiens |
| 1040 | 11722089_a_at | turquoise | echinoderm microtubule associated protein like 3(EML3)             | Homo sapiens |
| 1041 | 11722095_a_at | turquoise | kinesin family member 21B(KIF21B)                                  | Homo sapiens |
| 1042 | 11722120_a_at | turquoise | kinetochore associated 1(KNTC1)                                    | Homo sapiens |
| 1043 | 11722130_s_at | turquoise | enoyl-CoA hydratase domain containing 2(ECHDC2)                    | Homo sapiens |
| 1044 | 11722134_a_at | turquoise | TNF receptor superfamily member 25(TNFRSF25)                       | Homo sapiens |
| 1045 | 11722141_at   | turquoise | RELB proto-oncogene, NF-kB subunit(RELB)                           | Homo sapiens |
| 1046 | 11722143_at   | turquoise | tetratricopeptide repeat and ankyrin repeat containing 1(TRANK1)   | Homo sapiens |
| 1047 | 11722147_at   | turquoise | poly(A) binding protein interacting protein 2B(PAIP2B)             | Homo sapiens |
| 1048 | 11722152_s_at | turquoise | eukaryotic translation initiation factor 2 alpha kinase 3(EIF2AK3) | Homo sapiens |
| 1049 | 11722170_a_at | turquoise | coronin 7(CORO7)                                                   | Homo sapiens |
| 1051 | 11722174_a_at | turquoise | ubiquinol-cytochrome c reductase complex assembly factor 1(UQCC1)  | Homo sapiens |
| 1052 | 11722183_s_at | turquoise | ATPase H+ transporting V1 subunit C1(ATP6V1C1)                     | Homo sapiens |
| 1053 | 11722193_a_at | turquoise | chromosome 12 open reading frame 75(C12orf75)                      | Homo sapiens |
| 1055 | 11722225_a_at | turquoise | ADAM metallopeptidase domain 8(ADAM8)                              | Homo sapiens |
| 1057 | 11722228_at   | turquoise | DnaJ heat shock protein family (Hsp40) member C30(DNAJC30)         | Homo sapiens |
| 1058 | 11722247_a_at | turquoise | Ras association domain family member 1(RASSF1)                     | Homo sapiens |
| 1059 | 11722248_a_at | turquoise | Ras association domain family member 1(RASSF1)                     | Homo sapiens |
| 1060 | 11722262_at   | turquoise | ER degradation enhancing alpha-mannosidase like protein 1(EDEM1)   | Homo sapiens |
| 1061 | 11722269_a_at | turquoise | SAM and SH3 domain containing 3(SASH3)                             | Homo sapiens |
| 1062 | 11722270_at   | turquoise | SAM and SH3 domain containing 3(SASH3)                             | Homo sapiens |
| 1063 | 11722286_a_at | turquoise | solute carrier family 30 member 7(SLC30A7)                         | Homo sapiens |
| 1064 | 11722287_a_at | turquoise | solute carrier family 30 member 7(SLC30A7)                         | Homo sapiens |
| 1065 | 11722298_a_at | turquoise | RAB29, member RAS oncogene family(RAB29)                           | Homo sapiens |
| 1066 | 11722299_a_at | turquoise | RAB29, member RAS oncogene family(RAB29)                           | Homo sapiens |
| 1067 | 11722300_a_at | turquoise | ETS proto-oncogene 1, transcription factor(ETS1)                   | Homo sapiens |
| 1068 | 11722302_a_at | turquoise | LRR binding FLII interacting protein 1(LRRFIP1)                    | Homo sapiens |
| 1069 | 11722303_x_at | turquoise | LRR binding FLII interacting protein 1(LRRFIP1)                    | Homo sapiens |
| 1070 | 11722304_a_at | turquoise | LRR binding FLII interacting protein 1(LRRFIP1)                    | Homo sapiens |
| 1071 | 11722313_a_at | turquoise | Rap guanine nucleotide exchange factor 6(RAPGEF6)                  | Homo sapiens |

|      |               |           |                                                                                                               |              |
|------|---------------|-----------|---------------------------------------------------------------------------------------------------------------|--------------|
| 1072 | 11722314_a_at | turquoise | Rap guanine nucleotide exchange factor 6(RAPGEF6)                                                             | Homo sapiens |
| 1073 | 11722321_at   | turquoise | hematopoietically expressed homeobox(HHEX)                                                                    | Homo sapiens |
| 1074 | 11722333_a_at | turquoise | fibronectin type III domain containing 5(FNDC5)                                                               | Homo sapiens |
| 1075 | 11722334_at   | turquoise | fibronectin type III domain containing 5(FNDC5)                                                               | Homo sapiens |
| 1076 | 11722335_a_at | turquoise | fibronectin type III domain containing 5(FNDC5)                                                               | Homo sapiens |
| 1078 | 11722349_a_at | turquoise | Lck interacting transmembrane adaptor 1(LIME1)                                                                | Homo sapiens |
| 1079 | 11722355_s_at | turquoise | DAB2, clathrin adaptor protein(DAB2)                                                                          | Homo sapiens |
| 1080 | 11722356_a_at | turquoise | DAB2, clathrin adaptor protein(DAB2)                                                                          | Homo sapiens |
| 1082 | 11722368_a_at | turquoise | tripartite motif containing 22(TRIM22)                                                                        | Homo sapiens |
| 1083 | 11722369_x_at | turquoise | tripartite motif containing 22(TRIM22)                                                                        | Homo sapiens |
| 1084 | 11722370_a_at | turquoise | tripartite motif containing 22(TRIM22)                                                                        | Homo sapiens |
| 1085 | 11722371_x_at | turquoise | tripartite motif containing 22(TRIM22)                                                                        | Homo sapiens |
| 1086 | 11722403_a_at | turquoise | pleckstrin homology domain containing O1(PLEKHO1)                                                             | Homo sapiens |
| 1087 | 11722417_a_at | turquoise | La ribonucleoprotein domain family member 6(LARP6)                                                            | Homo sapiens |
| 1088 | 11722418_at   | turquoise | UTP3, small subunit processome component homolog (S. cerevisiae)(UTP3)                                        | Homo sapiens |
| 1089 | 11722419_s_at | turquoise | UTP3, small subunit processome component homolog (S. cerevisiae)(UTP3)                                        | Homo sapiens |
| 1090 | 11722425_s_at | turquoise | neural precursor cell expressed, developmentally down-regulated 4-like, E3 ubiquitin protein ligase(NEDD4L)   | Homo sapiens |
| 1091 | 11722426_a_at | turquoise | fibrinogen like 2(FGL2)                                                                                       | Homo sapiens |
| 1092 | 11722427_at   | turquoise | fibrinogen like 2(FGL2)                                                                                       | Homo sapiens |
| 1093 | 11722446_a_at | turquoise | sirtuin 3(SIRT3)                                                                                              | Homo sapiens |
| 1094 | 11722447_a_at | turquoise | sirtuin 3(SIRT3)                                                                                              | Homo sapiens |
| 1095 | 11722449_x_at | turquoise | thymidine phosphorylase(TYMP)                                                                                 | Homo sapiens |
| 1096 | 11722458_a_at | turquoise | transmembrane protein 206(TMEM206)                                                                            | Homo sapiens |
| 1097 | 11722462_a_at | turquoise | tankyrase 2(TNKS2)                                                                                            | Homo sapiens |
| 1098 | 11722471_a_at | turquoise | paternally expressed 3(PEG3)                                                                                  | Homo sapiens |
| 1099 | 11722472_a_at | turquoise | paternally expressed 3(PEG3)                                                                                  | Homo sapiens |
| 1100 | 11722474_a_at | turquoise | diacylglycerol kinase theta(DGKQ)                                                                             | Homo sapiens |
| 1101 | 11722480_a_at | turquoise | FGR proto-oncogene, Src family tyrosine kinase(FGR)                                                           | Homo sapiens |
| 1102 | 11722481_a_at | turquoise | mitochondrial fission factor(MFF)                                                                             | Homo sapiens |
| 1104 | 11722501_a_at | turquoise | p21 (RAC1) activated kinase 6(PAK6)                                                                           | Homo sapiens |
| 1105 | 11722502_a_at | turquoise | p21 (RAC1) activated kinase 6(PAK6)                                                                           | Homo sapiens |
| 1106 | 11722512_a_at | turquoise | SP110 nuclear body protein(SP110)                                                                             | Homo sapiens |
| 1107 | 11722535_a_at | turquoise | cyclin Y like 1(CCNYL1)                                                                                       | Homo sapiens |
| 1108 | 11722538_a_at | turquoise | transmembrane and coiled-coil domains 6(TMCO6)                                                                | Homo sapiens |
| 1110 | 11722571_at   | turquoise | cyclin A2(CCN2)                                                                                               | Homo sapiens |
| 1111 | 11722573_a_at | turquoise | endoplasmic reticulum aminopeptidase 2(ERAP2)                                                                 | Homo sapiens |
| 1112 | 11722574_at   | turquoise | adaptor related protein complex 1 gamma 1 subunit(AP1G1)                                                      | Homo sapiens |
| 1113 | 11722577_a_at | turquoise | prolyl 3-hydroxylase 1(P3H1)                                                                                  | Homo sapiens |
| 1114 | 11722609_a_at | turquoise | CDC42 small effector 1(CDC42SE1)                                                                              | Homo sapiens |
| 1115 | 11722620_a_at | turquoise | aquaporin 4(AQP4)                                                                                             | Homo sapiens |
| 1116 | 11722635_at   | turquoise | interleukin 2 receptor subunit beta(IL2RB)                                                                    | Homo sapiens |
| 1117 | 11722660_a_at | turquoise | nuclear factor, erythroid 2 like 3(NFE2L3)                                                                    | Homo sapiens |
| 1118 | 11722679_a_at | turquoise | poly(ADP-ribose) polymerase family member 8(PARP8)                                                            | Homo sapiens |
| 1119 | 11722680_at   | turquoise | hematopoietic cell signal transducer(HCST)                                                                    | Homo sapiens |
| 1120 | 11722697_x_at | turquoise | SFI1 centrin binding protein(SFI1)                                                                            | Homo sapiens |
| 1121 | 11722705_at   | turquoise | UDP-GlcNAc:betaGal beta-1,3-N-acetylglucosaminyltransferase 5(B3GNT5)                                         | Homo sapiens |
| 1122 | 11722708_a_at | turquoise | coiled-coil serine rich protein 2(CCSER2)                                                                     | Homo sapiens |
| 1123 | 11722721_a_at | turquoise | centromere protein V(CENPV)                                                                                   | Homo sapiens |
| 1124 | 11722725_a_at | turquoise | colony stimulating factor 2 receptor beta common subunit(CSF2RB)                                              | Homo sapiens |
| 1125 | 11722728_a_at | turquoise | early growth response 2(EGR2)                                                                                 | Homo sapiens |
| 1126 | 11722747_at   | turquoise | hook microtubule tethering protein 3(HOOK3)                                                                   | Homo sapiens |
| 1127 | 11722765_a_at | turquoise | GIT ArfGAP 2(GIT2)                                                                                            | Homo sapiens |
| 1128 | 11722768_s_at | turquoise | Rap guanine nucleotide exchange factor 5(RAPGEF5)                                                             | Homo sapiens |
| 1129 | 11722778_s_at | turquoise | ectonucleotide pyrophosphatase/phosphodiesterase 2(ENPP2)                                                     | Homo sapiens |
| 1130 | 11722794_at   | turquoise | glycerophosphodiester phosphodiesterase 1(GDE1)                                                               | Homo sapiens |
| 1132 | 11722806_at   | turquoise | RAB35, member RAS oncogene family(RAB35)                                                                      | Homo sapiens |
| 1133 | 11722807_a_at | turquoise | WD repeat domain 54(WDR54)                                                                                    | Homo sapiens |
| 1134 | 11722818_a_at | turquoise | gamma-glutamyl hydrolase(GGH)                                                                                 | Homo sapiens |
| 1135 | 11722826_a_at | turquoise | non-SMC condensin I complex subunit G(NCAPG)                                                                  | Homo sapiens |
| 1137 | 11722850_a_at | turquoise | baculoviral IAP repeat containing 3(BIRC3)                                                                    | Homo sapiens |
| 1138 | 11722851_at   | turquoise | baculoviral IAP repeat containing 3(BIRC3)                                                                    | Homo sapiens |
| 1139 | 11722852_s_at | turquoise | baculoviral IAP repeat containing 3(BIRC3)                                                                    | Homo sapiens |
| 1140 | 11722874_s_at | turquoise | male-specific lethal 3 homolog (Drosophila)(MSL3)                                                             | Homo sapiens |
| 1141 | 11722880_a_at | turquoise | PHD finger protein 19(PHF19)                                                                                  | Homo sapiens |
| 1142 | 11722886_s_at | turquoise | embigin(EMB)                                                                                                  | Homo sapiens |
| 1143 | 11722887_x_at | turquoise | embigin(EMB)                                                                                                  | Homo sapiens |
| 1144 | 11722888_s_at | turquoise | embigin(EMB)                                                                                                  | Homo sapiens |
| 1145 | 11722904_a_at | turquoise | TBC1 domain family member 9(TBC1D9)                                                                           | Homo sapiens |
| 1149 | 11722923_a_at | turquoise | family with sequence similarity 122B(FAM122B)                                                                 | Homo sapiens |
| 1150 | 11722928_a_at | turquoise | microRNA 4656(MIR4656)                                                                                        | Homo sapiens |
| 1151 | 11722940_a_at | turquoise | SLIT-ROBO Rho GTPase activating protein 2(SRGA2)                                                              | Homo sapiens |
| 1152 | 11722960_a_at | turquoise | cytochrome b561 family member D1(CYB561D1)                                                                    | Homo sapiens |
| 1153 | 11722964_a_at | turquoise | Alport syndrome, mental retardation, midface hypoplasia and elliptocytosis chromosomal region gene 1(AMMECR1) | Homo sapiens |
| 1154 | 11722979_a_at | turquoise | coagulation factor VIII(F8)                                                                                   | Homo sapiens |
| 1155 | 11722982_a_at | turquoise | lysosomal trafficking regulator(LYST)                                                                         | Homo sapiens |
| 1156 | 11723006_a_at | turquoise | S100 calcium binding protein A4(S100A4)                                                                       | Homo sapiens |
| 1157 | 11723010_a_at | turquoise | kinesin family member 20A(KIF20A)                                                                             | Homo sapiens |
| 1158 | 11723016_a_at | turquoise | histocompatibility minor 13(HM13)                                                                             | Homo sapiens |
| 1159 | 11723020_a_at | turquoise | receptor interacting serine/threonine kinase 3(RIPK3)                                                         | Homo sapiens |
| 1160 | 11723021_a_at | turquoise | branched chain keto acid dehydrogenase E1 subunit beta(BCKDHB)                                                | Homo sapiens |
| 1161 | 11723025_at   | turquoise | family with sequence similarity 26 member F(FAM26F)                                                           | Homo sapiens |
| 1162 | 11723026_at   | turquoise | family with sequence similarity 26 member F(FAM26F)                                                           | Homo sapiens |

|      |               |           |                                                                    |              |
|------|---------------|-----------|--------------------------------------------------------------------|--------------|
| 1164 | 11723048_at   | turquoise | C-X3-C motif chemokine receptor 1(CX3CR1)                          | Homo sapiens |
| 1165 | 11723050_a_at | turquoise | heat shock protein family A (Hsp70) member 6(HSPA6)                | Homo sapiens |
| 1168 | 11723058_a_at | turquoise | transporter 2, ATP binding cassette subfamily B member(TAP2)       | Homo sapiens |
| 1169 | 11723059_a_at | turquoise | transporter 2, ATP binding cassette subfamily B member(TAP2)       | Homo sapiens |
| 1170 | 11723060_at   | turquoise | Rab interacting lysosomal protein like 2(RILPL2)                   | Homo sapiens |
| 1171 | 11723061_s_at | turquoise | Rab interacting lysosomal protein like 2(RILPL2)                   | Homo sapiens |
| 1172 | 11723065_at   | turquoise | endonuclease G(ENDOG)                                              | Homo sapiens |
| 1173 | 11723069_at   | turquoise | ubiquitin D(UBD)                                                   | Homo sapiens |
| 1175 | 11723095_a_at | turquoise | CYLD lysine 63 deubiquitinase(CYLD)                                | Homo sapiens |
| 1176 | 11723096_a_at | turquoise | CYLD lysine 63 deubiquitinase(CYLD)                                | Homo sapiens |
| 1177 | 11723099_a_at | turquoise | carbonic anhydrase 14(CA14)                                        | Homo sapiens |
| 1178 | 11723100_at   | turquoise | carbonic anhydrase 14(CA14)                                        | Homo sapiens |
| 1179 | 11723105_at   | turquoise | cytidine/uridine monophosphate kinase 2(CMPK2)                     | Homo sapiens |
| 1180 | 11723106_a_at | turquoise | neutrophil cytosolic factor 4(NCF4)                                | Homo sapiens |
| 1181 | 11723110_at   | turquoise | pleckstrin homology domain containing B2(PLEKHB2)                  | Homo sapiens |
| 1182 | 11723116_a_at | turquoise | RAD51L3-RFFL readthrough(RAD51L3-RFFL)                             | Homo sapiens |
| 1183 | 11723134_a_at | turquoise | solute carrier family 22 member 17(SLC22A17)                       | Homo sapiens |
| 1184 | 11723144_at   | turquoise | sodium leak channel, non-selective(NALCN)                          | Homo sapiens |
| 1185 | 11723151_s_at | turquoise | succinyl-CoA:glutarate-CoA transferase(SUGCT)                      | Homo sapiens |
| 1186 | 11723156_a_at | turquoise | lymphocyte-specific protein 1(LSP1)                                | Homo sapiens |
| 1187 | 11723159_at   | turquoise | transmembrane protein 229B(TMEM229B)                               | Homo sapiens |
| 1188 | 11723169_s_at | turquoise | forkhead box N2(FOXP2)                                             | Homo sapiens |
| 1189 | 11723179_a_at | turquoise | intersectin 2(ITSN2)                                               | Homo sapiens |
| 1190 | 11723181_a_at | turquoise | mitogen-activated protein kinase 4(MAPK4)                          | Homo sapiens |
| 1191 | 11723182_at   | turquoise | CCR4-NOT transcription complex subunit 6 like(CNOT6L)              | Homo sapiens |
| 1192 | 11723183_s_at | turquoise | CCR4-NOT transcription complex subunit 6 like(CNOT6L)              | Homo sapiens |
| 1193 | 11723184_x_at | turquoise | CCR4-NOT transcription complex subunit 6 like(CNOT6L)              | Homo sapiens |
| 1194 | 11723185_s_at | turquoise | CCR4-NOT transcription complex subunit 6 like(CNOT6L)              | Homo sapiens |
| 1195 | 11723194_x_at | turquoise | major histocompatibility complex, class II, DQ beta 1(HLA-DQB1)    | Homo sapiens |
| 1196 | 11723195_x_at | turquoise | major histocompatibility complex, class I, E(HLA-E)                | Homo sapiens |
| 1197 | 11723197_at   | turquoise | heterogeneous nuclear ribonucleoprotein A3(HNRNPA3)                | Homo sapiens |
| 1198 | 11723198_s_at | turquoise | heterogeneous nuclear ribonucleoprotein A3 pseudogene 1(HNRNPA3P1) | Homo sapiens |
| 1199 | 11723199_s_at | turquoise | heterogeneous nuclear ribonucleoprotein A3 pseudogene 1(HNRNPA3P1) | Homo sapiens |
| 1200 | 11723217_x_at | turquoise | sideroflexin 3(SFXN3)                                              | Homo sapiens |
| 1201 | 11723230_a_at | turquoise | ring finger protein 138(RNF138)                                    | Homo sapiens |
| 1202 | 11723231_s_at | turquoise | ring finger protein 138 pseudogene 1(RNF138P1)                     | Homo sapiens |
| 1203 | 11723232_x_at | turquoise | ring finger protein 138(RNF138)                                    | Homo sapiens |
| 1204 | 11723243_at   | turquoise | cyclin dependent kinase 6(CDK6)                                    | Homo sapiens |
| 1205 | 11723262_at   | turquoise | antagonist of mitotic exit network 1 homolog(AMN1)                 | Homo sapiens |
| 1207 | 11723264_a_at | turquoise | CD3d molecule(CD3D)                                                | Homo sapiens |
| 1208 | 11723287_at   | turquoise | TYRO protein tyrosine kinase binding protein(TYROBP)               | Homo sapiens |
| 1209 | 11723292_at   | turquoise | ORAI calcium release-activated calcium modulator 1(ORAI1)          | Homo sapiens |
| 1210 | 11723310_at   | turquoise | TNF receptor superfamily member 10d(TNFRSF10D)                     | Homo sapiens |
| 1212 | 11723335_s_at | turquoise | GEM interacting protein(GMIP)                                      | Homo sapiens |
| 1213 | 11723346_at   | turquoise | LYL1, basic helix-loop-helix family member(LYL1)                   | Homo sapiens |
| 1214 | 11723372_a_at | turquoise | dedicator of cytokinesis 11(DOCK11)                                | Homo sapiens |
| 1215 | 11723378_a_at | turquoise | centriolin(CNTRL)                                                  | Homo sapiens |
| 1216 | 11723400_a_at | turquoise | serine/threonine kinase 4(STK4)                                    | Homo sapiens |
| 1217 | 11723401_x_at | turquoise | serine/threonine kinase 4(STK4)                                    | Homo sapiens |
| 1218 | 11723402_a_at | turquoise | serine/threonine kinase 4(STK4)                                    | Homo sapiens |
| 1220 | 11723408_a_at | turquoise | McKusick-Kaufman syndrome(MKKS)                                    | Homo sapiens |
| 1221 | 11723409_s_at | turquoise | McKusick-Kaufman syndrome(MKKS)                                    | Homo sapiens |
| 1222 | 11723419_a_at | turquoise | collagen type IX alpha 3 chain(COL9A3)                             | Homo sapiens |
| 1223 | 11723424_at   | turquoise | interferon alpha and beta receptor subunit 1(IFNAR1)               | Homo sapiens |
| 1224 | 11723425_at   | turquoise | interferon alpha and beta receptor subunit 1(IFNAR1)               | Homo sapiens |
| 1226 | 11723437_at   | turquoise | centrosomal protein 41(CEP41)                                      | Homo sapiens |
| 1227 | 11723447_at   | turquoise | mal, T-cell differentiation protein like(MALL)                     | Homo sapiens |
| 1228 | 11723448_x_at | turquoise | mal, T-cell differentiation protein like(MALL)                     | Homo sapiens |
| 1231 | 11723469_s_at | turquoise | lysophosphatidylglycerol acyltransferase 1(LPGAT1)                 | Homo sapiens |
| 1232 | 11723491_a_at | turquoise | Rho guanine nucleotide exchange factor 3(ARHGEF3)                  | Homo sapiens |
| 1233 | 11723492_a_at | turquoise | Rho guanine nucleotide exchange factor 3(ARHGEF3)                  | Homo sapiens |
| 1234 | 11723494_a_at | turquoise | ring finger protein 166(RNF166)                                    | Homo sapiens |
| 1235 | 11723516_a_at | turquoise | calcium binding protein 39 like(CAB39L)                            | Homo sapiens |
| 1236 | 11723534_at   | turquoise | breast cancer metastasis-suppressor 1-like(BRMS1L)                 | Homo sapiens |
| 1237 | 11723537_a_at | turquoise | Rho GTPase activating protein 45(ARHGAP45)                         | Homo sapiens |
| 1238 | 11723545_a_at | turquoise | phospholipase D1(PLD1)                                             | Homo sapiens |
| 1239 | 11723546_s_at | turquoise | phospholipase D1(PLD1)                                             | Homo sapiens |
| 1241 | 11723590_a_at | turquoise | tetratricopeptide repeat domain 13(TTC13)                          | Homo sapiens |
| 1242 | 11723591_at   | turquoise | leucine rich repeat containing 8 family member C(LRRC8C)           | Homo sapiens |
| 1243 | 11723592_at   | turquoise | leucine rich repeat containing 8 family member C(LRRC8C)           | Homo sapiens |
| 1244 | 11723604_a_at | turquoise | inositol polyphosphate-5-phosphatase J(INPP5J)                     | Homo sapiens |
| 1245 | 11723605_a_at | turquoise | PC-esterase domain containing 1B(PCED1B)                           | Homo sapiens |
| 1246 | 11723623_s_at | turquoise | tripartite motif containing 21(TRIM21)                             | Homo sapiens |
| 1247 | 11723638_at   | turquoise | chromosome 11 open reading frame 58(C11orf58)                      | Homo sapiens |
| 1248 | 11723639_s_at | turquoise | chromosome 11 open reading frame 58(C11orf58)                      | Homo sapiens |
| 1249 | 11723679_s_at | turquoise | CD69 molecule(CD69)                                                | Homo sapiens |
| 1250 | 11723689_at   | turquoise | cAMP responsive element binding protein like 2(CREBL2)             | Homo sapiens |
| 1251 | 11723690_at   | turquoise | cAMP responsive element binding protein like 2(CREBL2)             | Homo sapiens |
| 1253 | 11723697_s_at | turquoise | Fli-1 proto-oncogene, ETS transcription factor(FLI1)               | Homo sapiens |
| 1254 | 11723698_a_at | turquoise | 2'-5'-oligoadenylate synthetase 3(OAS3)                            | Homo sapiens |
| 1255 | 11723699_s_at | turquoise | 2'-5'-oligoadenylate synthetase 3(OAS3)                            | Homo sapiens |
| 1256 | 11723771_a_at | turquoise | microtubule associated serine/threonine kinase like(MASTL)         | Homo sapiens |

|      |               |           |                                                                              |              |
|------|---------------|-----------|------------------------------------------------------------------------------|--------------|
| 1257 | 11723795_a_at | turquoise | solute carrier family 29 member 2(SLC29A2)                                   | Homo sapiens |
| 1258 | 11723821_a_at | turquoise | SMAD specific E3 ubiquitin protein ligase 2(SMURF2)                          | Homo sapiens |
| 1259 | 11723826_a_at | turquoise | chromosome 2 open reading frame 88(C2orf88)                                  | Homo sapiens |
| 1260 | 11723847_a_at | turquoise | ATPase phospholipid transporting 11C(ATP11C)                                 | Homo sapiens |
| 1261 | 11723849_a_at | turquoise | membrane spanning 4-domains A6A(MS4A6A)                                      | Homo sapiens |
| 1262 | 11723850_a_at | turquoise | outer dense fiber of sperm tails 2 like(ODF2L)                               | Homo sapiens |
| 1263 | 11723851_x_at | turquoise | outer dense fiber of sperm tails 2 like(ODF2L)                               | Homo sapiens |
| 1264 | 11723853_a_at | turquoise | B-cell CLL/lymphoma 11A(BCL11A)                                              | Homo sapiens |
| 1265 | 11723854_a_at | turquoise | sterile alpha motif domain containing 9(SAMD9)                               | Homo sapiens |
| 1266 | 11723863_a_at | turquoise | dedicator of cytokinesis 10(DOCK10)                                          | Homo sapiens |
| 1267 | 11723871_a_at | turquoise | dedicator of cytokinesis 2(DOCK2)                                            | Homo sapiens |
| 1268 | 11723894_a_at | turquoise | telomerase associated protein 1(TEP1)                                        | Homo sapiens |
| 1269 | 11723895_a_at | turquoise | telomerase associated protein 1(TEP1)                                        | Homo sapiens |
| 1270 | 11723899_a_at | turquoise | dehydrogenase/reductase 9(DHRS9)                                             | Homo sapiens |
| 1271 | 11723902_at   | turquoise | pleckstrin homology and RhoGEF domain containing G1(PLEKHG1)                 | Homo sapiens |
| 1272 | 11723903_at   | turquoise | pleckstrin homology and RhoGEF domain containing G1(PLEKHG1)                 | Homo sapiens |
| 1273 | 11723910_a_at | turquoise | chemerin chemokine-like receptor 1(CMKLR1)                                   | Homo sapiens |
| 1274 | 11723946_a_at | turquoise | acyl-CoA synthetase long-chain family member 5(ACSL5)                        | Homo sapiens |
| 1275 | 11723947_a_at | turquoise | acyl-CoA synthetase long-chain family member 5(ACSL5)                        | Homo sapiens |
| 1276 | 11723964_a_at | turquoise | aspartylglucosaminidase(AGA)                                                 | Homo sapiens |
| 1277 | 11723973_at   | turquoise | carbohydrate sulfotransferase 12(CHST12)                                     | Homo sapiens |
| 1278 | 11723974_a_at | turquoise | apolipoprotein L3(APOL3)                                                     | Homo sapiens |
| 1279 | 11723975_x_at | turquoise | apolipoprotein L3(APOL3)                                                     | Homo sapiens |
| 1280 | 11723977_at   | turquoise | RAB3A, member RAS oncogene family(RAB3A)                                     | Homo sapiens |
| 1281 | 11723978_x_at | turquoise | RAB3A, member RAS oncogene family(RAB3A)                                     | Homo sapiens |
| 1282 | 11723979_s_at | turquoise | phosphorylase kinase regulatory subunit alpha 2(PHKA2)                       | Homo sapiens |
| 1283 | 11723991_a_at | turquoise | ALG6, alpha-1,3-glucosyltransferase(ALG6)                                    | Homo sapiens |
| 1284 | 11723995_a_at | turquoise | glucocorticoid induced 1(GLCC1)                                              | Homo sapiens |
| 1285 | 11723996_a_at | turquoise | glucocorticoid induced 1(GLCC1)                                              | Homo sapiens |
| 1286 | 11723997_a_at | turquoise | NFKB inhibitor interacting Ras like 1(NKIRAS1)                               | Homo sapiens |
| 1287 | 11724004_a_at | turquoise | FYN binding protein(FYB)                                                     | Homo sapiens |
| 1288 | 11724005_s_at | turquoise | FYN binding protein(FYB)                                                     | Homo sapiens |
| 1289 | 11724006_a_at | turquoise | ectonucleoside triphosphate diphosphohydrolase 1(ENTPD1)                     | Homo sapiens |
| 1290 | 11724008_a_at | turquoise | ectonucleoside triphosphate diphosphohydrolase 1(ENTPD1)                     | Homo sapiens |
| 1291 | 11724013_a_at | turquoise | sterol O-acyltransferase 1(SOAT1)                                            | Homo sapiens |
| 1292 | 11724014_a_at | turquoise | sterol O-acyltransferase 1(SOAT1)                                            | Homo sapiens |
| 1293 | 11724033_s_at | turquoise | CD2 associated protein(CD2AP)                                                | Homo sapiens |
| 1294 | 11724037_at   | turquoise | prostaglandin-endoperoxide synthase 2(PTGS2)                                 | Homo sapiens |
| 1295 | 11724058_x_at | turquoise | ceramide-1-phosphate transfer protein(CPTP)                                  | Homo sapiens |
| 1296 | 11724061_s_at | turquoise | oxysterol binding protein like 1A(OSBPL1A)                                   | Homo sapiens |
| 1297 | 11724082_x_at | turquoise | torsin family 2 member A(TOR2A)                                              | Homo sapiens |
| 1298 | 11724102_s_at | turquoise | PDZ domain containing ring finger 3(PDZRN3)                                  | Homo sapiens |
| 1299 | 11724103_x_at | turquoise | C8orf44-SGK3 readthrough(C8orf44-SGK3)                                       | Homo sapiens |
| 1300 | 11724104_s_at | turquoise | C8orf44-SGK3 readthrough(C8orf44-SGK3)                                       | Homo sapiens |
| 1301 | 11724106_a_at | turquoise | basic leucine zipper ATF-like transcription factor 2(BATF2)                  | Homo sapiens |
| 1302 | 11724117_x_at | turquoise | sterile alpha motif domain containing 9 like(SAMD9L)                         | Homo sapiens |
| 1303 | 11724118_a_at | turquoise | sterile alpha motif domain containing 9 like(SAMD9L)                         | Homo sapiens |
| 1304 | 11724119_at   | turquoise | sterile alpha motif domain containing 9 like(SAMD9L)                         | Homo sapiens |
| 1305 | 11724145_a_at | turquoise | solute carrier family 37 member 1(SLC37A1)                                   | Homo sapiens |
| 1306 | 11724149_a_at | turquoise | src kinase associated phosphoprotein 1(SKAP1)                                | Homo sapiens |
| 1307 | 11724159_x_at | turquoise | endothelial cell surface expressed chemotaxis and apoptosis regulator(ECSCR) | Homo sapiens |
| 1308 | 11724163_at   | turquoise | major histocompatibility complex, class II, DO beta(HLA-DOB)                 | Homo sapiens |
| 1309 | 11724166_a_at | turquoise | collagen beta(1-O)galactosyltransferase 2(COLGALT2)                          | Homo sapiens |
| 1310 | 11724167_s_at | turquoise | collagen beta(1-O)galactosyltransferase 2(COLGALT2)                          | Homo sapiens |
| 1311 | 11724172_s_at | turquoise | FCH domain only 2(FCHO2)                                                     | Homo sapiens |
| 1312 | 11724188_x_at | turquoise | poly(ADP-ribose) polymerase family member 10(PARP10)                         | Homo sapiens |
| 1313 | 11724192_at   | turquoise | COP9 signalosome subunit 2(COPS2)                                            | Homo sapiens |
| 1314 | 11724201_a_at | turquoise | transmembrane protein 143(TMEM143)                                           | Homo sapiens |
| 1315 | 11724214_a_at | turquoise | SPRY domain containing 4(SPRY4)                                              | Homo sapiens |
| 1316 | 11724224_a_at | turquoise | adenosine monophosphate deaminase 2(AMPD2)                                   | Homo sapiens |
| 1317 | 11724226_at   | turquoise | microRNA 6748(MIR6748)                                                       | Homo sapiens |
| 1318 | 11724236_a_at | turquoise | receptor interacting serine/threonine kinase 2(RIPK2)                        | Homo sapiens |
| 1319 | 11724237_a_at | turquoise | linker for activation of T-cells family member 2(LAT2)                       | Homo sapiens |
| 1320 | 11724255_a_at | turquoise | 2'-5'-oligoadenylate synthetase 1(OAS1)                                      | Homo sapiens |
| 1321 | 11724256_s_at | turquoise | 2'-5'-oligoadenylate synthetase 1(OAS1)                                      | Homo sapiens |
| 1323 | 11724271_a_at | turquoise | HLF, PAR bZIP transcription factor(HLF)                                      | Homo sapiens |
| 1324 | 11724272_at   | turquoise | HLF, PAR bZIP transcription factor(HLF)                                      | Homo sapiens |
| 1325 | 11724296_a_at | turquoise | bone morphogenetic protein 7(BMP7)                                           | Homo sapiens |
| 1326 | 11724297_a_at | turquoise | bone morphogenetic protein 7(BMP7)                                           | Homo sapiens |
| 1327 | 11724310_a_at | turquoise | SH3 domain binding protein 2(SH3BP2)                                         | Homo sapiens |
| 1328 | 11724311_a_at | turquoise | SH3 domain binding protein 2(SH3BP2)                                         | Homo sapiens |
| 1329 | 11724312_a_at | turquoise | SH3 domain binding protein 2(SH3BP2)                                         | Homo sapiens |
| 1330 | 11724326_a_at | turquoise | Rho GTPase activating protein 25(ARHGAP25)                                   | Homo sapiens |
| 1331 | 11724328_a_at | turquoise | ubiquitin conjugating enzyme E2 C(UBE2C)                                     | Homo sapiens |
| 1332 | 11724343_at   | turquoise | integrin subunit alpha 4(ITGA4)                                              | Homo sapiens |
| 1333 | 11724344_a_at | turquoise | integrin subunit alpha 4(ITGA4)                                              | Homo sapiens |
| 1334 | 11724345_at   | turquoise | integrin subunit alpha 4(ITGA4)                                              | Homo sapiens |
| 1335 | 11724346_a_at | turquoise | interferon induced with helicase C domain 1(IFIH1)                           | Homo sapiens |
| 1336 | 11724347_a_at | turquoise | astrotactin 2(ASTN2)                                                         | Homo sapiens |
| 1337 | 11724348_s_at | turquoise | astrotactin 2(ASTN2)                                                         | Homo sapiens |
| 1339 | 11724354_x_at | turquoise | autophagy related 16 like 2(ATG16L2)                                         | Homo sapiens |
| 1341 | 11724357_a_at | turquoise | myosin VA(MYO5A)                                                             | Homo sapiens |

|      |               |           |                                                                                      |              |
|------|---------------|-----------|--------------------------------------------------------------------------------------|--------------|
| 1342 | 11724358_s_at | turquoise | myosin VA(MYO5A)                                                                     | Homo sapiens |
| 1343 | 11724360_s_at | turquoise | beta-transducin repeat containing E3 ubiquitin protein ligase(BTRC)                  | Homo sapiens |
| 1344 | 11724361_s_at | turquoise | phosphoinositide kinase, FYVE-type zinc finger containing(PIKFYVE)                   | Homo sapiens |
| 1345 | 11724374_at   | turquoise | basic leucine zipper ATF-like transcription factor(BATF)                             | Homo sapiens |
| 1346 | 11724375_at   | turquoise | phosphoprotein membrane anchor with glycosphingolipid microdomains 1(PAG1)           | Homo sapiens |
| 1347 | 11724377_at   | turquoise | phosphoprotein membrane anchor with glycosphingolipid microdomains 1(PAG1)           | Homo sapiens |
| 1348 | 11724378_s_at | turquoise | phosphoprotein membrane anchor with glycosphingolipid microdomains 1(PAG1)           | Homo sapiens |
| 1349 | 11724381_s_at | turquoise | family with sequence similarity 65 member B(FAM65B)                                  | Homo sapiens |
| 1350 | 11724391_at   | turquoise | aspartate beta-hydroxylase domain containing 2(ASPHD2)                               | Homo sapiens |
| 1351 | 11724392_at   | turquoise | aspartate beta-hydroxylase domain containing 2(ASPHD2)                               | Homo sapiens |
| 1352 | 11724399_a_at | turquoise | DEAD-box helicase 60-like(DDX60L)                                                    | Homo sapiens |
| 1353 | 11724404_a_at | turquoise | Wilms tumor 1 associated protein(WTAP)                                               | Homo sapiens |
| 1354 | 11724424_at   | turquoise | G protein-coupled receptor 68(GPR68)                                                 | Homo sapiens |
| 1355 | 11724432_x_at | turquoise | trafficking protein particle complex 2(TRAPPC2)                                      | Homo sapiens |
| 1356 | 11724435_a_at | turquoise | thiamin pyrophosphokinase 1(TPK1)                                                    | Homo sapiens |
| 1357 | 11724465_a_at | turquoise | anillin actin binding protein(ANLN)                                                  | Homo sapiens |
| 1358 | 11724485_x_at | turquoise | c-src tyrosine kinase(CSK)                                                           | Homo sapiens |
| 1359 | 11724499_at   | turquoise | MFNG O-fucosylpeptide 3-beta-N-acetylglucosaminyltransferase(MFNG)                   | Homo sapiens |
| 1360 | 11724509_a_at | turquoise | phorbol-12-myristate-13-acetate-induced protein 1(PMAIP1)                            | Homo sapiens |
| 1361 | 11724510_at   | turquoise | phorbol-12-myristate-13-acetate-induced protein 1(PMAIP1)                            | Homo sapiens |
| 1362 | 11724559_at   | turquoise | G protein subunit alpha 15(GNA15)                                                    | Homo sapiens |
| 1363 | 11724565_at   | turquoise | talin 2(TLN2)                                                                        | Homo sapiens |
| 1365 | 11724595_at   | turquoise | retinitis pigmentosa 2 (X-linked recessive)(RP2)                                     | Homo sapiens |
| 1366 | 11724596_s_at | turquoise | TRAF family member associated NFKB activator(TANK)                                   | Homo sapiens |
| 1367 | 11724601_s_at | turquoise | endoplasmic reticulum aminopeptidase 1(ERAP1)                                        | Homo sapiens |
| 1368 | 11724602_a_at | turquoise | endoplasmic reticulum aminopeptidase 1(ERAP1)                                        | Homo sapiens |
| 1369 | 11724640_a_at | turquoise | Rho GTPase activating protein 44(ARHGAP44)                                           | Homo sapiens |
| 1370 | 11724656_a_at | turquoise | mitogen-activated protein kinase kinase kinase kinase 1(MAP4K1)                      | Homo sapiens |
| 1372 | 11724673_a_at | turquoise | branched chain keto acid dehydrogenase E1 subunit beta(BCKDHB)                       | Homo sapiens |
| 1373 | 11724678_a_at | turquoise | lymphocyte antigen 86(LY86)                                                          | Homo sapiens |
| 1374 | 11724682_s_at | turquoise | transforming growth factor beta receptor 2(TGFB2)                                    | Homo sapiens |
| 1375 | 11724683_a_at | turquoise | CD300a molecule(CD300A)                                                              | Homo sapiens |
| 1376 | 11724685_x_at | turquoise | interferon alpha and beta receptor subunit 2(IFNAR2)                                 | Homo sapiens |
| 1377 | 11724686_x_at | turquoise | interferon alpha and beta receptor subunit 2(IFNAR2)                                 | Homo sapiens |
| 1378 | 11724701_x_at | turquoise | BORCS7-ASMT readthrough (NMD candidate)(BORCS7-ASMT)                                 | Homo sapiens |
| 1379 | 11724728_a_at | turquoise | CD8a molecule(CD8A)                                                                  | Homo sapiens |
| 1380 | 11724729_a_at | turquoise | CD8a molecule(CD8A)                                                                  | Homo sapiens |
| 1381 | 11724732_s_at | turquoise | tubulin beta class I(TUBB)                                                           | Homo sapiens |
| 1383 | 11724766_a_at | turquoise | FAST kinase domains 2(FASTKD2)                                                       | Homo sapiens |
| 1384 | 11724768_s_at | turquoise | Fc fragment of IgG receptor IIa(FCGR2A)                                              | Homo sapiens |
| 1385 | 11724769_x_at | turquoise | Fc fragment of IgG receptor IIa(FCGR2A)                                              | Homo sapiens |
| 1386 | 11724770_s_at | turquoise | Fc fragment of IgG receptor IIa(FCGR2A)                                              | Homo sapiens |
| 1387 | 11724771_x_at | turquoise | Fc fragment of IgG receptor IIa(FCGR2A)                                              | Homo sapiens |
| 1388 | 11724775_at   | turquoise | ferredoxin 1(FDX1)                                                                   | Homo sapiens |
| 1389 | 11724776_at   | turquoise | phosphoglucomutase 2 like 1(PGM2L1)                                                  | Homo sapiens |
| 1391 | 11724793_s_at | turquoise | phosphatidylglycerophosphate synthase 1(PGS1)                                        | Homo sapiens |
| 1392 | 11724799_x_at | turquoise | major histocompatibility complex, class II, DQ alpha 1(HLA-DQA1)                     | Homo sapiens |
| 1393 | 11724800_a_at | turquoise | quinolinate phosphoribosyltransferase(QPRT)                                          | Homo sapiens |
| 1394 | 11724804_x_at | turquoise | leukocyte associated immunoglobulin like receptor 1(LAIR1)                           | Homo sapiens |
| 1395 | 11724805_a_at | turquoise | leukocyte associated immunoglobulin like receptor 1(LAIR1)                           | Homo sapiens |
| 1396 | 11724807_at   | turquoise | Cbl proto-oncogene(CBL)                                                              | Homo sapiens |
| 1397 | 11724810_at   | turquoise | Cbl proto-oncogene(CBL)                                                              | Homo sapiens |
| 1398 | 11724817_a_at | turquoise | SH3 domain containing kinase binding protein 1(SH3KBP1)                              | Homo sapiens |
| 1399 | 11724820_a_at | turquoise | NIMA related kinase 6(NEK6)                                                          | Homo sapiens |
| 1400 | 11724821_a_at | turquoise | NIMA related kinase 6(NEK6)                                                          | Homo sapiens |
| 1401 | 11724844_s_at | turquoise | abhydrolase domain containing 17A(ABHD17A)                                           | Homo sapiens |
| 1402 | 11724851_a_at | turquoise | syntaxin binding protein 6(STXB6)                                                    | Homo sapiens |
| 1403 | 11724853_at   | turquoise | LDL receptor related protein 3(LRP3)                                                 | Homo sapiens |
| 1404 | 11724857_s_at | turquoise | centrosomal protein 63(CEP63)                                                        | Homo sapiens |
| 1405 | 11724862_at   | turquoise | threonine synthase like 1(THNSL1)                                                    | Homo sapiens |
| 1406 | 11724881_at   | turquoise | zinc finger protein 217(ZNF217)                                                      | Homo sapiens |
| 1407 | 11724883_a_at | turquoise | hyaluronan and proteoglycan link protein 3(HAPLN3)                                   | Homo sapiens |
| 1408 | 11724884_x_at | turquoise | hyaluronan and proteoglycan link protein 3(HAPLN3)                                   | Homo sapiens |
| 1409 | 11724900_a_at | turquoise | granzyme B(GZMB)                                                                     | Homo sapiens |
| 1410 | 11724904_at   | turquoise | TIMP metalloproteinase inhibitor 4(TIMP4)                                            | Homo sapiens |
| 1411 | 11724908_a_at | turquoise | dynein cytoplasmic 1 intermediate chain 1(DYNC11)                                    | Homo sapiens |
| 1412 | 11724921_x_at | turquoise | vacuolar protein sorting 13 homolog B(VPS13B)                                        | Homo sapiens |
| 1413 | 11724944_at   | turquoise | calsyntenin 2(CLSTN2)                                                                | Homo sapiens |
| 1414 | 11724947_a_at | turquoise | membrane associated guanylate kinase, WW and PDZ domain containing 2(MAGI2)          | Homo sapiens |
| 1415 | 11724954_s_at | turquoise | mannose receptor, C type 1(MRC1)                                                     | Homo sapiens |
| 1416 | 11724958_at   | turquoise | 5',3'-nucleotidase, mitochondrial(NT5M)                                              | Homo sapiens |
| 1417 | 11724963_s_at | turquoise | F-box protein 5(FBXO5)                                                               | Homo sapiens |
| 1418 | 11724979_a_at | turquoise | dipeptidase 2(DPEP2)                                                                 | Homo sapiens |
| 1419 | 11724997_a_at | turquoise | CD86 molecule(CD86)                                                                  | Homo sapiens |
| 1420 | 11724998_a_at | turquoise | CD86 molecule(CD86)                                                                  | Homo sapiens |
| 1421 | 11725011_a_at | turquoise | centrosomal protein 78(CEP78)                                                        | Homo sapiens |
| 1422 | 11725013_at   | turquoise | methylmalonic aciduria (cobalamin deficiency) cblC type, with homocystinuria(MMACHC) | Homo sapiens |
| 1423 | 11725042_a_at | turquoise | tyrosine 3-monooxygenase/tryptophan 5-monooxygenase activation protein beta(YWHAB)   | Homo sapiens |
| 1424 | 11725044_s_at | turquoise | tyrosine 3-monooxygenase/tryptophan 5-monooxygenase activation protein beta(YWHAB)   | Homo sapiens |
| 1426 | 11725091_at   | turquoise | regulatory factor X5(RFX5)                                                           | Homo sapiens |
| 1427 | 11725092_s_at | turquoise | regulatory factor X5(RFX5)                                                           | Homo sapiens |
| 1428 | 11725093_a_at | turquoise | regulatory factor X5(RFX5)                                                           | Homo sapiens |

|      |               |           |                                                                                           |              |
|------|---------------|-----------|-------------------------------------------------------------------------------------------|--------------|
| 1429 | 11725095_at   | turquoise | tetratricopeptide repeat domain 33(TTC33)                                                 | Homo sapiens |
| 1430 | 11725110_a_at | turquoise | nudE neurodevelopment protein 1(NDE1)                                                     | Homo sapiens |
| 1431 | 11725124_at   | turquoise | cystatin F(CST7)                                                                          | Homo sapiens |
| 1432 | 11725135_a_at | turquoise | VPS16, CORVET/HOPS core subunit(VPS16)                                                    | Homo sapiens |
| 1434 | 11725144_a_at | turquoise | zinc finger protein 784(ZNF784)                                                           | Homo sapiens |
| 1435 | 11725153_a_at | turquoise | nuclear factor kappa B subunit 2(NFKB2)                                                   | Homo sapiens |
| 1436 | 11725155_at   | turquoise | four jointed box 1(FJX1)                                                                  | Homo sapiens |
| 1437 | 11725174_a_at | turquoise | ArfGAP with dual PH domains 2(ADAP2)                                                      | Homo sapiens |
| 1438 | 11725175_x_at | turquoise | ArfGAP with dual PH domains 2(ADAP2)                                                      | Homo sapiens |
| 1439 | 11725180_a_at | turquoise | runt related transcription factor 2(RUNX2)                                                | Homo sapiens |
| 1440 | 11725228_a_at | turquoise | pyrimidinergic receptor P2Y6(P2RY6)                                                       | Homo sapiens |
| 1441 | 11725232_at   | turquoise | ATPase phospholipid transporting 8B2(ATP8B2)                                              | Homo sapiens |
| 1443 | 11725238_a_at | turquoise | RNA binding protein with multiple splicing 2(RBPMS2)                                      | Homo sapiens |
| 1444 | 11725240_at   | turquoise | receptor transporter protein 4(RTP4)                                                      | Homo sapiens |
| 1445 | 11725249_at   | turquoise | lymphocyte antigen 75(LY75)                                                               | Homo sapiens |
| 1446 | 11725255_a_at | turquoise | interleukin 15(IL15)                                                                      | Homo sapiens |
| 1447 | 11725280_a_at | turquoise | PR/SET domain 8(PRDM8)                                                                    | Homo sapiens |
| 1448 | 11725315_x_at | turquoise | PRELI domain containing 1(PRELID1)                                                        | Homo sapiens |
| 1449 | 11725351_x_at | turquoise | KIAA0930(KIAA0930)                                                                        | Homo sapiens |
| 1450 | 11725352_a_at | turquoise | KIAA0930(KIAA0930)                                                                        | Homo sapiens |
| 1451 | 11725373_a_at | turquoise | TNFRSF1A associated via death domain(TRADD)                                               | Homo sapiens |
| 1452 | 11725379_at   | turquoise | protein O-glucosyltransferase 1(POGLUT1)                                                  | Homo sapiens |
| 1453 | 11725380_at   | turquoise | protein O-glucosyltransferase 1(POGLUT1)                                                  | Homo sapiens |
| 1454 | 11725385_at   | turquoise | UDP-glucose ceramide glucosyltransferase(UGCG)                                            | Homo sapiens |
| 1455 | 11725389_a_at | turquoise | CD6 molecule(CD6)                                                                         | Homo sapiens |
| 1456 | 11725403_at   | turquoise | transmembrane 4 L six family member 18(TM4SF18)                                           | Homo sapiens |
| 1457 | 11725412_s_at | turquoise | tripartite motif containing 14(TRIM14)                                                    | Homo sapiens |
| 1458 | 11725413_x_at | turquoise | tripartite motif containing 14(TRIM14)                                                    | Homo sapiens |
| 1459 | 11725416_at   | turquoise | natural killer cell granule protein 7(NKG7)                                               | Homo sapiens |
| 1460 | 11725419_a_at | turquoise | lysophosphatidylcholine acyltransferase 2(LPCAT2)                                         | Homo sapiens |
| 1461 | 11725424_a_at | turquoise | RAB27A, member RAS oncogene family(RAB27A)                                                | Homo sapiens |
| 1462 | 11725425_s_at | turquoise | RAB27A, member RAS oncogene family(RAB27A)                                                | Homo sapiens |
| 1463 | 11725426_a_at | turquoise | RAB27A, member RAS oncogene family(RAB27A)                                                | Homo sapiens |
| 1464 | 11725429_at   | turquoise | lysosomal associated membrane protein 3(LAMP3)                                            | Homo sapiens |
| 1465 | 11725437_x_at | turquoise | SPRY domain containing 7(SPRY7)                                                           | Homo sapiens |
| 1466 | 11725440_a_at | turquoise | lysophosphatidic acid receptor 2(LPAR2)                                                   | Homo sapiens |
| 1467 | 11725444_at   | turquoise | C-C motif chemokine receptor 1(CCR1)                                                      | Homo sapiens |
| 1468 | 11725445_x_at | turquoise | microRNA 8085(MIR8085)                                                                    | Homo sapiens |
| 1469 | 11725448_at   | turquoise | folliculin(FLCN)                                                                          | Homo sapiens |
| 1470 | 11725455_at   | turquoise | CD247 molecule(CD247)                                                                     | Homo sapiens |
| 1471 | 11725471_a_at | turquoise | mannosidase alpha class 2A member 1(MAN2A1)                                               | Homo sapiens |
| 1472 | 11725472_a_at | turquoise | progesterin and adipoQ receptor family member 8(PAQR8)                                    | Homo sapiens |
| 1473 | 11725473_a_at | turquoise | progesterin and adipoQ receptor family member 8(PAQR8)                                    | Homo sapiens |
| 1474 | 11725476_at   | turquoise | ArfGAP with coiled-coil, ankyrin repeat and PH domains 1(ACAP1)                           | Homo sapiens |
| 1475 | 11725481_a_at | turquoise | CD27 molecule(CD27)                                                                       | Homo sapiens |
| 1476 | 11725485_at   | turquoise | disrupted in renal carcinoma 2(DIRC2)                                                     | Homo sapiens |
| 1477 | 11725492_at   | turquoise | RAB20, member RAS oncogene family(RAB20)                                                  | Homo sapiens |
| 1478 | 11725498_a_at | turquoise | transmembrane protein 117(TMEM117)                                                        | Homo sapiens |
| 1479 | 11725522_at   | turquoise | mesoderm posterior bHLH transcription factor 1(MESP1)                                     | Homo sapiens |
| 1480 | 11725523_at   | turquoise | desmoglein 2(DSG2)                                                                        | Homo sapiens |
| 1481 | 11725524_s_at | turquoise | desmoglein 2(DSG2)                                                                        | Homo sapiens |
| 1483 | 11725537_at   | turquoise | zinc and ring finger 3(ZNRF3)                                                             | Homo sapiens |
| 1487 | 11725617_s_at | turquoise | heterogeneous nuclear ribonucleoprotein R(HNRNPR)                                         | Homo sapiens |
| 1489 | 11725629_s_at | turquoise | 2',3'-cyclic nucleotide 3' phosphodiesterase(CNP)                                         | Homo sapiens |
| 1490 | 11725634_at   | turquoise | mitochondrial ribosomal protein S25(MRPS25)                                               | Homo sapiens |
| 1492 | 11725636_a_at | turquoise | MOB kinase activator 1A(MOB1A)                                                            | Homo sapiens |
| 1493 | 11725641_at   | turquoise | EF-hand domain family member D2(EFHD2)                                                    | Homo sapiens |
| 1494 | 11725642_at   | turquoise | EF-hand domain family member D2(EFHD2)                                                    | Homo sapiens |
| 1496 | 11725650_s_at | turquoise | DDB1 and CUL4 associated factor 5(DCAF5)                                                  | Homo sapiens |
| 1497 | 11725657_a_at | turquoise | zinc finger with UFM1 specific peptidase domain(ZUFSP)                                    | Homo sapiens |
| 1499 | 11725683_at   | turquoise | MRS2, magnesium transporter(MRS2)                                                         | Homo sapiens |
| 1500 | 11725684_a_at | turquoise | protein tyrosine phosphatase, receptor type O(PTPRO)                                      | Homo sapiens |
| 1501 | 11725685_a_at | turquoise | protein tyrosine phosphatase, receptor type O(PTPRO)                                      | Homo sapiens |
| 1502 | 11725697_at   | turquoise | tripartite motif containing 56(TRIM56)                                                    | Homo sapiens |
| 1503 | 11725712_s_at | turquoise | peptidyl-prolyl cis-trans isomerase A pseudogene(LOC101060363)                            | Homo sapiens |
| 1504 | 11725729_s_at | turquoise | chromosome 1 open reading frame 56(C1orf56)                                               | Homo sapiens |
| 1505 | 11725746_a_at | turquoise | phosphatidylinositol transfer protein, cytoplasmic 1(PITPNC1)                             | Homo sapiens |
| 1506 | 11725755_a_at | turquoise | butyrophilin subfamily 2 member A2(BTN2A2)                                                | Homo sapiens |
| 1507 | 11725782_at   | turquoise | annexin A2 receptor(ANXA2R)                                                               | Homo sapiens |
| 1508 | 11725789_at   | turquoise | dihydropyrimidine dehydrogenase(DPYD)                                                     | Homo sapiens |
| 1509 | 11725790_at   | turquoise | dihydropyrimidine dehydrogenase(DPYD)                                                     | Homo sapiens |
| 1510 | 11725793_s_at | turquoise | prostaglandin E receptor 4(PTGER4)                                                        | Homo sapiens |
| 1511 | 11725794_at   | turquoise | prostaglandin E receptor 4(PTGER4)                                                        | Homo sapiens |
| 1512 | 11725803_a_at | turquoise | chromosome 21 open reading frame 91(C21orf91)                                             | Homo sapiens |
| 1513 | 11725804_a_at | turquoise | chromosome 21 open reading frame 91(C21orf91)                                             | Homo sapiens |
| 1514 | 11725811_at   | turquoise | phospholipase A2 group V(PLA2G5)                                                          | Homo sapiens |
| 1515 | 11725813_at   | turquoise | microtubule associated serine/threonine kinase 3(MAST3)                                   | Homo sapiens |
| 1516 | 11725842_a_at | turquoise | PIF1 5'-to-3' DNA helicase(PIF1)                                                          | Homo sapiens |
| 1517 | 11725856_a_at | turquoise | dynein axonemal heavy chain 1(DNAH1)                                                      | Homo sapiens |
| 1518 | 11725861_a_at | turquoise | MYB proto-oncogene like 1(MYBL1)                                                          | Homo sapiens |
| 1519 | 11725876_at   | turquoise | glycosylphosphatidylinositol anchored high density lipoprotein binding protein 1(GPIHBP1) | Homo sapiens |
| 1520 | 11725887_at   | turquoise | family with sequence similarity 167 member B(FAM167B)                                     | Homo sapiens |



|      |               |           |                                                                                       |              |
|------|---------------|-----------|---------------------------------------------------------------------------------------|--------------|
| 1522 | 11725899_a_at | turquoise | leucine rich repeat containing 8 family member D(LRRC8D)                              | Homo sapiens |
| 1523 | 11725910_a_at | turquoise | collagen type IV alpha 6 chain(COL4A6)                                                | Homo sapiens |
| 1524 | 11725912_a_at | turquoise | erb-b2 receptor tyrosine kinase 4(ERBB4)                                              | Homo sapiens |
| 1525 | 11725917_s_at | turquoise | ring finger protein 19B(RNF19B)                                                       | Homo sapiens |
| 1526 | 11725924_a_at | turquoise | Ras association domain family member 5(RASSF5)                                        | Homo sapiens |
| 1527 | 11725935_at   | turquoise | calcium/calmodulin dependent protein kinase II alpha(CAMK2A)                          | Homo sapiens |
| 1529 | 11725966_a_at | turquoise | integrin subunit beta 7(ITGB7)                                                        | Homo sapiens |
| 1530 | 11725970_x_at | turquoise | heterogeneous nuclear ribonucleoprotein F(HNRNPF)                                     | Homo sapiens |
| 1531 | 11725971_a_at | turquoise | heterogeneous nuclear ribonucleoprotein F(HNRNPF)                                     | Homo sapiens |
| 1532 | 11725972_s_at | turquoise | heterogeneous nuclear ribonucleoprotein F(HNRNPF)                                     | Homo sapiens |
| 1533 | 11725973_x_at | turquoise | heterogeneous nuclear ribonucleoprotein F(HNRNPF)                                     | Homo sapiens |
| 1534 | 11725981_at   | turquoise | C-C motif chemokine receptor 7(CCR7)                                                  | Homo sapiens |
| 1535 | 11725983_at   | turquoise | basic helix-loop-helix family member e40(BHLHE40)                                     | Homo sapiens |
| 1537 | 11725998_a_at | turquoise | Fas cell surface death receptor(FAS)                                                  | Homo sapiens |
| 1538 | 11725999_s_at | turquoise | Fas cell surface death receptor(FAS)                                                  | Homo sapiens |
| 1539 | 11726000_x_at | turquoise | copine 4(CPNE4)                                                                       | Homo sapiens |
| 1540 | 11726004_a_at | turquoise | layilin(LAYN)                                                                         | Homo sapiens |
| 1541 | 11726034_a_at | turquoise | protein tyrosine phosphatase, non-receptor type 6(PTPN6)                              | Homo sapiens |
| 1543 | 11726040_at   | turquoise | serine/threonine kinase 17b(STK17B)                                                   | Homo sapiens |
| 1544 | 11726041_x_at | turquoise | serine/threonine kinase 17b(STK17B)                                                   | Homo sapiens |
| 1545 | 11726042_a_at | turquoise | serine/threonine kinase 17b(STK17B)                                                   | Homo sapiens |
| 1546 | 11726056_a_at | turquoise | protein phosphatase 4 regulatory subunit 3B(PPP4R3B)                                  | Homo sapiens |
| 1548 | 11726088_s_at | turquoise | phosphatase and actin regulator 3(PHACTR3)                                            | Homo sapiens |
| 1549 | 11726089_at   | turquoise | VPS53, GARP complex subunit(VPS53)                                                    | Homo sapiens |
| 1551 | 11726120_a_at | turquoise | BMP2 inducible kinase(BMP2K)                                                          | Homo sapiens |
| 1552 | 11726122_at   | turquoise | myosin IF(MYO1F)                                                                      | Homo sapiens |
| 1554 | 11726158_at   | turquoise | spindlin family member 4(SPIN4)                                                       | Homo sapiens |
| 1555 | 11726168_at   | turquoise | progesterone receptor(PGR)                                                            | Homo sapiens |
| 1556 | 11726178_a_at | turquoise | SRY-box 6(SOX6)                                                                       | Homo sapiens |
| 1557 | 11726179_a_at | turquoise | SRY-box 6(SOX6)                                                                       | Homo sapiens |
| 1558 | 11726180_a_at | turquoise | SRY-box 6(SOX6)                                                                       | Homo sapiens |
| 1559 | 11726187_at   | turquoise | shisa family member 3(SHISA3)                                                         | Homo sapiens |
| 1560 | 11726188_at   | turquoise | shisa family member 3(SHISA3)                                                         | Homo sapiens |
| 1561 | 11726190_a_at | turquoise | dedicator of cytokinesis 4(DOCK4)                                                     | Homo sapiens |
| 1562 | 11726201_a_at | turquoise | 2'-5'-oligoadenylate synthetase 2(OAS2)                                               | Homo sapiens |
| 1563 | 11726217_a_at | turquoise | PR/SET domain 1(PRDM1)                                                                | Homo sapiens |
| 1564 | 11726218_a_at | turquoise | PR/SET domain 1(PRDM1)                                                                | Homo sapiens |
| 1565 | 11726242_a_at | turquoise | transketolase like 1(TKTL1)                                                           | Homo sapiens |
| 1566 | 11726254_s_at | turquoise | CD74 molecule(CD74)                                                                   | Homo sapiens |
| 1567 | 11726255_x_at | turquoise | CD74 molecule(CD74)                                                                   | Homo sapiens |
| 1569 | 11726286_a_at | turquoise | tryptophanyl-tRNA synthetase(WARS)                                                    | Homo sapiens |
| 1570 | 11726287_a_at | turquoise | tryptophanyl-tRNA synthetase(WARS)                                                    | Homo sapiens |
| 1571 | 11726292_s_at | turquoise | WD repeat domain 44(WDR44)                                                            | Homo sapiens |
| 1572 | 11726293_x_at | turquoise | WD repeat domain 44(WDR44)                                                            | Homo sapiens |
| 1573 | 11726294_s_at | turquoise | CCAAT/enhancer binding protein alpha(CEBPA)                                           | Homo sapiens |
| 1574 | 11726309_a_at | turquoise | glycine receptor beta(GLRB)                                                           | Homo sapiens |
| 1575 | 11726310_at   | turquoise | glycine receptor beta(GLRB)                                                           | Homo sapiens |
| 1576 | 11726311_at   | turquoise | glycine receptor beta(GLRB)                                                           | Homo sapiens |
| 1577 | 11726315_a_at | turquoise | methyltransferase like 22(METTL22)                                                    | Homo sapiens |
| 1578 | 11726316_at   | turquoise | selectin E(SELE)                                                                      | Homo sapiens |
| 1579 | 11726321_a_at | turquoise | endoplasmic reticulum oxidoreductase 1 alpha(ERO1A)                                   | Homo sapiens |
| 1580 | 11726324_at   | turquoise | cytokine receptor like factor 3(CRLF3)                                                | Homo sapiens |
| 1581 | 11726328_x_at | turquoise | guanylate binding protein 1(GBP1)                                                     | Homo sapiens |
| 1582 | 11726329_x_at | turquoise | guanylate binding protein 1(GBP1)                                                     | Homo sapiens |
| 1583 | 11726333_s_at | turquoise | lymphoid enhancer binding factor 1(LEF1)                                              | Homo sapiens |
| 1585 | 11726337_a_at | turquoise | arachidonate 5-lipoxygenase(ALOX5)                                                    | Homo sapiens |
| 1586 | 11726338_a_at | turquoise | arachidonate 5-lipoxygenase(ALOX5)                                                    | Homo sapiens |
| 1587 | 11726347_x_at | turquoise | linker for activation of T-cells family member 2(LAT2)                                | Homo sapiens |
| 1589 | 11726353_at   | turquoise | CD180 molecule(CD180)                                                                 | Homo sapiens |
| 1590 | 11726364_x_at | turquoise | 2'-5'-oligoadenylate synthetase like(OASL)                                            | Homo sapiens |
| 1591 | 11726366_s_at | turquoise | glutamate rich 1(ERIC1)                                                               | Homo sapiens |
| 1592 | 11726368_x_at | turquoise | glutamate rich 1(ERIC1)                                                               | Homo sapiens |
| 1593 | 11726369_at   | turquoise | GRIK1 antisense RNA 2(GRIK1-AS2)                                                      | Homo sapiens |
| 1594 | 11726375_x_at | turquoise | G protein-coupled receptor 34(GPR34)                                                  | Homo sapiens |
| 1595 | 11726378_a_at | turquoise | Wolf-Hirschhorn syndrome candidate 1(WHSC1)                                           | Homo sapiens |
| 1596 | 11726382_a_at | turquoise | signaling lymphocytic activation molecule family member 1(SLAMF1)                     | Homo sapiens |
| 1597 | 11726392_at   | turquoise | GTPase, IMAP family member 2(GIMAP2)                                                  | Homo sapiens |
| 1598 | 11726410_at   | turquoise | GID complex subunit 4 homolog(GID4)                                                   | Homo sapiens |
| 1599 | 11726416_a_at | turquoise | abl interactor 1(ABI1)                                                                | Homo sapiens |
| 1600 | 11726417_x_at | turquoise | abl interactor 1(ABI1)                                                                | Homo sapiens |
| 1601 | 11726418_x_at | turquoise | abl interactor 1(ABI1)                                                                | Homo sapiens |
| 1602 | 11726421_a_at | turquoise | amyloid beta precursor protein binding family B member 1 interacting protein(APBB1IP) | Homo sapiens |
| 1603 | 11726432_a_at | turquoise | oxysterol binding protein like 3(OSBPL3)                                              | Homo sapiens |
| 1604 | 11726433_a_at | turquoise | oxysterol binding protein like 3(OSBPL3)                                              | Homo sapiens |
| 1605 | 11726464_a_at | turquoise | IGF like family receptor 1(IGFLR1)                                                    | Homo sapiens |
| 1606 | 11726473_a_at | turquoise | docking protein 3(DOK3)                                                               | Homo sapiens |
| 1607 | 11726479_a_at | turquoise | MX dynamin like GTPase 2(MX2)                                                         | Homo sapiens |
| 1608 | 11726494_a_at | turquoise | SUMO/sentrin peptidase family member, NEDD8 specific(SEN8)                            | Homo sapiens |
| 1610 | 11726517_s_at | turquoise | WD repeat domain 11(WDR11)                                                            | Homo sapiens |
| 1611 | 11726528_at   | turquoise | family with sequence similarity 81 member A(FAM81A)                                   | Homo sapiens |
| 1612 | 11726532_a_at | turquoise | cytohesin 4(CYTH4)                                                                    | Homo sapiens |
| 1613 | 11726542_at   | turquoise | transmembrane protein 132C(TMEM132C)                                                  | Homo sapiens |

|      |               |           |                                                                     |              |
|------|---------------|-----------|---------------------------------------------------------------------|--------------|
| 1614 | 11726557_a_at | turquoise | gasdermin B(GSDMB)                                                  | Homo sapiens |
| 1615 | 11726559_s_at | turquoise | lymphocyte cytosolic protein 1(LCP1)                                | Homo sapiens |
| 1616 | 11726579_a_at | turquoise | proteasome activator subunit 1(PSM1)                                | Homo sapiens |
| 1617 | 11726580_x_at | turquoise | proteasome activator subunit 1(PSM1)                                | Homo sapiens |
| 1618 | 11726594_a_at | turquoise | cathepsin Z(CTS2)                                                   | Homo sapiens |
| 1619 | 11726608_s_at | turquoise | metal response element binding transcription factor 2(MTF2)         | Homo sapiens |
| 1620 | 11726610_s_at | turquoise | metal response element binding transcription factor 2(MTF2)         | Homo sapiens |
| 1621 | 11726611_x_at | turquoise | MAF bZIP transcription factor F(MAFF)                               | Homo sapiens |
| 1622 | 11726617_s_at | turquoise | cyclin dependent kinase 1(CDK1)                                     | Homo sapiens |
| 1623 | 11726625_at   | turquoise | cyclin G2(CCNG2)                                                    | Homo sapiens |
| 1624 | 11726628_a_at | turquoise | semaphorin 4A(SEMA4A)                                               | Homo sapiens |
| 1625 | 11726647_s_at | turquoise | butyrophilin subfamily 3 member A2(BTN3A2)                          | Homo sapiens |
| 1626 | 11726655_at   | turquoise | interferon induced protein with tetratricopeptide repeats 5(IFIT5)  | Homo sapiens |
| 1627 | 11726656_a_at | turquoise | interferon induced protein with tetratricopeptide repeats 5(IFIT5)  | Homo sapiens |
| 1629 | 11726671_a_at | turquoise | DNA cross-link repair 1B(DCLRE1B)                                   | Homo sapiens |
| 1631 | 11726677_a_at | turquoise | proteasome subunit beta 9(PSMB9)                                    | Homo sapiens |
| 1632 | 11726689_a_at | turquoise | signal transducer and activator of transcription 1(STAT1)           | Homo sapiens |
| 1633 | 11726690_a_at | turquoise | signal transducer and activator of transcription 1(STAT1)           | Homo sapiens |
| 1634 | 11726700_a_at | turquoise | aftiphilin(AFTPH)                                                   | Homo sapiens |
| 1635 | 11726701_x_at | turquoise | aftiphilin(AFTPH)                                                   | Homo sapiens |
| 1636 | 11726702_s_at | turquoise | aftiphilin(AFTPH)                                                   | Homo sapiens |
| 1637 | 11726703_a_at | turquoise | B-cell CLL/lymphoma 10(BCL10)                                       | Homo sapiens |
| 1638 | 11726704_x_at | turquoise | B-cell CLL/lymphoma 10(BCL10)                                       | Homo sapiens |
| 1639 | 11726707_x_at | turquoise | interleukin 34(IL34)                                                | Homo sapiens |
| 1640 | 11726723_a_at | turquoise | WD repeat and FYVE domain containing 2(WDFY2)                       | Homo sapiens |
| 1641 | 11726725_a_at | turquoise | nucleic acid binding protein 1(NABP1)                               | Homo sapiens |
| 1642 | 11726726_s_at | turquoise | nucleic acid binding protein 1(NABP1)                               | Homo sapiens |
| 1643 | 11726727_a_at | turquoise | nucleic acid binding protein 1(NABP1)                               | Homo sapiens |
| 1644 | 11726769_a_at | turquoise | XIAP associated factor 1(XAF1)                                      | Homo sapiens |
| 1645 | 11726770_x_at | turquoise | XIAP associated factor 1(XAF1)                                      | Homo sapiens |
| 1646 | 11726771_a_at | turquoise | XIAP associated factor 1(XAF1)                                      | Homo sapiens |
| 1647 | 11726777_a_at | turquoise | linker for activation of T-cells(LAT)                               | Homo sapiens |
| 1648 | 11726779_a_at | turquoise | IKKB interacting protein(IKBP)                                      | Homo sapiens |
| 1649 | 11726803_x_at | turquoise | helicase with zinc finger 2(HELZ2)                                  | Homo sapiens |
| 1650 | 11726820_a_at | turquoise | Rho GTPase activating protein 9(ARHGAP9)                            | Homo sapiens |
| 1651 | 11726822_a_at | turquoise | chromosome X open reading frame 36(CXorf36)                         | Homo sapiens |
| 1652 | 11726839_s_at | turquoise | RELT like 1(RELL1)                                                  | Homo sapiens |
| 1653 | 11726869_a_at | turquoise | major facilitator superfamily domain containing 12(MFSD12)          | Homo sapiens |
| 1654 | 11726875_a_at | turquoise | promyelocytic leukemia(PML)                                         | Homo sapiens |
| 1655 | 11726876_a_at | turquoise | promyelocytic leukemia(PML)                                         | Homo sapiens |
| 1656 | 11726883_s_at | turquoise | ATPase family, AAA domain containing 2B(ATAD2B)                     | Homo sapiens |
| 1657 | 11726893_a_at | turquoise | microRNA 6132(MIR6132)                                              | Homo sapiens |
| 1658 | 11726928_s_at | turquoise | interleukin 18 binding protein(IL18BP)                              | Homo sapiens |
| 1659 | 11726947_a_at | turquoise | toll like receptor 8(TLR8)                                          | Homo sapiens |
| 1660 | 11726948_at   | turquoise | toll like receptor 8(TLR8)                                          | Homo sapiens |
| 1661 | 11726963_s_at | turquoise | small glutamine rich tetratricopeptide repeat containing beta(SGTB) | Homo sapiens |
| 1664 | 11727005_at   | turquoise | adhesion G protein-coupled receptor L4(ADGRL4)                      | Homo sapiens |
| 1665 | 11727006_a_at | turquoise | T-cell activation RhoGTPase activating protein(TAGAP)               | Homo sapiens |
| 1666 | 11727009_at   | turquoise | aldehyde dehydrogenase 7 family member A1(ALDH7A1)                  | Homo sapiens |
| 1667 | 11727022_a_at | turquoise | transmembrane protein 64(TM64)                                      | Homo sapiens |
| 1668 | 11727044_a_at | turquoise | transmembrane protein 173(TM64)                                     | Homo sapiens |
| 1669 | 11727058_at   | turquoise | mitochondrial ribosomal protein S36(MRPS36)                         | Homo sapiens |
| 1670 | 11727059_x_at | turquoise | mitochondrial ribosomal protein S36(MRPS36)                         | Homo sapiens |
| 1672 | 11727062_at   | turquoise | PIR-FIGF readthrough(PIR-FIGF)                                      | Homo sapiens |
| 1673 | 11727080_at   | turquoise | NUFIP1, FMR1 interacting protein 1(NUFIP1)                          | Homo sapiens |
| 1674 | 11727092_x_at | turquoise | interleukin 18(IL18)                                                | Homo sapiens |
| 1675 | 11727111_a_at | turquoise | formin binding protein 1(FNBP1)                                     | Homo sapiens |
| 1676 | 11727112_a_at | turquoise | signaling threshold regulating transmembrane adaptor 1(SIT1)        | Homo sapiens |
| 1677 | 11727116_a_at | turquoise | phospholipase A1 member A(PLA1A)                                    | Homo sapiens |
| 1678 | 11727118_a_at | turquoise | complement factor properdin(CFP)                                    | Homo sapiens |
| 1679 | 11727120_a_at | turquoise | MYC binding protein 2, E3 ubiquitin protein ligase(MYCBP2)          | Homo sapiens |
| 1680 | 11727121_at   | turquoise | MYC binding protein 2, E3 ubiquitin protein ligase(MYCBP2)          | Homo sapiens |
| 1681 | 11727141_s_at | turquoise | erythrocyte membrane protein band 4.1 like 3(EPB41L3)               | Homo sapiens |
| 1682 | 11727142_a_at | turquoise | erythrocyte membrane protein band 4.1 like 3(EPB41L3)               | Homo sapiens |
| 1683 | 11727143_x_at | turquoise | erythrocyte membrane protein band 4.1 like 3(EPB41L3)               | Homo sapiens |
| 1684 | 11727146_at   | turquoise | G protein-coupled receptor 160(GPR160)                              | Homo sapiens |
| 1685 | 11727186_a_at | turquoise | Wnt family member 5A(WNT5A)                                         | Homo sapiens |
| 1686 | 11727210_at   | turquoise | Purkinje cell protein 2(PCP2)                                       | Homo sapiens |
| 1687 | 11727219_a_at | turquoise | dermatan sulfate epimerase(DSE)                                     | Homo sapiens |
| 1688 | 11727224_a_at | turquoise | polypeptide N-acetylgalactosaminyltransferase 16(GALNT16)           | Homo sapiens |
| 1689 | 11727225_a_at | turquoise | polypeptide N-acetylgalactosaminyltransferase 16(GALNT16)           | Homo sapiens |
| 1690 | 11727254_a_at | turquoise | transmembrane protein 51(TM51)                                      | Homo sapiens |
| 1691 | 11727257_a_at | turquoise | Janus kinase 3(JAK3)                                                | Homo sapiens |
| 1692 | 11727291_at   | turquoise | TEN1-CDK3 readthrough (NMD candidate)(TEN1-CDK3)                    | Homo sapiens |
| 1693 | 11727292_a_at | turquoise | chromosome 1 open reading frame 162(C1orf162)                       | Homo sapiens |
| 1694 | 11727321_at   | turquoise | elastin microfibril interfacier 3(EMILIN3)                          | Homo sapiens |
| 1695 | 11727327_x_at | turquoise | family with sequence similarity 131 member C(FAM131C)               | Homo sapiens |
| 1696 | 11727360_a_at | turquoise | gap junction protein delta 3(GJD3)                                  | Homo sapiens |
| 1697 | 11727372_a_at | turquoise | 3'-phosphoadenosine 5'-phosphosulfate synthase 1(PAPSS1)            | Homo sapiens |
| 1698 | 11727373_s_at | turquoise | 3'-phosphoadenosine 5'-phosphosulfate synthase 1(PAPSS1)            | Homo sapiens |
| 1701 | 11727428_at   | turquoise | G protein-coupled receptor 183(GPR183)                              | Homo sapiens |
| 1702 | 11727456_a_at | turquoise | OFD1, centriole and centriolar satellite protein(OFD1)              | Homo sapiens |

|      |               |           |                                                                    |              |
|------|---------------|-----------|--------------------------------------------------------------------|--------------|
| 1703 | 11727467_x_at | turquoise | interleukin 10 receptor subunit beta(IL10RB)                       | Homo sapiens |
| 1704 | 11727478_a_at | turquoise | angiotensin II receptor associated protein(AGTRAP)                 | Homo sapiens |
| 1705 | 11727489_a_at | turquoise | kinesin family member 11(KIF11)                                    | Homo sapiens |
| 1706 | 11727497_x_at | turquoise | zinc finger RANBP2-type containing 1(ZRANB1)                       | Homo sapiens |
| 1707 | 11727499_s_at | turquoise | zinc finger RANBP2-type containing 1(ZRANB1)                       | Homo sapiens |
| 1708 | 11727516_at   | turquoise | ribonucleoprotein, PTB binding 2(RAVER2)                           | Homo sapiens |
| 1709 | 11727522_a_at | turquoise | zinc finger protein 267(ZNF267)                                    | Homo sapiens |
| 1710 | 11727523_x_at | turquoise | zinc finger protein 267(ZNF267)                                    | Homo sapiens |
| 1711 | 11727532_a_at | turquoise | fasciculation and elongation protein zeta 2(FEZ2)                  | Homo sapiens |
| 1712 | 11727533_a_at | turquoise | fasciculation and elongation protein zeta 2(FEZ2)                  | Homo sapiens |
| 1713 | 11727538_at   | turquoise | NME/NM23 family member 5(NME5)                                     | Homo sapiens |
| 1714 | 11727539_x_at | turquoise | iron-sulfur cluster assembly enzyme(ISCU)                          | Homo sapiens |
| 1715 | 11727547_s_at | turquoise | RB binding protein 8, endonuclease(RBBP8)                          | Homo sapiens |
| 1716 | 11727561_x_at | turquoise | transcription factor 7 (T-cell specific, HMG-box)(TCF7)            | Homo sapiens |
| 1717 | 11727565_a_at | turquoise | tumor necrosis factor superfamily member 13b(TNFSF13B)             | Homo sapiens |
| 1718 | 11727572_s_at | turquoise | kelch like family member 6(KLHL6)                                  | Homo sapiens |
| 1719 | 11727574_at   | turquoise | retinol binding protein 5(RBP5)                                    | Homo sapiens |
| 1720 | 11727577_a_at | turquoise | transmembrane protein 237(TMEM237)                                 | Homo sapiens |
| 1721 | 11727600_a_at | turquoise | TNF receptor superfamily member 4(TNFRSF4)                         | Homo sapiens |
| 1722 | 11727609_at   | turquoise | killer cell lectin like receptor B1(KLRB1)                         | Homo sapiens |
| 1723 | 11727622_a_at | turquoise | vitron(VIT)                                                        | Homo sapiens |
| 1724 | 11727643_s_at | turquoise | transcriptional regulating factor 1(TRETF1)                        | Homo sapiens |
| 1725 | 11727677_at   | turquoise | biogenesis of lysosomal organelles complex 1 subunit 3(BLOC1S3)    | Homo sapiens |
| 1726 | 11727694_a_at | turquoise | KLRC4-KLRK1 readthrough(KLRC4-KLRK1)                               | Homo sapiens |
| 1727 | 11727695_a_at | turquoise | KLRC4-KLRK1 readthrough(KLRC4-KLRK1)                               | Homo sapiens |
| 1728 | 11727701_a_at | turquoise | family with sequence similarity 185 member A(FAM185A)              | Homo sapiens |
| 1729 | 11727707_a_at | turquoise | microRNA 3191(MIR3191)                                             | Homo sapiens |
| 1730 | 11727740_a_at | turquoise | CD300 molecule like family member f(CD300LF)                       | Homo sapiens |
| 1731 | 11727775_s_at | turquoise | G protein subunit alpha i3(GNAI3)                                  | Homo sapiens |
| 1732 | 11727776_at   | turquoise | G protein subunit alpha i3(GNAI3)                                  | Homo sapiens |
| 1733 | 11727778_a_at | turquoise | G protein subunit alpha i3(GNAI3)                                  | Homo sapiens |
| 1734 | 11727779_at   | turquoise | growth hormone inducible transmembrane protein(GHITM)              | Homo sapiens |
| 1735 | 11727782_a_at | turquoise | tropomyosin 4(TPM4)                                                | Homo sapiens |
| 1736 | 11727783_s_at | turquoise | tropomyosin 4(TPM4)                                                | Homo sapiens |
| 1740 | 11727797_at   | turquoise | Nedd4 family interacting protein 2(NDFIP2)                         | Homo sapiens |
| 1741 | 11727816_at   | turquoise | ubiquitin associated and SH3 domain containing B(UBASH3B)          | Homo sapiens |
| 1742 | 11727817_at   | turquoise | ubiquitin associated and SH3 domain containing B(UBASH3B)          | Homo sapiens |
| 1744 | 11727821_s_at | turquoise | CDGSH iron sulfur domain 1(CISD1)                                  | Homo sapiens |
| 1745 | 11727835_a_at | turquoise | Enah/Vasp-like(EVL)                                                | Homo sapiens |
| 1746 | 11727841_a_at | turquoise | protein kinase C delta(PRKCD)                                      | Homo sapiens |
| 1747 | 11727853_a_at | turquoise | nucleoporin 50(NUP50)                                              | Homo sapiens |
| 1748 | 11727854_s_at | turquoise | nucleoporin 50(NUP50)                                              | Homo sapiens |
| 1749 | 11727855_a_at | turquoise | nucleoporin 50(NUP50)                                              | Homo sapiens |
| 1750 | 11727856_s_at | turquoise | nucleoporin 50(NUP50)                                              | Homo sapiens |
| 1751 | 11727876_at   | turquoise | cytochrome b-245 beta chain(CYBB)                                  | Homo sapiens |
| 1752 | 11727877_a_at | turquoise | MIA-RAB4B readthrough (NMD candidate)(MIA-RAB4B)                   | Homo sapiens |
| 1753 | 11727891_a_at | turquoise | proline and arginine rich end leucine rich repeat protein(PRELP)   | Homo sapiens |
| 1754 | 11727892_at   | turquoise | proline and arginine rich end leucine rich repeat protein(PRELP)   | Homo sapiens |
| 1755 | 11727894_a_at | turquoise | G kinase anchoring protein 1(GKAP1)                                | Homo sapiens |
| 1756 | 11727904_s_at | turquoise | interleukin 13 receptor subunit alpha 1(IL13RA1)                   | Homo sapiens |
| 1757 | 11727905_a_at | turquoise | interleukin 13 receptor subunit alpha 1(IL13RA1)                   | Homo sapiens |
| 1758 | 11727913_a_at | turquoise | formin like 1(FMNL1)                                               | Homo sapiens |
| 1759 | 11727920_a_at | turquoise | osteoclast stimulating factor 1(OSTF1)                             | Homo sapiens |
| 1760 | 11727930_a_at | turquoise | ATPase plasma membrane Ca2+ transporting 1(ATP2B1)                 | Homo sapiens |
| 1761 | 11727936_a_at | turquoise | SLC9A3 regulator 1(SLC9A3R1)                                       | Homo sapiens |
| 1762 | 11727942_a_at | turquoise | formyl peptide receptor 3(FPR3)                                    | Homo sapiens |
| 1763 | 11727943_a_at | turquoise | formyl peptide receptor 3(FPR3)                                    | Homo sapiens |
| 1764 | 11727970_a_at | turquoise | solute carrier family 14 member 1 (Kidd blood group)(SLC14A1)      | Homo sapiens |
| 1765 | 11727992_at   | turquoise | syntaxin 11(STX11)                                                 | Homo sapiens |
| 1766 | 11727994_at   | turquoise | syntaxin 11(STX11)                                                 | Homo sapiens |
| 1770 | 11728033_at   | turquoise | SFT2 domain containing 2(SFT2D2)                                   | Homo sapiens |
| 1771 | 11728038_at   | turquoise | C-C motif chemokine ligand 8(CCL8)                                 | Homo sapiens |
| 1772 | 11728039_s_at | turquoise | C-C motif chemokine ligand 8(CCL8)                                 | Homo sapiens |
| 1774 | 11728055_at   | turquoise | growth hormone receptor(GHR)                                       | Homo sapiens |
| 1775 | 11728056_a_at | turquoise | caspase 10(CASP10)                                                 | Homo sapiens |
| 1776 | 11728062_a_at | turquoise | SH3 domain binding protein 1(SH3BP1)                               | Homo sapiens |
| 1777 | 11728063_x_at | turquoise | SH3 domain binding protein 1(SH3BP1)                               | Homo sapiens |
| 1778 | 11728077_s_at | turquoise | protein kinase C theta(PRKCC)                                      | Homo sapiens |
| 1779 | 11728093_a_at | turquoise | mitogen-activated protein kinase kinase kinase 1(MAP3K1)           | Homo sapiens |
| 1780 | 11728094_s_at | turquoise | mitogen-activated protein kinase kinase kinase 1(MAP3K1)           | Homo sapiens |
| 1781 | 11728125_a_at | turquoise | granzyme H(GZMH)                                                   | Homo sapiens |
| 1782 | 11728137_at   | turquoise | X-linked Kx blood group(XK)                                        | Homo sapiens |
| 1783 | 11728146_a_at | turquoise | aquaporin 11(AQP11)                                                | Homo sapiens |
| 1785 | 11728154_s_at | turquoise | fucosyltransferase 4(FUT4)                                         | Homo sapiens |
| 1786 | 11728157_at   | turquoise | ectodysplasin A(EDA)                                               | Homo sapiens |
| 1787 | 11728178_at   | turquoise | sirtuin 4(SIRT4)                                                   | Homo sapiens |
| 1788 | 11728189_a_at | turquoise | C-X-C motif chemokine receptor 4(CXCR4)                            | Homo sapiens |
| 1789 | 11728190_s_at | turquoise | C-X-C motif chemokine receptor 4(CXCR4)                            | Homo sapiens |
| 1790 | 11728191_x_at | turquoise | C-X-C motif chemokine receptor 4(CXCR4)                            | Homo sapiens |
| 1791 | 11728207_a_at | turquoise | XPC complex subunit, DNA damage recognition and repair factor(XPC) | Homo sapiens |
| 1792 | 11728223_at   | turquoise | ubiquitin conjugating enzyme E2 J1(UBE2J1)                         | Homo sapiens |
| 1793 | 11728224_a_at | turquoise | ubiquitin conjugating enzyme E2 J1(UBE2J1)                         | Homo sapiens |

|      |               |           |                                                                                  |              |
|------|---------------|-----------|----------------------------------------------------------------------------------|--------------|
| 1794 | 11728225_at   | turquoise | ubiquitin conjugating enzyme E2 J1(UBE2J1)                                       | Homo sapiens |
| 1795 | 11728228_at   | turquoise | hepatitis A virus cellular receptor 2(HAVCR2)                                    | Homo sapiens |
| 1796 | 11728229_a_at | turquoise | hepatitis A virus cellular receptor 2(HAVCR2)                                    | Homo sapiens |
| 1797 | 11728236_at   | turquoise | CD5 molecule(CD5)                                                                | Homo sapiens |
| 1798 | 11728245_a_at | turquoise | angiopoietin 2(ANGPT2)                                                           | Homo sapiens |
| 1799 | 11728265_a_at | turquoise | leukocyte immunoglobulin like receptor B2(LILRB2)                                | Homo sapiens |
| 1800 | 11728266_a_at | turquoise | leukocyte immunoglobulin like receptor B2(LILRB2)                                | Homo sapiens |
| 1801 | 11728267_s_at | turquoise | leukocyte immunoglobulin like receptor B2(LILRB2)                                | Homo sapiens |
| 1802 | 11728276_s_at | turquoise | phospholipase A2 group XIA(PLA2G12A)                                             | Homo sapiens |
| 1803 | 11728277_x_at | turquoise | phospholipase A2 group XIA(PLA2G12A)                                             | Homo sapiens |
| 1804 | 11728278_a_at | turquoise | phospholipase A2 group XIA(PLA2G12A)                                             | Homo sapiens |
| 1805 | 11728279_at   | turquoise | phospholipase A2 group XIA(PLA2G12A)                                             | Homo sapiens |
| 1806 | 11728291_at   | turquoise | SH2 domain containing 1A(SH2D1A)                                                 | Homo sapiens |
| 1807 | 11728292_at   | turquoise | SH2 domain containing 1A(SH2D1A)                                                 | Homo sapiens |
| 1811 | 11728347_at   | turquoise | ABI family member 3(ABI3)                                                        | Homo sapiens |
| 1812 | 11728350_s_at | turquoise | stromal interaction molecule 2(STIM2)                                            | Homo sapiens |
| 1813 | 11728373_a_at | turquoise | ERG, ETS transcription factor(ERG)                                               | Homo sapiens |
| 1814 | 11728374_s_at | turquoise | actinin alpha 1(ACTN1)                                                           | Homo sapiens |
| 1815 | 11728375_x_at | turquoise | actinin alpha 1(ACTN1)                                                           | Homo sapiens |
| 1816 | 11728378_a_at | turquoise | embryonic ectoderm development(EED)                                              | Homo sapiens |
| 1818 | 11728396_a_at | turquoise | sorting nexin 14(SNX14)                                                          | Homo sapiens |
| 1819 | 11728401_at   | turquoise | ATPase H+ transporting V0 subunit a2(ATP6VOA2)                                   | Homo sapiens |
| 1820 | 11728405_s_at | turquoise | negative regulator of reactive oxygen species(NRROS)                             | Homo sapiens |
| 1821 | 11728413_at   | turquoise | serpin family B member 8(SERPINB8)                                               | Homo sapiens |
| 1822 | 11728421_a_at | turquoise | phospholipase A2 group VII(PLAZG7)                                               | Homo sapiens |
| 1823 | 11728423_a_at | turquoise | paired immunoglobulin like type 2 receptor alpha(PILRA)                          | Homo sapiens |
| 1824 | 11728424_x_at | turquoise | paired immunoglobulin like type 2 receptor alpha(PILRA)                          | Homo sapiens |
| 1826 | 11728430_a_at | turquoise | hes related family bHLH transcription factor with YRPW motif 2(HEY2)             | Homo sapiens |
| 1827 | 11728446_a_at | turquoise | phospholipase C eta 1(PLCH1)                                                     | Homo sapiens |
| 1828 | 11728489_a_at | turquoise | C-type lectin domain family 4 member A(CLEC4A)                                   | Homo sapiens |
| 1829 | 11728503_at   | turquoise | CD300c molecule(CD300C)                                                          | Homo sapiens |
| 1830 | 11728507_at   | turquoise | lymphocyte antigen 96(LY96)                                                      | Homo sapiens |
| 1831 | 11728512_a_at | turquoise | TNF receptor associated factor 5(TRAF5)                                          | Homo sapiens |
| 1833 | 11728514_a_at | turquoise | NADH:ubiquinone oxidoreductase complex assembly factor 6(NDUFAF6)                | Homo sapiens |
| 1834 | 11728515_a_at | turquoise | SP140 nuclear body protein(SP140)                                                | Homo sapiens |
| 1835 | 11728523_a_at | turquoise | v-myc avian myelocytomatosis viral oncogene lung carcinoma derived homolog(MYCL) | Homo sapiens |
| 1836 | 11728530_a_at | turquoise | B-cell linker(BLNK)                                                              | Homo sapiens |
| 1837 | 11728543_a_at | turquoise | maestro(MRO)                                                                     | Homo sapiens |
| 1838 | 11728560_at   | turquoise | granzyme K(GZMK)                                                                 | Homo sapiens |
| 1839 | 11728565_x_at | turquoise | family with sequence similarity 210 member A(FAM210A)                            | Homo sapiens |
| 1841 | 11728570_at   | turquoise | zinc finger protein, FOG family member 2(ZFPM2)                                  | Homo sapiens |
| 1842 | 11728592_at   | turquoise | leucine rich repeat containing 70(LRRC70)                                        | Homo sapiens |
| 1843 | 11728595_a_at | turquoise | caveolin 3(CAV3)                                                                 | Homo sapiens |
| 1844 | 11728617_at   | turquoise | caspase recruitment domain family member 6(CARD6)                                | Homo sapiens |
| 1845 | 11728640_s_at | turquoise | EDAR associated death domain(EDARADD)                                            | Homo sapiens |
| 1846 | 11728643_s_at | turquoise | ARP3 actin related protein 3 homolog(ACTR3)                                      | Homo sapiens |
| 1848 | 11728676_a_at | turquoise | mediator complex subunit 14(MED14)                                               | Homo sapiens |
| 1849 | 11728679_a_at | turquoise | CD163 molecule(CD163)                                                            | Homo sapiens |
| 1850 | 11728680_s_at | turquoise | poly(A) binding protein interacting protein 1(PAIP1)                             | Homo sapiens |
| 1851 | 11728702_s_at | turquoise | KIAA0232(KIAA0232)                                                               | Homo sapiens |
| 1852 | 11728706_x_at | turquoise | epithelial membrane protein 2(EMP2)                                              | Homo sapiens |
| 1853 | 11728711_a_at | turquoise | nuclear factor of activated T-cells 2 interacting protein(NFATC2IP)              | Homo sapiens |
| 1854 | 11728720_at   | turquoise | ras homolog family member H(RHOH)                                                | Homo sapiens |
| 1856 | 11728749_a_at | turquoise | transcription factor 19(TCF19)                                                   | Homo sapiens |
| 1857 | 11728761_a_at | turquoise | uncharacterized LOC100506403(LOC100506403)                                       | Homo sapiens |
| 1858 | 11728766_a_at | turquoise | kelch like family member 5(KLHL5)                                                | Homo sapiens |
| 1859 | 11728767_s_at | turquoise | kelch like family member 5(KLHL5)                                                | Homo sapiens |
| 1860 | 11728768_s_at | turquoise | kelch like family member 5(KLHL5)                                                | Homo sapiens |
| 1861 | 11728776_s_at | turquoise | vitamin D (1,25- dihydroxyvitamin D3) receptor(VDR)                              | Homo sapiens |
| 1862 | 11728780_a_at | turquoise | zeta chain of T cell receptor associated protein kinase 70(ZAP70)                | Homo sapiens |
| 1863 | 11728781_a_at | turquoise | CD1c molecule(CD1C)                                                              | Homo sapiens |
| 1864 | 11728810_a_at | turquoise | enoyl-CoA hydratase domain containing 3(ECHDC3)                                  | Homo sapiens |
| 1865 | 11728811_a_at | turquoise | OTU deubiquitinase 7B(OTUD7B)                                                    | Homo sapiens |
| 1869 | 11728846_at   | turquoise | heart and neural crest derivatives expressed 1(HAND1)                            | Homo sapiens |
| 1870 | 11728852_a_at | turquoise | tubby bipartite transcription factor(TUB)                                        | Homo sapiens |
| 1871 | 11728863_at   | turquoise | GIN5 complex subunit 1(GINS1)                                                    | Homo sapiens |
| 1872 | 11728892_at   | turquoise | tubulin polymerization promoting protein(TPPP)                                   | Homo sapiens |
| 1873 | 11728901_a_at | turquoise | dual adaptor of phosphotyrosine and 3-phosphoinositides 1(DAPP1)                 | Homo sapiens |
| 1874 | 11728920_a_at | turquoise | RAS guanyl releasing protein 1(RASGRP1)                                          | Homo sapiens |
| 1875 | 11728926_at   | turquoise | NFAT activating protein with ITAM motif 1(NFAM1)                                 | Homo sapiens |
| 1876 | 11728937_at   | turquoise | GDNF family receptor alpha 2(GFRA2)                                              | Homo sapiens |
| 1877 | 11728944_a_at | turquoise | leukocyte specific transcript 1(LST1)                                            | Homo sapiens |
| 1878 | 11728945_x_at | turquoise | leukocyte specific transcript 1(LST1)                                            | Homo sapiens |
| 1879 | 11728961_a_at | turquoise | TSNAX-DISC1 readthrough (NMD candidate)(TSNAX-DISC1)                             | Homo sapiens |
| 1880 | 11728978_x_at | turquoise | caspase 8(CASP8)                                                                 | Homo sapiens |
| 1881 | 11728984_a_at | turquoise | monofunctional C1-tetrahydrofolate synthase, mitochondrial-like(LOC100996643)    | Homo sapiens |
| 1882 | 11728985_s_at | turquoise | monofunctional C1-tetrahydrofolate synthase, mitochondrial-like(LOC100996643)    | Homo sapiens |
| 1883 | 11728986_x_at | turquoise | monofunctional C1-tetrahydrofolate synthase, mitochondrial-like(LOC100996643)    | Homo sapiens |
| 1884 | 11729000_x_at | turquoise | CD84 molecule(CD84)                                                              | Homo sapiens |
| 1885 | 11729023_at   | turquoise | potassium voltage-gated channel subfamily A member 5(KCNA5)                      | Homo sapiens |
| 1886 | 11729033_at   | turquoise | inositol 1,4,5-trisphosphate receptor interacting protein like 2(ITPR1L2)        | Homo sapiens |
| 1887 | 11729035_at   | turquoise | inositol 1,4,5-trisphosphate receptor interacting protein like 2(ITPR1L2)        | Homo sapiens |

|      |               |           |                                                                             |              |
|------|---------------|-----------|-----------------------------------------------------------------------------|--------------|
| 1888 | 11729074_a_at | turquoise | hydroxylysine kinase(HYKK)                                                  | Homo sapiens |
| 1889 | 11729101_a_at | turquoise | aldo-keto reductase family 1 member C2(AKR1C2)                              | Homo sapiens |
| 1890 | 11729110_s_at | turquoise | ADAM like decysin 1(ADAMDEC1)                                               | Homo sapiens |
| 1891 | 11729111_x_at | turquoise | ADAM like decysin 1(ADAMDEC1)                                               | Homo sapiens |
| 1897 | 11729138_a_at | turquoise | SLAM family member 7(SLAMF7)                                                | Homo sapiens |
| 1898 | 11729139_x_at | turquoise | SLAM family member 7(SLAMF7)                                                | Homo sapiens |
| 1899 | 11729140_x_at | turquoise | SLAM family member 7(SLAMF7)                                                | Homo sapiens |
| 1901 | 11729163_a_at | turquoise | BTG anti-proliferation factor 3(BTG3)                                       | Homo sapiens |
| 1902 | 11729191_s_at | turquoise | MYC associated factor X(MAX)                                                | Homo sapiens |
| 1903 | 11729202_at   | turquoise | Kazal type serine peptidase inhibitor domain 1(KAZALD1)                     | Homo sapiens |
| 1904 | 11729203_a_at | turquoise | plexin D1(PLXND1)                                                           | Homo sapiens |
| 1905 | 11729219_at   | turquoise | NCK adaptor protein 1(NCK1)                                                 | Homo sapiens |
| 1906 | 11729220_at   | turquoise | carboxymethylenebutenolidase homolog(CMBL)                                  | Homo sapiens |
| 1907 | 11729222_a_at | turquoise | GATA binding protein 3(GATA3)                                               | Homo sapiens |
| 1908 | 11729223_at   | turquoise | GATA binding protein 3(GATA3)                                               | Homo sapiens |
| 1909 | 11729226_x_at | turquoise | integrin subunit alpha L(ITGAL)                                             | Homo sapiens |
| 1911 | 11729247_at   | turquoise | sirtuin 5(SIRT5)                                                            | Homo sapiens |
| 1912 | 11729251_at   | turquoise | myeloid cell nuclear differentiation antigen(MNDA)                          | Homo sapiens |
| 1913 | 11729263_x_at | turquoise | serpin family B member 9(SERPINB9)                                          | Homo sapiens |
| 1914 | 11729272_a_at | turquoise | ankyrin repeat and SOCS box containing 1(ASB1)                              | Homo sapiens |
| 1915 | 11729274_a_at | turquoise | guanylate binding protein 5(GBP5)                                           | Homo sapiens |
| 1918 | 11729338_x_at | turquoise | proline-serine-threonine phosphatase interacting protein 2(PSTPIP2)         | Homo sapiens |
| 1919 | 11729357_x_at | turquoise | poly(A) RNA polymerase D4, non-canonical(PAPD4)                             | Homo sapiens |
| 1920 | 11729410_a_at | turquoise | zinc finger protein 415(ZNF415)                                             | Homo sapiens |
| 1921 | 11729419_a_at | turquoise | ATPase sarcoplasmic/endoplasmic reticulum Ca2+ transporting 3(ATP2A3)       | Homo sapiens |
| 1923 | 11729424_s_at | turquoise | C-C motif chemokine receptor like 2(CCR2)                                   | Homo sapiens |
| 1924 | 11729431_a_at | turquoise | phosphatase domain containing, paladin 1(PALD1)                             | Homo sapiens |
| 1925 | 11729442_a_at | turquoise | TEPSIN, adaptor related protein complex 4 accessory protein(TEPSIN)         | Homo sapiens |
| 1926 | 11729443_a_at | turquoise | promyelocytic leukemia(PML)                                                 | Homo sapiens |
| 1927 | 11729449_s_at | turquoise | TERF1 interacting nuclear factor 2(TINF2)                                   | Homo sapiens |
| 1928 | 11729458_a_at | turquoise | Fanconi anemia complementation group I(FANCI)                               | Homo sapiens |
| 1929 | 11729479_a_at | turquoise | C-type lectin domain family 12 member A(CLEC12A)                            | Homo sapiens |
| 1930 | 11729481_s_at | turquoise | guanylate kinase 1(GUK1)                                                    | Homo sapiens |
| 1931 | 11729485_a_at | turquoise | regulator of G-protein signaling 6(RGS6)                                    | Homo sapiens |
| 1932 | 11729487_at   | turquoise | regulator of G-protein signaling 6(RGS6)                                    | Homo sapiens |
| 1933 | 11729520_at   | turquoise | chromosome X open reading frame 65(CXorf65)                                 | Homo sapiens |
| 1934 | 11729523_a_at | turquoise | NLR family CARD domain containing 5(NLRCS)                                  | Homo sapiens |
| 1935 | 11729542_a_at | turquoise | calcium/calmodulin dependent protein kinase kinase 2(CAMKK2)                | Homo sapiens |
| 1936 | 11729570_x_at | turquoise | mitogen-activated protein kinase kinase kinase 1(MAP4K1)                    | Homo sapiens |
| 1937 | 11729574_at   | turquoise | ectodermal-neural cortex 1(ENC1)                                            | Homo sapiens |
| 1938 | 11729603_a_at | turquoise | minichromosome maintenance complex component 7(MCM7)                        | Homo sapiens |
| 1939 | 11729610_a_at | turquoise | engulfment and cell motility 1(ELMO1)                                       | Homo sapiens |
| 1940 | 11729611_a_at | turquoise | actin related protein 2/3 complex subunit 4(ARPC4)                          | Homo sapiens |
| 1941 | 11729619_at   | turquoise | chloride voltage-gated channel 4(CLCN4)                                     | Homo sapiens |
| 1942 | 11729620_at   | turquoise | chloride voltage-gated channel 4(CLCN4)                                     | Homo sapiens |
| 1944 | 11729622_at   | turquoise | chloride voltage-gated channel 4(CLCN4)                                     | Homo sapiens |
| 1945 | 11729649_at   | turquoise | perforin 1(PRF1)                                                            | Homo sapiens |
| 1946 | 11729657_a_at | turquoise | SP110 nuclear body protein(SP110)                                           | Homo sapiens |
| 1947 | 11729658_a_at | turquoise | SP110 nuclear body protein(SP110)                                           | Homo sapiens |
| 1949 | 11729667_a_at | turquoise | nucleolar protein 3(NOL3)                                                   | Homo sapiens |
| 1951 | 11729676_s_at | turquoise | cyclin dependent kinase 17(CDK17)                                           | Homo sapiens |
| 1952 | 11729687_at   | turquoise | LYR motif containing 7(LYRM7)                                               | Homo sapiens |
| 1953 | 11729689_s_at | turquoise | LYR motif containing 7(LYRM7)                                               | Homo sapiens |
| 1954 | 11729721_s_at | turquoise | leukocyte immunoglobulin like receptor B3(LILRB3)                           | Homo sapiens |
| 1955 | 11729741_x_at | turquoise | CD68 molecule(CD68)                                                         | Homo sapiens |
| 1956 | 11729747_a_at | turquoise | interleukin 10 receptor subunit alpha(IL10RA)                               | Homo sapiens |
| 1957 | 11729752_a_at | turquoise | epidermal growth factor receptor pathway substrate 15 like 1(EPS15L1)       | Homo sapiens |
| 1958 | 11729754_at   | turquoise | unc-51 like autophagy activating kinase 2(ULK2)                             | Homo sapiens |
| 1959 | 11729758_at   | turquoise | regulator of G-protein signaling 18(RGS18)                                  | Homo sapiens |
| 1960 | 11729759_at   | turquoise | regulator of G-protein signaling 18(RGS18)                                  | Homo sapiens |
| 1961 | 11729769_a_at | turquoise | CD38 molecule(CD38)                                                         | Homo sapiens |
| 1963 | 11729821_at   | turquoise | interleukin 27 receptor subunit alpha(IL27RA)                               | Homo sapiens |
| 1964 | 11729851_a_at | turquoise | Rap associating with DIL domain(RADIL)                                      | Homo sapiens |
| 1965 | 11729855_at   | turquoise | CD3e molecule(CD3E)                                                         | Homo sapiens |
| 1966 | 11729886_at   | turquoise | chromosome 18 open reading frame 54(C18orf54)                               | Homo sapiens |
| 1967 | 11729889_at   | turquoise | ZFP3 zinc finger protein(ZFP3)                                              | Homo sapiens |
| 1968 | 11729924_at   | turquoise | tet methylcytosine dioxygenase 3(TET3)                                      | Homo sapiens |
| 1969 | 11729954_a_at | turquoise | fragile histidine triad(FHIT)                                               | Homo sapiens |
| 1970 | 11729955_x_at | turquoise | fragile histidine triad(FHIT)                                               | Homo sapiens |
| 1971 | 11729976_a_at | turquoise | protein tyrosine phosphatase, receptor type N2(PTPRN2)                      | Homo sapiens |
| 1972 | 11729977_a_at | turquoise | C-X-C motif chemokine receptor 6(CXCR6)                                     | Homo sapiens |
| 1973 | 11729980_a_at | turquoise | phosphatidylinositol specific phospholipase C X domain containing 3(PLCXD3) | Homo sapiens |
| 1974 | 11729981_s_at | turquoise | poly(ADP-ribose) polymerase family member 11(PARP11)                        | Homo sapiens |
| 1975 | 11729996_a_at | turquoise | schlafen family member 12(SLFN12)                                           | Homo sapiens |
| 1976 | 11730005_a_at | turquoise | semaphorin 4D(SEMA4D)                                                       | Homo sapiens |
| 1979 | 11730060_a_at | turquoise | lymphocyte activating 3(LAG3)                                               | Homo sapiens |
| 1980 | 11730067_at   | turquoise | granzyme M(GZMM)                                                            | Homo sapiens |
| 1981 | 11730090_a_at | turquoise | TNFSF12-TNFSF13 readthrough(TNFSF12-TNFSF13)                                | Homo sapiens |
| 1982 | 11730096_a_at | turquoise | BCL2 related protein A1(BCL2A1)                                             | Homo sapiens |
| 1983 | 11730099_a_at | turquoise | fms related tyrosine kinase 3 ligand(FLT3LG)                                | Homo sapiens |
| 1984 | 11730100_x_at | turquoise | fms related tyrosine kinase 3 ligand(FLT3LG)                                | Homo sapiens |
| 1985 | 11730109_a_at | turquoise | NLR family CARD domain containing 3(NLRC3)                                  | Homo sapiens |

|      |               |           |                                                                                   |              |
|------|---------------|-----------|-----------------------------------------------------------------------------------|--------------|
| 1986 | 11730145_s_at | turquoise | kelch like family member 31(KLHL31)                                               | Homo sapiens |
| 1988 | 11730148_a_at | turquoise | adhesion G protein-coupled receptor G5(ADGRG5)                                    | Homo sapiens |
| 1989 | 11730155_a_at | turquoise | sarcoglycan delta(SGCD)                                                           | Homo sapiens |
| 1991 | 11730168_s_at | turquoise | lipopolysaccharide induced TNF factor(LITAF)                                      | Homo sapiens |
| 1993 | 11730190_a_at | turquoise | Obg like ATPase 1(OLA1)                                                           | Homo sapiens |
| 1994 | 11730191_a_at | turquoise | SEC14 like lipid binding 2(SEC14L2)                                               | Homo sapiens |
| 1995 | 11730207_at   | turquoise | ArfGAP with RhoGAP domain, ankyrin repeat and PH domain 2(ARAP2)                  | Homo sapiens |
| 1998 | 11730217_a_at | turquoise | ceramide synthase 5(CERS5)                                                        | Homo sapiens |
| 1999 | 11730218_s_at | turquoise | ceramide synthase 5(CERS5)                                                        | Homo sapiens |
| 2000 | 11730231_s_at | turquoise | TIA1 cytotoxic granule associated RNA binding protein like 1(TIAL1)               | Homo sapiens |
| 2001 | 11730237_at   | turquoise | abhydrolase domain containing 10(ABHD10)                                          | Homo sapiens |
| 2002 | 11730244_at   | turquoise | flavin containing monooxygenase 2(FMO2)                                           | Homo sapiens |
| 2003 | 11730247_a_at | turquoise | stromal antigen 3(STAG3)                                                          | Homo sapiens |
| 2004 | 11730250_a_at | turquoise | ligand of numb-protein X 1(LNX1)                                                  | Homo sapiens |
| 2005 | 11730251_x_at | turquoise | ligand of numb-protein X 1(LNX1)                                                  | Homo sapiens |
| 2006 | 11730254_at   | turquoise | ELK3, ETS transcription factor(ELK3)                                              | Homo sapiens |
| 2007 | 11730259_a_at | turquoise | zinc finger C2HC-type containing 1C(ZC2HC1C)                                      | Homo sapiens |
| 2008 | 11730269_at   | turquoise | NIPBL, cohesin loading factor(NIPBL)                                              | Homo sapiens |
| 2009 | 11730274_at   | turquoise | calcitonin receptor like receptor(CALCRL)                                         | Homo sapiens |
| 2010 | 11730296_a_at | turquoise | toll like receptor 3(TLR3)                                                        | Homo sapiens |
| 2011 | 11730301_a_at | turquoise | lipoic acid synthetase(LIAS)                                                      | Homo sapiens |
| 2012 | 11730322_a_at | turquoise | C-type lectin domain family 2 member D(CLECD2)                                    | Homo sapiens |
| 2013 | 11730342_x_at | turquoise | Src like adaptor 2(SLA2)                                                          | Homo sapiens |
| 2014 | 11730372_a_at | turquoise | FYN binding protein(FYB)                                                          | Homo sapiens |
| 2015 | 11730373_a_at | turquoise | FYN binding protein(FYB)                                                          | Homo sapiens |
| 2016 | 11730374_a_at | turquoise | FYN binding protein(FYB)                                                          | Homo sapiens |
| 2017 | 11730399_at   | turquoise | AT-rich interaction domain 3A(ARID3A)                                             | Homo sapiens |
| 2018 | 11730403_a_at | turquoise | MRE11 homolog, double strand break repair nuclease(MRE11)                         | Homo sapiens |
| 2019 | 11730424_at   | turquoise | APC down-regulated 1 like(APCDD1L)                                                | Homo sapiens |
| 2020 | 11730428_a_at | turquoise | adaptor related protein complex 1 beta 1 subunit(AP1B1)                           | Homo sapiens |
| 2022 | 11730457_a_at | turquoise | absent in melanoma 2(AIM2)                                                        | Homo sapiens |
| 2023 | 11730458_at   | turquoise | absent in melanoma 2(AIM2)                                                        | Homo sapiens |
| 2024 | 11730469_s_at | turquoise | LIM domain only 2(LMO2)                                                           | Homo sapiens |
| 2025 | 11730478_at   | turquoise | ring finger protein 125(RNF125)                                                   | Homo sapiens |
| 2027 | 11730555_a_at | turquoise | TRIM6-TRIM34 readthrough(TRIM6-TRIM34)                                            | Homo sapiens |
| 2028 | 11730556_s_at | turquoise | TRIM6-TRIM34 readthrough(TRIM6-TRIM34)                                            | Homo sapiens |
| 2029 | 11730600_s_at | turquoise | putative aquaporin-7-like protein 3(LOC100509620)                                 | Homo sapiens |
| 2030 | 11730611_at   | turquoise | mucolipin 2(MCOLN2)                                                               | Homo sapiens |
| 2031 | 11730637_a_at | turquoise | cytotoxic T-lymphocyte associated protein 4(CTLA4)                                | Homo sapiens |
| 2033 | 11730690_a_at | turquoise | family with sequence similarity 111 member A(FAM111A)                             | Homo sapiens |
| 2034 | 11730729_a_at | turquoise | transporter 1, ATP binding cassette subfamily B member(TAP1)                      | Homo sapiens |
| 2035 | 11730752_s_at | turquoise | 1-acylglycerol-3-phosphate O-acyltransferase 5(AGPAT5)                            | Homo sapiens |
| 2036 | 11730754_s_at | turquoise | 1-acylglycerol-3-phosphate O-acyltransferase 5(AGPAT5)                            | Homo sapiens |
| 2037 | 11730779_at   | turquoise | alcohol dehydrogenase 1C (class I), gamma polypeptide(ADH1C)                      | Homo sapiens |
| 2038 | 11730780_x_at | turquoise | alcohol dehydrogenase 1C (class I), gamma polypeptide(ADH1C)                      | Homo sapiens |
| 2039 | 11730782_x_at | turquoise | solute carrier family 2 member 6(SLC2A6)                                          | Homo sapiens |
| 2041 | 11730795_at   | turquoise | mitochondrial ribosomal protein L4(MRPL4)                                         | Homo sapiens |
| 2042 | 11730804_s_at | turquoise | pre-mRNA processing factor 38B(PRF38B)                                            | Homo sapiens |
| 2043 | 11730806_at   | turquoise | butyrophilin subfamily 3 member A2(BTN3A2)                                        | Homo sapiens |
| 2044 | 11730807_x_at | turquoise | butyrophilin subfamily 3 member A2(BTN3A2)                                        | Homo sapiens |
| 2045 | 11730813_at   | turquoise | leukocyte immunoglobulin like receptor B4(LILRB4)                                 | Homo sapiens |
| 2046 | 11730815_x_at | turquoise | leukocyte immunoglobulin like receptor B4(LILRB4)                                 | Homo sapiens |
| 2047 | 11730817_a_at | turquoise | CTD small phosphatase like 2(CTDSPL2)                                             | Homo sapiens |
| 2049 | 11730837_x_at | turquoise | WD repeat domain 55(WDR55)                                                        | Homo sapiens |
| 2050 | 11730862_at   | turquoise | CTTNBP2 N-terminal like(CTTNBP2NL)                                                | Homo sapiens |
| 2051 | 11730864_s_at | turquoise | CTTNBP2 N-terminal like(CTTNBP2NL)                                                | Homo sapiens |
| 2052 | 11730873_a_at | turquoise | Ras association domain family member 5(RASSF5)                                    | Homo sapiens |
| 2053 | 11730875_a_at | turquoise | Fanconi anemia complementation group I(FANCI)                                     | Homo sapiens |
| 2054 | 11730894_a_at | turquoise | ubiquitin like modifier activating enzyme 6(UBA6)                                 | Homo sapiens |
| 2055 | 11730909_s_at | turquoise | C-C motif chemokine receptor 5 (gene/pseudogene)(CCR5)                            | Homo sapiens |
| 2056 | 11730914_a_at | turquoise | ER lipid raft associated 1(ERLIN1)                                                | Homo sapiens |
| 2057 | 11730923_x_at | turquoise | ADAM metallopeptidase with thrombospondin type 1 motif 4(ADAMTS4)                 | Homo sapiens |
| 2058 | 11730928_a_at | turquoise | inhibitor of kappa light polypeptide gene enhancer in B-cells, kinase beta(IKKBK) | Homo sapiens |
| 2059 | 11730929_s_at | turquoise | inhibitor of kappa light polypeptide gene enhancer in B-cells, kinase beta(IKKBK) | Homo sapiens |
| 2060 | 11730930_a_at | turquoise | inhibitor of kappa light polypeptide gene enhancer in B-cells, kinase beta(IKKBK) | Homo sapiens |
| 2061 | 11730931_at   | turquoise | acyl-CoA synthetase short-chain family member 3(ACSS3)                            | Homo sapiens |
| 2062 | 11730932_at   | turquoise | acyl-CoA synthetase short-chain family member 3(ACSS3)                            | Homo sapiens |
| 2063 | 11730935_a_at | turquoise | AT-hook transcription factor(AKNA)                                                | Homo sapiens |
| 2064 | 11730936_s_at | turquoise | AT-hook transcription factor(AKNA)                                                | Homo sapiens |
| 2065 | 11730943_x_at | turquoise | osteoclast associated, immunoglobulin-like receptor(OSCAR)                        | Homo sapiens |
| 2066 | 11730947_at   | turquoise | interferon gamma(IFNG)                                                            | Homo sapiens |
| 2068 | 11730962_a_at | turquoise | choline/ethanolamine phosphotransferase 1(CEPT1)                                  | Homo sapiens |
| 2069 | 11730966_at   | turquoise | mitogen-activated protein kinase 11(MAPK11)                                       | Homo sapiens |
| 2070 | 11730968_at   | turquoise | RIC8 guanine nucleotide exchange factor B(RIC8B)                                  | Homo sapiens |
| 2071 | 11730994_at   | turquoise | sphingosine-1-phosphate receptor 4(S1PR4)                                         | Homo sapiens |
| 2072 | 11730996_a_at | turquoise | junction adhesion molecule like(JAML)                                             | Homo sapiens |
| 2073 | 11731004_at   | turquoise | MIS18 binding protein 1(MIS18BP1)                                                 | Homo sapiens |
| 2074 | 11731005_at   | turquoise | MIS18 binding protein 1(MIS18BP1)                                                 | Homo sapiens |
| 2075 | 11731006_s_at | turquoise | MIS18 binding protein 1(MIS18BP1)                                                 | Homo sapiens |
| 2076 | 11731019_x_at | turquoise | allograft inflammatory factor 1(AIF1)                                             | Homo sapiens |
| 2077 | 11731023_a_at | turquoise | ataxin 7(ATXN7)                                                                   | Homo sapiens |
| 2078 | 11731024_s_at | turquoise | ataxin 7(ATXN7)                                                                   | Homo sapiens |

|      |               |           |                                                                                 |              |
|------|---------------|-----------|---------------------------------------------------------------------------------|--------------|
| 2079 | 11731036_a_at | turquoise | fibrinogen C domain containing 1(FIBCD1)                                        | Homo sapiens |
| 2080 | 11731039_s_at | turquoise | interleukin 15 receptor subunit alpha(IL15RA)                                   | Homo sapiens |
| 2081 | 11731066_x_at | turquoise | GTPase, IMAP family member 1(GIMAP1)                                            | Homo sapiens |
| 2082 | 11731110_at   | turquoise | ADAM metallopeptidase domain 17(ADAM17)                                         | Homo sapiens |
| 2083 | 11731147_at   | turquoise | toll like receptor 7(TLR7)                                                      | Homo sapiens |
| 2084 | 11731148_at   | turquoise | toll like receptor 7(TLR7)                                                      | Homo sapiens |
| 2085 | 11731181_a_at | turquoise | epithelial stromal interaction 1(EPST1)                                         | Homo sapiens |
| 2086 | 11731196_a_at | turquoise | proline rich 5 like(PRR5L)                                                      | Homo sapiens |
| 2087 | 11731197_a_at | turquoise | proline rich 5 like(PRR5L)                                                      | Homo sapiens |
| 2088 | 11731200_a_at | turquoise | toll like receptor 5(TLR5)                                                      | Homo sapiens |
| 2089 | 11731209_s_at | turquoise | chromosome 15 open reading frame 59(C15orf59)                                   | Homo sapiens |
| 2090 | 11731227_a_at | turquoise | megakaryocyte-associated tyrosine kinase(MATK)                                  | Homo sapiens |
| 2091 | 11731230_a_at | turquoise | RNA pseudouridylyl synthase domain containing 3(RPUSD3)                         | Homo sapiens |
| 2093 | 11731281_a_at | turquoise | nuclear factor of activated T-cells 1(NFATC1)                                   | Homo sapiens |
| 2094 | 11731309_at   | turquoise | chromosome 15 open reading frame 56(C15orf56)                                   | Homo sapiens |
| 2095 | 11731340_at   | turquoise | nucleotide binding oligomerization domain containing 2(NOD2)                    | Homo sapiens |
| 2096 | 11731346_a_at | turquoise | diacylglycerol kinase zeta(DGKZ)                                                | Homo sapiens |
| 2097 | 11731356_a_at | turquoise | inositol hexakisphosphate kinase 3(IP6K3)                                       | Homo sapiens |
| 2098 | 11731360_a_at | turquoise | inducible T-cell costimulator(ICOS)                                             | Homo sapiens |
| 2099 | 11731394_a_at | turquoise | vimentin(VIM)                                                                   | Homo sapiens |
| 2100 | 11731407_x_at | turquoise | interferon induced protein with tetratricopeptide repeats 3(IFIT3)              | Homo sapiens |
| 2102 | 11731422_s_at | turquoise | Fc fragment of IgG receptor IIIa(FCGR3A)                                        | Homo sapiens |
| 2103 | 11731433_a_at | turquoise | selenoprotein P(SELENOP)                                                        | Homo sapiens |
| 2104 | 11731465_a_at | turquoise | cathepsin C(CTSC)                                                               | Homo sapiens |
| 2105 | 11731466_a_at | turquoise | cathepsin C(CTSC)                                                               | Homo sapiens |
| 2106 | 11731485_x_at | turquoise | nuclear factor I C(NFIC)                                                        | Homo sapiens |
| 2107 | 11731504_a_at | turquoise | chromosome 22 open reading frame 39(C22orf39)                                   | Homo sapiens |
| 2108 | 11731505_a_at | turquoise | chromosome 22 open reading frame 39(C22orf39)                                   | Homo sapiens |
| 2109 | 11731518_at   | turquoise | microfibrillar associated protein 3(MFAP3)                                      | Homo sapiens |
| 2110 | 11731531_x_at | turquoise | docking protein 1(DOK1)                                                         | Homo sapiens |
| 2111 | 11731555_at   | turquoise | synaptopodin 2(SYNPO2)                                                          | Homo sapiens |
| 2112 | 11731556_a_at | turquoise | synaptopodin 2(SYNPO2)                                                          | Homo sapiens |
| 2114 | 11731575_a_at | turquoise | chitinase(CTBS)                                                                 | Homo sapiens |
| 2115 | 11731613_a_at | turquoise | Ras homolog enriched in brain like 1(RHEBL1)                                    | Homo sapiens |
| 2117 | 11731617_x_at | turquoise | SID1 transmembrane family member 1(SIDT1)                                       | Homo sapiens |
| 2118 | 11731620_a_at | turquoise | arrestin beta 2(ARRB2)                                                          | Homo sapiens |
| 2119 | 11731641_s_at | turquoise | trafficking protein particle complex subunit 10-like(LOC102724200)              | Homo sapiens |
| 2120 | 11731644_s_at | turquoise | trafficking protein particle complex subunit 10-like(LOC102724200)              | Homo sapiens |
| 2121 | 11731657_s_at | turquoise | vav guanine nucleotide exchange factor 3(VAV3)                                  | Homo sapiens |
| 2122 | 11731667_s_at | turquoise | platelet derived growth factor subunit B(PDGFB)                                 | Homo sapiens |
| 2123 | 11731669_at   | turquoise | G protein-coupled receptor 65(GPR65)                                            | Homo sapiens |
| 2125 | 11731676_s_at | turquoise | C-C motif chemokine receptor 2(CCR2)                                            | Homo sapiens |
| 2126 | 11731702_a_at | turquoise | C-type lectin domain family 2 member D(CLECD2)                                  | Homo sapiens |
| 2127 | 11731722_a_at | turquoise | aldehyde dehydrogenase 3 family member B1(ALDH3B1)                              | Homo sapiens |
| 2128 | 11731728_at   | turquoise | purinergic receptor P2Y13(P2RY13)                                               | Homo sapiens |
| 2129 | 11731729_at   | turquoise | purinergic receptor P2Y13(P2RY13)                                               | Homo sapiens |
| 2130 | 11731755_a_at | turquoise | synaptotagmin like 2(SYTL2)                                                     | Homo sapiens |
| 2131 | 11731764_a_at | turquoise | CD3g molecule(CD3G)                                                             | Homo sapiens |
| 2132 | 11731770_a_at | turquoise | dermatan sulfate epimerase(DSE)                                                 | Homo sapiens |
| 2133 | 11731777_a_at | turquoise | protein O-linked mannose N-acetylglucosaminyltransferase 2 (beta 1,4-)(POMGNT2) | Homo sapiens |
| 2134 | 11731783_a_at | turquoise | RAS protein activator like 3(RASAL3)                                            | Homo sapiens |
| 2135 | 11731798_a_at | turquoise | galectin 2(LGALS2)                                                              | Homo sapiens |
| 2136 | 11731799_at   | turquoise | urocortin 3(UCN3)                                                               | Homo sapiens |
| 2137 | 11731818_a_at | turquoise | CD40 molecule(CD40)                                                             | Homo sapiens |
| 2138 | 11731820_at   | turquoise | ADAM metallopeptidase domain 11(ADAM11)                                         | Homo sapiens |
| 2139 | 11731821_at   | turquoise | ADAM metallopeptidase domain 11(ADAM11)                                         | Homo sapiens |
| 2140 | 11731845_a_at | turquoise | immunoglobulin superfamily member 3(IGSF3)                                      | Homo sapiens |
| 2141 | 11731848_s_at | turquoise | killer cell lectin like receptor C1(KLRC1)                                      | Homo sapiens |
| 2142 | 11731873_a_at | turquoise | CD209 molecule(CD209)                                                           | Homo sapiens |
| 2143 | 11731879_a_at | turquoise | NLR family pyrin domain containing 1(NLRP1)                                     | Homo sapiens |
| 2144 | 11731880_at   | turquoise | NLR family pyrin domain containing 1(NLRP1)                                     | Homo sapiens |
| 2145 | 11731914_at   | turquoise | adhesion molecule with Ig like domain 1(AMIGO1)                                 | Homo sapiens |
| 2147 | 11731942_a_at | turquoise | PR/SET domain 1(PRDM1)                                                          | Homo sapiens |
| 2148 | 11731949_a_at | turquoise | sterile alpha motif domain containing 3(SAMD3)                                  | Homo sapiens |
| 2149 | 11731950_x_at | turquoise | sterile alpha motif domain containing 3(SAMD3)                                  | Homo sapiens |
| 2150 | 11731978_s_at | turquoise | proprotein convertase subtilisin/kexin type 7(PCSK7)                            | Homo sapiens |
| 2151 | 11731998_s_at | turquoise | coiled-coil domain containing 88C(CCDC88C)                                      | Homo sapiens |
| 2152 | 11732004_a_at | turquoise | adenosine deaminase like(ADAL)                                                  | Homo sapiens |
| 2153 | 11732006_s_at | turquoise | adenosine deaminase like(ADAL)                                                  | Homo sapiens |
| 2154 | 11732017_a_at | turquoise | interleukin 18 receptor accessory protein(IL18RAP)                              | Homo sapiens |
| 2155 | 11732058_a_at | turquoise | cell division cycle 7(CDC7)                                                     | Homo sapiens |
| 2156 | 11732084_a_at | turquoise | transcription factor EC(TFEC)                                                   | Homo sapiens |
| 2157 | 11732110_a_at | turquoise | interleukin 4 induced 1(IL4I1)                                                  | Homo sapiens |
| 2158 | 11732153_a_at | turquoise | zinc finger DHHC-type containing 6(ZDHHC6)                                      | Homo sapiens |
| 2159 | 11732155_a_at | turquoise | O-linked N-acetylglucosamine (GlcNAc) transferase(OGT)                          | Homo sapiens |
| 2160 | 11732169_a_at | turquoise | protein tyrosine phosphatase, non-receptor type 7(PTPN7)                        | Homo sapiens |
| 2161 | 11732171_x_at | turquoise | G-rich RNA sequence binding factor 1(GRSF1)                                     | Homo sapiens |
| 2162 | 11732180_a_at | turquoise | platelet activating factor receptor(PTAFR)                                      | Homo sapiens |
| 2163 | 11732181_x_at | turquoise | platelet activating factor receptor(PTAFR)                                      | Homo sapiens |
| 2165 | 11732218_x_at | turquoise | BH3 interacting domain death agonist(BID)                                       | Homo sapiens |
| 2166 | 11732220_a_at | turquoise | enoyl-CoA delta isomerase 1(EC11)                                               | Homo sapiens |
| 2167 | 11732232_x_at | turquoise | ORAI calcium release-activated calcium modulator 2(ORAI2)                       | Homo sapiens |

|      |               |           |                                                                     |              |
|------|---------------|-----------|---------------------------------------------------------------------|--------------|
| 2168 | 11732243_at   | turquoise | apolipoprotein L6(APOL6)                                            | Homo sapiens |
| 2169 | 11732244_at   | turquoise | apolipoprotein L6(APOL6)                                            | Homo sapiens |
| 2170 | 11732247_s_at | turquoise | heterogeneous nuclear ribonucleoprotein C (C1/C2)(HNRNPC)           | Homo sapiens |
| 2171 | 11732265_at   | turquoise | leukocyte immunoglobulin like receptor B1(LILRB1)                   | Homo sapiens |
| 2172 | 11732266_x_at | turquoise | leukocyte immunoglobulin like receptor B1(LILRB1)                   | Homo sapiens |
| 2173 | 11732273_at   | turquoise | cytochrome c oxidase assembly factor 7 (putative)(COA7)             | Homo sapiens |
| 2174 | 11732275_at   | turquoise | C-C motif chemokine ligand 5(CCL5)                                  | Homo sapiens |
| 2175 | 11732276_x_at | turquoise | C-C motif chemokine ligand 5(CCL5)                                  | Homo sapiens |
| 2176 | 11732278_at   | turquoise | forkhead box P1(FOXP1)                                              | Homo sapiens |
| 2177 | 11732315_a_at | turquoise | sarcoglycan delta(SGCD)                                             | Homo sapiens |
| 2179 | 11732323_at   | turquoise | frataxin(FXN)                                                       | Homo sapiens |
| 2180 | 11732331_s_at | turquoise | ADP ribosylation factor like GTPase 4C(ARL4C)                       | Homo sapiens |
| 2181 | 11732349_at   | turquoise | leukocyte immunoglobulin like receptor A6(LILRA6)                   | Homo sapiens |
| 2182 | 11732355_x_at | turquoise | major histocompatibility complex, class I, F(HLA-F)                 | Homo sapiens |
| 2183 | 11732366_a_at | turquoise | S-phase cyclin A associated protein in the ER(SCAPER)               | Homo sapiens |
| 2184 | 11732369_a_at | turquoise | fibroblast growth factor 14(FGF14)                                  | Homo sapiens |
| 2185 | 11732402_a_at | turquoise | UBA domain containing 1(UBAC1)                                      | Homo sapiens |
| 2186 | 11732414_a_at | turquoise | leucine rich repeat containing 8 family member B(LRRC8B)            | Homo sapiens |
| 2187 | 11732418_at   | turquoise | family with sequence similarity 105 member A(FAM105A)               | Homo sapiens |
| 2188 | 11732424_at   | turquoise | ankyrin repeat domain 22(ANKRD22)                                   | Homo sapiens |
| 2189 | 11732425_at   | turquoise | ankyrin repeat domain 22(ANKRD22)                                   | Homo sapiens |
| 2190 | 11732435_at   | turquoise | SLP adaptor and CSK interacting membrane protein(SCIMP)             | Homo sapiens |
| 2191 | 11732450_s_at | turquoise | agrin(AGRN)                                                         | Homo sapiens |
| 2192 | 11732456_a_at | turquoise | membrane associated ring-CH-type finger 1(MARCH1)                   | Homo sapiens |
| 2193 | 11732466_a_at | turquoise | C-X-C motif chemokine ligand 11(CXCL11)                             | Homo sapiens |
| 2194 | 11732467_x_at | turquoise | C-X-C motif chemokine ligand 11(CXCL11)                             | Homo sapiens |
| 2195 | 11732469_at   | turquoise | interleukin 3 receptor subunit alpha(IL3RA)                         | Homo sapiens |
| 2196 | 11732479_a_at | turquoise | integrin subunit alpha M(ITGAM)                                     | Homo sapiens |
| 2197 | 11732480_s_at | turquoise | integrin subunit alpha M(ITGAM)                                     | Homo sapiens |
| 2198 | 11732481_a_at | turquoise | integrin subunit alpha M(ITGAM)                                     | Homo sapiens |
| 2199 | 11732492_at   | turquoise | KIAA1549(KIAA1549)                                                  | Homo sapiens |
| 2201 | 11732514_s_at | turquoise | LYN proto-oncogene, Src family tyrosine kinase(LYN)                 | Homo sapiens |
| 2202 | 11732519_at   | turquoise | cholesterol 25-hydroxylase(CH25H)                                   | Homo sapiens |
| 2205 | 11732526_s_at | turquoise | chondroitin sulfate N-acetylgalactosaminyltransferase 1(CSGALNACT1) | Homo sapiens |
| 2206 | 11732528_s_at | turquoise | T-box 5(TBX5)                                                       | Homo sapiens |
| 2207 | 11732529_a_at | turquoise | T-box 5(TBX5)                                                       | Homo sapiens |
| 2208 | 11732531_s_at | turquoise | NEDD4 binding protein 2 like 1(N4BP2L1)                             | Homo sapiens |
| 2209 | 11732533_a_at | turquoise | lamin B1(LMNB1)                                                     | Homo sapiens |
| 2210 | 11732538_at   | turquoise | T-box 21(TBX21)                                                     | Homo sapiens |
| 2211 | 11732544_x_at | turquoise | G protein-coupled receptor 18(GPR18)                                | Homo sapiens |
| 2212 | 11732550_at   | turquoise | prostaglandin E receptor 2(PTGER2)                                  | Homo sapiens |
| 2213 | 11732555_at   | turquoise | Fas ligand(FASLG)                                                   | Homo sapiens |
| 2214 | 11732580_a_at | turquoise | malic enzyme 3(ME3)                                                 | Homo sapiens |
| 2217 | 11732589_a_at | turquoise | zinc finger protein 467(ZNF467)                                     | Homo sapiens |
| 2218 | 11732601_at   | turquoise | centrosomal protein 135(CEP135)                                     | Homo sapiens |
| 2219 | 11732602_at   | turquoise | centrosomal protein 135(CEP135)                                     | Homo sapiens |
| 2220 | 11732650_a_at | turquoise | hexosaminidase D(HEXDC)                                             | Homo sapiens |
| 2221 | 11732661_x_at | turquoise | SCL/TAL1 interrupting locus(STIL)                                   | Homo sapiens |
| 2222 | 11732701_a_at | turquoise | chondroitin sulfate N-acetylgalactosaminyltransferase 2(CSGALNACT2) | Homo sapiens |
| 2223 | 11732709_x_at | turquoise | sarcoglycan alpha(SGCA)                                             | Homo sapiens |
| 2224 | 11732759_at   | turquoise | GRB2 binding adaptor protein, transmembrane(GAPT)                   | Homo sapiens |
| 2225 | 11732798_a_at | turquoise | mirror-image polydactyly 1(MIPOL1)                                  | Homo sapiens |
| 2226 | 11732813_at   | turquoise | dendritic cell associated nuclear protein(DCANP1)                   | Homo sapiens |
| 2227 | 11732827_a_at | turquoise | renalase, FAD dependent amine oxidase(RNLS)                         | Homo sapiens |
| 2228 | 11732854_x_at | turquoise | scavenger receptor class F member 1(SCARF1)                         | Homo sapiens |
| 2230 | 11732870_a_at | turquoise | caspase 1(CASP1)                                                    | Homo sapiens |
| 2231 | 11732873_x_at | turquoise | mitochondrial translation release factor 1(MTRF1)                   | Homo sapiens |
| 2232 | 11732894_x_at | turquoise | cyclin dependent kinase like 3(CDKL3)                               | Homo sapiens |
| 2233 | 11732896_a_at | turquoise | hydroxysteroid 11-beta dehydrogenase 1 like(HSD11B1L)               | Homo sapiens |
| 2234 | 11732901_x_at | turquoise | APOBEC3A and APOBEC3B deletion hybrid(APOBEC3A_B)                   | Homo sapiens |
| 2235 | 11732902_x_at | turquoise | apolipoprotein B mRNA editing enzyme catalytic subunit 3B(APOBEC3B) | Homo sapiens |
| 2236 | 11732913_a_at | turquoise | SP140 nuclear body protein(SP140)                                   | Homo sapiens |
| 2237 | 11732927_x_at | turquoise | killer cell lectin like receptor C1(KLRC1)                          | Homo sapiens |
| 2238 | 11732936_a_at | turquoise | TBC1 domain family member 2B(TBC1D2B)                               | Homo sapiens |
| 2239 | 11732956_a_at | turquoise | TCR gamma alternate reading frame protein(TARP)                     | Homo sapiens |
| 2240 | 11732999_a_at | turquoise | intercellular adhesion molecule 1(ICAM1)                            | Homo sapiens |
| 2241 | 11733000_at   | turquoise | intercellular adhesion molecule 1(ICAM1)                            | Homo sapiens |
| 2242 | 11733004_s_at | turquoise | Fc fragment of IgG receptor IIIa(FCGR3A)                            | Homo sapiens |
| 2243 | 11733006_at   | turquoise | angiominin like 2(AMOTL2)                                           | Homo sapiens |
| 2244 | 11733014_a_at | turquoise | ring finger protein 213(RNF213)                                     | Homo sapiens |
| 2245 | 11733021_x_at | turquoise | lactate dehydrogenase A(LDHA)                                       | Homo sapiens |
| 2246 | 11733023_s_at | turquoise | BTG anti-proliferation factor 1(BTG1)                               | Homo sapiens |
| 2247 | 11733024_x_at | turquoise | BTG anti-proliferation factor 1(BTG1)                               | Homo sapiens |
| 2248 | 11733030_s_at | turquoise | axin interactor, dorsalization associated(AIDA)                     | Homo sapiens |
| 2250 | 11733033_a_at | turquoise | family with sequence similarity 32 member A(FAM32A)                 | Homo sapiens |
| 2251 | 11733046_x_at | turquoise | abl interactor 1(ABI1)                                              | Homo sapiens |
| 2252 | 11733047_a_at | turquoise | abl interactor 1(ABI1)                                              | Homo sapiens |
| 2253 | 11733052_s_at | turquoise | secretory carrier membrane protein 1(SCAMP1)                        | Homo sapiens |
| 2254 | 11733056_s_at | turquoise | polypyrimidine tract binding protein 3(PTBP3)                       | Homo sapiens |
| 2255 | 11733057_a_at | turquoise | polypyrimidine tract binding protein 3(PTBP3)                       | Homo sapiens |
| 2256 | 11733058_a_at | turquoise | polypyrimidine tract binding protein 3(PTBP3)                       | Homo sapiens |
| 2257 | 11733060_a_at | turquoise | pellino E3 ubiquitin protein ligase 1(PELI1)                        | Homo sapiens |



|      |               |           |                                                                     |              |
|------|---------------|-----------|---------------------------------------------------------------------|--------------|
| 2258 | 11733061_s_at | turquoise | pellino E3 ubiquitin protein ligase 1(PELI1)                        | Homo sapiens |
| 2259 | 11733087_a_at | turquoise | MAF bZIP transcription factor(MAF)                                  | Homo sapiens |
| 2260 | 11733088_a_at | turquoise | MAF bZIP transcription factor(MAF)                                  | Homo sapiens |
| 2261 | 11733127_a_at | turquoise | solute carrier family 25 member 26(SLC25A26)                        | Homo sapiens |
| 2263 | 11733140_s_at | turquoise | ADP ribosylation factor like GTPase 4A(ARL4A)                       | Homo sapiens |
| 2264 | 11733148_a_at | turquoise | annexin A4(ANXA4)                                                   | Homo sapiens |
| 2265 | 11733149_a_at | turquoise | DExD/H-box helicase 58(DDX58)                                       | Homo sapiens |
| 2266 | 11733161_a_at | turquoise | TNF alpha induced protein 8(TNFAIP8)                                | Homo sapiens |
| 2267 | 11733162_a_at | turquoise | proline-serine-threonine phosphatase interacting protein 1(PSTPIP1) | Homo sapiens |
| 2268 | 11733187_a_at | turquoise | interleukin 7 receptor(IL7R)                                        | Homo sapiens |
| 2269 | 11733194_s_at | turquoise | formin like 3(FMNL3)                                                | Homo sapiens |
| 2270 | 11733198_a_at | turquoise | DExD-box helicase 39A(DDX39A)                                       | Homo sapiens |
| 2271 | 11733213_x_at | turquoise | schlafen family member 5(SLFN5)                                     | Homo sapiens |
| 2272 | 11733214_a_at | turquoise | schlafen family member 5(SLFN5)                                     | Homo sapiens |
| 2273 | 11733215_a_at | turquoise | signal transducer and activator of transcription 4(STAT4)           | Homo sapiens |
| 2274 | 11733246_a_at | turquoise | dystrobrevin binding protein 1(DTNBP1)                              | Homo sapiens |
| 2276 | 11733264_a_at | turquoise | echinoderm microtubule associated protein like 1(EML1)              | Homo sapiens |
| 2277 | 11733334_a_at | turquoise | neuropilin 2(NRP2)                                                  | Homo sapiens |
| 2278 | 11733343_a_at | turquoise | UTP6, small subunit processome component(UTP6)                      | Homo sapiens |
| 2279 | 11733353_a_at | turquoise | cytotoxic and regulatory T-cell molecule(CRTAM)                     | Homo sapiens |
| 2280 | 11733355_x_at | turquoise | complement C5a receptor 1(C5AR1)                                    | Homo sapiens |
| 2281 | 11733360_x_at | turquoise | solute carrier family 14 member 1 (Kidd blood group)(SLC14A1)       | Homo sapiens |
| 2282 | 11733370_a_at | turquoise | proteasome activator subunit 1(PSME1)                               | Homo sapiens |
| 2283 | 11733389_a_at | turquoise | DEF6, guanine nucleotide exchange factor(DEF6)                      | Homo sapiens |
| 2284 | 11733402_a_at | turquoise | C-type lectin domain family 7 member A(CLEC7A)                      | Homo sapiens |
| 2285 | 11733403_x_at | turquoise | C-type lectin domain family 7 member A(CLEC7A)                      | Homo sapiens |
| 2286 | 11733411_a_at | turquoise | transcription factor 15 (basic helix-loop-helix)(TCF15)             | Homo sapiens |
| 2287 | 11733439_a_at | turquoise | guanylate binding protein 5(GBP5)                                   | Homo sapiens |
| 2288 | 11733450_a_at | turquoise | schlafen family member 11(SLFN11)                                   | Homo sapiens |
| 2289 | 11733477_at   | turquoise | succinate receptor 1(SUCNR1)                                        | Homo sapiens |
| 2290 | 11733485_a_at | turquoise | calcium voltage-gated channel subunit alpha1 C(CACNA1C)             | Homo sapiens |
| 2291 | 11733494_a_at | turquoise | NEDD4 binding protein 2 like 2(N4BP2L2)                             | Homo sapiens |
| 2292 | 11733511_a_at | turquoise | myotubularin related protein 1(MTMR1)                               | Homo sapiens |
| 2293 | 11733512_s_at | turquoise | myotubularin related protein 1(MTMR1)                               | Homo sapiens |
| 2295 | 11733525_at   | turquoise | chromosome 2 open reading frame 71(C2orf71)                         | Homo sapiens |
| 2296 | 11733530_at   | turquoise | complement C1r subcomponent like(C1RL)                              | Homo sapiens |
| 2299 | 11733579_a_at | turquoise | chromosome 19 open reading frame 47(C19orf47)                       | Homo sapiens |
| 2300 | 11733611_a_at | turquoise | dedicator of cytokinesis 8(DOCK8)                                   | Homo sapiens |
| 2301 | 11733612_s_at | turquoise | dedicator of cytokinesis 8(DOCK8)                                   | Homo sapiens |
| 2302 | 11733616_a_at | turquoise | histamine N-methyltransferase(HNMT)                                 | Homo sapiens |
| 2303 | 11733620_a_at | turquoise | B-cell CLL/lymphoma 11B(BCL11B)                                     | Homo sapiens |
| 2304 | 11733632_s_at | turquoise | purinergic receptor P2Y14(P2RY14)                                   | Homo sapiens |
| 2305 | 11733641_a_at | turquoise | kinesin light chain 4(KLC4)                                         | Homo sapiens |
| 2306 | 11733642_s_at | turquoise | NECAP endocytosis associated 2(NECAP2)                              | Homo sapiens |
| 2307 | 11733643_x_at | turquoise | NECAP endocytosis associated 2(NECAP2)                              | Homo sapiens |
| 2308 | 11733644_s_at | turquoise | NECAP endocytosis associated 2(NECAP2)                              | Homo sapiens |
| 2310 | 11733695_a_at | turquoise | ubiquitin conjugating enzyme E2 C(UBE2C)                            | Homo sapiens |
| 2311 | 11733696_x_at | turquoise | ubiquitin conjugating enzyme E2 C(UBE2C)                            | Homo sapiens |
| 2312 | 11733698_s_at | turquoise | serum/glucocorticoid regulated kinase 1(SGK1)                       | Homo sapiens |
| 2313 | 11733699_a_at | turquoise | TEA domain transcription factor 4(TEAD4)                            | Homo sapiens |
| 2314 | 11733701_a_at | turquoise | FK506 binding protein 11(FKBP11)                                    | Homo sapiens |
| 2315 | 11733702_x_at | turquoise | ubiquitin conjugating enzyme E2 C(UBE2C)                            | Homo sapiens |
| 2316 | 11733718_x_at | turquoise | leukocyte associated immunoglobulin like receptor 2(LAIR2)          | Homo sapiens |
| 2317 | 11733725_a_at | turquoise | complement factor B(CFB)                                            | Homo sapiens |
| 2318 | 11733736_a_at | turquoise | CD2 molecule(CD2)                                                   | Homo sapiens |
| 2319 | 11733754_a_at | turquoise | pleckstrin homology domain containing A4(PLEKHA4)                   | Homo sapiens |
| 2320 | 11733767_a_at | turquoise | leukocyte immunoglobulin like receptor A2(LILRA2)                   | Homo sapiens |
| 2321 | 11733768_x_at | turquoise | leukocyte immunoglobulin like receptor A2(LILRA2)                   | Homo sapiens |
| 2322 | 11733784_at   | turquoise | protein phosphatase 2 scaffold subunit Abeta(PPP2R1B)               | Homo sapiens |
| 2324 | 11733809_s_at | turquoise | ARMCX5-GPRASP2 readthrough(ARMCX5-GPRASP2)                          | Homo sapiens |
| 2325 | 11733841_a_at | turquoise | ecotropic viral integration site 2A(EVI2A)                          | Homo sapiens |
| 2326 | 11733845_at   | turquoise | G protein-coupled receptor kinase 6(GRK6)                           | Homo sapiens |
| 2327 | 11733846_a_at | turquoise | G protein-coupled receptor kinase 6(GRK6)                           | Homo sapiens |
| 2328 | 11733855_a_at | turquoise | apolipoprotein L1(APOL1)                                            | Homo sapiens |
| 2330 | 11733867_a_at | turquoise | major histocompatibility complex, class II, DO alpha(HLA-DOA)       | Homo sapiens |
| 2331 | 11733868_at   | turquoise | major histocompatibility complex, class II, DO alpha(HLA-DOA)       | Homo sapiens |
| 2332 | 11733869_a_at | turquoise | major histocompatibility complex, class II, DO alpha(HLA-DOA)       | Homo sapiens |
| 2333 | 11733870_at   | turquoise | major histocompatibility complex, class II, DO alpha(HLA-DOA)       | Homo sapiens |
| 2334 | 11733878_a_at | turquoise | LIM domain 7(LMO7)                                                  | Homo sapiens |
| 2335 | 11733894_x_at | turquoise | transcriptional adaptor 2B(TADA2B)                                  | Homo sapiens |
| 2337 | 11733934_a_at | turquoise | primary cilia formation(PIFO)                                       | Homo sapiens |
| 2338 | 11733946_at   | turquoise | RAP2B, member of RAS oncogene family(RAP2B)                         | Homo sapiens |
| 2339 | 11733950_at   | turquoise | guanylate binding protein 4(GBP4)                                   | Homo sapiens |
| 2340 | 11733951_at   | turquoise | guanylate binding protein 4(GBP4)                                   | Homo sapiens |
| 2341 | 11733952_at   | turquoise | guanylate binding protein 4(GBP4)                                   | Homo sapiens |
| 2342 | 11733953_x_at | turquoise | guanylate binding protein 4(GBP4)                                   | Homo sapiens |
| 2343 | 11733960_a_at | turquoise | USH1 protein network component sans(USH1G)                          | Homo sapiens |
| 2344 | 11733979_at   | turquoise | CD28 molecule(CD28)                                                 | Homo sapiens |
| 2345 | 11733986_x_at | turquoise | tubulin alpha 3e(TUBA3E)                                            | Homo sapiens |
| 2346 | 11733992_a_at | turquoise | transmembrane protein 150C(TMEM150C)                                | Homo sapiens |
| 2347 | 11734006_a_at | turquoise | interleukin 1 receptor associated kinase 1(IRAK1)                   | Homo sapiens |
| 2349 | 11734035_a_at | turquoise | formyl peptide receptor 2(FPR2)                                     | Homo sapiens |

|      |               |           |                                                                                   |              |
|------|---------------|-----------|-----------------------------------------------------------------------------------|--------------|
| 2350 | 11734050_a_at | turquoise | T cell receptor associated transmembrane adaptor 1(TRAT1)                         | Homo sapiens |
| 2351 | 11734051_a_at | turquoise | T cell receptor associated transmembrane adaptor 1(TRAT1)                         | Homo sapiens |
| 2352 | 11734056_a_at | turquoise | prostaglandin reductase 2(PGTR2)                                                  | Homo sapiens |
| 2353 | 11734064_a_at | turquoise | uncharacterized LOC100130460(CAND1.11)                                            | Homo sapiens |
| 2354 | 11734065_a_at | turquoise | uncharacterized LOC100130460(CAND1.11)                                            | Homo sapiens |
| 2355 | 11734066_x_at | turquoise | interleukin 1 receptor associated kinase 4(IRAK4)                                 | Homo sapiens |
| 2356 | 11734067_a_at | turquoise | interleukin 1 receptor associated kinase 4(IRAK4)                                 | Homo sapiens |
| 2357 | 11734084_a_at | turquoise | sushi domain containing 3(SUSD3)                                                  | Homo sapiens |
| 2358 | 11734110_at   | turquoise | T-cell immunoreceptor with Ig and ITIM domains(TIGIT)                             | Homo sapiens |
| 2359 | 11734112_at   | turquoise | T-cell immunoreceptor with Ig and ITIM domains(TIGIT)                             | Homo sapiens |
| 2360 | 11734117_a_at | turquoise | butyrophilin subfamily 3 member A3(BTN3A3)                                        | Homo sapiens |
| 2361 | 11734118_a_at | turquoise | butyrophilin subfamily 3 member A3(BTN3A3)                                        | Homo sapiens |
| 2362 | 11734126_a_at | turquoise | nucleotide binding oligomerization domain containing 1(NOD1)                      | Homo sapiens |
| 2363 | 11734139_a_at | turquoise | TBC1 domain family member 10C(TBC1D10C)                                           | Homo sapiens |
| 2364 | 11734162_a_at | turquoise | transcription factor EC(TFEC)                                                     | Homo sapiens |
| 2365 | 11734185_at   | turquoise | zinc finger protein 677(ZNF677)                                                   | Homo sapiens |
| 2366 | 11734259_a_at | turquoise | sterol carrier protein 2(SCP2)                                                    | Homo sapiens |
| 2367 | 11734273_s_at | turquoise | G protein-coupled receptor 18(GPR18)                                              | Homo sapiens |
| 2368 | 11734359_a_at | turquoise | ribonuclease L(RNASEL)                                                            | Homo sapiens |
| 2369 | 11734394_at   | turquoise | killer cell lectin like receptor C3(KLRC3)                                        | Homo sapiens |
| 2370 | 11734395_x_at | turquoise | killer cell lectin like receptor C3(KLRC3)                                        | Homo sapiens |
| 2372 | 11734521_x_at | turquoise | sodium channel and clathrin linker 1(SCLT1)                                       | Homo sapiens |
| 2373 | 11734526_a_at | turquoise | uncharacterized LOC100507472(LOC100507472)                                        | Homo sapiens |
| 2374 | 11734529_x_at | turquoise | paired immunoglobulin like type 2 receptor alpha(PILRA)                           | Homo sapiens |
| 2375 | 11734530_x_at | turquoise | major histocompatibility complex, class I, F(HLA-F)                               | Homo sapiens |
| 2376 | 11734536_a_at | turquoise | glycoprotein Ib platelet alpha subunit(GP1BA)                                     | Homo sapiens |
| 2377 | 11734548_a_at | turquoise | transforming growth factor beta induced(TGFB1)                                    | Homo sapiens |
| 2378 | 11734549_s_at | turquoise | transforming growth factor beta induced(TGFB1)                                    | Homo sapiens |
| 2379 | 11734550_x_at | turquoise | transforming growth factor beta induced(TGFB1)                                    | Homo sapiens |
| 2380 | 11734552_a_at | turquoise | C-X3-C motif chemokine ligand 1(CX3CL1)                                           | Homo sapiens |
| 2381 | 11734567_a_at | turquoise | RAS guanyl releasing protein 2(RASGRP2)                                           | Homo sapiens |
| 2382 | 11734577_a_at | turquoise | sodium voltage-gated channel alpha subunit 5(SCN5A)                               | Homo sapiens |
| 2383 | 11734606_a_at | turquoise | C-X-C motif chemokine receptor 3(CXCR3)                                           | Homo sapiens |
| 2386 | 11734657_s_at | turquoise | solute carrier family 2 member 14(SLC2A14)                                        | Homo sapiens |
| 2387 | 11734659_a_at | turquoise | Fos proto-oncogene, AP-1 transcription factor subunit(FOS)                        | Homo sapiens |
| 2388 | 11734661_a_at | turquoise | calsynenin 3(CLSTN3)                                                              | Homo sapiens |
| 2389 | 11734672_a_at | turquoise | nuclear factor of activated T-cells 4(NFATC4)                                     | Homo sapiens |
| 2390 | 11734684_s_at | turquoise | uridine monophosphate synthetase(UMPS)                                            | Homo sapiens |
| 2391 | 11734687_at   | turquoise | methyl-CpG binding domain protein 2(MBD2)                                         | Homo sapiens |
| 2392 | 11734690_a_at | turquoise | cytohesin 1 interacting protein(CYTIP)                                            | Homo sapiens |
| 2393 | 11734695_a_at | turquoise | protein phosphatase 4 catalytic subunit(PPP4C)                                    | Homo sapiens |
| 2394 | 11734715_a_at | turquoise | DBF4 zinc finger(DBF4)                                                            | Homo sapiens |
| 2395 | 11734727_a_at | turquoise | interleukin 16(IL16)                                                              | Homo sapiens |
| 2398 | 11734747_a_at | turquoise | complement component 4B (Chido blood group), copy 2(C4B_2)                        | Homo sapiens |
| 2399 | 11734772_a_at | turquoise | synergism gamma(SYNRG)                                                            | Homo sapiens |
| 2400 | 11734783_at   | turquoise | chloride intracellular channel 2(CLIC2)                                           | Homo sapiens |
| 2401 | 11734784_a_at | turquoise | chloride intracellular channel 2(CLIC2)                                           | Homo sapiens |
| 2402 | 11734785_at   | turquoise | chloride intracellular channel 2(CLIC2)                                           | Homo sapiens |
| 2403 | 11734791_x_at | turquoise | septin 6(SEPT6)                                                                   | Homo sapiens |
| 2404 | 11734798_x_at | turquoise | ring finger protein, LIM domain interacting(RLIM)                                 | Homo sapiens |
| 2405 | 11734825_at   | turquoise | sprouty related EVH1 domain containing 1(SPRED1)                                  | Homo sapiens |
| 2406 | 11734826_s_at | turquoise | sprouty related EVH1 domain containing 1(SPRED1)                                  | Homo sapiens |
| 2407 | 11734852_a_at | turquoise | RUN and cysteine rich domain containing beclin 1 interacting protein like(RUBCNL) | Homo sapiens |
| 2409 | 11734870_a_at | turquoise | NAD kinase(NADK)                                                                  | Homo sapiens |
| 2410 | 11734873_a_at | turquoise | S-phase cyclin A associated protein in the ER(SCAPER)                             | Homo sapiens |
| 2411 | 11734890_a_at | turquoise | interleukin 32(IL32)                                                              | Homo sapiens |
| 2412 | 11734894_at   | turquoise | CST telomere replication complex component 1(CTC1)                                | Homo sapiens |
| 2413 | 11734921_a_at | turquoise | zinc finger protein 276(ZNF276)                                                   | Homo sapiens |
| 2414 | 11734922_x_at | turquoise | zinc finger protein 276(ZNF276)                                                   | Homo sapiens |
| 2415 | 11734924_a_at | turquoise | ATPase H+ transporting V1 subunit G2(ATP6V1G2)                                    | Homo sapiens |
| 2416 | 11734938_x_at | turquoise | colony stimulating factor 2 receptor alpha subunit(CSF2RA)                        | Homo sapiens |
| 2417 | 11734943_a_at | turquoise | SLAM family member 6(SLAMF6)                                                      | Homo sapiens |
| 2418 | 11734944_a_at | turquoise | SLAM family member 6(SLAMF6)                                                      | Homo sapiens |
| 2419 | 11734948_x_at | turquoise | fibroblast growth factor 7(FGF7)                                                  | Homo sapiens |
| 2420 | 11734962_x_at | turquoise | ADAM metalloproteinase domain 33(ADAM33)                                          | Homo sapiens |
| 2421 | 11734967_a_at | turquoise | thymocyte selection associated(THEMIS)                                            | Homo sapiens |
| 2422 | 11735003_a_at | turquoise | suppression of tumorigenicity 7 like(ST7L)                                        | Homo sapiens |
| 2423 | 11735026_at   | turquoise | sialophorin(SPN)                                                                  | Homo sapiens |
| 2424 | 11735027_x_at | turquoise | sialophorin(SPN)                                                                  | Homo sapiens |
| 2425 | 11735039_s_at | turquoise | shootin 1(SHTN1)                                                                  | Homo sapiens |
| 2427 | 11735044_x_at | turquoise | tripartite motif containing 5(TRIM5)                                              | Homo sapiens |
| 2430 | 11735124_a_at | turquoise | interaction protein for cytohesin exchange factors 1(IPCEF1)                      | Homo sapiens |
| 2431 | 11735157_at   | turquoise | cysteiny leukotriene receptor 1(CYSLTR1)                                          | Homo sapiens |
| 2432 | 11735173_a_at | turquoise | small nuclear ribonucleoprotein polypeptide N(SNRPN)                              | Homo sapiens |
| 2433 | 11735174_a_at | turquoise | interleukin 32(IL32)                                                              | Homo sapiens |
| 2434 | 11735189_s_at | turquoise | H2A histone family member Y(H2AFY)                                                | Homo sapiens |
| 2435 | 11735192_a_at | turquoise | adhesion G protein-coupled receptor E2(ADGRE2)                                    | Homo sapiens |
| 2436 | 11735204_a_at | turquoise | methylmalonic aciduria (cobalamin deficiency) cblA type(MMAA)                     | Homo sapiens |
| 2437 | 11735205_s_at | turquoise | methylmalonic aciduria (cobalamin deficiency) cblA type(MMAA)                     | Homo sapiens |
| 2438 | 11735220_at   | turquoise | lysophosphatidic acid receptor 3(LPAR3)                                           | Homo sapiens |
| 2439 | 11735221_a_at | turquoise | B and T lymphocyte associated(BTLA)                                               | Homo sapiens |
| 2440 | 11735222_a_at | turquoise | B and T lymphocyte associated(BTLA)                                               | Homo sapiens |

|      |               |           |                                                                             |              |
|------|---------------|-----------|-----------------------------------------------------------------------------|--------------|
| 2441 | 11735223_a_at | turquoise | killer cell lectin like receptor G1(KLRG1)                                  | Homo sapiens |
| 2442 | 11735224_a_at | turquoise | killer cell lectin like receptor G1(KLRG1)                                  | Homo sapiens |
| 2443 | 11735225_x_at | turquoise | guanidinoacetate N-methyltransferase(GAMT)                                  | Homo sapiens |
| 2444 | 11735249_x_at | turquoise | SP140 nuclear body protein like(SP140L)                                     | Homo sapiens |
| 2445 | 11735270_a_at | turquoise | glucosaminyl (N-acetyl) transferase 1, core 2(GCNT1)                        | Homo sapiens |
| 2446 | 11735271_a_at | turquoise | glucosaminyl (N-acetyl) transferase 1, core 2(GCNT1)                        | Homo sapiens |
| 2447 | 11735275_at   | turquoise | interleukin 18 receptor 1(IL18R1)                                           | Homo sapiens |
| 2448 | 11735284_x_at | turquoise | lysine methyltransferase 2E(KMT2E)                                          | Homo sapiens |
| 2449 | 11735290_a_at | turquoise | TNFAIP3 interacting protein 2(TNIP2)                                        | Homo sapiens |
| 2450 | 11735329_a_at | turquoise | CD47 molecule(CD47)                                                         | Homo sapiens |
| 2452 | 11735394_s_at | turquoise | X-C motif chemokine ligand 1(XCL1)                                          | Homo sapiens |
| 2453 | 11735416_x_at | turquoise | DNA cross-link repair 1C(DCLRE1C)                                           | Homo sapiens |
| 2454 | 11735429_x_at | turquoise | ring finger protein 135(RNF135)                                             | Homo sapiens |
| 2455 | 11735474_a_at | turquoise | CD8b molecule(CD8B)                                                         | Homo sapiens |
| 2456 | 11735502_a_at | turquoise | TAP binding protein(TAPBP)                                                  | Homo sapiens |
| 2457 | 11735504_a_at | turquoise | NLR family CARD domain containing 4(NLRC4)                                  | Homo sapiens |
| 2458 | 11735551_a_at | turquoise | Fc receptor like 6(FCRL6)                                                   | Homo sapiens |
| 2459 | 11735552_at   | turquoise | Fc receptor like 6(FCRL6)                                                   | Homo sapiens |
| 2460 | 11735623_a_at | turquoise | proteasome subunit beta 9(PSMB9)                                            | Homo sapiens |
| 2461 | 11735710_s_at | turquoise | SAM domain, SH3 domain and nuclear localization signals 1(SAMSN1)           | Homo sapiens |
| 2462 | 11735711_a_at | turquoise | casein kinase 1 gamma 2(CSNK1G2)                                            | Homo sapiens |
| 2463 | 11735712_x_at | turquoise | casein kinase 1 gamma 2(CSNK1G2)                                            | Homo sapiens |
| 2464 | 11735713_x_at | turquoise | casein kinase 1 gamma 2(CSNK1G2)                                            | Homo sapiens |
| 2465 | 11735732_a_at | turquoise | ribonuclease P/MRP subunit p14(RPP14)                                       | Homo sapiens |
| 2466 | 11735740_a_at | turquoise | RAS p21 protein activator 3(RASA3)                                          | Homo sapiens |
| 2467 | 11735741_s_at | turquoise | RAS p21 protein activator 3(RASA3)                                          | Homo sapiens |
| 2468 | 11735767_at   | turquoise | chromosome 16 open reading frame 54(C16orf54)                               | Homo sapiens |
| 2469 | 11735768_x_at | turquoise | chromosome 16 open reading frame 54(C16orf54)                               | Homo sapiens |
| 2470 | 11735790_x_at | turquoise | protein tyrosine phosphatase, non-receptor type 18(PTPN18)                  | Homo sapiens |
| 2471 | 11735864_a_at | turquoise | CD160 molecule(CD160)                                                       | Homo sapiens |
| 2472 | 11735937_a_at | turquoise | CD48 molecule(CD48)                                                         | Homo sapiens |
| 2473 | 11735956_at   | turquoise | methyltransferase like 11B(METTL11B)                                        | Homo sapiens |
| 2476 | 11735997_x_at | turquoise | apolipoprotein L1(APOL1)                                                    | Homo sapiens |
| 2477 | 11735998_a_at | turquoise | apolipoprotein L1(APOL1)                                                    | Homo sapiens |
| 2478 | 11736030_a_at | turquoise | microRNA 6787(MIR6787)                                                      | Homo sapiens |
| 2481 | 11736064_x_at | turquoise | purinergic receptor P2X 7(P2RX7)                                            | Homo sapiens |
| 2482 | 11736065_x_at | turquoise | purinergic receptor P2X 7(P2RX7)                                            | Homo sapiens |
| 2483 | 11736094_a_at | turquoise | dCMP deaminase(DCTD)                                                        | Homo sapiens |
| 2484 | 11736097_a_at | turquoise | golgi associated, gamma adaptin ear containing, ARF binding protein 1(GGA1) | Homo sapiens |
| 2485 | 11736111_a_at | turquoise | Rho GTPase activating protein 18(ARHGAP18)                                  | Homo sapiens |
| 2486 | 11736112_a_at | turquoise | Rho GTPase activating protein 18(ARHGAP18)                                  | Homo sapiens |
| 2487 | 11736113_at   | turquoise | Rho GTPase activating protein 18(ARHGAP18)                                  | Homo sapiens |
| 2488 | 11736132_s_at | turquoise | discoidin, CUB and LCCL domain containing 2(DCBLD2)                         | Homo sapiens |
| 2489 | 11736133_s_at | turquoise | PHD finger protein 19(PHF19)                                                | Homo sapiens |
| 2490 | 11736135_at   | turquoise | 2'-5'-oligoadenylate synthetase 2(OAS2)                                     | Homo sapiens |
| 2491 | 11736136_s_at | turquoise | 2'-5'-oligoadenylate synthetase 2(OAS2)                                     | Homo sapiens |
| 2492 | 11736207_a_at | turquoise | plexin C1(PLXNC1)                                                           | Homo sapiens |
| 2493 | 11736217_at   | turquoise | mitogen-activated protein kinase kinase kinase 8(MAP3K8)                    | Homo sapiens |
| 2494 | 11736224_x_at | turquoise | spermatogenesis associated serine rich 2(SPATS2)                            | Homo sapiens |
| 2495 | 11736225_a_at | turquoise | spermatogenesis associated serine rich 2(SPATS2)                            | Homo sapiens |
| 2496 | 11736233_s_at | turquoise | phosphotriesterase related(PTER)                                            | Homo sapiens |
| 2497 | 11736241_a_at | turquoise | ORMDL sphingolipid biosynthesis regulator 2(ORMDL2)                         | Homo sapiens |
| 2498 | 11736247_x_at | turquoise | adhesion molecule with Ig like domain 2(AMIGO2)                             | Homo sapiens |
| 2499 | 11736255_a_at | turquoise | inositol polyphosphate-4-phosphatase type I A(INPP4A)                       | Homo sapiens |
| 2500 | 11736273_a_at | turquoise | toll like receptor 2(TLR2)                                                  | Homo sapiens |
| 2502 | 11736297_a_at | turquoise | solute carrier family 5 member 1(SLC5A1)                                    | Homo sapiens |
| 2503 | 11736311_x_at | turquoise | Fc fragment of IgG receptor Ic, pseudogene(FCGR1CP)                         | Homo sapiens |
| 2504 | 11736324_x_at | turquoise | CD96 molecule(CD96)                                                         | Homo sapiens |
| 2505 | 11736330_a_at | turquoise | solute carrier family 2 member 11(SLC2A11)                                  | Homo sapiens |
| 2506 | 11736342_at   | turquoise | early growth response 3(EGR3)                                               | Homo sapiens |
| 2507 | 11736375_a_at | turquoise | CD86 molecule(CD86)                                                         | Homo sapiens |
| 2508 | 11736376_a_at | turquoise | membrane palmitoylated protein 3(MPP3)                                      | Homo sapiens |
| 2509 | 11736378_a_at | turquoise | male-specific lethal 2 homolog (Drosophila)(MSL2)                           | Homo sapiens |
| 2510 | 11736394_x_at | turquoise | interleukin 32(IL32)                                                        | Homo sapiens |
| 2511 | 11736405_a_at | turquoise | DNA methyltransferase 1(DNMT1)                                              | Homo sapiens |
| 2512 | 11736409_a_at | turquoise | nucleoporin 62(NUP62)                                                       | Homo sapiens |
| 2513 | 11736414_a_at | turquoise | melanotransferrin(MELTF)                                                    | Homo sapiens |
| 2514 | 11736419_a_at | turquoise | zinc finger protein 800(ZNF800)                                             | Homo sapiens |
| 2515 | 11736430_a_at | turquoise | nucleolar protein 8(NOL8)                                                   | Homo sapiens |
| 2517 | 11736457_at   | turquoise | potassium two pore domain channel subfamily K member 6(KCNK6)               | Homo sapiens |
| 2518 | 11736458_x_at | turquoise | potassium two pore domain channel subfamily K member 6(KCNK6)               | Homo sapiens |
| 2519 | 11736467_a_at | turquoise | T-cell activation RhoGTPase activating protein(TAGAP)                       | Homo sapiens |
| 2520 | 11736499_at   | turquoise | transmembrane protein 38A(TMEM38A)                                          | Homo sapiens |
| 2521 | 11736519_x_at | turquoise | chromosome X open reading frame 38(CXorf38)                                 | Homo sapiens |
| 2522 | 11736526_a_at | turquoise | caspase recruitment domain family member 9(CARD9)                           | Homo sapiens |
| 2523 | 11736539_x_at | turquoise | RAB29, member RAS oncogene family(RAB29)                                    | Homo sapiens |
| 2524 | 11736550_x_at | turquoise | RAB29, member RAS oncogene family(RAB29)                                    | Homo sapiens |
| 2525 | 11736551_x_at | turquoise | REL proto-oncogene, NF-kB subunit(REL)                                      | Homo sapiens |
| 2526 | 11736555_s_at | turquoise | solute carrier family 2 member 14(SLC2A14)                                  | Homo sapiens |
| 2527 | 11736556_s_at | turquoise | solute carrier family 2 member 14(SLC2A14)                                  | Homo sapiens |
| 2528 | 11736567_a_at | turquoise | lymphoid enhancer binding factor 1(LEF1)                                    | Homo sapiens |
| 2529 | 11736568_x_at | turquoise | lymphoid enhancer binding factor 1(LEF1)                                    | Homo sapiens |

|      |               |           |                                                                    |              |
|------|---------------|-----------|--------------------------------------------------------------------|--------------|
| 2530 | 11736573_a_at | turquoise | protein kinase C delta(PRKCD)                                      | Homo sapiens |
| 2531 | 11736578_a_at | turquoise | adaptor related protein complex 1 gamma 2 subunit(AP1G2)           | Homo sapiens |
| 2532 | 11736581_a_at | turquoise | glucosaminyl (N-acetyl) transferase 1, core 2(GCNT1)               | Homo sapiens |
| 2534 | 11736590_a_at | turquoise | receptor activity modifying protein 3(RAMP3)                       | Homo sapiens |
| 2535 | 11736594_x_at | turquoise | zinc finger and BTB domain containing 24(ZBTB24)                   | Homo sapiens |
| 2536 | 11736619_a_at | turquoise | aldehyde dehydrogenase 5 family member A1(ALDH5A1)                 | Homo sapiens |
| 2537 | 11736637_s_at | turquoise | DENN domain containing 4A(DENND4A)                                 | Homo sapiens |
| 2538 | 11736641_x_at | turquoise | mitochondrial trans-2-enoyl-CoA reductase(MECR)                    | Homo sapiens |
| 2539 | 11736683_a_at | turquoise | cytoplasmic FMR1 interacting protein 1(CYFIP1)                     | Homo sapiens |
| 2540 | 11736693_a_at | turquoise | tripartite motif containing 38(TRIM38)                             | Homo sapiens |
| 2541 | 11736694_x_at | turquoise | tripartite motif containing 38(TRIM38)                             | Homo sapiens |
| 2542 | 11736705_x_at | turquoise | HP55, biogenesis of lysosomal organelles complex 2 subunit 2(HP55) | Homo sapiens |
| 2543 | 11736710_a_at | turquoise | DENN domain containing 4A(DENND4A)                                 | Homo sapiens |
| 2544 | 11736742_a_at | turquoise | chromosome 1 open reading frame 168(C1orf168)                      | Homo sapiens |
| 2545 | 11736746_a_at | turquoise | ADAM metallopeptidase domain 28(ADAM28)                            | Homo sapiens |
| 2546 | 11736747_x_at | turquoise | ADAM metallopeptidase domain 28(ADAM28)                            | Homo sapiens |
| 2547 | 11736760_a_at | turquoise | FK506 binding protein 11(FKBP11)                                   | Homo sapiens |
| 2548 | 11736761_a_at | turquoise | caspase recruitment domain family member 16(CARD16)                | Homo sapiens |
| 2550 | 11736813_a_at | turquoise | programmed cell death 1 ligand 2(PDCD1LG2)                         | Homo sapiens |
| 2551 | 11736831_a_at | turquoise | Sec23 homolog B, coat complex II component(SEC23B)                 | Homo sapiens |
| 2553 | 11736888_x_at | turquoise | integrin subunit alpha L(ITGAL)                                    | Homo sapiens |
| 2555 | 11736973_a_at | turquoise | T-box 5(TBX5)                                                      | Homo sapiens |
| 2556 | 11737026_at   | turquoise | iroquois homeobox 4(IRX4)                                          | Homo sapiens |
| 2557 | 11737027_x_at | turquoise | fms related tyrosine kinase 3(FLT3)                                | Homo sapiens |
| 2558 | 11737038_at   | turquoise | chromosome 19 open reading frame 38(C19orf38)                      | Homo sapiens |
| 2559 | 11737050_x_at | turquoise | histamine receptor H1(HRH1)                                        | Homo sapiens |
| 2560 | 11737058_a_at | turquoise | pantothenate kinase 2(PANK2)                                       | Homo sapiens |
| 2561 | 11737131_at   | turquoise | fat storage inducing transmembrane protein 2(FITM2)                | Homo sapiens |
| 2562 | 11737146_a_at | turquoise | suppressor of cytokine signaling 1(SOCS1)                          | Homo sapiens |
| 2563 | 11737147_x_at | turquoise | C-type lectin domain family 7 member A(CLEC7A)                     | Homo sapiens |
| 2564 | 11737148_x_at | turquoise | C-type lectin domain family 7 member A(CLEC7A)                     | Homo sapiens |
| 2565 | 11737160_at   | turquoise | perilipin 5(PLIN5)                                                 | Homo sapiens |
| 2566 | 11737171_at   | turquoise | CD80 molecule(CD80)                                                | Homo sapiens |
| 2567 | 11737237_a_at | turquoise | eomesodermin(EOMES)                                                | Homo sapiens |
| 2568 | 11737238_s_at | turquoise | eomesodermin(EOMES)                                                | Homo sapiens |
| 2569 | 11737239_x_at | turquoise | eomesodermin(EOMES)                                                | Homo sapiens |
| 2571 | 11737250_at   | turquoise | interleukin 1 receptor accessory protein like 1(IL1RAPL1)          | Homo sapiens |
| 2572 | 11737256_at   | turquoise | SP100 nuclear antigen(SP100)                                       | Homo sapiens |
| 2574 | 11737322_a_at | turquoise | phospholipase D1(PLD1)                                             | Homo sapiens |
| 2575 | 11737423_a_at | turquoise | NLR family pyrin domain containing 1(NLRP1)                        | Homo sapiens |
| 2576 | 11737428_a_at | turquoise | macrophage scavenger receptor 1(MSR1)                              | Homo sapiens |
| 2577 | 11737429_x_at | turquoise | macrophage scavenger receptor 1(MSR1)                              | Homo sapiens |
| 2578 | 11737464_a_at | turquoise | interleukin 11 receptor subunit alpha(IL11RA)                      | Homo sapiens |
| 2579 | 11737484_at   | turquoise | chromosome 9 open reading frame 129(C9orf129)                      | Homo sapiens |
| 2580 | 11737496_a_at | turquoise | CD200 receptor 1(CD200R1)                                          | Homo sapiens |
| 2581 | 11737504_x_at | turquoise | signal regulatory protein beta 2(SIRPB2)                           | Homo sapiens |
| 2582 | 11737511_a_at | turquoise | SP100 nuclear antigen(SP100)                                       | Homo sapiens |
| 2583 | 11737555_s_at | turquoise | nudix hydrolase 17(NUDT17)                                         | Homo sapiens |
| 2584 | 11737750_s_at | turquoise | serum/glucocorticoid regulated kinase 1(SGK1)                      | Homo sapiens |
| 2585 | 11737757_a_at | turquoise | cysteinyl-tRNA synthetase(CARS)                                    | Homo sapiens |
| 2586 | 11737758_x_at | turquoise | cysteinyl-tRNA synthetase(CARS)                                    | Homo sapiens |
| 2587 | 11737770_a_at | turquoise | apolipoprotein L4(APOL4)                                           | Homo sapiens |
| 2588 | 11737791_s_at | turquoise | apolipoprotein L2(APOL2)                                           | Homo sapiens |
| 2590 | 11737847_a_at | turquoise | major histocompatibility complex, class I-related(MR1)             | Homo sapiens |
| 2591 | 11737851_a_at | turquoise | protein phosphatase 1 regulatory subunit 18(PPP1R18)               | Homo sapiens |
| 2592 | 11737852_s_at | turquoise | protein phosphatase 1 regulatory subunit 18(PPP1R18)               | Homo sapiens |
| 2593 | 11737890_x_at | turquoise | linker for activation of T-cells family member 2(LAT2)             | Homo sapiens |
| 2594 | 11737907_s_at | turquoise | protein phosphatase 1 catalytic subunit alpha(PPP1CA)              | Homo sapiens |
| 2595 | 11737911_a_at | turquoise | G protein-coupled receptor 84(GPR84)                               | Homo sapiens |
| 2596 | 11737940_s_at | turquoise | receptor interacting serine/threonine kinase 1(RIPK1)              | Homo sapiens |
| 2597 | 11737952_a_at | turquoise | ral guanine nucleotide dissociation stimulator(RALGDS)             | Homo sapiens |
| 2598 | 11737975_x_at | turquoise | p21 (RAC1) activated kinase 6(PAK6)                                | Homo sapiens |
| 2599 | 11737980_a_at | turquoise | DAN domain BMP antagonist family member 5(DAND5)                   | Homo sapiens |
| 2601 | 11738021_a_at | turquoise | phospholipase C beta 4(PLCB4)                                      | Homo sapiens |
| 2602 | 11738053_x_at | turquoise | plasminogen activator, urokinase receptor(PLAUR)                   | Homo sapiens |
| 2604 | 11738124_x_at | turquoise | sialic acid binding Ig like lectin 10(SIGLEC10)                    | Homo sapiens |
| 2605 | 11738139_s_at | turquoise | kelch like family member 33(KLHL33)                                | Homo sapiens |
| 2606 | 11738168_a_at | turquoise | basic leucine zipper ATF-like transcription factor 3(BATF3)        | Homo sapiens |
| 2607 | 11738183_a_at | turquoise | NLR family pyrin domain containing 3(NLRP3)                        | Homo sapiens |
| 2608 | 11738193_a_at | turquoise | paired like homeodomain 3(PITX3)                                   | Homo sapiens |
| 2609 | 11738202_x_at | turquoise | death domain associated protein(DAXX)                              | Homo sapiens |
| 2610 | 11738203_x_at | turquoise | inosine monophosphate dehydrogenase 1(IMPDH1)                      | Homo sapiens |
| 2611 | 11738268_a_at | turquoise | family with sequence similarity 122C(FAM122C)                      | Homo sapiens |
| 2613 | 11738335_x_at | turquoise | tumor protein p53(TP53)                                            | Homo sapiens |
| 2614 | 11738435_x_at | turquoise | CD74 molecule(CD74)                                                | Homo sapiens |
| 2615 | 11738460_at   | turquoise | NUT family member 2G(NUTM2G)                                       | Homo sapiens |
| 2616 | 11738516_s_at | turquoise | zinc finger CCHC-type containing 6(ZCCHC6)                         | Homo sapiens |
| 2617 | 11738523_a_at | turquoise | NLR family pyrin domain containing 3(NLRP3)                        | Homo sapiens |
| 2618 | 11738540_a_at | turquoise | HHIP like 1(HHIP1)                                                 | Homo sapiens |
| 2619 | 11738656_a_at | turquoise | PARK2 coregulated(PACRG)                                           | Homo sapiens |
| 2620 | 11738799_x_at | turquoise | ninein(NIN)                                                        | Homo sapiens |
| 2621 | 11738807_s_at | turquoise | c-Maf inducing protein(CMIP)                                       | Homo sapiens |

|      |               |           |                                                                                                |              |
|------|---------------|-----------|------------------------------------------------------------------------------------------------|--------------|
| 2622 | 11738858_x_at | turquoise | colony stimulating factor 2 receptor alpha subunit(CSF2RA)                                     | Homo sapiens |
| 2623 | 11738863_a_at | turquoise | protein tyrosine phosphatase, non-receptor type 2(PTPN2)                                       | Homo sapiens |
| 2624 | 11738883_x_at | turquoise | tumor necrosis factor superfamily member 14(TNFSF14)                                           | Homo sapiens |
| 2625 | 11738884_x_at | turquoise | caspase 1(CASP1)                                                                               | Homo sapiens |
| 2626 | 11738900_x_at | turquoise | small nucleolar RNA, C/D box 139(SNORD139)                                                     | Homo sapiens |
| 2627 | 11738935_a_at | turquoise | killer cell lectin like receptor C3(KLRC3)                                                     | Homo sapiens |
| 2628 | 11738980_a_at | turquoise | CD4 molecule(CD4)                                                                              | Homo sapiens |
| 2629 | 11738981_x_at | turquoise | CD4 molecule(CD4)                                                                              | Homo sapiens |
| 2630 | 11738982_at   | turquoise | CD4 molecule(CD4)                                                                              | Homo sapiens |
| 2631 | 11739005_at   | turquoise | capping actin protein of muscle Z-line alpha subunit 1(CAPZA1)                                 | Homo sapiens |
| 2632 | 11739006_x_at | turquoise | capping actin protein of muscle Z-line alpha subunit 1(CAPZA1)                                 | Homo sapiens |
| 2633 | 11739007_at   | turquoise | capping actin protein of muscle Z-line alpha subunit 1(CAPZA1)                                 | Homo sapiens |
| 2634 | 11739008_x_at | turquoise | capping actin protein of muscle Z-line alpha subunit 1(CAPZA1)                                 | Homo sapiens |
| 2635 | 11739009_a_at | turquoise | myosin heavy chain 9(MYH9)                                                                     | Homo sapiens |
| 2636 | 11739019_x_at | turquoise | RAB5C, member RAS oncogene family(RAB5C)                                                       | Homo sapiens |
| 2637 | 11739024_s_at | turquoise | adenosine deaminase, RNA specific(ADAR)                                                        | Homo sapiens |
| 2638 | 11739028_s_at | turquoise | clathrin heavy chain(CLTC)                                                                     | Homo sapiens |
| 2639 | 11739031_s_at | turquoise | ARP2 actin related protein 2 homolog(ACTR2)                                                    | Homo sapiens |
| 2640 | 11739032_x_at | turquoise | ARP2 actin related protein 2 homolog(ACTR2)                                                    | Homo sapiens |
| 2641 | 11739043_a_at | turquoise | LIM domain kinase 2(LIMK2)                                                                     | Homo sapiens |
| 2642 | 11739046_s_at | turquoise | multimerin 2(MMRN2)                                                                            | Homo sapiens |
| 2643 | 11739052_a_at | turquoise | solute carrier organic anion transporter family member 2B1(SLCO2B1)                            | Homo sapiens |
| 2644 | 11739053_a_at | turquoise | solute carrier organic anion transporter family member 2B1(SLCO2B1)                            | Homo sapiens |
| 2645 | 11739054_a_at | turquoise | protein tyrosine phosphatase, non-receptor type 6(PTPN6)                                       | Homo sapiens |
| 2646 | 11739055_x_at | turquoise | protein tyrosine phosphatase, non-receptor type 6(PTPN6)                                       | Homo sapiens |
| 2648 | 11739075_a_at | turquoise | nuclear factor, erythroid 2 like 1(NFE2L1)                                                     | Homo sapiens |
| 2649 | 11739094_a_at | turquoise | C-X-C motif chemokine receptor 4(CXCR4)                                                        | Homo sapiens |
| 2650 | 11739113_a_at | turquoise | ADP dependent glucokinase(ADPGK)                                                               | Homo sapiens |
| 2651 | 11739118_a_at | turquoise | canopy FGF signaling regulator 3(CNPY3)                                                        | Homo sapiens |
| 2652 | 11739119_s_at | turquoise | canopy FGF signaling regulator 3(CNPY3)                                                        | Homo sapiens |
| 2653 | 11739142_x_at | turquoise | heterogeneous nuclear ribonucleoprotein F(HNRNPF)                                              | Homo sapiens |
| 2654 | 11739148_a_at | turquoise | SAM and HD domain containing deoxynucleoside triphosphate triphosphohydrolase 1(SAMHD1)        | Homo sapiens |
| 2655 | 11739149_a_at | turquoise | SAM and HD domain containing deoxynucleoside triphosphate triphosphohydrolase 1(SAMHD1)        | Homo sapiens |
| 2656 | 11739157_a_at | turquoise | thioredoxin related transmembrane protein 4(TMX4)                                              | Homo sapiens |
| 2657 | 11739168_a_at | turquoise | GTPase, IMAP family member 6(GIMAP6)                                                           | Homo sapiens |
| 2659 | 11739202_a_at | turquoise | ATP synthase, H+ transporting, mitochondrial Fo complex subunit C3 (subunit 9)(ATP5G3)         | Homo sapiens |
| 2660 | 11739223_s_at | turquoise | neurofibromin 1 pseudogene 9(NF1P9)                                                            | Homo sapiens |
| 2661 | 11739230_a_at | turquoise | ADP ribosylation factor like GTPase 4A(ARL4A)                                                  | Homo sapiens |
| 2662 | 11739232_x_at | turquoise | Ras association domain family member 2(RASSF2)                                                 | Homo sapiens |
| 2663 | 11739262_a_at | turquoise | vacuolar protein sorting 4 homolog B(VPS4B)                                                    | Homo sapiens |
| 2664 | 11739280_a_at | turquoise | C-X-C motif chemokine ligand 16(CXCL16)                                                        | Homo sapiens |
| 2665 | 11739285_a_at | turquoise | ADP ribosylation factor like GTPase 6 interacting protein 6(ARL6IP6)                           | Homo sapiens |
| 2666 | 11739298_a_at | turquoise | LRR binding FLII interacting protein 1(LRRFIP1)                                                | Homo sapiens |
| 2668 | 11739334_a_at | turquoise | protein tyrosine phosphatase, receptor type C(PTPRC)                                           | Homo sapiens |
| 2670 | 11739346_s_at | turquoise | TNF receptor superfamily member 1A(TNFRSF1A)                                                   | Homo sapiens |
| 2671 | 11739347_a_at | turquoise | phosphatidylinositol-5-phosphate 4-kinase type 2 alpha(PIP4K2A)                                | Homo sapiens |
| 2672 | 11739348_a_at | turquoise | phosphatidylinositol-5-phosphate 4-kinase type 2 alpha(PIP4K2A)                                | Homo sapiens |
| 2673 | 11739349_a_at | turquoise | angiominin(AMOT)                                                                               | Homo sapiens |
| 2674 | 11739364_s_at | turquoise | family with sequence similarity 92 member A(FAM92A)                                            | Homo sapiens |
| 2675 | 11739375_at   | turquoise | synaptotagmin 7(SYT7)                                                                          | Homo sapiens |
| 2676 | 11739392_a_at | turquoise | recombination signal binding protein for immunoglobulin kappa J region(RBPJ)                   | Homo sapiens |
| 2677 | 11739400_s_at | turquoise | F-box protein 7(FBXO7)                                                                         | Homo sapiens |
| 2678 | 11739401_a_at | turquoise | CD74 molecule(CD74)                                                                            | Homo sapiens |
| 2679 | 11739419_a_at | turquoise | uncharacterized LOC100130460(CAND1.11)                                                         | Homo sapiens |
| 2681 | 11739452_a_at | turquoise | malic enzyme 2(ME2)                                                                            | Homo sapiens |
| 2683 | 11739465_x_at | turquoise | alkB homolog 4, lysine demethylase(ALKBH4)                                                     | Homo sapiens |
| 2684 | 11739470_at   | turquoise | transmembrane protein 87B(TMEM87B)                                                             | Homo sapiens |
| 2685 | 11739482_x_at | turquoise | placenta specific 8(PLAC8)                                                                     | Homo sapiens |
| 2686 | 11739484_a_at | turquoise | coiled-coil domain containing 88A(CCDC88A)                                                     | Homo sapiens |
| 2687 | 11739487_s_at | turquoise | SUZ12 polycomb repressive complex 2 subunit(SUZ12)                                             | Homo sapiens |
| 2688 | 11739489_a_at | turquoise | ATPase phospholipid transporting 10D (putative)(ATP10D)                                        | Homo sapiens |
| 2689 | 11739492_a_at | turquoise | mannosyl (alpha-1,3-)-glycoprotein beta-1,4-N-acetylglucosaminyltransferase, isozyme A(MGAT4A) | Homo sapiens |
| 2690 | 11739493_a_at | turquoise | mannosyl (alpha-1,3-)-glycoprotein beta-1,4-N-acetylglucosaminyltransferase, isozyme A(MGAT4A) | Homo sapiens |
| 2691 | 11739494_a_at | turquoise | mannosyl (alpha-1,3-)-glycoprotein beta-1,4-N-acetylglucosaminyltransferase, isozyme A(MGAT4A) | Homo sapiens |
| 2694 | 11739507_a_at | turquoise | PBX homeobox 3(PBX3)                                                                           | Homo sapiens |
| 2697 | 11739521_at   | turquoise | ST8 alpha-N-acetyl-neuraminide alpha-2,8-sialyltransferase 4(ST8SIA4)                          | Homo sapiens |
| 2698 | 11739522_at   | turquoise | ST8 alpha-N-acetyl-neuraminide alpha-2,8-sialyltransferase 4(ST8SIA4)                          | Homo sapiens |
| 2699 | 11739527_a_at | turquoise | secreted and transmembrane 1(SECTM1)                                                           | Homo sapiens |
| 2700 | 11739557_a_at | turquoise | vesicle associated membrane protein 5(VAMP5)                                                   | Homo sapiens |
| 2701 | 11739558_at   | turquoise | ring finger and WD repeat domain 3(RFWD3)                                                      | Homo sapiens |
| 2702 | 11739576_x_at | turquoise | HP55, biogenesis of lysosomal organelles complex 2 subunit 2(HP55)                             | Homo sapiens |
| 2703 | 11739581_at   | turquoise | protein kinase D3(PRKD3)                                                                       | Homo sapiens |
| 2704 | 11739583_s_at | turquoise | protein kinase D3(PRKD3)                                                                       | Homo sapiens |
| 2705 | 11739584_s_at | turquoise | protein kinase D3(PRKD3)                                                                       | Homo sapiens |
| 2706 | 11739586_a_at | turquoise | chloride voltage-gated channel 3(CLCN3)                                                        | Homo sapiens |
| 2707 | 11739606_x_at | turquoise | coiled-coil domain containing 88A(CCDC88A)                                                     | Homo sapiens |
| 2708 | 11739610_a_at | turquoise | calmodulin like 4(CALML4)                                                                      | Homo sapiens |
| 2709 | 11739617_x_at | turquoise | CD44 molecule (Indian blood group)(CD44)                                                       | Homo sapiens |
| 2710 | 11739654_at   | turquoise | TNF receptor superfamily member 10a(TNFRSF10A)                                                 | Homo sapiens |
| 2711 | 11739657_a_at | turquoise | lymphotoxin beta(LTB)                                                                          | Homo sapiens |
| 2712 | 11739658_a_at | turquoise | lymphotoxin beta(LTB)                                                                          | Homo sapiens |
| 2713 | 11739666_a_at | turquoise | RUN and cysteine rich domain containing beclin 1 interacting protein(RUBCN)                    | Homo sapiens |

|      |               |           |                                                                                |              |
|------|---------------|-----------|--------------------------------------------------------------------------------|--------------|
| 2714 | 11739667_at   | turquoise | polypeptide N-acetylgalactosaminyltransferase 6(GALNT6)                        | Homo sapiens |
| 2715 | 11739670_at   | turquoise | GRB2-related adaptor protein(GRAP)                                             | Homo sapiens |
| 2716 | 11739672_x_at | turquoise | zinc finger protein 253(ZNF253)                                                | Homo sapiens |
| 2717 | 11739681_x_at | turquoise | aryl hydrocarbon receptor(AHR)                                                 | Homo sapiens |
| 2718 | 11739687_a_at | turquoise | family with sequence similarity 107 member B(FAM107B)                          | Homo sapiens |
| 2719 | 11739688_a_at | turquoise | family with sequence similarity 107 member B(FAM107B)                          | Homo sapiens |
| 2720 | 11739730_at   | turquoise | casein kinase 1 gamma 1(CSNK1G1)                                               | Homo sapiens |
| 2721 | 11739731_s_at | turquoise | casein kinase 1 gamma 1(CSNK1G1)                                               | Homo sapiens |
| 2722 | 11739739_a_at | turquoise | interleukin 21 receptor(IL21R)                                                 | Homo sapiens |
| 2723 | 11739740_a_at | turquoise | interleukin 21 receptor(IL21R)                                                 | Homo sapiens |
| 2725 | 11739753_a_at | turquoise | SLAM family member 8(SLAMF8)                                                   | Homo sapiens |
| 2726 | 11739754_at   | turquoise | SLAM family member 8(SLAMF8)                                                   | Homo sapiens |
| 2727 | 11739767_a_at | turquoise | protein tyrosine phosphatase, receptor type E(PTPRE)                           | Homo sapiens |
| 2728 | 11739768_a_at | turquoise | protein tyrosine phosphatase, receptor type E(PTPRE)                           | Homo sapiens |
| 2729 | 11739796_a_at | turquoise | rhomboid 5 homolog 2(RHBDF2)                                                   | Homo sapiens |
| 2731 | 11739825_a_at | turquoise | DnaJ heat shock protein family (Hsp40) member B12(DNAJB12)                     | Homo sapiens |
| 2732 | 11739828_s_at | turquoise | cystin 1(CYS1)                                                                 | Homo sapiens |
| 2733 | 11739845_a_at | turquoise | macrophage scavenger receptor 1(MSR1)                                          | Homo sapiens |
| 2734 | 11739846_a_at | turquoise | macrophage scavenger receptor 1(MSR1)                                          | Homo sapiens |
| 2735 | 11739847_x_at | turquoise | macrophage scavenger receptor 1(MSR1)                                          | Homo sapiens |
| 2737 | 11739859_a_at | turquoise | protein kinase C and casein kinase substrate in neurons 1(PACSN1)              | Homo sapiens |
| 2738 | 11739862_a_at | turquoise | integrator complex subunit 6 like(INTS6L)                                      | Homo sapiens |
| 2739 | 11739863_a_at | turquoise | transcription termination factor 2(TTF2)                                       | Homo sapiens |
| 2740 | 11739864_x_at | turquoise | transcription termination factor 2(TTF2)                                       | Homo sapiens |
| 2741 | 11739877_x_at | turquoise | basigin (Ok blood group)(BSG)                                                  | Homo sapiens |
| 2743 | 11739917_a_at | turquoise | casein kinase 1 delta(CSNK1D)                                                  | Homo sapiens |
| 2744 | 11739941_s_at | turquoise | SUMO1/sentrin specific peptidase 1(SENP1)                                      | Homo sapiens |
| 2745 | 11739944_x_at | turquoise | neuroblastoma breakpoint family member 10(NBPF10)                              | Homo sapiens |
| 2746 | 11740006_a_at | turquoise | KIAA0895(KIAA0895)                                                             | Homo sapiens |
| 2747 | 11740035_s_at | turquoise | caspase recruitment domain family member 8(CARD8)                              | Homo sapiens |
| 2748 | 11740036_at   | turquoise | caspase recruitment domain family member 8(CARD8)                              | Homo sapiens |
| 2749 | 11740038_s_at | turquoise | ankyrin repeat domain 36(ANKRD36)                                              | Homo sapiens |
| 2752 | 11740061_a_at | turquoise | c-src tyrosine kinase(CSK)                                                     | Homo sapiens |
| 2753 | 11740065_at   | turquoise | interleukin 17 receptor A(IL17RA)                                              | Homo sapiens |
| 2754 | 11740077_a_at | turquoise | discs large MAGUK scaffold protein 2(DLG2)                                     | Homo sapiens |
| 2755 | 11740080_at   | turquoise | chromosome X open reading frame 21(CXorf21)                                    | Homo sapiens |
| 2756 | 11740144_a_at | turquoise | centrosomal protein 164(CEP164)                                                | Homo sapiens |
| 2757 | 11740145_a_at | turquoise | centrosomal protein 164(CEP164)                                                | Homo sapiens |
| 2758 | 11740162_a_at | turquoise | ArfGAP with RhoGAP domain, ankyrin repeat and PH domain 1(ARAP1)               | Homo sapiens |
| 2759 | 11740197_s_at | turquoise | isoprenoid synthase domain containing(ISPD)                                    | Homo sapiens |
| 2760 | 11740212_x_at | turquoise | phosphatidylinositol-4,5-bisphosphate 3-kinase catalytic subunit gamma(PIK3CG) | Homo sapiens |
| 2761 | 11740238_a_at | turquoise | sulfatase 2(SULF2)                                                             | Homo sapiens |
| 2762 | 11740282_a_at | turquoise | tRNA splicing endonuclease subunit 2(TSEN2)                                    | Homo sapiens |
| 2763 | 11740302_a_at | turquoise | parvin gamma(PARVG)                                                            | Homo sapiens |
| 2764 | 11740370_a_at | turquoise | RAS guanyl releasing protein 1(RASGRP1)                                        | Homo sapiens |
| 2765 | 11740375_a_at | turquoise | regulator of G-protein signaling 10(RGS10)                                     | Homo sapiens |
| 2766 | 11740378_a_at | turquoise | aftiphilin(AFTPH)                                                              | Homo sapiens |
| 2767 | 11740390_a_at | turquoise | RNA binding motif protein 47(RBM47)                                            | Homo sapiens |
| 2768 | 11740393_at   | turquoise | TNF receptor superfamily member 9(TNFRSF9)                                     | Homo sapiens |
| 2769 | 11740411_a_at | turquoise | protein kinase D2(PRKD2)                                                       | Homo sapiens |
| 2770 | 11740412_x_at | turquoise | protein kinase D2(PRKD2)                                                       | Homo sapiens |
| 2771 | 11740429_s_at | turquoise | 5'-3' exoribonuclease 1(XRN1)                                                  | Homo sapiens |
| 2772 | 11740444_s_at | turquoise | E74 like ETS transcription factor 1(ELF1)                                      | Homo sapiens |
| 2773 | 11740447_x_at | turquoise | butyrophilin subfamily 3 member A1(BTN3A1)                                     | Homo sapiens |
| 2774 | 11740450_a_at | turquoise | killer cell lectin like receptor D1(KLRD1)                                     | Homo sapiens |
| 2775 | 11740451_a_at | turquoise | killer cell lectin like receptor D1(KLRD1)                                     | Homo sapiens |
| 2776 | 11740452_x_at | turquoise | killer cell lectin like receptor D1(KLRD1)                                     | Homo sapiens |
| 2777 | 11740465_at   | turquoise | G protein-coupled receptor 171(GPR171)                                         | Homo sapiens |
| 2778 | 11740486_a_at | turquoise | runt related transcription factor 3(RUNX3)                                     | Homo sapiens |
| 2779 | 11740499_a_at | turquoise | chromobox 5(CBX5)                                                              | Homo sapiens |
| 2781 | 11740531_a_at | turquoise | C-type lectin domain family 10 member A(CLEC10A)                               | Homo sapiens |
| 2782 | 11740594_s_at | turquoise | histone cluster 1 H3 family member e(HIST1H3E)                                 | Homo sapiens |
| 2783 | 11740606_a_at | turquoise | hydroxylysine kinase(HYKK)                                                     | Homo sapiens |
| 2784 | 11740616_a_at | turquoise | parkin RBR E3 ubiquitin protein ligase(PARK2)                                  | Homo sapiens |
| 2785 | 11740617_x_at | turquoise | parkin RBR E3 ubiquitin protein ligase(PARK2)                                  | Homo sapiens |
| 2786 | 11740621_a_at | turquoise | lysine demethylase 2B(KDM2B)                                                   | Homo sapiens |
| 2787 | 11740657_a_at | turquoise | solute carrier family 22 member 5(SLC22A5)                                     | Homo sapiens |
| 2788 | 11740672_x_at | turquoise | COX15, cytochrome c oxidase assembly homolog(COX15)                            | Homo sapiens |
| 2789 | 11740677_a_at | turquoise | GDP dissociation inhibitor 2(GDI2)                                             | Homo sapiens |
| 2790 | 11740681_a_at | turquoise | TGF $\beta$ induced factor homeobox 1(TGIF1)                                   | Homo sapiens |
| 2791 | 11740691_x_at | turquoise | allograft inflammatory factor 1(AIF1)                                          | Homo sapiens |
| 2794 | 11740748_s_at | turquoise | MYC associated factor X(MAX)                                                   | Homo sapiens |
| 2795 | 11740752_a_at | turquoise | folate receptor beta(FOLR2)                                                    | Homo sapiens |
| 2796 | 11740758_a_at | turquoise | mir-99a-let-7c cluster host gene(MIR99AHG)                                     | Homo sapiens |
| 2797 | 11740801_a_at | turquoise | acyl-CoA dehydrogenase family member 10(ACAD10)                                | Homo sapiens |
| 2798 | 11740821_a_at | turquoise | CD1e molecule(CD1E)                                                            | Homo sapiens |
| 2799 | 11740825_a_at | turquoise | thymus, brain and testes associated(TBATA)                                     | Homo sapiens |
| 2800 | 11740829_at   | turquoise | synapse defective Rho GTPase homolog 2(SYDE2)                                  | Homo sapiens |
| 2801 | 11740871_a_at | turquoise | membrane spanning 4-domains A7(MS4A7)                                          | Homo sapiens |
| 2802 | 11740872_a_at | turquoise | membrane spanning 4-domains A7(MS4A7)                                          | Homo sapiens |
| 2803 | 11740873_x_at | turquoise | membrane spanning 4-domains A7(MS4A7)                                          | Homo sapiens |
| 2804 | 11740874_a_at | turquoise | FES proto-oncogene, tyrosine kinase(FES)                                       | Homo sapiens |

|      |               |           |                                                                     |              |
|------|---------------|-----------|---------------------------------------------------------------------|--------------|
| 2805 | 11740879_s_at | turquoise | annexin A2(ANXA2)                                                   | Homo sapiens |
| 2806 | 11740880_x_at | turquoise | annexin A2(ANXA2)                                                   | Homo sapiens |
| 2807 | 11740881_x_at | turquoise | interleukin 15(IL15)                                                | Homo sapiens |
| 2808 | 11740885_a_at | turquoise | oxysterol binding protein like 3(OSBPL3)                            | Homo sapiens |
| 2809 | 11740890_a_at | turquoise | ADAM metallopeptidase domain 28(ADAM28)                             | Homo sapiens |
| 2810 | 11740891_a_at | turquoise | 2'-5'-oligoadenylate synthetase 1(OAS1)                             | Homo sapiens |
| 2811 | 11740934_a_at | turquoise | nucleolar and spindle associated protein 1(NUSAP1)                  | Homo sapiens |
| 2812 | 11740937_x_at | turquoise | lipoic acid synthetase(LIAS)                                        | Homo sapiens |
| 2813 | 11740938_a_at | turquoise | TGFβ induced factor homeobox 1(TGIF1)                               | Homo sapiens |
| 2814 | 11740957_x_at | turquoise | solute carrier family 2 member 6(SLC2A6)                            | Homo sapiens |
| 2815 | 11740958_x_at | turquoise | centrosomal protein 63(CEP63)                                       | Homo sapiens |
| 2816 | 11740961_a_at | turquoise | CD33 molecule(CD33)                                                 | Homo sapiens |
| 2817 | 11740971_x_at | turquoise | Ras and Rab interactor like(RINL)                                   | Homo sapiens |
| 2818 | 11740974_a_at | turquoise | cytoplasmic FMR1 interacting protein 1(CYFIP1)                      | Homo sapiens |
| 2819 | 11740979_x_at | turquoise | LCK proto-oncogene, Src family tyrosine kinase(LCK)                 | Homo sapiens |
| 2821 | 11740992_x_at | turquoise | microRNA 6837(MIR6837)                                              | Homo sapiens |
| 2822 | 11740997_a_at | turquoise | TRAF-type zinc finger domain containing 1(TRAFD1)                   | Homo sapiens |
| 2823 | 11740998_a_at | turquoise | diacylglycerol kinase alpha(DGKA)                                   | Homo sapiens |
| 2824 | 11741016_a_at | turquoise | adaptor related protein complex 2 alpha 2 subunit(AP2A2)            | Homo sapiens |
| 2825 | 11741030_a_at | turquoise | pentatricopeptide repeat domain 2(PTCD2)                            | Homo sapiens |
| 2827 | 11741035_a_at | turquoise | ribosomal protein S6 kinase A1(RPS6KA1)                             | Homo sapiens |
| 2830 | 11741047_a_at | turquoise | vav guanine nucleotide exchange factor 1(VAV1)                      | Homo sapiens |
| 2831 | 11741063_a_at | turquoise | uncharacterized LOC101928143(LOC101928143)                          | Homo sapiens |
| 2832 | 11741067_x_at | turquoise | sulfatase modifying factor 2(SUMF2)                                 | Homo sapiens |
| 2833 | 11741076_a_at | turquoise | caspase 1(CASP1)                                                    | Homo sapiens |
| 2834 | 11741121_a_at | turquoise | zinc finger protein 700(ZNF700)                                     | Homo sapiens |
| 2835 | 11741126_s_at | turquoise | schlafen family member 11(SLFN11)                                   | Homo sapiens |
| 2836 | 11741129_s_at | turquoise | calpain 2(CAPN2)                                                    | Homo sapiens |
| 2837 | 11741133_s_at | turquoise | heterogeneous nuclear ribonucleoprotein F(HNRNPF)                   | Homo sapiens |
| 2838 | 11741138_a_at | turquoise | gasdermin D(GSDMD)                                                  | Homo sapiens |
| 2840 | 11741153_a_at | turquoise | neutrophil cytosolic factor 2(NCF2)                                 | Homo sapiens |
| 2841 | 11741158_at   | turquoise | renalase, FAD dependent amine oxidase(RNLS)                         | Homo sapiens |
| 2842 | 11741184_a_at | turquoise | uncharacterized LOC100130460(CAND1.11)                              | Homo sapiens |
| 2843 | 11741187_a_at | turquoise | apolipoprotein L1(APOL1)                                            | Homo sapiens |
| 2844 | 11741190_a_at | turquoise | purinergic receptor P2Y10(P2RY10)                                   | Homo sapiens |
| 2846 | 11741195_x_at | turquoise | sialic acid binding Ig like lectin 14(SIGLEC14)                     | Homo sapiens |
| 2847 | 11741202_x_at | turquoise | XIAP associated factor 1(XAF1)                                      | Homo sapiens |
| 2848 | 11741226_a_at | turquoise | EYA transcriptional coactivator and phosphatase 1(EYA1)             | Homo sapiens |
| 2849 | 11741229_a_at | turquoise | family with sequence similarity 111 member A(FAM111A)               | Homo sapiens |
| 2850 | 11741250_a_at | turquoise | SH2 domain containing 3C(SH2D3C)                                    | Homo sapiens |
| 2851 | 11741255_at   | turquoise | apolipoprotein B mRNA editing enzyme catalytic subunit 3F(APOBEC3F) | Homo sapiens |
| 2852 | 11741257_x_at | turquoise | apolipoprotein B mRNA editing enzyme catalytic subunit 3F(APOBEC3F) | Homo sapiens |
| 2853 | 11741290_a_at | turquoise | tumor necrosis factor superfamily member 14(TNFSF14)                | Homo sapiens |
| 2854 | 11741309_x_at | turquoise | serine/threonine protein kinase 26(STK26)                           | Homo sapiens |
| 2855 | 11741319_a_at | turquoise | small nucleolar RNA, H/ACA box 29(SNORA29)                          | Homo sapiens |
| 2856 | 11741326_x_at | turquoise | endosulfine alpha(ENSA)                                             | Homo sapiens |
| 2860 | 11741435_s_at | turquoise | growth factor receptor bound protein 2(GRB2)                        | Homo sapiens |
| 2862 | 11741477_a_at | turquoise | nephrocystin 1(NPHP1)                                               | Homo sapiens |
| 2863 | 11741493_a_at | turquoise | peroxisomal biogenesis factor 5(PEX5)                               | Homo sapiens |
| 2864 | 11741519_s_at | turquoise | CD14 molecule(CD14)                                                 | Homo sapiens |
| 2865 | 11741520_x_at | turquoise | CD14 molecule(CD14)                                                 | Homo sapiens |
| 2866 | 11741535_a_at | turquoise | transmembrane protein 2(TMEM2)                                      | Homo sapiens |
| 2867 | 11741536_x_at | turquoise | transmembrane protein 2(TMEM2)                                      | Homo sapiens |
| 2868 | 11741554_x_at | turquoise | caspase 8(CASP8)                                                    | Homo sapiens |
| 2869 | 11741555_s_at | turquoise | lipase A, lysosomal acid type(LIPA)                                 | Homo sapiens |
| 2870 | 11741567_x_at | turquoise | solute carrier organic anion transporter family member 2B1(SLCO2B1) | Homo sapiens |
| 2871 | 11741581_s_at | turquoise | synaptosome associated protein 23(SNAP23)                           | Homo sapiens |
| 2872 | 11741584_a_at | turquoise | ankyrin repeat and SOCS box containing 10(ASB10)                    | Homo sapiens |
| 2873 | 11741594_a_at | turquoise | leukocyte specific transcript 1(LST1)                               | Homo sapiens |
| 2874 | 11741605_a_at | turquoise | chromodomain helicase DNA binding protein 3(CHD3)                   | Homo sapiens |
| 2875 | 11741606_s_at | turquoise | chromodomain helicase DNA binding protein 3(CHD3)                   | Homo sapiens |
| 2876 | 11741619_a_at | turquoise | sodium voltage-gated channel alpha subunit 7(SCN7A)                 | Homo sapiens |
| 2877 | 11741632_a_at | turquoise | transporter 2, ATP binding cassette subfamily B member(TAP2)        | Homo sapiens |
| 2879 | 11741660_a_at | turquoise | T-cell activation RhoGTPase activating protein(TAGAP)               | Homo sapiens |
| 2880 | 11741667_x_at | turquoise | lymphocyte transmembrane adaptor 1(LAX1)                            | Homo sapiens |
| 2882 | 11741689_s_at | turquoise | sulfatase modifying factor 2(SUMF2)                                 | Homo sapiens |
| 2883 | 11741719_a_at | turquoise | adenosine deaminase, RNA specific(ADAR)                             | Homo sapiens |
| 2884 | 11741720_s_at | turquoise | adenosine deaminase, RNA specific(ADAR)                             | Homo sapiens |
| 2885 | 11741723_x_at | turquoise | DENN domain containing 2C(DENND2C)                                  | Homo sapiens |
| 2887 | 11741769_s_at | turquoise | sorting nexin family member 21(SNX21)                               | Homo sapiens |
| 2888 | 11741785_at   | turquoise | SH3 domain binding kinase family member 2(SBK2)                     | Homo sapiens |
| 2890 | 11741793_a_at | turquoise | fucose mutarotase(FUOM)                                             | Homo sapiens |
| 2891 | 11741796_a_at | turquoise | SH3 domain binding protein 2(SH3BP2)                                | Homo sapiens |
| 2892 | 11741797_a_at | turquoise | collagen type IV alpha 6 chain(COL4A6)                              | Homo sapiens |
| 2893 | 11741856_s_at | turquoise | zinc finger protein 658(ZNF658)                                     | Homo sapiens |
| 2894 | 11741860_a_at | turquoise | caveolin 3(CAV3)                                                    | Homo sapiens |
| 2895 | 11741870_a_at | turquoise | parkin RBR E3 ubiquitin protein ligase(PARK2)                       | Homo sapiens |
| 2896 | 11741878_a_at | turquoise | promyelocytic leukemia(PML)                                         | Homo sapiens |
| 2897 | 11741879_x_at | turquoise | promyelocytic leukemia(PML)                                         | Homo sapiens |
| 2898 | 11741885_x_at | turquoise | caspase 1(CASP1)                                                    | Homo sapiens |
| 2899 | 11741911_a_at | turquoise | guanylate binding protein 3(GBP3)                                   | Homo sapiens |
| 2900 | 11741980_a_at | turquoise | dual specificity phosphatase 6(DUSP6)                               | Homo sapiens |

|      |               |           |                                                               |              |
|------|---------------|-----------|---------------------------------------------------------------|--------------|
| 2901 | 11741981_x_at | turquoise | C-type lectin domain family 7 member A(CLEC7A)                | Homo sapiens |
| 2902 | 11741990_s_at | turquoise | C-C motif chemokine receptor like 2(CCRL2)                    | Homo sapiens |
| 2903 | 11742022_s_at | turquoise | IKAROS family zinc finger 1(IKZF1)                            | Homo sapiens |
| 2904 | 11742027_a_at | turquoise | angiopoietin 2(ANGPT2)                                        | Homo sapiens |
| 2905 | 11742028_a_at | turquoise | angiopoietin 2(ANGPT2)                                        | Homo sapiens |
| 2907 | 11742042_a_at | turquoise | interleukin 1 receptor associated kinase 4(IRAK4)             | Homo sapiens |
| 2908 | 11742043_a_at | turquoise | CD44 molecule (Indian blood group)(CD44)                      | Homo sapiens |
| 2909 | 11742063_a_at | turquoise | butyrophilin subfamily 3 member A1(BTN3A1)                    | Homo sapiens |
| 2910 | 11742071_x_at | turquoise | RAB27A, member RAS oncogene family(RAB27A)                    | Homo sapiens |
| 2911 | 11742078_a_at | turquoise | family with sequence similarity 222 member A(FAM222A)         | Homo sapiens |
| 2912 | 11742107_a_at | turquoise | palmitoyl-protein thioesterase 1(PPT1)                        | Homo sapiens |
| 2913 | 11742116_x_at | turquoise | lactate dehydrogenase A(LDHA)                                 | Homo sapiens |
| 2914 | 11742119_a_at | turquoise | nuclear transcription factor Y subunit gamma(NFYC)            | Homo sapiens |
| 2915 | 11742173_x_at | turquoise | leukocyte specific transcript 1(LST1)                         | Homo sapiens |
| 2916 | 11742182_x_at | turquoise | POTE ankyrin domain family member E(POTEE)                    | Homo sapiens |
| 2917 | 11742191_a_at | turquoise | uncharacterized LOC100506403(LOC100506403)                    | Homo sapiens |
| 2918 | 11742216_a_at | turquoise | killer cell lectin like receptor D1(KLRD1)                    | Homo sapiens |
| 2919 | 11742217_a_at | turquoise | protein tyrosine phosphatase, receptor type A(PTPRA)          | Homo sapiens |
| 2920 | 11742241_a_at | turquoise | IKAROS family zinc finger 3(IKZF3)                            | Homo sapiens |
| 2922 | 11742282_a_at | turquoise | CD40 molecule(CD40)                                           | Homo sapiens |
| 2923 | 11742303_a_at | turquoise | aspartate beta-hydroxylase(ASPH)                              | Homo sapiens |
| 2924 | 11742331_x_at | turquoise | ectodysplasin A(EDA)                                          | Homo sapiens |
| 2925 | 11742378_a_at | turquoise | aldo-keto reductase family 1 member B15(AKR1B15)              | Homo sapiens |
| 2926 | 11742386_a_at | turquoise | caspase 1(CASP1)                                              | Homo sapiens |
| 2927 | 11742439_s_at | turquoise | adenosine deaminase like(ADAL)                                | Homo sapiens |
| 2928 | 11742449_a_at | turquoise | apolipoprotein L1(APOL1)                                      | Homo sapiens |
| 2929 | 11742456_a_at | turquoise | microRNA 4745(MIR4745)                                        | Homo sapiens |
| 2930 | 11742457_s_at | turquoise | microRNA 4745(MIR4745)                                        | Homo sapiens |
| 2931 | 11742482_a_at | turquoise | actin related protein 2/3 complex subunit 4(ARPC4)            | Homo sapiens |
| 2932 | 11742537_a_at | turquoise | BCL2 associated X, apoptosis regulator(BAX)                   | Homo sapiens |
| 2933 | 11742678_s_at | turquoise | microRNA 4745(MIR4745)                                        | Homo sapiens |
| 2934 | 11742680_at   | turquoise | heterogeneous nuclear ribonucleoprotein A2/B1(HNRNPA2B1)      | Homo sapiens |
| 2935 | 11742681_s_at | turquoise | endoplasmic reticulum protein 29(ERP29)                       | Homo sapiens |
| 2936 | 11742686_a_at | turquoise | Fc fragment of IgG receptor and transporter(FCGRT)            | Homo sapiens |
| 2937 | 11742706_s_at | turquoise | RAB8A, member RAS oncogene family(RAB8A)                      | Homo sapiens |
| 2938 | 11742710_a_at | turquoise | serglycin(SRGN)                                               | Homo sapiens |
| 2939 | 11742717_a_at | turquoise | transforming growth factor beta regulator 1(TBRG1)            | Homo sapiens |
| 2940 | 11742723_a_at | turquoise | signal transducer and activator of transcription 6(STAT6)     | Homo sapiens |
| 2941 | 11742724_x_at | turquoise | signal transducer and activator of transcription 6(STAT6)     | Homo sapiens |
| 2942 | 11742735_a_at | turquoise | nucleolar and spindle associated protein 1(NUSAP1)            | Homo sapiens |
| 2944 | 11742740_at   | turquoise | gem nuclear organelle associated protein 5(GEMIN5)            | Homo sapiens |
| 2945 | 11742752_a_at | turquoise | ETS proto-oncogene 2, transcription factor(ETS2)              | Homo sapiens |
| 2946 | 11742765_at   | turquoise | regulator of G-protein signaling 1(RGS1)                      | Homo sapiens |
| 2947 | 11742784_at   | turquoise | senataxin(SETX)                                               | Homo sapiens |
| 2948 | 11742785_a_at | turquoise | senataxin(SETX)                                               | Homo sapiens |
| 2950 | 11742800_s_at | turquoise | E2F transcription factor 3(E2F3)                              | Homo sapiens |
| 2951 | 11742832_a_at | turquoise | abnormal spindle microtubule assembly(ASPM)                   | Homo sapiens |
| 2952 | 11742833_a_at | turquoise | family with sequence similarity 149 member A(FAM149A)         | Homo sapiens |
| 2953 | 11742838_at   | turquoise | arrestin beta 1(ARRB1)                                        | Homo sapiens |
| 2954 | 11742849_a_at | turquoise | ral guanine nucleotide dissociation stimulator like 3(RGL3)   | Homo sapiens |
| 2955 | 11742850_x_at | turquoise | major histocompatibility complex, class II, DR alpha(HLA-DRA) | Homo sapiens |
| 2956 | 11742859_a_at | turquoise | pleckstrin(PLEK)                                              | Homo sapiens |
| 2957 | 11742863_a_at | turquoise | CD200 molecule(CD200)                                         | Homo sapiens |
| 2958 | 11742870_at   | turquoise | actin related protein 2/3 complex subunit 2(ARPC2)            | Homo sapiens |
| 2959 | 11742881_s_at | turquoise | ubiquitin conjugating enzyme E2 B(UBE2B)                      | Homo sapiens |
| 2960 | 11742889_at   | turquoise | F-box protein 6(FBXO6)                                        | Homo sapiens |
| 2961 | 11742892_s_at | turquoise | proteasome subunit alpha 4(PSMA4)                             | Homo sapiens |
| 2962 | 11742904_s_at | turquoise | BCL2 associated athanogene 2(BAG2)                            | Homo sapiens |
| 2963 | 11742905_a_at | turquoise | DnaJ heat shock protein family (Hsp40) member C1(DNAJC1)      | Homo sapiens |
| 2964 | 11742906_a_at | turquoise | DnaJ heat shock protein family (Hsp40) member C1(DNAJC1)      | Homo sapiens |
| 2965 | 11742911_at   | turquoise | immunoglobulin superfamily member 6(IGSF6)                    | Homo sapiens |
| 2966 | 11742922_at   | turquoise | lysosomal protein transmembrane 5(LAPTM5)                     | Homo sapiens |
| 2967 | 11742923_a_at | turquoise | lysosomal protein transmembrane 5(LAPTM5)                     | Homo sapiens |
| 2968 | 11742926_at   | turquoise | carnitine palmitoyltransferase 2(CPT2)                        | Homo sapiens |
| 2970 | 11742944_a_at | turquoise | coronin 1A(CORO1A)                                            | Homo sapiens |
| 2971 | 11742948_at   | turquoise | myristoylated alanine rich protein kinase C substrate(MARCKS) | Homo sapiens |
| 2972 | 11742950_s_at | turquoise | CCR4-NOT transcription complex subunit 8(CNOT8)               | Homo sapiens |
| 2973 | 11742964_a_at | turquoise | inositol 1,4,5-trisphosphate receptor type 3(ITPR3)           | Homo sapiens |
| 2976 | 11742985_at   | turquoise | lymphocyte antigen 9(LY9)                                     | Homo sapiens |
| 2977 | 11742999_x_at | turquoise | peroxiredoxin 6(PRDx6)                                        | Homo sapiens |
| 2978 | 11743000_at   | turquoise | CD83 molecule(CD83)                                           | Homo sapiens |
| 2980 | 11743003_a_at | turquoise | cytochrome P450 family 4 subfamily B member 1(CYP4B1)         | Homo sapiens |
| 2981 | 11743007_at   | turquoise | NFKB inhibitor epsilon(NFKBIE)                                | Homo sapiens |
| 2982 | 11743008_a_at | turquoise | uncharacterized LOC100505585(LOC100505585)                    | Homo sapiens |
| 2983 | 11743009_x_at | turquoise | uncharacterized LOC100505585(LOC100505585)                    | Homo sapiens |
| 2984 | 11743014_a_at | turquoise | disco interacting protein 2 homolog C(DIP2C)                  | Homo sapiens |
| 2986 | 11743016_at   | turquoise | disco interacting protein 2 homolog C(DIP2C)                  | Homo sapiens |
| 2987 | 11743036_s_at | turquoise | spermidine/spermine N1-acetyltransferase 1(SAT1)              | Homo sapiens |
| 2989 | 11743055_at   | turquoise | phospholipase A2 activating protein(PLAA)                     | Homo sapiens |
| 2990 | 11743062_a_at | turquoise | plasminogen activator, urokinase receptor(PLAUR)              | Homo sapiens |
| 2991 | 11743063_x_at | turquoise | plasminogen activator, urokinase receptor(PLAUR)              | Homo sapiens |
| 2992 | 11743065_at   | turquoise | cell division cycle 6(CDC6)                                   | Homo sapiens |



|      |               |           |                                                                             |              |
|------|---------------|-----------|-----------------------------------------------------------------------------|--------------|
| 2993 | 11743071_a_at | turquoise | lysophosphatidic acid receptor 6(LPAR6)                                     | Homo sapiens |
| 2995 | 11743105_at   | turquoise | pentatricopeptide repeat domain 3(PTCD3)                                    | Homo sapiens |
| 2996 | 11743120_s_at | turquoise | SENP3-EIF4A1 readthrough (NMD candidate)(SENP3-EIF4A1)                      | Homo sapiens |
| 2997 | 11743127_x_at | turquoise | coiled-coil-helix-coiled-coil-helix domain containing 10(CHCHD10)           | Homo sapiens |
| 2998 | 11743129_at   | turquoise | sortilin related receptor 1(SORL1)                                          | Homo sapiens |
| 2999 | 11743130_a_at | turquoise | sortilin related receptor 1(SORL1)                                          | Homo sapiens |
| 3000 | 11743157_a_at | turquoise | electron transfer flavoprotein dehydrogenase(ETFDH)                         | Homo sapiens |
| 3001 | 11743166_at   | turquoise | ETS variant 6(ETV6)                                                         | Homo sapiens |
| 3002 | 11743167_at   | turquoise | ETS variant 6(ETV6)                                                         | Homo sapiens |
| 3003 | 11743168_at   | turquoise | indoleamine 2,3-dioxygenase 1(IDO1)                                         | Homo sapiens |
| 3004 | 11743169_a_at | turquoise | leupaxin(LPXN)                                                              | Homo sapiens |
| 3005 | 11743180_at   | turquoise | nuclear protein, coactivator of histone transcription(NPAT)                 | Homo sapiens |
| 3006 | 11743194_x_at | turquoise | TNF receptor superfamily member 14(TNFRSF14)                                | Homo sapiens |
| 3007 | 11743196_a_at | turquoise | toll like receptor 4(TLR4)                                                  | Homo sapiens |
| 3008 | 11743197_at   | turquoise | toll like receptor 4(TLR4)                                                  | Homo sapiens |
| 3010 | 11743290_at   | turquoise | polypeptide N-acetylgalactosaminyltransferase 1(GALNT1)                     | Homo sapiens |
| 3011 | 11743299_at   | turquoise | signal recognition particle 72(SRP72)                                       | Homo sapiens |
| 3012 | 11743301_a_at | turquoise | signal recognition particle 72(SRP72)                                       | Homo sapiens |
| 3013 | 11743321_at   | turquoise | cathepsin O(CTSO)                                                           | Homo sapiens |
| 3015 | 11743332_a_at | turquoise | mitochondrial ribosomal protein L35(MRPL35)                                 | Homo sapiens |
| 3016 | 11743333_a_at | turquoise | mitochondrial ribosomal protein L35(MRPL35)                                 | Homo sapiens |
| 3017 | 11743334_a_at | turquoise | mitochondrial ribosomal protein L35(MRPL35)                                 | Homo sapiens |
| 3018 | 11743348_a_at | turquoise | CD47 molecule(CD47)                                                         | Homo sapiens |
| 3019 | 11743350_a_at | turquoise | chromosome 15 open reading frame 48(C15orf48)                               | Homo sapiens |
| 3020 | 11743352_s_at | turquoise | cordons-bleu WH2 repeat protein like 1(COBL1)                               | Homo sapiens |
| 3021 | 11743353_s_at | turquoise | signal transducer and activator of transcription 1(STAT1)                   | Homo sapiens |
| 3022 | 11743361_at   | turquoise | adenylosuccinate synthase(ADSS)                                             | Homo sapiens |
| 3023 | 11743362_s_at | turquoise | adenylosuccinate synthase(ADSS)                                             | Homo sapiens |
| 3024 | 11743377_a_at | turquoise | ninein(NIN)                                                                 | Homo sapiens |
| 3025 | 11743379_a_at | turquoise | abl interactor 1(ABI1)                                                      | Homo sapiens |
| 3026 | 11743386_s_at | turquoise | pre-mRNA processing factor 40 homolog A(PRP40A)                             | Homo sapiens |
| 3027 | 11743394_a_at | turquoise | androgen induced 1(AIG1)                                                    | Homo sapiens |
| 3028 | 11743406_x_at | turquoise | small integral membrane protein 14(SMIM14)                                  | Homo sapiens |
| 3029 | 11743428_a_at | turquoise | runt related transcription factor 3(RUNX3)                                  | Homo sapiens |
| 3030 | 11743433_a_at | turquoise | 6-phosphogluconolactonase(PGLS)                                             | Homo sapiens |
| 3031 | 11743452_s_at | turquoise | cell division cycle associated 4(CDCA4)                                     | Homo sapiens |
| 3032 | 11743458_a_at | turquoise | family with sequence similarity 49 member A(FAM49A)                         | Homo sapiens |
| 3034 | 11743475_a_at | turquoise | integrin subunit alpha X(ITGAX)                                             | Homo sapiens |
| 3035 | 11743501_a_at | turquoise | TNF receptor associated factor 3(TRAF3)                                     | Homo sapiens |
| 3038 | 11743530_a_at | turquoise | centromere protein K(CENPK)                                                 | Homo sapiens |
| 3039 | 11743533_x_at | turquoise | RUN and FYVE domain containing 3(RUFY3)                                     | Homo sapiens |
| 3040 | 11743555_a_at | turquoise | queuine tRNA-ribosyltransferase accessory subunit 2(QTRT2)                  | Homo sapiens |
| 3041 | 11743559_a_at | turquoise | protein tyrosine phosphatase, receptor type C(PTPRC)                        | Homo sapiens |
| 3042 | 11743560_a_at | turquoise | protein tyrosine phosphatase, receptor type C(PTPRC)                        | Homo sapiens |
| 3043 | 11743561_a_at | turquoise | protein tyrosine phosphatase, receptor type C(PTPRC)                        | Homo sapiens |
| 3044 | 11743570_s_at | turquoise | echinoderm microtubule associated protein like 1(EML1)                      | Homo sapiens |
| 3045 | 11743581_s_at | turquoise | ARP2 actin related protein 2 homolog(ACTR2)                                 | Homo sapiens |
| 3046 | 11743586_a_at | turquoise | poly(A) RNA polymerase D4, non-canonical(PAPD4)                             | Homo sapiens |
| 3047 | 11743596_a_at | turquoise | protein tyrosine phosphatase, receptor type E(PTPRE)                        | Homo sapiens |
| 3048 | 11743613_a_at | turquoise | tropomodulin 3(TM0D3)                                                       | Homo sapiens |
| 3049 | 11743614_a_at | turquoise | ubiquitin specific peptidase 47(USP47)                                      | Homo sapiens |
| 3050 | 11743619_a_at | turquoise | dihydrouridine synthase 4 like(DUS4L)                                       | Homo sapiens |
| 3051 | 11743624_a_at | turquoise | translocase of inner mitochondrial membrane 22(TIMM22)                      | Homo sapiens |
| 3052 | 11743635_at   | turquoise | zinc and ring finger 2(ZNRF2)                                               | Homo sapiens |
| 3053 | 11743643_a_at | turquoise | dihydroorotate dehydrogenase (quinone)(DHODH)                               | Homo sapiens |
| 3054 | 11743647_at   | turquoise | high mobility group nucleosomal binding domain 4(HMGN4)                     | Homo sapiens |
| 3056 | 11743658_at   | turquoise | H2A histone family member Y2(H2AFY2)                                        | Homo sapiens |
| 3057 | 11743677_at   | turquoise | purinergic receptor P2Y8(P2RY8)                                             | Homo sapiens |
| 3058 | 11743691_a_at | turquoise | mitochondrial ribosomal protein L30(MRPL30)                                 | Homo sapiens |
| 3059 | 11743704_x_at | turquoise | abhydrolase domain containing 11(ABHD11)                                    | Homo sapiens |
| 3060 | 11743709_at   | turquoise | N(alpha)-acetyltransferase 15, NatA auxiliary subunit(NAA15)                | Homo sapiens |
| 3061 | 11743722_x_at | turquoise | MARCKS like 1(MARCKSL1)                                                     | Homo sapiens |
| 3062 | 11743725_s_at | turquoise | major facilitator superfamily domain containing 1(MFSD1)                    | Homo sapiens |
| 3063 | 11743726_s_at | turquoise | ras homolog family member A(RHOA)                                           | Homo sapiens |
| 3065 | 11743730_at   | turquoise | tumor necrosis factor superfamily member 10(TNFSF10)                        | Homo sapiens |
| 3066 | 11743731_a_at | turquoise | tumor necrosis factor superfamily member 10(TNFSF10)                        | Homo sapiens |
| 3067 | 11743736_at   | turquoise | motile sperm domain containing 2(MOSPD2)                                    | Homo sapiens |
| 3068 | 11743748_a_at | turquoise | linker for activation of T-cells(LAT)                                       | Homo sapiens |
| 3069 | 11743759_a_at | turquoise | CDC42 small effector 2(CDC42SE2)                                            | Homo sapiens |
| 3070 | 11743760_s_at | turquoise | CDC42 small effector 2(CDC42SE2)                                            | Homo sapiens |
| 3071 | 11743771_at   | turquoise | GTPase, IMAP family member 7(GIMAP7)                                        | Homo sapiens |
| 3072 | 11743781_a_at | turquoise | 5'-3' exoribonuclease 1(XRN1)                                               | Homo sapiens |
| 3073 | 11743808_a_at | turquoise | 7-dehydrocholesterol reductase(DHCR7)                                       | Homo sapiens |
| 3074 | 11743813_a_at | turquoise | ecotropic viral integration site 2B(EVI2B)                                  | Homo sapiens |
| 3075 | 11743824_s_at | turquoise | topoisomerase (DNA) II binding protein 1(TOPBP1)                            | Homo sapiens |
| 3076 | 11743841_at   | turquoise | phosphatidylinositol specific phospholipase C X domain containing 2(PLCXD2) | Homo sapiens |
| 3077 | 11743843_a_at | turquoise | DnaJ heat shock protein family (Hsp40) member C28(DNAJC28)                  | Homo sapiens |
| 3078 | 11743856_a_at | turquoise | collagen triple helix repeat containing 1(CTHRC1)                           | Homo sapiens |
| 3079 | 11743863_a_at | turquoise | ATPase plasma membrane Ca2+ transporting 1(ATP2B1)                          | Homo sapiens |
| 3080 | 11743864_a_at | turquoise | ATPase plasma membrane Ca2+ transporting 1(ATP2B1)                          | Homo sapiens |
| 3081 | 11743865_s_at | turquoise | ATPase plasma membrane Ca2+ transporting 1(ATP2B1)                          | Homo sapiens |
| 3082 | 11743881_s_at | turquoise | melanoregulin(MREG)                                                         | Homo sapiens |

|      |               |           |                                                                                                               |              |
|------|---------------|-----------|---------------------------------------------------------------------------------------------------------------|--------------|
| 3084 | 11743888_at   | turquoise | zinc finger protein 10(ZNF10)                                                                                 | Homo sapiens |
| 3085 | 11743890_at   | turquoise | zinc finger protein 10(ZNF10)                                                                                 | Homo sapiens |
| 3086 | 11743900_at   | turquoise | class II major histocompatibility complex transactivator(CIITA)                                               | Homo sapiens |
| 3087 | 11743911_a_at | turquoise | phospholipid scramblase 1(PLSCR1)                                                                             | Homo sapiens |
| 3088 | 11743915_s_at | turquoise | SEL1L family member 3(SEL1L3)                                                                                 | Homo sapiens |
| 3089 | 11743916_a_at | turquoise | NPC intracellular cholesterol transporter 1(NPC1)                                                             | Homo sapiens |
| 3090 | 11743931_x_at | turquoise | endoplasmic reticulum protein 29(ERP29)                                                                       | Homo sapiens |
| 3091 | 11743960_a_at | turquoise | microRNA 6787(MIR6787)                                                                                        | Homo sapiens |
| 3092 | 11743968_a_at | turquoise | cytochrome b-245 alpha chain(CYBA)                                                                            | Homo sapiens |
| 3094 | 11743984_a_at | turquoise | A-kinase anchoring protein 1(AKAP1)                                                                           | Homo sapiens |
| 3095 | 11743985_s_at | turquoise | A-kinase anchoring protein 1(AKAP1)                                                                           | Homo sapiens |
| 3096 | 11743986_at   | turquoise | A-kinase anchoring protein 1(AKAP1)                                                                           | Homo sapiens |
| 3097 | 11744000_a_at | turquoise | NFKB inhibitor alpha(NFKBIA)                                                                                  | Homo sapiens |
| 3098 | 11744002_s_at | turquoise | methylenetetrahydrofolate dehydrogenase (NADP+ dependent) 2, methylenetetrahydrofolate cyclohydrolase(MTHFD2) | Homo sapiens |
| 3099 | 11744006_a_at | turquoise | vinculin(VCL)                                                                                                 | Homo sapiens |
| 3100 | 11744017_at   | turquoise | fermitin family member 3(FERMT3)                                                                              | Homo sapiens |
| 3101 | 11744020_at   | turquoise | nucleoporin 210(NUP210)                                                                                       | Homo sapiens |
| 3102 | 11744027_s_at | turquoise | transmembrane protein 181(TMEM181)                                                                            | Homo sapiens |
| 3103 | 11744033_s_at | turquoise | S100 calcium binding protein A11(S100A11)                                                                     | Homo sapiens |
| 3104 | 11744034_a_at | turquoise | vasodilator-stimulated phosphoprotein(VASP)                                                                   | Homo sapiens |
| 3105 | 11744037_s_at | turquoise | c-Maf inducing protein(CMIP)                                                                                  | Homo sapiens |
| 3107 | 11744054_a_at | turquoise | zinc finger NFX1-type containing 1(ZNFX1)                                                                     | Homo sapiens |
| 3110 | 11744077_at   | turquoise | actin related protein 2/3 complex subunit 1B(ARPC1B)                                                          | Homo sapiens |
| 3111 | 11744082_at   | turquoise | mitochondrial ribosomal protein S31(MRPS31)                                                                   | Homo sapiens |
| 3112 | 11744118_a_at | turquoise | mitochondrial ribosomal protein L10(MRPL10)                                                                   | Homo sapiens |
| 3113 | 11744119_a_at | turquoise | microRNA 6734(MIR6734)                                                                                        | Homo sapiens |
| 3114 | 11744129_at   | turquoise | myosin IXB(MYO9B)                                                                                             | Homo sapiens |
| 3115 | 11744134_at   | turquoise | zinc finger SWIM-type containing 6(ZSWIM6)                                                                    | Homo sapiens |
| 3116 | 11744137_a_at | turquoise | calcium/calmodulin dependent protein kinase ID(CAMK1D)                                                        | Homo sapiens |
| 3117 | 11744138_at   | turquoise | calcium/calmodulin dependent protein kinase ID(CAMK1D)                                                        | Homo sapiens |
| 3119 | 11744149_at   | turquoise | lipin 2(LPIN2)                                                                                                | Homo sapiens |
| 3120 | 11744150_s_at | turquoise | lipin 2(LPIN2)                                                                                                | Homo sapiens |
| 3121 | 11744151_x_at | turquoise | lipin 2(LPIN2)                                                                                                | Homo sapiens |
| 3122 | 11744153_a_at | turquoise | reticulon 1(RTN1)                                                                                             | Homo sapiens |
| 3123 | 11744156_a_at | turquoise | ribosomal protein S6 kinase A1(RPS6KA1)                                                                       | Homo sapiens |
| 3124 | 11744162_a_at | turquoise | dual specificity phosphatase 4(DUSP4)                                                                         | Homo sapiens |
| 3127 | 11744176_at   | turquoise | protein phosphatase 1 regulatory subunit 9B(PPP1R9B)                                                          | Homo sapiens |
| 3128 | 11744178_a_at | turquoise | chromosome 19 open reading frame 66(C19orf66)                                                                 | Homo sapiens |
| 3129 | 11744180_a_at | turquoise | T-cell immune regulator 1, ATPase H+ transporting V0 subunit a3(TCIRG1)                                       | Homo sapiens |
| 3132 | 11744197_s_at | turquoise | myosin light chain 12B(MYL12B)                                                                                | Homo sapiens |
| 3135 | 11744209_s_at | turquoise | serpin family H member 1(SERPINH1)                                                                            | Homo sapiens |
| 3136 | 11744214_s_at | turquoise | TRAF-type zinc finger domain containing 1(TRAFF1)                                                             | Homo sapiens |
| 3137 | 11744215_at   | turquoise | ring finger protein 149(RNF149)                                                                               | Homo sapiens |
| 3141 | 11744236_a_at | turquoise | DEXD/H-box helicase 60(DDX60)                                                                                 | Homo sapiens |
| 3142 | 11744258_a_at | turquoise | ATPase Na+/K+ transporting subunit beta 3(ATP1B3)                                                             | Homo sapiens |
| 3143 | 11744259_a_at | turquoise | ATPase Na+/K+ transporting subunit beta 3(ATP1B3)                                                             | Homo sapiens |
| 3145 | 11744263_s_at | turquoise | ras-related C3 botulinum toxin substrate 2 (rho family, small GTP binding protein Rac2)(RAC2)                 | Homo sapiens |
| 3146 | 11744273_a_at | turquoise | stem-loop binding protein(SLBP)                                                                               | Homo sapiens |
| 3147 | 11744274_at   | turquoise | NDC80, kinetochore complex component(NDC80)                                                                   | Homo sapiens |
| 3149 | 11744276_a_at | turquoise | capping actin protein, gelsolin like(CAPG)                                                                    | Homo sapiens |
| 3151 | 11744300_at   | turquoise | carbohydrate sulfotransferase 15(CHST15)                                                                      | Homo sapiens |
| 3152 | 11744323_s_at | turquoise | PWWP domain containing 2A(PWWP2A)                                                                             | Homo sapiens |
| 3153 | 11744331_a_at | turquoise | complement factor B(CFB)                                                                                      | Homo sapiens |
| 3154 | 11744345_x_at | turquoise | tubulin alpha 1b(TUBA1B)                                                                                      | Homo sapiens |
| 3155 | 11744351_a_at | turquoise | NLR family pyrin domain containing 1(NLRP1)                                                                   | Homo sapiens |
| 3156 | 11744353_at   | turquoise | TatD DNase domain containing 2(TATDN2)                                                                        | Homo sapiens |
| 3157 | 11744360_x_at | turquoise | reticulon 4(RTN4)                                                                                             | Homo sapiens |
| 3158 | 11744364_s_at | turquoise | inositol polyphosphate-5-phosphatase D(INPP5D)                                                                | Homo sapiens |
| 3159 | 11744374_x_at | turquoise | major histocompatibility complex, class II, DR beta 1(HLA-DRB1)                                               | Homo sapiens |
| 3163 | 11744425_a_at | turquoise | KIAA0101(KIAA0101)                                                                                            | Homo sapiens |
| 3164 | 11744426_x_at | turquoise | KIAA0101(KIAA0101)                                                                                            | Homo sapiens |
| 3166 | 11744434_a_at | turquoise | poly(ADP-ribose) polymerase family member 9(PARP9)                                                            | Homo sapiens |
| 3167 | 11744435_a_at | turquoise | dual specificity phosphatase 6(DUSP6)                                                                         | Homo sapiens |
| 3168 | 11744436_a_at | turquoise | microRNA 1178(MIR1178)                                                                                        | Homo sapiens |
| 3169 | 11744441_a_at | turquoise | brain abundant membrane attached signal protein 1(BASP1)                                                      | Homo sapiens |
| 3171 | 11744449_a_at | turquoise | Rho GTPase activating protein 4(ARHGAP4)                                                                      | Homo sapiens |
| 3172 | 11744450_x_at | turquoise | Rho GTPase activating protein 4(ARHGAP4)                                                                      | Homo sapiens |
| 3175 | 11744482_a_at | turquoise | transmembrane protein 246(TMEM246)                                                                            | Homo sapiens |
| 3176 | 11744484_s_at | turquoise | major histocompatibility complex, class II, DR alpha(HLA-DRA)                                                 | Homo sapiens |
| 3177 | 11744485_a_at | turquoise | WD repeat domain 81(WDR81)                                                                                    | Homo sapiens |
| 3178 | 11744486_x_at | turquoise | WD repeat domain 81(WDR81)                                                                                    | Homo sapiens |
| 3179 | 11744495_a_at | turquoise | intraflagellar transport 46(IFT46)                                                                            | Homo sapiens |
| 3180 | 11744503_x_at | turquoise | arginine and serine rich protein 1(RSRP1)                                                                     | Homo sapiens |
| 3181 | 11744512_a_at | turquoise | TraB domain containing 2A(TRABD2A)                                                                            | Homo sapiens |
| 3182 | 11744525_s_at | turquoise | mitochondrial transcription termination factor 2(MTERF2)                                                      | Homo sapiens |
| 3184 | 11744560_s_at | turquoise | microRNA 4723(MIR4723)                                                                                        | Homo sapiens |
| 3185 | 11744562_x_at | turquoise | eva-1 homolog B(EVA1B)                                                                                        | Homo sapiens |
| 3186 | 11744567_a_at | turquoise | CD72 molecule(CD72)                                                                                           | Homo sapiens |
| 3187 | 11744599_x_at | turquoise | nucleoporin 62(NUP62)                                                                                         | Homo sapiens |
| 3188 | 11744608_a_at | turquoise | poly(ADP-ribose) polymerase family member 3(PARP3)                                                            | Homo sapiens |
| 3189 | 11744609_a_at | turquoise | ataxin 7(ATXN7)                                                                                               | Homo sapiens |
| 3190 | 11744611_x_at | turquoise | paternally expressed 3(PEG3)                                                                                  | Homo sapiens |

|      |               |           |                                                                   |              |
|------|---------------|-----------|-------------------------------------------------------------------|--------------|
| 3191 | 11744612_a_at | turquoise | NudC domain containing 1(NUDCD1)                                  | Homo sapiens |
| 3192 | 11744613_a_at | turquoise | solute carrier family 6 member 13(SLC6A13)                        | Homo sapiens |
| 3193 | 11744618_a_at | turquoise | dual specificity phosphatase 6(DUSP6)                             | Homo sapiens |
| 3195 | 11744638_at   | turquoise | SND1 intronic transcript 1(SND1-IT1)                              | Homo sapiens |
| 3196 | 11744645_a_at | turquoise | transcobalamin 2(TCN2)                                            | Homo sapiens |
| 3197 | 11744652_a_at | turquoise | hyaluronan and proteoglycan link protein 2(HAPLN2)                | Homo sapiens |
| 3198 | 11744654_s_at | turquoise | CD44 molecule (Indian blood group)(CD44)                          | Homo sapiens |
| 3199 | 11744660_s_at | turquoise | C-C motif chemokine ligand 4 like 1(CCL4L1)                       | Homo sapiens |
| 3200 | 11744663_a_at | turquoise | target of myb1 like 1 membrane trafficking protein(TOM1L1)        | Homo sapiens |
| 3202 | 11744673_a_at | turquoise | SP100 nuclear antigen(SP100)                                      | Homo sapiens |
| 3203 | 11744675_a_at | turquoise | family with sequence similarity 208 member A(FAM208A)             | Homo sapiens |
| 3204 | 11744699_a_at | turquoise | tyrosyl-DNA phosphodiesterase 1(TDP1)                             | Homo sapiens |
| 3205 | 11744700_x_at | turquoise | tyrosyl-DNA phosphodiesterase 1(TDP1)                             | Homo sapiens |
| 3206 | 11744715_a_at | turquoise | solute carrier family 38 member 6(SLC38A6)                        | Homo sapiens |
| 3207 | 11744717_a_at | turquoise | chromosome 18 open reading frame 8(C18orf8)                       | Homo sapiens |
| 3208 | 11744718_a_at | turquoise | collagen triple helix repeat containing 1(CTHRC1)                 | Homo sapiens |
| 3209 | 11744728_a_at | turquoise | golgin A4(GOLGA4)                                                 | Homo sapiens |
| 3210 | 11744735_a_at | turquoise | transmembrane protein 200A(TMEM200A)                              | Homo sapiens |
| 3211 | 11744749_a_at | turquoise | DnaI heat shock protein family (Hsp40) member C11(DNAJC11)        | Homo sapiens |
| 3212 | 11744751_a_at | turquoise | serpin family B member 9(SERPINB9)                                | Homo sapiens |
| 3213 | 11744761_x_at | turquoise | uncharacterized LOC100505585(LOC100505585)                        | Homo sapiens |
| 3214 | 11744776_a_at | turquoise | nicotinamide N-methyltransferase(NNMT)                            | Homo sapiens |
| 3215 | 11744783_a_at | turquoise | SP100 nuclear antigen(SP100)                                      | Homo sapiens |
| 3216 | 11744786_x_at | turquoise | opioid growth factor receptor(OGFR)                               | Homo sapiens |
| 3217 | 11744789_a_at | turquoise | centromere protein U(CENPU)                                       | Homo sapiens |
| 3218 | 11744791_a_at | turquoise | fibronectin type III domain containing 5(FNDC5)                   | Homo sapiens |
| 3219 | 11744793_x_at | turquoise | DLG associated protein 5(DLGAP5)                                  | Homo sapiens |
| 3220 | 11744796_a_at | turquoise | DAB2, clathrin adaptor protein(DAB2)                              | Homo sapiens |
| 3221 | 11744797_s_at | turquoise | DAB2, clathrin adaptor protein(DAB2)                              | Homo sapiens |
| 3222 | 11744800_x_at | turquoise | fms related tyrosine kinase 3 ligand(FLT3LG)                      | Homo sapiens |
| 3223 | 11744809_a_at | turquoise | BORCS7-ASMT readthrough (NMD candidate)(BORCS7-ASMT)              | Homo sapiens |
| 3225 | 11744829_s_at | turquoise | major histocompatibility complex, class I, E(HLA-E)               | Homo sapiens |
| 3226 | 11744830_x_at | turquoise | nuclear pore complex interacting protein family member B5(NPIP85) | Homo sapiens |
| 3228 | 11744887_s_at | turquoise | zwilch kinetochore protein(ZWILCH)                                | Homo sapiens |
| 3229 | 11744888_a_at | turquoise | lamin B1(LMNB1)                                                   | Homo sapiens |
| 3230 | 11744889_a_at | turquoise | lamin B1(LMNB1)                                                   | Homo sapiens |
| 3231 | 11744896_a_at | turquoise | G-protein signaling modulator 3(GPSM3)                            | Homo sapiens |
| 3232 | 11744898_a_at | turquoise | proline rich coiled-coil 2C(PRRC2C)                               | Homo sapiens |
| 3234 | 11744920_a_at | turquoise | outer dense fiber of sperm tails 3B(ODF3B)                        | Homo sapiens |
| 3235 | 11744940_s_at | turquoise | abhydrolase domain containing 17A(ABHD17A)                        | Homo sapiens |
| 3236 | 11744948_x_at | turquoise | semaphorin 3F(SEMA3F)                                             | Homo sapiens |
| 3237 | 11744953_a_at | turquoise | annexin A1(ANXA1)                                                 | Homo sapiens |
| 3238 | 11744954_x_at | turquoise | annexin A1(ANXA1)                                                 | Homo sapiens |
| 3239 | 11744955_a_at | turquoise | annexin A1(ANXA1)                                                 | Homo sapiens |
| 3240 | 11744962_a_at | turquoise | ADP-ribosyltransferase 5(ART5)                                    | Homo sapiens |
| 3242 | 11744991_a_at | turquoise | acetyl-CoA carboxylase beta(ACACB)                                | Homo sapiens |
| 3243 | 11744993_s_at | turquoise | sirtuin 7(SIRT7)                                                  | Homo sapiens |
| 3244 | 11744995_s_at | turquoise | pantothenate kinase 1(PANK1)                                      | Homo sapiens |
| 3245 | 11745015_a_at | turquoise | SP100 nuclear antigen(SP100)                                      | Homo sapiens |
| 3246 | 11745021_a_at | turquoise | v-myc avian myelocytomatosis viral oncogene homolog(MYC)          | Homo sapiens |
| 3247 | 11745063_x_at | turquoise | leucine rich repeat containing 8 family member B(LRRC8B)          | Homo sapiens |
| 3248 | 11745084_a_at | turquoise | family with sequence similarity 168 member B(FAM168B)             | Homo sapiens |
| 3249 | 11745105_a_at | turquoise | meiotic double-stranded break formation protein 1(ME11)           | Homo sapiens |
| 3250 | 11745114_a_at | turquoise | adhesion G protein-coupled receptor E2(ADGRE2)                    | Homo sapiens |
| 3252 | 11745144_a_at | turquoise | C-type lectin domain family 4 member E(CLEC4E)                    | Homo sapiens |
| 3254 | 11745165_a_at | turquoise | TRAF3 interacting protein 3(TRAF3IP3)                             | Homo sapiens |
| 3255 | 11745171_x_at | turquoise | diaphanous related formin 1(DIAPH1)                               | Homo sapiens |
| 3257 | 11745189_a_at | turquoise | apolipoprotein L1(APOL1)                                          | Homo sapiens |
| 3258 | 11745190_a_at | turquoise | FUS RNA binding protein(FUS)                                      | Homo sapiens |
| 3259 | 11745192_a_at | turquoise | erythrocyte membrane protein band 4.1 like 3(EPB41L3)             | Homo sapiens |
| 3261 | 11745232_s_at | turquoise | N-6 adenine-specific DNA methyltransferase 1 (putative)(N6AMT1)   | Homo sapiens |
| 3262 | 11745234_a_at | turquoise | 3-hydroxyacyl-CoA dehydratase 4(HACD4)                            | Homo sapiens |
| 3263 | 11745243_x_at | turquoise | neuroblastoma breakpoint family member 11(NBPF11)                 | Homo sapiens |
| 3265 | 11745248_a_at | turquoise | ilvB acetolactate synthase like(ILVBL)                            | Homo sapiens |
| 3267 | 11745266_x_at | turquoise | transporter 2, ATP binding cassette subfamily B member(TAP2)      | Homo sapiens |
| 3268 | 11745268_a_at | turquoise | tensin 1(TNS1)                                                    | Homo sapiens |
| 3269 | 11745274_a_at | turquoise | par-3 family cell polarity regulator(PARD3)                       | Homo sapiens |
| 3270 | 11745276_a_at | turquoise | sterol O-acyltransferase 1(SOAT1)                                 | Homo sapiens |
| 3271 | 11745289_a_at | turquoise | LIM domain and actin binding 1(LIMA1)                             | Homo sapiens |
| 3272 | 11745302_a_at | turquoise | StAR related lipid transfer domain containing 3(STARD3)           | Homo sapiens |
| 3273 | 11745313_a_at | turquoise | synergin gamma(SYNRG)                                             | Homo sapiens |
| 3274 | 11745364_a_at | turquoise | signal transducer and activator of transcription 5A(STAT5A)       | Homo sapiens |
| 3275 | 11745376_a_at | turquoise | apolipoprotein L6(APOL6)                                          | Homo sapiens |
| 3277 | 11745403_a_at | turquoise | zinc finger protein 683(ZNF683)                                   | Homo sapiens |
| 3278 | 11745406_a_at | turquoise | MICAL like 2(MICAL2)                                              | Homo sapiens |
| 3279 | 11745409_a_at | turquoise | La ribonucleoprotein domain family member 1B(LARP1B)              | Homo sapiens |
| 3280 | 11745415_a_at | turquoise | diaphanous related formin 1(DIAPH1)                               | Homo sapiens |
| 3281 | 11745421_a_at | turquoise | BH3 interacting domain death agonist(BID)                         | Homo sapiens |
| 3282 | 11745440_s_at | turquoise | RELA proto-oncogene, NF-kB subunit(RELA)                          | Homo sapiens |
| 3285 | 11745468_a_at | turquoise | gamma-aminobutyric acid type B receptor subunit 2(GABBR2)         | Homo sapiens |
| 3286 | 11745471_a_at | turquoise | zinc finger protein 276(ZNF276)                                   | Homo sapiens |
| 3287 | 11745477_x_at | turquoise | wee1 family member 1(TTYH1)                                       | Homo sapiens |

|      |               |           |                                                                                                               |              |
|------|---------------|-----------|---------------------------------------------------------------------------------------------------------------|--------------|
| 3288 | 11745479_a_at | turquoise | glycerate kinase(GLYCKT)                                                                                      | Homo sapiens |
| 3289 | 11745496_a_at | turquoise | serine peptidase inhibitor, Kunitz type 2(SPINT2)                                                             | Homo sapiens |
| 3290 | 11745498_a_at | turquoise | interferon regulatory factor 3(IRF3)                                                                          | Homo sapiens |
| 3291 | 11745499_x_at | turquoise | interferon regulatory factor 3(IRF3)                                                                          | Homo sapiens |
| 3292 | 11745500_a_at | turquoise | C-type lectin domain family 10 member A(CLEC10A)                                                              | Homo sapiens |
| 3293 | 11745501_s_at | turquoise | endothelial cell surface expressed chemotaxis and apoptosis regulator(ECSCR)                                  | Homo sapiens |
| 3294 | 11745509_a_at | turquoise | IQ motif containing GTPase activating protein 2(IQGAP2)                                                       | Homo sapiens |
| 3296 | 11745524_a_at | turquoise | catenin beta interacting protein 1(CTNBP1)                                                                    | Homo sapiens |
| 3298 | 11745537_a_at | turquoise | nuclear factor of activated T-cells 3(NFATC3)                                                                 | Homo sapiens |
| 3301 | 11745560_a_at | turquoise | dedicator of cytokinesis 8(DOCK8)                                                                             | Homo sapiens |
| 3302 | 11745602_s_at | turquoise | clathrin light chain A(CLTA)                                                                                  | Homo sapiens |
| 3303 | 11745648_x_at | turquoise | eukaryotic translation elongation factor 1 alpha 1(EEF1A1)                                                    | Homo sapiens |
| 3304 | 11745737_x_at | turquoise | acyl-CoA dehydrogenase, very long chain(ACADVL)                                                               | Homo sapiens |
| 3305 | 11745742_s_at | turquoise | FYVE, RhoGEF and PH domain containing 3(FGD3)                                                                 | Homo sapiens |
| 3306 | 11745772_x_at | turquoise | TNF receptor superfamily member 14(TNFRSF14)                                                                  | Homo sapiens |
| 3307 | 11745773_a_at | turquoise | TNF receptor superfamily member 14(TNFRSF14)                                                                  | Homo sapiens |
| 3308 | 11745775_a_at | turquoise | lipase A, lysosomal acid type(LIPA)                                                                           | Homo sapiens |
| 3309 | 11745801_s_at | turquoise | adenylate cyclase associated protein 1(CAP1)                                                                  | Homo sapiens |
| 3311 | 11745833_s_at | turquoise | epithelial cell transforming 2(ECT2)                                                                          | Homo sapiens |
| 3312 | 11745840_a_at | turquoise | progesterin and adipoQ receptor family member 8(PAQR8)                                                        | Homo sapiens |
| 3313 | 11745841_a_at | turquoise | CNDP dipeptidase 2 (metallopeptidase M20 family)(CNDP2)                                                       | Homo sapiens |
| 3314 | 11745854_a_at | turquoise | ring finger protein 145(RNF145)                                                                               | Homo sapiens |
| 3317 | 11745860_x_at | turquoise | ATP5S like(ATP5SL)                                                                                            | Homo sapiens |
| 3319 | 11745884_a_at | turquoise | ubiquitin conjugating enzyme E2 Z(UBE2Z)                                                                      | Homo sapiens |
| 3320 | 11745892_a_at | turquoise | methylenetetrahydrofolate dehydrogenase (NADP+ dependent) 2, methylenetetrahydrofolate cyclohydrolase(MTHFD2) | Homo sapiens |
| 3321 | 11745893_s_at | turquoise | methylenetetrahydrofolate dehydrogenase (NADP+ dependent) 2, methylenetetrahydrofolate cyclohydrolase(MTHFD2) | Homo sapiens |
| 3322 | 11745894_x_at | turquoise | TNF receptor superfamily member 14(TNFRSF14)                                                                  | Homo sapiens |
| 3323 | 11745902_a_at | turquoise | NPC intracellular cholesterol transporter 2(NPC2)                                                             | Homo sapiens |
| 3324 | 11745903_a_at | turquoise | SLAM family member 7(SLAMF7)                                                                                  | Homo sapiens |
| 3325 | 11745912_a_at | turquoise | pellino E3 ubiquitin protein ligase 1(PELI1)                                                                  | Homo sapiens |
| 3326 | 11745922_a_at | turquoise | monoamine oxidase A(MAOA)                                                                                     | Homo sapiens |
| 3327 | 11745923_x_at | turquoise | monoamine oxidase A(MAOA)                                                                                     | Homo sapiens |
| 3328 | 11745926_a_at | turquoise | ADAM metallopeptidase domain 15(ADAM15)                                                                       | Homo sapiens |
| 3329 | 11745927_x_at | turquoise | ADAM metallopeptidase domain 15(ADAM15)                                                                       | Homo sapiens |
| 3330 | 11745930_a_at | turquoise | p21 (RAC1) activated kinase 6(PAK6)                                                                           | Homo sapiens |
| 3331 | 11745932_x_at | turquoise | thymosin beta 10(TMSB10)                                                                                      | Homo sapiens |
| 3332 | 11745936_a_at | turquoise | solute carrier family 50 member 1(SLC50A1)                                                                    | Homo sapiens |
| 3333 | 11745938_a_at | turquoise | absent in melanoma 1(AIM1)                                                                                    | Homo sapiens |
| 3334 | 11745988_a_at | turquoise | ADP dependent glucokinase(ADPGK)                                                                              | Homo sapiens |
| 3335 | 11745989_a_at | turquoise | major histocompatibility complex, class II, DM alpha(HLA-DMA)                                                 | Homo sapiens |
| 3336 | 11745991_a_at | turquoise | UV radiation resistance associated(UVRAG)                                                                     | Homo sapiens |
| 3337 | 11745998_a_at | turquoise | zinc finger protein 252, pseudogene(ZNF252P)                                                                  | Homo sapiens |
| 3338 | 11746002_a_at | turquoise | caspase 4(CASP4)                                                                                              | Homo sapiens |
| 3339 | 11746003_a_at | turquoise | DNA polymerase delta interacting protein 2(POLDIP2)                                                           | Homo sapiens |
| 3340 | 11746014_s_at | turquoise | neutrophil cytosolic factor 1(NCF1)                                                                           | Homo sapiens |
| 3341 | 11746027_a_at | turquoise | N-myc and STAT interactor(NMI)                                                                                | Homo sapiens |
| 3342 | 11746028_x_at | turquoise | N-myc and STAT interactor(NMI)                                                                                | Homo sapiens |
| 3343 | 11746041_a_at | turquoise | transformer 2 beta homolog (Drosophila)(TRA2B)                                                                | Homo sapiens |
| 3344 | 11746042_s_at | turquoise | transformer 2 beta homolog (Drosophila)(TRA2B)                                                                | Homo sapiens |
| 3345 | 11746048_s_at | turquoise | adenosine deaminase like(ADAL)                                                                                | Homo sapiens |
| 3346 | 11746053_x_at | turquoise | uncharacterized LOC100996740(LOC100996740)                                                                    | Homo sapiens |
| 3347 | 11746060_a_at | turquoise | TNF alpha induced protein 2(TNFAIP2)                                                                          | Homo sapiens |
| 3348 | 11746079_a_at | turquoise | adenylate cyclase 7(ADCY7)                                                                                    | Homo sapiens |
| 3350 | 11746087_a_at | turquoise | CD84 molecule(CD84)                                                                                           | Homo sapiens |
| 3351 | 11746088_a_at | turquoise | interferon induced protein 44(IFI44)                                                                          | Homo sapiens |
| 3352 | 11746092_a_at | turquoise | rogdi homolog(ROGDI)                                                                                          | Homo sapiens |
| 3353 | 11746135_x_at | turquoise | microRNA 1292(MIR1292)                                                                                        | Homo sapiens |
| 3354 | 11746149_x_at | turquoise | butyrylcholinesterase(BCHE)                                                                                   | Homo sapiens |
| 3355 | 11746155_a_at | turquoise | interferon regulatory factor 9(IRF9)                                                                          | Homo sapiens |
| 3356 | 11746156_x_at | turquoise | interferon regulatory factor 9(IRF9)                                                                          | Homo sapiens |
| 3357 | 11746159_a_at | turquoise | PBX homeobox 3(PBX3)                                                                                          | Homo sapiens |
| 3358 | 11746162_a_at | turquoise | family with sequence similarity 49 member B(FAM49B)                                                           | Homo sapiens |
| 3359 | 11746175_a_at | turquoise | apolipoprotein L4(APOL4)                                                                                      | Homo sapiens |
| 3360 | 11746217_a_at | turquoise | HPS3, biogenesis of lysosomal organelles complex 2 subunit 1(HPS3)                                            | Homo sapiens |
| 3361 | 11746242_a_at | turquoise | aryl hydrocarbon receptor nuclear translocator like 2(ARNTL2)                                                 | Homo sapiens |
| 3362 | 11746251_x_at | turquoise | chloride intracellular channel 1(CLIC1)                                                                       | Homo sapiens |
| 3363 | 11746269_a_at | turquoise | abhydrolase domain containing 3(ABHD3)                                                                        | Homo sapiens |
| 3364 | 11746273_x_at | turquoise | dihydrouridine synthase 4 like(DUS4L)                                                                         | Homo sapiens |
| 3365 | 11746286_s_at | turquoise | butyrophilin subfamily 3 member A2(BTN3A2)                                                                    | Homo sapiens |
| 3366 | 11746309_a_at | turquoise | solute carrier family 15 member 3(SLC15A3)                                                                    | Homo sapiens |
| 3367 | 11746321_s_at | turquoise | serpin family H member 1(SERP1H1)                                                                             | Homo sapiens |
| 3369 | 11746340_a_at | turquoise | nucleolar protein 8(NOL8)                                                                                     | Homo sapiens |
| 3370 | 11746347_s_at | turquoise | beta-1,3-glucuronyltransferase 3(B3GAT3)                                                                      | Homo sapiens |
| 3371 | 11746350_a_at | turquoise | Pim-1 proto-oncogene, serine/threonine kinase(PIM1)                                                           | Homo sapiens |
| 3372 | 11746370_a_at | turquoise | ectonucleoside triphosphate diphosphohydrolase 6 (putative)(ENTPD6)                                           | Homo sapiens |
| 3374 | 11746376_a_at | turquoise | interleukin 16(IL16)                                                                                          | Homo sapiens |
| 3375 | 11746400_a_at | turquoise | myosin light chain kinase 3(MYLK3)                                                                            | Homo sapiens |
| 3376 | 11746407_x_at | turquoise | toil like receptor 10(TLR10)                                                                                  | Homo sapiens |
| 3377 | 11746414_a_at | turquoise | family with sequence similarity 107 member B(FAM107B)                                                         | Homo sapiens |
| 3378 | 11746418_a_at | turquoise | vitrin(VIT)                                                                                                   | Homo sapiens |
| 3379 | 11746439_a_at | turquoise | glyoxalase I(GLO1)                                                                                            | Homo sapiens |
| 3380 | 11746449_a_at | turquoise | Meis homeobox 2(MEIS2)                                                                                        | Homo sapiens |

|      |               |           |                                                                         |              |
|------|---------------|-----------|-------------------------------------------------------------------------|--------------|
| 3381 | 11746450_x_at | turquoise | Meis homeobox 2(MEIS2)                                                  | Homo sapiens |
| 3382 | 11746465_a_at | turquoise | epidermal growth factor receptor pathway substrate 15 like 1(EPS15L1)   | Homo sapiens |
| 3383 | 11746516_a_at | turquoise | ADAM metallopeptidase domain 15(ADAM15)                                 | Homo sapiens |
| 3384 | 11746524_a_at | turquoise | family with sequence similarity 81 member A(FAM81A)                     | Homo sapiens |
| 3385 | 11746529_x_at | turquoise | TNF receptor superfamily member 14(TNFRSF14)                            | Homo sapiens |
| 3386 | 11746557_s_at | turquoise | galectin 9B(LGALS9B)                                                    | Homo sapiens |
| 3387 | 11746558_x_at | turquoise | galectin 9(LGALS9)                                                      | Homo sapiens |
| 3388 | 11746568_x_at | turquoise | hypoxia inducible factor 3 alpha subunit(HIF3A)                         | Homo sapiens |
| 3389 | 11746584_x_at | turquoise | metal response element binding transcription factor 2(MTF2)             | Homo sapiens |
| 3391 | 11746596_a_at | turquoise | NAD kinase(NADK)                                                        | Homo sapiens |
| 3392 | 11746609_a_at | turquoise | cullin associated and neddylation dissociated 2 (putative)(CAND2)       | Homo sapiens |
| 3393 | 11746626_a_at | turquoise | hydroxyacylglutathione hydrolase(HAGH)                                  | Homo sapiens |
| 3394 | 11746631_a_at | turquoise | centrosomal protein 41(CEP41)                                           | Homo sapiens |
| 3395 | 11746635_a_at | turquoise | lymphoid enhancer binding factor 1(LEF1)                                | Homo sapiens |
| 3396 | 11746638_a_at | turquoise | dehydrogenase/reductase 11(DHRS11)                                      | Homo sapiens |
| 3397 | 11746639_a_at | turquoise | Ras association domain family member 2(RASSF2)                          | Homo sapiens |
| 3399 | 11746658_a_at | turquoise | CD86 molecule(CD86)                                                     | Homo sapiens |
| 3400 | 11746659_a_at | turquoise | nuclear receptor subfamily 2 group F member 6(NR2F6)                    | Homo sapiens |
| 3401 | 11746686_a_at | turquoise | G kinase anchoring protein 1(GKAP1)                                     | Homo sapiens |
| 3402 | 11746692_a_at | turquoise | bromodomain adjacent to zinc finger domain 1A(BAZ1A)                    | Homo sapiens |
| 3403 | 11746705_a_at | turquoise | regulator of G-protein signaling 16(RGS16)                              | Homo sapiens |
| 3404 | 11746710_a_at | turquoise | dedicator of cytokinesis 10(DOCK10)                                     | Homo sapiens |
| 3405 | 11746729_a_at | turquoise | lymphoid restricted membrane protein(LRMP)                              | Homo sapiens |
| 3406 | 11746736_a_at | turquoise | calcium voltage-gated channel auxiliary subunit alpha2delta 3(CACNA2D3) | Homo sapiens |
| 3407 | 11746767_a_at | turquoise | integrin subunit alpha 4(ITGA4)                                         | Homo sapiens |
| 3408 | 11746778_a_at | turquoise | intersectin 1(ITSN1)                                                    | Homo sapiens |
| 3409 | 11746779_a_at | turquoise | nuclear receptor coactivator 7(NCOA7)                                   | Homo sapiens |
| 3410 | 11746804_x_at | turquoise | major histocompatibility complex, class II, DQ beta 1(HLA-DQB1)         | Homo sapiens |
| 3414 | 11746868_a_at | turquoise | GIT ArfGAP 2(GIT2)                                                      | Homo sapiens |
| 3415 | 11746874_a_at | turquoise | G protein subunit alpha i2(GNAI2)                                       | Homo sapiens |
| 3416 | 11746875_x_at | turquoise | G protein subunit alpha i2(GNAI2)                                       | Homo sapiens |
| 3417 | 11746878_s_at | turquoise | inhibitor of DNA binding 2, HLH protein(ID2)                            | Homo sapiens |
| 3418 | 11746880_x_at | turquoise | filamin A(FLN1)                                                         | Homo sapiens |
| 3419 | 11746906_s_at | turquoise | caspase recruitment domain family member 8(CARD8)                       | Homo sapiens |
| 3421 | 11746935_a_at | turquoise | tryptophanyl tRNA synthetase 2, mitochondrial(WARS2)                    | Homo sapiens |
| 3422 | 11746954_s_at | turquoise | C-C motif chemokine ligand 4 like 1(CCL4L1)                             | Homo sapiens |
| 3423 | 11746961_a_at | turquoise | major histocompatibility complex, class II, DM beta(HLA-DMB)            | Homo sapiens |
| 3424 | 11746962_x_at | turquoise | major histocompatibility complex, class II, DM beta(HLA-DMB)            | Homo sapiens |
| 3425 | 11746965_a_at | turquoise | alanyl aminopeptidase, membrane(ANPEP)                                  | Homo sapiens |
| 3426 | 11746972_a_at | turquoise | membrane associated ring-CH-type finger 1(MARCH1)                       | Homo sapiens |
| 3427 | 11746995_a_at | turquoise | N-acetylneuraminatase pyruvate lyase(NPL)                               | Homo sapiens |
| 3428 | 11747004_a_at | turquoise | sulfite oxidase(SUOX)                                                   | Homo sapiens |
| 3430 | 11747019_a_at | turquoise | Rho GTPase activating protein 45(ARHGAP45)                              | Homo sapiens |
| 3431 | 11747020_x_at | turquoise | Rho GTPase activating protein 45(ARHGAP45)                              | Homo sapiens |
| 3432 | 11747076_a_at | turquoise | microRNA 6837(MIR6837)                                                  | Homo sapiens |
| 3433 | 11747077_x_at | turquoise | eukaryotic translation elongation factor 1 alpha 1(EEF1A1)              | Homo sapiens |
| 3434 | 11747086_a_at | turquoise | grancalcin(GCA)                                                         | Homo sapiens |
| 3435 | 11747110_a_at | turquoise | PAS domain containing serine/threonine kinase(PASK)                     | Homo sapiens |
| 3436 | 11747113_a_at | turquoise | CD160 molecule(CD160)                                                   | Homo sapiens |
| 3438 | 11747135_x_at | turquoise | centriolin(CNTRL)                                                       | Homo sapiens |
| 3439 | 11747137_x_at | turquoise | endoplasmic reticulum aminopeptidase 2(ERAP2)                           | Homo sapiens |
| 3440 | 11747147_a_at | turquoise | protein phosphatase 2 scaffold subunit Abeta(PPP2R1B)                   | Homo sapiens |
| 3441 | 11747189_a_at | turquoise | B-cell CLL/lymphoma 11A(BCL11A)                                         | Homo sapiens |
| 3442 | 11747190_a_at | turquoise | FCH and double SH3 domains 1(FCHSD1)                                    | Homo sapiens |
| 3443 | 11747212_a_at | turquoise | zinc finger protein 174(ZNF174)                                         | Homo sapiens |
| 3444 | 11747230_a_at | turquoise | BUB1 mitotic checkpoint serine/threonine kinase(BUB1)                   | Homo sapiens |
| 3445 | 11747247_x_at | turquoise | RAP1B, member of RAS oncogene family(RAP1B)                             | Homo sapiens |
| 3446 | 11747249_a_at | turquoise | adenylosuccinate synthase(ADSS)                                         | Homo sapiens |
| 3447 | 11747276_a_at | turquoise | A-kinase anchoring protein 1(AKAP1)                                     | Homo sapiens |
| 3449 | 11747282_x_at | turquoise | annexin A2 pseudogene 2(ANXA2P2)                                        | Homo sapiens |
| 3450 | 11747285_a_at | turquoise | target of myb1 like 1 membrane trafficking protein(TOM1L1)              | Homo sapiens |
| 3451 | 11747295_a_at | turquoise | perforin 1(PRF1)                                                        | Homo sapiens |
| 3452 | 11747301_a_at | turquoise | SP100 nuclear antigen(SP100)                                            | Homo sapiens |
| 3457 | 11747381_a_at | turquoise | septin 1(SEPT1)                                                         | Homo sapiens |
| 3459 | 11747408_x_at | turquoise | filamin binding LIM protein 1(FBLIM1)                                   | Homo sapiens |
| 3460 | 11747418_a_at | turquoise | napsin B aspartic peptidase, pseudogene(NAPSB)                          | Homo sapiens |
| 3461 | 11747437_a_at | turquoise | caspase recruitment domain family member 8(CARD8)                       | Homo sapiens |
| 3462 | 11747438_a_at | turquoise | GTPase, IMAP family member 4(GIMAP4)                                    | Homo sapiens |
| 3463 | 11747439_a_at | turquoise | myosin light chain 6(MYL6)                                              | Homo sapiens |
| 3464 | 11747446_s_at | turquoise | major histocompatibility complex, class II, DO beta(HLA-DOB)            | Homo sapiens |
| 3465 | 11747448_x_at | turquoise | butyrophilin subfamily 3 member A2(BTN3A2)                              | Homo sapiens |
| 3466 | 11747449_s_at | turquoise | D-2-hydroxyglutarate dehydrogenase(D2HGDH)                              | Homo sapiens |
| 3467 | 11747453_a_at | turquoise | protein phosphatase 1 regulatory subunit 18(PPP1R18)                    | Homo sapiens |
| 3468 | 11747460_x_at | turquoise | transgelin 2(TAGLN2)                                                    | Homo sapiens |
| 3469 | 11747467_a_at | turquoise | protein kinase C theta(PRKCQ)                                           | Homo sapiens |
| 3470 | 11747483_a_at | turquoise | TNF alpha induced protein 8(TNFAIP8)                                    | Homo sapiens |
| 3471 | 11747499_a_at | turquoise | intercellular adhesion molecule 1(ICAM1)                                | Homo sapiens |
| 3472 | 11747502_s_at | turquoise | mitochondrial translational release factor 1 like(MTRF1L)               | Homo sapiens |
| 3473 | 11747508_a_at | turquoise | erythrocyte membrane protein band 4.1 like 3(EPB41L3)                   | Homo sapiens |
| 3474 | 11747509_a_at | turquoise | family with sequence similarity 107 member B(FAM107B)                   | Homo sapiens |
| 3475 | 11747523_a_at | turquoise | TNF receptor associated factor 4(TRAF4)                                 | Homo sapiens |
| 3477 | 11747538_a_at | turquoise | myeloid differentiation primary response 88(MYD88)                      | Homo sapiens |

|      |               |           |                                                                                         |              |
|------|---------------|-----------|-----------------------------------------------------------------------------------------|--------------|
| 3478 | 11747539_x_at | turquoise | myeloid differentiation primary response 88(MYD88)                                      | Homo sapiens |
| 3482 | 11747590_a_at | turquoise | Fc fragment of IgM receptor(FCMR)                                                       | Homo sapiens |
| 3483 | 11747591_a_at | turquoise | GLI pathogenesis related 1(GLIPR1)                                                      | Homo sapiens |
| 3484 | 11747593_a_at | turquoise | SH3 domain binding glutamate rich protein like(SH3BGRL)                                 | Homo sapiens |
| 3485 | 11747594_x_at | turquoise | SH3 domain binding glutamate rich protein like(SH3BGRL)                                 | Homo sapiens |
| 3486 | 11747597_x_at | turquoise | C-type lectin domain family 2 member D(CLECD2D)                                         | Homo sapiens |
| 3487 | 11747602_a_at | turquoise | mitogen-activated protein kinase kinase kinase 8(MAP3K8)                                | Homo sapiens |
| 3488 | 11747607_a_at | turquoise | purinergic receptor P2X 7(P2RX7)                                                        | Homo sapiens |
| 3489 | 11747623_a_at | turquoise | Rho GTPase activating protein 25(ARHGAP25)                                              | Homo sapiens |
| 3490 | 11747627_s_at | turquoise | tRNA-yW synthesizing protein 1 homolog B(TYW1B)                                         | Homo sapiens |
| 3491 | 11747630_a_at | turquoise | XIAP associated factor 1(XAF1)                                                          | Homo sapiens |
| 3492 | 11747631_x_at | turquoise | XIAP associated factor 1(XAF1)                                                          | Homo sapiens |
| 3493 | 11747643_s_at | turquoise | BUB3, mitotic checkpoint protein(BUB3)                                                  | Homo sapiens |
| 3494 | 11747652_a_at | turquoise | cell division cycle 25B(CDC25B)                                                         | Homo sapiens |
| 3495 | 11747653_x_at | turquoise | cell division cycle 25B(CDC25B)                                                         | Homo sapiens |
| 3496 | 11747666_a_at | turquoise | tryptophanyl-tRNA synthetase(WARS)                                                      | Homo sapiens |
| 3498 | 11747680_a_at | turquoise | thyroid hormone receptor, alpha(THRA)                                                   | Homo sapiens |
| 3499 | 11747681_x_at | turquoise | thyroid hormone receptor, alpha(THRA)                                                   | Homo sapiens |
| 3500 | 11747714_a_at | turquoise | ATP binding cassette subfamily A member 8(ABCA8)                                        | Homo sapiens |
| 3501 | 11747723_a_at | turquoise | death domain associated protein(DAXX)                                                   | Homo sapiens |
| 3502 | 11747726_s_at | turquoise | syntaxin binding protein 6(STXBP6)                                                      | Homo sapiens |
| 3503 | 11747731_a_at | turquoise | DBF4 zinc finger(DBF4)                                                                  | Homo sapiens |
| 3504 | 11747742_a_at | turquoise | metal response element binding transcription factor 2(MTF2)                             | Homo sapiens |
| 3505 | 11747743_x_at | turquoise | metal response element binding transcription factor 2(MTF2)                             | Homo sapiens |
| 3507 | 11747785_s_at | turquoise | lymphocyte cytosolic protein 1(LCP1)                                                    | Homo sapiens |
| 3508 | 11747799_x_at | turquoise | enolase 1(ENO1)                                                                         | Homo sapiens |
| 3509 | 11747803_a_at | turquoise | CDC like kinase 2(CLK2)                                                                 | Homo sapiens |
| 3510 | 11747811_x_at | turquoise | GRINL1A complex locus 1(GCOM1)                                                          | Homo sapiens |
| 3511 | 11747820_x_at | turquoise | uridine phosphorylase 1(UPP1)                                                           | Homo sapiens |
| 3512 | 11747895_a_at | turquoise | tectonic family member 1(TCTN1)                                                         | Homo sapiens |
| 3514 | 11747926_s_at | turquoise | interferon gamma inducible protein 16(IFI16)                                            | Homo sapiens |
| 3515 | 11747935_a_at | turquoise | tenascin C(TNC)                                                                         | Homo sapiens |
| 3516 | 11747948_a_at | turquoise | small ArfGAP2(SMAP2)                                                                    | Homo sapiens |
| 3517 | 11747952_x_at | turquoise | tumor necrosis factor superfamily member 10(TNFSF10)                                    | Homo sapiens |
| 3518 | 11747961_a_at | turquoise | proteasome subunit beta 8(PSMB8)                                                        | Homo sapiens |
| 3519 | 11747981_a_at | turquoise | APC down-regulated 1(APCDD1)                                                            | Homo sapiens |
| 3520 | 11748003_a_at | turquoise | interferon induced protein 44(IFI44)                                                    | Homo sapiens |
| 3523 | 11748034_a_at | turquoise | cytidine monophospho-N-acetylneuraminic acid hydroxylase, pseudogene(CMAHP)             | Homo sapiens |
| 3524 | 11748088_a_at | turquoise | A-kinase anchoring protein 1(AKAP1)                                                     | Homo sapiens |
| 3525 | 11748097_x_at | turquoise | poly(A) binding protein cytoplasmic 1(PABPC1)                                           | Homo sapiens |
| 3526 | 11748099_a_at | turquoise | phosphatase and actin regulator 3(PHACTR3)                                              | Homo sapiens |
| 3527 | 11748120_a_at | turquoise | lymphocyte cytosolic protein 2(LCP2)                                                    | Homo sapiens |
| 3529 | 11748149_a_at | turquoise | formin binding protein 1(FNBP1)                                                         | Homo sapiens |
| 3530 | 11748188_a_at | turquoise | alpha-N-acetylgalactosaminidase(NAGA)                                                   | Homo sapiens |
| 3532 | 11748229_x_at | turquoise | interleukin 15 receptor subunit alpha(IL15RA)                                           | Homo sapiens |
| 3533 | 11748230_a_at | turquoise | coronin 1A(CORO1A)                                                                      | Homo sapiens |
| 3534 | 11748249_a_at | turquoise | NDRG family member 3(NDRG3)                                                             | Homo sapiens |
| 3535 | 11748250_x_at | turquoise | NDRG family member 3(NDRG3)                                                             | Homo sapiens |
| 3537 | 11748254_s_at | turquoise | male-specific lethal 3 homolog (Drosophila)(MSL3)                                       | Homo sapiens |
| 3539 | 11748280_a_at | turquoise | serpin family B member 1(SERPINB1)                                                      | Homo sapiens |
| 3540 | 11748281_s_at | turquoise | cyclin and CBS domain divalent metal cation transport mediator 4(CNNM4)                 | Homo sapiens |
| 3541 | 11748301_a_at | turquoise | transcription factor Dp-2(TFDP2)                                                        | Homo sapiens |
| 3542 | 11748304_a_at | turquoise | ectonucleoside triphosphate diphosphohydrolase 6 (putative)(ENTPD6)                     | Homo sapiens |
| 3544 | 11748332_x_at | turquoise | major histocompatibility complex, class I, E(HLA-E)                                     | Homo sapiens |
| 3545 | 11748339_a_at | turquoise | leukocyte associated immunoglobulin like receptor 1(LAIR1)                              | Homo sapiens |
| 3546 | 11748340_x_at | turquoise | leukocyte associated immunoglobulin like receptor 1(LAIR1)                              | Homo sapiens |
| 3549 | 11748359_s_at | turquoise | BCR, RhoGEF and GTPase activating protein(BCR)                                          | Homo sapiens |
| 3550 | 11748362_s_at | turquoise | ATP binding cassette subfamily C member 3(ABCC3)                                        | Homo sapiens |
| 3551 | 11748400_s_at | turquoise | tropomyosin 4(TPM4)                                                                     | Homo sapiens |
| 3552 | 11748401_x_at | turquoise | tropomyosin 4(TPM4)                                                                     | Homo sapiens |
| 3554 | 11748483_a_at | turquoise | purinergic receptor P2X 7(P2RX7)                                                        | Homo sapiens |
| 3555 | 11748492_a_at | turquoise | layilin(LAYN)                                                                           | Homo sapiens |
| 3556 | 11748497_s_at | turquoise | grancalcin(GCA)                                                                         | Homo sapiens |
| 3558 | 11748529_x_at | turquoise | caspase 4(CASP4)                                                                        | Homo sapiens |
| 3559 | 11748531_x_at | turquoise | calcium channel flower domain containing 1(CACFD1)                                      | Homo sapiens |
| 3561 | 11748548_a_at | turquoise | purinergic receptor P2X 4(P2RX4)                                                        | Homo sapiens |
| 3563 | 11748555_a_at | turquoise | cyclin dependent kinase like 3(CDKL3)                                                   | Homo sapiens |
| 3564 | 11748582_a_at | turquoise | ADP-ribosyltransferase 3(ART3)                                                          | Homo sapiens |
| 3566 | 11748604_a_at | turquoise | death associated protein kinase 2(DAPK2)                                                | Homo sapiens |
| 3568 | 11748650_a_at | turquoise | ADAM metallopeptidase domain 33(ADAM33)                                                 | Homo sapiens |
| 3569 | 11748654_a_at | turquoise | protein tyrosine phosphatase, non-receptor type 22(PTPN22)                              | Homo sapiens |
| 3572 | 11748702_x_at | turquoise | annexin A4(ANXA4)                                                                       | Homo sapiens |
| 3573 | 11748713_a_at | turquoise | abnormal spindle microtubule assembly(ASPM)                                             | Homo sapiens |
| 3574 | 11748747_a_at | turquoise | Rho GTPase activating protein 25(ARHGAP25)                                              | Homo sapiens |
| 3575 | 11748755_a_at | turquoise | Meis homeobox 2(MEIS2)                                                                  | Homo sapiens |
| 3576 | 11748775_a_at | turquoise | uridine phosphorylase 1(UPP1)                                                           | Homo sapiens |
| 3577 | 11748780_a_at | turquoise | target of myb1 like 1 membrane trafficking protein(TOM1L1)                              | Homo sapiens |
| 3578 | 11748786_a_at | turquoise | thymocyte expressed, positive selection associated 1(TESPA1)                            | Homo sapiens |
| 3579 | 11748808_a_at | turquoise | AT-rich interaction domain 3B(ARID3B)                                                   | Homo sapiens |
| 3581 | 11748841_a_at | turquoise | SAM and HD domain containing deoxynucleoside triphosphate triphosphohydrolase 1(SAMHD1) | Homo sapiens |
| 3582 | 11748845_a_at | turquoise | SLAM family member 7(SLAMF7)                                                            | Homo sapiens |
| 3584 | 11748859_a_at | turquoise | transcription factor EC(TFEC)                                                           | Homo sapiens |

|      |               |           |                                                                                         |              |
|------|---------------|-----------|-----------------------------------------------------------------------------------------|--------------|
| 3587 | 11748897_a_at | turquoise | putative aquaporin-7-like protein 3(LOC100509620)                                       | Homo sapiens |
| 3588 | 11748905_a_at | turquoise | collagen triple helix repeat containing 1(CTHRC1)                                       | Homo sapiens |
| 3589 | 11748907_a_at | turquoise | retinoic acid receptor responder 3(RARRES3)                                             | Homo sapiens |
| 3590 | 11748915_a_at | turquoise | glutamic-pyruvic transaminase(GPT)                                                      | Homo sapiens |
| 3591 | 11748972_a_at | turquoise | cell division cycle 25B(CDC25B)                                                         | Homo sapiens |
| 3592 | 11748973_x_at | turquoise | cell division cycle 25B(CDC25B)                                                         | Homo sapiens |
| 3593 | 11749002_a_at | turquoise | Rho GTPase activating protein 45(ARHGAP45)                                              | Homo sapiens |
| 3594 | 11749003_a_at | turquoise | endoplasmic reticulum aminopeptidase 1(ERAP1)                                           | Homo sapiens |
| 3595 | 11749016_a_at | turquoise | uncharacterized LOC100130460(CAND1.11)                                                  | Homo sapiens |
| 3596 | 11749026_a_at | turquoise | protein tyrosine phosphatase, receptor type A(PTPRA)                                    | Homo sapiens |
| 3597 | 11749040_a_at | turquoise | phosphoglucomutase 2(PGM2)                                                              | Homo sapiens |
| 3598 | 11749059_x_at | turquoise | reticulon 4(RTN4)                                                                       | Homo sapiens |
| 3599 | 11749092_a_at | turquoise | NLR family member X1(NLRX1)                                                             | Homo sapiens |
| 3600 | 11749094_a_at | turquoise | dermatan sulfate epimerase(DSE)                                                         | Homo sapiens |
| 3601 | 11749097_a_at | turquoise | ATP binding cassette subfamily A member 8(ABCA8)                                        | Homo sapiens |
| 3602 | 11749104_x_at | turquoise | Rho GTPase activating protein 45(ARHGAP45)                                              | Homo sapiens |
| 3603 | 11749121_a_at | turquoise | interferon alpha and beta receptor subunit 2(IFNAR2)                                    | Homo sapiens |
| 3604 | 11749132_a_at | turquoise | solute carrier organic anion transporter family member 2B1(SLCO2B1)                     | Homo sapiens |
| 3605 | 11749141_a_at | turquoise | TNF receptor associated factor 5(TRAF5)                                                 | Homo sapiens |
| 3607 | 11749164_a_at | turquoise | transmembrane protein 206(TMEM206)                                                      | Homo sapiens |
| 3608 | 11749171_a_at | turquoise | beta-ureidopropionase 1(UPB1)                                                           | Homo sapiens |
| 3609 | 11749188_a_at | turquoise | ectonucleoside triphosphate diphosphohydrolase 1(ENTPD1)                                | Homo sapiens |
| 3611 | 11749214_a_at | turquoise | selectin P ligand(SELPLG)                                                               | Homo sapiens |
| 3612 | 11749225_a_at | turquoise | butyrophilin subfamily 2 member A2(BTN2A2)                                              | Homo sapiens |
| 3614 | 11749245_a_at | turquoise | C-X-C motif chemokine ligand 11(CXCL11)                                                 | Homo sapiens |
| 3616 | 11749265_a_at | turquoise | putative aquaporin-7-like protein 3(LOC100509620)                                       | Homo sapiens |
| 3617 | 11749275_a_at | turquoise | src kinase associated phosphoprotein 2(SKAP2)                                           | Homo sapiens |
| 3618 | 11749293_x_at | turquoise | membrane spanning 4-domains A6A(MS4A6A)                                                 | Homo sapiens |
| 3619 | 11749309_a_at | turquoise | prune exopolyphosphatase(PRUNE1)                                                        | Homo sapiens |
| 3620 | 11749310_x_at | turquoise | prune exopolyphosphatase(PRUNE1)                                                        | Homo sapiens |
| 3622 | 11749326_s_at | turquoise | olfactomedin like 2B(OLFML2B)                                                           | Homo sapiens |
| 3623 | 11749329_a_at | turquoise | Rho GTPase activating protein 9(ARHGAP9)                                                | Homo sapiens |
| 3624 | 11749367_a_at | turquoise | FXID domain containing ion transport regulator 5(FXYD5)                                 | Homo sapiens |
| 3626 | 11749370_x_at | turquoise | XIAP associated factor 1(XAF1)                                                          | Homo sapiens |
| 3627 | 11749377_a_at | turquoise | cat eye syndrome chromosome region, candidate 1(CECR1)                                  | Homo sapiens |
| 3628 | 11749391_x_at | turquoise | quinolinate phosphoribosyltransferase(QPRT)                                             | Homo sapiens |
| 3632 | 11749402_a_at | turquoise | integrin subunit alpha L(ITGAL)                                                         | Homo sapiens |
| 3633 | 11749412_a_at | turquoise | poly(ADP-ribose) polymerase family member 14(PARP14)                                    | Homo sapiens |
| 3634 | 11749416_a_at | turquoise | small nucleolar RNA host gene 4(SNHG4)                                                  | Homo sapiens |
| 3636 | 11749445_a_at | turquoise | uncharacterized LOC101928361(LOC101928361)                                              | Homo sapiens |
| 3637 | 11749492_a_at | turquoise | ribosomal protein S6 kinase A1(RPS6KA1)                                                 | Homo sapiens |
| 3638 | 11749497_a_at | turquoise | DExH-box helicase 58(DHX58)                                                             | Homo sapiens |
| 3639 | 11749510_a_at | turquoise | SAM and HD domain containing deoxynucleoside triphosphate triphosphohydrolase 1(SAMHD1) | Homo sapiens |
| 3640 | 11749512_a_at | turquoise | signal transducer and activator of transcription 4(STAT4)                               | Homo sapiens |
| 3641 | 11749522_a_at | turquoise | lymphocyte activating 3(LAG3)                                                           | Homo sapiens |
| 3642 | 11749541_a_at | turquoise | sushi domain containing 4(SUSD4)                                                        | Homo sapiens |
| 3643 | 11749550_a_at | turquoise | serine carboxypeptidase 1(SCPEP1)                                                       | Homo sapiens |
| 3644 | 11749573_a_at | turquoise | arrestin beta 2(ARRB2)                                                                  | Homo sapiens |
| 3645 | 11749578_a_at | turquoise | COX10, heme A:farnesyltransferase cytochrome c oxidase assembly factor(COX10)           | Homo sapiens |
| 3646 | 11749587_x_at | turquoise | Fc fragment of IgG receptor IIa(FcGR2A)                                                 | Homo sapiens |
| 3647 | 11749589_x_at | turquoise | cathepsin S(CTSS)                                                                       | Homo sapiens |
| 3648 | 11749595_a_at | turquoise | guanylate binding protein 4(GBP4)                                                       | Homo sapiens |
| 3649 | 11749613_a_at | turquoise | OClA domain containing 1(OClAD1)                                                        | Homo sapiens |
| 3650 | 11749625_a_at | turquoise | PQ loop repeat containing 3(PQLC3)                                                      | Homo sapiens |
| 3651 | 11749660_a_at | turquoise | Mov10 RISC complex RNA helicase(MOV10)                                                  | Homo sapiens |
| 3652 | 11749674_a_at | turquoise | shootin 1(SHTN1)                                                                        | Homo sapiens |
| 3653 | 11749676_x_at | turquoise | B-cell CLL/lymphoma 11A(BCL11A)                                                         | Homo sapiens |
| 3656 | 11749708_a_at | turquoise | Fli-1 proto-oncogene, ETS transcription factor(FLI1)                                    | Homo sapiens |
| 3658 | 11749740_a_at | turquoise | ubiquitin specific peptidase 3(USP3)                                                    | Homo sapiens |
| 3659 | 11749750_a_at | turquoise | WAS/WASL interacting protein family member 1(WIPF1)                                     | Homo sapiens |
| 3660 | 11749751_s_at | turquoise | WAS/WASL interacting protein family member 1(WIPF1)                                     | Homo sapiens |
| 3661 | 11749752_x_at | turquoise | WAS/WASL interacting protein family member 1(WIPF1)                                     | Homo sapiens |
| 3662 | 11749761_a_at | turquoise | PC-esterase domain containing 1A(PCED1A)                                                | Homo sapiens |
| 3663 | 11749773_x_at | turquoise | guanylate binding protein 1(GBP1)                                                       | Homo sapiens |
| 3664 | 11749786_x_at | turquoise | heterogeneous nuclear ribonucleoprotein F(HNRNPF)                                       | Homo sapiens |
| 3665 | 11749788_x_at | turquoise | L-2-hydroxyglutarate dehydrogenase(L2HGDH)                                              | Homo sapiens |
| 3666 | 11749790_a_at | turquoise | caspase 8(CASP8)                                                                        | Homo sapiens |
| 3667 | 11749792_a_at | turquoise | PBX homeobox 1(PBX1)                                                                    | Homo sapiens |
| 3668 | 11749793_a_at | turquoise | annexin A4(ANXA4)                                                                       | Homo sapiens |
| 3669 | 11749794_x_at | turquoise | annexin A4(ANXA4)                                                                       | Homo sapiens |
| 3670 | 11749827_a_at | turquoise | cytochrome b-245 beta chain(CYBB)                                                       | Homo sapiens |
| 3671 | 11749833_s_at | turquoise | angiotensinogen(AGT)                                                                    | Homo sapiens |
| 3672 | 11749844_x_at | turquoise | colony stimulating factor 2 receptor alpha subunit(CSF2RA)                              | Homo sapiens |
| 3673 | 11749862_a_at | turquoise | apolipoprotein L3(APOL3)                                                                | Homo sapiens |
| 3674 | 11749879_a_at | turquoise | post-GPI attachment to proteins 2(PGAP2)                                                | Homo sapiens |
| 3675 | 11749880_x_at | turquoise | post-GPI attachment to proteins 2(PGAP2)                                                | Homo sapiens |
| 3676 | 11749893_a_at | turquoise | carbonic anhydrase 14(CA14)                                                             | Homo sapiens |
| 3677 | 11749894_a_at | turquoise | deoxycytidine kinase(DCK)                                                               | Homo sapiens |
| 3679 | 11749917_a_at | turquoise | hes related family bHLH transcription factor with YRPW motif 2(HEY2)                    | Homo sapiens |
| 3680 | 11749924_a_at | turquoise | mitochondrial ribosomal protein S25(MRPS25)                                             | Homo sapiens |
| 3681 | 11749935_s_at | turquoise | tropomyosin 3(TPM3)                                                                     | Homo sapiens |
| 3682 | 11749978_a_at | turquoise | major vault protein(MVP)                                                                | Homo sapiens |

|      |               |           |                                                                                    |              |
|------|---------------|-----------|------------------------------------------------------------------------------------|--------------|
| 3683 | 11749990_x_at | turquoise | major histocompatibility complex, class I, A(HLA-A)                                | Homo sapiens |
| 3684 | 11750000_a_at | turquoise | C-type lectin domain family 7 member A(CLEC7A)                                     | Homo sapiens |
| 3685 | 11750001_x_at | turquoise | C-type lectin domain family 7 member A(CLEC7A)                                     | Homo sapiens |
| 3689 | 11750045_x_at | turquoise | tropomyosin 3(TPM3)                                                                | Homo sapiens |
| 3691 | 11750080_a_at | turquoise | damage specific DNA binding protein 2(DDB2)                                        | Homo sapiens |
| 3693 | 11750107_a_at | turquoise | SEL1L family member 3(SEL1L3)                                                      | Homo sapiens |
| 3694 | 11750111_a_at | turquoise | vinculin(VCL)                                                                      | Homo sapiens |
| 3696 | 11750143_a_at | turquoise | phosphatidylinositol glycan anchor biosynthesis class Z(PIGZ)                      | Homo sapiens |
| 3697 | 11750146_a_at | turquoise | transketolase like 1(TKTL1)                                                        | Homo sapiens |
| 3698 | 11750159_a_at | turquoise | basic leucine zipper ATF-like transcription factor 2(BATF2)                        | Homo sapiens |
| 3699 | 11750170_a_at | turquoise | tripartite motif containing 22(TRIM22)                                             | Homo sapiens |
| 3700 | 11750171_a_at | turquoise | transducin like enhancer of split 2(TLE2)                                          | Homo sapiens |
| 3701 | 11750178_a_at | turquoise | enoyl-CoA hydratase domain containing 2(ECHDC2)                                    | Homo sapiens |
| 3702 | 11750179_s_at | turquoise | enoyl-CoA hydratase domain containing 2(ECHDC2)                                    | Homo sapiens |
| 3703 | 11750185_a_at | turquoise | coiled-coil domain containing 71-like(CCDC71L)                                     | Homo sapiens |
| 3704 | 11750189_s_at | turquoise | CD44 molecule (Indian blood group)(CD44)                                           | Homo sapiens |
| 3705 | 11750190_x_at | turquoise | CD44 molecule (Indian blood group)(CD44)                                           | Homo sapiens |
| 3706 | 11750196_a_at | turquoise | annexin A4(ANXA4)                                                                  | Homo sapiens |
| 3707 | 11750198_a_at | turquoise | caspase 7(CASP7)                                                                   | Homo sapiens |
| 3708 | 11750199_a_at | turquoise | hematopoietic cell-specific Lyn substrate 1(HCLS1)                                 | Homo sapiens |
| 3711 | 11750250_a_at | turquoise | protein phosphatase 1 regulatory subunit 13 like(PPP1R13L)                         | Homo sapiens |
| 3712 | 11750267_x_at | turquoise | inositol polyphosphate-5-phosphatase J(INPP5J)                                     | Homo sapiens |
| 3713 | 11750282_x_at | turquoise | microRNA 6837(MIR6837)                                                             | Homo sapiens |
| 3714 | 11750284_a_at | turquoise | lines homolog 1(LINS1)                                                             | Homo sapiens |
| 3716 | 11750301_x_at | turquoise | family with sequence similarity 92 member A(FAM92A)                                | Homo sapiens |
| 3717 | 11750334_a_at | turquoise | REL proto-oncogene, NF-kB subunit(REL)                                             | Homo sapiens |
| 3718 | 11750359_x_at | turquoise | small nucleolar RNA, H/ACA box 67(SNORA67)                                         | Homo sapiens |
| 3719 | 11750374_a_at | turquoise | Rap guanine nucleotide exchange factor 6(RAPGEF6)                                  | Homo sapiens |
| 3720 | 11750376_a_at | turquoise | potassium calcium-activated channel subfamily M alpha 1(KCNMA1)                    | Homo sapiens |
| 3721 | 11750408_a_at | turquoise | adhesion G protein-coupled receptor E5(ADGRE5)                                     | Homo sapiens |
| 3722 | 11750453_s_at | turquoise | parkin RBR E3 ubiquitin protein ligase(PARK2)                                      | Homo sapiens |
| 3723 | 11750454_a_at | turquoise | ETS variant 7(ETV7)                                                                | Homo sapiens |
| 3724 | 11750455_x_at | turquoise | ETS variant 7(ETV7)                                                                | Homo sapiens |
| 3725 | 11750527_s_at | turquoise | major histocompatibility complex, class II, DQ alpha 1(HLA-DQA1)                   | Homo sapiens |
| 3726 | 11750528_x_at | turquoise | major histocompatibility complex, class II, DQ alpha 1(HLA-DQA1)                   | Homo sapiens |
| 3727 | 11750531_a_at | turquoise | PYD and CARD domain containing(PYCARD)                                             | Homo sapiens |
| 3728 | 11750551_a_at | turquoise | serine/threonine kinase 4(STK4)                                                    | Homo sapiens |
| 3729 | 11750552_s_at | turquoise | caspase recruitment domain family member 16(CARD16)                                | Homo sapiens |
| 3730 | 11750553_x_at | turquoise | caspase 1(CASP1)                                                                   | Homo sapiens |
| 3731 | 11750575_a_at | turquoise | zinc finger protein, FOG family member 2(ZFPM2)                                    | Homo sapiens |
| 3732 | 11750585_a_at | turquoise | septin 9(SEPT9)                                                                    | Homo sapiens |
| 3734 | 11750598_s_at | turquoise | TPX2, microtubule nucleation factor(TPX2)                                          | Homo sapiens |
| 3735 | 11750629_a_at | turquoise | C1q and tumor necrosis factor related protein 8(C1QTNF8)                           | Homo sapiens |
| 3736 | 11750636_a_at | turquoise | acetyl-CoA carboxylase beta(ACACB)                                                 | Homo sapiens |
| 3737 | 11750674_a_at | turquoise | signal transducer and activator of transcription 3(STAT3)                          | Homo sapiens |
| 3738 | 11750677_a_at | turquoise | family with sequence similarity 65 member C(FAM65C)                                | Homo sapiens |
| 3739 | 11750687_a_at | turquoise | ADAM metalloproteinase domain 28(ADAM28)                                           | Homo sapiens |
| 3740 | 11750704_a_at | turquoise | sex comb on midleg homolog 1 (Drosophila)(SCMH1)                                   | Homo sapiens |
| 3741 | 11750723_x_at | turquoise | MHC class I polypeptide-related sequence B(MICB)                                   | Homo sapiens |
| 3742 | 11750740_a_at | turquoise | ST3 beta-galactoside alpha-2,3-sialyltransferase 5(ST3GAL5)                        | Homo sapiens |
| 3743 | 11750766_a_at | turquoise | transforming acidic coiled-coil containing protein 2(TACC2)                        | Homo sapiens |
| 3744 | 11750769_s_at | turquoise | C-C motif chemokine receptor 2(CCR2)                                               | Homo sapiens |
| 3745 | 11750773_a_at | turquoise | kinesin family member 2A(KIF2A)                                                    | Homo sapiens |
| 3746 | 11750778_a_at | turquoise | macrophage scavenger receptor 1(MSR1)                                              | Homo sapiens |
| 3747 | 11750800_a_at | turquoise | ligand of numb-protein X 1(LNX1)                                                   | Homo sapiens |
| 3748 | 11750811_x_at | turquoise | eomesodermin(EOMES)                                                                | Homo sapiens |
| 3749 | 11750812_a_at | turquoise | Fli-1 proto-oncogene, ETS transcription factor(FLI1)                               | Homo sapiens |
| 3750 | 11750815_s_at | turquoise | microRNA 3064(MIR3064)                                                             | Homo sapiens |
| 3751 | 11750816_a_at | turquoise | CD96 molecule(CD96)                                                                | Homo sapiens |
| 3752 | 11750821_x_at | turquoise | mirror-image polydactyly 1(MIPOL1)                                                 | Homo sapiens |
| 3753 | 11750826_x_at | turquoise | ADAM like decysin 1(ADAMDEC1)                                                      | Homo sapiens |
| 3754 | 11750847_a_at | turquoise | ankyrin repeat domain 44(ANKRD44)                                                  | Homo sapiens |
| 3755 | 11750856_s_at | turquoise | C-C motif chemokine receptor 2(CCR2)                                               | Homo sapiens |
| 3756 | 11750860_a_at | turquoise | cytidine monophospho-N-acetylneuraminic acid hydroxylase, pseudogene(CMAHP)        | Homo sapiens |
| 3757 | 11750861_x_at | turquoise | cytidine monophospho-N-acetylneuraminic acid hydroxylase, pseudogene(CMAHP)        | Homo sapiens |
| 3758 | 11750894_a_at | turquoise | T-box 5(TBX5)                                                                      | Homo sapiens |
| 3760 | 11750932_a_at | turquoise | epoxide hydrolase 2(EPHX2)                                                         | Homo sapiens |
| 3761 | 11750984_a_at | turquoise | mannosyl (alpha-1,6-) glycoprotein beta-1,2-N-acetylglucosaminyltransferase(MGAT2) | Homo sapiens |
| 3763 | 11751013_a_at | turquoise | glycine receptor beta(GLRB)                                                        | Homo sapiens |
| 3764 | 11751031_a_at | turquoise | c-src tyrosine kinase(CSK)                                                         | Homo sapiens |
| 3765 | 11751084_s_at | turquoise | plexin D1(PLXND1)                                                                  | Homo sapiens |
| 3766 | 11751096_a_at | turquoise | sorting nexin 10(SNX10)                                                            | Homo sapiens |
| 3767 | 11751097_x_at | turquoise | sorting nexin 10(SNX10)                                                            | Homo sapiens |
| 3768 | 11751105_s_at | turquoise | wolframin ER transmembrane glycoprotein(WFS1)                                      | Homo sapiens |
| 3769 | 11751135_a_at | turquoise | CD86 molecule(CD86)                                                                | Homo sapiens |
| 3770 | 11751141_a_at | turquoise | ARP3 actin related protein 3 homolog(ACTR3)                                        | Homo sapiens |
| 3771 | 11751162_x_at | turquoise | tweety family member 1(TTYH1)                                                      | Homo sapiens |
| 3772 | 11751178_a_at | turquoise | ATPase H+ transporting V1 subunit A(ATP6V1A)                                       | Homo sapiens |
| 3773 | 11751202_a_at | turquoise | chromosome 19 open reading frame 66(C19orf66)                                      | Homo sapiens |
| 3774 | 11751225_s_at | turquoise | colony stimulating factor 2 receptor alpha subunit(CSF2RA)                         | Homo sapiens |
| 3775 | 11751242_s_at | turquoise | Fc fragment of IgG receptor IIa(FCGR2A)                                            | Homo sapiens |
| 3776 | 11751288_a_at | turquoise | lysyl oxidase like 2(LOXL2)                                                        | Homo sapiens |



|      |               |           |                                                                                  |              |
|------|---------------|-----------|----------------------------------------------------------------------------------|--------------|
| 3777 | 11751299_a_at | turquoise | apolipoprotein L2(APOL2)                                                         | Homo sapiens |
| 3778 | 11751304_a_at | turquoise | integrin subunit alpha L(ITGAL)                                                  | Homo sapiens |
| 3780 | 11751318_s_at | turquoise | SEN3-EIF4A1 readthrough (NMD candidate)(SEN3-EIF4A1)                             | Homo sapiens |
| 3781 | 11751319_x_at | turquoise | SEN3-EIF4A1 readthrough (NMD candidate)(SEN3-EIF4A1)                             | Homo sapiens |
| 3782 | 11751332_a_at | turquoise | cytokine receptor like factor 3(CRLF3)                                           | Homo sapiens |
| 3783 | 11751399_x_at | turquoise | NDRG family member 3(NDRG3)                                                      | Homo sapiens |
| 3784 | 11751422_a_at | turquoise | choline dehydrogenase(CHDH)                                                      | Homo sapiens |
| 3785 | 11751424_a_at | turquoise | TRAF3 interacting protein 3(TRAF3IP3)                                            | Homo sapiens |
| 3786 | 11751425_x_at | turquoise | TRAF3 interacting protein 3(TRAF3IP3)                                            | Homo sapiens |
| 3788 | 11751465_a_at | turquoise | growth factor receptor bound protein 14(GRB14)                                   | Homo sapiens |
| 3789 | 11751467_a_at | turquoise | phosphatidylinositol glycan anchor biosynthesis class U(PIGU)                    | Homo sapiens |
| 3790 | 11751482_s_at | turquoise | butyrophilin subfamily 3 member A2(BTN3A2)                                       | Homo sapiens |
| 3791 | 11751501_a_at | turquoise | fatty acid hydroxylase domain containing 2(FAXDC2)                               | Homo sapiens |
| 3792 | 11751511_a_at | turquoise | ETS variant 7(ETV7)                                                              | Homo sapiens |
| 3793 | 11751544_a_at | turquoise | myosin IF(MYO1F)                                                                 | Homo sapiens |
| 3794 | 11751571_x_at | turquoise | sarcoglycan alpha(SGCA)                                                          | Homo sapiens |
| 3796 | 11751596_s_at | turquoise | abl interactor 1(ABI1)                                                           | Homo sapiens |
| 3797 | 11751597_x_at | turquoise | abl interactor 1(ABI1)                                                           | Homo sapiens |
| 3798 | 11751600_a_at | turquoise | dual adaptor of phosphotyrosine and 3-phosphoinositides 1(DAPP1)                 | Homo sapiens |
| 3799 | 11751602_a_at | turquoise | serine and arginine rich splicing factor 7(SRSF7)                                | Homo sapiens |
| 3800 | 11751603_x_at | turquoise | serine and arginine rich splicing factor 7(SRSF7)                                | Homo sapiens |
| 3801 | 11751611_a_at | turquoise | TRAF-type zinc finger domain containing 1(TRAFD1)                                | Homo sapiens |
| 3803 | 11751618_x_at | turquoise | major histocompatibility complex, class I, E(HLA-E)                              | Homo sapiens |
| 3804 | 11751619_a_at | turquoise | apolipoprotein L1(APOL1)                                                         | Homo sapiens |
| 3805 | 11751628_a_at | turquoise | transmembrane protein 140(TMEM140)                                               | Homo sapiens |
| 3806 | 11751641_x_at | turquoise | PHD finger protein 11(PHF11)                                                     | Homo sapiens |
| 3807 | 11751647_a_at | turquoise | interleukin 7 receptor(IL7R)                                                     | Homo sapiens |
| 3808 | 11751651_s_at | turquoise | phospholipid scramblase 1(PLSCR1)                                                | Homo sapiens |
| 3809 | 11751652_x_at | turquoise | phospholipid scramblase 1(PLSCR1)                                                | Homo sapiens |
| 3811 | 11751688_a_at | turquoise | glycoprotein integral membrane 1(GINM1)                                          | Homo sapiens |
| 3812 | 11751690_x_at | turquoise | putative aquaporin-7-like protein 3(LOC100509620)                                | Homo sapiens |
| 3814 | 11751713_a_at | turquoise | chromosome 6 open reading frame 62(C6orf62)                                      | Homo sapiens |
| 3815 | 11751724_a_at | turquoise | zinc finger protein 542, pseudogene(ZNF542P)                                     | Homo sapiens |
| 3817 | 11751765_a_at | turquoise | ribonucleoprotein, PTB binding 2(RAVER2)                                         | Homo sapiens |
| 3818 | 11751766_a_at | turquoise | enoyl-CoA hydratase domain containing 2(ECHDC2)                                  | Homo sapiens |
| 3819 | 11751768_a_at | turquoise | sorting nexin 19(SNX19)                                                          | Homo sapiens |
| 3822 | 11751782_a_at | turquoise | EF-hand domain containing 2(EFHC2)                                               | Homo sapiens |
| 3823 | 11751799_a_at | turquoise | peroxiredoxin 6(PRX6)                                                            | Homo sapiens |
| 3824 | 11751805_a_at | turquoise | thymidylate synthetase(TYMS)                                                     | Homo sapiens |
| 3825 | 11751821_a_at | turquoise | cytochrome b-245 beta chain(CYBB)                                                | Homo sapiens |
| 3826 | 11751833_a_at | turquoise | butyrylcholinesterase(BCHE)                                                      | Homo sapiens |
| 3827 | 11751857_a_at | turquoise | granulysin(GNLY)                                                                 | Homo sapiens |
| 3829 | 11751888_x_at | turquoise | collagen type IV alpha 6 chain(COL4A6)                                           | Homo sapiens |
| 3830 | 11751890_a_at | turquoise | sodium voltage-gated channel alpha subunit 5(SCN5A)                              | Homo sapiens |
| 3831 | 11751893_a_at | turquoise | collagen type IV alpha 6 chain(COL4A6)                                           | Homo sapiens |
| 3832 | 11751917_a_at | turquoise | myotubularin related protein 12(TMTR12)                                          | Homo sapiens |
| 3833 | 11751921_s_at | turquoise | aryl hydrocarbon receptor(AHR)                                                   | Homo sapiens |
| 3834 | 11752003_a_at | turquoise | IQ motif containing GTPase activating protein 1(IQGAP1)                          | Homo sapiens |
| 3835 | 11752009_a_at | turquoise | tenascin C(TNC)                                                                  | Homo sapiens |
| 3836 | 11752036_s_at | turquoise | transmembrane protein 123(TMEM123)                                               | Homo sapiens |
| 3837 | 11752051_a_at | turquoise | myosin heavy chain 9(MYH9)                                                       | Homo sapiens |
| 3838 | 11752052_x_at | turquoise | myosin heavy chain 9(MYH9)                                                       | Homo sapiens |
| 3839 | 11752065_a_at | turquoise | CD6 molecule(CD6)                                                                | Homo sapiens |
| 3840 | 11752095_a_at | turquoise | protein tyrosine phosphatase, receptor type C(PTPRC)                             | Homo sapiens |
| 3841 | 11752142_a_at | turquoise | filamin A(FLNA)                                                                  | Homo sapiens |
| 3842 | 11752149_a_at | turquoise | ubiquitin associated and SH3 domain containing A(UBASH3A)                        | Homo sapiens |
| 3843 | 11752153_a_at | turquoise | neurobeachin like 2(NBEAL2)                                                      | Homo sapiens |
| 3844 | 11752154_x_at | turquoise | neurobeachin like 2(NBEAL2)                                                      | Homo sapiens |
| 3845 | 11752163_a_at | turquoise | lysine demethylase 2B(KDM2B)                                                     | Homo sapiens |
| 3846 | 11752164_x_at | turquoise | lysine demethylase 2B(KDM2B)                                                     | Homo sapiens |
| 3847 | 11752171_s_at | turquoise | serine palmitoyltransferase long chain base subunit 1(SPTLC1)                    | Homo sapiens |
| 3848 | 11752173_a_at | turquoise | transmembrane protein 2(TMEM2)                                                   | Homo sapiens |
| 3849 | 11752175_x_at | turquoise | DBF4 zinc finger(DBF4)                                                           | Homo sapiens |
| 3850 | 11752180_x_at | turquoise | von Hippel-Lindau tumor suppressor(VHL)                                          | Homo sapiens |
| 3851 | 11752224_a_at | turquoise | schlafen family member 5(SLFN5)                                                  | Homo sapiens |
| 3852 | 11752233_a_at | turquoise | copine 4(CPNE4)                                                                  | Homo sapiens |
| 3853 | 11752235_x_at | turquoise | inhibitor of kappa light polypeptide gene enhancer in B-cells, kinase beta(IKKB) | Homo sapiens |
| 3854 | 11752265_a_at | turquoise | androgen receptor(AR)                                                            | Homo sapiens |
| 3855 | 11752267_a_at | turquoise | ribosomal protein S6 kinase A4(RPS6KA4)                                          | Homo sapiens |
| 3856 | 11752273_a_at | turquoise | colony stimulating factor 1 receptor(CSF1R)                                      | Homo sapiens |
| 3857 | 11752278_x_at | turquoise | poly(A) binding protein cytoplasmic 1(PABPC1)                                    | Homo sapiens |
| 3858 | 11752297_x_at | turquoise | class II major histocompatibility complex transactivator(CIITA)                  | Homo sapiens |
| 3859 | 11752318_a_at | turquoise | butyrophilin subfamily 3 member A3(BTN3A3)                                       | Homo sapiens |
| 3860 | 11752331_s_at | turquoise | SLX1A-SULT1A3 readthrough (NMD candidate)(SLX1A-SULT1A3)                         | Homo sapiens |
| 3861 | 11752341_a_at | turquoise | coagulation factor VIII(F8)                                                      | Homo sapiens |
| 3862 | 11752379_a_at | turquoise | multiple C2 and transmembrane domain containing 1(MCTP1)                         | Homo sapiens |
| 3863 | 11752387_a_at | turquoise | ETS proto-oncogene 1, transcription factor(ETS1)                                 | Homo sapiens |
| 3864 | 11752398_a_at | turquoise | chromosome 1 open reading frame 228(C1orf228)                                    | Homo sapiens |
| 3865 | 11752411_a_at | turquoise | coiled-coil domain containing 8(CCDC8)                                           | Homo sapiens |
| 3866 | 11752467_s_at | turquoise | inositol polyphosphate-5-phosphatase D(INPP5D)                                   | Homo sapiens |
| 3867 | 11752482_a_at | turquoise | fibrillin 2(FBN2)                                                                | Homo sapiens |
| 3868 | 11752535_a_at | turquoise | cyclin L1(CCNL1)                                                                 | Homo sapiens |

|      |               |           |                                                                      |              |
|------|---------------|-----------|----------------------------------------------------------------------|--------------|
| 3869 | 11752568_a_at | turquoise | LCK proto-oncogene, Src family tyrosine kinase(LCK)                  | Homo sapiens |
| 3870 | 11752569_x_at | turquoise | LCK proto-oncogene, Src family tyrosine kinase(LCK)                  | Homo sapiens |
| 3871 | 11752606_x_at | turquoise | microRNA 6845(MIR6845)                                               | Homo sapiens |
| 3872 | 11752607_a_at | turquoise | microRNA 6132(MIR6132)                                               | Homo sapiens |
| 3873 | 11752608_x_at | turquoise | microRNA 6132(MIR6132)                                               | Homo sapiens |
| 3874 | 11752610_a_at | turquoise | thymocyte selection associated family member 2(THEMIS2)              | Homo sapiens |
| 3875 | 11752611_s_at | turquoise | signal sequence receptor subunit 1(SSR1)                             | Homo sapiens |
| 3876 | 11752631_a_at | turquoise | SAM and SH3 domain containing 3(SASH3)                               | Homo sapiens |
| 3877 | 11752635_x_at | turquoise | potassium voltage-gated channel subfamily H member 2(KCNH2)          | Homo sapiens |
| 3878 | 11752644_a_at | turquoise | TIA1 cytotoxic granule associated RNA binding protein like 1(TIAL1)  | Homo sapiens |
| 3880 | 11752697_a_at | turquoise | PC-esterase domain containing 1A(PCED1A)                             | Homo sapiens |
| 3881 | 11752698_x_at | turquoise | PC-esterase domain containing 1A(PCED1A)                             | Homo sapiens |
| 3882 | 11752723_a_at | turquoise | CD200 receptor 1(CD200R1)                                            | Homo sapiens |
| 3883 | 11752732_x_at | turquoise | dihydrouridine synthase 4 like(DUS4L)                                | Homo sapiens |
| 3884 | 11752737_a_at | turquoise | C-type lectin domain family 7 member A(CLEC7A)                       | Homo sapiens |
| 3887 | 11752769_a_at | turquoise | piggyBac transposable element derived 5(PGBD5)                       | Homo sapiens |
| 3888 | 11752771_a_at | turquoise | carbohydrate sulfotransferase 15(CHST15)                             | Homo sapiens |
| 3889 | 11752794_a_at | turquoise | signal transducer and activator of transcription 2(STAT2)            | Homo sapiens |
| 3890 | 11752795_x_at | turquoise | signal transducer and activator of transcription 2(STAT2)            | Homo sapiens |
| 3891 | 11752796_x_at | turquoise | chromosome 3 open reading frame 33(C3orf33)                          | Homo sapiens |
| 3892 | 11752801_a_at | turquoise | SP110 nuclear body protein(SP110)                                    | Homo sapiens |
| 3893 | 11752802_x_at | turquoise | SP110 nuclear body protein(SP110)                                    | Homo sapiens |
| 3894 | 11752812_x_at | turquoise | tweety family member 1(TTYH1)                                        | Homo sapiens |
| 3895 | 11752814_s_at | turquoise | TNF receptor superfamily member 1A(TNFRSF1A)                         | Homo sapiens |
| 3896 | 11752817_s_at | turquoise | tripeptidyl peptidase 1(TPP1)                                        | Homo sapiens |
| 3897 | 11752833_x_at | turquoise | post-GPI attachment to proteins 2(PGAP2)                             | Homo sapiens |
| 3898 | 11752865_x_at | turquoise | actin beta(ACTB)                                                     | Homo sapiens |
| 3899 | 11752873_a_at | turquoise | src kinase associated phosphoprotein 1(SKAP1)                        | Homo sapiens |
| 3900 | 11752877_x_at | turquoise | tubulin beta class I(TUBB)                                           | Homo sapiens |
| 3901 | 11752890_a_at | turquoise | syntrophin alpha 1(SNTA1)                                            | Homo sapiens |
| 3902 | 11752898_a_at | turquoise | peptidylprolyl isomerase like 6(PPIL6)                               | Homo sapiens |
| 3903 | 11752910_a_at | turquoise | ADP ribosylation factor like GTPase 6 interacting protein 1(ARL6IP1) | Homo sapiens |
| 3905 | 11752918_a_at | turquoise | Fc receptor like 6(FCRL6)                                            | Homo sapiens |
| 3907 | 11752930_a_at | turquoise | guanylate binding protein 1(GBP1)                                    | Homo sapiens |
| 3908 | 11752931_x_at | turquoise | guanylate binding protein 1(GBP1)                                    | Homo sapiens |
| 3909 | 11752948_a_at | turquoise | prolylcarboxypeptidase(PRPC)                                         | Homo sapiens |
| 3910 | 11752959_x_at | turquoise | actin beta(ACTB)                                                     | Homo sapiens |
| 3912 | 11752987_a_at | turquoise | EPN2 intronic transcript 1(EPN2-IT1)                                 | Homo sapiens |
| 3913 | 11753025_a_at | turquoise | TNF receptor superfamily member 1B(TNFRSF1B)                         | Homo sapiens |
| 3914 | 11753034_a_at | turquoise | zinc finger NFX1-type containing 1(ZNFX1)                            | Homo sapiens |
| 3915 | 11753055_s_at | turquoise | RAP1B, member of RAS oncogene family(RAP1B)                          | Homo sapiens |
| 3916 | 11753056_a_at | turquoise | zinc finger protein 667(ZNF667)                                      | Homo sapiens |
| 3917 | 11753061_a_at | turquoise | schlafen family member 5(SLFN5)                                      | Homo sapiens |
| 3918 | 11753088_a_at | turquoise | multiple C2 and transmembrane domain containing 1(MCTP1)             | Homo sapiens |
| 3919 | 11753090_x_at | turquoise | opioid growth factor receptor(OGFR)                                  | Homo sapiens |
| 3920 | 11753106_a_at | turquoise | target of myb1 like 2 membrane trafficking protein(TOM1L2)           | Homo sapiens |
| 3921 | 11753111_x_at | turquoise | interleukin 10 receptor subunit beta(IL10RB)                         | Homo sapiens |
| 3922 | 11753129_a_at | turquoise | transmembrane 4 L six family member 1(TM4SF1)                        | Homo sapiens |
| 3923 | 11753132_x_at | turquoise | solute carrier family 50 member 1(SLC50A1)                           | Homo sapiens |
| 3924 | 11753151_a_at | turquoise | histone deacetylase 8(HDAC8)                                         | Homo sapiens |
| 3925 | 11753165_a_at | turquoise | RAB27A, member RAS oncogene family(RAB27A)                           | Homo sapiens |
| 3926 | 11753213_x_at | turquoise | G protein subunit alpha i2(GNAI2)                                    | Homo sapiens |
| 3927 | 11753219_a_at | turquoise | killer cell lectin like receptor F1(KLRF1)                           | Homo sapiens |
| 3928 | 11753239_a_at | turquoise | scavenger receptor class A member 5(SCARA5)                          | Homo sapiens |
| 3929 | 11753241_s_at | turquoise | C-type lectin domain family 12 member A(CLEC12A)                     | Homo sapiens |
| 3930 | 11753266_a_at | turquoise | transcription elongation factor A3(TCEA3)                            | Homo sapiens |
| 3931 | 11753291_a_at | turquoise | CD44 molecule (indian blood group)(CD44)                             | Homo sapiens |
| 3932 | 11753292_x_at | turquoise | CD44 molecule (indian blood group)(CD44)                             | Homo sapiens |
| 3933 | 11753312_a_at | turquoise | DnaJ heat shock protein family (Hsp40) member C5 gamma(DNAJC5G)      | Homo sapiens |
| 3934 | 11753321_a_at | turquoise | TNFSF12-TNFSF13 readthrough(TNFSF12-TNFSF13)                         | Homo sapiens |
| 3936 | 11753334_x_at | turquoise | BCL2 associated athanogene 1(BAG1)                                   | Homo sapiens |
| 3937 | 11753335_a_at | turquoise | transmembrane protein 177(TMEM177)                                   | Homo sapiens |
| 3939 | 11753348_a_at | turquoise | SAM domain, SH3 domain and nuclear localization signals 1(SAMSN1)    | Homo sapiens |
| 3940 | 11753399_x_at | turquoise | annexin A2(ANXA2)                                                    | Homo sapiens |
| 3941 | 11753404_x_at | turquoise | major histocompatibility complex, class I, E(HLA-E)                  | Homo sapiens |
| 3942 | 11753445_a_at | turquoise | heme oxygenase 1(HMOX1)                                              | Homo sapiens |
| 3943 | 11753446_x_at | turquoise | heme oxygenase 1(HMOX1)                                              | Homo sapiens |
| 3946 | 11753484_x_at | turquoise | killer cell lectin like receptor D1(KLDR1)                           | Homo sapiens |
| 3948 | 11753515_a_at | turquoise | interleukin 32(IL32)                                                 | Homo sapiens |
| 3949 | 11753519_a_at | turquoise | gamma-secretase activating protein(GSAP)                             | Homo sapiens |
| 3950 | 11753521_a_at | turquoise | RAB5C, member RAS oncogene family(RAB5C)                             | Homo sapiens |
| 3951 | 11753534_a_at | turquoise | killer cell lectin like receptor D1(KLDR1)                           | Homo sapiens |
| 3952 | 11753535_x_at | turquoise | killer cell lectin like receptor D1(KLDR1)                           | Homo sapiens |
| 3953 | 11753549_a_at | turquoise | CKLF like MARVEL transmembrane domain containing 3(CMTM3)            | Homo sapiens |
| 3954 | 11753555_a_at | turquoise | CD53 molecule(CD53)                                                  | Homo sapiens |
| 3955 | 11753569_a_at | turquoise | leucine zipper tumor suppressor 1(LZTS1)                             | Homo sapiens |
| 3956 | 11753575_s_at | turquoise | coenzyme Q7, hydroxylase(COQ7)                                       | Homo sapiens |
| 3957 | 11753623_s_at | turquoise | RAP1B, member of RAS oncogene family(RAP1B)                          | Homo sapiens |
| 3959 | 11753675_x_at | turquoise | profilin 2(PFN2)                                                     | Homo sapiens |
| 3960 | 11753722_x_at | turquoise | profilin 1(PFN1)                                                     | Homo sapiens |
| 3961 | 11753727_x_at | turquoise | microRNA 6805(MIR6805)                                               | Homo sapiens |
| 3962 | 11753732_a_at | turquoise | polyamine oxidase(PAOX)                                              | Homo sapiens |

|      |               |           |                                                                         |              |
|------|---------------|-----------|-------------------------------------------------------------------------|--------------|
| 3963 | 11753735_x_at | turquoise | thymosin beta 4, X-linked(TMSB4X)                                       | Homo sapiens |
| 3965 | 11753776_x_at | turquoise | leukocyte associated immunoglobulin like receptor 2(LAIR2)              | Homo sapiens |
| 3969 | 11753810_a_at | turquoise | C-C motif chemokine ligand 5(CCL5)                                      | Homo sapiens |
| 3973 | 11753856_a_at | turquoise | CDC28 protein kinase regulatory subunit 2(CKS2)                         | Homo sapiens |
| 3974 | 11753858_a_at | turquoise | small nucleolar RNA, H/ACA box 44(SNORA44)                              | Homo sapiens |
| 3975 | 11753859_x_at | turquoise | small nucleolar RNA, H/ACA box 44(SNORA44)                              | Homo sapiens |
| 3976 | 11753868_x_at | turquoise | leukocyte specific transcript 1(LST1)                                   | Homo sapiens |
| 3979 | 11753882_a_at | turquoise | interleukin 2 receptor subunit gamma(IL2RG)                             | Homo sapiens |
| 3980 | 11753883_x_at | turquoise | interleukin 2 receptor subunit gamma(IL2RG)                             | Homo sapiens |
| 3982 | 11753898_x_at | turquoise | major histocompatibility complex, class II, DQ alpha 1(HLA-DQA1)        | Homo sapiens |
| 3983 | 11753902_a_at | turquoise | actinin alpha 4(ACTN4)                                                  | Homo sapiens |
| 3984 | 11753911_s_at | turquoise | transmembrane protein 242(TMEM242)                                      | Homo sapiens |
| 3985 | 11753915_a_at | turquoise | SEL1L family member 3(SEL1L3)                                           | Homo sapiens |
| 3986 | 11753918_a_at | turquoise | nucleoporin 85(NUP85)                                                   | Homo sapiens |
| 3987 | 11753920_a_at | turquoise | apolipoprotein L1(APOL1)                                                | Homo sapiens |
| 3988 | 11753923_at   | turquoise | MBNL1 antisense RNA 1(MBNL1-AS1)                                        | Homo sapiens |
| 3989 | 11753929_x_at | turquoise | ST3 beta-galactoside alpha-2,3-sialyltransferase 2(ST3GAL2)             | Homo sapiens |
| 3990 | 11753936_x_at | turquoise | transient receptor potential cation channel subfamily M member 2(TRPM2) | Homo sapiens |
| 3991 | 11753939_x_at | turquoise | proteasome subunit beta 10(PSMB10)                                      | Homo sapiens |
| 3992 | 11753988_a_at | turquoise | sprouty RTK signaling antagonist 2(SPRY2)                               | Homo sapiens |
| 4001 | 11754035_a_at | turquoise | interferon regulatory factor 1(IRF1)                                    | Homo sapiens |
| 4002 | 11754064_x_at | turquoise | annexin A2(ANXA2)                                                       | Homo sapiens |
| 4003 | 11754071_x_at | turquoise | transgelin 2(TAGLN2)                                                    | Homo sapiens |
| 4004 | 11754105_x_at | turquoise | small nuclear ribonucleoprotein polypeptides B and B1(SNRPB)            | Homo sapiens |
| 4005 | 11754124_a_at | turquoise | coactosin like F-actin binding protein 1(COTL1)                         | Homo sapiens |
| 4006 | 11754125_x_at | turquoise | coactosin like F-actin binding protein 1(COTL1)                         | Homo sapiens |
| 4007 | 11754142_x_at | turquoise | microRNA 1244-1(MIR1244-1)                                              | Homo sapiens |
| 4009 | 11754153_x_at | turquoise | caspase 8(CASP8)                                                        | Homo sapiens |
| 4011 | 11754170_a_at | turquoise | transforming growth factor beta regulator 1(TBRG1)                      | Homo sapiens |
| 4012 | 11754181_a_at | turquoise | interleukin 2 receptor subunit gamma(IL2RG)                             | Homo sapiens |
| 4013 | 11754182_x_at | turquoise | interleukin 2 receptor subunit gamma(IL2RG)                             | Homo sapiens |
| 4014 | 11754202_a_at | turquoise | capping actin protein, gelsolin like(CAPG)                              | Homo sapiens |
| 4015 | 11754204_a_at | turquoise | peroxisomal biogenesis factor 11 alpha(PEX11A)                          | Homo sapiens |
| 4016 | 11754205_a_at | turquoise | lysine acetyltransferase 6B(KAT6B)                                      | Homo sapiens |
| 4017 | 11754217_x_at | turquoise | actin beta(ACTB)                                                        | Homo sapiens |
| 4018 | 11754219_a_at | turquoise | signal induced proliferation associated 1 like 1(SIPA1L1)               | Homo sapiens |
| 4019 | 11754223_at   | turquoise | transmembrane protein 35B(TMEM35B)                                      | Homo sapiens |
| 4020 | 11754224_x_at | turquoise | RAS p21 protein activator 4B(RASA4B)                                    | Homo sapiens |
| 4021 | 11754225_a_at | turquoise | Sec23 homolog B, coat complex II component(SEC23B)                      | Homo sapiens |
| 4022 | 11754243_a_at | turquoise | H2A histone family member X(H2AFX)                                      | Homo sapiens |
| 4023 | 11754246_x_at | turquoise | poly(A) binding protein cytoplasmic 1(PABPC1)                           | Homo sapiens |
| 4024 | 11754258_a_at | turquoise | lipoic acid synthetase(LIAS)                                            | Homo sapiens |
| 4025 | 11754266_s_at | turquoise | E2F transcription factor 3(E2F3)                                        | Homo sapiens |
| 4026 | 11754270_a_at | turquoise | complement component 4B (Chido blood group), copy 2(C4B_2)              | Homo sapiens |
| 4028 | 11754278_x_at | turquoise | cyclin G associated kinase(GAK)                                         | Homo sapiens |
| 4029 | 11754295_a_at | turquoise | family with sequence similarity 107 member B(FAM107B)                   | Homo sapiens |
| 4030 | 11754297_s_at | turquoise | TNF receptor superfamily member 1A(TNFRSF1A)                            | Homo sapiens |
| 4031 | 11754298_x_at | turquoise | casein kinase 1 delta(CSNK1D)                                           | Homo sapiens |
| 4032 | 11754313_s_at | turquoise | ADP ribosylation factor like GTPase 4C(ARL4C)                           | Homo sapiens |
| 4033 | 11754315_x_at | turquoise | thymosin beta 4, X-linked(TMSB4X)                                       | Homo sapiens |
| 4034 | 11754317_a_at | turquoise | annexin A4(ANXA4)                                                       | Homo sapiens |
| 4035 | 11754320_a_at | turquoise | structural maintenance of chromosomes 4(SMC4)                           | Homo sapiens |
| 4036 | 11754321_x_at | turquoise | solute carrier family 12 member 9(SLC12A9)                              | Homo sapiens |
| 4037 | 11754330_a_at | turquoise | interferon regulatory factor 2(IRF2)                                    | Homo sapiens |
| 4038 | 11754339_a_at | turquoise | NAD synthetase 1(NADSYN1)                                               | Homo sapiens |
| 4039 | 11754348_s_at | turquoise | kelch domain containing 4(KLHDC4)                                       | Homo sapiens |
| 4040 | 11754351_a_at | turquoise | cytohesin 1(CYTH1)                                                      | Homo sapiens |
| 4041 | 11754352_a_at | turquoise | ring finger protein 213(RNF213)                                         | Homo sapiens |
| 4042 | 11754358_x_at | turquoise | small nucleolar RNA host gene 4(SNHG4)                                  | Homo sapiens |
| 4043 | 11754360_a_at | turquoise | ribonucleotide reductase regulatory subunit M2(RRM2)                    | Homo sapiens |
| 4044 | 11754370_x_at | turquoise | synaptotagmin like 1(SYTL1)                                             | Homo sapiens |
| 4045 | 11754375_s_at | turquoise | sorting nexin 10(SNX10)                                                 | Homo sapiens |
| 4046 | 11754379_at   | turquoise | poly(ADP-ribose) polymerase family member 9(PARP9)                      | Homo sapiens |
| 4048 | 11754382_a_at | turquoise | small integral membrane protein 5(SMIM5)                                | Homo sapiens |
| 4049 | 11754403_x_at | turquoise | poly(ADP-ribose) polymerase family member 14(PARP14)                    | Homo sapiens |
| 4050 | 11754404_a_at | turquoise | poly(ADP-ribose) polymerase family member 14(PARP14)                    | Homo sapiens |
| 4051 | 11754419_a_at | turquoise | nucleolus and neural progenitor protein(NEPRO)                          | Homo sapiens |
| 4052 | 11754434_a_at | turquoise | cyclin D3(CCND3)                                                        | Homo sapiens |
| 4054 | 11754454_s_at | turquoise | LDL receptor related protein 10(LRP10)                                  | Homo sapiens |
| 4055 | 11754461_s_at | turquoise | uncoupling protein 2(UCP2)                                              | Homo sapiens |
| 4056 | 11754471_a_at | turquoise | major histocompatibility complex, class II, DM beta(HLA-DMB)            | Homo sapiens |
| 4057 | 11754474_a_at | turquoise | pleckstrin(PLCK)                                                        | Homo sapiens |
| 4058 | 11754481_x_at | turquoise | coronin 7(CORO7)                                                        | Homo sapiens |
| 4060 | 11754491_a_at | turquoise | chromosome 16 open reading frame 46(C16orf46)                           | Homo sapiens |
| 4061 | 11754492_x_at | turquoise | phospholipase C beta 2(PLCB2)                                           | Homo sapiens |
| 4062 | 11754503_a_at | turquoise | choline/ethanolamine phosphotransferase 1(CEPT1)                        | Homo sapiens |
| 4064 | 11754524_x_at | turquoise | tissue factor pathway inhibitor 2(TFPI2)                                | Homo sapiens |
| 4065 | 11754551_x_at | turquoise | enolase 1(ENO1)                                                         | Homo sapiens |
| 4066 | 11754554_x_at | turquoise | enoyl-CoA hydratase domain containing 2(ECHDC2)                         | Homo sapiens |
| 4067 | 11754579_at   | turquoise | pappalysin 1(PAPPA)                                                     | Homo sapiens |
| 4068 | 11754584_a_at | turquoise | RAD9-HUS1-RAD1 interacting nuclear orphan 1(RHNO1)                      | Homo sapiens |
| 4069 | 11754587_a_at | turquoise | FYN proto-oncogene, Src family tyrosine kinase(FYN)                     | Homo sapiens |

|      |               |           |                                                                                   |              |
|------|---------------|-----------|-----------------------------------------------------------------------------------|--------------|
| 4070 | 11754589_a_at | turquoise | exportin 6(XPO6)                                                                  | Homo sapiens |
| 4071 | 11754592_x_at | turquoise | activating transcription factor 5(ATF5)                                           | Homo sapiens |
| 4072 | 11754593_x_at | turquoise | tubulin beta 3 class III(TUBB3)                                                   | Homo sapiens |
| 4074 | 11754603_a_at | turquoise | dual specificity phosphatase 18(DUSP18)                                           | Homo sapiens |
| 4075 | 11754609_x_at | turquoise | stathmin 3(STMN3)                                                                 | Homo sapiens |
| 4076 | 11754615_x_at | turquoise | ubiquitin fold modifier 1(UFM1)                                                   | Homo sapiens |
| 4078 | 11754627_s_at | turquoise | RAB37, member RAS oncogene family(RAB37)                                          | Homo sapiens |
| 4079 | 11754630_a_at | turquoise | mixed lineage kinase domain like(MLKL)                                            | Homo sapiens |
| 4080 | 11754637_a_at | turquoise | synaptotagmin like 1(SYTL1)                                                       | Homo sapiens |
| 4081 | 11754644_x_at | turquoise | calponin 2(CNN2)                                                                  | Homo sapiens |
| 4082 | 11754649_s_at | turquoise | IL2 inducible T-cell kinase(ITK)                                                  | Homo sapiens |
| 4084 | 11754666_a_at | turquoise | coronin 1A(CORO1A)                                                                | Homo sapiens |
| 4085 | 11754672_a_at | turquoise | checkpoint with forkhead and ring finger domains(CHFR)                            | Homo sapiens |
| 4086 | 11754678_a_at | turquoise | solute carrier family 25 member 43(SLC25A43)                                      | Homo sapiens |
| 4087 | 11754680_a_at | turquoise | mitogen-activated protein kinase kinase kinase 2(MAP3K2)                          | Homo sapiens |
| 4088 | 11754681_s_at | turquoise | major histocompatibility complex, class II, DM beta(HLA-DMB)                      | Homo sapiens |
| 4089 | 11754695_a_at | turquoise | phospholipase A2 group V(PLA2G5)                                                  | Homo sapiens |
| 4091 | 11754712_a_at | turquoise | TBC1 domain family member 10A(TBC1D10A)                                           | Homo sapiens |
| 4092 | 11754716_s_at | turquoise | GATA zinc finger domain containing 2A(GATAD2A)                                    | Homo sapiens |
| 4093 | 11754722_s_at | turquoise | SEPSECS antisense RNA 1 (head to head)(SEPSECS-AS1)                               | Homo sapiens |
| 4094 | 11754724_a_at | turquoise | coiled-coil domain containing 88B(CCDC88B)                                        | Homo sapiens |
| 4095 | 11754751_x_at | turquoise | BCL2 associated athanogene 1(BAG1)                                                | Homo sapiens |
| 4096 | 11754752_a_at | turquoise | outer dense fiber of sperm tails 3B(ODF3B)                                        | Homo sapiens |
| 4097 | 11754759_a_at | turquoise | chromatin target of PRMT1(CHTOP)                                                  | Homo sapiens |
| 4098 | 11754760_a_at | turquoise | GRAM domain containing 1A(GRAMD1A)                                                | Homo sapiens |
| 4099 | 11754761_x_at | turquoise | high mobility group nucleosome binding domain 1(HMGN1)                            | Homo sapiens |
| 4100 | 11754762_x_at | turquoise | T-cell immune regulator 1, ATPase H+ transporting V0 subunit a3(TCIRG1)           | Homo sapiens |
| 4101 | 11754765_s_at | turquoise | microRNA 6080(MIR6080)                                                            | Homo sapiens |
| 4102 | 11754769_a_at | turquoise | BEN domain containing 5(BEND5)                                                    | Homo sapiens |
| 4103 | 11754777_a_at | turquoise | SH2 domain containing 2A(SH2D2A)                                                  | Homo sapiens |
| 4105 | 11754798_s_at | turquoise | CD164 molecule(CD164)                                                             | Homo sapiens |
| 4106 | 11754802_s_at | turquoise | chromosome 12 open reading frame 76(C12orf76)                                     | Homo sapiens |
| 4107 | 11754808_s_at | turquoise | C3 and PZP like, alpha-2-macroglobulin domain containing 8(CPAMD8)                | Homo sapiens |
| 4108 | 11754814_a_at | turquoise | nucleoporin 93(NUP93)                                                             | Homo sapiens |
| 4109 | 11754822_x_at | turquoise | tyrosyl-DNA phosphodiesterase 1(TDP1)                                             | Homo sapiens |
| 4110 | 11754828_a_at | turquoise | butyrophilin subfamily 2 member A2(BTN2A2)                                        | Homo sapiens |
| 4111 | 11754833_a_at | turquoise | toll like receptor 2(TLR2)                                                        | Homo sapiens |
| 4112 | 11754835_a_at | turquoise | immunoglobulin superfamily member 21(IGSF21)                                      | Homo sapiens |
| 4113 | 11754839_x_at | turquoise | ubiquitin specific peptidase 54(USP54)                                            | Homo sapiens |
| 4114 | 11754842_x_at | turquoise | meiotic double-stranded break formation protein 1(ME11)                           | Homo sapiens |
| 4116 | 11754859_x_at | turquoise | RUN and cysteine rich domain containing beclin 1 interacting protein like(RUBCNL) | Homo sapiens |
| 4118 | 11754869_s_at | turquoise | zinc finger protein 267(ZNF267)                                                   | Homo sapiens |
| 4119 | 11754870_x_at | turquoise | Mab-21 domain containing 1(MB21D1)                                                | Homo sapiens |
| 4120 | 11754881_a_at | turquoise | signal regulatory protein gamma(SIRPG)                                            | Homo sapiens |
| 4121 | 11754884_s_at | turquoise | WD repeat and FYVE domain containing 1(WDFY1)                                     | Homo sapiens |
| 4122 | 11754887_a_at | turquoise | methionine sulfoxide reductase B3(MSRB3)                                          | Homo sapiens |
| 4124 | 11754910_x_at | turquoise | MICAL like 2(MICAL2)                                                              | Homo sapiens |
| 4125 | 11754917_a_at | turquoise | SP100 nuclear antigen(SP100)                                                      | Homo sapiens |
| 4126 | 11754920_s_at | turquoise | vesicular, overexpressed in cancer, prosurvival protein 1(VOPP1)                  | Homo sapiens |
| 4127 | 11754925_a_at | turquoise | spleen associated tyrosine kinase(SYK)                                            | Homo sapiens |
| 4128 | 11754942_x_at | turquoise | chromosome 17 open reading frame 62(C17orf62)                                     | Homo sapiens |
| 4129 | 11754945_x_at | turquoise | transketolase(TKT)                                                                | Homo sapiens |
| 4130 | 11754946_a_at | turquoise | chromosome 7 open reading frame 49(C7orf49)                                       | Homo sapiens |
| 4131 | 11754951_a_at | turquoise | nuclear receptor coactivator 7(NCOA7)                                             | Homo sapiens |
| 4133 | 11754972_s_at | turquoise | bromodomain adjacent to zinc finger domain 2A(BAZ2A)                              | Homo sapiens |
| 4134 | 11754976_x_at | turquoise | canopy FGF signaling regulator 3(CNPY3)                                           | Homo sapiens |
| 4135 | 11754989_a_at | turquoise | Dmx like 2(DMXL2)                                                                 | Homo sapiens |
| 4136 | 11754992_a_at | turquoise | chromodomain helicase DNA binding protein 1(CHD1)                                 | Homo sapiens |
| 4137 | 11754998_a_at | turquoise | multiple C2 and transmembrane domain containing 1(MCTP1)                          | Homo sapiens |
| 4138 | 11755010_s_at | turquoise | POC1B-GALNT4 readthrough(POC1B-GALNT4)                                            | Homo sapiens |
| 4139 | 11755012_a_at | turquoise | CDC42 small effector 2(CDC42SE2)                                                  | Homo sapiens |
| 4140 | 11755013_x_at | turquoise | TNF receptor superfamily member 1B(TNFRSF1B)                                      | Homo sapiens |
| 4142 | 11755022_a_at | turquoise | ADP ribosylation factor like GTPase 6 interacting protein 1(ARL6IP1)              | Homo sapiens |
| 4143 | 11755032_s_at | turquoise | ArfGAP with SH3 domain, ankyrin repeat and PH domain 1(ASAP1)                     | Homo sapiens |
| 4144 | 11755036_a_at | turquoise | 2',3'-cyclic nucleotide 3' phosphodiesterase(CNP)                                 | Homo sapiens |
| 4145 | 11755043_a_at | turquoise | gamma-secretase activating protein(GSAP)                                          | Homo sapiens |
| 4146 | 11755044_x_at | turquoise | gamma-secretase activating protein(GSAP)                                          | Homo sapiens |
| 4147 | 11755045_s_at | turquoise | ankyrin repeat domain 13A(ANKRD13A)                                               | Homo sapiens |
| 4148 | 11755054_x_at | turquoise | runt related transcription factor 3(RUNX3)                                        | Homo sapiens |
| 4149 | 11755058_a_at | turquoise | bromodomain adjacent to zinc finger domain 1A(BAZ1A)                              | Homo sapiens |
| 4150 | 11755059_s_at | turquoise | transcription factor 3(TCF3)                                                      | Homo sapiens |
| 4151 | 11755070_a_at | turquoise | caspase recruitment domain family member 8(CARD8)                                 | Homo sapiens |
| 4152 | 11755075_s_at | turquoise | NAD synthetase 1(NADSYN1)                                                         | Homo sapiens |
| 4153 | 11755076_x_at | turquoise | ORAI calcium release-activated calcium modulator 2(ORAI2)                         | Homo sapiens |
| 4154 | 11755078_a_at | turquoise | transcriptional adaptor 2B(TADA2B)                                                | Homo sapiens |
| 4155 | 11755091_a_at | turquoise | ATP binding cassette subfamily A member 7(ABCA7)                                  | Homo sapiens |
| 4156 | 11755105_a_at | turquoise | diacylglycerol kinase zeta(DGKZ)                                                  | Homo sapiens |
| 4157 | 11755116_x_at | turquoise | abhydrolase domain containing 11(ABHD11)                                          | Homo sapiens |
| 4158 | 11755117_x_at | turquoise | F-box and leucine rich repeat protein 22(FBXL22)                                  | Homo sapiens |
| 4159 | 11755121_x_at | turquoise | organic solute carrier partner 1(OSCP1)                                           | Homo sapiens |
| 4160 | 11755135_a_at | turquoise | abhydrolase domain containing 1(ABHD1)                                            | Homo sapiens |
| 4161 | 11755137_a_at | turquoise | mitochondrial calcium uniporter dominant negative beta subunit(MCUB)              | Homo sapiens |

|      |               |           |                                                                                   |              |
|------|---------------|-----------|-----------------------------------------------------------------------------------|--------------|
| 4162 | 11755147_s_at | turquoise | signal transducer and activator of transcription 2(STAT2)                         | Homo sapiens |
| 4163 | 11755148_a_at | turquoise | Dmx like 2(DMXL2)                                                                 | Homo sapiens |
| 4164 | 11755151_a_at | turquoise | aryl hydrocarbon receptor nuclear translocator like(ARNTL)                        | Homo sapiens |
| 4165 | 11755175_a_at | turquoise | heat shock protein family A (Hsp70) member 12A(HSPA12A)                           | Homo sapiens |
| 4166 | 11755180_x_at | turquoise | transcription factor 7 (T-cell specific, HMG-box)(TCF7)                           | Homo sapiens |
| 4167 | 11755222_a_at | turquoise | G protein subunit alpha 13(GNA13)                                                 | Homo sapiens |
| 4168 | 11755231_a_at | turquoise | LCK proto-oncogene, Src family tyrosine kinase(LCK)                               | Homo sapiens |
| 4169 | 11755235_a_at | turquoise | fatty acyl-CoA reductase 2(FAR2)                                                  | Homo sapiens |
| 4170 | 11755237_a_at | turquoise | protein phosphatase, Mg2+/Mn2+ dependent 1M(PPM1M)                                | Homo sapiens |
| 4171 | 11755246_x_at | turquoise | growth regulation by estrogen in breast cancer 1(GREB1)                           | Homo sapiens |
| 4172 | 11755247_x_at | turquoise | DAN domain BMP antagonist family member 5(DAND5)                                  | Homo sapiens |
| 4173 | 11755265_s_at | turquoise | 5'-nucleotidase domain containing 1(NTSDC1)                                       | Homo sapiens |
| 4176 | 11755279_x_at | turquoise | major histocompatibility complex, class II, DP beta 1(HLA-DPB1)                   | Homo sapiens |
| 4177 | 11755280_x_at | turquoise | ferritin light chain(FTL)                                                         | Homo sapiens |
| 4178 | 11755281_a_at | turquoise | transforming growth factor beta induced(TGFB1)                                    | Homo sapiens |
| 4179 | 11755291_a_at | turquoise | DENN domain containing 2D(DENND2D)                                                | Homo sapiens |
| 4180 | 11755292_a_at | turquoise | cytochrome b561 family member A3(CYB561A3)                                        | Homo sapiens |
| 4181 | 11755303_x_at | turquoise | major histocompatibility complex, class I, A(HLA-A)                               | Homo sapiens |
| 4182 | 11755315_a_at | turquoise | arginyl aminopeptidase(RNPEP)                                                     | Homo sapiens |
| 4183 | 11755319_a_at | turquoise | ankyrin repeat domain 13D(ANKRD13D)                                               | Homo sapiens |
| 4184 | 11755320_x_at | turquoise | ankyrin repeat domain 13D(ANKRD13D)                                               | Homo sapiens |
| 4185 | 11755326_x_at | turquoise | abhydrolase domain containing 16A(ABHD16A)                                        | Homo sapiens |
| 4186 | 11755327_s_at | turquoise | family with sequence similarity 115, member C pseudogene(LOC154761)               | Homo sapiens |
| 4187 | 11755331_a_at | turquoise | ankyrin 2(ANK2)                                                                   | Homo sapiens |
| 4188 | 11755342_x_at | turquoise | microRNA 1292(MIR1292)                                                            | Homo sapiens |
| 4189 | 11755343_s_at | turquoise | SET domain and mariner transposase fusion gene(SETMAR)                            | Homo sapiens |
| 4190 | 11755344_x_at | turquoise | major histocompatibility complex, class I, A(HLA-A)                               | Homo sapiens |
| 4193 | 11755355_s_at | turquoise | RCS domain containing 1(RCSD1)                                                    | Homo sapiens |
| 4194 | 11755357_s_at | turquoise | aconitase 1(ACO1)                                                                 | Homo sapiens |
| 4195 | 11755361_a_at | turquoise | de-etiolated homolog 1 (Arabidopsis)(DET1)                                        | Homo sapiens |
| 4196 | 11755373_x_at | turquoise | enoyl-CoA hydratase domain containing 2(ECHDC2)                                   | Homo sapiens |
| 4197 | 11755374_a_at | turquoise | HECT and RLD domain containing E3 ubiquitin protein ligase 5(HERCS5)              | Homo sapiens |
| 4199 | 11755387_a_at | turquoise | SAC1 suppressor of actin mutations 1-like (yeast)(SACM1L)                         | Homo sapiens |
| 4200 | 11755391_x_at | turquoise | H2A histone family member Y(H2AFY)                                                | Homo sapiens |
| 4201 | 11755405_a_at | turquoise | RUN and cysteine rich domain containing beclin 1 interacting protein like(RUBCNL) | Homo sapiens |
| 4202 | 11755411_a_at | turquoise | inhibitor of kappa light polypeptide gene enhancer in B-cells, kinase beta(IKKBK) | Homo sapiens |
| 4203 | 11755412_x_at | turquoise | inhibitor of kappa light polypeptide gene enhancer in B-cells, kinase beta(IKKBK) | Homo sapiens |
| 4204 | 11755417_a_at | turquoise | KIAA0922(KIAA0922)                                                                | Homo sapiens |
| 4205 | 11755422_s_at | turquoise | CD6 molecule(CD6)                                                                 | Homo sapiens |
| 4207 | 11755426_x_at | turquoise | Sec61 translocon alpha 1 subunit(SEC61A1)                                         | Homo sapiens |
| 4208 | 11755433_x_at | turquoise | uncharacterized LOC100505585(LOC100505585)                                        | Homo sapiens |
| 4209 | 11755443_a_at | turquoise | monoamine oxidase A(MAOA)                                                         | Homo sapiens |
| 4211 | 11755469_x_at | turquoise | minichromosome maintenance complex component 7(MCM7)                              | Homo sapiens |
| 4212 | 11755474_a_at | turquoise | ADAM metallopeptidase domain 15(ADAM15)                                           | Homo sapiens |
| 4213 | 11755476_a_at | turquoise | nicotinamide nucleotide adenyllyltransferase 3(NMNAT3)                            | Homo sapiens |
| 4214 | 11755481_a_at | turquoise | DNA helicase B(HELB)                                                              | Homo sapiens |
| 4215 | 11755482_x_at | turquoise | G protein-coupled receptor 132(GPR132)                                            | Homo sapiens |
| 4216 | 11755483_x_at | turquoise | protein phosphatase 1 regulatory subunit 21(PPP1R21)                              | Homo sapiens |
| 4217 | 11755522_a_at | turquoise | leupaxin(LPXN)                                                                    | Homo sapiens |
| 4218 | 11755523_a_at | turquoise | RNA binding motif protein 47(RBM47)                                               | Homo sapiens |
| 4219 | 11755533_a_at | turquoise | adhesion G protein-coupled receptor A3(ADGRA3)                                    | Homo sapiens |
| 4220 | 11755546_a_at | turquoise | LFNG O-fucosylpeptide 3-beta-N-acetylglucosaminyltransferase(LFNG)                | Homo sapiens |
| 4221 | 11755547_a_at | turquoise | serine/threonine kinase 33(STK33)                                                 | Homo sapiens |
| 4222 | 11755549_a_at | turquoise | semaphorin 6D(SEMA6D)                                                             | Homo sapiens |
| 4223 | 11755556_a_at | turquoise | exocyst complex component 2(EXOC2)                                                | Homo sapiens |
| 4224 | 11755564_x_at | turquoise | C-C motif chemokine ligand 3 like 3(CCL3L3)                                       | Homo sapiens |
| 4225 | 11755577_x_at | turquoise | meiotic double-stranded break formation protein 1(ME1)                            | Homo sapiens |
| 4226 | 11755587_a_at | turquoise | tripartite motif containing 22(TRIM22)                                            | Homo sapiens |
| 4227 | 11755606_x_at | turquoise | IFI30, lysosomal thiol reductase(IFI30)                                           | Homo sapiens |
| 4228 | 11755615_a_at | turquoise | Janus kinase and microtubule interacting protein 3(JAKMIP3)                       | Homo sapiens |
| 4229 | 11755616_a_at | turquoise | solute carrier family 8 member B1(SLC8B1)                                         | Homo sapiens |
| 4230 | 11755622_x_at | turquoise | roundabout guidance receptor 4(ROBO4)                                             | Homo sapiens |
| 4231 | 11755631_x_at | turquoise | required for meiotic nuclear division 1 homolog(RMND1)                            | Homo sapiens |
| 4232 | 11755641_s_at | turquoise | post-GPI attachment to proteins 1(PGAP1)                                          | Homo sapiens |
| 4233 | 11755646_a_at | turquoise | sialic acid binding Ig like lectin 1(SIGLEC1)                                     | Homo sapiens |
| 4234 | 11755671_a_at | turquoise | synaptotagmin like 2(SYTL2)                                                       | Homo sapiens |
| 4235 | 11755676_a_at | turquoise | interaction protein for cytohesin exchange factors 1(IPCEF1)                      | Homo sapiens |
| 4236 | 11755703_a_at | turquoise | zinc finger protein 287(ZNF287)                                                   | Homo sapiens |
| 4237 | 11755705_a_at | turquoise | small integral membrane protein 5(SMIM5)                                          | Homo sapiens |
| 4238 | 11755709_s_at | turquoise | La ribonucleoprotein domain family member 6(LARP6)                                | Homo sapiens |
| 4240 | 11755717_a_at | turquoise | docking protein 2(DOK2)                                                           | Homo sapiens |
| 4241 | 11755718_s_at | turquoise | histone deacetylase 1(HDAC1)                                                      | Homo sapiens |
| 4242 | 11755747_a_at | turquoise | placenta specific 8(PLAC8)                                                        | Homo sapiens |
| 4243 | 11755748_s_at | turquoise | placenta specific 8(PLAC8)                                                        | Homo sapiens |
| 4244 | 11755755_a_at | turquoise | integrator complex subunit 6 like(INTS6L)                                         | Homo sapiens |
| 4245 | 11755758_s_at | turquoise | NLR family CARD domain containing 5(NLRCS)                                        | Homo sapiens |
| 4246 | 11755762_a_at | turquoise | transmembrane protein 2(TMEM2)                                                    | Homo sapiens |
| 4247 | 11755766_x_at | turquoise | sorting nexin family member 30(SNX30)                                             | Homo sapiens |
| 4248 | 11755778_a_at | turquoise | roundabout guidance receptor 4(ROBO4)                                             | Homo sapiens |
| 4250 | 11755811_a_at | turquoise | zinc finger protein 266(ZNF266)                                                   | Homo sapiens |
| 4251 | 11755818_a_at | turquoise | FYVE and coiled-coil domain containing 1(FYCO1)                                   | Homo sapiens |
| 4252 | 11755819_a_at | turquoise | DExD/H-box helicase 58(DDX58)                                                     | Homo sapiens |

|      |               |           |                                                                                    |              |
|------|---------------|-----------|------------------------------------------------------------------------------------|--------------|
| 4253 | 11755830_a_at | turquoise | myosin IG(MYO1G)                                                                   | Homo sapiens |
| 4254 | 11755858_a_at | turquoise | membrane spanning 4-domains A1(MS4A1)                                              | Homo sapiens |
| 4255 | 11755874_a_at | turquoise | bora, aurora kinase A activator(BORA)                                              | Homo sapiens |
| 4257 | 11755882_a_at | turquoise | solute carrier family 35 member B3(SLC35B3)                                        | Homo sapiens |
| 4258 | 11755888_a_at | turquoise | regucalcin(RGN)                                                                    | Homo sapiens |
| 4259 | 11755902_a_at | turquoise | transient receptor potential cation channel subfamily V member 2(TRPV2)            | Homo sapiens |
| 4260 | 11755903_x_at | turquoise | NEDD4 binding protein 2 like 1(N4BP2L1)                                            | Homo sapiens |
| 4261 | 11755908_s_at | turquoise | immunoglobulin superfamily member 3(IGSF3)                                         | Homo sapiens |
| 4262 | 11755912_s_at | turquoise | YEATS domain containing 2(YEATS2)                                                  | Homo sapiens |
| 4263 | 11755915_a_at | turquoise | HPS3, biogenesis of lysosomal organelles complex 2 subunit 1(HPS3)                 | Homo sapiens |
| 4264 | 11755932_a_at | turquoise | hematopoietic cell-specific Lyn substrate 1(HCLS1)                                 | Homo sapiens |
| 4265 | 11755933_x_at | turquoise | major histocompatibility complex, class I, B(HLA-B)                                | Homo sapiens |
| 4266 | 11755943_x_at | turquoise | vimentin(VIM)                                                                      | Homo sapiens |
| 4267 | 11755952_x_at | turquoise | arrestin beta 2(ARRB2)                                                             | Homo sapiens |
| 4269 | 11755966_x_at | turquoise | major histocompatibility complex, class I, B(HLA-B)                                | Homo sapiens |
| 4271 | 11755990_a_at | turquoise | calpain 12(CAPN12)                                                                 | Homo sapiens |
| 4272 | 11755997_a_at | turquoise | sterile alpha motif domain containing 9 like(SAMD9L)                               | Homo sapiens |
| 4273 | 11756006_x_at | turquoise | LCK proto-oncogene, Src family tyrosine kinase(LCK)                                | Homo sapiens |
| 4274 | 11756011_a_at | turquoise | protein tyrosine phosphatase, receptor type J(PTPRJ)                               | Homo sapiens |
| 4275 | 11756061_x_at | turquoise | small nucleolar RNA, H/ACA box 64(SNORA64)                                         | Homo sapiens |
| 4276 | 11756068_a_at | turquoise | beta-site APP-cleaving enzyme 2(BACE2)                                             | Homo sapiens |
| 4277 | 11756071_x_at | turquoise | actin beta(ACTB)                                                                   | Homo sapiens |
| 4278 | 11756073_x_at | turquoise | major histocompatibility complex, class II, DP beta 1(HLA-DPB1)                    | Homo sapiens |
| 4279 | 11756077_a_at | turquoise | nudE neurodevelopment protein 1(NDE1)                                              | Homo sapiens |
| 4280 | 11756083_x_at | turquoise | major histocompatibility complex, class II, DQ alpha 1(HLA-DQA1)                   | Homo sapiens |
| 4281 | 11756089_s_at | turquoise | macrophage scavenger receptor 1(MSR1)                                              | Homo sapiens |
| 4284 | 11756109_s_at | turquoise | mannosyl (alpha-1,6-)-glycoprotein beta-1,2-N-acetylglucosaminyltransferase(MGAT2) | Homo sapiens |
| 4286 | 11756138_a_at | turquoise | hexokinase 2(HK2)                                                                  | Homo sapiens |
| 4287 | 11756146_x_at | turquoise | S100 calcium binding protein A4(S100A4)                                            | Homo sapiens |
| 4288 | 11756150_at   | turquoise | beta-2-microglobulin(B2M)                                                          | Homo sapiens |
| 4289 | 11756151_x_at | turquoise | beta-2-microglobulin(B2M)                                                          | Homo sapiens |
| 4290 | 11756168_x_at | turquoise | RAB13, member RAS oncogene family(RAB13)                                           | Homo sapiens |
| 4291 | 11756170_a_at | turquoise | chromosome X open reading frame 38(CXorf38)                                        | Homo sapiens |
| 4292 | 11756175_a_at | turquoise | NSE4 homolog A, SMC5-SMC6 complex component(NSMCE4A)                               | Homo sapiens |
| 4293 | 11756176_a_at | turquoise | eukaryotic translation initiation factor 4A3(EIF4A3)                               | Homo sapiens |
| 4294 | 11756177_s_at | turquoise | CKLF like MARVEL transmembrane domain containing 6(CMTM6)                          | Homo sapiens |
| 4295 | 11756178_s_at | turquoise | CKLF like MARVEL transmembrane domain containing 6(CMTM6)                          | Homo sapiens |
| 4296 | 11756181_x_at | turquoise | tyrosine 3-monooxygenase/tryptophan 5-monooxygenase activation protein zeta(YWHAZ) | Homo sapiens |
| 4299 | 11756223_s_at | turquoise | DExD-box helicase 21(DDX21)                                                        | Homo sapiens |
| 4300 | 11756225_s_at | turquoise | DnaJ heat shock protein family (Hsp40) member B6(DNAJB6)                           | Homo sapiens |
| 4301 | 11756226_a_at | turquoise | GRIP1 associated protein 1(GRIPAP1)                                                | Homo sapiens |
| 4302 | 11756228_s_at | turquoise | NECAP endocytosis associated 2(NECAP2)                                             | Homo sapiens |
| 4305 | 11756243_a_at | turquoise | dual adaptor of phosphotyrosine and 3-phosphoinositides 1(DAPP1)                   | Homo sapiens |
| 4306 | 11756245_s_at | turquoise | annexin A5(ANXA5)                                                                  | Homo sapiens |
| 4307 | 11756255_x_at | turquoise | tyrosine 3-monooxygenase/tryptophan 5-monooxygenase activation protein eta(YWHAH)  | Homo sapiens |
| 4308 | 11756280_a_at | turquoise | nudix hydrolase 5(NUDT5)                                                           | Homo sapiens |
| 4309 | 11756281_a_at | turquoise | CD7 molecule(CD7)                                                                  | Homo sapiens |
| 4310 | 11756283_s_at | turquoise | cell division cycle and apoptosis regulator 1(CCAR1)                               | Homo sapiens |
| 4311 | 11756287_a_at | turquoise | acyloxyacyl hydrolase(AOAH)                                                        | Homo sapiens |
| 4312 | 11756289_x_at | turquoise | CCM2 scaffolding protein(CCM2)                                                     | Homo sapiens |
| 4313 | 11756292_a_at | turquoise | cathepsin W(CTSW)                                                                  | Homo sapiens |
| 4315 | 11756302_x_at | turquoise | CD37 molecule(CD37)                                                                | Homo sapiens |
| 4316 | 11756303_a_at | turquoise | SH3 domain and tetratricopeptide repeats 1(SH3TC1)                                 | Homo sapiens |
| 4317 | 11756306_a_at | turquoise | poly(ADP-ribose) polymerase family member 9(PARP9)                                 | Homo sapiens |
| 4318 | 11756309_x_at | turquoise | RAB24, member RAS oncogene family(RAB24)                                           | Homo sapiens |
| 4319 | 11756317_a_at | turquoise | zinc finger protein 276(ZNF276)                                                    | Homo sapiens |
| 4320 | 11756320_a_at | turquoise | nudix hydrolase 13(NUDT13)                                                         | Homo sapiens |
| 4321 | 11756322_x_at | turquoise | CNDP dipeptidase 2 (metallopeptidase M20 family)(CNDP2)                            | Homo sapiens |
| 4322 | 11756327_x_at | turquoise | ribosomal protein S19(RPS19)                                                       | Homo sapiens |
| 4323 | 11756330_a_at | turquoise | DExD/H-box helicase 58(DDX58)                                                      | Homo sapiens |
| 4325 | 11756358_a_at | turquoise | polo like kinase 3(PLK3)                                                           | Homo sapiens |
| 4326 | 11756362_x_at | turquoise | Fc fragment of IgG receptor 1c, pseudogene(FCGR1CP)                                | Homo sapiens |
| 4327 | 11756363_a_at | turquoise | NCK associated protein 1 like(NCKAP1L)                                             | Homo sapiens |
| 4329 | 11756369_a_at | turquoise | mitochondrial trans-2-enoyl-CoA reductase(MECR)                                    | Homo sapiens |
| 4331 | 11756386_s_at | turquoise | WD repeat domain 1(WDR1)                                                           | Homo sapiens |
| 4332 | 11756387_x_at | turquoise | ADP ribosylation factor like GTPase 4A(ARL4A)                                      | Homo sapiens |
| 4333 | 11756391_a_at | turquoise | microtubule interacting and trafficking domain containing 1(MITD1)                 | Homo sapiens |
| 4334 | 11756393_x_at | turquoise | coronin 1A(CORO1A)                                                                 | Homo sapiens |
| 4335 | 11756401_x_at | turquoise | family with sequence similarity 49 member B(FAM49B)                                | Homo sapiens |
| 4336 | 11756411_a_at | turquoise | stabilin 1(STAB1)                                                                  | Homo sapiens |
| 4337 | 11756417_x_at | turquoise | kizuna centrosomal protein(KIZ)                                                    | Homo sapiens |
| 4338 | 11756429_x_at | turquoise | oligosaccharyltransferase complex non-catalytic subunit(OSTC)                      | Homo sapiens |
| 4339 | 11756434_a_at | turquoise | DNA methyltransferase 1(DNMT1)                                                     | Homo sapiens |
| 4340 | 11756449_x_at | turquoise | RANBP2-type and C3HC4-type zinc finger containing 1(RBCK1)                         | Homo sapiens |
| 4341 | 11756453_a_at | turquoise | SH2 domain containing 3C(SH2D3C)                                                   | Homo sapiens |
| 4342 | 11756467_x_at | turquoise | transmembrane protein 50A(TMEM50A)                                                 | Homo sapiens |
| 4343 | 11756479_x_at | turquoise | ribonuclease T2(RNASET2)                                                           | Homo sapiens |
| 4344 | 11756485_a_at | turquoise | taxilin alpha(TXLNA)                                                               | Homo sapiens |
| 4348 | 11756512_a_at | turquoise | zinc fingers and homeoboxes 3(ZHX3)                                                | Homo sapiens |
| 4349 | 11756523_x_at | turquoise | shisa family member 5(SHISA5)                                                      | Homo sapiens |
| 4350 | 11756525_a_at | turquoise | IDi2 antisense RNA 1(IDI2-AS1)                                                     | Homo sapiens |
| 4352 | 11756532_a_at | turquoise | phosphatidylinositol-4,5-bisphosphate 3-kinase catalytic subunit delta(PIK3CD)     | Homo sapiens |

|      |               |           |                                                              |              |
|------|---------------|-----------|--------------------------------------------------------------|--------------|
| 4353 | 11756535_a_at | turquoise | solute carrier family 25 member 45(SLC25A45)                 | Homo sapiens |
| 4354 | 11756543_a_at | turquoise | nuclear RNA export factor 1(NXF1)                            | Homo sapiens |
| 4355 | 11756564_a_at | turquoise | ancient ubiquitous protein 1(AUP1)                           | Homo sapiens |
| 4356 | 11756572_x_at | turquoise | interferon regulatory factor 3(IRF3)                         | Homo sapiens |
| 4357 | 11756581_s_at | turquoise | protease, serine 23(PRSS23)                                  | Homo sapiens |
| 4359 | 11756603_a_at | turquoise | family with sequence similarity 206 member A(FAM206A)        | Homo sapiens |
| 4360 | 11756613_a_at | turquoise | semaphorin 6A(SEMA6A)                                        | Homo sapiens |
| 4361 | 11756617_a_at | turquoise | TAP binding protein(TAPBP)                                   | Homo sapiens |
| 4362 | 11756618_x_at | turquoise | TAP binding protein(TAPBP)                                   | Homo sapiens |
| 4363 | 11756626_s_at | turquoise | ZW10 interacting kinetochore protein(ZWINT)                  | Homo sapiens |
| 4364 | 11756632_a_at | turquoise | granulysin(GNLY)                                             | Homo sapiens |
| 4365 | 11756636_x_at | turquoise | PC-esterase domain containing 1A(PCED1A)                     | Homo sapiens |
| 4366 | 11756641_a_at | turquoise | zinc finger protein 256(ZNF256)                              | Homo sapiens |
| 4367 | 11756645_x_at | turquoise | C-X-C motif chemokine ligand 16(CXCL16)                      | Homo sapiens |
| 4369 | 11756655_a_at | turquoise | malonyl-CoA-acyl carrier protein transacylase(MCAT)          | Homo sapiens |
| 4371 | 11756668_x_at | turquoise | family with sequence similarity 213 member A(FAM213A)        | Homo sapiens |
| 4372 | 11756683_a_at | turquoise | CD1e molecule(CD1E)                                          | Homo sapiens |
| 4374 | 11756694_a_at | turquoise | ring finger protein 44(RNF44)                                | Homo sapiens |
| 4375 | 11756702_a_at | turquoise | cytochrome P450 family 39 subfamily A member 1(CYP39A1)      | Homo sapiens |
| 4376 | 11756709_x_at | turquoise | Bruton tyrosine kinase(BTK)                                  | Homo sapiens |
| 4377 | 11756712_a_at | turquoise | acid phosphatase 2, lysosomal(ACP2)                          | Homo sapiens |
| 4379 | 11756725_x_at | turquoise | shisa family member 5(SHISA5)                                | Homo sapiens |
| 4380 | 11756741_x_at | turquoise | SH3 domain binding glutamate rich protein like(SH3BGLR)      | Homo sapiens |
| 4381 | 11756746_a_at | turquoise | A-kinase interacting protein 1(AKIP1)                        | Homo sapiens |
| 4383 | 11756765_x_at | turquoise | BCL2 like 13(BCL2L13)                                        | Homo sapiens |
| 4384 | 11756766_x_at | turquoise | CD74 molecule(CD74)                                          | Homo sapiens |
| 4385 | 11756767_x_at | turquoise | primary cilia formation(PIFO)                                | Homo sapiens |
| 4386 | 11756780_a_at | turquoise | membrane spanning 4-domains A7(MS4A7)                        | Homo sapiens |
| 4387 | 11756786_x_at | turquoise | solute carrier family 38 member 9(SLC38A9)                   | Homo sapiens |
| 4388 | 11756787_a_at | turquoise | hyaluronan and proteoglycan link protein 3(HAPLN3)           | Homo sapiens |
| 4389 | 11756792_x_at | turquoise | microRNA 6837(MIR6837)                                       | Homo sapiens |
| 4390 | 11756793_a_at | turquoise | vanin 2(VNN2)                                                | Homo sapiens |
| 4391 | 11756806_a_at | turquoise | interferon stimulated exonuclease gene 20(ISG20)             | Homo sapiens |
| 4392 | 11756807_a_at | turquoise | receptor interacting serine/threonine kinase 1(RIPK1)        | Homo sapiens |
| 4393 | 11756809_a_at | turquoise | EF-hand domain containing 2(EFHC2)                           | Homo sapiens |
| 4394 | 11756818_a_at | turquoise | PAT1 homolog 2(PATL2)                                        | Homo sapiens |
| 4395 | 11756822_s_at | turquoise | lymphatic vessel endothelial hyaluronan receptor 1(LYVE1)    | Homo sapiens |
| 4396 | 11756827_a_at | turquoise | reticulin 1(RTN1)                                            | Homo sapiens |
| 4397 | 11756839_x_at | turquoise | zinc finger CCCH-type containing, antiviral 1(ZC3HAV1)       | Homo sapiens |
| 4398 | 11756847_a_at | turquoise | C-X3-C motif chemokine receptor 1(CX3CR1)                    | Homo sapiens |
| 4400 | 11756867_a_at | turquoise | tumor necrosis factor superfamily member 13b(TNFSF13B)       | Homo sapiens |
| 4401 | 11756869_a_at | turquoise | PDZ domain containing 2(PDZD2)                               | Homo sapiens |
| 4402 | 11756871_x_at | turquoise | sorting nexin 10(SNX10)                                      | Homo sapiens |
| 4403 | 11756883_s_at | turquoise | proline rich coiled-coil 2C(PRRC2C)                          | Homo sapiens |
| 4404 | 11756892_a_at | turquoise | C2 calcium dependent domain containing 2(C2CD2)              | Homo sapiens |
| 4405 | 11756913_s_at | turquoise | nucleotide binding oligomerization domain containing 1(NOD1) | Homo sapiens |
| 4406 | 11756924_s_at | turquoise | ATPase H+ transporting V1 subunit A(ATP6V1A)                 | Homo sapiens |
| 4407 | 11756946_x_at | turquoise | TBC1 domain family member 10C(TBC1D10C)                      | Homo sapiens |
| 4408 | 11756952_a_at | turquoise | transketolase(TKT)                                           | Homo sapiens |
| 4409 | 11756959_x_at | turquoise | protein kinase D2(PRKD2)                                     | Homo sapiens |
| 4410 | 11756976_a_at | turquoise | LON peptidase N-terminal domain and ring finger 2(LONRF2)    | Homo sapiens |
| 4411 | 11756977_a_at | turquoise | phytanoyl-CoA dioxygenase domain containing 1(PHYHD1)        | Homo sapiens |
| 4412 | 11756979_x_at | turquoise | tubulin alpha 1b(TUBA1B)                                     | Homo sapiens |
| 4413 | 11756984_a_at | turquoise | G protein subunit beta 2(GNB2)                               | Homo sapiens |
| 4414 | 11756994_a_at | turquoise | G protein subunit beta 2(GNB2)                               | Homo sapiens |
| 4415 | 11756999_a_at | turquoise | cytochrome b561 family member D2(CYB561D2)                   | Homo sapiens |
| 4417 | 11757022_x_at | turquoise | tissue factor pathway inhibitor 2(TFPI2)                     | Homo sapiens |
| 4419 | 11757035_a_at | turquoise | atypical chemokine receptor 1 (Duffy blood group)(ACKR1)     | Homo sapiens |
| 4420 | 11757037_s_at | turquoise | microRNA 4738(MIR4738)                                       | Homo sapiens |
| 4421 | 11757038_x_at | turquoise | microRNA 4738(MIR4738)                                       | Homo sapiens |
| 4422 | 11757049_a_at | turquoise | CTD phosphatase subunit 1(CTDP1)                             | Homo sapiens |
| 4423 | 11757050_x_at | turquoise | transgelin 2(TAGLN2)                                         | Homo sapiens |
| 4424 | 11757056_x_at | turquoise | microRNA 1244-1(MIR1244-1)                                   | Homo sapiens |
| 4425 | 11757059_x_at | turquoise | RPL36A-HNRNPH2 readthrough(RPL36A-HNRNPH2)                   | Homo sapiens |
| 4428 | 11757085_s_at | turquoise | N-acylsphingosine amidohydrolase 2(ASAH2)                    | Homo sapiens |
| 4429 | 11757141_s_at | turquoise | microRNA 1304(MIR1304)                                       | Homo sapiens |
| 4430 | 11757156_s_at | turquoise | small nucleolar RNA, H/ACA box 44(SNORA44)                   | Homo sapiens |
| 4431 | 11757164_s_at | turquoise | microRNA 1304(MIR1304)                                       | Homo sapiens |
| 4432 | 11757180_a_at | turquoise | casein kinase 1 gamma 2(CSNK1G2)                             | Homo sapiens |
| 4433 | 11757186_a_at | turquoise | hexokinase 3(HK3)                                            | Homo sapiens |
| 4434 | 11757190_s_at | turquoise | lipopolysaccharide induced TNF factor(LITAF)                 | Homo sapiens |
| 4435 | 11757194_a_at | turquoise | leishmanolysin like peptidase(LMLN)                          | Homo sapiens |
| 4436 | 11757213_a_at | turquoise | uncharacterized FLJ34503(FLJ34503)                           | Homo sapiens |
| 4437 | 11757259_x_at | turquoise | small Cajal body-specific RNA 9-like(SCARNA9L)               | Homo sapiens |
| 4440 | 11757269_s_at | turquoise | ferritin light chain(FTL)                                    | Homo sapiens |
| 4441 | 11757271_s_at | turquoise | sorting nexin 6(SNX6)                                        | Homo sapiens |
| 4442 | 11757274_s_at | turquoise | arginine and glutamate rich 1(ARGLU1)                        | Homo sapiens |
| 4443 | 11757275_x_at | turquoise | arginine and glutamate rich 1(ARGLU1)                        | Homo sapiens |
| 4447 | 11757284_x_at | turquoise | myeloid derived growth factor(MYDGF)                         | Homo sapiens |
| 4448 | 11757289_x_at | turquoise | clathrin light chain A(CLTA)                                 | Homo sapiens |
| 4449 | 11757291_s_at | turquoise | iron-sulfur cluster assembly enzyme(ISCU)                    | Homo sapiens |
| 4450 | 11757300_s_at | turquoise | ELOVL fatty acid elongase 5(ELOVL5)                          | Homo sapiens |

|      |               |           |                                                                              |              |
|------|---------------|-----------|------------------------------------------------------------------------------|--------------|
| 4451 | 11757321_a_at | turquoise | TAP binding protein(TAPBP)                                                   | Homo sapiens |
| 4452 | 11757326_s_at | turquoise | ferritin light chain(FTL)                                                    | Homo sapiens |
| 4453 | 11757327_x_at | turquoise | ferritin light chain(FTL)                                                    | Homo sapiens |
| 4455 | 11757332_x_at | turquoise | microRNA 3064(MIR3064)                                                       | Homo sapiens |
| 4457 | 11757335_s_at | turquoise | mitochondrial translational initiation factor 3(MTIF3)                       | Homo sapiens |
| 4458 | 11757337_x_at | turquoise | microRNA 6734(MIR6734)                                                       | Homo sapiens |
| 4459 | 11757338_x_at | turquoise | glyoxylate and hydroxypyruvate reductase(GRHPR)                              | Homo sapiens |
| 4460 | 11757342_x_at | turquoise | dCMP deaminase(DCTD)                                                         | Homo sapiens |
| 4461 | 11757344_x_at | turquoise | small nuclear ribonucleoprotein polypeptides B and B1(SNRPB)                 | Homo sapiens |
| 4462 | 11757346_s_at | turquoise | ferritin light chain(FTL)                                                    | Homo sapiens |
| 4463 | 11757351_a_at | turquoise | transporter 1, ATP binding cassette subfamily B member(TAP1)                 | Homo sapiens |
| 4464 | 11757367_s_at | turquoise | heat shock protein family A (Hsp70) member 6(HSPA6)                          | Homo sapiens |
| 4465 | 11757368_x_at | turquoise | annexin A4(ANXA4)                                                            | Homo sapiens |
| 4466 | 11757369_s_at | turquoise | mannosidase alpha class 2B member 1(MAN2B1)                                  | Homo sapiens |
| 4467 | 11757373_x_at | turquoise | apolipoprotein C1(APOC1)                                                     | Homo sapiens |
| 4468 | 11757379_a_at | turquoise | tyrosine kinase 2(TYK2)                                                      | Homo sapiens |
| 4469 | 11757383_a_at | turquoise | cathepsin H(CTSH)                                                            | Homo sapiens |
| 4470 | 11757404_x_at | turquoise | inhibitor of DNA binding 3, HLH protein(ID3)                                 | Homo sapiens |
| 4472 | 11757409_x_at | turquoise | thymosin beta 10(TMSB10)                                                     | Homo sapiens |
| 4474 | 11757415_s_at | turquoise | solute carrier family 5 member 3(SLC5A3)                                     | Homo sapiens |
| 4475 | 11757420_s_at | turquoise | ZFP36 ring finger protein like 2(ZFP36L2)                                    | Homo sapiens |
| 4476 | 11757425_s_at | turquoise | vascular cell adhesion molecule 1(VCAM1)                                     | Homo sapiens |
| 4478 | 11757435_x_at | turquoise | bridging integrator 1(BIN1)                                                  | Homo sapiens |
| 4479 | 11757436_s_at | turquoise | interferon induced transmembrane protein 2(IFITM2)                           | Homo sapiens |
| 4480 | 11757438_x_at | turquoise | destrin, actin depolymerizing factor(DSTN)                                   | Homo sapiens |
| 4481 | 11757439_s_at | turquoise | GDP dissociation inhibitor 2(GDI2)                                           | Homo sapiens |
| 4484 | 11757454_s_at | turquoise | cAMP responsive element binding protein like 2(CREBL2)                       | Homo sapiens |
| 4485 | 11757455_x_at | turquoise | glutathione peroxidase 1(GPX1)                                               | Homo sapiens |
| 4486 | 11757459_s_at | turquoise | WAS/WASL interacting protein family member 1(WIPF1)                          | Homo sapiens |
| 4487 | 11757464_x_at | turquoise | plexin B2(PLXNB2)                                                            | Homo sapiens |
| 4489 | 11757469_s_at | turquoise | tripeptidyl peptidase 1(TPP1)                                                | Homo sapiens |
| 4490 | 11757470_x_at | turquoise | transcription factor 25(TCF25)                                               | Homo sapiens |
| 4491 | 11757474_x_at | turquoise | chloride intracellular channel 1(CLIC1)                                      | Homo sapiens |
| 4492 | 11757477_s_at | turquoise | LIM and SH3 protein 1(LASP1)                                                 | Homo sapiens |
| 4493 | 11757480_x_at | turquoise | interferon alpha inducible protein 27(IFI27)                                 | Homo sapiens |
| 4494 | 11757483_s_at | turquoise | von Willebrand factor A domain containing 1(VWA1)                            | Homo sapiens |
| 4496 | 11757511_x_at | turquoise | major histocompatibility complex, class II, DP alpha 1(HLA-DPA1)             | Homo sapiens |
| 4497 | 11757513_at   | turquoise | NFKB inhibitor zeta(NFKBIZ)                                                  | Homo sapiens |
| 4498 | 11757519_x_at | turquoise | capping actin protein, gelsolin like(CAPG)                                   | Homo sapiens |
| 4500 | 11757529_s_at | turquoise | lysosomal associated membrane protein 1(LAMP1)                               | Homo sapiens |
| 4501 | 11757532_s_at | turquoise | RNA binding motif protein 47(RBM47)                                          | Homo sapiens |
| 4502 | 11757533_x_at | turquoise | phospholipid scramblase 1(PLSCR1)                                            | Homo sapiens |
| 4504 | 11757539_s_at | turquoise | stromal interaction molecule 2(STIM2)                                        | Homo sapiens |
| 4505 | 11757544_s_at | turquoise | intercellular adhesion molecule 2(ICAM2)                                     | Homo sapiens |
| 4506 | 11757545_x_at | turquoise | platelet and endothelial cell adhesion molecule 1(PECAM1)                    | Homo sapiens |
| 4507 | 11757546_x_at | turquoise | MICAL like 2(MICAL2)                                                         | Homo sapiens |
| 4508 | 11757552_x_at | turquoise | actin related protein 2/3 complex subunit 3(ARPC3)                           | Homo sapiens |
| 4509 | 11757554_s_at | turquoise | EGF like domain multiple 8(EGFL8)                                            | Homo sapiens |
| 4510 | 11757556_s_at | turquoise | bleomycin hydrolase(BLMH)                                                    | Homo sapiens |
| 4511 | 11757563_a_at | turquoise | protein phosphatase 1 regulatory subunit 35(PPP1R35)                         | Homo sapiens |
| 4512 | 11757566_x_at | turquoise | nucleolar protein 8(NOL8)                                                    | Homo sapiens |
| 4514 | 11757574_s_at | turquoise | transmembrane protein 123(TMEM123)                                           | Homo sapiens |
| 4515 | 11757588_a_at | turquoise | ALG5, dolichyl-phosphate beta-glucosyltransferase(ALG5)                      | Homo sapiens |
| 4517 | 11757590_s_at | turquoise | ISY1-RAB43 readthrough(ISY1-RAB43)                                           | Homo sapiens |
| 4518 | 11757591_s_at | turquoise | PAN3 poly(A) specific ribonuclease subunit(PAN3)                             | Homo sapiens |
| 4520 | 11757602_x_at | turquoise | endoplasmic reticulum protein 29(ERP29)                                      | Homo sapiens |
| 4521 | 11757604_a_at | turquoise | SAMM50 sorting and assembly machinery component(SAMM50)                      | Homo sapiens |
| 4523 | 11757624_s_at | turquoise | poly(ADP-ribose) polymerase family member 12(PARP12)                         | Homo sapiens |
| 4524 | 11757625_s_at | turquoise | CD200 molecule(CD200)                                                        | Homo sapiens |
| 4525 | 11757630_s_at | turquoise | HERPUD family member 2(HERPUD2)                                              | Homo sapiens |
| 4526 | 11757632_s_at | turquoise | LIM domain kinase 2(LIMK2)                                                   | Homo sapiens |
| 4527 | 11757635_a_at | turquoise | TYRO protein tyrosine kinase binding protein(TYROBP)                         | Homo sapiens |
| 4528 | 11757638_s_at | turquoise | CD93 molecule(CD93)                                                          | Homo sapiens |
| 4530 | 11757652_x_at | turquoise | prolyl 3-hydroxylase 1(P3H1)                                                 | Homo sapiens |
| 4531 | 11757653_s_at | turquoise | CDK5 regulatory subunit associated protein 3(CDK5RAP3)                       | Homo sapiens |
| 4532 | 11757654_x_at | turquoise | uncoupling protein 2(UCP2)                                                   | Homo sapiens |
| 4533 | 11757661_x_at | turquoise | small nuclear ribonucleoprotein polypeptides B and B1(SNRPB)                 | Homo sapiens |
| 4534 | 11757669_s_at | turquoise | peptidylprolyl isomerase like 1(PP1L1)                                       | Homo sapiens |
| 4537 | 11757692_s_at | turquoise | APC, WNT signaling pathway regulator(APC)                                    | Homo sapiens |
| 4538 | 11757713_x_at | turquoise | ataxin 2 like(ATXN2L)                                                        | Homo sapiens |
| 4539 | 11757722_s_at | turquoise | septin 8(SEPT8)                                                              | Homo sapiens |
| 4541 | 11757728_s_at | turquoise | ferritin light chain(FTL)                                                    | Homo sapiens |
| 4542 | 11757731_s_at | turquoise | RAB31, member RAS oncogene family(RAB31)                                     | Homo sapiens |
| 4543 | 11757732_x_at | turquoise | G protein subunit alpha i2(GNAI2)                                            | Homo sapiens |
| 4544 | 11757737_s_at | turquoise | recombination signal binding protein for immunoglobulin kappa J region(RBPJ) | Homo sapiens |
| 4545 | 11757756_s_at | turquoise | additional sex combs like 2, transcriptional regulator(ASXL2)                | Homo sapiens |
| 4546 | 11757765_s_at | turquoise | sarcoglycan delta(SGCD)                                                      | Homo sapiens |
| 4547 | 11757787_x_at | turquoise | ferritin light chain(FTL)                                                    | Homo sapiens |
| 4548 | 11757798_s_at | turquoise | MAF bZIP transcription factor 8(MAFB)                                        | Homo sapiens |
| 4549 | 11757801_x_at | turquoise | major histocompatibility complex, class II, DP beta 1(HLA-DPB1)              | Homo sapiens |
| 4550 | 11757806_x_at | turquoise | peroxiredoxin 6(PRX6)                                                        | Homo sapiens |
| 4551 | 11757807_x_at | turquoise | actin beta(ACTB)                                                             | Homo sapiens |



|      |               |           |                                                                                    |              |
|------|---------------|-----------|------------------------------------------------------------------------------------|--------------|
| 4552 | 11757816_s_at | turquoise | myristoylated alanine rich protein kinase C substrate(MARCKS)                      | Homo sapiens |
| 4553 | 11757817_s_at | turquoise | brain abundant membrane attached signal protein 1(BASP1)                           | Homo sapiens |
| 4554 | 11757818_x_at | turquoise | cofilin 1(CFL1)                                                                    | Homo sapiens |
| 4556 | 11757831_x_at | turquoise | synaptosome associated protein 23(SNAP23)                                          | Homo sapiens |
| 4557 | 11757833_a_at | turquoise | RAB31, member RAS oncogene family(RAB31)                                           | Homo sapiens |
| 4558 | 11757839_s_at | turquoise | NECAP endocytosis associated 2(NECAP2)                                             | Homo sapiens |
| 4561 | 11757867_s_at | turquoise | basic leucine zipper and W2 domains 1(BZW1)                                        | Homo sapiens |
| 4562 | 11757872_s_at | turquoise | phospholipid scramblase 1(PLSCR1)                                                  | Homo sapiens |
| 4564 | 11757875_s_at | turquoise | Lck interacting transmembrane adaptor 1(LIME1)                                     | Homo sapiens |
| 4565 | 11757879_s_at | turquoise | microRNA 6837(MIR6837)                                                             | Homo sapiens |
| 4566 | 11757883_s_at | turquoise | ring finger protein 4(RNF4)                                                        | Homo sapiens |
| 4567 | 11757887_x_at | turquoise | tyrosine 3-monooxygenase/tryptophan 5-monooxygenase activation protein beta(YWHAB) | Homo sapiens |
| 4568 | 11757890_a_at | turquoise | mitochondrial transcription termination factor 2(MTERF2)                           | Homo sapiens |
| 4569 | 11757894_x_at | turquoise | NFKB inhibitor alpha(NFKBIA)                                                       | Homo sapiens |
| 4570 | 11757896_s_at | turquoise | arginine and serine rich protein 1(RSRP1)                                          | Homo sapiens |
| 4571 | 11757904_s_at | turquoise | microtubule associated serine/threonine kinase 3(MAST3)                            | Homo sapiens |
| 4572 | 11757908_x_at | turquoise | ral guanine nucleotide dissociation stimulator(RALGDS)                             | Homo sapiens |
| 4573 | 11757917_s_at | turquoise | CCR4-NOT transcription complex subunit 6 like(CNOT6L)                              | Homo sapiens |
| 4574 | 11757920_s_at | turquoise | zyg-11 family member B, cell cycle regulator(ZYG11B)                               | Homo sapiens |
| 4575 | 11757931_s_at | turquoise | KIAA0930(KIAA0930)                                                                 | Homo sapiens |
| 4576 | 11757934_at   | turquoise | KIAA1551(KIAA1551)                                                                 | Homo sapiens |
| 4577 | 11757935_x_at | turquoise | KIAA1551(KIAA1551)                                                                 | Homo sapiens |
| 4579 | 11757938_s_at | turquoise | N-myc and STAT interactor(NMI)                                                     | Homo sapiens |
| 4580 | 11757940_at   | turquoise | placental growth factor(PGF)                                                       | Homo sapiens |
| 4581 | 11757942_s_at | turquoise | utrophin(UTRN)                                                                     | Homo sapiens |
| 4582 | 11757950_s_at | turquoise | chondroitin sulfate synthase 1(CHSY1)                                              | Homo sapiens |
| 4583 | 11757953_x_at | turquoise | tetratricopeptide repeat domain 39C(TTC39C)                                        | Homo sapiens |
| 4584 | 11757957_s_at | turquoise | SRY-box 6(SOX6)                                                                    | Homo sapiens |
| 4585 | 11757960_s_at | turquoise | ArfGAP with RhoGAP domain, ankyrin repeat and PH domain 2(ARAP2)                   | Homo sapiens |
| 4586 | 11757966_s_at | turquoise | zinc finger protein 75D(ZNF75D)                                                    | Homo sapiens |
| 4587 | 11757983_s_at | turquoise | translocation associated membrane protein 1(TRAM1)                                 | Homo sapiens |
| 4588 | 11757986_s_at | turquoise | MIS12, kinetochore complex component(MIS12)                                        | Homo sapiens |
| 4589 | 11757989_s_at | turquoise | ankyrin repeat domain 46(ANKRD46)                                                  | Homo sapiens |
| 4590 | 11758007_s_at | turquoise | YY1 associated factor 2(YAF2)                                                      | Homo sapiens |
| 4591 | 11758008_s_at | turquoise | patatin like phospholipase domain containing 4(PNPLA4)                             | Homo sapiens |
| 4592 | 11758009_s_at | turquoise | uncharacterized LOC100130460(CAND1.11)                                             | Homo sapiens |
| 4593 | 11758011_x_at | turquoise | eukaryotic translation elongation factor 1 alpha 1(EEF1A1)                         | Homo sapiens |
| 4594 | 11758014_s_at | turquoise | transforming growth factor beta receptor 1(TGFB1)                                  | Homo sapiens |
| 4595 | 11758017_x_at | turquoise | peptidyl-prolyl cis-trans isomerase A pseudogene(LOC101060363)                     | Homo sapiens |
| 4596 | 11758025_x_at | turquoise | inositol polyphosphate-5-phosphatase F(INPP5F)                                     | Homo sapiens |
| 4597 | 11758037_s_at | turquoise | myotubularin related protein 12(MTMR12)                                            | Homo sapiens |
| 4598 | 11758042_x_at | turquoise | actin beta(ACTB)                                                                   | Homo sapiens |
| 4599 | 11758043_s_at | turquoise | immediate early response 2(IER2)                                                   | Homo sapiens |
| 4600 | 11758047_s_at | turquoise | major facilitator superfamily domain containing 14A(MFSD14A)                       | Homo sapiens |
| 4602 | 11758059_s_at | turquoise | ankyrin repeat domain 49(ANKRD49)                                                  | Homo sapiens |
| 4603 | 11758067_x_at | turquoise | peptidyl-prolyl cis-trans isomerase A pseudogene(LOC101060363)                     | Homo sapiens |
| 4604 | 11758089_s_at | turquoise | hyaluronan mediated motility receptor(HMMR)                                        | Homo sapiens |
| 4605 | 11758090_s_at | turquoise | interleukin 16(IL16)                                                               | Homo sapiens |
| 4606 | 11758092_s_at | turquoise | ephrin A5(EFNA5)                                                                   | Homo sapiens |
| 4607 | 11758094_s_at | turquoise | nuclear factor of activated T-cells 2 interacting protein(NFATC2IP)                | Homo sapiens |
| 4609 | 11758113_s_at | turquoise | actin related protein 2/3 complex subunit 4(ARPC4)                                 | Homo sapiens |
| 4610 | 11758114_x_at | turquoise | src kinase associated phosphoprotein 2(SKAP2)                                      | Homo sapiens |
| 4611 | 11758126_s_at | turquoise | ELL associated factor 1(EAF1)                                                      | Homo sapiens |
| 4614 | 11758144_x_at | turquoise | heterogeneous nuclear ribonucleoprotein C (C1/C2)(HNRNPC)                          | Homo sapiens |
| 4615 | 11758148_s_at | turquoise | beta-2-microglobulin(B2M)                                                          | Homo sapiens |
| 4616 | 11758149_s_at | turquoise | Rac GTPase activating protein 1(RACGAP1)                                           | Homo sapiens |
| 4617 | 11758158_s_at | turquoise | forkhead box P1(FOXP1)                                                             | Homo sapiens |
| 4618 | 11758162_s_at | turquoise | ferredoxin 1(FDX1)                                                                 | Homo sapiens |
| 4619 | 11758176_s_at | turquoise | ATPase phospholipid transporting 10D (putative)(ATP10D)                            | Homo sapiens |
| 4620 | 11758178_s_at | turquoise | coronin 1B(CORO1B)                                                                 | Homo sapiens |
| 4621 | 11758182_x_at | turquoise | ferritin light chain(FTL)                                                          | Homo sapiens |
| 4623 | 11758191_s_at | turquoise | mex-3 RNA binding family member C(MEX3C)                                           | Homo sapiens |
| 4624 | 11758192_s_at | turquoise | beta-2-microglobulin(B2M)                                                          | Homo sapiens |
| 4625 | 11758193_x_at | turquoise | beta-2-microglobulin(B2M)                                                          | Homo sapiens |
| 4626 | 11758208_s_at | turquoise | Kruppel like factor 2(KLF2)                                                        | Homo sapiens |
| 4627 | 11758210_s_at | turquoise | tRNA methyltransferase 10C, mitochondrial RNase P subunit(TRMT10C)                 | Homo sapiens |
| 4628 | 11758215_s_at | turquoise | transducin like enhancer of split 3(TLE3)                                          | Homo sapiens |
| 4630 | 11758219_x_at | turquoise | ribonucleotide reductase regulatory subunit M2(RRM2)                               | Homo sapiens |
| 4631 | 11758222_s_at | turquoise | solute carrier family 20 member 1(SLC20A1)                                         | Homo sapiens |
| 4632 | 11758225_s_at | turquoise | IQ motif containing GTPase activating protein 2(IQGAP2)                            | Homo sapiens |
| 4633 | 11758226_s_at | turquoise | ubiquitin conjugating enzyme E2 J1(UBE2J1)                                         | Homo sapiens |
| 4634 | 11758231_x_at | turquoise | major histocompatibility complex, class II, DP alpha 1(HLA-DPA1)                   | Homo sapiens |
| 4635 | 11758238_s_at | turquoise | ATP binding cassette subfamily C member 4(ABCC4)                                   | Homo sapiens |
| 4638 | 11758259_s_at | turquoise | solute carrier organic anion transporter family member 2B1(SLCO2B1)                | Homo sapiens |
| 4639 | 11758260_x_at | turquoise | beta-2-microglobulin(B2M)                                                          | Homo sapiens |
| 4640 | 11758261_s_at | turquoise | centrosomal protein 55(CEP55)                                                      | Homo sapiens |
| 4641 | 11758263_s_at | turquoise | cytochrome b-245 beta chain(CYBB)                                                  | Homo sapiens |
| 4642 | 11758269_s_at | turquoise | methionine adenosyltransferase 2B(MAT2B)                                           | Homo sapiens |
| 4643 | 11758273_s_at | turquoise | ADP ribosylation factor 6(ARF6)                                                    | Homo sapiens |
| 4644 | 11758277_x_at | turquoise | neuroblastoma breakpoint family member 10(NBPF10)                                  | Homo sapiens |
| 4645 | 11758279_s_at | turquoise | coronin 1C(CORO1C)                                                                 | Homo sapiens |
| 4646 | 11758282_s_at | turquoise | tubulin alpha 1c(TUBA1C)                                                           | Homo sapiens |

|      |               |           |                                                                                    |              |
|------|---------------|-----------|------------------------------------------------------------------------------------|--------------|
| 4647 | 11758297_s_at | turquoise | SHC adaptor protein 1(SHC1)                                                        | Homo sapiens |
| 4648 | 11758299_a_at | turquoise | beta-2-microglobulin(B2M)                                                          | Homo sapiens |
| 4649 | 11758300_x_at | turquoise | beta-2-microglobulin(B2M)                                                          | Homo sapiens |
| 4652 | 11758327_s_at | turquoise | bromodomain adjacent to zinc finger domain 1A(BAZ1A)                               | Homo sapiens |
| 4654 | 11758331_s_at | turquoise | uncharacterized LOC101929823(LOC101929823)                                         | Homo sapiens |
| 4656 | 11758337_s_at | turquoise | adenosine deaminase(ADA)                                                           | Homo sapiens |
| 4657 | 11758340_x_at | turquoise | major histocompatibility complex, class II, DQ alpha 1(HLA-DQA1)                   | Homo sapiens |
| 4659 | 11758365_s_at | turquoise | tubulin tyrosine ligase like 8(TTL8)                                               | Homo sapiens |
| 4660 | 11758369_x_at | turquoise | major histocompatibility complex, class II, DP beta 1(HLA-DPB1)                    | Homo sapiens |
| 4661 | 11758377_s_at | turquoise | toll like receptor 1(TLR1)                                                         | Homo sapiens |
| 4662 | 11758385_s_at | turquoise | hes related family bHLH transcription factor with YRPW motif 2(HEY2)               | Homo sapiens |
| 4663 | 11758401_s_at | turquoise | zinc finger protein 148(ZNF148)                                                    | Homo sapiens |
| 4665 | 11758409_s_at | turquoise | microRNA 6805(MIR6805)                                                             | Homo sapiens |
| 4666 | 11758417_s_at | turquoise | major histocompatibility complex, class II, DP alpha 1(HLA-DPA1)                   | Homo sapiens |
| 4667 | 11758418_s_at | turquoise | family with sequence similarity 219 member B(FAM219B)                              | Homo sapiens |
| 4668 | 11758419_s_at | turquoise | transmembrane protein 106A(TMEM106A)                                               | Homo sapiens |
| 4669 | 11758447_s_at | turquoise | nucleoporin 50(NUP50)                                                              | Homo sapiens |
| 4670 | 11758448_s_at | turquoise | TMED7-TICAM2 readthrough(TMED7-TICAM2)                                             | Homo sapiens |
| 4671 | 11758478_s_at | turquoise | cell division cycle associated 7(CDCA7)                                            | Homo sapiens |
| 4672 | 11758486_s_at | turquoise | beta-site APP-cleaving enzyme 2(BACE2)                                             | Homo sapiens |
| 4673 | 11758500_s_at | turquoise | transmembrane protein 140(TMEM140)                                                 | Homo sapiens |
| 4674 | 11758501_s_at | turquoise | nicotinamide nucleotide adenyltransferase 1(NMNAT1)                                | Homo sapiens |
| 4675 | 11758527_s_at | turquoise | inositol 1,4,5-trisphosphate receptor type 2(ITPR2)                                | Homo sapiens |
| 4676 | 11758537_s_at | turquoise | tripartite motif containing 25(TRIM25)                                             | Homo sapiens |
| 4677 | 11758539_s_at | turquoise | dedicator of cytokinesis 10(DOCK10)                                                | Homo sapiens |
| 4678 | 11758542_x_at | turquoise | zinc finger CCH-type, RNA binding motif and serine/arginine rich 2(ZRSR2)          | Homo sapiens |
| 4679 | 11758547_s_at | turquoise | echinoderm microtubule associated protein like 1(EML1)                             | Homo sapiens |
| 4680 | 11758550_x_at | turquoise | transmembrane protein 268(TMEM268)                                                 | Homo sapiens |
| 4681 | 11758554_s_at | turquoise | ring finger and WD repeat domain 2(RFWD2)                                          | Homo sapiens |
| 4682 | 11758555_s_at | turquoise | G protein-coupled receptor 183(GPR183)                                             | Homo sapiens |
| 4683 | 11758557_s_at | turquoise | ZFP36 ring finger protein like 1(ZFP36L1)                                          | Homo sapiens |
| 4684 | 11758558_s_at | turquoise | ATPase sarcoplasmic/endoplasmic reticulum Ca2+ transporting 2(ATP2A2)              | Homo sapiens |
| 4686 | 11758595_at   | turquoise | neurobeachin(NBEA)                                                                 | Homo sapiens |
| 4687 | 11758607_s_at | turquoise | von Willebrand factor A domain containing 8(VWA8)                                  | Homo sapiens |
| 4688 | 11758608_s_at | turquoise | colony stimulating factor 2 receptor beta common subunit(CSF2RB)                   | Homo sapiens |
| 4689 | 11758620_s_at | turquoise | methylmalonic aciduria (cobalamin deficiency) cbIB type(MMAB)                      | Homo sapiens |
| 4690 | 11758630_s_at | turquoise | fibrinogen like 2(FGL2)                                                            | Homo sapiens |
| 4691 | 11758645_s_at | turquoise | eukaryotic translation initiation factor 4E binding protein 2(EIF4EBP2)            | Homo sapiens |
| 4692 | 11758653_s_at | turquoise | adhesion G protein-coupled receptor L4(ADGRL4)                                     | Homo sapiens |
| 4693 | 11758663_s_at | turquoise | small nucleolar RNA host gene 4(SNHG4)                                             | Homo sapiens |
| 4694 | 11758667_x_at | turquoise | tyrosine 3-monooxygenase/tryptophan 5-monooxygenase activation protein zeta(YWHAZ) | Homo sapiens |
| 4695 | 11758671_s_at | turquoise | IKAROS family zinc finger 1(IKZF1)                                                 | Homo sapiens |
| 4696 | 11758679_s_at | turquoise | microRNA 1292(MIR1292)                                                             | Homo sapiens |
| 4697 | 11758683_s_at | turquoise | jade family PHD finger 2(JADE2)                                                    | Homo sapiens |
| 4698 | 11758693_s_at | turquoise | microRNA 7703(MIR7703)                                                             | Homo sapiens |
| 4699 | 11758709_s_at | turquoise | retinol dehydrogenase 11 (all-trans/9-cis/11-cis)(RDH11)                           | Homo sapiens |
| 4700 | 11758711_x_at | turquoise | tyrosine 3-monooxygenase/tryptophan 5-monooxygenase activation protein zeta(YWHAZ) | Homo sapiens |
| 4701 | 11758716_at   | turquoise | NDUFA4, mitochondrial complex associated(NDUFA4)                                   | Homo sapiens |
| 4704 | 11758750_x_at | turquoise | tyrosine 3-monooxygenase/tryptophan 5-monooxygenase activation protein zeta(YWHAZ) | Homo sapiens |
| 4705 | 11758753_a_at | turquoise | StAR related lipid transfer domain containing 3(STARD3)                            | Homo sapiens |
| 4706 | 11758754_a_at | turquoise | Fas associated factor 1(FAF1)                                                      | Homo sapiens |
| 4708 | 11758757_at   | turquoise | alcohol dehydrogenase 5 (class III), chi polypeptide(ADH5)                         | Homo sapiens |
| 4709 | 11758771_at   | turquoise | major histocompatibility complex, class II, DP beta 1(HLA-DPB1)                    | Homo sapiens |
| 4710 | 11758772_x_at | turquoise | major histocompatibility complex, class II, DP beta 1(HLA-DPB1)                    | Homo sapiens |
| 4711 | 11758793_at   | turquoise | mitochondrial calcium uniporter dominant negative beta subunit(MCUB)               | Homo sapiens |
| 4713 | 11758821_x_at | turquoise | major histocompatibility complex, class II, DQ beta 1(HLA-DQB1)                    | Homo sapiens |
| 4714 | 11758831_at   | turquoise | RNA polymerase II subunit C(POLR2C)                                                | Homo sapiens |
| 4715 | 11758838_at   | turquoise | serine palmitoyltransferase long chain base subunit 2(SPTLC2)                      | Homo sapiens |
| 4716 | 11758854_at   | turquoise | atlastin GTPase 3(ATL3)                                                            | Homo sapiens |
| 4717 | 11758862_x_at | turquoise | poly(A) binding protein interacting protein 2B(PAIP2B)                             | Homo sapiens |
| 4718 | 11758868_at   | turquoise | Rap guanine nucleotide exchange factor 6(RAPGEF6)                                  | Homo sapiens |
| 4719 | 11758873_a_at | turquoise | heparanase(HPSE)                                                                   | Homo sapiens |
| 4720 | 11758879_s_at | turquoise | major histocompatibility complex, class I, E(HLA-E)                                | Homo sapiens |
| 4721 | 11758882_at   | turquoise | CD3d molecule(CD3D)                                                                | Homo sapiens |
| 4722 | 11758897_at   | turquoise | apolipoprotein B mRNA editing enzyme catalytic subunit 3C(APOBEC3C)                | Homo sapiens |
| 4723 | 11758898_x_at | turquoise | apolipoprotein B mRNA editing enzyme catalytic subunit 3C(APOBEC3C)                | Homo sapiens |
| 4724 | 11758901_at   | turquoise | receptor interacting serine/threonine kinase 2(RIPK2)                              | Homo sapiens |
| 4725 | 11758921_x_at | turquoise | mitochondrial ribosomal protein S17(MRPS17)                                        | Homo sapiens |
| 4726 | 11758922_at   | turquoise | syntaxin binding protein 6(STXB6)                                                  | Homo sapiens |
| 4727 | 11758933_at   | turquoise | transmembrane 4 L six family member 18(TM4SF18)                                    | Homo sapiens |
| 4728 | 11758934_x_at | turquoise | RAB27A, member RAS oncogene family(RAB27A)                                         | Homo sapiens |
| 4729 | 11758940_at   | turquoise | MOB kinase activator 1A(MOB1A)                                                     | Homo sapiens |
| 4730 | 11758941_x_at | turquoise | MOB kinase activator 1A(MOB1A)                                                     | Homo sapiens |
| 4731 | 11758942_s_at | turquoise | MOB kinase activator 1A(MOB1A)                                                     | Homo sapiens |
| 4732 | 11758947_a_at | turquoise | copine 4(CPNE4)                                                                    | Homo sapiens |
| 4733 | 11758984_at   | turquoise | zinc finger RANBP2-type containing 1(ZRANB1)                                       | Homo sapiens |
| 4734 | 11758990_x_at | turquoise | SLC9A3 regulator 1(SLC9A3R1)                                                       | Homo sapiens |
| 4735 | 11758994_at   | turquoise | fatty acyl-CoA reductase 2(FAR2)                                                   | Homo sapiens |
| 4736 | 11759022_s_at | turquoise | ELK3, ETS transcription factor(ELK3)                                               | Homo sapiens |
| 4737 | 11759049_at   | turquoise | acyl-CoA synthetase short-chain family member 3(ACSS3)                             | Homo sapiens |
| 4738 | 11759087_a_at | turquoise | NHL repeat containing 2(NHLRC2)                                                    | Homo sapiens |
| 4739 | 11759088_at   | turquoise | membrane associated ring-CH-type finger 1(MARCH1)                                  | Homo sapiens |

|      |               |           |                                                                         |              |
|------|---------------|-----------|-------------------------------------------------------------------------|--------------|
| 4740 | 11759093_s_at | turquoise | G protein subunit alpha q(GNAQ)                                         | Homo sapiens |
| 4741 | 11759094_a_at | turquoise | G protein subunit alpha q(GNAQ)                                         | Homo sapiens |
| 4742 | 11759095_at   | turquoise | G protein subunit alpha q(GNAQ)                                         | Homo sapiens |
| 4743 | 11759144_at   | turquoise | zinc finger protein 710(ZNF710)                                         | Homo sapiens |
| 4744 | 11759177_at   | turquoise | mannosidase alpha class 1A member 1(MAN1A1)                             | Homo sapiens |
| 4746 | 11759184_at   | turquoise | plexin C1(PLXNC1)                                                       | Homo sapiens |
| 4747 | 11759187_at   | turquoise | TNF alpha induced protein 8 like 1(TNFAIP8L1)                           | Homo sapiens |
| 4749 | 11759292_at   | turquoise | family with sequence similarity 63 member A(FAM63A)                     | Homo sapiens |
| 4750 | 11759294_s_at | turquoise | lysine methyltransferase 2A(KMT2A)                                      | Homo sapiens |
| 4751 | 11759296_at   | turquoise | mitogen-activated protein kinase kinase kinase 2(MAP3K2)                | Homo sapiens |
| 4752 | 11759300_s_at | turquoise | A-kinase anchoring protein 10(AKAP10)                                   | Homo sapiens |
| 4753 | 11759320_at   | turquoise | myelin protein zero like 3(MPZL3)                                       | Homo sapiens |
| 4754 | 11759328_at   | turquoise | kinetochore scaffold 1(KNL1)                                            | Homo sapiens |
| 4755 | 11759347_x_at | turquoise | TXK tyrosine kinase(TXK)                                                | Homo sapiens |
| 4756 | 11759352_a_at | turquoise | Fc receptor like 3(FCRL3)                                               | Homo sapiens |
| 4757 | 11759414_at   | turquoise | glycine cleavage system protein H(GCSH)                                 | Homo sapiens |
| 4759 | 11759444_x_at | turquoise | BCL2 associated X, apoptosis regulator(BAX)                             | Homo sapiens |
| 4760 | 11759477_x_at | turquoise | ADAM metalloproteinase with thrombospondin type 1 motif 15(ADAMTS15)    | Homo sapiens |
| 4761 | 11759496_at   | turquoise | carbohydrate sulfotransferase 11(CHST11)                                | Homo sapiens |
| 4762 | 11759497_at   | turquoise | carbohydrate sulfotransferase 11(CHST11)                                | Homo sapiens |
| 4763 | 11759498_at   | turquoise | family with sequence similarity 49 member A(FAM49A)                     | Homo sapiens |
| 4764 | 11759499_at   | turquoise | family with sequence similarity 49 member A(FAM49A)                     | Homo sapiens |
| 4765 | 11759502_at   | turquoise | TNF receptor associated factor 3(TRAF3)                                 | Homo sapiens |
| 4766 | 11759511_at   | turquoise | motile sperm domain containing 2(MOSPD2)                                | Homo sapiens |
| 4767 | 11759512_x_at | turquoise | CWC25 spliceosome associated protein homolog(CWC25)                     | Homo sapiens |
| 4771 | 11759550_at   | turquoise | ZNFX1 antisense RNA 1(ZFAS1)                                            | Homo sapiens |
| 4773 | 11759566_a_at | turquoise | N-acetylneuraminate pyruvate lyase(NPL)                                 | Homo sapiens |
| 4774 | 11759569_a_at | turquoise | CDK5 regulatory subunit associated protein 3(CDK5RAP3)                  | Homo sapiens |
| 4775 | 11759572_a_at | turquoise | staufen double-stranded RNA binding protein 2(STAU2)                    | Homo sapiens |
| 4776 | 11759573_at   | turquoise | meningioma expressed antigen 5 (hyaluronidase)(MGEA5)                   | Homo sapiens |
| 4778 | 11759581_x_at | turquoise | major histocompatibility complex, class I, B(HLA-B)                     | Homo sapiens |
| 4779 | 11759587_at   | turquoise | HtrA serine peptidase 3(HTRA3)                                          | Homo sapiens |
| 4780 | 11759615_x_at | turquoise | pre-mRNA processing factor 38B(PRP38B)                                  | Homo sapiens |
| 4781 | 11759619_at   | turquoise | trafficking protein particle complex 10(TRAPPC10)                       | Homo sapiens |
| 4782 | 11759622_s_at | turquoise | DeX-D-box helicase 21(DDX21)                                            | Homo sapiens |
| 4783 | 11759627_at   | turquoise | microRNA 6125(MIR6125)                                                  | Homo sapiens |
| 4784 | 11759629_a_at | turquoise | T cell receptor delta variable 2(TRDV2)                                 | Homo sapiens |
| 4785 | 11759635_x_at | turquoise | THO complex 2(THOC2)                                                    | Homo sapiens |
| 4786 | 11759642_x_at | turquoise | major histocompatibility complex, class II, DR beta 1(HLA-DRB1)         | Homo sapiens |
| 4789 | 11759657_at   | turquoise | target of myb1 like 1 membrane trafficking protein(TOM1L1)              | Homo sapiens |
| 4790 | 11759663_x_at | turquoise | SP100 nuclear antigen(SP100)                                            | Homo sapiens |
| 4791 | 11759666_x_at | turquoise | major histocompatibility complex, class II, DP beta 1(HLA-DPB1)         | Homo sapiens |
| 4792 | 11759671_s_at | turquoise | potassium calcium-activated channel subfamily M alpha 1(KCNMA1)         | Homo sapiens |
| 4793 | 11759678_at   | turquoise | RAB12, member RAS oncogene family(RAB12)                                | Homo sapiens |
| 4795 | 11759729_a_at | turquoise | tetratricopeptide repeat domain 14(TTC14)                               | Homo sapiens |
| 4796 | 11759759_s_at | turquoise | cyclin L1(CCNL1)                                                        | Homo sapiens |
| 4797 | 11759766_at   | turquoise | major histocompatibility complex, class I-related(MR1)                  | Homo sapiens |
| 4798 | 11759767_x_at | turquoise | major histocompatibility complex, class I-related(MR1)                  | Homo sapiens |
| 4801 | 11759828_s_at | turquoise | SP100 nuclear antigen(SP100)                                            | Homo sapiens |
| 4802 | 11759833_at   | turquoise | NADH:ubiquinone oxidoreductase core subunit S7(NDUFS7)                  | Homo sapiens |
| 4804 | 11759854_x_at | turquoise | ribosomal protein S27a(RPS27A)                                          | Homo sapiens |
| 4805 | 11759866_at   | turquoise | NA                                                                      | NA           |
| 4806 | 11759922_a_at | turquoise | par-3 family cell polarity regulator(PARD3)                             | Homo sapiens |
| 4807 | 11759939_x_at | turquoise | uncharacterized LOC100131541(LOC100131541)                              | Homo sapiens |
| 4808 | 11759973_at   | turquoise | prenyl (decaprenyl) diphosphate synthase, subunit 1(PDSS1)              | Homo sapiens |
| 4809 | 11760005_x_at | turquoise | DnaJ heat shock protein family (Hsp40) member A1(DNAJA1)                | Homo sapiens |
| 4810 | 11760009_at   | turquoise | NA                                                                      | NA           |
| 4811 | 11760018_at   | turquoise | C-type lectin domain family 10 member A(CLEC10A)                        | Homo sapiens |
| 4812 | 11760037_a_at | turquoise | glutaminase(GLS)                                                        | Homo sapiens |
| 4813 | 11760038_a_at | turquoise | glutaminase(GLS)                                                        | Homo sapiens |
| 4814 | 11760085_s_at | turquoise | heterogeneous nuclear ribonucleoprotein A1(HNRNPA1)                     | Homo sapiens |
| 4815 | 11760103_at   | turquoise | protein kinase cAMP-dependent type II regulatory subunit alpha(PRKAR2A) | Homo sapiens |
| 4816 | 11760124_a_at | turquoise | Kruppel like factor 6(KLF6)                                             | Homo sapiens |
| 4818 | 11760143_at   | turquoise | major histocompatibility complex, class I, F(HLA-F)                     | Homo sapiens |
| 4819 | 11760144_x_at | turquoise | major histocompatibility complex, class I, F(HLA-F)                     | Homo sapiens |
| 4820 | 11760156_at   | turquoise | Enah/Vasp-like(EVL)                                                     | Homo sapiens |
| 4821 | 11760198_at   | turquoise | eukaryotic translation initiation factor 4E family member 2(EIF4E2)     | Homo sapiens |
| 4822 | 11760211_at   | turquoise | CD48 molecule(CD48)                                                     | Homo sapiens |
| 4823 | 11760221_at   | turquoise | caspase 4(CASP4)                                                        | Homo sapiens |
| 4824 | 11760222_x_at | turquoise | caspase 4(CASP4)                                                        | Homo sapiens |
| 4825 | 11760244_a_at | turquoise | caspase recruitment domain family member 8(CARD8)                       | Homo sapiens |
| 4826 | 11760280_a_at | turquoise | epidermal growth factor receptor pathway substrate 15 like 1(EPS15L1)   | Homo sapiens |
| 4827 | 11760356_at   | turquoise | peptidase, mitochondrial processing beta subunit(PMPCB)                 | Homo sapiens |
| 4828 | 11760380_x_at | turquoise | septin 6(SEPT6)                                                         | Homo sapiens |
| 4829 | 11760387_at   | turquoise | interleukin 16(IL16)                                                    | Homo sapiens |
| 4830 | 11760406_x_at | turquoise | major histocompatibility complex, class I, G(HLA-G)                     | Homo sapiens |
| 4831 | 11760426_a_at | turquoise | epidermal growth factor receptor pathway substrate 15 like 1(EPS15L1)   | Homo sapiens |
| 4832 | 11760444_x_at | turquoise | major histocompatibility complex, class I, C(HLA-C)                     | Homo sapiens |
| 4833 | 11760475_at   | turquoise | serine/threonine kinase 4(STK4)                                         | Homo sapiens |
| 4835 | 11760584_a_at | turquoise | YME1 like 1 ATPase(YME1L1)                                              | Homo sapiens |
| 4836 | 11760710_a_at | turquoise | membrane spanning 4-domains A6A(MS4A6A)                                 | Homo sapiens |
| 4837 | 11760776_a_at | turquoise | dermokine(DMKN)                                                         | Homo sapiens |

|      |               |           |                                                                              |              |
|------|---------------|-----------|------------------------------------------------------------------------------|--------------|
| 4839 | 11760822_at   | turquoise | sodium voltage-gated channel beta subunit 1(SCN1B)                           | Homo sapiens |
| 4840 | 11760850_X_at | turquoise | PAT1, crumbs cell polarity complex component(PAT1)                           | Homo sapiens |
| 4841 | 11760878_X_at | turquoise | major histocompatibility complex, class II, DP beta 1(HLA-DPB1)              | Homo sapiens |
| 4842 | 11760881_X_at | turquoise | transcription termination factor 2(TTF2)                                     | Homo sapiens |
| 4843 | 11760902_X_at | turquoise | napsin B aspartic peptidase, pseudogene(NAPSB)                               | Homo sapiens |
| 4845 | 11760994_at   | turquoise | tryptophanyl-tRNA synthetase(WARS)                                           | Homo sapiens |
| 4847 | 11761116_a_at | turquoise | family with sequence similarity 65 member B(FAM65B)                          | Homo sapiens |
| 4848 | 11761194_a_at | turquoise | trans-golgi network protein 2(TGOLN2)                                        | Homo sapiens |
| 4849 | 11761343_a_at | turquoise | ADAM metallopeptidase domain 8(ADAM8)                                        | Homo sapiens |
| 4850 | 11761390_a_at | turquoise | ankyrin repeat domain 10(ANKRD10)                                            | Homo sapiens |
| 4851 | 11761400_a_at | turquoise | nucleolar protein interacting with the FHA domain of MKI67(NIFK)             | Homo sapiens |
| 4852 | 11761418_X_at | turquoise | interleukin 23 subunit alpha(IL23A)                                          | Homo sapiens |
| 4853 | 11761427_at   | turquoise | dedicator of cytokinesis 8(DOCK8)                                            | Homo sapiens |
| 4855 | 11761465_at   | turquoise | NA                                                                           | NA           |
| 4857 | 11761506_at   | turquoise | malic enzyme 3(ME3)                                                          | Homo sapiens |
| 4858 | 11761525_a_at | turquoise | interleukin 23 subunit alpha(IL23A)                                          | Homo sapiens |
| 4859 | 11761604_X_at | turquoise | RNA binding protein, fox-1 homolog 1(RBFOX1)                                 | Homo sapiens |
| 4860 | 11761671_a_at | turquoise | ETS variant 7(ETV7)                                                          | Homo sapiens |
| 4861 | 11761683_X_at | turquoise | pyrin and HIN domain family member 1(PYHIN1)                                 | Homo sapiens |
| 4862 | 11761703_s_at | turquoise | DnaJ heat shock protein family (Hsp40) member A1(DNAJA1)                     | Homo sapiens |
| 4863 | 11761727_X_at | turquoise | aquaporin 7(AQP7)                                                            | Homo sapiens |
| 4864 | 11761758_at   | turquoise | proteasome subunit beta 9(PSMB9)                                             | Homo sapiens |
| 4865 | 11761790_X_at | turquoise | YME1 like 1 ATPase(YME1L1)                                                   | Homo sapiens |
| 4866 | 11761796_at   | turquoise | calcitonin receptor like receptor(CALCRL)                                    | Homo sapiens |
| 4867 | 11761918_X_at | turquoise | T cell receptor beta constant 1(TRBC1)                                       | Homo sapiens |
| 4868 | 11761959_X_at | turquoise | T cell receptor delta variable 2(TRDV2)                                      | Homo sapiens |
| 4869 | 11761960_X_at | turquoise | T cell receptor delta variable 2(TRDV2)                                      | Homo sapiens |
| 4870 | 11762018_at   | turquoise | DNA cross-link repair 1C(DCLRE1C)                                            | Homo sapiens |
| 4871 | 11762038_at   | turquoise | zinc finger protein 844(ZNF844)                                              | Homo sapiens |
| 4872 | 11762069_a_at | turquoise | septin 6(SEPT6)                                                              | Homo sapiens |
| 4875 | 11762119_X_at | turquoise | major histocompatibility complex, class I, A(HLA-A)                          | Homo sapiens |
| 4876 | 11762140_a_at | turquoise | butyrophilin like 9(BTNL9)                                                   | Homo sapiens |
| 4877 | 11762150_X_at | turquoise | major histocompatibility complex, class I, A(HLA-A)                          | Homo sapiens |
| 4878 | 11762172_X_at | turquoise | ETS variant 7(ETV7)                                                          | Homo sapiens |
| 4879 | 11762266_X_at | turquoise | interleukin 7 receptor(IL7R)                                                 | Homo sapiens |
| 4880 | 11762274_X_at | turquoise | major histocompatibility complex, class II, DM beta(HLA-DMB)                 | Homo sapiens |
| 4882 | 11762282_X_at | turquoise | major histocompatibility complex, class I, A(HLA-A)                          | Homo sapiens |
| 4883 | 11762287_X_at | turquoise | interleukin 23 subunit alpha(IL23A)                                          | Homo sapiens |
| 4884 | 11762294_X_at | turquoise | T cell receptor beta constant 1(TRBC1)                                       | Homo sapiens |
| 4885 | 11762313_X_at | turquoise | enoyl-CoA hydratase domain containing 2(ECHDC2)                              | Homo sapiens |
| 4886 | 11762318_X_at | turquoise | interleukin 23 subunit alpha(IL23A)                                          | Homo sapiens |
| 4887 | 11762339_X_at | turquoise | aldo-keto reductase family 7 member A2(AKR7A2)                               | Homo sapiens |
| 4888 | 11762366_s_at | turquoise | recombination signal binding protein for immunoglobulin kappa J region(RBP1) | Homo sapiens |
| 4889 | 11762406_s_at | turquoise | guanylate binding protein 2(GBP2)                                            | Homo sapiens |
| 4890 | 11762432_a_at | turquoise | WD repeat domain 31(WDR31)                                                   | Homo sapiens |
| 4891 | 11762456_at   | turquoise | NA                                                                           | NA           |
| 4892 | 11762480_X_at | turquoise | SP140 nuclear body protein(SP140)                                            | Homo sapiens |
| 4893 | 11762486_X_at | turquoise | fucosyltransferase 6(FUT6)                                                   | Homo sapiens |
| 4894 | 11762641_X_at | turquoise | major histocompatibility complex, class II, DQ beta 1(HLA-DQB1)              | Homo sapiens |
| 4895 | 11762736_at   | turquoise | butyrophilin like 9(BTNL9)                                                   | Homo sapiens |
| 4896 | 11762785_X_at | turquoise | actin gamma 1(ACTG1)                                                         | Homo sapiens |
| 4897 | 11762851_at   | turquoise | major histocompatibility complex, class I, B(HLA-B)                          | Homo sapiens |
| 4898 | 11762908_X_at | turquoise | TNF receptor superfamily member 14(TNFRSF14)                                 | Homo sapiens |
| 4899 | 11762936_X_at | turquoise | aquaporin 7(AQP7)                                                            | Homo sapiens |
| 4900 | 11762940_X_at | turquoise | major histocompatibility complex, class I, C(HLA-C)                          | Homo sapiens |
| 4901 | 11762993_X_at | turquoise | YME1 like 1 ATPase(YME1L1)                                                   | Homo sapiens |
| 4902 | 11762996_X_at | turquoise | YME1 like 1 ATPase(YME1L1)                                                   | Homo sapiens |
| 4903 | 11762998_X_at | turquoise | YME1 like 1 ATPase(YME1L1)                                                   | Homo sapiens |
| 4907 | 11763159_at   | turquoise | YME1 like 1 ATPase(YME1L1)                                                   | Homo sapiens |
| 4908 | 11763182_at   | turquoise | CCR4-NOT transcription complex subunit 9(CNOT9)                              | Homo sapiens |
| 4909 | 11763184_at   | turquoise | insulin degrading enzyme(IDE)                                                | Homo sapiens |
| 4910 | 11763186_at   | turquoise | caspase 1(CASP1)                                                             | Homo sapiens |
| 4911 | 11763196_at   | turquoise | dymeclin(DYM)                                                                | Homo sapiens |
| 4912 | 11763197_X_at | turquoise | dymeclin(DYM)                                                                | Homo sapiens |
| 4913 | 11763201_at   | turquoise | family with sequence similarity 65 member B(FAM65B)                          | Homo sapiens |
| 4914 | 11763202_X_at | turquoise | family with sequence similarity 65 member B(FAM65B)                          | Homo sapiens |
| 4915 | 11763215_a_at | turquoise | dermokine(DMKN)                                                              | Homo sapiens |
| 4917 | 11763233_X_at | turquoise | T cell receptor delta variable 2(TRDV2)                                      | Homo sapiens |
| 4918 | 11763246_X_at | turquoise | major histocompatibility complex, class II, DQ beta 1(HLA-DQB1)              | Homo sapiens |
| 4921 | 11763271_at   | turquoise | peroxisomal biogenesis factor 11 alpha(PEX11A)                               | Homo sapiens |
| 4922 | 11763274_a_at | turquoise | signal induced proliferation associated 1 like 1(SIPA1L1)                    | Homo sapiens |
| 4923 | 11763307_s_at | turquoise | nuclear factor of activated T-cells 2(NFATC2)                                | Homo sapiens |
| 4924 | 11763310_a_at | turquoise | microRNA 21(MIR21)                                                           | Homo sapiens |
| 4925 | 11763314_s_at | turquoise | ADP ribosylation factor like GTPase 4C(ARL4C)                                | Homo sapiens |
| 4926 | 11763320_X_at | turquoise | glutaminase(GLS)                                                             | Homo sapiens |
| 4927 | 11763322_s_at | turquoise | casein kinase 2 alpha 2(CSNK2A2)                                             | Homo sapiens |
| 4928 | 11763329_a_at | turquoise | docking protein 1(DOK1)                                                      | Homo sapiens |
| 4930 | 11763336_at   | turquoise | uncharacterized protein DKFZp586i1420(DKFZP586i1420)                         | Homo sapiens |
| 4931 | 11763353_at   | turquoise | NA                                                                           | NA           |
| 4932 | 11763357_a_at | turquoise | transmembrane protein 170A(TMEM170A)                                         | Homo sapiens |
| 4933 | 11763359_at   | turquoise | NA                                                                           | NA           |
| 4934 | 11763365_X_at | turquoise | caspase recruitment domain family member 8(CARD8)                            | Homo sapiens |

|      |                             |           |                                                                              |              |
|------|-----------------------------|-----------|------------------------------------------------------------------------------|--------------|
| 4935 | 11763367_at                 | turquoise | nucleic acid binding protein 1(NABP1)                                        | Homo sapiens |
| 4936 | 11763382_a_at               | turquoise | uncharacterized LOC101928143(LOC101928143)                                   | Homo sapiens |
| 4937 | 11763403_a_at               | turquoise | CUGBP, Elav-like family member 1(CELF1)                                      | Homo sapiens |
| 4939 | 11763426_a_at               | turquoise | TRAF3 interacting protein 3(TRAF3IP3)                                        | Homo sapiens |
| 4940 | 11763446_s_at               | turquoise | T cell receptor delta variable 3(TRDV3)                                      | Homo sapiens |
| 4941 | 11763447_x_at               | turquoise | YME1 like 1 ATPase(YME1L1)                                                   | Homo sapiens |
| 4942 | 11763472_x_at               | turquoise | zinc finger CCCH-type containing 12D(ZC3H12D)                                | Homo sapiens |
| 4943 | 11763494_x_at               | turquoise | FERM domain containing 8(FRMD8)                                              | Homo sapiens |
| 4946 | 11763556_at                 | turquoise | eukaryotic translation initiation factor 4A1(EIF4A1)                         | Homo sapiens |
| 4947 | 11763557_x_at               | turquoise | T cell receptor beta constant 1(TRBC1)                                       | Homo sapiens |
| 4948 | 11763585_s_at               | turquoise | thymopoietin(TMPO)                                                           | Homo sapiens |
| 4949 | 11763605_a_at               | turquoise | Wnt family member 11(WNT11)                                                  | Homo sapiens |
| 4950 | 11763606_a_at               | turquoise | vav guanine nucleotide exchange factor 1(VAV1)                               | Homo sapiens |
| 4955 | 11763693_a_at               | turquoise | glutaminase(GLS)                                                             | Homo sapiens |
| 4957 | 11763704_a_at               | turquoise | spermidine/spermine N1-acetyltransferase 1(SAT1)                             | Homo sapiens |
| 4958 | 11763715_a_at               | turquoise | granulysin(GNLY)                                                             | Homo sapiens |
| 4959 | 11763726_a_at               | turquoise | small nucleolar RNA, H/ACA box 70(SNORA70)                                   | Homo sapiens |
| 4960 | 11763735_a_at               | turquoise | Fc receptor like 3(FCRL3)                                                    | Homo sapiens |
| 4961 | 11763756_x_at               | turquoise | granulysin(GNLY)                                                             | Homo sapiens |
| 4962 | 11763776_a_at               | turquoise | thymocyte selection associated family member 2(THEMIS2)                      | Homo sapiens |
| 4963 | 11763862_s_at               | turquoise | SH3 domain binding glutamate rich protein like(SH3BGRL)                      | Homo sapiens |
| 4965 | 11763986_a_at               | turquoise | apolipoprotein L1(APOL1)                                                     | Homo sapiens |
| 4967 | 11764017_x_at               | turquoise | aph-1 homolog A, gamma-secretase subunit(APH1A)                              | Homo sapiens |
| 4968 | 11764037_s_at               | turquoise | DnaJ heat shock protein family (Hsp40) member A1(DNAJA1)                     | Homo sapiens |
| 4970 | 11764053_a_at               | turquoise | recombination signal binding protein for immunoglobulin kappa J region(RBPJ) | Homo sapiens |
| 4971 | 11764085_at                 | turquoise | NA                                                                           | NA           |
| 4973 | 11764146_s_at               | turquoise | motile sperm domain containing 2(MOSPD2)                                     | Homo sapiens |
| 4974 | 11764172_a_at               | turquoise | uncharacterized LOC102724880(LOC102724880)                                   | Homo sapiens |
| 4975 | 11764239_s_at               | turquoise | transforming growth factor beta regulator 1(TBRG1)                           | Homo sapiens |
| 4976 | 11764248_s_at               | turquoise | low density lipoprotein receptor class A domain containing 3(LDLRAD3)        | Homo sapiens |
| 4977 | 200003_PM_s_at              | turquoise | microRNA 6805(MIR6805)                                                       | Homo sapiens |
| 4978 | 200009_PM_at                | turquoise | GDP dissociation inhibitor 2(GDI2)                                           | Homo sapiens |
| 4979 | 200011_PM_s_at              | turquoise | ADP ribosylation factor 3(ARF3)                                              | Homo sapiens |
| 4980 | 200015_PM_s_at              | turquoise | septin 2(SEPT2)                                                              | Homo sapiens |
| 4981 | 200021_PM_at                | turquoise | cofilin 1(CFL1)                                                              | Homo sapiens |
| 4983 | 200033_PM_at                | turquoise | microRNA 3064(MIR3064)                                                       | Homo sapiens |
| 4984 | 200037_PM_s_at              | turquoise | chromobox 3(CBX3)                                                            | Homo sapiens |
| 4985 | 200044_PM_at                | turquoise | glutamyl-tRNA amidotransferase subunit C(GATC)                               | Homo sapiens |
| 4986 | 200057_PM_s_at              | turquoise | non-POU domain containing, octamer-binding(NONO)                             | Homo sapiens |
| 4987 | 200059_PM_s_at              | turquoise | ras homolog family member A(RHOA)                                            | Homo sapiens |
| 4989 | AFFX-BkGr-GC17_at           | turquoise | NA                                                                           | NA           |
| 4990 | AFFX-BkGr-GC18_at           | turquoise | NA                                                                           | NA           |
| 4991 | AFFX-BkGr-GC19_at           | turquoise | NA                                                                           | NA           |
| 4992 | AFFX-BkGr-GC20_at           | turquoise | NA                                                                           | NA           |
| 4993 | AFFX-BkGr-GC21_at           | turquoise | NA                                                                           | NA           |
| 4994 | AFFX-BkGr-GC22_at           | turquoise | NA                                                                           | NA           |
| 4995 | AFFX-HSAC07/X00351_3_at     | turquoise | actin beta(ACTB)                                                             | Homo sapiens |
| 4996 | AFFX-HSAC07/X00351_M_at     | turquoise | actin beta(ACTB)                                                             | Homo sapiens |
| 4997 | AFFX-HUMISGF3A/M97935_3_at  | turquoise | signal transducer and activator of transcription 1(STAT1)                    | Homo sapiens |
| 4998 | AFFX-HUMISGF3A/M97935_5_at  | turquoise | signal transducer and activator of transcription 1(STAT1)                    | Homo sapiens |
| 4999 | AFFX-HUMISGF3A/M97935_MA_at | turquoise | signal transducer and activator of transcription 1(STAT1)                    | Homo sapiens |
| 5000 | AFFX-HUMISGF3A/M97935_MB_at | turquoise | signal transducer and activator of transcription 1(STAT1)                    | Homo sapiens |

| Yellow Module |               | hcolor | Name                                                      | Species      |
|---------------|---------------|--------|-----------------------------------------------------------|--------------|
|               | gene          |        |                                                           |              |
| 1553          | 11726153_at   | yellow | POU class 2 associating factor 1(POU2AF1)                 | Homo sapiens |
| 2474          | 11735989_s_at | yellow | joining chain of multimeric IgA and IgM(JCHAIN)           | Homo sapiens |
| 2475          | 11735990_x_at | yellow | joining chain of multimeric IgA and IgM(JCHAIN)           | Homo sapiens |
| 3264          | 11745244_x_at | yellow | microRNA 8071-1(MIR8071-1)                                | Homo sapiens |
| 3710          | 11750231_x_at | yellow | microRNA 8071-1(MIR8071-1)                                | Homo sapiens |
| 3970          | 11753832_x_at | yellow | immunoglobulin kappa constant(IGKC)                       | Homo sapiens |
| 3999          | 11754032_x_at | yellow | microRNA 8071-1(MIR8071-1)                                | Homo sapiens |
| 4008          | 11754145_x_at | yellow | NA                                                        | NA           |
| 4198          | 11755382_x_at | yellow | immunoglobulin lambda variable 1-44(IGLV1-44)             | Homo sapiens |
| 4370          | 11756658_a_at | yellow | marginal zone B and B1 cell specific protein(MZB1)        | Homo sapiens |
| 4788          | 11759652_x_at | yellow | immunoglobulin kappa constant(IGKC)                       | Homo sapiens |
| 4799          | 11759815_a_at | yellow | immunoglobulin heavy constant mu(IGHM)                    | Homo sapiens |
| 4800          | 11759816_x_at | yellow | immunoglobulin heavy constant mu(IGHM)                    | Homo sapiens |
| 4803          | 11759852_x_at | yellow | microRNA 8071-1(MIR8071-1)                                | Homo sapiens |
| 4817          | 11760137_x_at | yellow | immunoglobulin heavy constant alpha 1(IGHA1)              | Homo sapiens |
| 4838          | 11760819_x_at | yellow | immunoglobulin heavy variable 4-31(IGHV4-31)              | Homo sapiens |
| 4844          | 11760929_x_at | yellow | microRNA 8071-1(MIR8071-1)                                | Homo sapiens |
| 4856          | 11761467_x_at | yellow | immunoglobulin heavy constant gamma 3 (G3m marker)(IGHG3) | Homo sapiens |
| 4873          | 11762091_x_at | yellow | immunoglobulin heavy locus(IGH)                           | Homo sapiens |
| 4874          | 11762099_x_at | yellow | immunoglobulin heavy constant alpha 1(IGHA1)              | Homo sapiens |
| 4906          | 11763144_x_at | yellow | immunoglobulin kappa constant(IGKC)                       | Homo sapiens |
| 4916          | 11763222_x_at | yellow | immunoglobulin kappa constant(IGKC)                       | Homo sapiens |
| 4919          | 11763249_x_at | yellow | immunoglobulin heavy locus(IGH)                           | Homo sapiens |
| 4920          | 11763253_x_at | yellow | NA                                                        | NA           |
| 4938          | 11763408_x_at | yellow | ankyrin repeat domain 36B pseudogene 2(ANKRD36BP2)        | Homo sapiens |
| 4945          | 11763550_x_at | yellow | immunoglobulin kappa constant(IGKC)                       | Homo sapiens |
| 4952          | 11763640_x_at | yellow | immunoglobulin kappa constant(IGKC)                       | Homo sapiens |
| 4953          | 11763663_x_at | yellow | immunoglobulin kappa constant(IGKC)                       | Homo sapiens |
| 4954          | 11763684_x_at | yellow | immunoglobulin kappa constant(IGKC)                       | Homo sapiens |
| 4969          | 11764046_x_at | yellow | immunoglobulin heavy constant mu(IGHM)                    | Homo sapiens |
| 4972          | 11764130_s_at | yellow | immunoglobulin heavy locus(IGH)                           | Homo sapiens |

## Blue Module

| gene               | hcolor | Name                                                                           | Species      |
|--------------------|--------|--------------------------------------------------------------------------------|--------------|
| 6 11715320_s_at    | blue   | titin(TTN)                                                                     | Homo sapiens |
| 7 11715339_at      | blue   | titin(TTN)                                                                     | Homo sapiens |
| 20 11715409_a_at   | blue   | peroxiredoxin 2(PRX2)                                                          | Homo sapiens |
| 21 11715410_x_at   | blue   | peroxiredoxin 2(PRX2)                                                          | Homo sapiens |
| 38 11715498_a_at   | blue   | OXA1L, mitochondrial inner membrane protein(OXA1L)                             | Homo sapiens |
| 49 11715620_a_at   | blue   | crystallin alpha B(CRYAB)                                                      | Homo sapiens |
| 55 11715655_s_at   | blue   | voltage dependent anion channel 1(VDAC1)                                       | Homo sapiens |
| 56 11715656_at     | blue   | cytochrome c oxidase subunit 5A(COX5A)                                         | Homo sapiens |
| 90 11715881_a_at   | blue   | death associated protein 3(DAP3)                                               | Homo sapiens |
| 91 11715883_x_at   | blue   | death associated protein 3(DAP3)                                               | Homo sapiens |
| 110 11715973_a_at  | blue   | mitochondrial fission regulator 1 like(MTFR1L)                                 | Homo sapiens |
| 145 11716202_a_at  | blue   | phosphofructokinase, muscle(PFKM)                                              | Homo sapiens |
| 146 11716205_a_at  | blue   | NADH:ubiquinone oxidoreductase subunit A8(NDUFA8)                              | Homo sapiens |
| 147 11716211_a_at  | blue   | 3-hydroxyisobutyrate dehydrogenase(HIBADH)                                     | Homo sapiens |
| 148 11716212_a_at  | blue   | 3-hydroxyisobutyrate dehydrogenase(HIBADH)                                     | Homo sapiens |
| 172 11716380_a_at  | blue   | mitochondrial pyruvate carrier 2(MPC2)                                         | Homo sapiens |
| 173 11716381_x_at  | blue   | mitochondrial pyruvate carrier 2(MPC2)                                         | Homo sapiens |
| 176 11716392_s_at  | blue   | alcohol dehydrogenase 5 (class III), chi polypeptide(ADH5)                     | Homo sapiens |
| 183 11716448_a_at  | blue   | nudix hydrolase 9(NUDT9)                                                       | Homo sapiens |
| 187 11716468_s_at  | blue   | iron-sulfur cluster assembly 1(ISCA1)                                          | Homo sapiens |
| 197 11716562_at    | blue   | aminoacyl tRNA synthetase complex interacting multifunctional protein 2(AIMP2) | Homo sapiens |
| 251 11716859_a_at  | blue   | electron transfer flavoprotein alpha subunit(ETFA)                             | Homo sapiens |
| 304 11717297_at    | blue   | leucine rich pentatricopeptide repeat containing(LRPPRC)                       | Homo sapiens |
| 329 11717430_s_at  | blue   | cytochrome c oxidase subunit 7A1(COX7A1)                                       | Homo sapiens |
| 338 11717483_a_at  | blue   | pyruvate dehydrogenase (lipoamide) alpha 1(PDHA1)                              | Homo sapiens |
| 339 11717484_x_at  | blue   | pyruvate dehydrogenase (lipoamide) alpha 1(PDHA1)                              | Homo sapiens |
| 341 11717499_at    | blue   | solute carrier family 25 member 36(SLC25A36)                                   | Homo sapiens |
| 407 11717936_a_at  | blue   | endoplasmic reticulum metalloproteinase 1(ERMP1)                               | Homo sapiens |
| 426 11718035_at    | blue   | peptidylprolyl isomerase like 1(PPI1)                                          | Homo sapiens |
| 442 11718117_a_at  | blue   | NFS1, cysteine desulfurase(NFS1)                                               | Homo sapiens |
| 454 11718207_a_at  | blue   | coenzyme Q6, monooxygenase(COQ6)                                               | Homo sapiens |
| 455 11718227_a_at  | blue   | BCS1 homolog, ubiquinol-cytochrome c reductase complex chaperone(BCS1L)        | Homo sapiens |
| 458 11718239_s_at  | blue   | cell cycle associated protein 1(CAPRIN1)                                       | Homo sapiens |
| 469 11718312_at    | blue   | acyl-CoA dehydrogenase, short/branched chain(ACADS)                            | Homo sapiens |
| 477 11718383_a_at  | blue   | apoptosis inducing factor, mitochondria associated 1(AIFM1)                    | Homo sapiens |
| 485 11718426_a_at  | blue   | hydroxysteroid dehydrogenase like 2(HSDL2)                                     | Homo sapiens |
| 507 11718580_a_at  | blue   | coenzyme Q9(COQ9)                                                              | Homo sapiens |
| 523 11718669_x_at  | blue   | mediator complex subunit 9(MED9)                                               | Homo sapiens |
| 543 11718837_x_at  | blue   | NADH:ubiquinone oxidoreductase core subunit S2(NDUFS2)                         | Homo sapiens |
| 545 11718854_a_at  | blue   | mitochondrial ribosomal protein S30(MRPS30)                                    | Homo sapiens |
| 562 11718948_a_at  | blue   | membrane palmitoylated protein 5(MPP5)                                         | Homo sapiens |
| 579 11719065_x_at  | blue   | glyceronephosphate O-acyltransferase(GNPAT)                                    | Homo sapiens |
| 584 11719115_a_at  | blue   | glutamic-oxaloacetic transaminase 2(GOT2)                                      | Homo sapiens |
| 585 11719116_a_at  | blue   | glutamic-oxaloacetic transaminase 2(GOT2)                                      | Homo sapiens |
| 586 11719117_x_at  | blue   | glutamic-oxaloacetic transaminase 2(GOT2)                                      | Homo sapiens |
| 602 11719224_s_at  | blue   | coenzyme Q10A(COQ10A)                                                          | Homo sapiens |
| 619 11719359_a_at  | blue   | aldehyde dehydrogenase 5 family member A1(ALDH5A1)                             | Homo sapiens |
| 631 11719425_a_at  | blue   | family with sequence similarity 220 member A(FAM220A)                          | Homo sapiens |
| 692 11719876_at    | blue   | creatine kinase, mitochondrial 2(CKMT2)                                        | Homo sapiens |
| 743 11720191_s_at  | blue   | NADH:ubiquinone oxidoreductase complex assembly factor 4(NDUFA4)               | Homo sapiens |
| 757 11720238_at    | blue   | mitogen-activated protein kinase 9(MAPK9)                                      | Homo sapiens |
| 827 11720673_a_at  | blue   | protein phosphatase, Mg2+/Mn2+ dependent 1A(PPM1A)                             | Homo sapiens |
| 828 11720674_a_at  | blue   | protein phosphatase, Mg2+/Mn2+ dependent 1A(PPM1A)                             | Homo sapiens |
| 841 11720770_a_at  | blue   | peptidylprolyl isomerase F(PPIF)                                               | Homo sapiens |
| 842 11720771_x_at  | blue   | peptidylprolyl isomerase F(PPIF)                                               | Homo sapiens |
| 845 11720787_a_at  | blue   | dynein cytoplasmic 1 light intermediate chain 1(DYNC1L1)                       | Homo sapiens |
| 888 11721028_at    | blue   | malonyl-CoA decarboxylase(MLYCD)                                               | Homo sapiens |
| 889 11721029_a_at  | blue   | phosphatidylinositol-4-phosphate 5-kinase type 1 beta(PIPSK1B)                 | Homo sapiens |
| 890 11721030_a_at  | blue   | phosphatidylinositol-4-phosphate 5-kinase type 1 beta(PIPSK1B)                 | Homo sapiens |
| 941 11721472_a_at  | blue   | holocytochrome c synthase(HCCS)                                                | Homo sapiens |
| 1028 11722004_s_at | blue   | cytochrome c, somatic(CYCS)                                                    | Homo sapiens |
| 1033 11722028_at   | blue   | ubiquitin conjugating enzyme E2 G1(UBE2G1)                                     | Homo sapiens |
| 1050 11722173_x_at | blue   | ubiquinol-cytochrome c reductase complex assembly factor 1(UQCC1)              | Homo sapiens |
| 1081 11722364_at   | blue   | cytochrome c oxidase subunit 6A2(COX6A2)                                       | Homo sapiens |
| 1103 11722482_x_at | blue   | mitochondrial fission factor(MFF)                                              | Homo sapiens |
| 1109 11722555_s_at | blue   | hydroxyacyl-CoA dehydrogenase(HADH)                                            | Homo sapiens |
| 1131 11722795_a_at | blue   | glycerophosphodiester phosphodiesterase 1(GDE1)                                | Homo sapiens |
| 1136 11722841_s_at | blue   | transcription factor B2, mitochondrial(TFB2M)                                  | Homo sapiens |
| 1146 11722911_at   | blue   | ubiquitin specific peptidase 13 (isopeptidase T-3)(USP13)                      | Homo sapiens |
| 1147 11722912_at   | blue   | ubiquitin specific peptidase 13 (isopeptidase T-3)(USP13)                      | Homo sapiens |
| 1148 11722913_s_at | blue   | ubiquitin specific peptidase 13 (isopeptidase T-3)(USP13)                      | Homo sapiens |
| 1206 11723263_a_at | blue   | antagonist of mitotic exit network 1 homolog(AMN1)                             | Homo sapiens |
| 1219 11723404_at   | blue   | PPARG coactivator 1 alpha(PPARGC1A)                                            | Homo sapiens |
| 1240 11723566_a_at | blue   | calpain 7(CAPN7)                                                               | Homo sapiens |
| 1338 11724350_s_at | blue   | protein phosphatase 1 regulatory inhibitor subunit 14C(PPP1R14C)               | Homo sapiens |
| 1382 11724765_a_at | blue   | FAST kinase domains 2(FASTKD2)                                                 | Homo sapiens |
| 1425 11725084_a_at | blue   | ubiquitin C-terminal hydrolase L5(UCHL5)                                       | Homo sapiens |
| 1442 11725237_a_at | blue   | RNA binding protein with multiple splicing 2(RBPMS2)                           | Homo sapiens |
| 1482 11725525_at   | blue   | desmoglein 2(DSG2)                                                             | Homo sapiens |
| 1488 11725620_a_at | blue   | pyruvate dehydrogenase (lipoamide) beta(PDHb)                                  | Homo sapiens |

|      |               |      |                                                                            |              |
|------|---------------|------|----------------------------------------------------------------------------|--------------|
| 1498 | 11725682_x_at | blue | MRS2, magnesium transporter(MRS2)                                          | Homo sapiens |
| 1521 | 11725894_at   | blue | taxilin beta(TXLNB)                                                        | Homo sapiens |
| 1528 | 11725957_x_at | blue | translocase of inner mitochondrial membrane 17 homolog A (yeast)(TIMM17A)  | Homo sapiens |
| 1542 | 11726035_at   | blue | phosphoglycerate mutase 2(PGAM2)                                           | Homo sapiens |
| 1547 | 11726087_at   | blue | heat shock protein family B (small) member 3(HSPB3)                        | Homo sapiens |
| 1550 | 11726104_a_at | blue | protein phosphatase 2 regulatory subunit B'alpha(PPP2R3A)                  | Homo sapiens |
| 1609 | 11726496_at   | blue | ryanodine receptor 2(RYR2)                                                 | Homo sapiens |
| 1630 | 11726676_a_at | blue | apolipoprotein B mRNA editing enzyme catalytic subunit 2(APOBEC2)          | Homo sapiens |
| 1662 | 11726974_a_at | blue | PERP, TP53 apoptosis effector(PERP)                                        | Homo sapiens |
| 1663 | 11726975_x_at | blue | PERP, TP53 apoptosis effector(PERP)                                        | Homo sapiens |
| 1700 | 11727417_a_at | blue | ATP5S like(ATP5SL)                                                         | Homo sapiens |
| 1737 | 11727791_s_at | blue | dihydrolipoamide S-acetyltransferase(DLAT)                                 | Homo sapiens |
| 1738 | 11727792_at   | blue | dihydrolipoamide S-acetyltransferase(DLAT)                                 | Homo sapiens |
| 1739 | 11727793_x_at | blue | dihydrolipoamide S-acetyltransferase(DLAT)                                 | Homo sapiens |
| 1767 | 11728003_a_at | blue | chromosome 4 open reading frame 48(C4orf48)                                | Homo sapiens |
| 1817 | 11728392_a_at | blue | LDL receptor related protein 12(LRP12)                                     | Homo sapiens |
| 1840 | 11728566_x_at | blue | family with sequence similarity 210 member A(FAM210A)                      | Homo sapiens |
| 1866 | 11728823_a_at | blue | solute carrier family 25 member 3(SLC25A3)                                 | Homo sapiens |
| 1867 | 11728824_s_at | blue | solute carrier family 25 member 3(SLC25A3)                                 | Homo sapiens |
| 1868 | 11728841_a_at | blue | pleckstrin homology domain containing A5(PLEKHA5)                          | Homo sapiens |
| 1894 | 11729126_a_at | blue | solute carrier family 25 member 3(SLC25A3)                                 | Homo sapiens |
| 1895 | 11729127_x_at | blue | solute carrier family 25 member 3(SLC25A3)                                 | Homo sapiens |
| 1910 | 11729237_a_at | blue | methylcrotonoyl-CoA carboxylase 2(MCCC2)                                   | Homo sapiens |
| 1917 | 11729312_at   | blue | nicotinamide nucleotide adenyllyltransferase 1(NMNAT1)                     | Homo sapiens |
| 1943 | 11729621_at   | blue | chloride voltage-gated channel 4(CLCN4)                                    | Homo sapiens |
| 1948 | 11729659_s_at | blue | transmembrane protein 69(TMEM69)                                           | Homo sapiens |
| 1977 | 11730010_a_at | blue | microtubule associated tumor suppressor candidate 2(MTUS2)                 | Homo sapiens |
| 1987 | 11730146_at   | blue | kelch like family member 31(KLHL31)                                        | Homo sapiens |
| 1990 | 11730159_at   | blue | RNA binding motif protein 20(RBM20)                                        | Homo sapiens |
| 1996 | 11730212_a_at | blue | mitochondrial ribosomal protein S7(MRPS7)                                  | Homo sapiens |
| 1997 | 11730213_s_at | blue | mitochondrial ribosomal protein S7(MRPS7)                                  | Homo sapiens |
| 2026 | 11730542_x_at | blue | acetyl-CoA acyltransferase 1(ACAA1)                                        | Homo sapiens |
| 2040 | 11730784_x_at | blue | origin recognition complex subunit 4(ORC4)                                 | Homo sapiens |
| 2048 | 11730835_a_at | blue | metaxin 2(MTX2)                                                            | Homo sapiens |
| 2067 | 11730958_a_at | blue | coiled-coil-helix-coiled-coil-helix domain containing 4(CHCHD4)            | Homo sapiens |
| 2101 | 11731417_a_at | blue | NADH:ubiquinone oxidoreductase core subunit S1(NDUFS1)                     | Homo sapiens |
| 2113 | 11731557_at   | blue | synaptopodin 2(SYNPO2)                                                     | Homo sapiens |
| 2116 | 11731614_x_at | blue | electron transfer flavoprotein alpha subunit(ETFA)                         | Homo sapiens |
| 2146 | 11731932_a_at | blue | KN motif and ankyrin repeat domains 1(KANK1)                               | Homo sapiens |
| 2164 | 11732193_a_at | blue | myeloid leukemia factor 1(MLF1)                                            | Homo sapiens |
| 2200 | 11732501_a_at | blue | tropomodulin 1(TMOD1)                                                      | Homo sapiens |
| 2204 | 11732524_a_at | blue | carnitine palmitoyltransferase 1B(CPT1B)                                   | Homo sapiens |
| 2229 | 11732857_a_at | blue | THAP domain containing 1(THAP1)                                            | Homo sapiens |
| 2249 | 11733032_at   | blue | RNA binding motif protein 18(RBM18)                                        | Homo sapiens |
| 2275 | 11733255_a_at | blue | carnitine palmitoyltransferase 1B(CPT1B)                                   | Homo sapiens |
| 2294 | 11733523_at   | blue | protein phosphatase 1 regulatory subunit 3A(PPP1R3A)                       | Homo sapiens |
| 2309 | 11733671_a_at | blue | EYA transcriptional coactivator and phosphatase 1(EYA1)                    | Homo sapiens |
| 2323 | 11733792_a_at | blue | solute carrier family 25 member 12(SLC25A12)                               | Homo sapiens |
| 2329 | 11733860_a_at | blue | cytoplasmic linker associated protein 2(CLASP2)                            | Homo sapiens |
| 2384 | 11734652_s_at | blue | ATP synthase, H+ transporting, mitochondrial Fo complex subunit B1(ATP5F1) | Homo sapiens |
| 2385 | 11734653_x_at | blue | ATP synthase, H+ transporting, mitochondrial Fo complex subunit B1(ATP5F1) | Homo sapiens |
| 2408 | 11734862_a_at | blue | trimethyllysine hydroxylase, epsilon(TMLHE)                                | Homo sapiens |
| 2426 | 11735040_at   | blue | ribosomal protein L3 like(RPL3L)                                           | Homo sapiens |
| 2429 | 11735097_x_at | blue | MLX, MAX dimerization protein(MLX)                                         | Homo sapiens |
| 2451 | 11735362_s_at | blue | AKT interacting protein(AKTIP)                                             | Homo sapiens |
| 2501 | 11736296_at   | blue | solute carrier family 5 member 1(SLC5A1)                                   | Homo sapiens |
| 2516 | 11736448_a_at | blue | gypsy retrotransposon integrase 1(GIN1)                                    | Homo sapiens |
| 2533 | 11736589_a_at | blue | de-etiolated homolog 1 (Arabidopsis)(DET1)                                 | Homo sapiens |
| 2549 | 11736770_a_at | blue | ADAM metallopeptidase domain 23(ADAM23)                                    | Homo sapiens |
| 2552 | 11736877_a_at | blue | DTW domain containing 2(DTWD2)                                             | Homo sapiens |
| 2554 | 11736965_at   | blue | F-box protein 40(FBXO40)                                                   | Homo sapiens |
| 2570 | 11737243_a_at | blue | fibronectin type III and SPRY domain containing 2(FSD2)                    | Homo sapiens |
| 2589 | 11737811_a_at | blue | nicotinamide nucleotide transhydrogenase(NNT)                              | Homo sapiens |
| 2603 | 11738054_a_at | blue | integrin subunit beta 1 binding protein 2(ITGB1BP2)                        | Homo sapiens |
| 2647 | 11739059_a_at | blue | OClA domain containing 1(OClAD1)                                           | Homo sapiens |
| 2669 | 11739345_x_at | blue | calmegin(CLGN)                                                             | Homo sapiens |
| 2680 | 11739437_at   | blue | PTC7 protein phosphatase homolog(PPTC7)                                    | Homo sapiens |
| 2682 | 11739453_a_at | blue | malic enzyme 2(ME2)                                                        | Homo sapiens |
| 2692 | 11739501_a_at | blue | desmoplakin(DSP)                                                           | Homo sapiens |
| 2693 | 11739506_a_at | blue | LON peptidase N-terminal domain and ring finger 2(LONRF2)                  | Homo sapiens |
| 2695 | 11739508_a_at | blue | N(alpha)-acetyltransferase 30, NatC catalytic subunit(NAA30)               | Homo sapiens |
| 2724 | 11739747_a_at | blue | kelch like family member 7(KLHL7)                                          | Homo sapiens |
| 2730 | 11739811_a_at | blue | sirtuin 3(SIRT3)                                                           | Homo sapiens |
| 2750 | 11740043_a_at | blue | mitochondrial methionyl-tRNA formyltransferase(MTFMT)                      | Homo sapiens |
| 2751 | 11740044_x_at | blue | mitochondrial methionyl-tRNA formyltransferase(MTFMT)                      | Homo sapiens |
| 2780 | 11740513_a_at | blue | phosphodiesterase 4D(PDE4D)                                                | Homo sapiens |
| 2792 | 11740745_a_at | blue | OPA1, mitochondrial dynamin like GTPase(OPA1)                              | Homo sapiens |
| 2793 | 11740746_s_at | blue | OPA1, mitochondrial dynamin like GTPase(OPA1)                              | Homo sapiens |
| 2820 | 11740990_x_at | blue | hyaluronoglucosaminidase 1(HYAL1)                                          | Homo sapiens |
| 2828 | 11741039_a_at | blue | death associated protein 3(DAP3)                                           | Homo sapiens |
| 2829 | 11741040_x_at | blue | death associated protein 3(DAP3)                                           | Homo sapiens |
| 2839 | 11741148_a_at | blue | peroxiredoxin 2(PRDX2)                                                     | Homo sapiens |



|      |               |      |                                                                                                                        |              |
|------|---------------|------|------------------------------------------------------------------------------------------------------------------------|--------------|
| 2858 | 11741402_a_at | blue | chromosome 21 open reading frame 33(C21orf33)                                                                          | Homo sapiens |
| 2859 | 11741428_a_at | blue | RNA binding protein, fox-1 homolog 1(RBFOX1)                                                                           | Homo sapiens |
| 2861 | 11741438_a_at | blue | calmegin(CLGN)                                                                                                         | Homo sapiens |
| 2878 | 11741650_a_at | blue | LDL receptor related protein 12(LRP12)                                                                                 | Homo sapiens |
| 2881 | 11741686_a_at | blue | family with sequence similarity 185 member A(FAM185A)                                                                  | Homo sapiens |
| 2886 | 11741749_x_at | blue | leucine rich repeat containing 2(LRRC2)                                                                                | Homo sapiens |
| 2906 | 11742035_a_at | blue | phospholipase C like 1(PLCL1)                                                                                          | Homo sapiens |
| 2921 | 11742273_a_at | blue | brain and reproductive organ-expressed (TNFRSF1A modulator)(BRE)                                                       | Homo sapiens |
| 2949 | 11742798_a_at | blue | chloride voltage-gated channel 3(CLCN3)                                                                                | Homo sapiens |
| 2969 | 11742943_a_at | blue | creatine kinase, M-type(CKM)                                                                                           | Homo sapiens |
| 2974 | 11742973_a_at | blue | acetyl-CoA acetyltransferase 1(ACAT1)                                                                                  | Homo sapiens |
| 2975 | 11742981_a_at | blue | fatty acid binding protein 3(FABP3)                                                                                    | Homo sapiens |
| 2985 | 11743015_a_at | blue | disco interacting protein 2 homolog C(DIP2C)                                                                           | Homo sapiens |
| 2988 | 11743048_s_at | blue | aconitase 2(ACO2)                                                                                                      | Homo sapiens |
| 2994 | 11743076_a_at | blue | protein activator of interferon induced protein kinase EIF2AK2(PRKRA)                                                  | Homo sapiens |
| 3036 | 11743505_a_at | blue | asparaginyl-tRNA synthetase 2, mitochondrial (putative)(NARS2)                                                         | Homo sapiens |
| 3037 | 11743517_a_at | blue | nicotinamide nucleotide transhydrogenase(NNT)                                                                          | Homo sapiens |
| 3055 | 11743648_a_at | blue | DDB1 and CUL4 associated factor 6(DCAF6)                                                                               | Homo sapiens |
| 3064 | 11743728_a_at | blue | coiled-coil domain containing 47(CCDC47)                                                                               | Homo sapiens |
| 3083 | 11743887_s_at | blue | S-phase response (cyclin related)(SPHR)                                                                                | Homo sapiens |
| 3093 | 11743979_a_at | blue | ubiquinol-cytochrome c reductase core protein I(UQCRC1)                                                                | Homo sapiens |
| 3108 | 11744059_a_at | blue | ubiquinol-cytochrome c reductase core protein II(UQCRC2)                                                               | Homo sapiens |
| 3109 | 11744060_s_at | blue | ubiquinol-cytochrome c reductase core protein II(UQCRC2)                                                               | Homo sapiens |
| 3125 | 11744166_a_at | blue | fumarate hydratase(FH)                                                                                                 | Homo sapiens |
| 3131 | 11744182_a_at | blue | phenylalanyl-tRNA synthetase 2, mitochondrial(FARS2)                                                                   | Homo sapiens |
| 3144 | 11744261_a_at | blue | solute carrier family 25 member 11(SCL25A11)                                                                           | Homo sapiens |
| 3148 | 11744275_a_at | blue | WD repeat domain 12(WDR12)                                                                                             | Homo sapiens |
| 3174 | 11744462_x_at | blue | PCI domain containing 2(PCID2)                                                                                         | Homo sapiens |
| 3194 | 11744632_a_at | blue | COX11, cytochrome c oxidase copper chaperone(COX11)                                                                    | Homo sapiens |
| 3233 | 11744901_s_at | blue | NADH:ubiquinone oxidoreductase core subunit S1(NDUFS1)                                                                 | Homo sapiens |
| 3253 | 11745163_s_at | blue | hydroxyacyl-CoA dehydrogenase/3-ketoacyl-CoA thiolase/enoyl-CoA hydratase (trifunctional protein), beta subunit(HADHB) | Homo sapiens |
| 3256 | 11745185_s_at | blue | mitochondrial fission factor(MFF)                                                                                      | Homo sapiens |
| 3260 | 11745230_a_at | blue | T-cell activation inhibitor, mitochondrial(TCAIM)                                                                      | Homo sapiens |
| 3284 | 11745462_a_at | blue | peroxiredoxin 2(PRX2)                                                                                                  | Homo sapiens |
| 3295 | 11745517_s_at | blue | succinate dehydrogenase complex iron sulfur subunit B(SDHB)                                                            | Homo sapiens |
| 3297 | 11745527_a_at | blue | heat shock transcription factor 2(HSF2)                                                                                | Homo sapiens |
| 3310 | 11745812_x_at | blue | isocitrate dehydrogenase 3 (NAD(+)) beta(IDH3B)                                                                        | Homo sapiens |
| 3315 | 11745858_a_at | blue | ATP5S like(ATP5SL)                                                                                                     | Homo sapiens |
| 3316 | 11745859_x_at | blue | ATP5S like(ATP5SL)                                                                                                     | Homo sapiens |
| 3318 | 11745869_a_at | blue | mitochondrial pyruvate carrier 2(MPC2)                                                                                 | Homo sapiens |
| 3349 | 11746084_a_at | blue | protein-L-isoaspartate (D-aspartate) O-methyltransferase(PCMT1)                                                        | Homo sapiens |
| 3398 | 11746655_a_at | blue | acetyl-CoA acyltransferase 1(ACAA1)                                                                                    | Homo sapiens |
| 3411 | 11746844_a_at | blue | transmembrane protein 143(TMEM143)                                                                                     | Homo sapiens |
| 3412 | 11746845_a_at | blue | transmembrane protein 143(TMEM143)                                                                                     | Homo sapiens |
| 3420 | 11746918_a_at | blue | L-2-hydroxyglutarate dehydrogenase(L2HGDH)                                                                             | Homo sapiens |
| 3429 | 11747013_a_at | blue | pyrophosphatase (inorganic) 2(PPA2)                                                                                    | Homo sapiens |
| 3437 | 11747126_x_at | blue | ADP-ribosyltransferase 3(ART3)                                                                                         | Homo sapiens |
| 3453 | 11747313_a_at | blue | OXA1L, mitochondrial inner membrane protein(OXA1L)                                                                     | Homo sapiens |
| 3454 | 11747315_a_at | blue | ectonucleoside triphosphate diphosphohydrolase 6 (putative)(ENTP6)                                                     | Homo sapiens |
| 3455 | 11747345_s_at | blue | acyl-CoA dehydrogenase, C-4 to C-12 straight chain(ACADM)                                                              | Homo sapiens |
| 3456 | 11747346_x_at | blue | acyl-CoA dehydrogenase, C-4 to C-12 straight chain(ACADM)                                                              | Homo sapiens |
| 3458 | 11747401_s_at | blue | COP9 signalosome subunit 7A(COPS7A)                                                                                    | Homo sapiens |
| 3476 | 11747533_a_at | blue | G-rich RNA sequence binding factor 1(GRSF1)                                                                            | Homo sapiens |
| 3479 | 11747546_a_at | blue | phosphatidylinositol-4-phosphate 5-kinase type 1 beta(PIP5K1B)                                                         | Homo sapiens |
| 3480 | 11747559_a_at | blue | PDZ domain containing ring finger 3(PDZRN3)                                                                            | Homo sapiens |
| 3481 | 11747589_a_at | blue | glutamic-oxaloacetic transaminase 2(GOT2)                                                                              | Homo sapiens |
| 3497 | 11747677_a_at | blue | basic leucine zipper and W2 domains 2(BZW2)                                                                            | Homo sapiens |
| 3506 | 11747772_x_at | blue | pyruvate dehydrogenase (lipoamide) alpha 1(PDHA1)                                                                      | Homo sapiens |
| 3513 | 11747902_a_at | blue | echinoderm microtubule associated protein like 1(EML1)                                                                 | Homo sapiens |
| 3521 | 11748014_s_at | blue | voltage dependent anion channel 3(VDAC3)                                                                               | Homo sapiens |
| 3522 | 11748015_x_at | blue | voltage dependent anion channel 3(VDAC3)                                                                               | Homo sapiens |
| 3528 | 11748148_a_at | blue | coenzyme Q6, monooxygenase(COQ6)                                                                                       | Homo sapiens |
| 3531 | 11748216_a_at | blue | staufen double-stranded RNA binding protein 2(STAU2)                                                                   | Homo sapiens |
| 3536 | 11748253_a_at | blue | solute carrier family 5 member 1(SLC5A1)                                                                               | Homo sapiens |
| 3538 | 11748273_a_at | blue | Raf-1 proto-oncogene, serine/threonine kinase(RAF1)                                                                    | Homo sapiens |
| 3543 | 11748325_x_at | blue | mitochondrial ribosomal protein S22(MRPS22)                                                                            | Homo sapiens |
| 3553 | 11748423_a_at | blue | phosphoglucomutase 1(PGM1)                                                                                             | Homo sapiens |
| 3557 | 11748509_s_at | blue | voltage dependent anion channel 2(VDAC2)                                                                               | Homo sapiens |
| 3560 | 11748541_s_at | blue | protease associated domain containing 1(PRADC1)                                                                        | Homo sapiens |
| 3562 | 11748553_x_at | blue | ubiquinol-cytochrome c reductase complex assembly factor 1(UQCC1)                                                      | Homo sapiens |
| 3565 | 11748583_x_at | blue | ADP-ribosyltransferase 3(ART3)                                                                                         | Homo sapiens |
| 3567 | 11748620_x_at | blue | succinate-CoA ligase ADP-forming beta subunit(SUCLA2)                                                                  | Homo sapiens |
| 3570 | 11748671_a_at | blue | cullin 4A(CUL4A)                                                                                                       | Homo sapiens |
| 3580 | 11748839_a_at | blue | NFS1, cysteine desulfurase(NFS1)                                                                                       | Homo sapiens |
| 3583 | 11748854_a_at | blue | RNA pseudouridylyl synthase domain containing 4(RPUSD4)                                                                | Homo sapiens |
| 3585 | 11748860_a_at | blue | apolipoprotein B mRNA editing enzyme catalytic subunit 2(APOBEC2)                                                      | Homo sapiens |
| 3586 | 11748874_a_at | blue | mitochondrial ribosomal protein S25(MRPS25)                                                                            | Homo sapiens |
| 3606 | 11749144_s_at | blue | electron transfer flavoprotein dehydrogenase(ETFDH)                                                                    | Homo sapiens |
| 3610 | 11749201_a_at | blue | IQCJ-SCHIP1 readthrough(IQCJ-SCHIP1)                                                                                   | Homo sapiens |
| 3615 | 11749261_a_at | blue | tubulin folding cofactor E(TBCE)                                                                                       | Homo sapiens |
| 3621 | 11749311_a_at | blue | GrpE like 1, mitochondrial(GRPEL1)                                                                                     | Homo sapiens |
| 3625 | 11749369_a_at | blue | VAMP associated protein B and C(VAPB)                                                                                  | Homo sapiens |

|      |               |      |                                                                                      |              |
|------|---------------|------|--------------------------------------------------------------------------------------|--------------|
| 3629 | 11749392_a_at | blue | ATP synthase, H+ transporting, mitochondrial F1 complex, gamma polypeptide 1(ATP5C1) | Homo sapiens |
| 3654 | 11749690_a_at | blue | LARGE xylosyl- and glucuronyltransferase 1(LARGE1)                                   | Homo sapiens |
| 3655 | 11749697_a_at | blue | NADH:ubiquinone oxidoreductase core subunit S1(NDUFS1)                               | Homo sapiens |
| 3657 | 11749722_a_at | blue | NADH:ubiquinone oxidoreductase core subunit S1(NDUFS1)                               | Homo sapiens |
| 3678 | 11749914_a_at | blue | single-pass membrane protein with coiled-coil domains 1(SMCO1)                       | Homo sapiens |
| 3687 | 11750038_a_at | blue | mitochondrial trans-2-enoyl-CoA reductase(MECR)                                      | Homo sapiens |
| 3688 | 11750044_a_at | blue | NFS1, cysteine desulfurase(NFS1)                                                     | Homo sapiens |
| 3690 | 11750059_a_at | blue | MLX, MAX dimerization protein(MLX)                                                   | Homo sapiens |
| 3692 | 11750103_a_at | blue | hydroxyacyl-CoA dehydrogenase(HADH)                                                  | Homo sapiens |
| 3695 | 11750135_a_at | blue | monoamine oxidase B(MAOB)                                                            | Homo sapiens |
| 3733 | 11750594_a_at | blue | phospholipase C like 1(PLCL1)                                                        | Homo sapiens |
| 3759 | 11750914_a_at | blue | G1 to S phase transition 2(GSP2)                                                     | Homo sapiens |
| 3762 | 11751002_x_at | blue | dihydroliipoamide S-acetyltransferase(DLAT)                                          | Homo sapiens |
| 3779 | 11751305_a_at | blue | beta-1,4-glucuronyltransferase 1(B4GAT1)                                             | Homo sapiens |
| 3787 | 11751440_a_at | blue | microtubule associated tumor suppressor candidate 2(MTUS2)                           | Homo sapiens |
| 3795 | 11751585_a_at | blue | ankyrin repeat and SOCS box containing 8(ASB8)                                       | Homo sapiens |
| 3802 | 11751616_a_at | blue | lactamase beta 2(LACTB2)                                                             | Homo sapiens |
| 3813 | 11751702_a_at | blue | PAT1, crumbs cell polarity complex component(PAT1)                                   | Homo sapiens |
| 3820 | 11751776_a_at | blue | prohibitin(PHB)                                                                      | Homo sapiens |
| 3828 | 11751861_x_at | blue | hyaluronoglucosaminidase 1(HYAL1)                                                    | Homo sapiens |
| 3879 | 11752649_s_at | blue | aconitase 2(ACO2)                                                                    | Homo sapiens |
| 3885 | 11752747_a_at | blue | MRS2, magnesium transporter(MRS2)                                                    | Homo sapiens |
| 3886 | 11752748_x_at | blue | MRS2, magnesium transporter(MRS2)                                                    | Homo sapiens |
| 3904 | 11752915_a_at | blue | ryanodine receptor 2(RYR2)                                                           | Homo sapiens |
| 3906 | 11752919_x_at | blue | acyl-CoA dehydrogenase, C-4 to C-12 straight chain(ACADM)                            | Homo sapiens |
| 3911 | 11752964_a_at | blue | solute carrier family 25 member 20(SLC25A20)                                         | Homo sapiens |
| 3938 | 11753345_a_at | blue | cutC copper transporter(CUTC)                                                        | Homo sapiens |
| 3944 | 11753467_a_at | blue | aminomethyltransferase(AMT)                                                          | Homo sapiens |
| 3945 | 11753480_a_at | blue | reticulon 4 interacting protein 1(RTN4IP1)                                           | Homo sapiens |
| 3947 | 11753505_a_at | blue | post-GPI attachment to proteins 2(PGAP2)                                             | Homo sapiens |
| 3958 | 11753628_a_at | blue | abhydrolase domain containing 11(ABHD11)                                             | Homo sapiens |
| 3968 | 11753803_x_at | blue | cytochrome c, somatic(CYCS)                                                          | Homo sapiens |
| 3981 | 11753896_a_at | blue | pyruvate dehydrogenase (lipoamide) alpha 1(PDHA1)                                    | Homo sapiens |
| 3996 | 11754023_a_at | blue | cytochrome c oxidase subunit 7A2 like(COX7A2L)                                       | Homo sapiens |
| 3997 | 11754024_a_at | blue | solute carrier family 25 member 11(SLC25A11)                                         | Homo sapiens |
| 3998 | 11754027_x_at | blue | cytochrome c1(CYC1)                                                                  | Homo sapiens |
| 4027 | 11754272_x_at | blue | small nuclear ribonucleoprotein polypeptide N(SNRPN)                                 | Homo sapiens |
| 4047 | 11754381_a_at | blue | tropomodulin 1(TMOD1)                                                                | Homo sapiens |
| 4063 | 11754510_s_at | blue | voltage dependent anion channel 3(VDAC3)                                             | Homo sapiens |
| 4073 | 11754598_s_at | blue | DnaJ heat shock protein family (Hsp40) member A3(DNAJA3)                             | Homo sapiens |
| 4115 | 11754844_x_at | blue | COP9 signalosome subunit 5(COP5)                                                     | Homo sapiens |
| 4123 | 11754888_a_at | blue | adenylosuccinate synthase like 1(ADSSL1)                                             | Homo sapiens |
| 4141 | 11755018_a_at | blue | protein phosphatase 1 catalytic subunit gamma(PPP1CC)                                | Homo sapiens |
| 4174 | 11755266_x_at | blue | succinate-CoA ligase ADP-forming beta subunit(SUCLA2)                                | Homo sapiens |
| 4206 | 11755425_a_at | blue | family with sequence similarity 179 member B(FAM179B)                                | Homo sapiens |
| 4249 | 11755788_a_at | blue | kinesin family member 21A(KIF21A)                                                    | Homo sapiens |
| 4268 | 11755960_a_at | blue | leucine rich repeat containing 39(LRRC39)                                            | Homo sapiens |
| 4270 | 11755980_x_at | blue | solute carrier family 25 member 3(SLC25A3)                                           | Homo sapiens |
| 4282 | 11756096_a_at | blue | solute carrier family 25 member 4(SLC25A4)                                           | Homo sapiens |
| 4283 | 11756099_a_at | blue | lactate dehydrogenase B(LDHB)                                                        | Homo sapiens |
| 4297 | 11756183_x_at | blue | solute carrier family 25 member 11(SLC25A11)                                         | Homo sapiens |
| 4303 | 11756232_s_at | blue | voltage dependent anion channel 2(VDAC2)                                             | Homo sapiens |
| 4304 | 11756239_s_at | blue | mitochondrial ribosomal protein S35(MRPS35)                                          | Homo sapiens |
| 4314 | 11756296_x_at | blue | mitochondrial fission factor(MFF)                                                    | Homo sapiens |
| 4328 | 11756367_x_at | blue | solute carrier family 25 member 4(SLC25A4)                                           | Homo sapiens |
| 4345 | 11756499_a_at | blue | kelch domain containing 2(KLHDC2)                                                    | Homo sapiens |
| 4347 | 11756501_a_at | blue | transmembrane protein 38B(TMEM38B)                                                   | Homo sapiens |
| 4358 | 11756593_a_at | blue | uroporphyrinogen decarboxylase(UROD)                                                 | Homo sapiens |
| 4378 | 11756722_a_at | blue | stomatin like 2(STOML2)                                                              | Homo sapiens |
| 4416 | 11757011_a_at | blue | SPRY domain containing 7(SPRYD7)                                                     | Homo sapiens |
| 4418 | 11757030_at   | blue | enoyl-CoA hydratase 1(ECH1)                                                          | Homo sapiens |
| 4482 | 11757443_s_at | blue | translocase of inner mitochondrial membrane 21(TIMM21)                               | Homo sapiens |
| 4488 | 11757465_s_at | blue | glioblastoma amplified sequence(GBAS)                                                | Homo sapiens |
| 4499 | 11757524_x_at | blue | cytochrome c1(CYC1)                                                                  | Homo sapiens |
| 4503 | 11757538_a_at | blue | glutamic-oxaloacetic transaminase 1(GOT1)                                            | Homo sapiens |
| 4563 | 11757873_x_at | blue | ATP synthase, H+ transporting, mitochondrial F1 complex, beta polypeptide(ATP5B)     | Homo sapiens |
| 4601 | 11758056_s_at | blue | threonyl-tRNA synthetase like 2(TARSL2)                                              | Homo sapiens |
| 4608 | 11758101_s_at | blue | eukaryotic translation initiation factor 4E binding protein 2(EIF4EBP2)              | Homo sapiens |
| 4612 | 11758132_s_at | blue | trimethyllysine hydroxylase, epsilon(TMLHE)                                          | Homo sapiens |
| 4622 | 11758190_s_at | blue | succinate dehydrogenase complex subunit D(SDHD)                                      | Homo sapiens |
| 4629 | 11758218_s_at | blue | motile sperm domain containing 1(MOSPD1)                                             | Homo sapiens |
| 4636 | 11758244_s_at | blue | A-kinase anchoring protein 6(AKAP6)                                                  | Homo sapiens |
| 4637 | 11758248_s_at | blue | succinate dehydrogenase complex subunit D(SDHD)                                      | Homo sapiens |
| 4650 | 11758311_s_at | blue | succinate dehydrogenase complex subunit D(SDHD)                                      | Homo sapiens |
| 4653 | 11758330_x_at | blue | succinate dehydrogenase complex subunit D(SDHD)                                      | Homo sapiens |
| 4655 | 11758335_s_at | blue | ferredoxin 1(FDX1)                                                                   | Homo sapiens |
| 4664 | 11758402_s_at | blue | family with sequence similarity 179 member B(FAM179B)                                | Homo sapiens |
| 4707 | 11758755_at   | blue | mitochondrial pyruvate carrier 2(MPC2)                                               | Homo sapiens |
| 4745 | 11759179_at   | blue | transmembrane protein 38B(TMEM38B)                                                   | Homo sapiens |
| 4748 | 11759288_at   | blue | thioredoxin related transmembrane protein 4(TM4)                                     | Homo sapiens |
| 4758 | 11759417_s_at | blue | heat shock protein family A (Hsp70) member 9(HSPA9)                                  | Homo sapiens |
| 4768 | 11759519_a_at | blue | succinate-CoA ligase ADP-forming beta subunit(SUCLA2)                                | Homo sapiens |

|      |                |      |                                                      |              |
|------|----------------|------|------------------------------------------------------|--------------|
| 4854 | 11761446_a_at  | blue | stauken double-stranded RNA binding protein 2(STAU2) | Homo sapiens |
| 4929 | 11763335_a_at  | blue | malate dehydrogenase 2(MDH2)                         | Homo sapiens |
| 4944 | 11763522_a_at  | blue | ryanodine receptor 2(RYR2)                           | Homo sapiens |
| 4951 | 11763627_a_at  | blue | solute carrier family 25 member 10(SLC25A10)         | Homo sapiens |
| 4956 | 11763699_a_at  | blue | cytoplasmic linker associated protein 2(CLASP2)      | Homo sapiens |
| 4982 | 200030_PM_s_at | blue | solute carrier family 25 member 3(SLC25A3)           | Homo sapiens |

| gene              | hcolor | Name                                                                                   | Species      |
|-------------------|--------|----------------------------------------------------------------------------------------|--------------|
| 9 11715349_a_at   | brown  | cytochrome c oxidase subunit 7C(COX7C)                                                 | Homo sapiens |
| 14 11715369_s_at  | brown  | NDUFA4, mitochondrial complex associated(NDUFA4)                                       | Homo sapiens |
| 16 11715377_x_at  | brown  | cytochrome c oxidase subunit 4I1(COX4I1)                                               | Homo sapiens |
| 27 11715458_a_at  | brown  | cytochrome c oxidase subunit 8A(COX8A)                                                 | Homo sapiens |
| 28 11715459_x_at  | brown  | cytochrome c oxidase subunit 8A(COX8A)                                                 | Homo sapiens |
| 37 11715497_a_at  | brown  | OXA1L, mitochondrial inner membrane protein(OXA1L)                                     | Homo sapiens |
| 48 11715616_a_at  | brown  | NADH:ubiquinone oxidoreductase subunit AB1(NDUFAB1)                                    | Homo sapiens |
| 66 11715694_at    | brown  | cytochrome c oxidase subunit 7B(COX7B)                                                 | Homo sapiens |
| 67 11715695_x_at  | brown  | cytochrome c oxidase subunit 7B(COX7B)                                                 | Homo sapiens |
| 74 11715744_a_at  | brown  | ATP synthase, H+ transporting, mitochondrial Fo complex subunit F6(ATP5J)              | Homo sapiens |
| 77 11715772_x_at  | brown  | mitochondrial ribosomal protein L13(MRPL13)                                            | Homo sapiens |
| 86 11715867_x_at  | brown  | mitochondrial ribosomal protein L41(MRPL41)                                            | Homo sapiens |
| 89 11715874_s_at  | brown  | ATP synthase, H+ transporting, mitochondrial Fo complex subunit D(ATP5H)               | Homo sapiens |
| 95 11715899_a_at  | brown  | succinate-CoA ligase alpha subunit(SUCLG1)                                             | Homo sapiens |
| 111 11715988_x_at | brown  | ATP synthase, H+ transporting, mitochondrial Fo complex subunit C1 (subunit 9)(ATP5G1) | Homo sapiens |
| 113 11715995_at   | brown  | mitochondrial ribosomal protein L16(MRPL16)                                            | Homo sapiens |
| 114 11715997_a_at | brown  | NADH:ubiquinone oxidoreductase subunit C1(NDUFC1)                                      | Homo sapiens |
| 119 11716029_a_at | brown  | NADH:ubiquinone oxidoreductase subunit B9(NDUFB9)                                      | Homo sapiens |
| 120 11716030_x_at | brown  | NADH:ubiquinone oxidoreductase subunit B9(NDUFB9)                                      | Homo sapiens |
| 125 11716047_a_at | brown  | chromosome 21 open reading frame 33(C21orf33)                                          | Homo sapiens |
| 127 11716061_a_at | brown  | family with sequence similarity 162 member A(FAM162A)                                  | Homo sapiens |
| 136 11716116_a_at | brown  | NADH:ubiquinone oxidoreductase subunit S6(NDUFS6)                                      | Homo sapiens |
| 150 11716243_a_at | brown  | protein phosphatase 1 regulatory subunit 16A(PPP1R16A)                                 | Homo sapiens |
| 162 11716315_at   | brown  | mitochondrial ribosomal protein L15(MRPL15)                                            | Homo sapiens |
| 165 11716340_a_at | brown  | NADH:ubiquinone oxidoreductase subunit S4(NDUFS4)                                      | Homo sapiens |
| 166 11716350_a_at | brown  | HSPE1-MOB4 readthrough(HSPE1-MOB4)                                                     | Homo sapiens |
| 167 11716355_s_at | brown  | NADH:ubiquinone oxidoreductase subunit A11(NDUFA11)                                    | Homo sapiens |
| 179 11716415_s_at | brown  | NADH:ubiquinone oxidoreductase subunit B8(NDUFB8)                                      | Homo sapiens |
| 181 11716432_a_at | brown  | MNAT1, CDK activating kinase assembly factor(MNAT1)                                    | Homo sapiens |
| 182 11716442_a_at | brown  | RNA polymerase II subunit L(POLR2L)                                                    | Homo sapiens |
| 189 11716472_a_at | brown  | Raf-1 proto-oncogene, serine/threonine kinase(RAF1)                                    | Homo sapiens |
| 193 11716519_s_at | brown  | short chain dehydrogenase/reductase family 39U member 1(SDR39U1)                       | Homo sapiens |
| 198 11716563_s_at | brown  | aminoacyl tRNA synthetase complex interacting multifunctional protein 2(AIMP2)         | Homo sapiens |
| 203 11716606_s_at | brown  | stomatin like 2(STOML2)                                                                | Homo sapiens |
| 204 11716617_at   | brown  | mitochondrial ribosomal protein L36(MRPL36)                                            | Homo sapiens |
| 222 11716700_at   | brown  | SNAP associated protein(SNAPIN)                                                        | Homo sapiens |
| 258 11716890_a_at | brown  | transmembrane protein 261(TMEM261)                                                     | Homo sapiens |
| 260 11716900_at   | brown  | ADP ribosylation factor like GTPase 3(ARL3)                                            | Homo sapiens |
| 266 11716935_a_at | brown  | superoxide dismutase 1, soluble(SOD1)                                                  | Homo sapiens |
| 271 11716953_at   | brown  | transmembrane protein 126A(TMEM126A)                                                   | Homo sapiens |
| 275 11716984_a_at | brown  | paroxysmal nonkinesigenic dyskinesia(PNKD)                                             | Homo sapiens |
| 281 11717060_a_at | brown  | 2,4-dienoyl-CoA reductase 1, mitochondrial(DEC1)                                       | Homo sapiens |
| 296 11717251_s_at | brown  | NADH:ubiquinone oxidoreductase subunit B11(NDUFB11)                                    | Homo sapiens |
| 297 11717252_x_at | brown  | NADH:ubiquinone oxidoreductase subunit B11(NDUFB11)                                    | Homo sapiens |
| 322 11717407_a_at | brown  | ribonuclease P/MRP subunit p25 like(RPP25L)                                            | Homo sapiens |
| 328 11717429_x_at | brown  | peroxiredoxin 5(PRX5)                                                                  | Homo sapiens |
| 360 11717634_a_at | brown  | cytochrome c oxidase subunit 6C(COX6C)                                                 | Homo sapiens |
| 363 11717643_a_at | brown  | mitochondrial ribosomal protein L24(MRPL24)                                            | Homo sapiens |
| 364 11717654_a_at | brown  | C-X9-C motif containing 4(CMC4)                                                        | Homo sapiens |
| 368 11717670_a_at | brown  | NADH:ubiquinone oxidoreductase subunit B6(NDUFB6)                                      | Homo sapiens |
| 396 11717859_a_at | brown  | emopamil binding protein (sterol isomerase)(EBP)                                       | Homo sapiens |
| 427 11718036_at   | brown  | peptidylprolyl isomerase like 1(PPI1)                                                  | Homo sapiens |
| 437 11718076_at   | brown  | mitogen-activated protein kinase-activated protein kinase 3(MAPKAPK3)                  | Homo sapiens |
| 447 11718150_at   | brown  | protease associated domain containing 1(PRADC1)                                        | Homo sapiens |
| 462 11718276_x_at | brown  | interferon related developmental regulator 2(IFRD2)                                    | Homo sapiens |
| 463 11718278_s_at | brown  | NADH:ubiquinone oxidoreductase subunit B4(NDUFB4)                                      | Homo sapiens |
| 464 11718282_s_at | brown  | NADH:ubiquinone oxidoreductase core subunit V2(NDUFV2)                                 | Homo sapiens |
| 486 11718430_a_at | brown  | zinc finger protein 32(ZNF32)                                                          | Homo sapiens |
| 531 11718764_at   | brown  | cytochrome c oxidase subunit 5B(COX5B)                                                 | Homo sapiens |
| 532 11718765_a_at | brown  | NADH:ubiquinone oxidoreductase subunit A6(NDUFA6)                                      | Homo sapiens |
| 541 11718831_at   | brown  | NADH:ubiquinone oxidoreductase subunit A2(NDUFA2)                                      | Homo sapiens |
| 570 11718991_a_at | brown  | NADH:ubiquinone oxidoreductase subunit B7(NDUFB7)                                      | Homo sapiens |
| 583 11719111_a_at | brown  | chromosome 11 open reading frame 1(C11orf1)                                            | Homo sapiens |
| 611 11719304_a_at | brown  | ER membrane protein complex subunit 8(EMC8)                                            | Homo sapiens |
| 630 11719424_at   | brown  | family with sequence similarity 220 member A(FAM220A)                                  | Homo sapiens |
| 639 11719482_a_at | brown  | mitochondrial ribosomal protein L21(MRPL21)                                            | Homo sapiens |
| 651 11719566_a_at | brown  | mitochondrial ribosomal protein S15(MRPS15)                                            | Homo sapiens |
| 682 11719830_a_at | brown  | ERCC excision repair 1, endonuclease non-catalytic subunit(ERCC1)                      | Homo sapiens |
| 693 11719877_a_at | brown  | tRNA phosphotransferase 1(TRPT1)                                                       | Homo sapiens |
| 729 11720114_a_at | brown  | ubiquitin conjugating enzyme E2 D4 (putative)(UBE2D4)                                  | Homo sapiens |
| 732 11720140_at   | brown  | Rab interacting lysosomal protein(RILP)                                                | Homo sapiens |
| 740 11720171_s_at | brown  | mitochondrial ribosomal protein S16(MRPS16)                                            | Homo sapiens |
| 742 11720188_a_at | brown  | NADH:ubiquinone oxidoreductase subunit A7(NDUFA7)                                      | Homo sapiens |
| 744 11720192_at   | brown  | NADH:ubiquinone oxidoreductase complex assembly factor 4(NDUFAF4)                      | Homo sapiens |
| 745 11720193_x_at | brown  | NADH:ubiquinone oxidoreductase complex assembly factor 4(NDUFAF4)                      | Homo sapiens |
| 775 11720328_a_at | brown  | ATP synthase, H+ transporting, mitochondrial F1 complex, O subunit(ATP5O)              | Homo sapiens |
| 794 11720487_a_at | brown  | heme binding protein 2(HEBP2)                                                          | Homo sapiens |
| 802 11720535_a_at | brown  | methylmalonic aciduria (cobalamin deficiency) cblB type(MMAB)                          | Homo sapiens |
| 815 11720610_x_at | brown  | prohibitin(PHB)                                                                        | Homo sapiens |
| 819 11720630_a_at | brown  | small nuclear ribonucleoprotein U11/U12 subunit 25(SNRNP25)                            | Homo sapiens |

|      |               |       |                                                                               |              |
|------|---------------|-------|-------------------------------------------------------------------------------|--------------|
| 820  | 11720631_a_at | brown | succinate dehydrogenase complex iron sulfur subunit B(SDHB)                   | Homo sapiens |
| 821  | 11720632_x_at | brown | succinate dehydrogenase complex iron sulfur subunit B(SDHB)                   | Homo sapiens |
| 822  | 11720635_a_at | brown | ATP synthase, H+ transporting, mitochondrial F1 complex, delta subunit(ATP5D) | Homo sapiens |
| 843  | 11720773_x_at | brown | DnaJ heat shock protein family (Hsp40) member C19(DNAJC19)                    | Homo sapiens |
| 844  | 11720774_s_at | brown | DnaJ heat shock protein family (Hsp40) member C19(DNAJC19)                    | Homo sapiens |
| 851  | 11720809_x_at | brown | phosphoglycerate dehydrogenase(PHGDH)                                         | Homo sapiens |
| 852  | 11720821_x_at | brown | FUN14 domain containing 2(FUNDC2)                                             | Homo sapiens |
| 860  | 11720863_a_at | brown | patain like phospholipase domain containing 4(PNPLA4)                         | Homo sapiens |
| 862  | 11720884_a_at | brown | hydroxymethylbilane synthase(HMBS)                                            | Homo sapiens |
| 880  | 11720974_at   | brown | ankyrin repeat and SOCS box containing 8(ASB8)                                | Homo sapiens |
| 898  | 11721077_a_at | brown | esterase D(ESD)                                                               | Homo sapiens |
| 903  | 11721111_a_at | brown | acyl-CoA thioesterase 13(ACOT13)                                              | Homo sapiens |
| 921  | 11721265_s_at | brown | glutamyl-tRNA amidotransferase subunit B(GATB)                                | Homo sapiens |
| 923  | 11721296_a_at | brown | NADH:ubiquinone oxidoreductase subunit B1(NDUFB1)                             | Homo sapiens |
| 940  | 11721461_a_at | brown | COP9 signalosome subunit 5(COP5)                                              | Homo sapiens |
| 942  | 11721473_a_at | brown | holocytochrome c synthase(HCCS)                                               | Homo sapiens |
| 968  | 11721673_at   | brown | glutaredoxin 5(GLRX5)                                                         | Homo sapiens |
| 969  | 11721674_s_at | brown | glutaredoxin 5(GLRX5)                                                         | Homo sapiens |
| 970  | 11721675_x_at | brown | glutaredoxin 5(GLRX5)                                                         | Homo sapiens |
| 971  | 11721683_a_at | brown | mitochondrial ribosomal protein S9(MRPS9)                                     | Homo sapiens |
| 993  | 11721836_x_at | brown | transmembrane protein 14B(TMEM14B)                                            | Homo sapiens |
| 1000 | 11721851_x_at | brown | coiled-coil-helix-coiled-coil-helix domain containing 6(CHCHD6)               | Homo sapiens |
| 1036 | 11722040_a_at | brown | eukaryotic translation initiation factor 2B subunit gamma(EIF2B3)             | Homo sapiens |
| 1054 | 11722194_a_at | brown | microRNA 4691(MIR4691)                                                        | Homo sapiens |
| 1056 | 11722226_s_at | brown | succinate dehydrogenase complex assembly factor 3(SDHAF3)                     | Homo sapiens |
| 1077 | 11722338_at   | brown | peroxisomal biogenesis factor 7(PEX7)                                         | Homo sapiens |
| 1163 | 11723046_a_at | brown | mitochondrial assembly of ribosomal large subunit 1(MALSU1)                   | Homo sapiens |
| 1166 | 11723056_a_at | brown | mitochondrial ribosomal protein L33(MRPL33)                                   | Homo sapiens |
| 1167 | 11723057_x_at | brown | mitochondrial ribosomal protein L33(MRPL33)                                   | Homo sapiens |
| 1174 | 11723080_at   | brown | matrix AAA peptidase interacting protein 1(MAIP1)                             | Homo sapiens |
| 1211 | 11723313_s_at | brown | peroxisomal membrane protein 2(PXMP2)                                         | Homo sapiens |
| 1225 | 11723426_a_at | brown | electron transfer flavoprotein beta subunit(ETFB)                             | Homo sapiens |
| 1229 | 11723449_a_at | brown | NADH:ubiquinone oxidoreductase subunit V3(NDUFV3)                             | Homo sapiens |
| 1230 | 11723467_a_at | brown | NADH:ubiquinone oxidoreductase subunit A3(NDUFA3)                             | Homo sapiens |
| 1252 | 11723695_s_at | brown | heat shock transcription factor 1(HSF1)                                       | Homo sapiens |
| 1322 | 11724264_a_at | brown | intraflagellar transport 22(IFT22)                                            | Homo sapiens |
| 1340 | 11724356_a_at | brown | transmembrane protein 177(TMEM177)                                            | Homo sapiens |
| 1364 | 11724594_at   | brown | HRAS like suppressor(HRASLS)                                                  | Homo sapiens |
| 1371 | 11724669_a_at | brown | mitochondrial ribosomal protein S22(MRPS22)                                   | Homo sapiens |
| 1390 | 11724780_x_at | brown | mitochondrial ribosomal protein S17(MRPS17)                                   | Homo sapiens |
| 1433 | 11725137_x_at | brown | synaptogyrin 1(SYNGR1)                                                        | Homo sapiens |
| 1484 | 11725563_at   | brown | chromosome 12 open reading frame 60(C12orf60)                                 | Homo sapiens |
| 1485 | 11725590_a_at | brown | nudix hydrolase 6(NUDT6)                                                      | Homo sapiens |
| 1486 | 11725612_x_at | brown | ARMC2 antisense RNA 1(ARMC2-AS1)                                              | Homo sapiens |
| 1491 | 11725635_a_at | brown | mitochondrial ribosomal protein S25(MRPS25)                                   | Homo sapiens |
| 1495 | 11725643_a_at | brown | mitochondrial ribosomal protein S26(MRPS26)                                   | Homo sapiens |
| 1536 | 11725991_a_at | brown | regulator of microtubule dynamics 1(RMDN1)                                    | Homo sapiens |
| 1568 | 11726264_s_at | brown | STE20-related kinase adaptor beta(STRADB)                                     | Homo sapiens |
| 1584 | 11726335_a_at | brown | cardiolipin synthase 1(CRLS1)                                                 | Homo sapiens |
| 1588 | 11726350_a_at | brown | ankyrin repeat domain 39(ANKRD39)                                             | Homo sapiens |
| 1628 | 11726662_a_at | brown | apolipoprotein O(APOO)                                                        | Homo sapiens |
| 1671 | 11727060_a_at | brown | mitochondrial ribosomal protein S36(MRPS36)                                   | Homo sapiens |
| 1743 | 11727820_a_at | brown | CDGSH iron sulfur domain 1(CISD1)                                             | Homo sapiens |
| 1768 | 11728021_a_at | brown | coiled-coil-helix-coiled-coil-helix domain containing 4(CHCHD4)               | Homo sapiens |
| 1769 | 11728027_x_at | brown | coiled-coil domain containing 58(CCDC58)                                      | Homo sapiens |
| 1773 | 11728040_x_at | brown | peroxiredoxin 5(PRDX5)                                                        | Homo sapiens |
| 1784 | 11728152_a_at | brown | histone cluster 1 H2B family member d(HIST1H2BD)                              | Homo sapiens |
| 1808 | 11728294_at   | brown | mitochondrial ribosomal protein L58(MRPL58)                                   | Homo sapiens |
| 1809 | 11728311_x_at | brown | ERCC excision repair 1, endonuclease non-catalytic subunit(ERCC1)             | Homo sapiens |
| 1810 | 11728317_a_at | brown | family with sequence similarity 122A(FAM122A)                                 | Homo sapiens |
| 1825 | 11728425_s_at | brown | bolA family member 3(BOLA3)                                                   | Homo sapiens |
| 1832 | 11728513_a_at | brown | NADH:ubiquinone oxidoreductase complex assembly factor 6(NDUFAF6)             | Homo sapiens |
| 1847 | 11728673_s_at | brown | kinesin family member 22(KIF22)                                               | Homo sapiens |
| 1855 | 11728741_at   | brown | coenzyme Q3, methyltransferase(COQ3)                                          | Homo sapiens |
| 1892 | 11729121_a_at | brown | McKusick-Kaufman syndrome(MKKS)                                               | Homo sapiens |
| 1893 | 11729122_x_at | brown | McKusick-Kaufman syndrome(MKKS)                                               | Homo sapiens |
| 1896 | 11729131_a_at | brown | proteasome activator subunit 3(PSM3)                                          | Homo sapiens |
| 1900 | 11729149_a_at | brown | mitochondrial ribosomal protein S23(MRPS23)                                   | Homo sapiens |
| 1916 | 11729311_a_at | brown | spexin hormone(SPX)                                                           | Homo sapiens |
| 1922 | 11729422_a_at | brown | popeye domain containing 3(POPDC3)                                            | Homo sapiens |
| 1950 | 11729669_a_at | brown | eukaryotic translation initiation factor 3 subunit K(EIF3K)                   | Homo sapiens |
| 1962 | 11729807_a_at | brown | cytochrome c oxidase subunit 6B1(COX6B1)                                      | Homo sapiens |
| 1978 | 11730044_a_at | brown | chromosome 9 open reading frame 24(C9orf24)                                   | Homo sapiens |
| 1992 | 11730186_a_at | brown | isocitrate dehydrogenase 3 (NAD(+)) beta(IDH3B)                               | Homo sapiens |
| 2021 | 11730451_at   | brown | succinate dehydrogenase complex assembly factor 4(SDHAF4)                     | Homo sapiens |
| 2032 | 11730659_s_at | brown | 3-oxoacyl-ACP synthase, mitochondrial(OXSM)                                   | Homo sapiens |
| 2092 | 11731248_a_at | brown | transmembrane protein 116(TMEM116)                                            | Homo sapiens |
| 2124 | 11731671_at   | brown | FUN14 domain containing 1(FUNDC1)                                             | Homo sapiens |
| 2178 | 11732322_at   | brown | frataxin(FXN)                                                                 | Homo sapiens |
| 2203 | 11732520_a_at | brown | RAD51 paralogue C(RAD51C)                                                     | Homo sapiens |
| 2215 | 11732582_a_at | brown | nudix hydrolase 22(NUDT22)                                                    | Homo sapiens |
| 2216 | 11732583_x_at | brown | nudix hydrolase 22(NUDT22)                                                    | Homo sapiens |

|      |               |       |                                                                                        |              |
|------|---------------|-------|----------------------------------------------------------------------------------------|--------------|
| 2262 | 11733134_a_at | brown | mitochondrial ribosomal protein S33(MRPS33)                                            | Homo sapiens |
| 2297 | 11733535_a_at | brown | nudix hydrolase 7(NUDT7)                                                               | Homo sapiens |
| 2298 | 11733576_a_at | brown | isocitrate dehydrogenase 3 (NAD(+)) beta(IDH3B)                                        | Homo sapiens |
| 2336 | 11733901_a_at | brown | ubiquinol-cytochrome c reductase complex III subunit VII(UQCRCQ)                       | Homo sapiens |
| 2348 | 11734033_a_at | brown | chromosome 15 open reading frame 61(C15orf61)                                          | Homo sapiens |
| 2371 | 11734491_a_at | brown | spermatogenesis associated 24(SPATA24)                                                 | Homo sapiens |
| 2396 | 11734731_x_at | brown | mitochondrial ribosomal protein S12(MRPS12)                                            | Homo sapiens |
| 2397 | 11734746_x_at | brown | CDKN2A interacting protein N-terminal like(CDKN2AIPNL)                                 | Homo sapiens |
| 2428 | 11735096_a_at | brown | MLX, MAX dimerization protein(MLX)                                                     | Homo sapiens |
| 2479 | 11736049_at   | brown | family with sequence similarity 229 member B(FAM229B)                                  | Homo sapiens |
| 2480 | 11736050_s_at | brown | family with sequence similarity 229 member B(FAM229B)                                  | Homo sapiens |
| 2573 | 11737309_x_at | brown | chromosome 14 open reading frame 2(C14orf2)                                            | Homo sapiens |
| 2600 | 11738018_a_at | brown | ARV1 homolog, fatty acid homeostasis modulator(ARV1)                                   | Homo sapiens |
| 2612 | 11738270_a_at | brown | stress associated endoplasmic reticulum protein family member 2(SERP2)                 | Homo sapiens |
| 2658 | 11739201_a_at | brown | ATP synthase, H+ transporting, mitochondrial Fo complex subunit C3 (subunit 9)(ATP5G3) | Homo sapiens |
| 2667 | 11739300_a_at | brown | CDGSH iron sulfur domain 3(CISD3)                                                      | Homo sapiens |
| 2696 | 11739512_a_at | brown | translocase of inner mitochondrial membrane 50(TIMM50)                                 | Homo sapiens |
| 2736 | 11739854_s_at | brown | LYR motif containing 1(LYRM1)                                                          | Homo sapiens |
| 2742 | 11739911_at   | brown | pterin-4 alpha-carbinolamine dehydratase 2(PCBD2)                                      | Homo sapiens |
| 2826 | 11741031_a_at | brown | HCLS1 associated protein X-1(HAX1)                                                     | Homo sapiens |
| 2845 | 11741192_a_at | brown | ribokinase(RBKS)                                                                       | Homo sapiens |
| 2857 | 11741365_x_at | brown | intraflagellar transport 22(IFT22)                                                     | Homo sapiens |
| 2889 | 11741789_a_at | brown | NADH:ubiquinone oxidoreductase subunit B6(NDUFB6)                                      | Homo sapiens |
| 2943 | 11742736_at   | brown | methylmalonyl-CoA epimerase(MCEE)                                                      | Homo sapiens |
| 2979 | 11743002_at   | brown | dynactin subunit 6(DCTN6)                                                              | Homo sapiens |
| 3009 | 11743264_x_at | brown | chromosome 14 open reading frame 2(C14orf2)                                            | Homo sapiens |
| 3014 | 11743330_a_at | brown | phosphoglycolate phosphatase(PGP)                                                      | Homo sapiens |
| 3033 | 11743474_a_at | brown | small integral membrane protein 4(SMIM4)                                               | Homo sapiens |
| 3106 | 11744040_a_at | brown | cytochrome c oxidase assembly factor 3(COA3)                                           | Homo sapiens |
| 3118 | 11744148_at   | brown | solute carrier family 25 member 10(SLC25A10)                                           | Homo sapiens |
| 3126 | 11744172_s_at | brown | DnaJ heat shock protein family (Hsp40) member C4(DNAJC4)                               | Homo sapiens |
| 3130 | 11744181_a_at | brown | phenylalanyl-tRNA synthetase 2, mitochondrial(FARS2)                                   | Homo sapiens |
| 3133 | 11744202_at   | brown | chromosome 19 open reading frame 70(C19orf70)                                          | Homo sapiens |
| 3134 | 11744207_a_at | brown | isocitrate dehydrogenase 3 (NAD(+)) beta(IDH3B)                                        | Homo sapiens |
| 3138 | 11744222_a_at | brown | ATP synthase, H+ transporting, mitochondrial F1 complex, delta subunit(ATP5D)          | Homo sapiens |
| 3139 | 11744223_x_at | brown | ATP synthase, H+ transporting, mitochondrial F1 complex, delta subunit(ATP5D)          | Homo sapiens |
| 3140 | 11744227_at   | brown | MACRO domain containing 1(MACROD1)                                                     | Homo sapiens |
| 3150 | 11744284_a_at | brown | mitochondrial ribosomal protein S12(MRPS12)                                            | Homo sapiens |
| 3160 | 11744384_x_at | brown | up-regulated during skeletal muscle growth 5 homolog (mouse)(USMG5)                    | Homo sapiens |
| 3161 | 11744400_a_at | brown | myosin light chain 6B(MYL6B)                                                           | Homo sapiens |
| 3162 | 11744401_a_at | brown | calmodulin binding transcription activator 1(CAMTA1)                                   | Homo sapiens |
| 3165 | 11744430_a_at | brown | kinesin family member 9(KIF9)                                                          | Homo sapiens |
| 3170 | 11744444_a_at | brown | NADH:ubiquinone oxidoreductase subunit B10(NDUFB10)                                    | Homo sapiens |
| 3173 | 11744455_s_at | brown | ubiquinol-cytochrome c reductase hinge protein like(UQCRHL)                            | Homo sapiens |
| 3183 | 11744545_s_at | brown | GTF2I repeat domain containing 2B(GTF2IRD2B)                                           | Homo sapiens |
| 3201 | 11744672_a_at | brown | MORN repeat containing 4(MORN4)                                                        | Homo sapiens |
| 3224 | 11744822_a_at | brown | NADH:ubiquinone oxidoreductase subunit B2(NDUFB2)                                      | Homo sapiens |
| 3227 | 11744838_a_at | brown | dual specificity phosphatase 28(DUSP28)                                                | Homo sapiens |
| 3241 | 11744978_a_at | brown | origin recognition complex subunit 4(ORC4)                                             | Homo sapiens |
| 3251 | 11745124_a_at | brown | 3-hydroxybutyrate dehydrogenase, type 1(BDH1)                                          | Homo sapiens |
| 3266 | 11745259_a_at | brown | chromosome 11 open reading frame 21(C11orf21)                                          | Homo sapiens |
| 3276 | 11745384_s_at | brown | NADH:ubiquinone oxidoreductase subunit B4(NDUFB4)                                      | Homo sapiens |
| 3283 | 11745460_at   | brown | NADH:ubiquinone oxidoreductase subunit V3(NDUFV3)                                      | Homo sapiens |
| 3299 | 11745555_a_at | brown | chromosome 11 open reading frame 74(C11orf74)                                          | Homo sapiens |
| 3300 | 11745556_x_at | brown | chromosome 11 open reading frame 74(C11orf74)                                          | Homo sapiens |
| 3368 | 11746331_a_at | brown | adenosine kinase(ADK)                                                                  | Homo sapiens |
| 3373 | 11746372_a_at | brown | nudix hydrolase 6(NUDT6)                                                               | Homo sapiens |
| 3390 | 11746586_a_at | brown | NADH:ubiquinone oxidoreductase core subunit S7(NDUFS7)                                 | Homo sapiens |
| 3413 | 11746855_a_at | brown | NAD(P)HX epimerase(NAXE)                                                               | Homo sapiens |
| 3448 | 11747278_a_at | brown | malate dehydrogenase 2(MDH2)                                                           | Homo sapiens |
| 3547 | 11748343_a_at | brown | intraflagellar transport 22(IFT22)                                                     | Homo sapiens |
| 3548 | 11748344_x_at | brown | intraflagellar transport 22(IFT22)                                                     | Homo sapiens |
| 3571 | 11748695_a_at | brown | synaptogyrin 1(SYNGR1)                                                                 | Homo sapiens |
| 3613 | 11749229_a_at | brown | sirtuin 5(SIRT5)                                                                       | Homo sapiens |
| 3630 | 11749398_a_at | brown | B9 domain containing 1(B9D1)                                                           | Homo sapiens |
| 3631 | 11749399_x_at | brown | MAPK regulated corepressor interacting protein 2(MCRIP2)                               | Homo sapiens |
| 3635 | 11749430_a_at | brown | NADH:ubiquinone oxidoreductase complex assembly factor 6(NDUFAF6)                      | Homo sapiens |
| 3686 | 11750006_a_at | brown | cytochrome c oxidase assembly factor 1 homolog(COA1)                                   | Homo sapiens |
| 3709 | 11750223_a_at | brown | NAD(P)HX epimerase(NAXE)                                                               | Homo sapiens |
| 3715 | 11750293_a_at | brown | RAD51 paralogue C(RAD51C)                                                              | Homo sapiens |
| 3810 | 11751680_a_at | brown | ubiquinol-cytochrome c reductase binding protein(UQCRB)                                | Homo sapiens |
| 3816 | 11751746_a_at | brown | guanidinoacetate N-methyltransferase(GAMT)                                             | Homo sapiens |
| 3821 | 11751778_s_at | brown | translocase of inner mitochondrial membrane 23(TIMM23)                                 | Homo sapiens |
| 3935 | 11753322_a_at | brown | diphthamide biosynthesis 5(DPH5)                                                       | Homo sapiens |
| 3964 | 11753755_x_at | brown | ATP synthase, H+ transporting, mitochondrial Fo complex subunit F2(ATP5J2)             | Homo sapiens |
| 3966 | 11753799_a_at | brown | small integral membrane protein 11A(SMIM11A)                                           | Homo sapiens |
| 3967 | 11753800_x_at | brown | small integral membrane protein 11A(SMIM11A)                                           | Homo sapiens |
| 3971 | 11753843_a_at | brown | NADH:ubiquinone oxidoreductase subunit A3(NDUFA3)                                      | Homo sapiens |
| 3972 | 11753844_x_at | brown | NADH:ubiquinone oxidoreductase subunit A3(NDUFA3)                                      | Homo sapiens |
| 3977 | 11753871_a_at | brown | G protein subunit gamma 7(GNG7)                                                        | Homo sapiens |
| 3978 | 11753872_x_at | brown | metallothionein 3(MT3)                                                                 | Homo sapiens |
| 3993 | 11753996_x_at | brown | heat shock protein family E (Hsp10) member 1(HSPE1)                                    | Homo sapiens |

|      |                |       |                                                                                        |              |
|------|----------------|-------|----------------------------------------------------------------------------------------|--------------|
| 3994 | 11754015_a_at  | brown | translocase of inner mitochondrial membrane 50(TIMM50)                                 | Homo sapiens |
| 3995 | 11754016_x_at  | brown | translocase of inner mitochondrial membrane 50(TIMM50)                                 | Homo sapiens |
| 4000 | 11754034_a_at  | brown | reactive intermediate imine deaminase A homolog(RIDA)                                  | Homo sapiens |
| 4010 | 11754161_s_at  | brown | phosphatidylinositol glycan anchor biosynthesis class P(PIGP)                          | Homo sapiens |
| 4053 | 11754444_x_at  | brown | cytochrome c oxidase subunit 6C(COX6C)                                                 | Homo sapiens |
| 4059 | 11754489_a_at  | brown | NADH:ubiquinone oxidoreductase complex assembly factor 5(NDUFAF5)                      | Homo sapiens |
| 4077 | 11754623_x_at  | brown | choline phosphotransferase 1(CHPT1)                                                    | Homo sapiens |
| 4083 | 11754652_a_at  | brown | enoyl-CoA delta isomerase 2(ECI2)                                                      | Homo sapiens |
| 4090 | 11754707_a_at  | brown | CUE domain containing 2(CUEDC2)                                                        | Homo sapiens |
| 4104 | 11754783_x_at  | brown | COMM domain containing 3(COMMD3)                                                       | Homo sapiens |
| 4117 | 11754861_s_at  | brown | succinate-CoA ligase alpha subunit(SUCLG1)                                             | Homo sapiens |
| 4132 | 11754964_a_at  | brown | NADH:ubiquinone oxidoreductase subunit A10(NDUFA10)                                    | Homo sapiens |
| 4175 | 11755269_a_at  | brown | URGCP-MRPS24 readthrough(URGCP-MRPS24)                                                 | Homo sapiens |
| 4191 | 11755346_x_at  | brown | ATP synthase, H+ transporting, mitochondrial F1 complex, O subunit(ATP5O)              | Homo sapiens |
| 4192 | 11755347_x_at  | brown | secretion associated Ras related GTPase 1B(SAR1B)                                      | Homo sapiens |
| 4210 | 11755458_a_at  | brown | HD domain containing 2(HDDC2)                                                          | Homo sapiens |
| 4239 | 11755710_a_at  | brown | GTP binding protein 8 (putative)(GTPBP8)                                               | Homo sapiens |
| 4256 | 11755876_a_at  | brown | interferon related developmental regulator 2(IFRD2)                                    | Homo sapiens |
| 4285 | 11756125_x_at  | brown | NADH:ubiquinone oxidoreductase subunit A1(NDUFA1)                                      | Homo sapiens |
| 4298 | 11756211_s_at  | brown | Hikeshi, heat shock protein nuclear import factor(HIKESHI)                             | Homo sapiens |
| 4324 | 11756351_x_at  | brown | superoxide dismutase 1, soluble(SOD1)                                                  | Homo sapiens |
| 4346 | 11756500_x_at  | brown | diphthamide biosynthesis 5(DPH5)                                                       | Homo sapiens |
| 4351 | 11756526_a_at  | brown | mitochondrial ribosomal protein L48(MRPL48)                                            | Homo sapiens |
| 4368 | 11756652_a_at  | brown | N-terminal Xaa-Pro-Lys N-methyltransferase 1(NTMT1)                                    | Homo sapiens |
| 4373 | 11756687_a_at  | brown | mitochondrial ribosomal protein L46(MRPL46)                                            | Homo sapiens |
| 4382 | 11756757_x_at  | brown | short chain dehydrogenase/reductase family 39U member 1(SDR39U1)                       | Homo sapiens |
| 4426 | 11757073_s_at  | brown | THAP domain containing 4(THAP4)                                                        | Homo sapiens |
| 4427 | 11757083_s_at  | brown | coiled-coil-helix-coiled-coil-helix domain containing 3(CHCHD3)                        | Homo sapiens |
| 4438 | 11757265_x_at  | brown | eukaryotic translation initiation factor 3 subunit K(EIF3K)                            | Homo sapiens |
| 4439 | 11757267_x_at  | brown | sirtuin 2(SIRT2)                                                                       | Homo sapiens |
| 4444 | 11757279_a_at  | brown | translocase of inner mitochondrial membrane domain containing 1(TIMMDC1)               | Homo sapiens |
| 4445 | 11757281_a_at  | brown | ATP synthase, H+ transporting, mitochondrial Fo complex subunit C3 (subunit 9)(ATP5G3) | Homo sapiens |
| 4446 | 11757282_x_at  | brown | ATP synthase, H+ transporting, mitochondrial Fo complex subunit C3 (subunit 9)(ATP5G3) | Homo sapiens |
| 4454 | 11757330_x_at  | brown | small nuclear ribonucleoprotein polypeptide C(SNRPC)                                   | Homo sapiens |
| 4456 | 11757334_a_at  | brown | ubiquinol-cytochrome c reductase, complex III subunit XI(UQCR11)                       | Homo sapiens |
| 4471 | 11757405_a_at  | brown | methionine sulfoxide reductase B2(MSRB2)                                               | Homo sapiens |
| 4473 | 11757413_a_at  | brown | NADH:ubiquinone oxidoreductase core subunit S3(NDUFS3)                                 | Homo sapiens |
| 4477 | 11757429_a_at  | brown | cytochrome c1(CYC1)                                                                    | Homo sapiens |
| 4483 | 11757446_x_at  | brown | MINOS1-NBL1 readthrough(MINOS1-NBL1)                                                   | Homo sapiens |
| 4495 | 11757485_x_at  | brown | family with sequence similarity 129 member B(FAM129B)                                  | Homo sapiens |
| 4513 | 11757567_x_at  | brown | NADH:ubiquinone oxidoreductase subunit B5(NDUFB5)                                      | Homo sapiens |
| 4516 | 11757589_a_at  | brown | NADH:ubiquinone oxidoreductase subunit A12(NDUFA12)                                    | Homo sapiens |
| 4519 | 11757601_a_at  | brown | COP9 signalosome subunit 3(COPS3)                                                      | Homo sapiens |
| 4522 | 11757613_x_at  | brown | eukaryotic translation initiation factor 3 subunit K(EIF3K)                            | Homo sapiens |
| 4529 | 11757649_a_at  | brown | CORO7-PAM16 readthrough(CORO7-PAM16)                                                   | Homo sapiens |
| 4535 | 11757670_a_at  | brown | ubiquinol-cytochrome c reductase, complex III subunit X(UQCR10)                        | Homo sapiens |
| 4536 | 11757672_s_at  | brown | mitochondrial ribosomal protein S17(MRPS17)                                            | Homo sapiens |
| 4540 | 11757727_x_at  | brown | ATP synthase, H+ transporting, mitochondrial F1 complex, O subunit(ATP5O)              | Homo sapiens |
| 4555 | 11757825_a_at  | brown | C7orf55-LUC7L2 readthrough(C7orf55-LUC7L2)                                             | Homo sapiens |
| 4559 | 11757847_s_at  | brown | ubiquinol-cytochrome c reductase, Rieske iron-sulfur polypeptide 1(UQCRFS1)            | Homo sapiens |
| 4560 | 11757863_x_at  | brown | transmembrane protein 261(TMEM261)                                                     | Homo sapiens |
| 4578 | 11757936_s_at  | brown | glycine cleavage system protein H pseudogene 3(GCSHP3)                                 | Homo sapiens |
| 4613 | 11758135_s_at  | brown | chromosome 14 open reading frame 2(C14orf2)                                            | Homo sapiens |
| 4651 | 11758314_s_at  | brown | NADH:ubiquinone oxidoreductase complex assembly factor 2(NDUFAF2)                      | Homo sapiens |
| 4658 | 11758343_s_at  | brown | up-regulated during skeletal muscle growth 5 homolog (mouse)(USMG5)                    | Homo sapiens |
| 4685 | 11758566_s_at  | brown | BCS1 homolog, ubiquinol-cytochrome c reductase complex chaperone(BCS1L)                | Homo sapiens |
| 4702 | 11758717_x_at  | brown | NDUFA4, mitochondrial complex associated(NDUFA4)                                       | Homo sapiens |
| 4703 | 11758727_x_at  | brown | ATP synthase, H+ transporting, mitochondrial F1 complex, gamma polypeptide 1(ATP5C1)   | Homo sapiens |
| 4712 | 11758795_at    | brown | mitochondrial ribosomal protein L45(MRPL45)                                            | Homo sapiens |
| 4769 | 11759522_a_at  | brown | alkB homolog 7(ALKBH7)                                                                 | Homo sapiens |
| 4770 | 11759523_x_at  | brown | alkB homolog 7(ALKBH7)                                                                 | Homo sapiens |
| 4772 | 11759553_at    | brown | translocase of inner mitochondrial membrane 8 homolog B(TIMM8B)                        | Homo sapiens |
| 4777 | 11759575_at    | brown | ubiquinol-cytochrome c reductase hinge protein like(UQCRHL)                            | Homo sapiens |
| 4787 | 11759645_x_at  | brown | COX11, cytochrome c oxidase copper chaperone(COX11)                                    | Homo sapiens |
| 4794 | 11759687_a_at  | brown | small nuclear RNA activating complex polypeptide 5(SNAPC5)                             | Homo sapiens |
| 4834 | 11760482_x_at  | brown | NADH:ubiquinone oxidoreductase core subunit S7(NDUFS7)                                 | Homo sapiens |
| 4846 | 11761076_x_at  | brown | acyl-CoA thioesterase 8(ACOT8)                                                         | Homo sapiens |
| 4881 | 11762275_x_at  | brown | ubiquinol-cytochrome c reductase binding protein(UQCRB)                                | Homo sapiens |
| 4904 | 11763032_x_at  | brown | adipogenesis associated Mth938 domain containing(AAMDC)                                | Homo sapiens |
| 4905 | 11763101_x_at  | brown | NADH:ubiquinone oxidoreductase subunit B9(NDUFB9)                                      | Homo sapiens |
| 4964 | 11763960_a_at  | brown | NADH:ubiquinone oxidoreductase subunit B3(NDUFB3)                                      | Homo sapiens |
| 4966 | 11763990_a_at  | brown | alkB homolog 7(ALKBH7)                                                                 | Homo sapiens |
| 4988 | 200086_PM_s_at | brown | cytochrome c oxidase subunit 4I1(COX4I1)                                               | Homo sapiens |

**Grey (unassigned) Module**

| gene               | hcolor | Name                                                      | Species      |
|--------------------|--------|-----------------------------------------------------------|--------------|
| 221 11716694_at    | grey   | tetraspanin 6(TSPAN6)                                     | Homo sapiens |
| 604 11719232_x_at  | grey   | protein tyrosine phosphatase, receptor type 5(PTPRS)      | Homo sapiens |
| 976 11721706_at    | grey   | glycerol-3-phosphate acyltransferase, mitochondrial(GPAM) | Homo sapiens |
| 1699 11727404_a_at | grey   | glypican 4(GPC4)                                          | Homo sapiens |
| 4330 11756375_x_at | grey   | ETS variant 7(ETV7)                                       | Homo sapiens |
| 4399 11756854_a_at | grey   | EH domain binding protein 1(EHBP1)                        | Homo sapiens |
